# Supplementary material for: Unraveling polar Diels–Alder reactions with conceptual DFT analysis and the distortion/interaction model
Source: Royal Society of Chemistry journal article supplement (doi:10.1039/c3ob41628c), 2013-09-09
Supplement: c3ob41628c.pdf [file c3ob41628c.pdf]

# Unraveling polar Diels-Alder reactions with conceptual DFT analysis and the distortion/interaction model

Ariel M. Sarotti\*

Instituto de Química Rosario (CONICET), Facultad de Ciencias Bioquímicas y Farmacéuticas, Universidad Nacional de Rosario, Suipacha 531, Rosario (2000), Argentina  
[sarotti@iquir-conicet.gov.ar](mailto:sarotti@iquir-conicet.gov.ar)

## List of contents:

- Computational methods. Page S2.
- Global and local reactivity indices, FMO energies and LUMO  $p_z$  coefficients for all reactants calculated at the B3LYP/6-31G\* level (Tables S1-S3). Pages S4-S6.
- C1-C6 and C2-C3 bond forming distances, asynchronicity ( $\Delta d$ ) and charge transfer for all transition structures found at the B3LYP/6-31G\* level (Tables S4-S7). Pages S7-S10.
- Different methods to quantify the asynchronicity, comparison between them (Table S8, and Figures S2-S3). Pages S11- S13.
- Plots of  $\Delta d$  vs.  $\Delta \text{LUMO}_{1,2}$  and  $\Delta d$  vs.  $\Delta \omega_k$  for the reactions between **1-70** and **CP** (Figures S4-S5), and difference between computed and predicted  $\Delta d$  (Table S10). Pages S14- S15.
- B3LYP/6-31G\* energies (E), zero-point corrected energies (ZPE), enthalpies (H) and Gibbs free energies (G) for all reagents, transition structures and products (in au) (Tables S11-S19). Pages S16-S24.
- B3LYP/6-31G\* activation and reaction energies ( $\Delta E^\ddagger$  &  $\Delta E_{\text{rxn}}$ ), zero-point corrected energies ( $\Delta \text{ZPE}^\ddagger$  &  $\Delta \text{ZPE}_{\text{rxn}}$ ), enthalpies ( $\Delta H^\ddagger$  &  $\Delta H_{\text{rxn}}$ ) and Gibbs free energies ( $\Delta G^\ddagger$  &  $\Delta G_{\text{rxn}}$ ) for all reactions under study (in kcal/mol) (Tables S20-S27). Pages S25-S32.
- CBS-QB3 energies (E), zero-point corrected energies (ZPE), enthalpies (H) and Gibbs free energies (G) (in au), and activation energies ( $\Delta E^\ddagger$ ), zero-point corrected energies ( $\Delta \text{ZPE}^\ddagger$ ), enthalpies ( $\Delta H^\ddagger$ ) and Gibbs free energies ( $\Delta G^\ddagger$ ) (in kcal/mol) computed for the reactions between the selected 35 dienophiles and **CP** (Tables S28-S30). Pages S33-S35.
- Plot of CBS-QB3  $\Delta G^\ddagger$  vs. B3LYP/6-31G\*  $\Delta G^\ddagger$  (Figure S6). Page S35.
- M06-2X/6-31G\* energies (E), zero-point corrected energies (ZPE), enthalpies (H) and Gibbs free energies (G) (in au), and activation energies ( $\Delta E^\ddagger$ ), zero-point corrected energies ( $\Delta \text{ZPE}^\ddagger$ ), enthalpies ( $\Delta H^\ddagger$ ) and Gibbs free energies ( $\Delta G^\ddagger$ ) (in kcal/mol) computed for the reactions between the selected 35 dienophiles and **CP** (Tables S31-S33). Pages S36-S38.
- Plot of M06-2X/6-31G\*  $\Delta G^\ddagger$  vs. B3LYP/6-31G\*  $\Delta G^\ddagger$  (Figure S7). Page S38.
- Plots of  $\Delta H^\ddagger$  vs.  $-\Delta H_{\text{rxn}}$  for all reactions under study (Figure S8). Page S39.
- B3LYP/6-31G\* diene distortion energy ( $\Delta E_d^\ddagger$ ), dienophile distortion energy ( $\Delta E_{d-C=C}^\ddagger$ ), total distortion energy ( $\Delta E_d^\ddagger$ ) and interaction energy ( $\Delta E_i^\ddagger$ ) for all reactions under study (in kcal/mol) (Tables S34-S37). Pages S40-S43.
- Plots of  $\Delta E_d^\ddagger$  vs.  $\omega$  for all reactions under study (Figure S9). Page S44.
- Plots of  $\Delta E_i^\ddagger$  vs.  $\omega$  for similarly distorted TSs (Figure S10) and  $\Delta E^\ddagger$  vs.  $\Delta E_d^\ddagger$  for reagents with similar  $\omega$  values (Figure S11). Page S45.
- B3LYP/6-31G\* activation energies ( $\Delta E^\ddagger$ ), zero-point corrected energies ( $\Delta \text{ZPE}^\ddagger$ ), enthalpies ( $\Delta H^\ddagger$ ) and Gibbs free energies ( $\Delta G^\ddagger$ ), diene distortion energy ( $\Delta E_d^\ddagger$ ), dienophile distortion energy ( $\Delta E_{d-C=C}^\ddagger$ ), total distortion energy ( $\Delta E_d^\ddagger$ ) and interaction energy ( $\Delta E_i^\ddagger$ ) computed for the reactions between ethylene and **CP**, **CH**, **BU** and **DMB** (in kcal/mol) (Tables S38-S39), and optimized geometries for the TSs found (Figure S12). Page S46.
- ANOVA of the most significant factors of  $\Delta E_i^\ddagger$  and  $\Delta E_{d-C=C}^\ddagger$ , and coefficient values of Eq. 4 (Tables S40-S41). Pages S47- S48.
- Definition of the bending angles, dihedral angles and out-of-plane deformations (Figure S13), and  $\Delta d_{C1C2}$ ,  $\Delta \phi$ ,  $\theta_{1-4}$ ,  $\tau$ ,  $\chi_{C1}$  and  $\chi_{C1}$  values for the dienophile fragments (Tables S42-S45). Pages S48-S52.
- Plots of the average  $d_{C1C2}$  vs. NS and RS, and average bending angles ( $\phi_{\text{av}}$ ) vs. NS and RS, for the all dienophiles, TSs and products corresponding to the DA reactions of **1-70** and **CP** (Figures S14-S17). Pages S53-S54.
- Plots of  $\Delta E_d^\ddagger$  vs.  $\Delta E_{d-C=C}^\ddagger$  for all reactions under study (Figure S18). Page S55.
- ANOVA of the most significant factors of  $\Delta E_{d-C=C}^\ddagger$  and coefficient values of Eq. 5 (Table S46). Page S56.
- Definition of the dihedral angles and out-of-plane deformations (Figure S19), and  $\Delta \theta_{1-8}$ ,  $\Delta d_{C3C6}$ ,  $\tau_{56}$ ,  $\tau_{34}$ ,  $\chi_{C3}$ ,  $\chi_{C4}$ ,  $\chi_{C5}$  and  $\chi_{C6}$  values for all the diene fragments (Tables S47-S54). Pages S56-S64.
- ANOVA of the most significant factors of  $\Delta E_d^\ddagger$  (Table S55). Page S65.
- Plots of  $\Delta E_d^\ddagger$  predicted from Eq. 6 (using  $\Delta d$ ) vs.  $\Delta E_d^\ddagger$  predicted from Eq. 6 (using  $\Delta \omega_k$ ), and plot of B3LYP/6-31G\* activation barriers vs. the  $\Delta E^\ddagger$  predicted from Eq. 3 and 6 for all reactions under study (Figure S20-S21). Page S66.
- Distortion/interaction analysis of the Diels-Alder reactions between **1**, **16**, **18**, **24**, **33**, **40**, **41**, **48**, **55** and **56** with **CP**, along the reaction coordinate projected onto the average forming C-C distances (Figures S22-S31). Pages S67-S70.
- Plot of CT vs average bond forming C-C distances for the 10 selected reactions (Figure S32). Page S71.
- Cartesian coordinates of B3LYP/6-31G\* optimized geometries of all reagents, TSs and products under study. Pages S72-S208.

### Computational methods

All calculations were performed using Gaussian 09.<sup>1</sup> Density functional theory (DFT) calculations were carried out with the B3LYP<sup>2</sup> and M06-2X<sup>3</sup> functionals with the standard 6-31G\* basis set.<sup>4</sup> High accuracy CBS calculations were carried out with the CBS-QB3 method.<sup>5</sup> Geometries for all structures were fully optimized and normal coordinate analyses were used to confirm the nature of the stationary points. All transition structures were confirmed to have only one imaginary frequency corresponding to the formation of the expected bonds. Intrinsic Reaction Coordinate (IRC) calculations were performed to determine the connections between stationary points. The electronic structures of TSs and ground states were analyzed in terms of the Wiberg bond indices (WBI) and the natural charges obtained from the Natural Bond Orbital (NBO) program as implemented in Gaussian 09.<sup>6</sup> Reported thermochemical properties include zero-point energies (ZPEs) without scaling and were calculated at 1 atm and 298.15 K. Distortion energies were computed by performing a single point energy calculation using B3LYP/6-31G\* on each of the separated, distorted fragments. The global electrophilicity index,  $\omega$ , which measures the energy stabilization when the system acquires an additional electronic charge  $\Delta N$  from the environment,<sup>7</sup> has been given by the following expression,  $\omega = \mu^2/2\eta$ , in terms of the electronic chemical potential  $\mu$  and the chemical hardness  $\eta$ . Both quantities may be approached in terms of the one-electron energies for the frontier molecular orbitals HOMO and LUMO,  $\varepsilon_H$  and  $\varepsilon_L$ , as  $\mu \approx (\varepsilon_H + \varepsilon_L)/2$  and  $\eta \approx (\varepsilon_L - \varepsilon_H)$ , respectively.<sup>8</sup> The nucleophilicity index, N, was computed as  $N = E_{\text{HOMO(diene)}} - E_{\text{HOMO(TCE)}} \text{ (eV)}$ ,<sup>9</sup> where TCE accounts for tetracyanoethylene. The local electrophilic indices,  $\omega_k$ ,<sup>10</sup> were computed according to the following expression:  $\omega_k = \omega \cdot P_k^+$ , where  $P_k^+$  is the electrophilic Parr function of atom k,<sup>11</sup> that was computed using the Mulliken atomic spin density (ASD) computed by single-point UB3LYP/6-31G\* level of the anion resulting from adding one electron to the optimized neutral B3LYP/6-31G\* geometry. The analysis of ANOVA were carried out using the Historical Data Response Surface Method (RSM) implemented in the software Design-Expert<sup>TM</sup>.

---

<sup>1</sup> Frisch, M. J.; Trucks, G. W.; Schlegel, H. B.; Scuseria, G. E.; Robb, M. A.; Cheeseman, J. R.; Scalmani, G.; Barone, V.; Mennucci, B.; Petersson, G. A.; Nakatsuji, H.; Caricato, M.; Li, X.; Hratchian, H. P.; Izmaylov, A. F.; Bloino, J.; Zheng, G.; Sonnenberg, J. L.; Hada, M.; Ehara, M.; Toyota, K.; Fukuda, R.; Hasegawa, J.; Ishida, M.; Nakajima, T.; Honda, Y.; Kitao, O.; Nakai, H.; Vreven, T.; Montgomery, J. A., Jr.; Peralta, J. E.; Ogliaro, F.; Bearpark, M.; Heyd, J. J.; Brothers, E.; Kudin, K. N.; Staroverov, V. N.; Kobayashi, R.; Normand, J.; Raghavachari, K.; Rendell, A.; Burant, J. C.; Iyengar, S. S.; Tomasi, J.; Cossi, M.; Rega, N.; Millam, J. M.; Klene, M.; Knox, J. E.; Cross, J. B.; Bakken, V.; Adamo, C.; Jaramillo, J.; Gomperts, R.; Stratmann, R. E.; Yazyev, O.; Austin, A. J.; Cammi, R.; Pomelli, C.; Ochterski, J. W.; Martin, R. L.; Morokuma, K.; Zakrzewski, V. G.; Voth, G. A.; Salvador, P.; Dannenberg, J. J.; Dapprich, S.; Daniels, A. D.; Farkas, O.; Foresman, J. B.; Ortiz, J. V.; Cioslowski, J. and Fox, D. J. Gaussian 09, Gaussian, Inc., Wallingford CT, 2009.

<sup>2</sup> (a) Lee, C.; Yang, W.; Parr, R. G. *Phys. Rev. B* **1988**, *37*, 785-789. (b) Becke, A. D. *J. Chem. Phys.* **1993**, *98*, 1372-1377. (c) Becke, A. D. *J. Chem. Phys.* **1993**, *98*, 5648-5652.

<sup>3</sup> Zhao, Y.; Truhlar, D.G. *Acc. Chem. Res.* **2008**, *41*, 157.

<sup>4</sup> Hehre, W.J.; Radom, L.; Schleyer, R.v.R.; Pople, J.A. *Ab initio Molecular Orbital Theory*, Wiley: New York, 1986.

<sup>5</sup> (a) Montgomery, J.A.; Frisch, M.J.; Ochterski, J.W.; Petersson, G.A. *J. Chem. Phys.* **2000**, *112*, 6532. (b) Montgomery, J.A.; Frisch, M.J.; Ochterski, J.W.; Petersson, G.A. *J. Chem. Phys.* **1999**, *110*, 2822. (c) Petersson, G.A.; Malick, D.K.; Wilson, W.G.; Ochterski, J.W.; Montgomery, J.A.; Frisch, M.J. *J. Chem. Phys.* **1998**, *109*, 10570.

<sup>6</sup> NBO Version 3.1, Glendening, E. D.; Reed, A. E.; Carpenter, J. E.; Weinhold, F. For some original literature references, see: (a) Reed, A. E.; Weinstock, R. B.; Weinhold, F. *J. Chem. Phys.* **1985**, *83*, 735-746. (b) Reed, A. E.; Curtiss, L. A.; Weinhold, F. *Chem. Rev.* **1988**, *88*, 899-926.

<sup>7</sup> Parr, R.G.; von Szentpaly, L.; Liu, S. *J. Am. Chem. Soc.* **1999**, *121*, 1922-1924.

<sup>8</sup> a) Parr, R.G.; Pearson, R.G. *J. Am. Chem. Soc.* **1983**, *105*, 7512-7516. b) Parr, R.G.; Yang, W. *Density Functional Theory of Atoms and Molecules*; Oxford University Press: New York, 1989.

<sup>9</sup> Domingo, L.R.; Chamorro, E.; Pérez, P. *J. Org. Chem.* **2008**, *73*, 4615-4624.

<sup>10</sup> Domingo, L.R.; Aurell, M.J.; Pérez, P.; Contreras, R. *J. Phys. Chem. A* **2002**, *106*, 6871.

<sup>11</sup> Domingo, L.R.; Pérez, P.; Sáez, J.A. *RSC Adv.* **2013**, *3*, 1486.

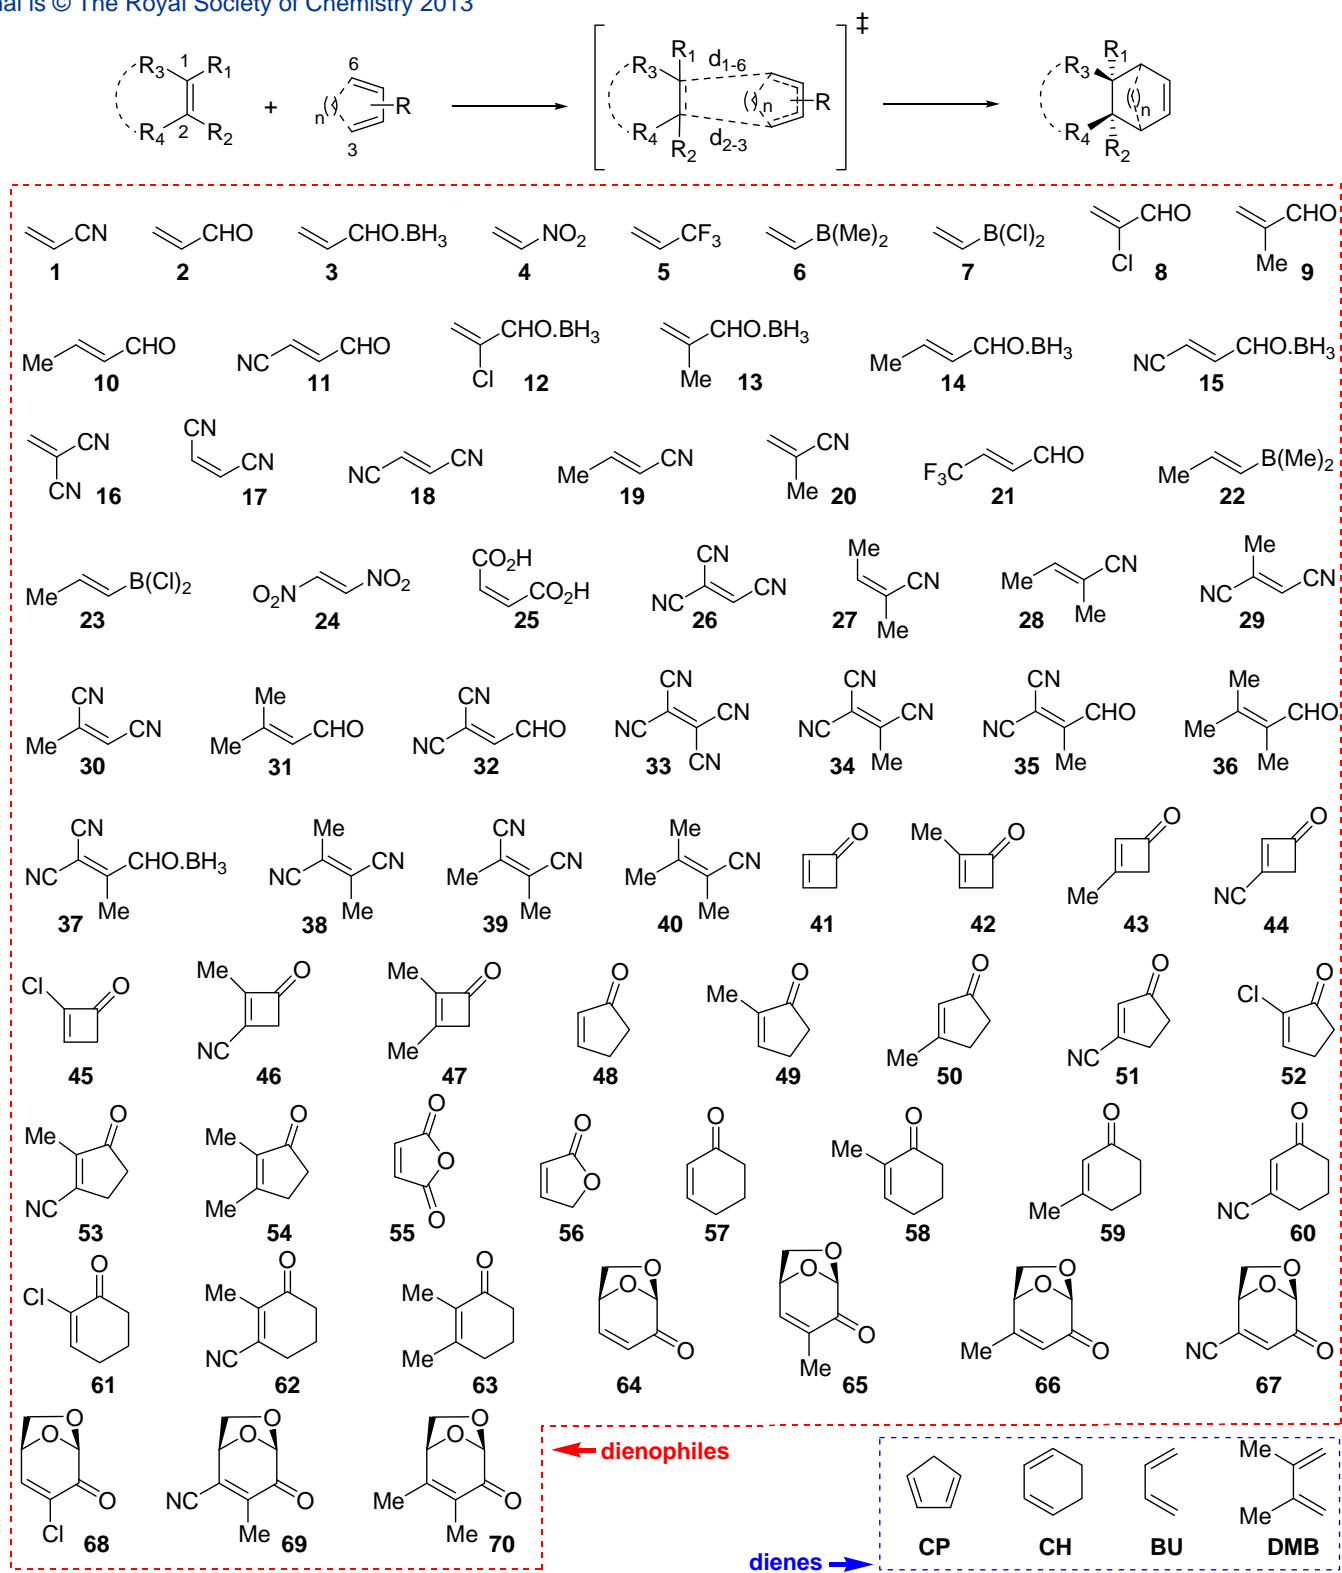

Figure S1. Set of dienophiles and dienes used in this study.

Table S1. Global reactivity indices and FMO energies for all reactants calculated at the B3LYP/6-31G\* level.

|                     | HOMO<br>(eV) | LUMO<br>(eV) | $\omega$<br>(eV) | $\mu$<br>(au) | $\eta$<br>(au) | N<br>(eV) |
|---------------------|--------------|--------------|------------------|---------------|----------------|-----------|
| CP                  | -5.76        | -0.27        | 0.83             | -0.1107       | 0.2016         | 3.37      |
| CH                  | -5.59        | -0.47        | 0.89             | -0.1113       | 0.1884         | 3.53      |
| BU ( <i>s-cis</i> ) | -6.29        | -0.62        | 1.05             | -0.1270       | 0.2083         | 2.83      |
| DMB( <i>s-cis</i> ) | -6.14        | -0.10        | 0.81             | -0.1147       | 0.2221         | 2.98      |
| 1                   | -7.87        | -1.53        | 1.74             | -0.1728       | 0.2329         | 1.25      |
| 2                   | -7.00        | -1.77        | 1.84             | -0.1611       | 0.1921         | 2.12      |
| 3                   | -7.20        | -3.07        | 3.20             | -0.1887       | 0.1516         | 1.92      |
| 4                   | -8.05        | -2.60        | 2.61             | -0.1958       | 0.2002         | 1.07      |
| 5                   | -8.13        | -0.55        | 1.24             | -0.1594       | 0.2784         | 0.99      |
| 6                   | -7.46        | -1.20        | 1.50             | -0.1590       | 0.2300         | 1.66      |
| 7                   | -8.08        | -2.21        | 2.25             | -0.1891       | 0.2159         | 1.04      |
| 8                   | -7.52        | -2.17        | 2.19             | -0.1779       | 0.1967         | 1.60      |
| 9                   | -6.95        | -1.59        | 1.70             | -0.1569       | 0.1970         | 2.17      |
| 10                  | -6.79        | -1.59        | 1.69             | -0.1539       | 0.1910         | 2.33      |
| 11                  | -7.73        | -3.10        | 3.17             | -0.1990       | 0.1701         | 1.39      |
| 12                  | -7.42        | -3.37        | 3.59             | -0.1982       | 0.1489         | 1.70      |
| 13                  | -7.15        | -2.88        | 2.95             | -0.1844       | 0.1567         | 1.97      |
| 14                  | -6.98        | -2.77        | 2.82             | -0.1791       | 0.1547         | 2.14      |
| 15                  | -7.61        | -4.14        | 4.98             | -0.2160       | 0.1275         | 1.51      |
| 16                  | -8.47        | -2.82        | 2.82             | -0.2074       | 0.2076         | 0.65      |
| 17                  | -8.32        | -2.99        | 3.01             | -0.2078       | 0.1956         | 0.80      |
| 18                  | -8.36        | -3.06        | 3.08             | -0.2099       | 0.1946         | 0.76      |
| 19                  | -7.42        | -1.22        | 1.50             | -0.1586       | 0.2279         | 1.70      |
| 20                  | -7.54        | -1.23        | 1.52             | -0.1611       | 0.2320         | 1.58      |
| 21                  | -7.51        | -2.48        | 2.48             | -0.1835       | 0.1847         | 1.61      |
| 22                  | -7.04        | -1.00        | 1.34             | -0.1477       | 0.2222         | 2.08      |
| 23                  | -7.64        | -1.96        | 2.03             | -0.1764       | 0.2085         | 1.48      |
| 24                  | -8.82        | -4.16        | 4.52             | -0.2385       | 0.1711         | 0.30      |
| 25                  | -7.47        | -2.84        | 2.87             | -0.1893       | 0.1701         | 1.65      |
| 26                  | -8.79        | -4.07        | 4.39             | -0.2364       | 0.1733         | 0.33      |
| 27                  | -7.12        | -0.97        | 1.33             | -0.1485       | 0.2260         | 2.00      |
| 28                  | -7.10        | -0.92        | 1.30             | -0.1475       | 0.2272         | 2.02      |
| 29                  | -8.02        | -2.73        | 2.73             | -0.1976       | 0.1942         | 1.10      |
| 30                  | -7.97        | -2.66        | 2.66             | -0.1953       | 0.1952         | 1.15      |
| 31                  | -6.61        | -1.42        | 1.55             | -0.1475       | 0.1906         | 2.51      |
| 32                  | -8.22        | -4.05        | 4.51             | -0.2253       | 0.1532         | 0.90      |
| 33                  | -9.12        | -4.96        | 5.95             | -0.2587       | 0.1531         | 0.00      |
| 34                  | -8.43        | -3.71        | 3.90             | -0.2231       | 0.1735         | 0.69      |
| 35                  | -8.13        | -3.76        | 4.05             | -0.2185       | 0.1604         | 0.99      |
| 36                  | -6.60        | -1.35        | 1.51             | -0.1462       | 0.1931         | 2.52      |
| 37                  | -7.85        | -4.67        | 6.15             | -0.2300       | 0.1170         | 1.27      |
| 38                  | -7.69        | -2.45        | 2.45             | -0.1864       | 0.1927         | 1.43      |
| 39                  | -7.64        | -2.32        | 2.33             | -0.1830       | 0.1954         | 1.48      |
| 40                  | -6.84        | -0.82        | 1.22             | -0.1407       | 0.2213         | 2.28      |
| 41                  | -6.77        | -1.35        | 1.52             | -0.1493       | 0.1990         | 2.35      |
| 42                  | -6.60        | -1.13        | 1.36             | -0.1420       | 0.2012         | 2.52      |
| 43                  | -6.53        | -1.08        | 1.33             | -0.1398       | 0.2003         | 2.59      |
| 44                  | -7.51        | -2.89        | 2.92             | -0.1910       | 0.1700         | 1.61      |
| 45                  | -7.20        | -1.76        | 1.85             | -0.1646       | 0.1997         | 1.92      |
| 46                  | -7.33        | -2.61        | 2.61             | -0.1825       | 0.1734         | 1.79      |
| 47                  | -6.40        | -0.89        | 1.21             | -0.1339       | 0.2024         | 2.72      |
| 48                  | -6.46        | -1.20        | 1.40             | -0.1409       | 0.1933         | 2.66      |
| 49                  | -6.41        | -1.04        | 1.30             | -0.1370       | 0.1973         | 2.71      |
| 50                  | -6.31        | -1.04        | 1.28             | -0.1351       | 0.1939         | 2.81      |
| 51                  | -7.19        | -2.62        | 2.63             | -0.1801       | 0.1680         | 1.93      |
| 52                  | -6.92        | -1.58        | 1.69             | -0.1562       | 0.1963         | 2.20      |
| 53                  | -7.12        | -2.39        | 2.39             | -0.1747       | 0.1738         | 2.00      |
| 54                  | -6.29        | -0.90        | 1.20             | -0.1321       | 0.1979         | 2.83      |
| 55                  | -8.14        | -3.19        | 3.24             | -0.2082       | 0.1822         | 0.98      |
| 56                  | -7.39        | -1.30        | 1.55             | -0.1597       | 0.2239         | 1.73      |
| 57                  | -6.43        | -1.31        | 1.46             | -0.1423       | 0.1880         | 2.69      |
| 58                  | -6.42        | -1.20        | 1.39             | -0.1399       | 0.1918         | 2.70      |
| 59                  | -6.30        | -1.16        | 1.35             | -0.1370       | 0.1886         | 2.82      |
| 60                  | -7.12        | -2.60        | 2.61             | -0.1786       | 0.1661         | 2.00      |
| 61                  | -6.91        | -1.70        | 1.78             | -0.1582       | 0.1917         | 2.21      |
| 62                  | -7.08        | -2.41        | 2.42             | -0.1745       | 0.1715         | 2.04      |
| 63                  | -6.32        | -1.10        | 1.32             | -0.1364       | 0.1917         | 2.80      |
| 64                  | -6.47        | -1.80        | 1.83             | -0.1519       | 0.1718         | 2.65      |
| 65                  | -6.42        | -1.65        | 1.70             | -0.1482       | 0.1754         | 2.70      |
| 66                  | -6.35        | -1.59        | 1.66             | -0.1459       | 0.1748         | 2.77      |
| 67                  | -7.10        | -3.03        | 3.15             | -0.1861       | 0.1499         | 2.02      |
| 68                  | -6.86        | -2.13        | 2.14             | -0.1653       | 0.1739         | 2.26      |
| 69                  | -7.03        | -2.81        | 2.87             | -0.1808       | 0.1550         | 2.09      |
| 70                  | -6.33        | -1.51        | 1.60             | -0.1441       | 0.1771         | 2.79      |

**Table S2.** Local reactivity indices for all reactants calculated at the B3LYP/6-31G\* level.

|    | $P^*_{C1}$ | $P^*_{C2}$ | $\omega_{C1}$ | $\omega_{C2}$ | $\Delta\omega_k$ |
|----|------------|------------|---------------|---------------|------------------|
| 1  | 0.630      | 0.198      | 1.10          | 0.35          | 0.75             |
| 2  | 0.524      | 0.040      | 0.96          | 0.07          | 0.89             |
| 3  | 0.543      | -0.080     | 1.73          | -0.25         | 1.99             |
| 4  | 0.442      | 0.006      | 1.15          | 0.02          | 1.13             |
| 5  | 0.637      | 0.380      | 0.79          | 0.47          | 0.32             |
| 6  | 0.501      | -0.058     | 0.75          | -0.09         | 0.84             |
| 7  | 0.511      | -0.112     | 1.15          | -0.25         | 1.40             |
| 8  | 0.537      | 0.044      | 1.17          | 0.10          | 1.08             |
| 9  | 0.514      | 0.034      | 0.87          | 0.06          | 0.82             |
| 10 | 0.507      | 0.006      | 0.86          | 0.01          | 0.85             |
| 11 | 0.304      | 0.203      | 0.96          | 0.64          | 0.32             |
| 12 | 0.550      | -0.067     | 1.97          | -0.24         | 2.21             |
| 13 | 0.527      | -0.079     | 1.55          | -0.23         | 1.79             |
| 14 | 0.522      | -0.095     | 1.47          | -0.27         | 1.74             |
| 15 | 0.366      | 0.059      | 1.82          | 0.29          | 1.53             |
| 16 | 0.740      | 0.097      | 2.09          | 0.27          | 1.81             |
| 17 | 0.348      | 0.348      | 1.04          | 1.04          | 0.00             |
| 18 | 0.334      | 0.334      | 1.03          | 1.03          | 0.00             |
| 19 | 0.594      | 0.186      | 0.89          | 0.28          | 0.61             |
| 20 | 0.620      | 0.201      | 0.94          | 0.31          | 0.64             |
| 21 | 0.404      | 0.131      | 1.00          | 0.32          | 0.68             |
| 22 | 0.478      | -0.069     | 0.64          | -0.09         | 0.73             |
| 23 | 0.492      | -0.125     | 1.00          | -0.25         | 1.25             |
| 24 | 0.179      | 0.179      | 0.81          | 0.81          | 0.00             |
| 25 | 0.404      | 0.132      | 1.16          | 0.38          | 0.78             |
| 26 | 0.463      | 0.215      | 2.03          | 0.94          | 1.09             |
| 27 | 0.595      | 0.181      | 0.79          | 0.24          | 0.55             |
| 28 | 0.585      | 0.188      | 0.76          | 0.24          | 0.52             |
| 29 | 0.340      | 0.311      | 0.93          | 0.85          | 0.08             |
| 30 | 0.352      | 0.334      | 0.94          | 0.89          | 0.05             |
| 31 | 0.452      | 0.028      | 0.70          | 0.04          | 0.66             |
| 32 | 0.367      | 0.196      | 1.66          | 0.88          | 0.77             |
| 33 | 0.322      | 0.322      | 1.91          | 1.91          | 0.00             |
| 34 | 0.473      | 0.190      | 1.85          | 0.74          | 1.10             |
| 35 | 0.360      | 0.179      | 1.46          | 0.73          | 0.73             |
| 36 | 0.461      | 0.013      | 0.69          | 0.02          | 0.67             |
| 37 | 0.244      | 0.202      | 1.50          | 1.24          | 0.26             |
| 38 | 0.317      | 0.317      | 0.78          | 0.78          | 0.00             |
| 39 | 0.339      | 0.339      | 0.79          | 0.79          | 0.00             |
| 40 | 0.535      | 0.183      | 0.65          | 0.22          | 0.43             |
| 41 | 0.633      | 0.049      | 0.96          | 0.07          | 0.89             |
| 42 | 0.616      | 0.037      | 0.84          | 0.05          | 0.79             |
| 43 | 0.577      | 0.046      | 0.77          | 0.06          | 0.70             |
| 44 | 0.356      | 0.205      | 1.04          | 0.60          | 0.44             |
| 45 | 0.626      | 0.040      | 1.16          | 0.07          | 1.08             |
| 46 | 0.335      | 0.196      | 0.87          | 0.51          | 0.36             |
| 47 | 0.561      | 0.035      | 0.68          | 0.04          | 0.63             |
| 48 | 0.552      | 0.028      | 0.77          | 0.04          | 0.73             |
| 49 | 0.533      | 0.017      | 0.69          | 0.02          | 0.67             |
| 50 | 0.497      | 0.029      | 0.64          | 0.04          | 0.60             |
| 51 | 0.326      | 0.191      | 0.86          | 0.50          | 0.35             |
| 52 | 0.558      | 0.028      | 0.94          | 0.05          | 0.89             |
| 53 | 0.305      | 0.181      | 0.73          | 0.43          | 0.30             |
| 54 | 0.482      | 0.017      | 0.58          | 0.02          | 0.56             |
| 55 | 0.258      | 0.258      | 0.84          | 0.84          | 0.00             |
| 56 | 0.550      | 0.159      | 0.85          | 0.25          | 0.61             |
| 57 | 0.495      | 0.031      | 0.72          | 0.05          | 0.68             |
| 58 | 0.484      | 0.024      | 0.67          | 0.03          | 0.64             |
| 59 | 0.458      | 0.030      | 0.62          | 0.04          | 0.58             |
| 60 | 0.300      | 0.198      | 0.78          | 0.52          | 0.27             |
| 61 | 0.510      | 0.035      | 0.91          | 0.06          | 0.84             |
| 62 | 0.285      | 0.190      | 0.69          | 0.46          | 0.23             |
| 63 | 0.461      | 0.014      | 0.61          | 0.02          | 0.59             |
| 64 | 0.463      | 0.069      | 0.85          | 0.13          | 0.72             |
| 65 | 0.447      | 0.059      | 0.76          | 0.10          | 0.66             |
| 66 | 0.442      | 0.055      | 0.73          | 0.09          | 0.64             |
| 67 | 0.276      | 0.234      | 0.87          | 0.74          | 0.13             |
| 68 | 0.474      | 0.070      | 1.01          | 0.15          | 0.86             |
| 69 | 0.256      | 0.226      | 0.74          | 0.65          | 0.09             |
| 70 | 0.438      | 0.039      | 0.70          | 0.06          | 0.64             |

**Table S3.** C1 and C2 LUMO  $p_z$  coefficients of compounds **1-70** computed at the B3LYP/6-31G\* level.\*

|    | $p_{zC1}$ | $p_{zC2}$ | $\Delta_{Cpz}$ |
|----|-----------|-----------|----------------|
| 1  | 0.41      | 0.32      | 0.09           |
| 2  | 0.38      | 0.22      | 0.16           |
| 3  | 0.37      | 0.16      | 0.21           |
| 4  | 0.32      | 0.17      | 0.14           |
| 5  | 0.42      | 0.39      | 0.03           |
| 6  | 0.37      | 0.20      | 0.17           |
| 7  | 0.36      | 0.16      | 0.20           |
| 8  | 0.37      | 0.22      | 0.15           |
| 9  | 0.36      | 0.21      | 0.16           |
| 10 | 0.38      | 0.18      | 0.19           |
| 11 | 0.34      | 0.28      | 0.06           |
| 12 | 0.37      | 0.17      | 0.20           |
| 13 | 0.37      | 0.16      | 0.21           |
| 14 | 0.39      | 0.15      | 0.24           |
| 15 | 0.34      | 0.22      | 0.12           |
| 16 | 0.43      | 0.30      | 0.13           |
| 17 | 0.35      | 0.35      | 0.00           |
| 18 | 0.35      | 0.35      | 0.00           |
| 19 | 0.43      | 0.30      | 0.13           |
| 20 | 0.40      | 0.33      | 0.07           |
| 21 | 0.38      | 0.25      | 0.13           |
| 22 | 0.38      | 0.18      | 0.20           |
| 23 | 0.37      | 0.14      | 0.23           |
| 24 | 0.27      | 0.27      | 0.00           |
| 25 | 0.35      | 0.27      | 0.08           |
| 26 | 0.37      | 0.33      | 0.05           |
| 27 | 0.42      | 0.31      | 0.11           |
| 28 | 0.42      | 0.32      | 0.10           |
| 29 | 0.36      | 0.33      | 0.03           |
| 30 | 0.36      | 0.34      | 0.03           |
| 31 | 0.39      | 0.19      | 0.21           |
| 32 | 0.32      | 0.32      | 0.00           |
| 33 | 0.34      | 0.34      | 0.00           |
| 34 | 0.39      | 0.31      | 0.08           |
| 35 | 0.32      | 0.30      | 0.02           |
| 36 | 0.38      | 0.18      | 0.20           |
| 37 | 0.31      | 0.26      | 0.04           |
| 38 | 0.34      | 0.34      | 0.00           |
| 39 | 0.35      | 0.35      | 0.00           |
| 40 | 0.43      | 0.30      | 0.12           |
| 41 | 0.42      | 0.23      | 0.18           |
| 42 | 0.40      | 0.23      | 0.17           |
| 43 | 0.43      | 0.22      | 0.21           |
| 44 | 0.35      | 0.29      | 0.06           |
| 45 | 0.40      | 0.24      | 0.17           |
| 46 | 0.33      | 0.28      | 0.05           |
| 47 | 0.41      | 0.21      | 0.20           |
| 48 | 0.40      | 0.21      | 0.18           |
| 49 | 0.39      | 0.21      | 0.17           |
| 50 | 0.42      | 0.20      | 0.21           |
| 51 | 0.35      | 0.28      | 0.07           |
| 52 | 0.39      | 0.22      | 0.17           |
| 53 | 0.33      | 0.27      | 0.05           |
| 54 | 0.40      | 0.20      | 0.20           |
| 55 | 0.30      | 0.30      | 0.00           |
| 56 | 0.41      | 0.29      | 0.12           |
| 57 | 0.38      | 0.21      | 0.17           |
| 58 | 0.36      | 0.20      | 0.16           |
| 59 | 0.39      | 0.20      | 0.19           |
| 60 | 0.34      | 0.27      | 0.07           |
| 61 | 0.37      | 0.22      | 0.16           |
| 62 | 0.32      | 0.27      | 0.05           |
| 63 | 0.38      | 0.19      | 0.19           |
| 64 | 0.34      | 0.21      | 0.13           |
| 65 | 0.34      | 0.21      | 0.13           |
| 66 | 0.36      | 0.20      | 0.16           |
| 67 | 0.31      | 0.28      | 0.04           |
| 68 | 0.36      | 0.23      | 0.12           |
| 69 | 0.30      | 0.28      | 0.02           |
| 70 | 0.36      | 0.20      | 0.16           |

\* Here, C1 is arbitrarily defined as the atom with highest  $2p_z$  value.

**Table S4.** C1-C6 and C2-C3 bond forming distances (see Figure S1), asynchronicity ( $\Delta d$ ) and charge transfer for all transition structures computed for the DA reactions between **1-70** and **CP** at the B3LYP/6-31G\* level.

|          | $d_{C1C6}$ (Å) | $d_{C2C3}$ (Å) | $\Delta d$ (Å) | CT (e) |
|----------|----------------|----------------|----------------|--------|
| TS-1+CP  | 2.07           | 2.47           | 0.40           | 0.15   |
| TS-2+CP  | 2.07           | 2.46           | 0.39           | 0.15   |
| TS-3+CP  | 2.01           | 2.66           | 0.65           | 0.26   |
| TS-4+CP  | 2.05           | 2.56           | 0.51           | 0.20   |
| TS-5+CP  | 2.20           | 2.31           | 0.11           | 0.11   |
| TS-6+CP  | 2.07           | 2.51           | 0.44           | 0.13   |
| TS-7+CP  | 2.03           | 2.62           | 0.59           | 0.21   |
| TS-8+CP  | 2.00           | 2.61           | 0.60           | 0.19   |
| TS-9+CP  | 2.02           | 2.53           | 0.51           | 0.14   |
| TS-10+CP | 2.09           | 2.41           | 0.32           | 0.14   |
| TS-11+CP | 2.20           | 2.24           | 0.04           | 0.23   |
| TS-12+CP | 1.98           | 2.85           | 0.88           | 0.30   |
| TS-13+CP | 1.97           | 2.73           | 0.76           | 0.25   |
| TS-14+CP | 2.00           | 2.60           | 0.60           | 0.26   |
| TS-15+CP | 2.06           | 2.41           | 0.35           | 0.32   |
| TS-16+CP | 1.99           | 2.80           | 0.81           | 0.28   |
| TS-17+CP | 2.23           | 2.23           | 0.00           | 0.24   |
| TS-18+CP | 2.22           | 2.25           | 0.03           | 0.25   |
| TS-19+CP | 2.10           | 2.42           | 0.32           | 0.14   |
| TS-20+CP | 2.05           | 2.52           | 0.48           | 0.14   |
| TS-21+CP | 2.15           | 2.38           | 0.23           | 0.20   |
| TS-22+CP | 2.07           | 2.47           | 0.40           | 0.13   |
| TS-23+CP | 2.03           | 2.58           | 0.55           | 0.20   |
| TS-24+CP | 2.25           | 2.29           | 0.03           | 0.28   |
| TS-25+CP | 2.05           | 2.45           | 0.40           | 0.24   |
| TS-26+CP | 2.00           | 2.61           | 0.61           | 0.36   |
| TS-27+CP | 2.06           | 2.47           | 0.41           | 0.13   |
| TS-28+CP | 2.08           | 2.46           | 0.38           | 0.13   |
| TS-29+CP | 2.17           | 2.30           | 0.14           | 0.23   |
| TS-30+CP | 2.19           | 2.28           | 0.09           | 0.23   |
| TS-31+CP | 2.13           | 2.35           | 0.22           | 0.13   |
| TS-32+CP | 1.96           | 2.60           | 0.64           | 0.34   |
| TS-33+CP | 2.20           | 2.20           | 0.00           | 0.43   |
| TS-34+CP | 2.00           | 2.55           | 0.55           | 0.36   |
| TS-35+CP | 1.97           | 2.49           | 0.52           | 0.33   |
| TS-36+CP | 2.06           | 2.46           | 0.41           | 0.12   |
| TS-37+CP | 2.08           | 2.27           | 0.19           | 0.37   |
| TS-38+CP | 2.20           | 2.26           | 0.06           | 0.22   |
| TS-39+CP | 2.23           | 2.23           | 0.00           | 0.22   |
| TS-40+CP | 2.10           | 2.42           | 0.32           | 0.13   |
| TS-41+CP | 2.10           | 2.44           | 0.34           | 0.13   |
| TS-42+CP | 2.07           | 2.51           | 0.45           | 0.12   |
| TS-43+CP | 2.13           | 2.38           | 0.25           | 0.13   |
| TS-44+CP | 2.18           | 2.30           | 0.12           | 0.22   |
| TS-45+CP | 2.02           | 2.64           | 0.62           | 0.18   |
| TS-46+CP | 2.23           | 2.25           | 0.02           | 0.21   |
| TS-47+CP | 2.10           | 2.44           | 0.35           | 0.12   |
| TS-48+CP | 2.07           | 2.40           | 0.33           | 0.12   |
| TS-49+CP | 2.03           | 2.48           | 0.45           | 0.11   |
| TS-50+CP | 2.10           | 2.34           | 0.24           | 0.12   |
| TS-51+CP | 2.14           | 2.27           | 0.12           | 0.21   |
| TS-52+CP | 2.00           | 2.53           | 0.53           | 0.17   |
| TS-53+CP | 2.20           | 2.21           | 0.01           | 0.20   |
| TS-54+CP | 2.06           | 2.41           | 0.35           | 0.11   |
| TS-55+CP | 2.22           | 2.22           | 0.00           | 0.23   |
| TS-56+CP | 2.11           | 2.35           | 0.24           | 0.13   |
| TS-57+CP | 2.08           | 2.37           | 0.28           | 0.12   |
| TS-58+CP | 2.04           | 2.43           | 0.39           | 0.12   |
| TS-59+CP | 2.13           | 2.31           | 0.18           | 0.12   |
| TS-60+CP | 2.11           | 2.29           | 0.18           | 0.21   |
| TS-61+CP | 2.01           | 2.50           | 0.48           | 0.17   |
| TS-62+CP | 2.15           | 2.26           | 0.12           | 0.20   |
| TS-63+CP | 2.09           | 2.37           | 0.28           | 0.11   |
| TS-64+CP | 2.08           | 2.43           | 0.36           | 0.17   |
| TS-65+CP | 2.03           | 2.50           | 0.47           | 0.16   |
| TS-66+CP | 2.10           | 2.36           | 0.27           | 0.17   |
| TS-67+CP | 2.15           | 2.29           | 0.15           | 0.25   |
| TS-68+CP | 2.00           | 2.59           | 0.59           | 0.22   |
| TS-69+CP | 2.18           | 2.24           | 0.06           | 0.24   |
| TS-70+CP | 2.06           | 2.44           | 0.38           | 0.16   |



**Table S5.** C1-C6 and C2-C3 bond forming distances (see Figure S1), asynchronicity ( $\Delta d$ ) and charge transfer for all transition structures computed for the DA reactions between **1-70** and **CH** at the B3LYP/6-31G\* level.

|          | $d_{C1C6}$ (Å) | $d_{C2C3}$ (Å) | $\Delta d$ (Å) | CT (e) |
|----------|----------------|----------------|----------------|--------|
| TS-1+CH  | 2.11           | 2.50           | 0.39           | 0.14   |
| TS-2+CH  | 2.10           | 2.52           | 0.43           | 0.14   |
| TS-3+CH  | 2.01           | 2.78           | 0.77           | 0.28   |
| TS-4+CH  | 2.08           | 2.56           | 0.48           | 0.20   |
| TS-5+CH  | 2.23           | 2.35           | 0.12           | 0.10   |
| TS-6+CH  | 2.09           | 2.60           | 0.51           | 0.13   |
| TS-7+CH  | 2.05           | 2.70           | 0.66           | 0.21   |
| TS-8+CH  | 1.99           | 2.80           | 0.81           | 0.20   |
| TS-9+CH  | 2.04           | 2.64           | 0.60           | 0.14   |
| TS-10+CH | 2.02           | 2.67           | 0.65           | 0.17   |
| TS-11+CH | 2.24           | 2.29           | 0.05           | 0.23   |
| TS-12+CH | 1.97           | 3.10           | 1.13           | 0.33   |
| TS-13+CH | 1.98           | 2.91           | 0.94           | 0.27   |
| TS-14+CH | 1.99           | 2.76           | 0.77           | 0.29   |
| TS-15+CH | 2.10           | 2.49           | 0.40           | 0.34   |
| TS-16+CH | 1.95           | 3.07           | 1.12           | 0.30   |
| TS-17+CH | 2.27           | 2.27           | 0.00           | 0.24   |
| TS-18+CH | 2.21           | 2.35           | 0.14           | 0.25   |
| TS-19+CH | 2.16           | 2.42           | 0.26           | 0.14   |
| TS-20+CH | 2.05           | 2.61           | 0.55           | 0.14   |
| TS-21+CH | 2.22           | 2.38           | 0.16           | 0.20   |
| TS-22+CH | 2.09           | 2.58           | 0.49           | 0.13   |
| TS-23+CH | 2.04           | 2.68           | 0.64           | 0.21   |
| TS-24+CH | 2.26           | 2.37           | 0.11           | 0.30   |
| TS-25+CH | 2.09           | 2.46           | 0.37           | 0.24   |
| TS-26+CH | 1.98           | 2.83           | 0.85           | 0.39   |
| TS-27+CH | 2.07           | 2.56           | 0.50           | 0.13   |
| TS-28+CH | 2.10           | 2.52           | 0.42           | 0.13   |
| TS-29+CH | 2.18           | 2.39           | 0.21           | 0.23   |
| TS-30+CH | 2.19           | 2.36           | 0.17           | 0.23   |
| TS-31+CH | 2.10           | 2.49           | 0.39           | 0.15   |
| TS-32+CH | 1.96           | 2.75           | 0.79           | 0.36   |
| TS-33+CH | 2.26           | 2.26           | 0.00           | 0.46   |
| TS-34+CH | 2.00           | 2.71           | 0.71           | 0.39   |
| TS-35+CH | 2.03           | 2.54           | 0.52           | 0.34   |
| TS-36+CH | 2.07           | 2.56           | 0.49           | 0.13   |
| TS-37+CH | 2.23           | 2.24           | 0.01           | 0.40   |
| TS-38+CH | 2.25           | 2.30           | 0.05           | 0.23   |
| TS-39+CH | 2.28           | 2.28           | 0.00           | 0.23   |
| TS-40+CH | 2.13           | 2.47           | 0.34           | 0.13   |
| TS-41+CH | 2.14           | 2.47           | 0.34           | 0.12   |
| TS-42+CH | 2.07           | 2.62           | 0.55           | 0.12   |
| TS-43+CH | 2.18           | 2.41           | 0.23           | 0.12   |
| TS-44+CH | 2.21           | 2.37           | 0.15           | 0.22   |
| TS-45+CH | 2.00           | 2.86           | 0.86           | 0.18   |
| TS-46+CH | 2.25           | 2.32           | 0.07           | 0.21   |
| TS-47+CH | 2.10           | 2.55           | 0.45           | 0.12   |
| TS-48+CH | 2.11           | 2.43           | 0.32           | 0.12   |
| TS-49+CH | 2.04           | 2.57           | 0.53           | 0.11   |
| TS-50+CH | 2.18           | 2.35           | 0.17           | 0.11   |
| TS-51+CH | 2.17           | 2.36           | 0.19           | 0.21   |
| TS-52+CH | 1.98           | 2.74           | 0.76           | 0.17   |
| TS-53+CH | 2.22           | 2.29           | 0.07           | 0.20   |
| TS-54+CH | 2.08           | 2.52           | 0.44           | 0.11   |
| TS-55+CH | 2.27           | 2.27           | 0.00           | 0.23   |
| TS-56+CH | 2.16           | 2.38           | 0.21           | 0.13   |
| TS-57+CH | 2.11           | 2.43           | 0.31           | 0.12   |
| TS-58+CH | 2.04           | 2.57           | 0.52           | 0.12   |
| TS-59+CH | 2.20           | 2.32           | 0.12           | 0.12   |
| TS-60+CH | 2.15           | 2.37           | 0.21           | 0.21   |
| TS-61+CH | 1.98           | 2.73           | 0.76           | 0.18   |
| TS-62+CH | 2.24           | 2.27           | 0.03           | 0.21   |
| TS-63+CH | 2.08           | 2.53           | 0.45           | 0.12   |
| TS-64+CH | 2.11           | 2.47           | 0.36           | 0.16   |
| TS-65+CH | 2.03           | 2.63           | 0.59           | 0.16   |
| TS-66+CH | 2.18           | 2.36           | 0.18           | 0.16   |
| TS-67+CH | 2.16           | 2.38           | 0.22           | 0.26   |
| TS-68+CH | 1.94           | 2.88           | 0.94           | 0.23   |
| TS-69+CH | 2.23           | 2.29           | 0.06           | 0.25   |
| TS-70+CH | 2.05           | 2.58           | 0.53           | 0.17   |



**Table S6.** C1-C6 and C2-C3 bond forming distances (see Figure S1), asynchronicity ( $\Delta d$ ) and charge transfer for all transition structures computed for the DA reactions between **1-70** and **BU** at the B3LYP/6-31G\* level.

|          | $d_{C1C6}$ (Å) | $d_{C2C3}$ (Å) | $\Delta d$ (Å) | CT (e) |
|----------|----------------|----------------|----------------|--------|
| TS-1+BU  | 2.11           | 2.49           | 0.38           | 0.12   |
| TS-2+BU  | 2.09           | 2.52           | 0.43           | 0.12   |
| TS-3+BU  | 2.02           | 2.75           | 0.73           | 0.23   |
| TS-4+BU  | 2.10           | 2.52           | 0.42           | 0.16   |
| TS-5+BU  | 2.23           | 2.34           | 0.11           | 0.08   |
| TS-6+BU  | 2.10           | 2.59           | 0.49           | 0.11   |
| TS-7+BU  | 2.07           | 2.68           | 0.61           | 0.17   |
| TS-8+BU  | 2.00           | 2.74           | 0.74           | 0.16   |
| TS-9+BU  | 2.04           | 2.64           | 0.60           | 0.10   |
| TS-10+BU | 2.13           | 2.44           | 0.31           | 0.10   |
| TS-11+BU | 2.23           | 2.28           | 0.06           | 0.19   |
| TS-12+BU | 2.02           | 2.91           | 0.89           | 0.26   |
| TS-13+BU | 2.02           | 2.83           | 0.81           | 0.22   |
| TS-14+BU | 2.01           | 2.70           | 0.69           | 0.23   |
| TS-15+BU | 2.10           | 2.47           | 0.37           | 0.29   |
| TS-16+BU | 1.98           | 2.86           | 0.88           | 0.24   |
| TS-17+BU | 2.26           | 2.26           | 0.00           | 0.21   |
| TS-18+BU | 2.21           | 2.33           | 0.12           | 0.21   |
| TS-19+BU | 2.14           | 2.41           | 0.26           | 0.10   |
| TS-20+BU | 2.06           | 2.57           | 0.52           | 0.11   |
| TS-21+BU | 2.20           | 2.38           | 0.17           | 0.16   |
| TS-22+BU | 2.10           | 2.56           | 0.47           | 0.10   |
| TS-23+BU | 2.06           | 2.63           | 0.58           | 0.17   |
| TS-24+BU | 2.25           | 2.35           | 0.10           | 0.24   |
| TS-25+BU | 2.09           | 2.45           | 0.36           | 0.20   |
| TS-26+BU | 2.00           | 2.67           | 0.67           | 0.32   |
| TS-27+BU | 2.07           | 2.53           | 0.46           | 0.09   |
| TS-28+BU | 2.09           | 2.49           | 0.39           | 0.10   |
| TS-29+BU | 2.19           | 2.35           | 0.16           | 0.19   |
| TS-30+BU | 2.20           | 2.33           | 0.13           | 0.20   |
| TS-31+BU | 2.15           | 2.41           | 0.26           | 0.10   |
| TS-32+BU | 2.00           | 2.62           | 0.62           | 0.29   |
| TS-33+BU | 2.25           | 2.25           | 0.00           | 0.39   |
| TS-34+BU | 2.03           | 2.57           | 0.54           | 0.32   |
| TS-35+BU | 2.05           | 2.46           | 0.42           | 0.28   |
| TS-36+BU | 2.06           | 2.56           | 0.51           | 0.09   |
| TS-37+BU | 2.17           | 2.28           | 0.11           | 0.34   |
| TS-38+BU | 2.25           | 2.27           | 0.01           | 0.18   |
| TS-39+BU | 2.26           | 2.26           | 0.00           | 0.19   |
| TS-40+BU | 2.10           | 2.48           | 0.38           | 0.09   |
| TS-41+BU | 2.13           | 2.50           | 0.37           | 0.10   |
| TS-42+BU | 2.06           | 2.63           | 0.57           | 0.09   |
| TS-43+BU | 2.18           | 2.40           | 0.22           | 0.10   |
| TS-44+BU | 2.23           | 2.33           | 0.10           | 0.18   |
| TS-45+BU | 2.02           | 2.75           | 0.73           | 0.14   |
| TS-46+BU | 2.22           | 2.34           | 0.12           | 0.17   |
| TS-47+BU | 2.09           | 2.55           | 0.46           | 0.09   |
| TS-48+BU | 2.11           | 2.43           | 0.33           | 0.09   |
| TS-49+BU | 2.02           | 2.58           | 0.56           | 0.08   |
| TS-50+BU | 2.16           | 2.36           | 0.20           | 0.09   |
| TS-51+BU | 2.18           | 2.32           | 0.15           | 0.17   |
| TS-52+BU | 1.98           | 2.66           | 0.67           | 0.14   |
| TS-53+BU | 2.19           | 2.30           | 0.11           | 0.16   |
| TS-54+BU | 2.05           | 2.52           | 0.46           | 0.08   |
| TS-55+BU | 2.27           | 2.27           | 0.00           | 0.20   |
| TS-56+BU | 2.15           | 2.38           | 0.22           | 0.10   |
| TS-57+BU | 2.09           | 2.45           | 0.36           | 0.10   |
| TS-58+BU | 2.01           | 2.61           | 0.60           | 0.09   |
| TS-59+BU | 2.16           | 2.36           | 0.20           | 0.09   |
| TS-60+BU | 2.17           | 2.32           | 0.16           | 0.17   |
| TS-61+BU | 1.95           | 2.70           | 0.76           | 0.14   |
| TS-62+BU | 2.16           | 2.32           | 0.15           | 0.16   |
| TS-63+BU | 2.02           | 2.57           | 0.55           | 0.09   |
| TS-64+BU | 2.10           | 2.48           | 0.39           | 0.14   |
| TS-65+BU | 2.02           | 2.63           | 0.61           | 0.13   |
| TS-66+BU | 2.15           | 2.39           | 0.24           | 0.13   |
| TS-67+BU | 2.19           | 2.33           | 0.13           | 0.22   |
| TS-68+BU | 2.00           | 2.75           | 0.75           | 0.19   |
| TS-69+BU | 2.18           | 2.31           | 0.13           | 0.21   |
| TS-70+BU | 2.02           | 2.58           | 0.56           | 0.14   |

**Table S7.** C1-C6 and C2-C3 bond forming distances (Figure S1), asynchronicity ( $\Delta d$ ) and charge transfer for all transition structures computed for the DA reactions between **1-70** and **DMB** at the B3LYP/6-31G\* level.\*

|           | $d_{C1C6}$ (Å) | $d_{C2C3}$ (Å) | $\Delta d$ (Å) | CT (e) |
|-----------|----------------|----------------|----------------|--------|
| TS-1+DMB  | 2.07           | 2.52           | 0.44           | 0.15   |
| TS-2+DMB  | 2.07           | 2.55           | 0.49           | 0.14   |
| TS-3+DMB  | 2.01           | 2.81           | 0.81           | 0.27   |
| TS-4+DMB  | 2.04           | 2.64           | 0.61           | 0.21   |
| TS-5+DMB  | 2.21           | 2.35           | 0.14           | 0.10   |
| TS-6+DMB  | 2.08           | 2.60           | 0.52           | 0.13   |
| TS-7+DMB  | 2.05           | 2.71           | 0.66           | 0.20   |
| TS-8+DMB  | 1.99           | 2.76           | 0.77           | 0.19   |
| TS-9+DMB  | 2.02           | 2.67           | 0.66           | 0.13   |
| TS-10+DMB | 2.10           | 2.47           | 0.37           | 0.13   |
| TS-11+DMB | 2.24           | 2.26           | 0.02           | 0.22   |
| TS-12+DMB | 2.03           | 2.93           | 0.90           | 0.29   |
| TS-13+DMB | 2.02           | 2.86           | 0.84           | 0.25   |
| TS-14+DMB | 2.00           | 2.76           | 0.76           | 0.28   |
| TS-15+DMB | 2.06           | 2.54           | 0.48           | 0.34   |
| TS-16+DMB | 1.98           | 2.89           | 0.91           | 0.28   |
| TS-17+DMB | 2.25           | 2.25           | 0.00           | 0.24   |
| TS-18+DMB | 2.21           | 2.31           | 0.11           | 0.24   |
| TS-19+DMB | 2.11           | 2.43           | 0.33           | 0.13   |
| TS-20+DMB | 2.04           | 2.59           | 0.55           | 0.14   |
| TS-21+DMB | 2.17           | 2.40           | 0.23           | 0.19   |
| TS-22+DMB | 2.08           | 2.57           | 0.49           | 0.12   |
| TS-23+DMB | 2.04           | 2.67           | 0.63           | 0.20   |
| TS-24+DMB | 2.25           | 2.34           | 0.09           | 0.28   |
| TS-25+DMB | 2.05           | 2.51           | 0.47           | 0.25   |
| TS-26+DMB | 1.99           | 2.73           | 0.74           | 0.37   |
| TS-27+DMB | 2.06           | 2.54           | 0.48           | 0.12   |
| TS-28+DMB | 2.07           | 2.51           | 0.44           | 0.13   |
| TS-29+DMB | 2.17           | 2.34           | 0.17           | 0.22   |
| TS-30+DMB | 2.19           | 2.32           | 0.13           | 0.23   |
| TS-31+DMB | 2.13           | 2.42           | 0.29           | 0.12   |
| TS-32+DMB | 1.97           | 2.69           | 0.72           | 0.35   |
| TS-33+DMB | 2.24           | 2.24           | 0.00           | 0.44   |
| TS-34+DMB | 1.99           | 2.65           | 0.66           | 0.37   |
| TS-35+DMB | 2.00           | 2.52           | 0.52           | 0.33   |
| TS-36+DMB | 2.04           | 2.58           | 0.53           | 0.12   |
| TS-37+DMB | 2.14           | 2.31           | 0.17           | 0.39   |
| TS-38+DMB | 2.23           | 2.27           | 0.04           | 0.21   |
| TS-39+DMB | 2.25           | 2.25           | 0.00           | 0.22   |
| TS-40+DMB | 2.09           | 2.48           | 0.39           | 0.12   |
| TS-41+DMB | 2.10           | 2.52           | 0.42           | 0.13   |
| TS-42+DMB | 2.04           | 2.68           | 0.64           | 0.12   |
| TS-43+DMB | 2.16           | 2.41           | 0.25           | 0.12   |
| TS-44+DMB | 2.20           | 2.34           | 0.14           | 0.21   |
| TS-45+DMB | 2.01           | 2.81           | 0.79           | 0.17   |
| TS-46+DMB | 2.21           | 2.34           | 0.13           | 0.20   |
| TS-47+DMB | 2.07           | 2.58           | 0.51           | 0.12   |
| TS-48+DMB | 2.08           | 2.46           | 0.37           | 0.12   |
| TS-49+DMB | 2.01           | 2.60           | 0.60           | 0.11   |
| TS-50+DMB | 2.14           | 2.37           | 0.23           | 0.11   |
| TS-51+DMB | 2.16           | 2.33           | 0.18           | 0.20   |
| TS-52+DMB | 1.96           | 2.70           | 0.74           | 0.17   |
| TS-53+DMB | 2.19           | 2.29           | 0.10           | 0.19   |
| TS-54+DMB | 2.04           | 2.53           | 0.50           | 0.11   |
| TS-55+DMB | 2.25           | 2.25           | 0.00           | 0.23   |
| TS-56+DMB | 2.13           | 2.39           | 0.27           | 0.13   |
| TS-57+DMB | 2.08           | 2.46           | 0.38           | 0.12   |
| TS-58+DMB | 1.99           | 2.64           | 0.65           | 0.11   |
| TS-59+DMB | 2.15           | 2.36           | 0.21           | 0.11   |
| TS-60+DMB | 2.14           | 2.34           | 0.20           | 0.20   |
| TS-61+DMB | 1.94           | 2.74           | 0.80           | 0.17   |
| TS-62+DMB | 2.17           | 2.31           | 0.14           | 0.19   |
| TS-63+DMB | 2.02           | 2.57           | 0.55           | 0.11   |
| TS-64+DMB | 2.08           | 2.50           | 0.42           | 0.17   |
| TS-65+DMB | 2.01           | 2.64           | 0.63           | 0.16   |
| TS-66+DMB | 2.13           | 2.40           | 0.27           | 0.16   |
| TS-67+DMB | 2.17           | 2.34           | 0.17           | 0.24   |
| TS-68+DMB | 1.97           | 2.77           | 0.80           | 0.22   |
| TS-69+DMB | 2.18           | 2.31           | 0.12           | 0.23   |
| TS-70+DMB | 2.02           | 2.58           | 0.56           | 0.16   |

The synchronicity<sup>12</sup> of a concerted reaction can be quantified in different manners:

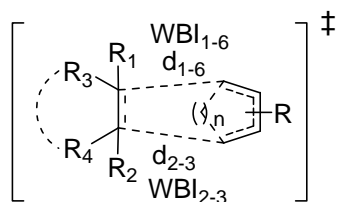

- Using the difference in the lengths of the two bonds forming ( $\Delta d = d_{2-3} - d_{1-6}$ ).
- Using the difference in the Wiberg bond indices (WBI) of the two bonds forming ( $\Delta_{\text{WBI}} = \text{WBI}_{1-6} - \text{WBI}_{2-3}$ ).
- Using the method developed by Moyano and co-workers,<sup>13</sup> as follows:

$$S_y = 1 - \frac{\sum_{i=1}^n \frac{|\delta B_i - \delta B_{\text{av}}|}{\delta B_{\text{av}}}}{2n-2}$$

Where  $n$  is the number of bonds directly involved in the reaction (in this case,  $n = 6$ ) and  $\delta B_i$  stands for the relative variation of a given bond index  $B_i$  at the transition structure (TS) according to

$$\delta B_i = \frac{B_i^{\text{TS}} - B_i^{\text{R}}}{B_i^{\text{P}} - B_i^{\text{R}}}$$

where the superscripts R and P refer to the reactants and the product, respectively. The average value of  $\delta B_i$ , denoted as  $\delta B_{\text{av}}$  is therefore

$$\delta B_{\text{av}} = n^{-1} \sum_{i=1}^n \delta B_i$$

<sup>12</sup> a) Dewar, M. J. S. *J. Am. Chem. Soc.* **1984**, *106*, 209. b) Borden, W. T.; Loncharich, R. J.; Houk, K. N. *Annu. Rev. Phys. Chem.* **1988**, *39*, 213. c) Leroy, G.; Sana, M. *Tetrahedron* **1975**, *31*, 2091.

<sup>13</sup> Moyano, A.; Pericás, M. A.; Valentí, E. *J. Org. Chem.* **1989**, *54*, 573.

**Table S8.** Different measurements of asynchronicity all transition structures computed for the DA reactions between **1-70** and **CP** at the B3LYP/6-31G\* level.

|          | $\Delta d$ (Å) | $\Delta_{WBI}$ | Sy   |
|----------|----------------|----------------|------|
| TS-1+CP  | 0.40           | 0.19           | 0.89 |
| TS-2+CP  | 0.39           | 0.21           | 0.88 |
| TS-3+CP  | 0.65           | 0.33           | 0.82 |
| TS-4+CP  | 0.51           | 0.25           | 0.83 |
| TS-5+CP  | 0.11           | 0.06           | 0.93 |
| TS-6+CP  | 0.44           | 0.22           | 0.88 |
| TS-7+CP  | 0.59           | 0.29           | 0.84 |
| TS-8+CP  | 0.60           | 0.30           | 0.84 |
| TS-9+CP  | 0.51           | 0.26           | 0.87 |
| TS-10+CP | 0.32           | 0.18           | 0.90 |
| TS-11+CP | 0.04           | 0.00           | 0.92 |
| TS-12+CP | 0.88           | 0.41           | 0.78 |
| TS-13+CP | 0.76           | 0.38           | 0.81 |
| TS-14+CP | 0.60           | 0.32           | 0.84 |
| TS-15+CP | 0.35           | 0.21           | 0.90 |
| TS-16+CP | 0.81           | 0.36           | 0.79 |
| TS-17+CP | 0.00           | 0.00           | 0.93 |
| TS-18+CP | 0.03           | 0.01           | 0.92 |
| TS-19+CP | 0.32           | 0.16           | 0.91 |
| TS-20+CP | 0.48           | 0.22           | 0.88 |
| TS-21+CP | 0.23           | 0.14           | 0.91 |
| TS-22+CP | 0.40           | 0.21           | 0.90 |
| TS-23+CP | 0.55           | 0.28           | 0.86 |
| TS-24+CP | 0.03           | 0.01           | 0.90 |
| TS-25+CP | 0.40           | 0.20           | 0.89 |
| TS-26+CP | 0.61           | 0.29           | 0.85 |
| TS-27+CP | 0.41           | 0.20           | 0.89 |
| TS-28+CP | 0.38           | 0.19           | 0.90 |
| TS-29+CP | 0.14           | 0.06           | 0.93 |
| TS-30+CP | 0.09           | 0.04           | 0.93 |
| TS-31+CP | 0.22           | 0.13           | 0.92 |
| TS-32+CP | 0.64           | 0.30           | 0.84 |
| TS-33+CP | 0.00           | 0.00           | 0.92 |
| TS-34+CP | 0.55           | 0.28           | 0.86 |
| TS-35+CP | 0.52           | 0.27           | 0.87 |
| TS-36+CP | 0.41           | 0.21           | 0.90 |
| TS-37+CP | 0.19           | 0.10           | 0.92 |
| TS-38+CP | 0.06           | 0.02           | 0.93 |
| TS-39+CP | 0.00           | 0.00           | 0.93 |
| TS-40+CP | 0.32           | 0.16           | 0.91 |
| TS-41+CP | 0.34           | 0.18           | 0.88 |
| TS-42+CP | 0.45           | 0.23           | 0.86 |
| TS-43+CP | 0.25           | 0.14           | 0.90 |
| TS-44+CP | 0.12           | 0.04           | 0.92 |
| TS-45+CP | 0.62           | 0.30           | 0.81 |
| TS-46+CP | 0.02           | 0.01           | 0.92 |
| TS-47+CP | 0.35           | 0.19           | 0.88 |
| TS-48+CP | 0.33           | 0.18           | 0.89 |
| TS-49+CP | 0.45           | 0.23           | 0.87 |
| TS-50+CP | 0.24           | 0.14           | 0.92 |
| TS-51+CP | 0.12           | 0.04           | 0.93 |
| TS-52+CP | 0.53           | 0.27           | 0.85 |
| TS-53+CP | 0.01           | 0.01           | 0.93 |
| TS-54+CP | 0.35           | 0.19           | 0.90 |
| TS-55+CP | 0.00           | 0.00           | 0.92 |
| TS-56+CP | 0.24           | 0.13           | 0.91 |
| TS-57+CP | 0.28           | 0.17           | 0.90 |
| TS-58+CP | 0.39           | 0.22           | 0.88 |
| TS-59+CP | 0.18           | 0.12           | 0.92 |
| TS-60+CP | 0.18           | 0.07           | 0.93 |
| TS-61+CP | 0.48           | 0.26           | 0.86 |
| TS-62+CP | 0.12           | 0.04           | 0.93 |
| TS-63+CP | 0.28           | 0.16           | 0.91 |
| TS-64+CP | 0.36           | 0.19           | 0.88 |
| TS-65+CP | 0.47           | 0.24           | 0.86 |
| TS-66+CP | 0.27           | 0.16           | 0.90 |
| TS-67+CP | 0.15           | 0.06           | 0.92 |
| TS-68+CP | 0.59           | 0.30           | 0.83 |
| TS-69+CP | 0.06           | 0.02           | 0.93 |
| TS-70+CP | 0.38           | 0.21           | 0.88 |

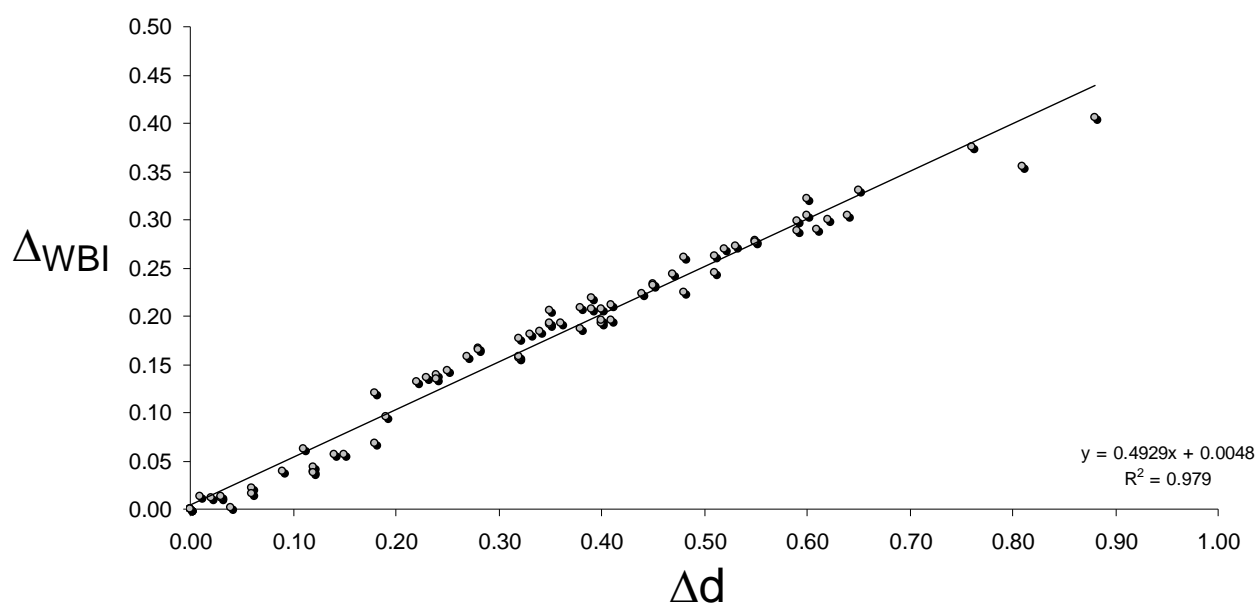

**Figure S2.** Plot of  $\Delta_{WBI}$  versus  $\Delta d$  correspondig to the reactions between **1-70** and **CP**.

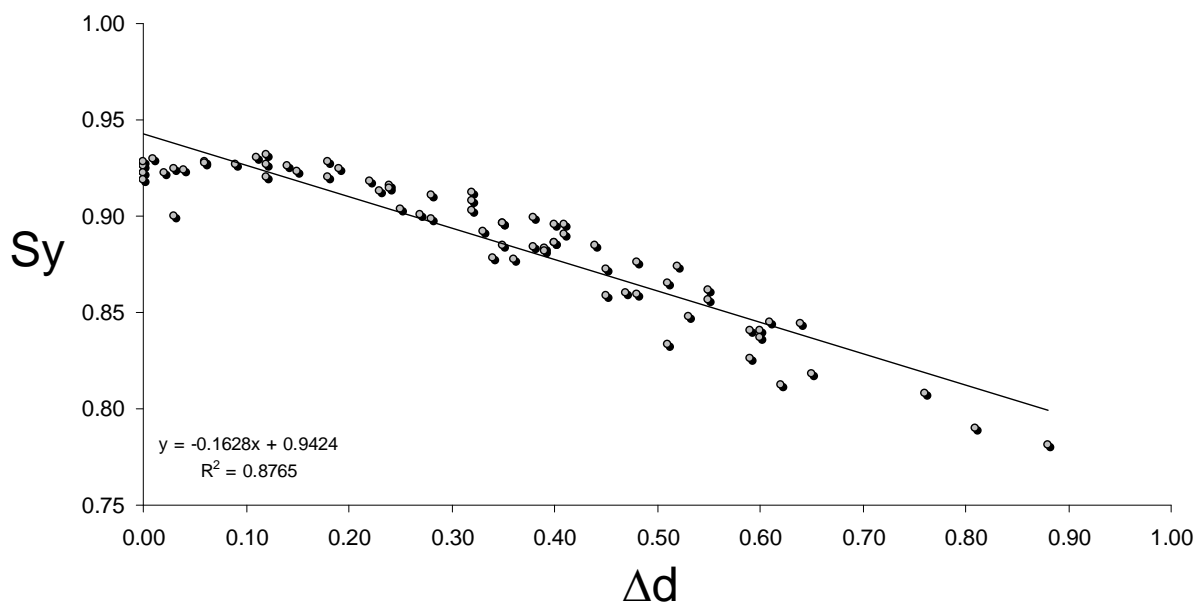

**Figure S3.** Plot of  $Sy$  versus  $\Delta d$  correspondig to the reactions between **1-70** and **CP**.

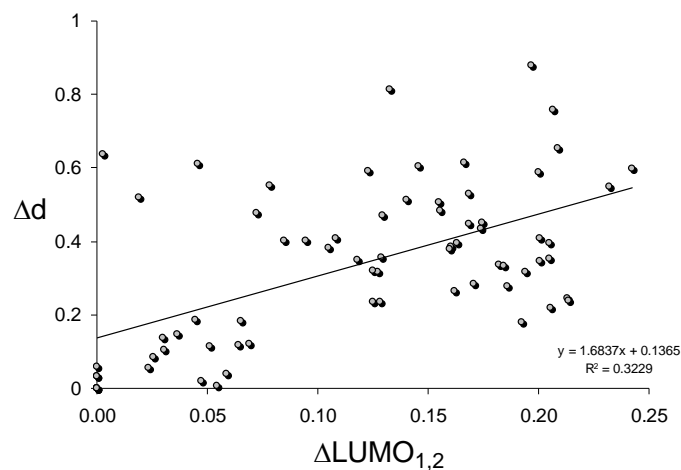

**Figure S4.** Plot of  $\Delta d$  versus  $\Delta LUMO_{1,2}$  corresponding to the reactions between **1-70** and **CP**.

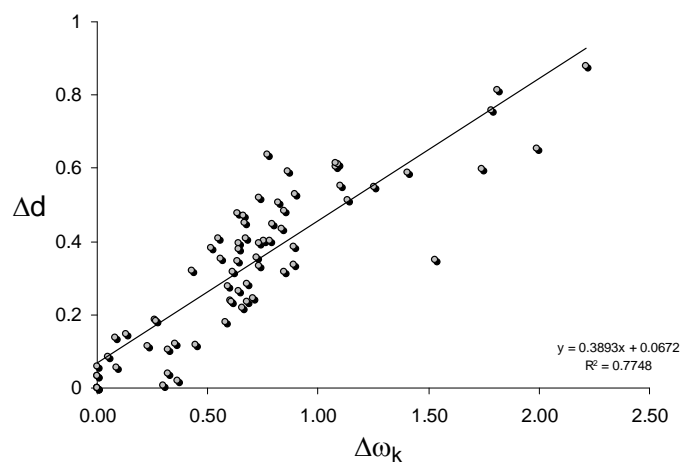

**Figure S5.** Plot of  $\Delta d$  versus  $\Delta \omega_k$  corresponding to the reactions between **1-70** and **CP**.

**Table S9.** B3LYP/6-31G\* energies (E), zero-point corrected energies (ZPE), enthalpies (H) and Gibbs free energies (G) computed for compounds **CP**, **CH**, **BU** and **DMB** (in au).

|            | E           | ZPE         | H           | G           |
|------------|-------------|-------------|-------------|-------------|
| <b>CP</b>  | -194.101058 | -194.008165 | -194.003079 | -194.034762 |
| <b>CH</b>  | -233.418936 | -233.296106 | -233.289989 | -233.324356 |
| <b>BU</b>  | -155.992144 | -155.906655 | -155.901065 | -155.933101 |
| <b>DMB</b> | -234.626780 | -234.484039 | -234.476042 | -234.514358 |

**Table S10.**  $\Delta d$  values computed for the DA reactions between **1-70** and **CP** at the B3LYP/6-31G\* level,  $\Delta d$  values estimated from  $\Delta\omega_k$  ( $0.39^* \Delta\omega_k + 0.07$ ), and difference between both values.

|          | $\Delta d$ (Å) | $0.39 \cdot \Delta\omega_k + 0.07$ | Difference |
|----------|----------------|------------------------------------|------------|
| TS-1+CP  | 0.40           | 0.36                               | 0.04       |
| TS-2+CP  | 0.39           | 0.42                               | -0.03      |
| TS-3+CP  | 0.65           | 0.85                               | -0.20      |
| TS-4+CP  | 0.51           | 0.51                               | 0.00       |
| TS-5+CP  | 0.11           | 0.19                               | -0.08      |
| TS-6+CP  | 0.44           | 0.40                               | 0.04       |
| TS-7+CP  | 0.59           | 0.62                               | -0.03      |
| TS-8+CP  | 0.60           | 0.49                               | 0.11       |
| TS-9+CP  | 0.51           | 0.39                               | 0.12       |
| TS-10+CP | 0.32           | 0.40                               | -0.08      |
| TS-11+CP | 0.04           | 0.19                               | -0.15      |
| TS-12+CP | 0.88           | 0.93                               | -0.05      |
| TS-13+CP | 0.76           | 0.77                               | -0.01      |
| TS-14+CP | 0.60           | 0.75                               | -0.15      |
| TS-15+CP | 0.35           | 0.67                               | -0.32      |
| TS-16+CP | 0.81           | 0.78                               | 0.03       |
| TS-17+CP | 0.00           | 0.07                               | -0.07      |
| TS-18+CP | 0.03           | 0.07                               | -0.04      |
| TS-19+CP | 0.32           | 0.31                               | 0.01       |
| TS-20+CP | 0.48           | 0.32                               | 0.16       |
| TS-21+CP | 0.23           | 0.34                               | -0.11      |
| TS-22+CP | 0.40           | 0.35                               | 0.05       |
| TS-23+CP | 0.55           | 0.56                               | -0.01      |
| TS-24+CP | 0.03           | 0.07                               | -0.04      |
| TS-25+CP | 0.40           | 0.37                               | 0.03       |
| TS-26+CP | 0.61           | 0.50                               | 0.11       |
| TS-27+CP | 0.41           | 0.28                               | 0.13       |
| TS-28+CP | 0.38           | 0.27                               | 0.11       |
| TS-29+CP | 0.14           | 0.10                               | 0.04       |
| TS-30+CP | 0.09           | 0.09                               | 0.00       |
| TS-31+CP | 0.22           | 0.33                               | -0.11      |
| TS-32+CP | 0.64           | 0.37                               | 0.27       |
| TS-33+CP | 0.00           | 0.07                               | -0.07      |
| TS-34+CP | 0.55           | 0.50                               | 0.05       |
| TS-35+CP | 0.52           | 0.35                               | 0.17       |
| TS-36+CP | 0.41           | 0.33                               | 0.08       |
| TS-37+CP | 0.19           | 0.17                               | 0.02       |
| TS-38+CP | 0.06           | 0.07                               | -0.01      |
| TS-39+CP | 0.00           | 0.07                               | -0.07      |
| TS-40+CP | 0.32           | 0.24                               | 0.08       |
| TS-41+CP | 0.34           | 0.42                               | -0.08      |
| TS-42+CP | 0.45           | 0.38                               | 0.07       |
| TS-43+CP | 0.25           | 0.34                               | -0.09      |
| TS-44+CP | 0.12           | 0.24                               | -0.12      |
| TS-45+CP | 0.62           | 0.49                               | 0.13       |
| TS-46+CP | 0.02           | 0.21                               | -0.19      |
| TS-47+CP | 0.35           | 0.32                               | 0.03       |
| TS-48+CP | 0.33           | 0.35                               | -0.02      |
| TS-49+CP | 0.45           | 0.33                               | 0.12       |
| TS-50+CP | 0.24           | 0.30                               | -0.06      |
| TS-51+CP | 0.12           | 0.21                               | -0.09      |
| TS-52+CP | 0.53           | 0.42                               | 0.11       |
| TS-53+CP | 0.01           | 0.19                               | -0.18      |
| TS-54+CP | 0.35           | 0.29                               | 0.06       |
| TS-55+CP | 0.00           | 0.07                               | -0.07      |
| TS-56+CP | 0.24           | 0.31                               | -0.07      |
| TS-57+CP | 0.28           | 0.34                               | -0.06      |
| TS-58+CP | 0.39           | 0.32                               | 0.07       |
| TS-59+CP | 0.18           | 0.30                               | -0.12      |
| TS-60+CP | 0.18           | 0.18                               | 0.00       |
| TS-61+CP | 0.48           | 0.40                               | 0.08       |
| TS-62+CP | 0.12           | 0.16                               | -0.04      |
| TS-63+CP | 0.28           | 0.30                               | -0.02      |
| TS-64+CP | 0.36           | 0.35                               | 0.01       |
| TS-65+CP | 0.47           | 0.33                               | 0.14       |
| TS-66+CP | 0.27           | 0.32                               | -0.05      |
| TS-67+CP | 0.15           | 0.12                               | 0.03       |
| TS-68+CP | 0.59           | 0.41                               | 0.18       |
| TS-69+CP | 0.06           | 0.11                               | -0.05      |
| TS-70+CP | 0.38           | 0.32                               | 0.06       |



**Table S11.** B3LYP/6-31G\* energies (E), zero-point corrected energies (ZPE), enthalpies (H) and Gibbs free energies (G) computed for compounds **1-70** (in au).

|    | E            | ZPE          | H            | G            |
|----|--------------|--------------|--------------|--------------|
| 1  | -170.831553  | -170.780570  | -170.775482  | -170.806451  |
| 2  | -191.911974  | -191.850322  | -191.845023  | -191.876601  |
| 3  | -218.557189  | -218.462749  | -218.455446  | -218.491819  |
| 4  | -283.087910  | -283.032697  | -283.027055  | -283.060471  |
| 5  | -415.626329  | -415.568663  | -415.562102  | -415.598118  |
| 6  | -182.689212  | -182.569106  | -182.560657  | -182.600741  |
| 7  | -1023.332753 | -1023.283217 | -1023.276526 | -1023.313688 |
| 8  | -651.505321  | -651.452747  | -651.446686  | -651.481596  |
| 9  | -231.233543  | -231.143442  | -231.136819  | -231.172062  |
| 10 | -231.232083  | -231.141978  | -231.135251  | -231.170694  |
| 11 | -284.151760  | -284.091096  | -284.084216  | -284.120577  |
| 12 | -678.146096  | -678.061014  | -678.052826  | -678.092581  |
| 13 | -257.878744  | -257.755990  | -257.747263  | -257.787354  |
| 14 | -257.881383  | -257.758609  | -257.749811  | -257.790015  |
| 15 | -310.793267  | -310.700168  | -310.691220  | -310.732334  |
| 16 | -263.062684  | -263.012884  | -263.006341  | -263.042013  |
| 17 | -263.068025  | -263.017912  | -263.011406  | -263.047174  |
| 18 | -263.069800  | -263.019901  | -263.013215  | -263.048955  |
| 19 | -210.153884  | -210.074537  | -210.068007  | -210.102773  |
| 20 | -210.151515  | -210.072170  | -210.065765  | -210.100426  |
| 21 | -528.946720  | -528.879458  | -528.870967  | -528.912443  |
| 22 | -222.011233  | -221.862776  | -221.852868  | -221.896499  |
| 23 | -1062.655991 | -1062.578228 | -1062.570000 | -1062.610939 |
| 24 | -487.574299  | -487.516387  | -487.508254  | -487.549494  |
| 25 | -455.726292  | -455.642851  | -455.634651  | -455.675460  |
| 26 | -355.295391  | -355.246924  | -355.238664  | -355.279073  |
| 27 | -249.472856  | -249.365195  | -249.357268  | -249.395674  |
| 28 | -249.470718  | -249.363068  | -249.355033  | -249.393850  |
| 29 | -302.392155  | -302.313966  | -302.305872  | -302.345292  |
| 30 | -302.389739  | -302.311599  | -302.303529  | -302.342911  |
| 31 | -270.550740  | -270.432402  | -270.424246  | -270.463324  |
| 32 | -376.378754  | -376.319489  | -376.310980  | -376.352018  |
| 33 | -447.518338  | -447.471690  | -447.461587  | -447.506622  |
| 34 | -394.619231  | -394.542781  | -394.532895  | -394.576926  |
| 35 | -415.703786  | -415.616561  | -415.606393  | -415.651327  |
| 36 | -309.865742  | -309.719198  | -309.709400  | -309.752774  |
| 37 | -442.342426  | -442.222994  | -442.210766  | -442.260060  |
| 38 | -341.712690  | -341.606423  | -341.596743  | -341.639746  |
| 39 | -341.707330  | -341.601283  | -341.591438  | -341.635146  |
| 40 | -288.789666  | -288.654015  | -288.644410  | -288.687023  |
| 41 | -229.991213  | -229.922927  | -229.917670  | -229.949904  |
| 42 | -269.315201  | -269.218829  | -269.211874  | -269.248434  |
| 43 | -269.316902  | -269.220579  | -269.213758  | -269.249832  |
| 44 | -322.232983  | -322.165905  | -322.158992  | -322.195881  |
| 45 | -689.588911  | -689.529651  | -689.523357  | -689.559194  |
| 46 | -361.559513  | -361.464422  | -361.455719  | -361.497111  |
| 47 | -308.640155  | -308.515820  | -308.507238  | -308.547711  |
| 48 | -269.349344  | -269.250976  | -269.244878  | -269.279611  |
| 49 | -308.671574  | -308.545333  | -308.537487  | -308.576482  |
| 50 | -308.672377  | -308.546106  | -308.538374  | -308.576970  |
| 51 | -361.590770  | -361.493751  | -361.485900  | -361.525349  |
| 52 | -728.943818  | -728.854786  | -728.847548  | -728.885836  |
| 53 | -400.915381  | -400.790453  | -400.780819  | -400.824499  |
| 54 | -347.993221  | -347.839144  | -347.829528  | -347.873488  |
| 55 | -379.289544  | -379.233658  | -379.227530  | -379.262731  |
| 56 | -305.264184  | -305.189272  | -305.183671  | -305.217239  |
| 57 | -308.666132  | -308.538185  | -308.531158  | -308.568087  |
| 58 | -347.986463  | -347.830442  | -347.821834  | -347.862334  |
| 59 | -347.987714  | -347.831766  | -347.823190  | -347.863642  |
| 60 | -400.907242  | -400.780617  | -400.771831  | -400.813361  |
| 61 | -768.259863  | -768.141349  | -768.133185  | -768.173479  |
| 62 | -440.228781  | -440.074148  | -440.063721  | -440.108901  |
| 63 | -387.303713  | -387.119770  | -387.109463  | -387.154071  |
| 64 | -457.864823  | -457.749222  | -457.741757  | -457.780141  |
| 65 | -497.186729  | -497.043142  | -497.034010  | -497.076111  |
| 66 | -497.187201  | -497.043663  | -497.034552  | -497.076585  |
| 67 | -550.104428  | -549.990302  | -549.980999  | -550.024047  |
| 68 | -917.458241  | -917.352115  | -917.343469  | -917.385230  |
| 69 | -589.428153  | -589.286093  | -589.275068  | -589.321924  |
| 70 | -536.505616  | -536.334275  | -536.323273  | -536.370118  |

**Table S12.** B3LYP/6-31G\* energies (E), zero-point corrected energies (ZPE), enthalpies (H) and Gibbs free energies (G) computed for the transition structures of the reactions between compounds **1-70** and **CP** (in au).

|                 | <b>E</b>     | <b>ZPE</b>   | <b>H</b>     | <b>G</b>     |
|-----------------|--------------|--------------|--------------|--------------|
| <b>TS-1+CP</b>  | -364.906426  | -364.759340  | -364.750581  | -364.791783  |
| <b>TS-2+CP</b>  | -385.987063  | -385.829218  | -385.820285  | -385.861855  |
| <b>TS-3+CP</b>  | -412.641803  | -412.451192  | -412.440028  | -412.486949  |
| <b>TS-4+CP</b>  | -477.169715  | -477.018370  | -477.008956  | -477.052078  |
| <b>TS-5+CP</b>  | -609.699523  | -609.546029  | -609.535726  | -609.580883  |
| <b>TS-6+CP</b>  | -376.765456  | -376.548622  | -376.536733  | -376.584761  |
| <b>TS-7+CP</b>  | -1217.413704 | -1217.268011 | -1217.257421 | -1217.304245 |
| <b>TS-8+CP</b>  | -845.580778  | -845.432210  | -845.422188  | -845.466788  |
| <b>TS-9+CP</b>  | -425.303090  | -425.116957  | -425.106529  | -425.151318  |
| <b>TS-10+CP</b> | -425.301209  | -425.115073  | -425.104662  | -425.149444  |
| <b>TS-11+CP</b> | -478.229048  | -478.072427  | -478.061752  | -478.107740  |
| <b>TS-12+CP</b> | -872.233198  | -872.052113  | -872.039764  | -872.090020  |
| <b>TS-13+CP</b> | -451.958563  | -451.739781  | -451.727061  | -451.777313  |
| <b>TS-14+CP</b> | -451.956519  | -451.737460  | -451.724874  | -451.774750  |
| <b>TS-15+CP</b> | -504.877327  | -504.687963  | -504.675109  | -504.726095  |
| <b>TS-16+CP</b> | -457.148958  | -457.003225  | -456.992590  | -457.038548  |
| <b>TS-17+CP</b> | -457.144764  | -456.998847  | -456.988402  | -457.033827  |
| <b>TS-18+CP</b> | -457.147576  | -457.001631  | -456.991198  | -457.036551  |
| <b>TS-19+CP</b> | -404.220632  | -404.045343  | -404.035094  | -404.079507  |
| <b>TS-20+CP</b> | -404.219948  | -404.044733  | -404.034431  | -404.078872  |
| <b>TS-21+CP</b> | -723.024629  | -722.861535  | -722.849201  | -722.899490  |
| <b>TS-22+CP</b> | -416.079952  | -415.834845  | -415.821497  | -415.872511  |
| <b>TS-23+CP</b> | -1256.728225 | -1256.554392 | -1256.542304 | -1256.592164 |
| <b>TS-24+CP</b> | -681.666483  | -681.512275  | -681.500365  | -681.549860  |
| <b>TS-25+CP</b> | -649.808119  | -649.628677  | -649.616622  | -649.665888  |
| <b>TS-26+CP</b> | -549.380189  | -549.236027  | -549.223651  | -549.273659  |
| <b>TS-27+CP</b> | -443.534400  | -443.331066  | -443.319285  | -443.366796  |
| <b>TS-28+CP</b> | -443.532743  | -443.329374  | -443.317515  | -443.365254  |
| <b>TS-29+CP</b> | -496.462771  | -496.288796  | -496.276820  | -496.325258  |
| <b>TS-30+CP</b> | -496.458095  | -496.284290  | -496.272275  | -496.320777  |
| <b>TS-31+CP</b> | -464.612139  | -464.397630  | -464.385932  | -464.433097  |
| <b>TS-32+CP</b> | -570.463973  | -570.309043  | -570.296395  | -570.347065  |
| <b>TS-33+CP</b> | -641.602697  | -641.460499  | -641.446286  | -641.500238  |
| <b>TS-34+CP</b> | -588.693444  | -588.521292  | -588.507437  | -588.560137  |
| <b>TS-35+CP</b> | -609.778034  | -609.594788  | -609.580813  | -609.633798  |
| <b>TS-36+CP</b> | -503.923760  | -503.681216  | -503.667998  | -503.718320  |
| <b>TS-37+CP</b> | -636.419447  | -636.203715  | -636.187505  | -636.245416  |
| <b>TS-38+CP</b> | -535.775108  | -535.573055  | -535.559606  | -535.610777  |
| <b>TS-39+CP</b> | -535.769292  | -535.567527  | -535.553985  | -535.605364  |
| <b>TS-40+CP</b> | -482.845239  | -482.613875  | -482.600730  | -482.650779  |
| <b>TS-41+CP</b> | -424.065243  | -423.901307  | -423.892259  | -423.934329  |
| <b>TS-42+CP</b> | -463.382932  | -463.191024  | -463.180221  | -463.226197  |
| <b>TS-43+CP</b> | -463.381763  | -463.189746  | -463.179216  | -463.224212  |
| <b>TS-44+CP</b> | -516.309986  | -516.147401  | -516.136542  | -516.182897  |
| <b>TS-45+CP</b> | -883.662454  | -883.507743  | -883.497441  | -883.542962  |
| <b>TS-46+CP</b> | -555.628426  | -555.437803  | -555.425244  | -555.475061  |
| <b>TS-47+CP</b> | -502.699380  | -502.479569  | -502.467208  | -502.516201  |
| <b>TS-48+CP</b> | -463.416227  | -463.221973  | -463.212099  | -463.255990  |
| <b>TS-49+CP</b> | -502.731753  | -502.509526  | -502.498002  | -502.545306  |
| <b>TS-50+CP</b> | -502.730687  | -502.508335  | -502.497044  | -502.543544  |
| <b>TS-51+CP</b> | -555.659635  | -555.466726  | -555.455020  | -555.503152  |
| <b>TS-52+CP</b> | -923.008526  | -922.823647  | -922.812551  | -922.859489  |
| <b>TS-53+CP</b> | -594.975425  | -594.754577  | -594.741252  | -594.792503  |
| <b>TS-54+CP</b> | -542.046169  | -541.795889  | -541.782953  | -541.832763  |
| <b>TS-55+CP</b> | -573.371214  | -573.219581  | -573.209448  | -573.254352  |
| <b>TS-56+CP</b> | -499.333965  | -499.163059  | -499.153582  | -499.196769  |
| <b>TS-57+CP</b> | -502.730142  | -502.506271  | -502.495374  | -502.541543  |
| <b>TS-58+CP</b> | -542.041507  | -541.789731  | -541.777236  | -541.826644  |
| <b>TS-59+CP</b> | -542.042950  | -541.791098  | -541.778750  | -541.827618  |
| <b>TS-60+CP</b> | -594.972989  | -594.750670  | -594.737908  | -594.788297  |
| <b>TS-61+CP</b> | -962.319755  | -962.105478  | -962.093313  | -962.142605  |
| <b>TS-62+CP</b> | -634.283591  | -634.033274  | -634.018978  | -634.072291  |
| <b>TS-63+CP</b> | -581.351861  | -581.071957  | -581.058090  | -581.109910  |
| <b>TS-64+CP</b> | -651.938101  | -651.726871  | -651.715362  | -651.763206  |
| <b>TS-65+CP</b> | -691.251544  | -691.012247  | -690.999147  | -691.050137  |
| <b>TS-66+CP</b> | -691.251060  | -691.011688  | -690.998707  | -691.049216  |
| <b>TS-67+CP</b> | -744.180062  | -743.970210  | -743.956851  | -744.008802  |
| <b>TS-68+CP</b> | -1111.528417 | -1111.326705 | -1111.313945 | -1111.364787 |
| <b>TS-69+CP</b> | -783.493158  | -783.255331  | -783.240391  | -783.295323  |
| <b>TS-70+CP</b> | -730.563085  | -730.295671  | -730.281186  | -730.334510  |

**Table S13.** B3LYP/6-31G\* energies (E), zero-point corrected energies (ZPE), enthalpies (H) and Gibbs free energies (G) computed for the products of the reactions between compounds **1-70** and **CP** (in au).

|                | <b>E</b>     | <b>ZPE</b>   | <b>H</b>     | <b>G</b>     |
|----------------|--------------|--------------|--------------|--------------|
| <b>P-1+CP</b>  | -364.967788  | -364.815401  | -364.807571  | -364.846648  |
| <b>P-2+CP</b>  | -386.042653  | -385.879965  | -385.871791  | -385.911927  |
| <b>P-3+CP</b>  | -412.688367  | -412.492967  | -412.482634  | -412.527686  |
| <b>P-4+CP</b>  | -477.228078  | -477.071625  | -477.062988  | -477.105226  |
| <b>P-5+CP</b>  | -609.767100  | -609.608163  | -609.598693  | -609.642112  |
| <b>P-6+CP</b>  | -376.815521  | -376.594901  | -376.583590  | -376.631158  |
| <b>P-7+CP</b>  | -1217.460196 | -1217.310206 | -1217.300413 | -1217.346345 |
| <b>P-8+CP</b>  | -845.634290  | -845.481303  | -845.472073  | -845.514769  |
| <b>P-9+CP</b>  | -425.355757  | -425.165145  | -425.155610  | -425.198276  |
| <b>P-10+CP</b> | -425.356791  | -425.166026  | -425.156365  | -425.199743  |
| <b>P-11+CP</b> | -478.279399  | -478.118339  | -478.108336  | -478.153195  |
| <b>P-12+CP</b> | -872.275528  | -872.090089  | -872.078630  | -872.126308  |
| <b>P-13+CP</b> | -452.001210  | -451.777777  | -451.766098  | -451.813531  |
| <b>P-14+CP</b> | -452.002822  | -451.779360  | -451.767533  | -451.815819  |
| <b>P-15+CP</b> | -504.921654  | -504.727852  | -504.715704  | -504.765323  |
| <b>P-16+CP</b> | -457.195379  | -457.045108  | -457.035425  | -457.078794  |
| <b>P-17+CP</b> | -457.200063  | -457.049437  | -457.039802  | -457.083343  |
| <b>P-18+CP</b> | -457.203369  | -457.052636  | -457.043002  | -457.086619  |
| <b>P-19+CP</b> | -404.282066  | -404.101687  | -404.092368  | -404.134631  |
| <b>P-20+CP</b> | -404.280237  | -404.100063  | -404.090785  | -404.132663  |
| <b>P-21+CP</b> | -723.080899  | -722.913135  | -722.901495  | -722.950464  |
| <b>P-22+CP</b> | -416.129298  | -415.880612  | -415.867826  | -415.918402  |
| <b>P-23+CP</b> | -1256.774049 | -1256.595994 | -1256.584703 | -1256.633773 |
| <b>P-24+CP</b> | -681.725152  | -681.565997  | -681.554844  | -681.603301  |
| <b>P-25+CP</b> | -649.853477  | -649.669450  | -649.658016  | -649.706423  |
| <b>P-26+CP</b> | -549.423909  | -549.275584  | -549.264039  | -549.311859  |
| <b>P-27+CP</b> | -443.593690  | -443.385492  | -443.374734  | -443.419628  |
| <b>P-28+CP</b> | -443.591238  | -443.382878  | -443.372155  | -443.417017  |
| <b>P-29+CP</b> | -496.516208  | -496.337623  | -496.326563  | -496.372755  |
| <b>P-30+CP</b> | -496.513058  | -496.334606  | -496.323505  | -496.369783  |
| <b>P-31+CP</b> | -464.666136  | -464.447482  | -464.436512  | -464.482369  |
| <b>P-32+CP</b> | -570.502888  | -570.344013  | -570.332127  | -570.381204  |
| <b>P-33+CP</b> | -641.640713  | -641.494945  | -641.481460  | -641.533460  |
| <b>P-34+CP</b> | -588.735715  | -588.559566  | -588.546592  | -588.596927  |
| <b>P-35+CP</b> | -609.814885  | -609.627953  | -609.614737  | -609.666053  |
| <b>P-36+CP</b> | -503.974341  | -503.727315  | -503.715117  | -503.763018  |
| <b>P-37+CP</b> | -636.454156  | -636.234836  | -636.219376  | -636.275722  |
| <b>P-38+CP</b> | -535.827109  | -535.620768  | -535.608277  | -535.657016  |
| <b>P-39+CP</b> | -535.821804  | -535.615373  | -535.602887  | -535.651626  |
| <b>P-40+CP</b> | -482.901119  | -482.664952  | -482.652913  | -482.700161  |
| <b>P-41+CP</b> | -424.126731  | -423.958249  | -423.950045  | -423.990112  |
| <b>P-42+CP</b> | -463.443188  | -463.246753  | -463.236962  | -463.280121  |
| <b>P-43+CP</b> | -463.441831  | -463.245615  | -463.235920  | -463.278918  |
| <b>P-44+CP</b> | -516.366950  | -516.200180  | -516.190161  | -516.234444  |
| <b>P-45+CP</b> | -883.722725  | -883.563722  | -883.554237  | -883.597526  |
| <b>P-46+CP</b> | -555.683949  | -555.489321  | -555.477657  | -555.525103  |
| <b>P-47+CP</b> | -502.757463  | -502.533256  | -502.521990  | -502.567961  |
| <b>P-48+CP</b> | -463.470770  | -463.271998  | -463.262856  | -463.305149  |
| <b>P-49+CP</b> | -502.785535  | -502.558901  | -502.548260  | -502.593320  |
| <b>P-50+CP</b> | -502.783550  | -502.557034  | -502.546444  | -502.591534  |
| <b>P-51+CP</b> | -555.709096  | -555.512121  | -555.501126  | -555.547681  |
| <b>P-52+CP</b> | -923.064442  | -922.875389  | -922.864912  | -922.910511  |
| <b>P-53+CP</b> | -595.023350  | -594.798400  | -594.785951  | -594.835036  |
| <b>P-54+CP</b> | -542.096140  | -541.841436  | -541.829481  | -541.876906  |
| <b>P-55+CP</b> | -573.424858  | -573.268503  | -573.259181  | -573.302289  |
| <b>P-56+CP</b> | -499.392560  | -499.216748  | -499.208007  | -499.249565  |
| <b>P-57+CP</b> | -502.787342  | -502.559126  | -502.548972  | -502.593675  |
| <b>P-58+CP</b> | -542.099662  | -541.843585  | -541.831957  | -541.879253  |
| <b>P-59+CP</b> | -542.097507  | -541.841375  | -541.829799  | -541.877462  |
| <b>P-60+CP</b> | -595.025228  | -594.798905  | -594.786877  | -594.835933  |
| <b>P-61+CP</b> | -962.382835  | -962.164262  | -962.152820  | -962.200233  |
| <b>P-62+CP</b> | -634.335937  | -634.081718  | -634.068256  | -634.119553  |
| <b>P-63+CP</b> | -581.405739  | -581.121603  | -581.108626  | -581.158489  |
| <b>P-64+CP</b> | -651.994367  | -651.778513  | -651.767758  | -651.814000  |
| <b>P-65+CP</b> | -691.307985  | -691.064190  | -691.051994  | -691.100663  |
| <b>P-66+CP</b> | -691.301901  | -691.058090  | -691.045959  | -691.094675  |
| <b>P-67+CP</b> | -744.228656  | -744.014695  | -744.002107  | -744.052256  |
| <b>P-68+CP</b> | -1111.585923 | -1111.379870 | -1111.367792 | -1111.416998 |
| <b>P-69+CP</b> | -783.541198  | -783.299376  | -783.285325  | -783.337959  |
| <b>P-70+CP</b> | -730.612413  | -730.340451  | -730.326920  | -730.378014  |

**Table S14.** B3LYP/6-31G\* energies (E), zero-point corrected energies (ZPE), enthalpies (H) and Gibbs free energies (G) computed for the transition structures of the reactions between compounds **1-70** and **CH** (in au).

|                 | <b>E</b>     | <b>ZPE</b>   | <b>H</b>     | <b>G</b>     |
|-----------------|--------------|--------------|--------------|--------------|
| <b>TS-1+CH</b>  | -404.216785  | -404.040162  | -404.030184  | -404.074312  |
| <b>TS-2+CH</b>  | -425.298424  | -425.110935  | -425.100828  | -425.145101  |
| <b>TS-3+CH</b>  | -451.953934  | -451.733552  | -451.721230  | -451.770849  |
| <b>TS-4+CH</b>  | -516.480725  | -516.299685  | -516.289151  | -516.334714  |
| <b>TS-5+CH</b>  | -649.009736  | -648.826751  | -648.815192  | -648.863416  |
| <b>TS-6+CH</b>  | -416.077732  | -415.831254  | -415.818257  | -415.868577  |
| <b>TS-7+CH</b>  | -1256.725432 | -1256.550071 | -1256.538320 | -1256.587614 |
| <b>TS-8+CH</b>  | -884.892324  | -884.714246  | -884.702995  | -884.750321  |
| <b>TS-9+CH</b>  | -464.614230  | -464.398421  | -464.386904  | -464.433933  |
| <b>TS-10+CH</b> | -464.613914  | -464.397745  | -464.386359  | -464.433265  |
| <b>TS-11+CH</b> | -517.540039  | -517.353761  | -517.341953  | -517.390447  |
| <b>TS-12+CH</b> | -911.546446  | -911.335686  | -911.322213  | -911.374794  |
| <b>TS-13+CH</b> | -491.270491  | -491.022182  | -491.008240  | -491.061557  |
| <b>TS-14+CH</b> | -491.267509  | -491.018812  | -491.005039  | -491.057743  |
| <b>TS-15+CH</b> | -544.188937  | -543.969963  | -543.955952  | -544.009533  |
| <b>TS-16+CH</b> | -496.460533  | -496.285172  | -496.273298  | -496.322237  |
| <b>TS-17+CH</b> | -496.455215  | -496.279811  | -496.268152  | -496.316409  |
| <b>TS-18+CH</b> | -496.458043  | -496.282516  | -496.270903  | -496.318980  |
| <b>TS-19+CH</b> | -443.529852  | -443.324694  | -443.313412  | -443.360093  |
| <b>TS-20+CH</b> | -443.529755  | -443.324927  | -443.313469  | -443.360579  |
| <b>TS-21+CH</b> | -762.333681  | -762.141013  | -762.127531  | -762.180316  |
| <b>TS-22+CH</b> | -455.391071  | -455.116230  | -455.101814  | -455.155072  |
| <b>TS-23+CH</b> | -1296.038618 | -1295.835049 | -1295.821805 | -1295.874122 |
| <b>TS-24+CH</b> | -720.977250  | -720.793493  | -720.780423  | -720.832334  |
| <b>TS-25+CH</b> | -689.118206  | -688.909364  | -688.896043  | -688.948368  |
| <b>TS-26+CH</b> | -588.691607  | -588.517982  | -588.504345  | -588.557322  |
| <b>TS-27+CH</b> | -482.844073  | -482.610933  | -482.598123  | -482.647745  |
| <b>TS-28+CH</b> | -482.840882  | -482.607725  | -482.594762  | -482.645349  |
| <b>TS-29+CH</b> | -535.772652  | -535.569129  | -535.555958  | -535.607172  |
| <b>TS-30+CH</b> | -535.767624  | -535.563966  | -535.550931  | -535.601600  |
| <b>TS-31+CH</b> | -503.923260  | -503.679050  | -503.666244  | -503.716032  |
| <b>TS-32+CH</b> | -609.775159  | -609.590758  | -609.576867  | -609.630525  |
| <b>TS-33+CH</b> | -680.914047  | -680.742287  | -680.726925  | -680.783456  |
| <b>TS-34+CH</b> | -628.003289  | -627.801522  | -627.786509  | -627.841973  |
| <b>TS-35+CH</b> | -649.087904  | -648.875022  | -648.859970  | -648.915194  |
| <b>TS-36+CH</b> | -543.233372  | -542.960647  | -542.946557  | -542.998488  |
| <b>TS-37+CH</b> | -675.730598  | -675.485199  | -675.467933  | -675.528084  |
| <b>TS-38+CH</b> | -575.084041  | -574.852271  | -574.837762  | -574.891212  |
| <b>TS-39+CH</b> | -575.077015  | -574.845582  | -574.830903  | -574.885152  |
| <b>TS-40+CH</b> | -522.152726  | -521.891592  | -521.877377  | -521.929949  |
| <b>TS-41+CH</b> | -463.377392  | -463.183936  | -463.173688  | -463.218384  |
| <b>TS-42+CH</b> | -502.694778  | -502.473365  | -502.461421  | -502.509717  |
| <b>TS-43+CH</b> | -502.691955  | -502.470422  | -502.458680  | -502.506348  |
| <b>TS-44+CH</b> | -555.621489  | -555.429374  | -555.417326  | -555.466251  |
| <b>TS-45+CH</b> | -922.974784  | -922.790531  | -922.778999  | -922.827249  |
| <b>TS-46+CH</b> | -594.939174  | -594.718818  | -594.705194  | -594.757154  |
| <b>TS-47+CH</b> | -542.009499  | -541.759938  | -541.746520  | -541.797575  |
| <b>TS-48+CH</b> | -502.728109  | -502.504398  | -502.493315  | -502.539906  |
| <b>TS-49+CH</b> | -542.042854  | -541.791001  | -541.778405  | -541.827863  |
| <b>TS-50+CH</b> | -542.040056  | -541.788255  | -541.775747  | -541.825082  |
| <b>TS-51+CH</b> | -594.970649  | -594.748321  | -594.735382  | -594.786354  |
| <b>TS-52+CH</b> | -962.319858  | -962.105409  | -962.093103  | -962.142762  |
| <b>TS-53+CH</b> | -634.285107  | -634.034608  | -634.020187  | -634.073751  |
| <b>TS-54+CH</b> | -581.354387  | -581.074296  | -581.060293  | -581.112401  |
| <b>TS-55+CH</b> | -612.683397  | -612.502139  | -612.490840  | -612.538328  |
| <b>TS-56+CH</b> | -538.645531  | -538.445151  | -538.434471  | -538.480323  |
| <b>TS-57+CH</b> | -542.042357  | -541.788819  | -541.776817  | -541.825307  |
| <b>TS-58+CH</b> | -581.353248  | -581.071492  | -581.058062  | -581.109144  |
| <b>TS-59+CH</b> | -581.352594  | -581.071054  | -581.057603  | -581.108912  |
| <b>TS-60+CH</b> | -634.283763  | -634.031773  | -634.017890  | -634.070753  |
| <b>TS-61+CH</b> | -1001.631379 | -1001.387512 | -1001.374206 | -1001.425872 |
| <b>TS-62+CH</b> | -673.593196  | -673.312954  | -673.297714  | -673.352862  |
| <b>TS-63+CH</b> | -620.660790  | -620.351188  | -620.336270  | -620.390206  |
| <b>TS-64+CH</b> | -691.249666  | -691.008872  | -690.996193  | -691.046500  |
| <b>TS-65+CH</b> | -730.562767  | -730.293885  | -730.279693  | -730.332807  |
| <b>TS-66+CH</b> | -730.560584  | -730.291593  | -730.277479  | -730.330512  |
| <b>TS-67+CH</b> | -783.490980  | -783.251730  | -783.237140  | -783.291861  |
| <b>TS-68+CH</b> | -1150.839937 | -1150.608737 | -1150.594755 | -1150.648298 |
| <b>TS-69+CH</b> | -822.802968  | -822.535510  | -822.519523  | -822.576622  |
| <b>TS-70+CH</b> | -769.871737  | -769.574710  | -769.559097  | -769.614881  |

**Table S15.** B3LYP/6-31G\* energies (E), zero-point corrected energies (ZPE), enthalpies (H) and Gibbs free energies (G) computed for the products of the reactions between compounds **1-70** and **CH** (in au).

|                | <b>E</b>     | <b>ZPE</b>   | <b>H</b>     | <b>G</b>     |
|----------------|--------------|--------------|--------------|--------------|
| <b>P-1+CH</b>  | -404.296327  | -404.114157  | -404.105220  | -404.146858  |
| <b>P-2+CH</b>  | -425.371614  | -425.179264  | -425.169937  | -425.212918  |
| <b>P-3+CH</b>  | -452.017035  | -451.791741  | -451.780306  | -451.827933  |
| <b>P-4+CH</b>  | -516.558721  | -516.372331  | -516.362644  | -516.406832  |
| <b>P-5+CH</b>  | -649.097083  | -648.908317  | -648.897765  | -648.943521  |
| <b>P-6+CH</b>  | -416.143680  | -415.893168  | -415.880813  | -415.930583  |
| <b>P-7+CH</b>  | -1256.788222 | -1256.608359 | -1256.597483 | -1256.645820 |
| <b>P-8+CH</b>  | -884.962768  | -884.780030  | -884.769680  | -884.814996  |
| <b>P-9+CH</b>  | -464.683881  | -464.463463  | -464.452870  | -464.497975  |
| <b>P-10+CH</b> | -464.684947  | -464.464307  | -464.453599  | -464.499438  |
| <b>P-11+CH</b> | -517.611857  | -517.420859  | -517.409896  | -517.456618  |
| <b>P-12+CH</b> | -911.603758  | -911.388390  | -911.375846  | -911.426028  |
| <b>P-13+CH</b> | -491.328851  | -491.075493  | -491.062753  | -491.112733  |
| <b>P-14+CH</b> | -491.330569  | -491.077169  | -491.064284  | -491.115071  |
| <b>P-15+CH</b> | -544.250075  | -544.026407  | -544.013159  | -544.065352  |
| <b>P-16+CH</b> | -496.523150  | -496.343053  | -496.332277  | -496.378085  |
| <b>P-17+CH</b> | -496.527182  | -496.346762  | -496.336014  | -496.382207  |
| <b>P-18+CH</b> | -496.531553  | -496.350884  | -496.340179  | -496.386196  |
| <b>P-19+CH</b> | -443.609805  | -443.399428  | -443.389094  | -443.433696  |
| <b>P-20+CH</b> | -443.607666  | -443.397530  | -443.387223  | -443.431449  |
| <b>P-21+CH</b> | -762.409224  | -762.211647  | -762.198890  | -762.250647  |
| <b>P-22+CH</b> | -455.456700  | -455.177757  | -455.164083  | -455.216307  |
| <b>P-23+CH</b> | -1296.101217 | -1295.893237 | -1295.880892 | -1295.932397 |
| <b>P-24+CH</b> | -721.055799  | -720.866866  | -720.854570  | -720.906850  |
| <b>P-25+CH</b> | -689.179718  | -688.966006  | -688.953378  | -689.004782  |
| <b>P-26+CH</b> | -588.750364  | -588.572147  | -588.559535  | -588.609734  |
| <b>P-27+CH</b> | -482.920267  | -482.682233  | -482.670453  | -482.717737  |
| <b>P-28+CH</b> | -482.916632  | -482.678206  | -482.666506  | -482.713766  |
| <b>P-29+CH</b> | -535.843321  | -535.634930  | -535.622831  | -535.671347  |
| <b>P-30+CH</b> | -535.839064  | -535.630811  | -535.618642  | -535.667429  |
| <b>P-31+CH</b> | -503.993459  | -503.744809  | -503.732869  | -503.780930  |
| <b>P-32+CH</b> | -609.829998  | -609.641269  | -609.628295  | -609.679932  |
| <b>P-33+CH</b> | -680.966280  | -680.790662  | -680.776123  | -680.830469  |
| <b>P-34+CH</b> | -628.060331  | -627.854228  | -627.840257  | -627.892845  |
| <b>P-35+CH</b> | -649.140426  | -648.923606  | -648.909414  | -648.962811  |
| <b>P-36+CH</b> | -543.299246  | -543.022021  | -543.008992  | -543.058820  |
| <b>P-37+CH</b> | -675.779636  | -675.530381  | -675.513934  | -675.572371  |
| <b>P-38+CH</b> | -575.152490  | -574.916065  | -574.902637  | -574.953462  |
| <b>P-39+CH</b> | -575.145112  | -574.908783  | -574.895296  | -574.946770  |
| <b>P-40+CH</b> | -522.225260  | -521.958714  | -521.945887  | -521.994911  |
| <b>P-41+CH</b> | -463.461388  | -463.263063  | -463.253780  | -463.296193  |
| <b>P-42+CH</b> | -502.776265  | -502.550092  | -502.539221  | -502.584723  |
| <b>P-43+CH</b> | -502.774796  | -502.548727  | -502.537963  | -502.583325  |
| <b>P-44+CH</b> | -555.700686  | -555.504081  | -555.492981  | -555.539567  |
| <b>P-45+CH</b> | -923.057475  | -922.868607  | -922.858065  | -922.903524  |
| <b>P-46+CH</b> | -595.015819  | -594.791390  | -594.778700  | -594.828263  |
| <b>P-47+CH</b> | -542.088071  | -541.833878  | -541.821626  | -541.869729  |
| <b>P-48+CH</b> | -502.802891  | -502.574247  | -502.564036  | -502.608718  |
| <b>P-49+CH</b> | -542.116122  | -541.859696  | -541.847971  | -541.895479  |
| <b>P-50+CH</b> | -542.113824  | -541.857239  | -541.845679  | -541.892846  |
| <b>P-51+CH</b> | -595.040016  | -594.813225  | -594.801142  | -594.850089  |
| <b>P-52+CH</b> | -962.396920  | -962.177987  | -962.166471  | -962.214180  |
| <b>P-53+CH</b> | -634.352195  | -634.097412  | -634.083943  | -634.135212  |
| <b>P-54+CH</b> | -581.423407  | -581.138808  | -581.125883  | -581.175552  |
| <b>P-55+CH</b> | -612.758290  | -612.572071  | -612.561661  | -612.607177  |
| <b>P-56+CH</b> | -538.725210  | -538.519574  | -538.509724  | -538.553797  |
| <b>P-57+CH</b> | -542.116847  | -541.858981  | -541.847681  | -541.895084  |
| <b>P-58+CH</b> | -581.427552  | -581.141554  | -581.128903  | -581.178442  |
| <b>P-59+CH</b> | -581.424859  | -581.138888  | -581.126190  | -581.176302  |
| <b>P-60+CH</b> | -634.353622  | -634.097417  | -634.084305  | -634.135818  |
| <b>P-61+CH</b> | -1001.712384 | -1001.463956 | -1001.451465 | -1001.501045 |
| <b>P-62+CH</b> | -673.662329  | -673.377978  | -673.363569  | -673.416830  |
| <b>P-63+CH</b> | -620.730945  | -620.416732  | -620.402880  | -620.454490  |
| <b>P-64+CH</b> | -691.323994  | -691.078306  | -691.066468  | -691.115131  |
| <b>P-65+CH</b> | -730.635950  | -730.362116  | -730.348907  | -730.399750  |
| <b>P-66+CH</b> | -730.629473  | -730.355661  | -730.342528  | -730.393553  |
| <b>P-67+CH</b> | -783.557087  | -783.313281  | -783.299621  | -783.352117  |
| <b>P-68+CH</b> | -1150.915822 | -1150.679850 | -1150.666746 | -1150.717968 |
| <b>P-69+CH</b> | -822.867737  | -822.595957  | -822.580907  | -822.635575  |
| <b>P-70+CH</b> | -769.937959  | -769.635616  | -769.621282  | -769.673833  |



**Table S16.** B3LYP/6-31G\* energies (E), zero-point corrected energies (ZPE), enthalpies (H) and Gibbs free energies (G) computed for the transition structures of the reactions between compounds **1-70** and **BU** (in au).

|                 | <b>E</b>     | <b>ZPE</b>   | <b>H</b>     | <b>G</b>     |
|-----------------|--------------|--------------|--------------|--------------|
| <b>TS-1+BU</b>  | -326.791120  | -326.651430  | -326.642400  | -326.684022  |
| <b>TS-2+BU</b>  | -347.873275  | -347.722883  | -347.713656  | -347.755623  |
| <b>TS-3+BU</b>  | -374.527566  | -374.344346  | -374.332886  | -374.380276  |
| <b>TS-4+BU</b>  | -439.054059  | -438.909967  | -438.900360  | -438.943585  |
| <b>TS-5+BU</b>  | -571.584541  | -571.438437  | -571.427880  | -571.473497  |
| <b>TS-6+BU</b>  | -338.655618  | -338.446127  | -338.434070  | -338.481869  |
| <b>TS-7+BU</b>  | -1179.301438 | -1179.163168 | -1179.152340 | -1179.199205 |
| <b>TS-8+BU</b>  | -807.469571  | -807.328422  | -807.318080  | -807.363203  |
| <b>TS-9+BU</b>  | -387.192154  | -387.013776  | -387.002899  | -387.048707  |
| <b>TS-10+BU</b> | -387.187290  | -387.008548  | -386.997886  | -387.043055  |
| <b>TS-11+BU</b> | -440.113209  | -439.963960  | -439.953042  | -439.999470  |
| <b>TS-12+BU</b> | -834.121575  | -833.947728  | -833.935167  | -833.985416  |
| <b>TS-13+BU</b> | -413.847102  | -413.636128  | -413.622880  | -413.675103  |
| <b>TS-14+BU</b> | -413.841795  | -413.630282  | -413.617368  | -413.668013  |
| <b>TS-15+BU</b> | -466.760532  | -466.578519  | -466.565430  | -466.616791  |
| <b>TS-16+BU</b> | -419.031884  | -418.893577  | -418.882574  | -418.929288  |
| <b>TS-17+BU</b> | -419.027712  | -418.889163  | -418.878474  | -418.924468  |
| <b>TS-18+BU</b> | -419.031092  | -418.892560  | -418.881860  | -418.927808  |
| <b>TS-19+BU</b> | -366.106184  | -365.938142  | -365.927707  | -365.972392  |
| <b>TS-20+BU</b> | -366.106117  | -365.938386  | -365.927769  | -365.972809  |
| <b>TS-21+BU</b> | -684.909451  | -684.753799  | -684.741224  | -684.791881  |
| <b>TS-22+BU</b> | -377.969980  | -377.732020  | -377.718565  | -377.769339  |
| <b>TS-23+BU</b> | -1218.615791 | -1218.449413 | -1218.437046 | -1218.487309 |
| <b>TS-24+BU</b> | -643.550688  | -643.403842  | -643.391683  | -643.441630  |
| <b>TS-25+BU</b> | -611.691375  | -611.519439  | -611.507117  | -611.557050  |
| <b>TS-26+BU</b> | -511.261797  | -511.124926  | -511.112275  | -511.162890  |
| <b>TS-27+BU</b> | -405.420996  | -405.225048  | -405.212986  | -405.261006  |
| <b>TS-28+BU</b> | -405.418875  | -405.222758  | -405.210759  | -405.258747  |
| <b>TS-29+BU</b> | -458.345609  | -458.178868  | -458.166686  | -458.215605  |
| <b>TS-30+BU</b> | -458.342549  | -458.176060  | -458.163840  | -458.212789  |
| <b>TS-31+BU</b> | -426.498627  | -426.291697  | -426.279685  | -426.327505  |
| <b>TS-32+BU</b> | -532.345777  | -532.198224  | -532.185297  | -532.236621  |
| <b>TS-33+BU</b> | -603.482582  | -603.347713  | -603.333270  | -603.387986  |
| <b>TS-34+BU</b> | -550.575569  | -550.410732  | -550.396631  | -550.450076  |
| <b>TS-35+BU</b> | -571.661586  | -571.485788  | -571.471586  | -571.525057  |
| <b>TS-36+BU</b> | -465.814185  | -465.578806  | -465.565547  | -465.615606  |
| <b>TS-37+BU</b> | -598.303644  | -598.095313  | -598.078926  | -598.137248  |
| <b>TS-38+BU</b> | -497.659418  | -497.464736  | -497.451078  | -497.502801  |
| <b>TS-39+BU</b> | -497.654326  | -497.459669  | -497.446026  | -497.497804  |
| <b>TS-40+BU</b> | -444.732120  | -444.507870  | -444.494619  | -444.544843  |
| <b>TS-41+BU</b> | -385.952863  | -385.796387  | -385.787067  | -385.829417  |
| <b>TS-42+BU</b> | -425.273618  | -425.089303  | -425.078197  | -425.124456  |
| <b>TS-43+BU</b> | -425.268565  | -425.084163  | -425.073286  | -425.118951  |
| <b>TS-44+BU</b> | -478.195014  | -478.039828  | -478.028732  | -478.075417  |
| <b>TS-45+BU</b> | -845.552405  | -845.405072  | -845.394480  | -845.440292  |
| <b>TS-46+BU</b> | -517.515477  | -517.332283  | -517.319507  | -517.369562  |
| <b>TS-47+BU</b> | -464.588846  | -464.376493  | -464.363902  | -464.413076  |
| <b>TS-48+BU</b> | -425.303167  | -425.116266  | -425.106162  | -425.150343  |
| <b>TS-49+BU</b> | -464.622065  | -464.407285  | -464.395472  | -464.443242  |
| <b>TS-50+BU</b> | -464.617788  | -464.403023  | -464.391413  | -464.438593  |
| <b>TS-51+BU</b> | -517.544610  | -517.359095  | -517.347172  | -517.395652  |
| <b>TS-52+BU</b> | -884.898095  | -884.720616  | -884.709158  | -884.756880  |
| <b>TS-53+BU</b> | -556.862319  | -556.648815  | -556.635302  | -556.686872  |
| <b>TS-54+BU</b> | -503.935683  | -503.692818  | -503.679655  | -503.729847  |
| <b>TS-55+BU</b> | -535.256640  | -535.112294  | -535.101966  | -535.147144  |
| <b>TS-56+BU</b> | -461.219916  | -461.056421  | -461.046698  | -461.090207  |
| <b>TS-57+BU</b> | -464.617701  | -464.401183  | -464.390079  | -464.436469  |
| <b>TS-58+BU</b> | -503.934487  | -503.690084  | -503.677332  | -503.727027  |
| <b>TS-59+BU</b> | -503.931236  | -503.686731  | -503.674177  | -503.723407  |
| <b>TS-60+BU</b> | -556.858179  | -556.643061  | -556.630116  | -556.680946  |
| <b>TS-61+BU</b> | -924.212754  | -924.005482  | -923.993134  | -924.042544  |
| <b>TS-62+BU</b> | -596.172101  | -595.928906  | -595.914522  | -595.967869  |
| <b>TS-63+BU</b> | -543.244930  | -542.972210  | -542.958256  | -543.010019  |
| <b>TS-64+BU</b> | -613.824363  | -613.620374  | -613.608684  | -613.656668  |
| <b>TS-65+BU</b> | -653.142109  | -652.910280  | -652.896916  | -652.948204  |
| <b>TS-66+BU</b> | -653.138117  | -652.906140  | -652.892950  | -652.943790  |
| <b>TS-67+BU</b> | -706.064331  | -705.861879  | -705.848295  | -705.900711  |
| <b>TS-68+BU</b> | -1073.418540 | -1073.224282 | -1073.211185 | -1073.262644 |
| <b>TS-69+BU</b> | -745.380045  | -745.149480  | -745.134434  | -745.189424  |
| <b>TS-70+BU</b> | -692.453577  | -692.193537  | -692.178866  | -692.232448  |

**Table S17.** B3LYP/6-31G\* energies (E), zero-point corrected energies (ZPE), enthalpies (H) and Gibbs free energies (G) computed for the products of the reactions between compounds **1-70** and **BU** (in au).

|                | <b>E</b>     | <b>ZPE</b>   | <b>H</b>     | <b>G</b>     |
|----------------|--------------|--------------|--------------|--------------|
| <b>P-1+BU</b>  | -326.887968  | -326.742284  | -326.734149  | -326.773741  |
| <b>P-2+BU</b>  | -347.964150  | -347.808243  | -347.799819  | -347.840306  |
| <b>P-3+BU</b>  | -374.607781  | -374.419123  | -374.408519  | -374.454013  |
| <b>P-4+BU</b>  | -439.150094  | -439.000015  | -438.991076  | -439.033661  |
| <b>P-5+BU</b>  | -571.689679  | -571.537349  | -571.527600  | -571.571512  |
| <b>P-6+BU</b>  | -338.735381  | -338.521428  | -338.509793  | -338.557907  |
| <b>P-7+BU</b>  | -1179.380031 | -1179.236629 | -1179.226525 | -1179.273162 |
| <b>P-8+BU</b>  | -807.560083  | -807.413507  | -807.403995  | -807.447102  |
| <b>P-9+BU</b>  | -387.277261  | -387.093452  | -387.083642  | -387.126851  |
| <b>P-10+BU</b> | -387.276723  | -387.092685  | -387.082805  | -387.126405  |
| <b>P-11+BU</b> | -440.198915  | -440.044442  | -440.034212  | -440.079228  |
| <b>P-12+BU</b> | -834.199844  | -834.020769  | -834.009017  | -834.057196  |
| <b>P-13+BU</b> | -413.921648  | -413.705114  | -413.693086  | -413.741230  |
| <b>P-14+BU</b> | -413.921800  | -413.704926  | -413.692909  | -413.741427  |
| <b>P-15+BU</b> | -466.840437  | -466.653306  | -466.640999  | -466.690606  |
| <b>P-16+BU</b> | -419.113607  | -418.969880  | -418.959966  | -419.003716  |
| <b>P-17+BU</b> | -419.120055  | -418.975883  | -418.966048  | -419.009916  |
| <b>P-18+BU</b> | -419.120497  | -418.976393  | -418.966495  | -419.010570  |
| <b>P-19+BU</b> | -366.202984  | -366.029248  | -366.019708  | -366.062345  |
| <b>P-20+BU</b> | -366.201529  | -366.027995  | -366.018486  | -366.060755  |
| <b>P-21+BU</b> | -685.000760  | -684.839435  | -684.827682  | -684.876835  |
| <b>P-22+BU</b> | -378.049708  | -377.807578  | -377.794554  | -377.845582  |
| <b>P-23+BU</b> | -1218.694237 | -1218.522694 | -1218.511195 | -1218.560466 |
| <b>P-24+BU</b> | -643.644625  | -643.491957  | -643.480501  | -643.529471  |
| <b>P-25+BU</b> | -611.775879  | -611.598156  | -611.586648  | -611.634965  |
| <b>P-26+BU</b> | -511.341315  | -511.199484  | -511.187727  | -511.235963  |
| <b>P-27+BU</b> | -405.514634  | -405.312953  | -405.302038  | -405.347258  |
| <b>P-28+BU</b> | -405.513823  | -405.311924  | -405.301065  | -405.346100  |
| <b>P-29+BU</b> | -458.435556  | -458.263520  | -458.252289  | -458.298719  |
| <b>P-30+BU</b> | -458.435108  | -458.263199  | -458.251921  | -458.298522  |
| <b>P-31+BU</b> | -426.588526  | -426.376416  | -426.365297  | -426.411368  |
| <b>P-32+BU</b> | -532.422288  | -532.270056  | -532.258003  | -532.307155  |
| <b>P-33+BU</b> | -603.558894  | -603.419436  | -603.405829  | -603.458038  |
| <b>P-34+BU</b> | -550.657190  | -550.487504  | -550.474375  | -550.524983  |
| <b>P-35+BU</b> | -571.736674  | -571.556421  | -571.543019  | -571.594454  |
| <b>P-36+BU</b> | -465.896749  | -465.656458  | -465.644085  | -465.692047  |
| <b>P-37+BU</b> | -598.375232  | -598.162617  | -598.146951  | -598.203396  |
| <b>P-38+BU</b> | -497.748427  | -497.548484  | -497.535841  | -497.584872  |
| <b>P-39+BU</b> | -497.745067  | -497.545036  | -497.532433  | -497.581349  |
| <b>P-40+BU</b> | -444.824298  | -444.594519  | -444.582365  | -444.629773  |
| <b>P-41+BU</b> | -386.048553  | -385.886750  | -385.878142  | -385.919390  |
| <b>P-42+BU</b> | -425.364914  | -425.175439  | -425.165225  | -425.209799  |
| <b>P-43+BU</b> | -425.364258  | -425.174913  | -425.164824  | -425.209258  |
| <b>P-44+BU</b> | -478.286960  | -478.126916  | -478.116532  | -478.161908  |
| <b>P-45+BU</b> | -845.644549  | -845.492377  | -845.482520  | -845.527042  |
| <b>P-46+BU</b> | -517.602855  | -517.415090  | -517.403111  | -517.451566  |
| <b>P-47+BU</b> | -464.677834  | -464.460368  | -464.448818  | -464.496158  |
| <b>P-48+BU</b> | -425.392059  | -425.199867  | -425.190530  | -425.233260  |
| <b>P-49+BU</b> | -464.706353  | -464.486278  | -464.475410  | -464.520984  |
| <b>P-50+BU</b> | -464.706927  | -464.487054  | -464.476300  | -464.521702  |
| <b>P-51+BU</b> | -517.629622  | -517.439187  | -517.428035  | -517.474906  |
| <b>P-52+BU</b> | -884.984491  | -884.801964  | -884.791386  | -884.837088  |
| <b>P-53+BU</b> | -556.941814  | -556.723559  | -556.710908  | -556.760395  |
| <b>P-54+BU</b> | -504.016636  | -503.768402  | -503.756269  | -503.804118  |
| <b>P-55+BU</b> | -535.342184  | -535.192142  | -535.182622  | -535.226393  |
| <b>P-56+BU</b> | -461.308890  | -461.139563  | -461.130513  | -461.173203  |
| <b>P-57+BU</b> | -464.709379  | -464.487392  | -464.477115  | -464.521759  |
| <b>P-58+BU</b> | -504.021015  | -503.771059  | -503.759379  | -503.806619  |
| <b>P-59+BU</b> | -504.022097  | -503.772329  | -503.760708  | -503.807779  |
| <b>P-60+BU</b> | -556.945321  | -556.725149  | -556.713047  | -556.761766  |
| <b>P-61+BU</b> | -924.299992  | -924.087892  | -924.076427  | -924.123896  |
| <b>P-62+BU</b> | -596.255802  | -596.007887  | -595.994320  | -596.045654  |
| <b>P-63+BU</b> | -543.329742  | -543.051754  | -543.038731  | -543.088379  |
| <b>P-64+BU</b> | -613.915026  | -613.705466  | -613.694579  | -613.741017  |
| <b>P-65+BU</b> | -653.219247  | -652.981820  | -652.969459  | -653.018742  |
| <b>P-66+BU</b> | -653.228024  | -652.990696  | -652.978381  | -653.027345  |
| <b>P-67+BU</b> | -706.149851  | -705.942197  | -705.929429  | -705.980008  |
| <b>P-68+BU</b> | -1073.499777 | -1073.299911 | -1073.287753 | -1073.337233 |
| <b>P-69+BU</b> | -745.454123  | -745.218124  | -745.204044  | -745.257002  |
| <b>P-70+BU</b> | -692.529802  | -692.263931  | -692.250347  | -692.301655  |



**Table S18.** B3LYP/6-31G\* energies (E), zero-point corrected energies (ZPE), enthalpies (H) and Gibbs free energies (G) computed for the transition structures of the reactions between compounds **1-70** and **DMB** (in au).

|           | E            | ZPE          | H            | G            |
|-----------|--------------|--------------|--------------|--------------|
| TS-1+DMB  | -405.426644  | -405.230797  | -405.218680  | -405.267320  |
| TS-2+DMB  | -426.507727  | -426.301220  | -426.288916  | -426.337943  |
| TS-3+DMB  | -453.163959  | -452.924742  | -452.910183  | -452.964748  |
| TS-4+DMB  | -517.691090  | -517.491134  | -517.478355  | -517.528715  |
| TS-5+DMB  | -650.219842  | -650.017499  | -650.003897  | -650.056220  |
| TS-6+DMB  | -417.289129  | -417.023372  | -417.008345  | -417.062623  |
| TS-7+DMB  | -1257.936608 | -1257.742450 | -1257.728439 | -1257.782509 |
| TS-8+DMB  | -886.104704  | -885.907372  | -885.893971  | -885.946069  |
| TS-9+DMB  | -465.826627  | -465.592226  | -465.578276  | -465.630981  |
| TS-10+DMB | -465.821614  | -465.586947  | -465.573131  | -465.625491  |
| TS-11+DMB | -518.748386  | -518.543095  | -518.529056  | -518.582460  |
| TS-12+DMB | -912.758342  | -912.528422  | -912.512776  | -912.570143  |
| TS-13+DMB | -492.483364  | -492.216178  | -492.199917  | -492.258469  |
| TS-14+DMB | -492.478238  | -492.210827  | -492.194739  | -492.252815  |
| TS-15+DMB | -545.397795  | -545.159951  | -545.143667  | -545.202378  |
| TS-16+DMB | -497.669507  | -497.475166  | -497.461079  | -497.514927  |
| TS-17+DMB | -497.664920  | -497.470387  | -497.456584  | -497.509469  |
| TS-18+DMB | -497.667651  | -497.472941  | -497.459222  | -497.511698  |
| TS-19+DMB | -444.741613  | -444.517789  | -444.504148  | -444.556074  |
| TS-20+DMB | -444.741483  | -444.517895  | -444.504098  | -444.556421  |
| TS-21+DMB | -763.544429  | -763.332930  | -763.317153  | -763.375083  |
| TS-22+DMB | -456.603365  | -456.309617  | -456.292993  | -456.350845  |
| TS-23+DMB | -1297.250969 | -1297.028560 | -1297.013089 | -1297.070090 |
| TS-24+DMB | -722.188452  | -721.985659  | -721.970379  | -722.027220  |
| TS-25+DMB | -690.328306  | -690.100383  | -690.084966  | -690.141612  |
| TS-26+DMB | -589.901317  | -589.708693  | -589.692811  | -589.751081  |
| TS-27+DMB | -484.055562  | -483.803456  | -483.788348  | -483.843161  |
| TS-28+DMB | -484.054370  | -483.802382  | -483.787172  | -483.842489  |
| TS-29+DMB | -536.981550  | -536.758927  | -536.743571  | -536.799588  |
| TS-30+DMB | -536.979679  | -536.757390  | -536.741927  | -536.798317  |
| TS-31+DMB | -505.132408  | -504.869262  | -504.854254  | -504.908649  |
| TS-32+DMB | -610.983764  | -610.780277  | -610.764138  | -610.822879  |
| TS-33+DMB | -682.122746  | -681.932348  | -681.914504  | -681.977304  |
| TS-34+DMB | -629.215152  | -628.994394  | -628.977103  | -629.037724  |
| TS-35+DMB | -650.299276  | -650.067499  | -650.050109  | -650.110675  |
| TS-36+DMB | -544.447903  | -544.156450  | -544.140046  | -544.197152  |
| TS-37+DMB | -676.942636  | -676.678500  | -676.658866  | -676.724419  |
| TS-38+DMB | -576.295044  | -576.044346  | -576.027513  | -576.086266  |
| TS-39+DMB | -576.291644  | -576.040832  | -576.024127  | -576.082459  |
| TS-40+DMB | -523.366668  | -523.086753  | -523.070160  | -523.128464  |
| TS-41+DMB | -464.586202  | -464.373579  | -464.361146  | -464.410636  |
| TS-42+DMB | -503.906969  | -503.666606  | -503.652381  | -503.705710  |
| TS-43+DMB | -503.901970  | -503.661522  | -503.647504  | -503.700332  |
| TS-44+DMB | -556.829538  | -556.618502  | -556.604177  | -556.658276  |
| TS-45+DMB | -924.186509  | -923.983125  | -923.969403  | -924.022313  |
| TS-46+DMB | -596.149613  | -595.910586  | -595.894514  | -595.952152  |
| TS-47+DMB | -543.222190  | -542.953754  | -542.938038  | -542.994214  |
| TS-48+DMB | -503.936238  | -503.693311  | -503.680091  | -503.731214  |
| TS-49+DMB | -543.255211  | -542.984251  | -542.969413  | -543.023795  |
| TS-50+DMB | -543.250790  | -542.980119  | -542.965299  | -543.019648  |
| TS-51+DMB | -596.178667  | -595.937448  | -595.922221  | -595.978344  |
| TS-52+DMB | -963.532025  | -963.298348  | -963.283845  | -963.338278  |
| TS-53+DMB | -635.496200  | -635.226813  | -635.210092  | -635.268702  |
| TS-54+DMB | -582.568717  | -582.269931  | -582.253598  | -582.310860  |
| TS-55+DMB | -613.892877  | -613.692536  | -613.679062  | -613.731286  |
| TS-56+DMB | -539.854485  | -539.635054  | -539.622196  | -539.672776  |
| TS-57+DMB | -543.250769  | -542.978387  | -542.964148  | -543.017396  |
| TS-58+DMB | -582.567886  | -582.267425  | -582.251599  | -582.307918  |
| TS-59+DMB | -582.564272  | -582.264009  | -582.248238  | -582.304588  |
| TS-60+DMB | -635.492418  | -635.221422  | -635.205304  | -635.262997  |
| TS-61+DMB | -1002.846794 | -1002.583674 | -1002.568199 | -1002.624431 |
| TS-62+DMB | -674.806186  | -674.507308  | -674.489650  | -674.550271  |
| TS-63+DMB | -621.878321  | -621.549447  | -621.532414  | -621.590794  |
| TS-64+DMB | -692.460244  | -692.200112  | -692.185371  | -692.239909  |
| TS-65+DMB | -731.778065  | -731.490128  | -731.473718  | -731.531564  |
| TS-66+DMB | -731.773896  | -731.485773  | -731.469537  | -731.526913  |
| TS-67+DMB | -784.701131  | -784.442735  | -784.425982  | -784.485353  |
| TS-68+DMB | -1152.055262 | -1151.804496 | -1151.788518 | -1151.846030 |
| TS-69+DMB | -824.016793  | -823.730276  | -823.712074  | -823.773885  |
| TS-70+DMB | -771.089778  | -770.773433  | -770.755801  | -770.815605  |

**Table S19.** B3LYP/6-31G\* energies (E), zero-point corrected energies (ZPE), enthalpies (H) and Gibbs free energies (G) computed for the products of the reactions between compounds **1-70** and **DMB** (in au).

|                 | <b>E</b>     | <b>ZPE</b>   | <b>H</b>     | <b>G</b>     |
|-----------------|--------------|--------------|--------------|--------------|
| <b>P-1+DMB</b>  | -405.523187  | -405.321544  | -405.310176  | -405.357090  |
| <b>P-2+DMB</b>  | -426.599100  | -426.387212  | -426.375561  | -426.423361  |
| <b>P-3+DMB</b>  | -453.242990  | -452.998457  | -452.984582  | -453.037478  |
| <b>P-4+DMB</b>  | -517.785500  | -517.579507  | -517.567316  | -517.617167  |
| <b>P-5+DMB</b>  | -650.324856  | -650.116582  | -650.103578  | -650.154735  |
| <b>P-6+DMB</b>  | -417.370230  | -417.100431  | -417.085498  | -417.141307  |
| <b>P-7+DMB</b>  | -1258.015175 | -1257.815804 | -1257.802436 | -1257.856313 |
| <b>P-8+DMB</b>  | -886.195432  | -885.992973  | -885.980145  | -886.030739  |
| <b>P-9+DMB</b>  | -465.912378  | -465.672784  | -465.659673  | -465.710352  |
| <b>P-10+DMB</b> | -465.911943  | -465.672112  | -465.658932  | -465.709989  |
| <b>P-11+DMB</b> | -518.834468  | -518.623976  | -518.610501  | -518.662737  |
| <b>P-12+DMB</b> | -912.835677  | -912.600793  | -912.585702  | -912.641396  |
| <b>P-13+DMB</b> | -492.557004  | -492.284597  | -492.269277  | -492.324846  |
| <b>P-14+DMB</b> | -492.553816  | -492.280692  | -492.265538  | -492.320921  |
| <b>P-15+DMB</b> | -545.476386  | -545.233318  | -545.217749  | -545.274732  |
| <b>P-16+DMB</b> | -497.749430  | -497.549781  | -497.536563  | -497.587802  |
| <b>P-17+DMB</b> | -497.755875  | -497.555751  | -497.542644  | -497.593859  |
| <b>P-18+DMB</b> | -497.756251  | -497.556232  | -497.543048  | -497.594470  |
| <b>P-19+DMB</b> | -444.838257  | -444.608667  | -444.595827  | -444.645879  |
| <b>P-20+DMB</b> | -444.836860  | -444.607489  | -444.594675  | -444.644435  |
| <b>P-21+DMB</b> | -763.636152  | -763.419011  | -763.403889  | -763.460687  |
| <b>P-22+DMB</b> | -456.684632  | -456.386844  | -456.370414  | -456.429577  |
| <b>P-23+DMB</b> | -1297.329435 | -1297.102043 | -1297.087232 | -1297.143892 |
| <b>P-24+DMB</b> | -722.280828  | -722.072304  | -722.057513  | -722.113912  |
| <b>P-25+DMB</b> | -690.411250  | -690.177721  | -690.162887  | -690.218682  |
| <b>P-26+DMB</b> | -589.977738  | -589.779965  | -589.764896  | -589.820513  |
| <b>P-27+DMB</b> | -484.150154  | -483.892552  | -483.878339  | -483.930938  |
| <b>P-28+DMB</b> | -484.149026  | -483.891445  | -483.877199  | -483.929833  |
| <b>P-29+DMB</b> | -537.071445  | -536.843472  | -536.828943  | -536.882802  |
| <b>P-30+DMB</b> | -537.070987  | -536.843188  | -536.828558  | -536.882684  |
| <b>P-31+DMB</b> | -505.223554  | -504.955523  | -504.941123  | -504.994486  |
| <b>P-32+DMB</b> | -611.058323  | -610.850231  | -610.834841  | -610.891443  |
| <b>P-33+DMB</b> | -682.195978  | -682.000619  | -681.983655  | -682.043350  |
| <b>P-34+DMB</b> | -629.293652  | -629.068012  | -629.051541  | -629.109628  |
| <b>P-35+DMB</b> | -650.372907  | -650.136839  | -650.120067  | -650.179041  |
| <b>P-36+DMB</b> | -544.531873  | -544.235640  | -544.219955  | -544.275274  |
| <b>P-37+DMB</b> | -677.012086  | -676.743423  | -676.724446  | -676.788253  |
| <b>P-38+DMB</b> | -576.384346  | -576.128564  | -576.112585  | -576.169060  |
| <b>P-39+DMB</b> | -576.380859  | -576.124779  | -576.108876  | -576.165097  |
| <b>P-40+DMB</b> | -523.459444  | -523.173623  | -523.158168  | -523.212881  |
| <b>P-41+DMB</b> | -464.684285  | -464.466510  | -464.454734  | -464.502996  |
| <b>P-42+DMB</b> | -504.000711  | -503.755309  | -503.741881  | -503.793527  |
| <b>P-43+DMB</b> | -504.000127  | -503.754709  | -503.741459  | -503.792631  |
| <b>P-44+DMB</b> | -556.923369  | -556.707438  | -556.693825  | -556.746248  |
| <b>P-45+DMB</b> | -924.280848  | -924.072747  | -924.059660  | -924.111188  |
| <b>P-46+DMB</b> | -596.239468  | -595.995736  | -595.980525  | -596.035989  |
| <b>P-47+DMB</b> | -543.313926  | -543.040625  | -543.025791  | -543.080092  |
| <b>P-48+DMB</b> | -504.026766  | -503.778660  | -503.766056  | -503.816180  |
| <b>P-49+DMB</b> | -543.341193  | -543.065194  | -543.051036  | -543.103987  |
| <b>P-50+DMB</b> | -543.341856  | -543.066064  | -543.052002  | -543.104831  |
| <b>P-51+DMB</b> | -596.264959  | -596.018675  | -596.004170  | -596.058718  |
| <b>P-52+DMB</b> | -963.619807  | -963.381495  | -963.367552  | -963.420882  |
| <b>P-53+DMB</b> | -635.577191  | -635.302924  | -635.286948  | -635.343879  |
| <b>P-54+DMB</b> | -582.651611  | -582.347728  | -582.332195  | -582.387665  |
| <b>P-55+DMB</b> | -613.979450  | -613.773415  | -613.760737  | -613.811564  |
| <b>P-56+DMB</b> | -539.945695  | -539.720466  | -539.708211  | -539.758203  |
| <b>P-57+DMB</b> | -543.344486  | -543.066725  | -543.053104  | -543.105325  |
| <b>P-58+DMB</b> | -582.656058  | -582.350140  | -582.335151  | -582.389802  |
| <b>P-59+DMB</b> | -582.657274  | -582.351748  | -582.336779  | -582.391321  |
| <b>P-60+DMB</b> | -635.580988  | -635.304982  | -635.289549  | -635.345725  |
| <b>P-61+DMB</b> | -1002.935464 | -1002.667387 | -1002.652626 | -1002.707397 |
| <b>P-62+DMB</b> | -674.891424  | -674.587247  | -674.570436  | -674.628918  |
| <b>P-63+DMB</b> | -621.965014  | -621.630797  | -621.614539  | -621.671278  |
| <b>P-64+DMB</b> | -692.550119  | -692.284733  | -692.270482  | -692.324613  |
| <b>P-65+DMB</b> | -731.857444  | -731.563978  | -731.548446  | -731.604424  |
| <b>P-66+DMB</b> | -731.863238  | -731.569841  | -731.554267  | -731.610402  |
| <b>P-67+DMB</b> | -784.785489  | -784.521939  | -784.505849  | -784.563868  |
| <b>P-68+DMB</b> | -1152.137274 | -1151.881583 | -1151.866183 | -1151.922487 |
| <b>P-69+DMB</b> | -824.089880  | -823.798058  | -823.780623  | -823.841179  |
| <b>P-70+DMB</b> | -771.165281  | -770.843574  | -770.826603  | -770.885601  |

**Table S20.** B3LYP/6-31G\* activation energies ( $\Delta E^\ddagger$ ), zero-point corrected energies ( $\Delta ZPE^\ddagger$ ), enthalpies ( $\Delta H^\ddagger$ ) and Gibbs free energies ( $\Delta G^\ddagger$ ) computed for the reactions between compounds **1-70** and **CP** (in kcal/mol).

|          | $\Delta E^\ddagger$ | $\Delta ZPE^\ddagger$ | $\Delta H^\ddagger$ | $\Delta G^\ddagger$ |
|----------|---------------------|-----------------------|---------------------|---------------------|
| TS-1+CP  | 16.4                | 18.4                  | 17.6                | 31.0                |
| TS-2+CP  | 16.3                | 18.4                  | 17.5                | 31.1                |
| TS-3+CP  | 10.3                | 12.4                  | 11.6                | 24.9                |
| TS-4+CP  | 12.1                | 14.1                  | 13.3                | 27.1                |
| TS-5+CP  | 17.5                | 19.3                  | 18.5                | 32.6                |
| TS-6+CP  | 15.6                | 18.0                  | 16.9                | 31.8                |
| TS-7+CP  | 12.6                | 14.7                  | 13.9                | 27.7                |
| TS-8+CP  | 16.1                | 18.0                  | 17.3                | 31.1                |
| TS-9+CP  | 19.8                | 21.7                  | 20.9                | 34.8                |
| TS-10+CP | 20.0                | 22.0                  | 21.1                | 35.1                |
| TS-11+CP | 14.9                | 16.8                  | 16.0                | 29.9                |
| TS-12+CP | 8.8                 | 10.7                  | 10.1                | 23.4                |
| TS-13+CP | 13.3                | 15.3                  | 14.6                | 28.1                |
| TS-14+CP | 16.3                | 18.4                  | 17.6                | 31.4                |
| TS-15+CP | 10.7                | 12.8                  | 12.0                | 25.7                |
| TS-16+CP | 9.3                 | 11.2                  | 10.6                | 24.0                |
| TS-17+CP | 15.3                | 17.1                  | 16.4                | 30.2                |
| TS-18+CP | 14.6                | 16.6                  | 15.7                | 29.6                |
| TS-19+CP | 21.5                | 23.4                  | 22.6                | 36.4                |
| TS-20+CP | 20.5                | 22.3                  | 21.6                | 35.3                |
| TS-21+CP | 14.5                | 16.4                  | 15.6                | 29.9                |
| TS-22+CP | 20.3                | 22.7                  | 21.6                | 36.9                |
| TS-23+CP | 18.1                | 20.1                  | 19.3                | 33.6                |
| TS-24+CP | 5.6                 | 7.7                   | 6.9                 | 21.6                |
| TS-25+CP | 12.1                | 14.0                  | 13.2                | 27.8                |
| TS-26+CP | 10.2                | 12.0                  | 11.4                | 25.2                |
| TS-27+CP | 24.8                | 26.5                  | 25.8                | 39.9                |
| TS-28+CP | 24.5                | 26.3                  | 25.5                | 39.8                |
| TS-29+CP | 19.1                | 20.9                  | 20.2                | 34.4                |
| TS-30+CP | 20.5                | 22.3                  | 21.5                | 35.7                |
| TS-31+CP | 24.9                | 26.9                  | 26.0                | 40.8                |
| TS-32+CP | 9.9                 | 11.7                  | 11.1                | 24.9                |
| TS-33+CP | 10.5                | 12.1                  | 11.5                | 25.8                |
| TS-34+CP | 16.8                | 18.6                  | 17.9                | 32.3                |
| TS-35+CP | 16.8                | 18.8                  | 18.0                | 32.8                |
| TS-36+CP | 27.0                | 29.0                  | 27.9                | 43.4                |
| TS-37+CP | 15.1                | 17.2                  | 16.5                | 31.0                |
| TS-38+CP | 24.2                | 26.1                  | 25.2                | 40.0                |
| TS-39+CP | 24.5                | 26.3                  | 25.4                | 40.5                |
| TS-40+CP | 28.5                | 30.3                  | 29.3                | 44.6                |
| TS-41+CP | 17.0                | 18.7                  | 17.9                | 31.6                |
| TS-42+CP | 20.9                | 22.6                  | 21.8                | 35.8                |
| TS-43+CP | 22.7                | 24.5                  | 23.6                | 37.9                |
| TS-44+CP | 15.1                | 16.7                  | 16.0                | 30.0                |
| TS-45+CP | 17.3                | 18.9                  | 18.2                | 32.0                |
| TS-46+CP | 20.2                | 21.8                  | 21.1                | 35.7                |
| TS-47+CP | 26.3                | 27.9                  | 27.1                | 41.6                |
| TS-48+CP | 21.4                | 23.3                  | 22.5                | 36.6                |
| TS-49+CP | 25.7                | 27.6                  | 26.7                | 41.4                |
| TS-50+CP | 26.8                | 28.8                  | 27.9                | 42.8                |
| TS-51+CP | 20.2                | 22.1                  | 21.3                | 35.7                |
| TS-52+CP | 22.8                | 24.7                  | 23.9                | 38.3                |
| TS-53+CP | 25.7                | 27.6                  | 26.8                | 41.9                |
| TS-54+CP | 30.2                | 32.3                  | 31.2                | 47.4                |
| TS-55+CP | 12.2                | 14.0                  | 13.3                | 27.1                |
| TS-56+CP | 19.6                | 21.6                  | 20.8                | 34.7                |
| TS-57+CP | 23.2                | 25.1                  | 24.4                | 38.5                |
| TS-58+CP | 28.9                | 30.7                  | 29.9                | 44.2                |
| TS-59+CP | 28.8                | 30.6                  | 29.8                | 44.4                |
| TS-60+CP | 22.2                | 23.9                  | 23.2                | 37.5                |
| TS-61+CP | 25.8                | 27.6                  | 27.0                | 41.2                |
| TS-62+CP | 29.0                | 30.8                  | 30.0                | 44.8                |
| TS-63+CP | 33.2                | 35.1                  | 34.2                | 49.5                |
| TS-64+CP | 17.4                | 19.1                  | 18.5                | 32.4                |
| TS-65+CP | 22.7                | 24.5                  | 23.8                | 38.1                |
| TS-66+CP | 23.3                | 25.2                  | 24.4                | 39.0                |
| TS-67+CP | 16.0                | 17.7                  | 17.1                | 31.4                |
| TS-68+CP | 19.4                | 21.1                  | 20.5                | 34.6                |
| TS-69+CP | 22.6                | 24.4                  | 23.7                | 38.5                |
| TS-70+CP | 27.4                | 29.3                  | 28.3                | 44.2                |

**Table S21.** B3LYP/6-31G\* reaction energies ( $\Delta E_{\text{rxn}}$ ), zero-point corrected energies ( $\Delta ZPE_{\text{rxn}}$ ), enthalpies ( $\Delta H_{\text{rxn}}$ ) and Gibbs free energies ( $\Delta G_{\text{rxn}}$ ) computed for the reactions between compounds **1-70** and **CP** (in kcal/mol).

|         | $\Delta E_{\text{rxn}}$ | $\Delta ZPE_{\text{rxn}}$ | $\Delta H_{\text{rxn}}$ | $\Delta G_{\text{rxn}}$ |
|---------|-------------------------|---------------------------|-------------------------|-------------------------|
| P-1+CP  | -22.1                   | -16.7                     | -18.2                   | -3.4                    |
| P-2+CP  | -18.6                   | -13.5                     | -14.9                   | -0.4                    |
| P-3+CP  | -18.9                   | -13.8                     | -15.1                   | -0.7                    |
| P-4+CP  | -24.5                   | -19.3                     | -20.6                   | -6.3                    |
| P-5+CP  | -24.9                   | -19.7                     | -21.0                   | -5.8                    |
| P-6+CP  | -15.8                   | -11.1                     | -12.5                   | 2.7                     |
| P-7+CP  | -16.6                   | -11.8                     | -13.1                   | 1.3                     |
| P-8+CP  | -17.5                   | -12.8                     | -14.0                   | 1.0                     |
| P-9+CP  | -13.3                   | -8.5                      | -9.9                    | 5.4                     |
| P-10+CP | -14.8                   | -10.0                     | -11.3                   | 3.6                     |
| P-11+CP | -16.7                   | -12.0                     | -13.2                   | 1.3                     |
| P-12+CP | -17.8                   | -13.1                     | -14.3                   | 0.6                     |
| P-13+CP | -13.4                   | -8.5                      | -9.9                    | 5.4                     |
| P-14+CP | -12.8                   | -7.9                      | -9.2                    | 5.6                     |
| P-15+CP | -17.1                   | -12.2                     | -13.4                   | 1.1                     |
| P-16+CP | -19.9                   | -15.1                     | -16.3                   | -1.3                    |
| P-17+CP | -19.4                   | -14.7                     | -15.9                   | -0.9                    |
| P-18+CP | -20.4                   | -15.4                     | -16.8                   | -1.8                    |
| P-19+CP | -17.0                   | -11.9                     | -13.4                   | 1.8                     |
| P-20+CP | -17.4                   | -12.4                     | -13.8                   | 1.6                     |
| P-21+CP | -20.8                   | -16.0                     | -17.2                   | -2.0                    |
| P-22+CP | -10.7                   | -6.1                      | -7.5                    | 8.1                     |
| P-23+CP | -10.7                   | -6.0                      | -7.3                    | 7.5                     |
| P-24+CP | -31.2                   | -26.0                     | -27.3                   | -12.0                   |
| P-25+CP | -16.4                   | -11.6                     | -12.7                   | 2.4                     |
| P-26+CP | -17.2                   | -12.9                     | -14.0                   | 1.2                     |
| P-27+CP | -12.4                   | -7.6                      | -9.0                    | 6.8                     |
| P-28+CP | -12.2                   | -7.3                      | -8.8                    | 7.3                     |
| P-29+CP | -14.4                   | -9.7                      | -11.1                   | 4.6                     |
| P-30+CP | -14.0                   | -9.3                      | -10.6                   | 5.0                     |
| P-31+CP | -9.0                    | -4.3                      | -5.8                    | 9.9                     |
| P-32+CP | -14.5                   | -10.3                     | -11.3                   | 3.5                     |
| P-33+CP | -13.4                   | -9.5                      | -10.5                   | 5.0                     |
| P-34+CP | -9.7                    | -5.4                      | -6.7                    | 9.3                     |
| P-35+CP | -6.3                    | -2.0                      | -3.3                    | 12.6                    |
| P-36+CP | -4.7                    | 0.0                       | -1.7                    | 15.4                    |
| P-37+CP | -6.7                    | -2.3                      | -3.5                    | 12.0                    |
| P-38+CP | -8.4                    | -3.9                      | -5.3                    | 11.0                    |
| P-39+CP | -8.4                    | -3.7                      | -5.3                    | 11.5                    |
| P-40+CP | -6.5                    | -1.7                      | -3.4                    | 13.6                    |
| P-41+CP | -21.6                   | -17.0                     | -18.4                   | -3.4                    |
| P-42+CP | -16.9                   | -12.4                     | -13.8                   | 1.9                     |
| P-43+CP | -15.0                   | -10.6                     | -12.0                   | 3.6                     |
| P-44+CP | -20.7                   | -16.4                     | -17.6                   | -2.4                    |
| P-45+CP | -20.6                   | -16.3                     | -17.4                   | -2.2                    |
| P-46+CP | -14.7                   | -10.5                     | -11.8                   | 4.2                     |
| P-47+CP | -10.2                   | -5.8                      | -7.3                    | 9.1                     |
| P-48+CP | -12.8                   | -8.1                      | -9.3                    | 5.8                     |
| P-49+CP | -8.1                    | -3.4                      | -4.8                    | 11.2                    |
| P-50+CP | -6.3                    | -1.7                      | -3.1                    | 12.7                    |
| P-51+CP | -10.8                   | -6.4                      | -7.6                    | 7.8                     |
| P-52+CP | -12.3                   | -7.8                      | -9.0                    | 6.3                     |
| P-53+CP | -4.3                    | 0.1                       | -1.3                    | 15.2                    |
| P-54+CP | -1.2                    | 3.7                       | 2.0                     | 19.7                    |
| P-55+CP | -21.5                   | -16.7                     | -17.9                   | -3.0                    |
| P-56+CP | -17.1                   | -12.1                     | -13.3                   | 1.5                     |
| P-57+CP | -12.6                   | -8.0                      | -9.2                    | 5.8                     |
| P-58+CP | -7.6                    | -3.1                      | -4.4                    | 11.2                    |
| P-59+CP | -5.5                    | -0.9                      | -2.2                    | 13.1                    |
| P-60+CP | -10.6                   | -6.4                      | -7.5                    | 7.6                     |
| P-61+CP | -13.8                   | -9.3                      | -10.4                   | 5.0                     |
| P-62+CP | -3.8                    | 0.4                       | -0.9                    | 15.1                    |
| P-63+CP | -0.6                    | 4.0                       | 2.5                     | 19.0                    |
| P-64+CP | -17.9                   | -13.3                     | -14.4                   | 0.6                     |
| P-65+CP | -12.7                   | -8.1                      | -9.4                    | 6.4                     |
| P-66+CP | -8.6                    | -3.9                      | -5.2                    | 10.5                    |
| P-67+CP | -14.5                   | -10.2                     | -11.3                   | 4.1                     |
| P-68+CP | -16.7                   | -12.3                     | -13.3                   | 1.9                     |
| P-69+CP | -7.5                    | -3.2                      | -4.5                    | 11.8                    |
| P-70+CP | -3.6                    | 1.2                       | -0.4                    | 16.9                    |

**Table S22.** B3LYP/6-31G\* activation energies ( $\Delta E^\ddagger$ ), zero-point corrected energies ( $\Delta ZPE^\ddagger$ ), enthalpies ( $\Delta H^\ddagger$ ) and Gibbs free energies ( $\Delta G^\ddagger$ ) computed for the reactions between compounds **1-70** and **CH** (in kcal/mol).

|          | $\Delta E^\ddagger$ | $\Delta ZPE^\ddagger$ | $\Delta H^\ddagger$ | $\Delta G^\ddagger$ |
|----------|---------------------|-----------------------|---------------------|---------------------|
| TS-1+CH  | 21.1                | 22.9                  | 22.1                | 35.5                |
| TS-2+CH  | 20.4                | 22.3                  | 21.5                | 35.1                |
| TS-3+CH  | 13.9                | 15.9                  | 15.2                | 28.4                |
| TS-4+CH  | 16.4                | 18.3                  | 17.5                | 31.4                |
| TS-5+CH  | 22.3                | 23.9                  | 23.2                | 37.1                |
| TS-6+CH  | 19.1                | 21.3                  | 20.3                | 35.5                |
| TS-7+CH  | 16.5                | 18.4                  | 17.7                | 31.6                |
| TS-8+CH  | 20.0                | 21.7                  | 21.1                | 34.9                |
| TS-9+CH  | 24.0                | 25.8                  | 25.0                | 39.2                |
| TS-10+CH | 23.3                | 25.3                  | 24.4                | 38.8                |
| TS-11+CH | 19.2                | 21.0                  | 20.2                | 34.2                |
| TS-12+CH | 11.7                | 13.5                  | 12.9                | 26.4                |
| TS-13+CH | 17.1                | 18.8                  | 18.2                | 31.5                |
| TS-14+CH | 20.6                | 22.5                  | 21.8                | 35.5                |
| TS-15+CH | 14.6                | 16.5                  | 15.8                | 29.6                |
| TS-16+CH | 13.2                | 14.9                  | 14.5                | 27.7                |
| TS-17+CH | 19.9                | 21.5                  | 20.9                | 34.6                |
| TS-18+CH | 19.3                | 21.0                  | 20.3                | 34.1                |
| TS-19+CH | 27.0                | 28.8                  | 28.0                | 42.1                |
| TS-20+CH | 25.5                | 27.2                  | 26.5                | 40.3                |
| TS-21+CH | 20.1                | 21.7                  | 21.0                | 35.4                |
| TS-22+CH | 24.5                | 26.8                  | 25.8                | 41.3                |
| TS-23+CH | 22.8                | 24.7                  | 24.0                | 38.4                |
| TS-24+CH | 10.0                | 11.9                  | 11.2                | 26.1                |
| TS-25+CH | 17.0                | 18.6                  | 17.9                | 32.3                |
| TS-26+CH | 14.3                | 15.7                  | 15.3                | 28.9                |
| TS-27+CH | 29.9                | 31.6                  | 30.8                | 45.4                |
| TS-28+CH | 30.6                | 32.3                  | 31.5                | 45.7                |
| TS-29+CH | 24.1                | 25.7                  | 25.0                | 39.2                |
| TS-30+CH | 25.8                | 27.4                  | 26.7                | 41.2                |
| TS-31+CH | 29.1                | 31.0                  | 30.1                | 45.0                |
| TS-32+CH | 14.1                | 15.6                  | 15.1                | 28.8                |
| TS-33+CH | 14.6                | 16.0                  | 15.5                | 29.8                |
| TS-34+CH | 21.9                | 23.4                  | 22.8                | 37.2                |
| TS-35+CH | 21.8                | 23.6                  | 22.8                | 38.0                |
| TS-36+CH | 32.2                | 34.3                  | 33.2                | 49.3                |
| TS-37+CH | 19.3                | 21.3                  | 20.6                | 35.3                |
| TS-38+CH | 29.9                | 31.5                  | 30.7                | 45.7                |
| TS-39+CH | 30.9                | 32.5                  | 31.7                | 46.7                |
| TS-40+CH | 35.1                | 36.7                  | 35.8                | 51.1                |
| TS-41+CH | 20.6                | 22.0                  | 21.3                | 35.1                |
| TS-42+CH | 24.7                | 26.1                  | 25.4                | 39.6                |
| TS-43+CH | 27.5                | 29.0                  | 28.3                | 42.6                |
| TS-44+CH | 19.1                | 20.5                  | 19.9                | 33.9                |
| TS-45+CH | 20.7                | 22.1                  | 21.6                | 35.3                |
| TS-46+CH | 24.6                | 26.2                  | 25.4                | 40.4                |
| TS-47+CH | 31.1                | 32.6                  | 31.8                | 46.7                |
| TS-48+CH | 25.2                | 26.8                  | 26.1                | 40.2                |
| TS-49+CH | 29.9                | 31.7                  | 30.8                | 45.8                |
| TS-50+CH | 32.2                | 33.9                  | 33.0                | 47.8                |
| TS-51+CH | 24.5                | 26.1                  | 25.4                | 39.8                |
| TS-52+CH | 26.9                | 28.5                  | 27.9                | 42.3                |
| TS-53+CH | 30.9                | 32.6                  | 31.8                | 47.1                |
| TS-54+CH | 36.3                | 38.2                  | 37.2                | 53.6                |
| TS-55+CH | 15.7                | 17.3                  | 16.7                | 30.6                |
| TS-56+CH | 23.6                | 25.2                  | 24.6                | 38.4                |
| TS-57+CH | 26.8                | 28.5                  | 27.8                | 42.1                |
| TS-58+CH | 32.7                | 34.5                  | 33.7                | 48.7                |
| TS-59+CH | 33.9                | 35.7                  | 34.9                | 49.6                |
| TS-60+CH | 26.6                | 28.2                  | 27.6                | 42.0                |
| TS-61+CH | 29.8                | 31.3                  | 30.7                | 45.2                |
| TS-62+CH | 34.2                | 36.0                  | 35.1                | 50.4                |
| TS-63+CH | 38.8                | 40.6                  | 39.6                | 55.4                |
| TS-64+CH | 21.4                | 22.9                  | 22.3                | 36.4                |
| TS-65+CH | 26.9                | 28.5                  | 27.8                | 42.5                |
| TS-66+CH | 28.6                | 30.2                  | 29.5                | 44.2                |
| TS-67+CH | 20.3                | 21.8                  | 21.2                | 35.5                |
| TS-68+CH | 23.4                | 24.8                  | 24.3                | 38.5                |
| TS-69+CH | 27.7                | 29.3                  | 28.6                | 43.7                |
| TS-70+CH | 33.1                | 34.9                  | 34.0                | 49.9                |

**Table S23.** B3LYP/6-31G\* reaction energies ( $\Delta E_{\text{rxn}}$ ), zero-point corrected energies ( $\Delta ZPE_{\text{rxn}}$ ), enthalpies ( $\Delta H_{\text{rxn}}$ ) and Gibbs free energies ( $\Delta G_{\text{rxn}}$ ) computed for the reactions between compounds **1-70** and **CH** (in kcal/mol).

|         | $\Delta E_{\text{rxn}}$ | $\Delta ZPE_{\text{rxn}}$ | $\Delta H_{\text{rxn}}$ | $\Delta G_{\text{rxn}}$ |
|---------|-------------------------|---------------------------|-------------------------|-------------------------|
| P-1+CH  | -28.8                   | -23.5                     | -24.9                   | -10.1                   |
| P-2+CH  | -25.5                   | -20.6                     | -21.9                   | -7.5                    |
| P-3+CH  | -25.7                   | -20.6                     | -21.9                   | -7.4                    |
| P-4+CH  | -32.6                   | -27.3                     | -28.6                   | -13.8                   |
| P-5+CH  | -32.5                   | -27.3                     | -28.7                   | -13.2                   |
| P-6+CH  | -22.3                   | -17.5                     | -18.9                   | -3.4                    |
| P-7+CH  | -22.9                   | -18.2                     | -19.4                   | -4.9                    |
| P-8+CH  | -24.2                   | -19.6                     | -20.7                   | -5.7                    |
| P-9+CH  | -19.7                   | -15.0                     | -16.4                   | -1.0                    |
| P-10+CH | -21.3                   | -16.5                     | -17.8                   | -2.8                    |
| P-11+CH | -25.8                   | -21.1                     | -22.4                   | -7.3                    |
| P-12+CH | -24.3                   | -19.6                     | -20.7                   | -5.7                    |
| P-13+CH | -19.6                   | -14.7                     | -16.0                   | -0.6                    |
| P-14+CH | -19.0                   | -14.1                     | -15.4                   | -0.4                    |
| P-15+CH | -23.8                   | -18.9                     | -20.0                   | -5.4                    |
| P-16+CH | -26.1                   | -21.4                     | -22.6                   | -7.4                    |
| P-17+CH | -25.2                   | -20.5                     | -21.7                   | -6.7                    |
| P-18+CH | -26.9                   | -21.9                     | -23.2                   | -8.1                    |
| P-19+CH | -23.2                   | -18.1                     | -19.5                   | -4.1                    |
| P-20+CH | -23.4                   | -18.4                     | -19.7                   | -4.2                    |
| P-21+CH | -27.3                   | -22.6                     | -23.8                   | -8.7                    |
| P-22+CH | -16.6                   | -11.8                     | -13.3                   | 2.9                     |
| P-23+CH | -16.5                   | -11.9                     | -13.1                   | 1.8                     |
| P-24+CH | -39.3                   | -34.1                     | -35.3                   | -20.7                   |
| P-25+CH | -21.6                   | -17.0                     | -18.0                   | -3.1                    |
| P-26+CH | -22.6                   | -18.3                     | -19.4                   | -4.0                    |
| P-27+CH | -17.9                   | -13.1                     | -14.6                   | 1.4                     |
| P-28+CH | -16.9                   | -11.9                     | -13.5                   | 2.8                     |
| P-29+CH | -20.2                   | -15.6                     | -16.9                   | -1.1                    |
| P-30+CH | -19.1                   | -14.5                     | -15.8                   | -0.1                    |
| P-31+CH | -14.9                   | -10.2                     | -11.7                   | 4.2                     |
| P-32+CH | -20.3                   | -16.1                     | -17.1                   | -2.2                    |
| P-33+CH | -18.2                   | -14.3                     | -15.4                   | 0.3                     |
| P-34+CH | -13.9                   | -9.6                      | -10.9                   | 5.3                     |
| P-35+CH | -11.1                   | -6.9                      | -8.2                    | 8.1                     |
| P-36+CH | -9.1                    | -4.2                      | -6.0                    | 11.5                    |
| P-37+CH | -11.5                   | -7.1                      | -8.3                    | 7.6                     |
| P-38+CH | -13.1                   | -8.5                      | -10.0                   | 6.7                     |
| P-39+CH | -11.8                   | -7.1                      | -8.7                    | 8.0                     |
| P-40+CH | -10.5                   | -5.4                      | -7.2                    | 10.3                    |
| P-41+CH | -32.2                   | -27.6                     | -28.9                   | -13.8                   |
| P-42+CH | -26.4                   | -22.1                     | -23.4                   | -7.5                    |
| P-43+CH | -24.4                   | -20.1                     | -21.5                   | -5.7                    |
| P-44+CH | -30.6                   | -26.4                     | -27.6                   | -12.1                   |
| P-45+CH | -31.1                   | -26.9                     | -28.1                   | -12.5                   |
| P-46+CH | -23.4                   | -19.4                     | -20.7                   | -4.3                    |
| P-47+CH | -18.2                   | -13.8                     | -15.3                   | 1.5                     |
| P-48+CH | -21.7                   | -17.0                     | -18.3                   | -3.0                    |
| P-49+CH | -16.1                   | -11.5                     | -12.9                   | 3.4                     |
| P-50+CH | -14.1                   | -9.4                      | -10.9                   | 5.3                     |
| P-51+CH | -19.0                   | -14.7                     | -15.8                   | -0.2                    |
| P-52+CH | -21.4                   | -17.0                     | -18.2                   | -2.5                    |
| P-53+CH | -11.2                   | -6.8                      | -8.2                    | 8.6                     |
| P-54+CH | -7.1                    | -2.2                      | -4.0                    | 14.0                    |
| P-55+CH | -31.3                   | -26.5                     | -27.7                   | -12.6                   |
| P-56+CH | -26.4                   | -21.5                     | -22.6                   | -7.7                    |
| P-57+CH | -19.9                   | -15.5                     | -16.7                   | -1.7                    |
| P-58+CH | -13.9                   | -9.4                      | -10.7                   | 5.2                     |
| P-59+CH | -11.4                   | -6.9                      | -8.2                    | 7.3                     |
| P-60+CH | -17.2                   | -13.0                     | -14.1                   | 1.2                     |
| P-61+CH | -21.1                   | -16.6                     | -17.8                   | -2.0                    |
| P-62+CH | -9.2                    | -4.8                      | -6.2                    | 10.3                    |
| P-63+CH | -5.2                    | -0.5                      | -2.2                    | 15.0                    |
| P-64+CH | -25.2                   | -20.7                     | -21.8                   | -6.7                    |
| P-65+CH | -19.0                   | -14.3                     | -15.6                   | 0.4                     |
| P-66+CH | -14.6                   | -10.0                     | -11.3                   | 4.6                     |
| P-67+CH | -21.2                   | -16.9                     | -18.0                   | -2.3                    |
| P-68+CH | -24.2                   | -19.8                     | -20.9                   | -5.3                    |
| P-69+CH | -13.0                   | -8.6                      | -9.9                    | 6.7                     |
| P-70+CH | -8.4                    | -3.3                      | -5.0                    | 13.0                    |

**Table S24.** B3LYP/6-31G\* activation energies ( $\Delta E^\ddagger$ ), zero-point corrected energies ( $\Delta ZPE^\ddagger$ ), enthalpies ( $\Delta H^\ddagger$ ) and Gibbs free energies ( $\Delta G^\ddagger$ ) computed for the reactions between compounds **1-70** and **BU** (in kcal/mol).

|                 | $\Delta E^\ddagger$ | $\Delta ZPE^\ddagger$ | $\Delta H^\ddagger$ | $\Delta G^\ddagger$ |
|-----------------|---------------------|-----------------------|---------------------|---------------------|
| <b>TS-1+BU</b>  | 20.4                | 22.5                  | 21.4                | 34.8                |
| <b>TS-2+BU</b>  | 19.4                | 21.4                  | 20.4                | 33.9                |
| <b>TS-3+BU</b>  | 13.7                | 15.7                  | 14.8                | 28.0                |
| <b>TS-4+BU</b>  | 16.3                | 18.4                  | 17.4                | 31.4                |
| <b>TS-5+BU</b>  | 21.3                | 23.1                  | 22.1                | 36.2                |
| <b>TS-6+BU</b>  | 16.2                | 18.6                  | 17.4                | 32.6                |
| <b>TS-7+BU</b>  | 14.7                | 16.8                  | 15.8                | 29.9                |
| <b>TS-8+BU</b>  | 17.5                | 19.4                  | 18.6                | 32.3                |
| <b>TS-9+BU</b>  | 21.0                | 22.8                  | 22.0                | 35.4                |
| <b>TS-10+BU</b> | 23.2                | 25.2                  | 24.1                | 38.1                |
| <b>TS-11+BU</b> | 19.3                | 21.2                  | 20.2                | 34.0                |
| <b>TS-12+BU</b> | 10.5                | 12.5                  | 11.7                | 25.3                |
| <b>TS-13+BU</b> | 14.9                | 16.6                  | 16.0                | 28.5                |
| <b>TS-14+BU</b> | 19.9                | 22.0                  | 21.0                | 34.6                |
| <b>TS-15+BU</b> | 15.6                | 17.8                  | 16.9                | 30.5                |
| <b>TS-16+BU</b> | 14.4                | 16.3                  | 15.6                | 28.8                |
| <b>TS-17+BU</b> | 20.4                | 22.2                  | 21.3                | 35.0                |
| <b>TS-18+BU</b> | 19.4                | 21.3                  | 20.3                | 34.0                |
| <b>TS-19+BU</b> | 25.0                | 27.0                  | 26.0                | 39.8                |
| <b>TS-20+BU</b> | 23.6                | 25.4                  | 24.5                | 38.1                |
| <b>TS-21+BU</b> | 18.5                | 20.3                  | 19.3                | 33.7                |
| <b>TS-22+BU</b> | 21.0                | 23.5                  | 22.2                | 37.8                |
| <b>TS-23+BU</b> | 20.3                | 22.3                  | 21.3                | 35.6                |
| <b>TS-24+BU</b> | 9.9                 | 12.0                  | 11.1                | 25.7                |
| <b>TS-25+BU</b> | 17.0                | 18.9                  | 17.9                | 32.3                |
| <b>TS-26+BU</b> | 16.2                | 18.0                  | 17.2                | 30.9                |
| <b>TS-27+BU</b> | 27.6                | 29.4                  | 28.5                | 42.5                |
| <b>TS-28+BU</b> | 27.6                | 29.5                  | 28.5                | 42.8                |
| <b>TS-29+BU</b> | 24.3                | 26.2                  | 25.3                | 39.4                |
| <b>TS-30+BU</b> | 24.7                | 26.5                  | 25.6                | 39.7                |
| <b>TS-31+BU</b> | 27.8                | 29.7                  | 28.6                | 43.2                |
| <b>TS-32+BU</b> | 15.8                | 17.5                  | 16.8                | 30.4                |
| <b>TS-33+BU</b> | 17.5                | 19.2                  | 18.4                | 32.5                |
| <b>TS-34+BU</b> | 22.5                | 24.3                  | 23.4                | 37.6                |
| <b>TS-35+BU</b> | 21.6                | 23.5                  | 22.5                | 37.3                |
| <b>TS-36+BU</b> | 27.4                | 29.5                  | 28.2                | 44.1                |
| <b>TS-37+BU</b> | 19.4                | 21.5                  | 20.6                | 35.1                |
| <b>TS-38+BU</b> | 28.5                | 30.3                  | 29.3                | 44.0                |
| <b>TS-39+BU</b> | 28.3                | 30.3                  | 29.2                | 44.2                |
| <b>TS-40+BU</b> | 31.2                | 33.1                  | 31.9                | 47.2                |
| <b>TS-41+BU</b> | 19.1                | 20.8                  | 19.9                | 33.6                |
| <b>TS-42+BU</b> | 21.2                | 22.7                  | 21.8                | 35.8                |
| <b>TS-43+BU</b> | 25.4                | 27.0                  | 26.1                | 40.1                |
| <b>TS-44+BU</b> | 18.9                | 20.5                  | 19.7                | 33.6                |
| <b>TS-45+BU</b> | 18.0                | 19.6                  | 18.8                | 32.6                |
| <b>TS-46+BU</b> | 22.7                | 24.3                  | 23.4                | 38.1                |
| <b>TS-47+BU</b> | 27.3                | 28.9                  | 27.9                | 42.5                |
| <b>TS-48+BU</b> | 24.0                | 26.0                  | 25.0                | 39.1                |
| <b>TS-49+BU</b> | 26.1                | 28.1                  | 27.0                | 41.6                |
| <b>TS-50+BU</b> | 29.3                | 31.2                  | 30.1                | 44.9                |
| <b>TS-51+BU</b> | 24.0                | 25.9                  | 25.0                | 39.4                |
| <b>TS-52+BU</b> | 23.8                | 25.6                  | 24.8                | 38.9                |
| <b>TS-53+BU</b> | 28.4                | 30.3                  | 29.2                | 44.4                |
| <b>TS-54+BU</b> | 31.2                | 33.2                  | 32.0                | 48.2                |
| <b>TS-55+BU</b> | 15.7                | 17.6                  | 16.7                | 30.6                |
| <b>TS-56+BU</b> | 22.8                | 24.8                  | 23.9                | 37.7                |
| <b>TS-57+BU</b> | 25.5                | 27.4                  | 26.4                | 40.6                |
| <b>TS-58+BU</b> | 27.7                | 29.5                  | 28.6                | 42.9                |
| <b>TS-59+BU</b> | 30.5                | 32.4                  | 31.4                | 46.0                |
| <b>TS-60+BU</b> | 25.9                | 27.7                  | 26.8                | 41.1                |
| <b>TS-61+BU</b> | 24.6                | 26.7                  | 25.8                | 40.2                |
| <b>TS-62+BU</b> | 30.6                | 32.6                  | 31.5                | 46.5                |
| <b>TS-63+BU</b> | 32.0                | 34.0                  | 32.8                | 48.4                |
| <b>TS-64+BU</b> | 20.5                | 22.3                  | 21.4                | 35.5                |
| <b>TS-65+BU</b> | 23.1                | 24.8                  | 23.9                | 38.3                |
| <b>TS-66+BU</b> | 25.9                | 27.7                  | 26.8                | 41.4                |
| <b>TS-67+BU</b> | 20.2                | 22.0                  | 21.2                | 35.4                |
| <b>TS-68+BU</b> | 20.0                | 21.6                  | 20.9                | 34.9                |
| <b>TS-69+BU</b> | 25.3                | 27.2                  | 26.2                | 41.2                |
| <b>TS-70+BU</b> | 27.7                | 29.7                  | 28.5                | 44.4                |



**Table S25.** B3LYP/6-31G\* reaction energies ( $\Delta E_{\text{rxn}}$ ), zero-point corrected energies ( $\Delta ZPE_{\text{rxn}}$ ), enthalpies ( $\Delta H_{\text{rxn}}$ ) and Gibbs free energies ( $\Delta G_{\text{rxn}}$ ) computed for the reactions between compounds **1-70** and **BU** (in kcal/mol).

|                | $\Delta E_{\text{rxn}}$ | $\Delta ZPE_{\text{rxn}}$ | $\Delta H_{\text{rxn}}$ | $\Delta G_{\text{rxn}}$ |
|----------------|-------------------------|---------------------------|-------------------------|-------------------------|
| <b>P-1+BU</b>  | -40.3                   | -34.6                     | -36.1                   | -21.5                   |
| <b>P-2+BU</b>  | -37.7                   | -32.2                     | -33.7                   | -19.2                   |
| <b>P-3+BU</b>  | -36.7                   | -31.2                     | -32.6                   | -18.3                   |
| <b>P-4+BU</b>  | -44.0                   | -38.1                     | -39.5                   | -25.2                   |
| <b>P-5+BU</b>  | -44.7                   | -38.9                     | -40.4                   | -25.3                   |
| <b>P-6+BU</b>  | -33.9                   | -28.7                     | -30.2                   | -15.1                   |
| <b>P-7+BU</b>  | -34.6                   | -29.3                     | -30.7                   | -16.5                   |
| <b>P-8+BU</b>  | -39.3                   | -34.0                     | -35.3                   | -20.3                   |
| <b>P-9+BU</b>  | -32.4                   | -27.2                     | -28.7                   | -13.6                   |
| <b>P-10+BU</b> | -32.9                   | -27.6                     | -29.2                   | -14.2                   |
| <b>P-11+BU</b> | -34.5                   | -29.3                     | -30.7                   | -16.0                   |
| <b>P-12+BU</b> | -38.7                   | -33.3                     | -34.6                   | -19.8                   |
| <b>P-13+BU</b> | -31.9                   | -26.6                     | -28.1                   | -13.0                   |
| <b>P-14+BU</b> | -30.3                   | -24.9                     | -26.4                   | -11.5                   |
| <b>P-15+BU</b> | -34.5                   | -29.2                     | -30.6                   | -15.8                   |
| <b>P-16+BU</b> | -36.9                   | -31.6                     | -33.0                   | -17.9                   |
| <b>P-17+BU</b> | -37.6                   | -32.2                     | -33.6                   | -18.6                   |
| <b>P-18+BU</b> | -36.7                   | -31.3                     | -32.8                   | -17.9                   |
| <b>P-19+BU</b> | -35.7                   | -30.2                     | -31.8                   | -16.6                   |
| <b>P-20+BU</b> | -36.3                   | -30.9                     | -32.4                   | -17.1                   |
| <b>P-21+BU</b> | -38.8                   | -33.5                     | -34.9                   | -19.6                   |
| <b>P-22+BU</b> | -29.1                   | -23.9                     | -25.5                   | -10.0                   |
| <b>P-23+BU</b> | -28.9                   | -23.7                     | -25.2                   | -10.3                   |
| <b>P-24+BU</b> | -49.1                   | -43.2                     | -44.7                   | -29.4                   |
| <b>P-25+BU</b> | -36.0                   | -30.5                     | -32.0                   | -16.6                   |
| <b>P-26+BU</b> | -33.7                   | -28.8                     | -30.1                   | -14.9                   |
| <b>P-27+BU</b> | -31.1                   | -25.8                     | -27.4                   | -11.6                   |
| <b>P-28+BU</b> | -32.0                   | -26.5                     | -28.2                   | -12.0                   |
| <b>P-29+BU</b> | -32.2                   | -26.9                     | -28.5                   | -12.8                   |
| <b>P-30+BU</b> | -33.4                   | -28.2                     | -29.7                   | -14.1                   |
| <b>P-31+BU</b> | -28.6                   | -23.4                     | -25.1                   | -9.4                    |
| <b>P-32+BU</b> | -32.2                   | -27.6                     | -28.8                   | -13.8                   |
| <b>P-33+BU</b> | -30.4                   | -25.8                     | -27.1                   | -11.5                   |
| <b>P-34+BU</b> | -28.7                   | -23.9                     | -25.4                   | -9.4                    |
| <b>P-35+BU</b> | -25.6                   | -20.8                     | -22.3                   | -6.3                    |
| <b>P-36+BU</b> | -24.4                   | -19.2                     | -21.1                   | -3.9                    |
| <b>P-37+BU</b> | -25.5                   | -20.7                     | -22.0                   | -6.4                    |
| <b>P-38+BU</b> | -27.4                   | -22.2                     | -23.9                   | -7.5                    |
| <b>P-39+BU</b> | -28.6                   | -23.3                     | -25.1                   | -8.2                    |
| <b>P-40+BU</b> | -26.7                   | -21.2                     | -23.1                   | -6.1                    |
| <b>P-41+BU</b> | -40.9                   | -35.9                     | -37.3                   | -22.8                   |
| <b>P-42+BU</b> | -36.1                   | -31.3                     | -32.8                   | -17.7                   |
| <b>P-43+BU</b> | -34.6                   | -29.9                     | -31.4                   | -16.5                   |
| <b>P-44+BU</b> | -38.8                   | -34.1                     | -35.4                   | -20.7                   |
| <b>P-45+BU</b> | -39.8                   | -35.2                     | -36.5                   | -21.8                   |
| <b>P-46+BU</b> | -32.1                   | -27.6                     | -29.1                   | -13.4                   |
| <b>P-47+BU</b> | -28.6                   | -23.8                     | -25.4                   | -9.6                    |
| <b>P-48+BU</b> | -31.7                   | -26.5                     | -28.0                   | -12.9                   |
| <b>P-49+BU</b> | -26.8                   | -21.5                     | -23.1                   | -7.2                    |
| <b>P-50+BU</b> | -26.6                   | -21.5                     | -23.1                   | -7.3                    |
| <b>P-51+BU</b> | -29.3                   | -24.3                     | -25.8                   | -10.3                   |
| <b>P-52+BU</b> | -30.5                   | -25.4                     | -26.8                   | -11.4                   |
| <b>P-53+BU</b> | -21.5                   | -16.6                     | -18.2                   | -1.8                    |
| <b>P-54+BU</b> | -19.6                   | -14.2                     | -16.1                   | 1.6                     |
| <b>P-55+BU</b> | -38.0                   | -32.5                     | -33.9                   | -19.2                   |
| <b>P-56+BU</b> | -33.0                   | -27.4                     | -28.7                   | -14.3                   |
| <b>P-57+BU</b> | -32.1                   | -26.7                     | -28.2                   | -12.9                   |
| <b>P-58+BU</b> | -26.6                   | -21.3                     | -22.9                   | -7.0                    |
| <b>P-59+BU</b> | -26.5                   | -21.3                     | -22.9                   | -6.9                    |
| <b>P-60+BU</b> | -28.8                   | -23.8                     | -25.2                   | -9.6                    |
| <b>P-61+BU</b> | -30.1                   | -25.0                     | -26.5                   | -10.9                   |
| <b>P-62+BU</b> | -21.9                   | -17.0                     | -18.5                   | -2.3                    |
| <b>P-63+BU</b> | -21.3                   | -15.9                     | -17.7                   | -0.8                    |
| <b>P-64+BU</b> | -36.4                   | -31.1                     | -32.5                   | -17.4                   |
| <b>P-65+BU</b> | -25.3                   | -20.1                     | -21.6                   | -6.0                    |
| <b>P-66+BU</b> | -30.5                   | -25.3                     | -26.8                   | -11.1                   |
| <b>P-67+BU</b> | -33.4                   | -28.4                     | -29.7                   | -14.3                   |
| <b>P-68+BU</b> | -31.0                   | -25.8                     | -27.1                   | -11.9                   |
| <b>P-69+BU</b> | -21.2                   | -15.9                     | -17.5                   | -1.2                    |
| <b>P-70+BU</b> | -20.1                   | -14.4                     | -16.3                   | 1.0                     |

**Table S26.** B3LYP/6-31G\* activation energies ( $\Delta E^\ddagger$ ), zero-point corrected energies ( $\Delta ZPE^\ddagger$ ), enthalpies ( $\Delta H^\ddagger$ ) and Gibbs free energies ( $\Delta G^\ddagger$ ) computed for the reactions between compounds **1-70** and **DMB** (in kcal/mol).

|           | $\Delta E^\ddagger$ | $\Delta ZPE^\ddagger$ | $\Delta H^\ddagger$ | $\Delta G^\ddagger$ |
|-----------|---------------------|-----------------------|---------------------|---------------------|
| TS-1+DMB  | 19.9                | 21.2                  | 20.6                | 33.6                |
| TS-2+DMB  | 19.5                | 20.8                  | 20.2                | 33.3                |
| TS-3+DMB  | 12.6                | 13.8                  | 13.4                | 26.0                |
| TS-4+DMB  | 14.8                | 16.1                  | 15.5                | 28.9                |
| TS-5+DMB  | 20.9                | 22.1                  | 21.5                | 35.3                |
| TS-6+DMB  | 16.9                | 18.7                  | 17.8                | 32.9                |
| TS-7+DMB  | 14.4                | 15.6                  | 15.1                | 28.6                |
| TS-8+DMB  | 17.2                | 18.5                  | 18.0                | 31.3                |
| TS-9+DMB  | 21.1                | 22.1                  | 21.7                | 34.8                |
| TS-10+DMB | 23.4                | 24.5                  | 23.9                | 37.4                |
| TS-11+DMB | 18.9                | 20.1                  | 19.6                | 32.9                |
| TS-12+DMB | 9.1                 | 10.4                  | 10.1                | 23.1                |
| TS-13+DMB | 13.9                | 15.0                  | 14.7                | 27.1                |
| TS-14+DMB | 18.8                | 20.0                  | 19.5                | 32.4                |
| TS-15+DMB | 14.0                | 15.2                  | 14.8                | 27.8                |
| TS-16+DMB | 12.5                | 13.7                  | 13.4                | 26.0                |
| TS-17+DMB | 18.8                | 19.8                  | 19.4                | 32.7                |
| TS-18+DMB | 18.2                | 19.5                  | 18.8                | 32.4                |
| TS-19+DMB | 24.5                | 25.6                  | 25.0                | 38.3                |
| TS-20+DMB | 23.1                | 24.0                  | 23.7                | 36.6                |
| TS-21+DMB | 18.2                | 19.2                  | 18.7                | 32.5                |
| TS-22+DMB | 21.7                | 23.3                  | 22.5                | 37.7                |
| TS-23+DMB | 20.0                | 21.2                  | 20.7                | 34.6                |
| TS-24+DMB | 7.9                 | 9.3                   | 8.7                 | 23.0                |
| TS-25+DMB | 15.5                | 16.6                  | 16.1                | 30.2                |
| TS-26+DMB | 13.1                | 14.0                  | 13.7                | 26.6                |
| TS-27+DMB | 27.7                | 28.7                  | 28.2                | 42.0                |
| TS-28+DMB | 27.1                | 28.1                  | 27.5                | 41.2                |
| TS-29+DMB | 23.5                | 24.5                  | 24.1                | 37.7                |
| TS-30+DMB | 23.1                | 24.0                  | 23.6                | 37.0                |
| TS-31+DMB | 28.3                | 29.6                  | 28.9                | 43.3                |
| TS-32+DMB | 13.7                | 14.6                  | 14.4                | 27.3                |
| TS-33+DMB | 14.0                | 14.7                  | 14.5                | 27.4                |
| TS-34+DMB | 19.4                | 20.3                  | 20.0                | 33.6                |
| TS-35+DMB | 19.6                | 20.8                  | 20.3                | 34.5                |
| TS-36+DMB | 28.0                | 29.4                  | 28.5                | 43.9                |
| TS-37+DMB | 16.7                | 17.9                  | 17.5                | 31.4                |
| TS-38+DMB | 27.9                | 28.9                  | 28.4                | 42.6                |
| TS-39+DMB | 26.6                | 27.9                  | 27.2                | 42.1                |
| TS-40+DMB | 31.2                | 32.2                  | 31.6                | 45.8                |
| TS-41+DMB | 19.9                | 21.0                  | 20.4                | 33.7                |
| TS-42+DMB | 22.0                | 22.8                  | 22.3                | 35.8                |
| TS-43+DMB | 26.2                | 27.0                  | 26.5                | 40.1                |
| TS-44+DMB | 19.0                | 19.7                  | 19.4                | 32.6                |
| TS-45+DMB | 18.3                | 19.2                  | 18.8                | 32.2                |
| TS-46+DMB | 23.0                | 23.8                  | 23.4                | 37.2                |
| TS-47+DMB | 28.1                | 28.9                  | 28.4                | 42.6                |
| TS-48+DMB | 25.0                | 26.2                  | 25.6                | 39.4                |
| TS-49+DMB | 27.1                | 28.3                  | 27.7                | 42.1                |
| TS-50+DMB | 30.4                | 31.4                  | 30.8                | 45.0                |
| TS-51+DMB | 24.4                | 25.3                  | 24.9                | 38.5                |
| TS-52+DMB | 24.2                | 25.4                  | 24.9                | 38.9                |
| TS-53+DMB | 28.8                | 29.9                  | 29.3                | 44.0                |
| TS-54+DMB | 32.2                | 33.4                  | 32.6                | 48.3                |
| TS-55+DMB | 14.7                | 15.8                  | 15.4                | 28.7                |
| TS-56+DMB | 22.9                | 24.0                  | 23.5                | 36.9                |
| TS-57+DMB | 26.4                | 27.5                  | 27.0                | 40.8                |
| TS-58+DMB | 28.5                | 29.5                  | 29.0                | 43.2                |
| TS-59+DMB | 31.5                | 32.5                  | 32.0                | 46.1                |
| TS-60+DMB | 26.1                | 27.1                  | 26.7                | 40.6                |
| TS-61+DMB | 25.0                | 26.2                  | 25.7                | 39.8                |
| TS-62+DMB | 31.0                | 31.9                  | 31.4                | 45.8                |
| TS-63+DMB | 32.7                | 34.1                  | 33.3                | 48.7                |
| TS-64+DMB | 19.7                | 20.8                  | 20.3                | 34.3                |
| TS-65+DMB | 22.2                | 23.3                  | 22.8                | 37.0                |
| TS-66+DMB | 25.2                | 26.3                  | 25.8                | 40.2                |
| TS-67+DMB | 18.9                | 19.8                  | 19.5                | 33.3                |
| TS-68+DMB | 18.7                | 19.9                  | 19.4                | 33.6                |
| TS-69+DMB | 23.9                | 25.0                  | 24.5                | 39.2                |
| TS-70+DMB | 26.7                | 28.2                  | 27.3                | 43.2                |

**Table S27.** B3LYP/6-31G\* reaction energies ( $\Delta E_{\text{rxn}}$ ), zero-point corrected energies ( $\Delta ZPE_{\text{rxn}}$ ), enthalpies ( $\Delta H_{\text{rxn}}$ ) and Gibbs free energies ( $\Delta G_{\text{rxn}}$ ) computed for the reactions between compounds **1-70** and **DMB** (in kcal/mol).

|          | $\Delta E_{\text{rxn}}$ | $\Delta ZPE_{\text{rxn}}$ | $\Delta H_{\text{rxn}}$ | $\Delta G_{\text{rxn}}$ |
|----------|-------------------------|---------------------------|-------------------------|-------------------------|
| P-1+DMB  | -40.7                   | -35.7                     | -36.8                   | -22.8                   |
| P-2+DMB  | -37.9                   | -33.2                     | -34.2                   | -20.3                   |
| P-3+DMB  | -37.0                   | -32.4                     | -33.3                   | -19.6                   |
| P-4+DMB  | -44.4                   | -39.4                     | -40.3                   | -26.6                   |
| P-5+DMB  | -45.0                   | -40.1                     | -41.1                   | -26.5                   |
| P-6+DMB  | -34.0                   | -29.7                     | -30.6                   | -16.4                   |
| P-7+DMB  | -34.9                   | -30.5                     | -31.3                   | -17.7                   |
| P-8+DMB  | -39.7                   | -35.3                     | -36.0                   | -21.8                   |
| P-9+DMB  | -32.7                   | -28.4                     | -29.4                   | -15.0                   |
| P-10+DMB | -33.3                   | -28.9                     | -29.9                   | -15.6                   |
| P-11+DMB | -35.1                   | -30.6                     | -31.5                   | -17.4                   |
| P-12+DMB | -39.4                   | -35.0                     | -35.7                   | -21.6                   |
| P-13+DMB | -32.3                   | -28.0                     | -28.8                   | -14.5                   |
| P-14+DMB | -28.6                   | -23.9                     | -24.9                   | -10.4                   |
| P-15+DMB | -35.4                   | -30.8                     | -31.7                   | -17.6                   |
| P-16+DMB | -37.6                   | -33.2                     | -34.0                   | -19.7                   |
| P-17+DMB | -38.3                   | -33.8                     | -34.6                   | -20.3                   |
| P-18+DMB | -37.4                   | -32.8                     | -33.8                   | -19.6                   |
| P-19+DMB | -36.1                   | -31.4                     | -32.5                   | -18.0                   |
| P-20+DMB | -36.8                   | -32.2                     | -33.2                   | -18.6                   |
| P-21+DMB | -39.3                   | -34.8                     | -35.7                   | -21.3                   |
| P-22+DMB | -29.3                   | -25.1                     | -26.0                   | -11.7                   |
| P-23+DMB | -29.3                   | -25.0                     | -25.8                   | -11.7                   |
| P-24+DMB | -50.0                   | -45.1                     | -45.9                   | -31.4                   |
| P-25+DMB | -36.5                   | -31.9                     | -32.8                   | -18.1                   |
| P-26+DMB | -34.9                   | -30.7                     | -31.5                   | -17.0                   |
| P-27+DMB | -31.7                   | -27.2                     | -28.3                   | -13.1                   |
| P-28+DMB | -32.3                   | -27.8                     | -28.9                   | -13.6                   |
| P-29+DMB | -33.0                   | -28.5                     | -29.5                   | -14.5                   |
| P-30+DMB | -34.2                   | -29.8                     | -30.7                   | -15.9                   |
| P-31+DMB | -28.9                   | -24.5                     | -25.6                   | -10.5                   |
| P-32+DMB | -33.1                   | -29.3                     | -30.0                   | -15.7                   |
| P-33+DMB | -31.9                   | -28.2                     | -28.9                   | -14.0                   |
| P-34+DMB | -29.9                   | -25.8                     | -26.7                   | -11.5                   |
| P-35+DMB | -26.6                   | -22.7                     | -23.6                   | -8.4                    |
| P-36+DMB | -24.7                   | -20.3                     | -21.7                   | -5.1                    |
| P-37+DMB | -26.9                   | -22.8                     | -23.6                   | -8.7                    |
| P-38+DMB | -28.2                   | -23.9                     | -25.0                   | -9.4                    |
| P-39+DMB | -29.3                   | -24.8                     | -26.0                   | -9.8                    |
| P-40+DMB | -27.0                   | -22.3                     | -23.7                   | -7.2                    |
| P-41+DMB | -41.6                   | -37.4                     | -38.3                   | -24.3                   |
| P-42+DMB | -36.9                   | -32.9                     | -33.9                   | -19.3                   |
| P-43+DMB | -35.4                   | -31.4                     | -32.4                   | -17.8                   |
| P-44+DMB | -39.9                   | -36.1                     | -36.9                   | -22.6                   |
| P-45+DMB | -40.9                   | -37.1                     | -37.8                   | -23.6                   |
| P-46+DMB | -33.4                   | -29.7                     | -30.6                   | -15.4                   |
| P-47+DMB | -29.5                   | -25.6                     | -26.7                   | -11.3                   |
| P-48+DMB | -31.8                   | -27.4                     | -28.3                   | -13.9                   |
| P-49+DMB | -26.9                   | -22.5                     | -23.5                   | -8.2                    |
| P-50+DMB | -26.8                   | -22.5                     | -23.6                   | -8.5                    |
| P-51+DMB | -29.7                   | -25.7                     | -26.5                   | -11.9                   |
| P-52+DMB | -30.9                   | -26.8                     | -27.6                   | -13.0                   |
| P-53+DMB | -22.0                   | -17.8                     | -18.9                   | -3.2                    |
| P-54+DMB | -19.8                   | -15.4                     | -16.7                   | 0.1                     |
| P-55+DMB | -39.6                   | -35.0                     | -35.9                   | -21.6                   |
| P-56+DMB | -34.3                   | -29.6                     | -30.4                   | -16.7                   |
| P-57+DMB | -32.4                   | -27.9                     | -28.8                   | -14.4                   |
| P-58+DMB | -26.9                   | -22.4                     | -23.4                   | -8.2                    |
| P-59+DMB | -26.8                   | -22.6                     | -23.6                   | -8.4                    |
| P-60+DMB | -29.5                   | -25.3                     | -26.2                   | -11.3                   |
| P-61+DMB | -30.6                   | -26.4                     | -27.2                   | -12.3                   |
| P-62+DMB | -22.5                   | -18.2                     | -19.2                   | -3.6                    |
| P-63+DMB | -21.7                   | -16.9                     | -18.2                   | -1.8                    |
| P-64+DMB | -36.7                   | -32.3                     | -33.1                   | -18.9                   |
| P-65+DMB | -27.6                   | -23.1                     | -24.1                   | -8.8                    |
| P-66+DMB | -30.9                   | -26.4                     | -27.4                   | -12.2                   |
| P-67+DMB | -34.1                   | -29.9                     | -30.6                   | -16.0                   |
| P-68+DMB | -32.8                   | -28.5                     | -29.3                   | -14.4                   |
| P-69+DMB | -21.9                   | -17.5                     | -18.5                   | -3.1                    |
| P-70+DMB | -20.6                   | -15.9                     | -17.1                   | -0.7                    |

**Table S28.** CBS-QB3 energies (E), zero-point corrected energies (ZPE), enthalpies (H) and Gibbs free energies (G) computed for CP and the selected 35 dienophiles (in au).

|           | <b>E</b>     | <b>ZPE</b>   | <b>H</b>     | <b>G</b>     |
|-----------|--------------|--------------|--------------|--------------|
| <b>CP</b> | -193.708562  | -193.712750  | -193.707618  | -193.739359  |
| <b>4</b>  | -282.702682  | -282.707419  | -282.701738  | -282.735245  |
| <b>7</b>  | -1022.211461 | -1022.217253 | -1022.210516 | -1022.247754 |
| <b>10</b> | -230.822710  | -230.828546  | -230.821766  | -230.857308  |
| <b>11</b> | -283.712308  | -283.718269  | -283.711364  | -283.747761  |
| <b>14</b> | -257.372209  | -257.380180  | -257.371265  | -257.411710  |
| <b>15</b> | -310.252800  | -310.260909  | -310.251856  | -310.293180  |
| <b>17</b> | -262.649031  | -262.654605  | -262.648086  | -262.683865  |
| <b>18</b> | -262.650416  | -262.656172  | -262.649472  | -262.685221  |
| <b>19</b> | -209.765473  | -209.771090  | -209.764529  | -209.799342  |
| <b>21</b> | -528.343410  | -528.351004  | -528.342466  | -528.384000  |
| <b>22</b> | -221.493064  | -221.502079  | -221.492119  | -221.535709  |
| <b>23</b> | -1061.443129 | -1061.450479 | -1061.442185 | -1061.483248 |
| <b>24</b> | -486.978477  | -486.985755  | -486.977532  | -487.019194  |
| <b>25</b> | -455.127977  | -455.135298  | -455.127033  | -455.168020  |
| <b>26</b> | -354.756433  | -354.763752  | -354.755489  | -354.795884  |
| <b>28</b> | -248.993483  | -249.000631  | -248.992538  | -249.031481  |
| <b>29</b> | -301.883800  | -301.890976  | -301.882856  | -301.922314  |
| <b>30</b> | -301.881562  | -301.888712  | -301.880618  | -301.920037  |
| <b>31</b> | -270.053642  | -270.060966  | -270.052698  | -270.092060  |
| <b>32</b> | -375.820224  | -375.827807  | -375.819280  | -375.860342  |
| <b>36</b> | -309.280259  | -309.289244  | -309.279315  | -309.323204  |
| <b>40</b> | -288.224823  | -288.233637  | -288.223879  | -288.267038  |
| <b>41</b> | -229.609311  | -229.613667  | -229.608367  | -229.640657  |
| <b>42</b> | -268.842995  | -268.849060  | -268.842051  | -268.878681  |
| <b>43</b> | -268.842804  | -268.848099  | -268.841860  | -268.876790  |
| <b>44</b> | -321.728886  | -321.734892  | -321.727941  | -321.764881  |
| <b>45</b> | -688.771637  | -688.777038  | -688.770692  | -688.806611  |
| <b>47</b> | -308.077658  | -308.085389  | -308.076714  | -308.117375  |
| <b>48</b> | -268.877251  | -268.882465  | -268.876307  | -268.911147  |
| <b>49</b> | -308.110135  | -308.117092  | -308.109190  | -308.148253  |
| <b>50</b> | -308.110769  | -308.117632  | -308.109825  | -308.148563  |
| <b>52</b> | -728.037520  | -728.043876  | -728.036576  | -728.074980  |
| <b>55</b> | -378.781562  | -378.786783  | -378.780617  | -378.815879  |
| <b>56</b> | -304.807071  | -304.811767  | -304.806127  | -304.839750  |
| <b>57</b> | -308.104965  | -308.111125  | -308.104021  | -308.141084  |

**Table S29.** CBS-QB3 energies (E), zero-point corrected energies (ZPE), enthalpies (H) and Gibbs free energies (G) computed for the transition structures of the reactions between the selected 35 dienophiles and **CP** (in au).

|                 | <b>E</b>     | <b>ZPE</b>   | <b>H</b>     | <b>G</b>     |
|-----------------|--------------|--------------|--------------|--------------|
| <b>TS-4+CP</b>  | -476.398238  | -476.406744  | -476.397293  | -476.440385  |
| <b>TS-7+CP</b>  | -1215.908433 | -1215.918170 | -1215.907489 | -1215.954465 |
| <b>TS-10+CP</b> | -424.511678  | -424.521244  | -424.510734  | -424.555672  |
| <b>TS-11+CP</b> | -477.409238  | -477.419053  | -477.408294  | -477.454433  |
| <b>TS-14+CP</b> | -451.063784  | -451.075594  | -451.062840  | -451.113040  |
| <b>TS-15+CP</b> | -503.955496  | -503.967556  | -503.954552  | -504.005832  |
| <b>TS-17+CP</b> | -456.345245  | -456.354803  | -456.344301  | -456.389808  |
| <b>TS-18+CP</b> | -456.347421  | -456.356962  | -456.346477  | -456.391895  |
| <b>TS-19+CP</b> | -403.450695  | -403.460075  | -403.449751  | -403.494262  |
| <b>TS-21+CP</b> | -722.039120  | -722.050615  | -722.038176  | -722.088619  |
| <b>TS-22+CP</b> | -415.184179  | -415.196739  | -415.183235  | -415.234572  |
| <b>TS-23+CP</b> | -1255.136518 | -1255.147790 | -1255.135574 | -1255.185684 |
| <b>TS-24+CP</b> | -680.687873  | -680.698917  | -680.686929  | -680.736562  |
| <b>TS-25+CP</b> | -648.830219  | -648.841431  | -648.829275  | -648.878714  |
| <b>TS-26+CP</b> | -548.459086  | -548.470548  | -548.458142  | -548.508162  |
| <b>TS-28+CP</b> | -442.678001  | -442.688994  | -442.677057  | -442.724883  |
| <b>TS-29+CP</b> | -495.577896  | -495.588981  | -495.576952  | -495.625443  |
| <b>TS-30+CP</b> | -495.573401  | -495.584537  | -495.572457  | -495.621044  |
| <b>TS-31+CP</b> | -463.738573  | -463.749423  | -463.737628  | -463.784925  |
| <b>TS-32+CP</b> | -569.523751  | -569.535512  | -569.522807  | -569.573579  |
| <b>TS-36+CP</b> | -502.965648  | -502.978018  | -502.964704  | -503.015082  |
| <b>TS-40+CP</b> | -481.907749  | -481.920042  | -481.906805  | -481.956967  |
| <b>TS-41+CP</b> | -423.301150  | -423.309342  | -423.300206  | -423.342391  |
| <b>TS-42+CP</b> | -462.531473  | -462.541425  | -462.530528  | -462.576593  |
| <b>TS-43+CP</b> | -462.531422  | -462.541118  | -462.530478  | -462.575631  |
| <b>TS-44+CP</b> | -515.427902  | -515.437897  | -515.426957  | -515.473414  |
| <b>TS-45+CP</b> | -882.464364  | -882.473815  | -882.463420  | -882.509056  |
| <b>TS-47+CP</b> | -501.762539  | -501.774062  | -501.761595  | -501.810693  |
| <b>TS-48+CP</b> | -462.564802  | -462.573837  | -462.563858  | -462.607909  |
| <b>TS-49+CP</b> | -501.793955  | -501.804656  | -501.793011  | -501.840503  |
| <b>TS-50+CP</b> | -501.794476  | -501.804942  | -501.793532  | -501.840206  |
| <b>TS-52+CP</b> | -921.725582  | -921.735833  | -921.724638  | -921.771709  |
| <b>TS-55+CP</b> | -572.483212  | -572.492480  | -572.482268  | -572.527292  |
| <b>TS-56+CP</b> | -498.496278  | -498.504897  | -498.495333  | -498.538653  |
| <b>TS-57+CP</b> | -501.789729  | -501.799805  | -501.788785  | -501.835145  |

**Table S30.** CBS-QB3 activation energies ( $\Delta E^\ddagger$ ), zero-point corrected energies ( $\Delta ZPE^\ddagger$ ), enthalpies ( $\Delta H^\ddagger$ ) and Gibbs free energies ( $\Delta G^\ddagger$ ) computed for the reactions between the selected 35 dienophiles and **CP** (in kcal/mol).

|          | $\Delta E^\ddagger$ | $\Delta ZPE^\ddagger$ | $\Delta H^\ddagger$ | $\Delta G^\ddagger$ |
|----------|---------------------|-----------------------|---------------------|---------------------|
| TS-4+CP  | 8.2                 | 8.4                   | 7.6                 | 21.5                |
| TS-7+CP  | 7.3                 | 7.4                   | 6.7                 | 20.5                |
| TS-10+CP | 12.3                | 12.6                  | 11.7                | 25.7                |
| TS-11+CP | 7.3                 | 7.5                   | 6.7                 | 20.5                |
| TS-14+CP | 10.7                | 10.9                  | 10.1                | 23.9                |
| TS-15+CP | 3.7                 | 3.8                   | 3.1                 | 16.8                |
| TS-17+CP | 7.7                 | 7.9                   | 7.2                 | 21.0                |
| TS-18+CP | 7.3                 | 7.5                   | 6.7                 | 20.5                |
| TS-19+CP | 14.6                | 14.9                  | 14.1                | 27.9                |
| TS-21+CP | 8.1                 | 8.2                   | 7.5                 | 21.8                |
| TS-22+CP | 10.9                | 11.4                  | 10.4                | 25.4                |
| TS-23+CP | 9.5                 | 9.7                   | 8.9                 | 23.2                |
| TS-24+CP | -0.5                | -0.3                  | -1.1                | 13.8                |
| TS-25+CP | 4.0                 | 4.2                   | 3.4                 | 18.0                |
| TS-26+CP | 3.7                 | 3.7                   | 3.1                 | 17.0                |
| TS-28+CP | 15.1                | 15.3                  | 14.5                | 28.8                |
| TS-29+CP | 9.1                 | 9.3                   | 8.5                 | 22.7                |
| TS-30+CP | 10.5                | 10.6                  | 9.9                 | 24.1                |
| TS-31+CP | 14.8                | 15.2                  | 14.2                | 29.2                |
| TS-32+CP | 3.2                 | 3.2                   | 2.6                 | 16.4                |
| TS-36+CP | 14.5                | 15.0                  | 13.9                | 29.8                |
| TS-40+CP | 16.1                | 16.5                  | 15.5                | 31.0                |
| TS-41+CP | 10.5                | 10.7                  | 9.9                 | 23.6                |
| TS-42+CP | 12.6                | 12.8                  | 12.0                | 26.0                |
| TS-43+CP | 12.5                | 12.4                  | 11.9                | 25.4                |
| TS-44+CP | 6.0                 | 6.1                   | 5.4                 | 19.3                |
| TS-45+CP | 9.9                 | 10.0                  | 9.3                 | 23.2                |
| TS-47+CP | 14.9                | 15.1                  | 14.3                | 28.9                |
| TS-48+CP | 13.2                | 13.4                  | 12.6                | 26.7                |
| TS-49+CP | 15.5                | 15.8                  | 14.9                | 29.6                |
| TS-50+CP | 15.6                | 16.0                  | 15.0                | 29.9                |
| TS-52+CP | 12.9                | 13.0                  | 12.3                | 26.8                |
| TS-55+CP | 4.3                 | 4.4                   | 3.7                 | 17.5                |
| TS-56+CP | 12.1                | 12.3                  | 11.6                | 25.4                |
| TS-57+CP | 14.9                | 15.1                  | 14.3                | 28.4                |

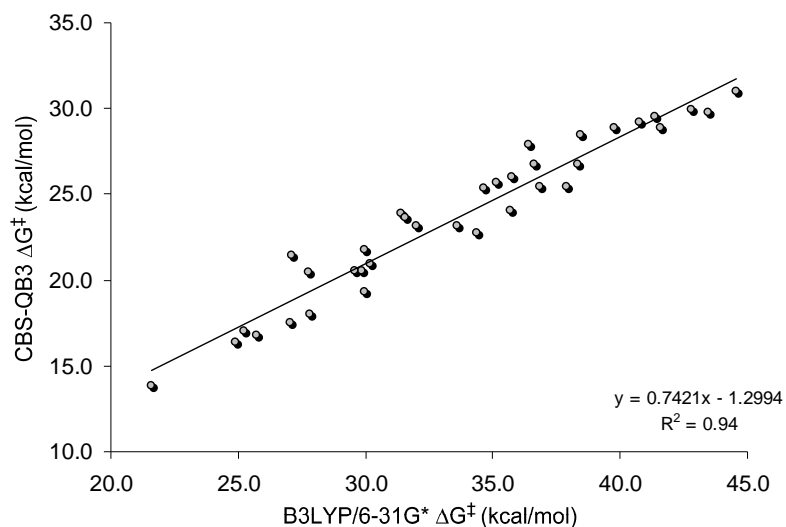

**Figure S6.** Plot of CBS-QB3  $\Delta G^\ddagger$  versus B3LYP/6-31G\*  $\Delta G^\ddagger$  correspondig to the reactions between the 35 selected dienophiles and **CP**.

**Table S31.** M06-2X/6-31G\* energies (E), zero-point corrected energies (ZPE), enthalpies (H) and Gibbs free energies (G) computed for CP and the selected 35 dienophiles (in au).

|    | E            | ZPE          | H            | G            |
|----|--------------|--------------|--------------|--------------|
| CP | -194.004693  | -193.910657  | -193.905597  | -193.937243  |
| 4  | -282.962581  | -282.906413  | -282.900828  | -282.934127  |
| 7  | -1023.214772 | -1023.164766 | -1023.158101 | -1023.195188 |
| 10 | -231.117199  | -231.026118  | -231.019383  | -231.054865  |
| 11 | -284.030611  | -283.969023  | -283.962175  | -283.998460  |
| 14 | -257.740933  | -257.616752  | -257.607883  | -257.648447  |
| 15 | -310.646135  | -310.551400  | -310.542459  | -310.583643  |
| 17 | -262.961226  | -262.910242  | -262.903804  | -262.939397  |
| 18 | -262.962634  | -262.911943  | -262.905288  | -262.940968  |
| 19 | -210.053079  | -209.972949  | -209.966410  | -210.001231  |
| 21 | -528.754735  | -528.686080  | -528.677703  | -528.718869  |
| 22 | -221.879282  | -221.729555  | -221.719636  | -221.763233  |
| 23 | -1062.515689 | -1062.437373 | -1062.429063 | -1062.470490 |
| 24 | -487.373433  | -487.313731  | -487.305741  | -487.346578  |
| 25 | -455.545928  | -455.461332  | -455.453129  | -455.493884  |
| 26 | -355.160575  | -355.110942  | -355.102782  | -355.142940  |
| 28 | -249.349228  | -249.240641  | -249.232506  | -249.271823  |
| 29 | -302.264534  | -302.185255  | -302.177210  | -302.216543  |
| 30 | -302.261800  | -302.182620  | -302.174614  | -302.213821  |
| 31 | -270.414898  | -270.295366  | -270.287206  | -270.326333  |
| 32 | -376.230838  | -376.170437  | -376.161993  | -376.202871  |
| 36 | -309.710792  | -309.562690  | -309.552965  | -309.595883  |
| 40 | -288.648438  | -288.511521  | -288.501892  | -288.544716  |
| 41 | -229.888051  | -229.818883  | -229.813640  | -229.845860  |
| 42 | -269.189604  | -269.092321  | -269.085286  | -269.122248  |
| 43 | -269.191197  | -269.093873  | -269.087015  | -269.123233  |
| 44 | -322.100628  | -322.032541  | -322.025643  | -322.062520  |
| 45 | -689.458779  | -689.398687  | -689.392412  | -689.428226  |
| 47 | -308.492546  | -308.367274  | -308.359361  | -308.398356  |
| 48 | -269.225422  | -269.125998  | -269.119899  | -269.154679  |
| 49 | -308.526470  | -308.399059  | -308.391117  | -308.430740  |
| 50 | -308.526837  | -308.399675  | -308.391814  | -308.431035  |
| 52 | -728.794295  | -728.704409  | -728.697109  | -728.735819  |
| 55 | -379.143394  | -379.086565  | -379.080472  | -379.115631  |
| 56 | -305.137444  | -305.061397  | -305.055815  | -305.089368  |
| 57 | -308.522697  | -308.393498  | -308.386492  | -308.423389  |



**Table S32.** M06-2X/6-31G\* energies (E), zero-point corrected energies (ZPE), enthalpies (H) and Gibbs free energies (G) computed for the transition structures of the reactions between the selected 35 dienophiles and CP (in au).

|          | E            | ZPE          | H            | G            |
|----------|--------------|--------------|--------------|--------------|
| TS-4+CP  | -476.959270  | -476.805856  | -476.796698  | -476.839088  |
| TS-7+CP  | -1217.211807 | -1217.064422 | -1217.054111 | -1217.099939 |
| TS-10+CP | -425.102716  | -424.914481  | -424.904270  | -424.948509  |
| TS-11+CP | -478.025201  | -477.866692  | -477.856199  | -477.901733  |
| TS-14+CP | -451.730810  | -451.508953  | -451.496706  | -451.545689  |
| TS-15+CP | -504.648387  | -504.456446  | -504.443855  | -504.494190  |
| TS-17+CP | -456.954796  | -456.807196  | -456.796923  | -456.841865  |
| TS-18+CP | -456.957371  | -456.809670  | -456.799408  | -456.844300  |
| TS-19+CP | -404.036180  | -403.859059  | -403.848958  | -403.893069  |
| TS-21+CP | -722.749610  | -722.584291  | -722.572161  | -722.622100  |
| TS-22+CP | -415.867869  | -415.620525  | -415.607480  | -415.657405  |
| TS-23+CP | -1256.506722 | -1256.331280 | -1256.319398 | -1256.368545 |
| TS-24+CP | -681.383887  | -681.226746  | -681.215191  | -681.263644  |
| TS-25+CP | -649.546839  | -649.365346  | -649.353444  | -649.402287  |
| TS-26+CP | -549.163304  | -549.017122  | -549.004990  | -549.054233  |
| TS-28+CP | -443.330038  | -443.124582  | -443.112934  | -443.160063  |
| TS-29+CP | -496.254889  | -496.078741  | -496.067015  | -496.114804  |
| TS-30+CP | -496.249461  | -496.073398  | -496.061641  | -496.109461  |
| TS-31+CP | -464.396314  | -464.179872  | -464.168299  | -464.215192  |
| TS-32+CP | -570.234231  | -570.077239  | -570.064853  | -570.114751  |
| TS-36+CP | -503.691039  | -503.445874  | -503.432810  | -503.482884  |
| TS-40+CP | -482.626208  | -482.392437  | -482.379537  | -482.428981  |
| TS-41+CP | -423.877135  | -423.711338  | -423.702453  | -423.744120  |
| TS-42+CP | -463.174482  | -462.980320  | -462.969724  | -463.015062  |
| TS-43+CP | -463.174028  | -462.979901  | -462.969524  | -463.014195  |
| TS-44+CP | -516.095693  | -515.931097  | -515.920421  | -515.966331  |
| TS-45+CP | -883.448451  | -883.292082  | -883.281988  | -883.326793  |
| TS-47+CP | -502.472014  | -502.249882  | -502.237672  | -502.286239  |
| TS-48+CP | -463.210253  | -463.013998  | -463.004339  | -463.047621  |
| TS-49+CP | -502.506736  | -502.282568  | -502.271155  | -502.318285  |
| TS-50+CP | -502.506149  | -502.281722  | -502.270535  | -502.316797  |
| TS-52+CP | -922.778552  | -922.591869  | -922.580957  | -922.627376  |
| TS-55+CP | -573.142729  | -572.988972  | -572.979105  | -573.023273  |
| TS-56+CP | -499.124659  | -498.951488  | -498.942252  | -498.984810  |
| TS-57+CP | -502.504814  | -502.278894  | -502.268146  | -502.313950  |

**Table S33.** M06-2X/6-31G\* activation energies ( $\Delta E^\ddagger$ ), zero-point corrected energies ( $\Delta ZPE^\ddagger$ ), enthalpies ( $\Delta H^\ddagger$ ) and Gibbs free energies ( $\Delta G^\ddagger$ ) computed for the reactions between the selected 35 dienophiles and **CP** (in kcal/mol).

|          | $\Delta E^\ddagger$ | $\Delta ZPE^\ddagger$ | $\Delta H^\ddagger$ | $\Delta G^\ddagger$ |
|----------|---------------------|-----------------------|---------------------|---------------------|
| TS-4+CP  | 5.0                 | 7.0                   | 6.1                 | 20.3                |
| TS-7+CP  | 4.8                 | 6.9                   | 6.0                 | 20.4                |
| TS-10+CP | 12.0                | 14.0                  | 13.0                | 27.4                |
| TS-11+CP | 6.3                 | 8.2                   | 7.3                 | 21.3                |
| TS-14+CP | 9.3                 | 11.6                  | 10.5                | 25.1                |
| TS-15+CP | 1.5                 | 3.5                   | 2.6                 | 16.8                |
| TS-17+CP | 7.0                 | 8.6                   | 7.8                 | 21.8                |
| TS-18+CP | 6.2                 | 8.1                   | 7.2                 | 21.3                |
| TS-19+CP | 13.5                | 15.4                  | 14.5                | 28.5                |
| TS-21+CP | 6.2                 | 7.8                   | 7.0                 | 21.3                |
| TS-22+CP | 10.1                | 12.4                  | 11.1                | 27.0                |
| TS-23+CP | 8.6                 | 10.5                  | 9.6                 | 24.6                |
| TS-24+CP | -3.6                | -1.5                  | -2.4                | 12.7                |
| TS-25+CP | 2.4                 | 4.2                   | 3.3                 | 18.1                |
| TS-26+CP | 1.2                 | 2.8                   | 2.1                 | 16.3                |
| TS-28+CP | 15.0                | 16.8                  | 15.8                | 30.7                |
| TS-29+CP | 9.0                 | 10.8                  | 9.9                 | 24.5                |
| TS-30+CP | 10.7                | 12.5                  | 11.7                | 26.1                |
| TS-31+CP | 14.6                | 16.4                  | 15.4                | 30.4                |
| TS-32+CP | 0.8                 | 2.4                   | 1.7                 | 15.9                |
| TS-36+CP | 15.3                | 17.2                  | 16.2                | 31.5                |
| TS-40+CP | 16.9                | 18.7                  | 17.5                | 33.2                |
| TS-41+CP | 9.8                 | 11.4                  | 10.5                | 24.5                |
| TS-42+CP | 12.4                | 14.2                  | 13.3                | 27.9                |
| TS-43+CP | 13.7                | 15.5                  | 14.5                | 29.0                |
| TS-44+CP | 6.0                 | 7.6                   | 6.8                 | 21.0                |
| TS-45+CP | 9.4                 | 10.8                  | 10.1                | 24.3                |
| TS-47+CP | 15.8                | 17.6                  | 17.1                | 31.0                |
| TS-48+CP | 12.5                | 14.2                  | 13.3                | 27.8                |
| TS-49+CP | 15.3                | 17.0                  | 16.0                | 31.2                |
| TS-50+CP | 15.9                | 18.0                  | 16.9                | 32.3                |
| TS-52+CP | 12.8                | 14.6                  | 13.6                | 28.7                |
| TS-55+CP | 3.4                 | 5.2                   | 4.4                 | 18.6                |
| TS-56+CP | 11.0                | 12.9                  | 12.0                | 26.2                |
| TS-57+CP | 14.2                | 15.9                  | 15.0                | 29.3                |

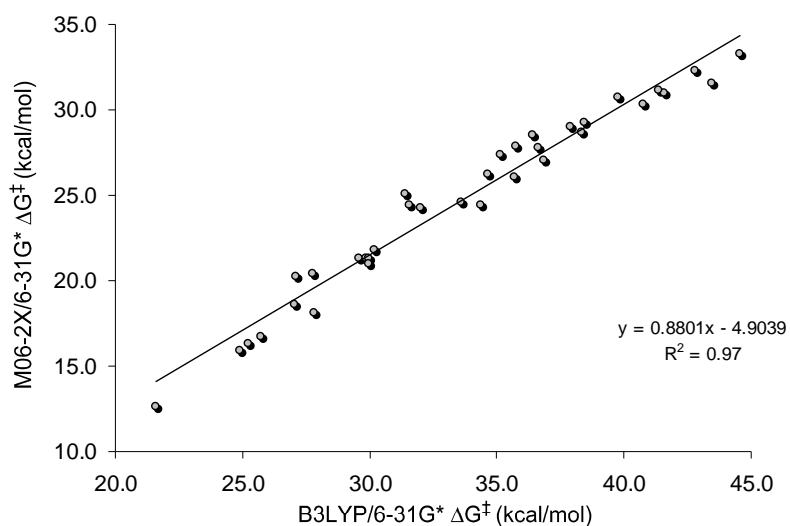

**Figure S7.** Plot of M06-2X/6-31G\*  $\Delta G^\ddagger$  versus B3LYP/6-31G\*  $\Delta G^\ddagger$  corresponding to the reactions between the 35 selected dienophiles and **CP**.

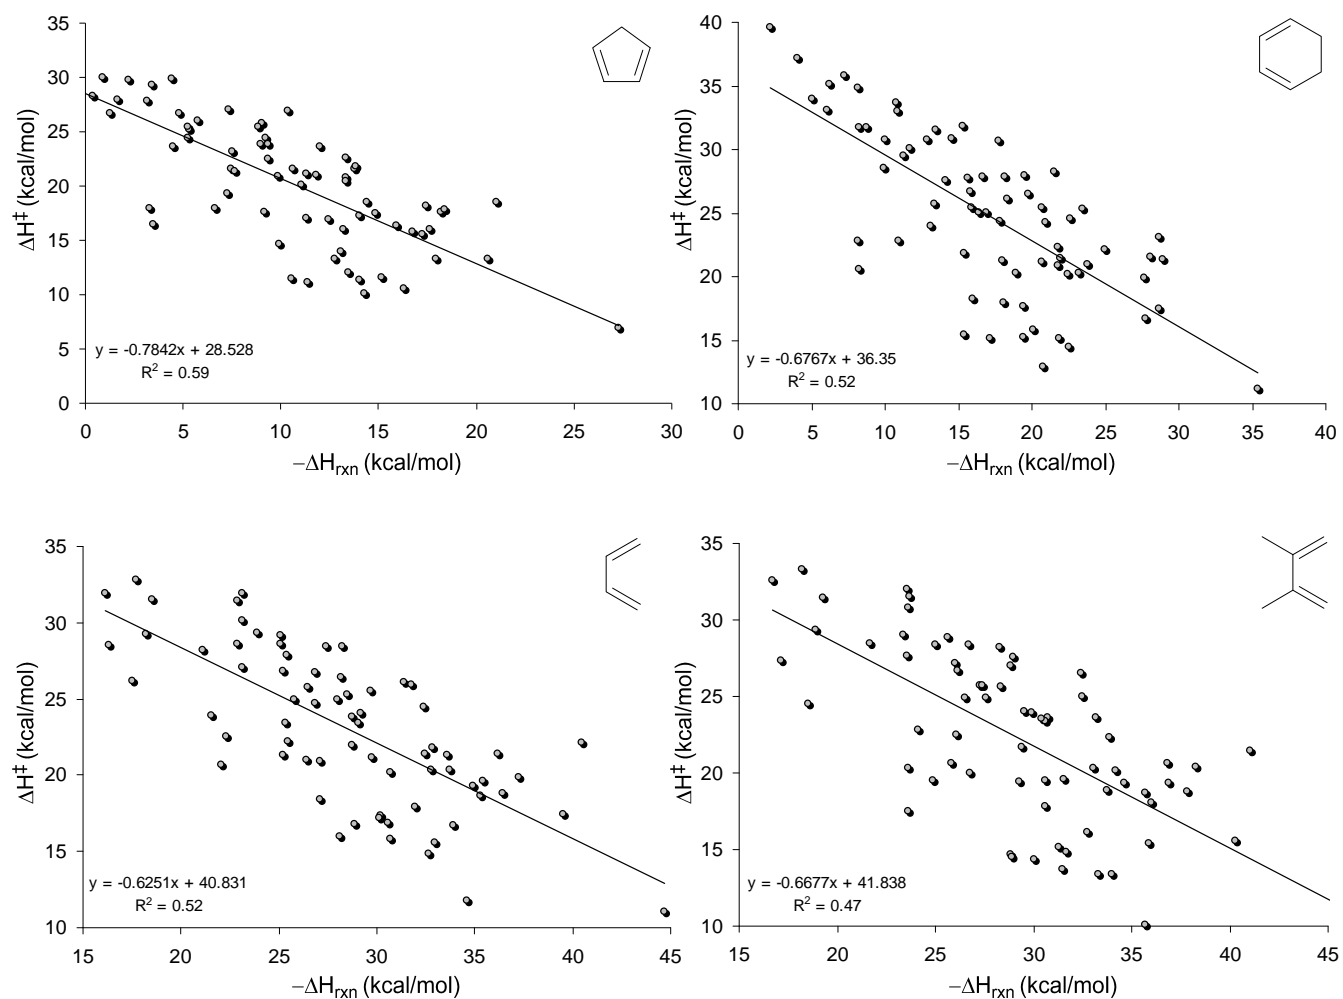

**Figure S8.** Plots of  $\Delta H^\ddagger$  versus  $-\Delta H_{rxn}$  corresponding to the reactions between **1-70** and the four dienes under study.

**Table S34.** B3LYP/6-31G\* activation energies ( $\Delta E^\ddagger$ ), diene distortion energy ( $\Delta E_{d-diene}^\ddagger$ ), dienophile distortion energy ( $\Delta E_{d-C=C}^\ddagger$ ), total distortion energy ( $\Delta E_d^\ddagger$ ) and interaction energy ( $\Delta E_i^\ddagger$ ) computed for the reactions of **1-70** and **CP** (in kcal/mol).

|          | $\Delta E^\ddagger$ | $\Delta E_{d-diene}^\ddagger$ | $\Delta E_{d-C=C}^\ddagger$ | $\Delta E_d^\ddagger$ | $\Delta E_i^\ddagger$ |
|----------|---------------------|-------------------------------|-----------------------------|-----------------------|-----------------------|
| TS-1+CP  | 16.4                | 15.3                          | 9.6                         | 24.8                  | -8.4                  |
| TS-2+CP  | 16.3                | 16.1                          | 9.2                         | 25.3                  | -9.0                  |
| TS-3+CP  | 10.3                | 14.3                          | 10.3                        | 24.6                  | -14.3                 |
| TS-4+CP  | 12.1                | 13.4                          | 9.9                         | 23.3                  | -11.2                 |
| TS-5+CP  | 17.5                | 15.6                          | 10.1                        | 25.7                  | -8.2                  |
| TS-6+CP  | 15.6                | 16.8                          | 7.7                         | 24.5                  | -9.0                  |
| TS-7+CP  | 12.6                | 14.9                          | 8.9                         | 23.8                  | -11.2                 |
| TS-8+CP  | 16.1                | 16.1                          | 11.9                        | 28.0                  | -11.9                 |
| TS-9+CP  | 19.8                | 17.6                          | 11.4                        | 29.0                  | -9.2                  |
| TS-10+CP | 20.0                | 17.4                          | 11.6                        | 29.0                  | -9.0                  |
| TS-11+CP | 14.9                | 17.6                          | 11.0                        | 28.6                  | -13.7                 |
| TS-12+CP | 8.8                 | 13.4                          | 12.1                        | 25.5                  | -16.8                 |
| TS-13+CP | 13.3                | 15.6                          | 12.0                        | 27.6                  | -14.3                 |
| TS-14+CP | 16.2                | 16.3                          | 14.7                        | 31.0                  | -14.8                 |
| TS-15+CP | 10.7                | 17.7                          | 12.5                        | 30.2                  | -19.6                 |
| TS-16+CP | 9.3                 | 12.1                          | 10.6                        | 22.7                  | -13.4                 |
| TS-17+CP | 15.3                | 16.4                          | 11.4                        | 27.7                  | -12.5                 |
| TS-18+CP | 14.6                | 16.3                          | 12.0                        | 28.3                  | -13.6                 |
| TS-19+CP | 21.5                | 16.5                          | 13.4                        | 30.0                  | -8.4                  |
| TS-20+CP | 20.5                | 16.1                          | 12.1                        | 28.3                  | -7.8                  |
| TS-21+CP | 14.5                | 16.2                          | 12.7                        | 28.9                  | -14.3                 |
| TS-22+CP | 20.3                | 18.6                          | 11.1                        | 29.7                  | -9.4                  |
| TS-23+CP | 18.0                | 16.7                          | 12.9                        | 29.6                  | -11.6                 |
| TS-24+CP | 5.6                 | 13.6                          | 11.0                        | 24.6                  | -19.0                 |
| TS-25+CP | 12.1                | 16.3                          | 10.2                        | 26.6                  | -14.5                 |
| TS-26+CP | 10.2                | 14.8                          | 13.8                        | 28.6                  | -18.4                 |
| TS-27+CP | 24.8                | 17.3                          | 15.5                        | 32.8                  | -8.0                  |
| TS-28+CP | 24.5                | 17.3                          | 15.0                        | 32.3                  | -7.8                  |
| TS-29+CP | 19.1                | 17.2                          | 14.3                        | 31.5                  | -12.4                 |
| TS-30+CP | 20.5                | 17.5                          | 15.0                        | 32.5                  | -12.0                 |
| TS-31+CP | 25.0                | 19.0                          | 15.2                        | 34.2                  | -9.2                  |
| TS-32+CP | 9.9                 | 16.2                          | 12.3                        | 28.5                  | -18.5                 |
| TS-33+CP | 10.5                | 18.6                          | 16.8                        | 35.4                  | -24.9                 |
| TS-34+CP | 16.8                | 17.0                          | 18.0                        | 35.0                  | -18.2                 |
| TS-35+CP | 16.8                | 19.6                          | 16.5                        | 36.1                  | -19.3                 |
| TS-36+CP | 27.1                | 20.0                          | 17.0                        | 37.1                  | -10.0                 |
| TS-37+CP | 15.1                | 22.1                          | 17.1                        | 39.2                  | -24.0                 |
| TS-38+CP | 24.2                | 18.7                          | 17.7                        | 36.4                  | -12.1                 |
| TS-39+CP | 24.5                | 18.7                          | 17.1                        | 35.8                  | -11.3                 |
| TS-40+CP | 28.5                | 18.8                          | 18.0                        | 36.8                  | -8.3                  |
| TS-41+CP | 17.0                | 15.4                          | 10.9                        | 26.4                  | -9.4                  |
| TS-42+CP | 20.9                | 16.8                          | 13.8                        | 30.6                  | -9.7                  |
| TS-43+CP | 22.7                | 16.8                          | 15.1                        | 31.9                  | -9.2                  |
| TS-44+CP | 15.1                | 16.1                          | 12.0                        | 28.1                  | -13.0                 |
| TS-45+CP | 17.3                | 15.4                          | 14.4                        | 29.8                  | -12.5                 |
| TS-46+CP | 20.2                | 17.5                          | 15.4                        | 32.9                  | -12.7                 |
| TS-47+CP | 26.2                | 17.9                          | 17.9                        | 35.8                  | -9.6                  |
| TS-48+CP | 21.4                | 17.8                          | 12.3                        | 30.1                  | -8.6                  |
| TS-49+CP | 25.7                | 19.0                          | 15.8                        | 34.8                  | -9.2                  |
| TS-50+CP | 26.8                | 19.5                          | 16.4                        | 36.0                  | -9.1                  |
| TS-51+CP | 20.2                | 18.8                          | 13.9                        | 32.7                  | -12.5                 |
| TS-52+CP | 22.8                | 18.1                          | 16.3                        | 34.4                  | -11.5                 |
| TS-53+CP | 25.7                | 20.5                          | 17.8                        | 38.3                  | -12.5                 |
| TS-54+CP | 30.2                | 20.6                          | 19.3                        | 39.9                  | -9.7                  |
| TS-55+CP | 12.2                | 16.9                          | 9.8                         | 26.6                  | -14.5                 |
| TS-56+CP | 19.7                | 16.8                          | 11.8                        | 28.6                  | -8.9                  |
| TS-57+CP | 23.2                | 19.0                          | 12.9                        | 31.9                  | -8.8                  |
| TS-58+CP | 28.9                | 21.0                          | 17.6                        | 38.6                  | -9.7                  |
| TS-59+CP | 28.7                | 20.7                          | 17.2                        | 37.9                  | -9.2                  |
| TS-60+CP | 22.2                | 19.8                          | 15.0                        | 34.8                  | -12.6                 |
| TS-61+CP | 25.9                | 19.6                          | 18.3                        | 38.0                  | -12.1                 |
| TS-62+CP | 29.0                | 21.7                          | 19.7                        | 41.3                  | -12.3                 |
| TS-63+CP | 33.2                | 22.5                          | 20.4                        | 42.9                  | -9.7                  |
| TS-64+CP | 17.4                | 16.5                          | 11.2                        | 27.7                  | -10.3                 |
| TS-65+CP | 22.7                | 18.5                          | 15.3                        | 33.7                  | -11.0                 |
| TS-66+CP | 23.3                | 19.1                          | 15.5                        | 34.6                  | -11.3                 |
| TS-67+CP | 16.0                | 17.7                          | 13.0                        | 30.8                  | -14.8                 |
| TS-68+CP | 19.4                | 16.8                          | 15.9                        | 32.7                  | -13.4                 |
| TS-69+CP | 22.6                | 19.8                          | 17.5                        | 37.2                  | -14.6                 |
| TS-70+CP | 27.4                | 20.5                          | 18.3                        | 38.8                  | -11.5                 |

**Table S35.** B3LYP/6-31G\* activation energies ( $\Delta E^\ddagger$ ), diene distortion energy ( $\Delta E_{d-diene}^\ddagger$ ), dienophile distortion energy ( $\Delta E_{d-C=C}^\ddagger$ ), total distortion energy ( $\Delta E_d^\ddagger$ ) and interaction energy ( $\Delta E_i^\ddagger$ ) computed for the reactions of **1-70** and **CH** (in kcal/mol).

|          | $\Delta E^\ddagger$ | $\Delta E_{d-diene}^\ddagger$ | $\Delta E_{d-C=C}^\ddagger$ | $\Delta E_d^\ddagger$ | $\Delta E_i^\ddagger$ |
|----------|---------------------|-------------------------------|-----------------------------|-----------------------|-----------------------|
| TS-1+CH  | 21.1                | 19.7                          | 9.6                         | 29.3                  | -8.2                  |
| TS-2+CH  | 20.5                | 20.1                          | 9.0                         | 29.2                  | -8.7                  |
| TS-3+CH  | 14.0                | 18.0                          | 10.8                        | 28.8                  | -14.8                 |
| TS-4+CH  | 16.4                | 17.6                          | 10.0                        | 27.6                  | -11.2                 |
| TS-5+CH  | 22.3                | 19.9                          | 10.6                        | 30.5                  | -8.2                  |
| TS-6+CH  | 19.1                | 20.4                          | 7.4                         | 27.8                  | -8.7                  |
| TS-7+CH  | 16.4                | 18.5                          | 8.9                         | 27.4                  | -11.0                 |
| TS-8+CH  | 20.1                | 19.8                          | 12.2                        | 32.0                  | -11.9                 |
| TS-9+CH  | 24.1                | 21.6                          | 11.4                        | 33.0                  | -8.9                  |
| TS-10+CH | 23.4                | 20.3                          | 14.1                        | 34.4                  | -11.0                 |
| TS-11+CH | 19.3                | 22.3                          | 11.1                        | 33.5                  | -14.2                 |
| TS-12+CH | 11.7                | 15.8                          | 13.1                        | 29.0                  | -17.3                 |
| TS-13+CH | 17.1                | 18.8                          | 12.8                        | 31.5                  | -14.4                 |
| TS-14+CH | 20.7                | 20.5                          | 16.6                        | 37.1                  | -16.4                 |
| TS-15+CH | 14.7                | 22.1                          | 12.8                        | 35.0                  | -20.3                 |
| TS-16+CH | 13.3                | 15.2                          | 12.2                        | 27.5                  | -14.2                 |
| TS-17+CH | 20.0                | 21.1                          | 11.3                        | 32.4                  | -12.4                 |
| TS-18+CH | 19.3                | 20.9                          | 12.3                        | 33.2                  | -13.9                 |
| TS-19+CH | 27.0                | 21.6                          | 13.8                        | 35.4                  | -8.4                  |
| TS-20+CH | 25.6                | 20.8                          | 12.5                        | 33.3                  | -7.7                  |
| TS-21+CH | 20.0                | 21.3                          | 13.0                        | 34.3                  | -14.3                 |
| TS-22+CH | 24.6                | 22.8                          | 11.9                        | 34.7                  | -10.1                 |
| TS-23+CH | 22.8                | 20.8                          | 13.9                        | 34.7                  | -11.9                 |
| TS-24+CH | 10.0                | 18.3                          | 11.0                        | 29.3                  | -19.3                 |
| TS-25+CH | 17.1                | 21.1                          | 10.4                        | 31.5                  | -14.4                 |
| TS-26+CH | 14.3                | 18.7                          | 14.8                        | 33.5                  | -19.2                 |
| TS-27+CH | 29.9                | 22.2                          | 16.0                        | 38.1                  | -8.2                  |
| TS-28+CH | 30.6                | 22.8                          | 16.4                        | 39.1                  | -8.5                  |
| TS-29+CH | 24.2                | 22.3                          | 15.0                        | 37.3                  | -13.2                 |
| TS-30+CH | 25.9                | 22.6                          | 15.2                        | 37.8                  | -11.9                 |
| TS-31+CH | 29.1                | 23.3                          | 15.8                        | 39.1                  | -10.0                 |
| TS-32+CH | 14.1                | 20.4                          | 13.4                        | 33.8                  | -19.6                 |
| TS-33+CH | 14.6                | 24.5                          | 17.6                        | 42.1                  | -27.5                 |
| TS-34+CH | 21.8                | 22.1                          | 19.7                        | 41.8                  | -20.0                 |
| TS-35+CH | 21.9                | 25.4                          | 17.2                        | 42.6                  | -20.7                 |
| TS-36+CH | 32.3                | 25.9                          | 18.1                        | 44.0                  | -11.7                 |
| TS-37+CH | 19.2                | 28.0                          | 17.3                        | 45.3                  | -26.1                 |
| TS-38+CH | 29.8                | 24.6                          | 18.6                        | 43.2                  | -13.4                 |
| TS-39+CH | 30.8                | 24.8                          | 18.5                        | 43.3                  | -12.5                 |
| TS-40+CH | 35.0                | 25.0                          | 19.4                        | 44.4                  | -9.5                  |
| TS-41+CH | 20.6                | 19.4                          | 10.2                        | 29.6                  | -9.0                  |
| TS-42+CH | 24.7                | 21.0                          | 13.5                        | 34.5                  | -9.8                  |
| TS-43+CH | 27.5                | 21.8                          | 15.7                        | 37.5                  | -10.0                 |
| TS-44+CH | 19.1                | 20.6                          | 11.8                        | 32.4                  | -13.3                 |
| TS-45+CH | 20.7                | 18.8                          | 14.8                        | 33.6                  | -12.8                 |
| TS-46+CH | 24.7                | 22.8                          | 15.6                        | 38.3                  | -13.7                 |
| TS-47+CH | 31.1                | 23.3                          | 18.8                        | 42.0                  | -10.9                 |
| TS-48+CH | 25.2                | 22.1                          | 11.4                        | 33.6                  | -8.4                  |
| TS-49+CH | 29.9                | 23.7                          | 15.4                        | 39.1                  | -9.2                  |
| TS-50+CH | 32.2                | 25.0                          | 16.3                        | 41.3                  | -9.1                  |
| TS-51+CH | 24.5                | 23.6                          | 13.7                        | 37.3                  | -12.8                 |
| TS-52+CH | 26.9                | 22.1                          | 16.6                        | 38.6                  | -11.7                 |
| TS-53+CH | 30.9                | 26.2                          | 18.1                        | 44.3                  | -13.4                 |
| TS-54+CH | 36.3                | 26.8                          | 20.1                        | 46.9                  | -10.7                 |
| TS-55+CH | 15.8                | 20.8                          | 8.9                         | 29.7                  | -13.9                 |
| TS-56+CH | 23.7                | 21.0                          | 11.0                        | 32.0                  | -8.3                  |
| TS-57+CH | 26.9                | 23.4                          | 12.2                        | 35.5                  | -8.7                  |
| TS-58+CH | 32.9                | 25.3                          | 17.3                        | 42.7                  | -9.7                  |
| TS-59+CH | 34.0                | 26.4                          | 17.2                        | 43.6                  | -9.6                  |
| TS-60+CH | 26.7                | 25.1                          | 15.2                        | 40.3                  | -13.6                 |
| TS-61+CH | 29.8                | 23.8                          | 18.7                        | 42.6                  | -12.8                 |
| TS-62+CH | 34.3                | 28.0                          | 20.2                        | 48.2                  | -13.9                 |
| TS-63+CH | 38.9                | 28.4                          | 21.7                        | 50.1                  | -11.2                 |
| TS-64+CH | 21.4                | 21.0                          | 10.6                        | 31.6                  | -10.2                 |
| TS-65+CH | 26.9                | 22.9                          | 15.1                        | 38.0                  | -11.1                 |
| TS-66+CH | 28.6                | 24.7                          | 15.3                        | 40.0                  | -11.4                 |
| TS-67+CH | 20.3                | 22.6                          | 13.2                        | 35.7                  | -15.5                 |
| TS-68+CH | 23.4                | 20.9                          | 16.8                        | 37.7                  | -14.2                 |
| TS-69+CH | 27.8                | 25.8                          | 18.0                        | 43.8                  | -16.0                 |
| TS-70+CH | 33.2                | 27.0                          | 19.6                        | 46.6                  | -13.4                 |

**Table S36.** B3LYP/6-31G\* activation energies ( $\Delta E^\ddagger$ ), diene distortion energy ( $\Delta E_{d-diene}^\ddagger$ ), dienophile distortion energy ( $\Delta E_{d-C=C}^\ddagger$ ), total distortion energy ( $\Delta E_d^\ddagger$ ) and interaction energy ( $\Delta E_i^\ddagger$ ) computed for the reactions of **1-70** and **BU** (in kcal/mol).

|          | $\Delta E^\ddagger$ | $\Delta E_{d-diene}^\ddagger$ | $\Delta E_{d-C=C}^\ddagger$ | $\Delta E_d^\ddagger$ | $\Delta E_i^\ddagger$ |
|----------|---------------------|-------------------------------|-----------------------------|-----------------------|-----------------------|
| TS-1+BU  | 20.4                | 18.8                          | 9.8                         | 28.7                  | -8.2                  |
| TS-2+BU  | 19.4                | 18.5                          | 9.3                         | 27.8                  | -8.4                  |
| TS-3+BU  | 13.7                | 16.4                          | 10.1                        | 26.5                  | -12.9                 |
| TS-4+BU  | 16.3                | 17.3                          | 9.8                         | 27.1                  | -10.8                 |
| TS-5+BU  | 21.3                | 18.7                          | 11.0                        | 29.7                  | -8.4                  |
| TS-6+BU  | 16.2                | 17.7                          | 6.8                         | 24.5                  | -8.3                  |
| TS-7+BU  | 14.8                | 16.5                          | 8.0                         | 24.5                  | -9.8                  |
| TS-8+BU  | 17.5                | 17.1                          | 10.8                        | 27.9                  | -10.4                 |
| TS-9+BU  | 21.1                | 18.4                          | 10.7                        | 29.1                  | -8.0                  |
| TS-10+BU | 23.2                | 20.1                          | 11.4                        | 31.5                  | -8.3                  |
| TS-11+BU | 19.3                | 20.5                          | 10.7                        | 31.3                  | -12.0                 |
| TS-12+BU | 10.4                | 14.4                          | 10.1                        | 24.5                  | -14.1                 |
| TS-13+BU | 14.9                | 16.1                          | 10.9                        | 27.0                  | -12.1                 |
| TS-14+BU | 19.9                | 18.3                          | 14.8                        | 33.1                  | -13.2                 |
| TS-15+BU | 15.6                | 20.1                          | 12.3                        | 32.4                  | -16.7                 |
| TS-16+BU | 14.4                | 15.4                          | 11.0                        | 26.5                  | -12.0                 |
| TS-17+BU | 20.4                | 20.1                          | 11.6                        | 31.7                  | -11.4                 |
| TS-18+BU | 19.4                | 19.9                          | 11.5                        | 31.4                  | -12.1                 |
| TS-19+BU | 25.0                | 20.3                          | 12.8                        | 33.1                  | -8.1                  |
| TS-20+BU | 23.6                | 18.9                          | 12.0                        | 30.9                  | -7.3                  |
| TS-21+BU | 18.4                | 18.8                          | 12.0                        | 30.7                  | -12.3                 |
| TS-22+BU | 21.0                | 19.5                          | 10.3                        | 29.9                  | -8.9                  |
| TS-23+BU | 20.3                | 18.4                          | 11.9                        | 30.3                  | -10.1                 |
| TS-24+BU | 9.8                 | 16.2                          | 9.6                         | 25.8                  | -16.0                 |
| TS-25+BU | 17.0                | 19.6                          | 10.3                        | 30.0                  | -13.0                 |
| TS-26+BU | 16.2                | 18.3                          | 13.5                        | 31.8                  | -15.7                 |
| TS-27+BU | 27.6                | 21.2                          | 14.9                        | 36.1                  | -8.5                  |
| TS-28+BU | 27.6                | 20.3                          | 14.6                        | 35.0                  | -7.4                  |
| TS-29+BU | 24.3                | 20.8                          | 14.6                        | 35.3                  | -11.1                 |
| TS-30+BU | 24.7                | 20.9                          | 14.3                        | 35.2                  | -10.5                 |
| TS-31+BU | 27.8                | 20.9                          | 15.5                        | 36.4                  | -8.5                  |
| TS-32+BU | 15.8                | 19.5                          | 12.2                        | 31.7                  | -15.9                 |
| TS-33+BU | 17.5                | 22.1                          | 16.0                        | 38.1                  | -20.6                 |
| TS-34+BU | 22.5                | 20.3                          | 17.3                        | 37.7                  | -15.2                 |
| TS-35+BU | 21.6                | 22.4                          | 15.2                        | 37.6                  | -16.0                 |
| TS-36+BU | 27.6                | 21.2                          | 15.9                        | 37.2                  | -9.6                  |
| TS-37+BU | 19.4                | 24.1                          | 15.6                        | 39.6                  | -20.2                 |
| TS-38+BU | 28.5                | 21.9                          | 17.2                        | 39.1                  | -10.6                 |
| TS-39+BU | 28.3                | 21.7                          | 16.4                        | 38.1                  | -9.8                  |
| TS-40+BU | 31.2                | 22.2                          | 17.7                        | 39.9                  | -8.8                  |
| TS-41+BU | 19.1                | 17.6                          | 10.5                        | 28.1                  | -9.1                  |
| TS-42+BU | 21.2                | 18.8                          | 12.4                        | 31.3                  | -10.1                 |
| TS-43+BU | 25.4                | 19.1                          | 14.8                        | 33.9                  | -8.5                  |
| TS-44+BU | 18.9                | 18.8                          | 11.7                        | 30.5                  | -11.6                 |
| TS-45+BU | 18.0                | 16.4                          | 12.6                        | 29.1                  | -11.1                 |
| TS-46+BU | 22.7                | 20.0                          | 14.5                        | 34.5                  | -11.7                 |
| TS-47+BU | 27.3                | 19.4                          | 17.2                        | 36.6                  | -9.3                  |
| TS-48+BU | 24.0                | 21.3                          | 11.7                        | 33.0                  | -9.0                  |
| TS-49+BU | 26.1                | 21.5                          | 13.9                        | 35.3                  | -9.2                  |
| TS-50+BU | 29.4                | 22.8                          | 15.6                        | 38.4                  | -9.1                  |
| TS-51+BU | 24.0                | 21.6                          | 13.5                        | 35.0                  | -11.0                 |
| TS-52+BU | 23.8                | 19.8                          | 14.5                        | 34.2                  | -10.5                 |
| TS-53+BU | 28.4                | 23.8                          | 16.3                        | 40.1                  | -11.7                 |
| TS-54+BU | 31.2                | 22.1                          | 17.8                        | 39.9                  | -8.7                  |
| TS-55+BU | 15.8                | 19.4                          | 9.2                         | 28.6                  | -12.9                 |
| TS-56+BU | 22.9                | 19.8                          | 11.3                        | 31.0                  | -8.2                  |
| TS-57+BU | 25.5                | 22.2                          | 12.5                        | 34.7                  | -9.3                  |
| TS-58+BU | 27.7                | 21.5                          | 15.1                        | 36.6                  | -8.9                  |
| TS-59+BU | 30.5                | 23.7                          | 16.2                        | 40.0                  | -9.4                  |
| TS-60+BU | 25.9                | 23.8                          | 14.5                        | 38.3                  | -12.4                 |
| TS-61+BU | 24.8                | 20.5                          | 15.9                        | 36.3                  | -11.5                 |
| TS-62+BU | 30.7                | 25.3                          | 17.5                        | 42.9                  | -12.2                 |
| TS-63+BU | 32.0                | 23.1                          | 18.4                        | 41.5                  | -9.5                  |
| TS-64+BU | 20.5                | 19.3                          | 10.8                        | 30.1                  | -9.6                  |
| TS-65+BU | 23.2                | 19.4                          | 13.2                        | 32.6                  | -9.4                  |
| TS-66+BU | 25.9                | 21.3                          | 14.4                        | 35.7                  | -9.8                  |
| TS-67+BU | 20.3                | 20.7                          | 12.4                        | 33.2                  | -12.9                 |
| TS-68+BU | 19.9                | 19.0                          | 13.4                        | 32.5                  | -12.6                 |
| TS-69+BU | 25.3                | 22.6                          | 15.5                        | 38.1                  | -12.7                 |
| TS-70+BU | 27.6                | 22.6                          | 16.4                        | 39.0                  | -11.4                 |

**Table S37.** B3LYP/6-31G\* activation energies ( $\Delta E^\ddagger$ ), diene distortion energy ( $\Delta E_{d-diene}^\ddagger$ ), dienophile distortion energy ( $\Delta E_{d-C=C}^\ddagger$ ), total distortion energy ( $\Delta E_d^\ddagger$ ) and interaction energy ( $\Delta E_i^\ddagger$ ) computed for the reactions of **1-70** and **DMB** (in kcal/mol).

|           | $\Delta E^\ddagger$ | $\Delta E_{d-diene}^\ddagger$ | $\Delta E_{d-C=C}^\ddagger$ | $\Delta E_d^\ddagger$ | $\Delta E_i^\ddagger$ |
|-----------|---------------------|-------------------------------|-----------------------------|-----------------------|-----------------------|
| TS-1+DMB  | 19.9                | 18.9                          | 10.0                        | 28.9                  | -9.0                  |
| TS-2+DMB  | 19.5                | 18.5                          | 9.6                         | 28.1                  | -8.6                  |
| TS-3+DMB  | 12.6                | 15.9                          | 10.4                        | 26.3                  | -13.7                 |
| TS-4+DMB  | 14.8                | 16.7                          | 10.7                        | 27.4                  | -12.5                 |
| TS-5+DMB  | 20.9                | 19.0                          | 11.0                        | 30.0                  | -9.1                  |
| TS-6+DMB  | 16.8                | 18.1                          | 7.3                         | 25.4                  | -8.6                  |
| TS-7+DMB  | 14.4                | 16.5                          | 8.5                         | 24.9                  | -10.5                 |
| TS-8+DMB  | 17.2                | 16.9                          | 11.0                        | 27.8                  | -10.6                 |
| TS-9+DMB  | 21.2                | 18.2                          | 11.0                        | 29.1                  | -8.0                  |
| TS-10+DMB | 23.4                | 20.0                          | 11.7                        | 31.7                  | -8.3                  |
| TS-11+DMB | 18.9                | 20.7                          | 10.9                        | 31.6                  | -12.7                 |
| TS-12+DMB | 9.1                 | 13.8                          | 9.9                         | 23.7                  | -14.6                 |
| TS-13+DMB | 13.9                | 15.6                          | 11.0                        | 26.5                  | -12.7                 |
| TS-14+DMB | 18.8                | 17.8                          | 15.3                        | 33.1                  | -14.3                 |
| TS-15+DMB | 14.0                | 19.8                          | 12.8                        | 32.6                  | -18.6                 |
| TS-16+DMB | 12.5                | 15.0                          | 10.6                        | 25.6                  | -13.1                 |
| TS-17+DMB | 18.8                | 20.5                          | 11.6                        | 32.1                  | -13.3                 |
| TS-18+DMB | 18.2                | 20.2                          | 11.4                        | 31.6                  | -13.4                 |
| TS-19+DMB | 24.6                | 20.4                          | 12.9                        | 33.3                  | -8.7                  |
| TS-20+DMB | 23.2                | 18.9                          | 11.8                        | 30.7                  | -7.6                  |
| TS-21+DMB | 18.2                | 18.9                          | 12.2                        | 31.1                  | -12.9                 |
| TS-22+DMB | 21.8                | 19.9                          | 10.8                        | 30.7                  | -8.9                  |
| TS-23+DMB | 20.0                | 18.3                          | 12.4                        | 30.7                  | -10.7                 |
| TS-24+DMB | 8.0                 | 16.4                          | 9.7                         | 26.1                  | -18.2                 |
| TS-25+DMB | 15.5                | 19.8                          | 11.0                        | 30.8                  | -15.3                 |
| TS-26+DMB | 13.1                | 18.1                          | 13.2                        | 31.3                  | -18.2                 |
| TS-27+DMB | 27.7                | 20.3                          | 14.9                        | 35.2                  | -7.5                  |
| TS-28+DMB | 27.0                | 20.3                          | 14.6                        | 34.9                  | -7.9                  |
| TS-29+DMB | 23.5                | 21.2                          | 14.4                        | 35.5                  | -12.0                 |
| TS-30+DMB | 23.1                | 21.2                          | 14.1                        | 35.3                  | -12.2                 |
| TS-31+DMB | 28.3                | 21.3                          | 15.5                        | 36.8                  | -8.5                  |
| TS-32+DMB | 13.7                | 19.2                          | 12.4                        | 31.6                  | -17.9                 |
| TS-33+DMB | 14.0                | 22.7                          | 15.8                        | 38.5                  | -24.5                 |
| TS-34+DMB | 19.4                | 20.2                          | 17.4                        | 37.5                  | -18.2                 |
| TS-35+DMB | 19.7                | 22.6                          | 15.4                        | 38.0                  | -18.3                 |
| TS-36+DMB | 28.1                | 21.4                          | 16.0                        | 37.4                  | -9.4                  |
| TS-37+DMB | 16.6                | 24.9                          | 15.7                        | 40.6                  | -24.0                 |
| TS-38+DMB | 27.9                | 22.1                          | 16.9                        | 39.1                  | -11.1                 |
| TS-39+DMB | 26.7                | 22.3                          | 16.1                        | 38.4                  | -11.7                 |
| TS-40+DMB | 31.2                | 21.5                          | 17.5                        | 39.0                  | -7.8                  |
| TS-41+DMB | 20.0                | 18.0                          | 10.8                        | 28.8                  | -8.8                  |
| TS-42+DMB | 22.0                | 18.2                          | 12.7                        | 30.9                  | -8.9                  |
| TS-43+DMB | 26.2                | 19.6                          | 14.8                        | 34.4                  | -8.2                  |
| TS-44+DMB | 18.9                | 19.3                          | 11.4                        | 30.7                  | -11.8                 |
| TS-45+DMB | 18.3                | 16.4                          | 12.8                        | 29.2                  | -10.9                 |
| TS-46+DMB | 23.0                | 20.5                          | 14.2                        | 34.7                  | -11.7                 |
| TS-47+DMB | 28.1                | 19.6                          | 17.4                        | 37.0                  | -9.0                  |
| TS-48+DMB | 25.1                | 20.8                          | 12.1                        | 32.9                  | -7.8                  |
| TS-49+DMB | 27.1                | 21.1                          | 14.2                        | 35.3                  | -8.1                  |
| TS-50+DMB | 30.3                | 22.4                          | 15.8                        | 38.2                  | -7.9                  |
| TS-51+DMB | 24.5                | 22.0                          | 13.4                        | 35.5                  | -10.9                 |
| TS-52+DMB | 24.2                | 20.0                          | 14.9                        | 34.9                  | -10.7                 |
| TS-53+DMB | 28.8                | 23.5                          | 16.1                        | 39.6                  | -10.8                 |
| TS-54+DMB | 32.2                | 22.7                          | 18.0                        | 40.7                  | -8.5                  |
| TS-55+DMB | 14.8                | 20.1                          | 9.3                         | 29.4                  | -14.6                 |
| TS-56+DMB | 22.8                | 20.1                          | 11.6                        | 31.6                  | -8.8                  |
| TS-57+DMB | 26.5                | 21.8                          | 12.7                        | 34.4                  | -8.0                  |
| TS-58+DMB | 28.6                | 21.8                          | 15.4                        | 37.2                  | -8.6                  |
| TS-59+DMB | 31.6                | 23.4                          | 16.4                        | 39.8                  | -8.2                  |
| TS-60+DMB | 26.0                | 23.3                          | 14.5                        | 37.8                  | -11.8                 |
| TS-61+DMB | 25.1                | 20.6                          | 16.1                        | 36.7                  | -11.6                 |
| TS-62+DMB | 31.0                | 25.1                          | 17.3                        | 42.5                  | -11.5                 |
| TS-63+DMB | 32.7                | 23.6                          | 18.5                        | 42.1                  | -9.4                  |
| TS-64+DMB | 19.7                | 19.3                          | 11.0                        | 30.3                  | -10.6                 |
| TS-65+DMB | 22.2                | 19.5                          | 13.4                        | 32.9                  | -10.7                 |
| TS-66+DMB | 25.1                | 21.4                          | 14.6                        | 36.1                  | -11.0                 |
| TS-67+DMB | 18.9                | 20.9                          | 12.5                        | 33.3                  | -14.5                 |
| TS-68+DMB | 18.7                | 17.9                          | 13.4                        | 31.3                  | -12.6                 |
| TS-69+DMB | 24.0                | 22.8                          | 15.3                        | 38.1                  | -14.1                 |
| TS-70+DMB | 26.7                | 21.8                          | 16.5                        | 38.2                  | -11.6                 |



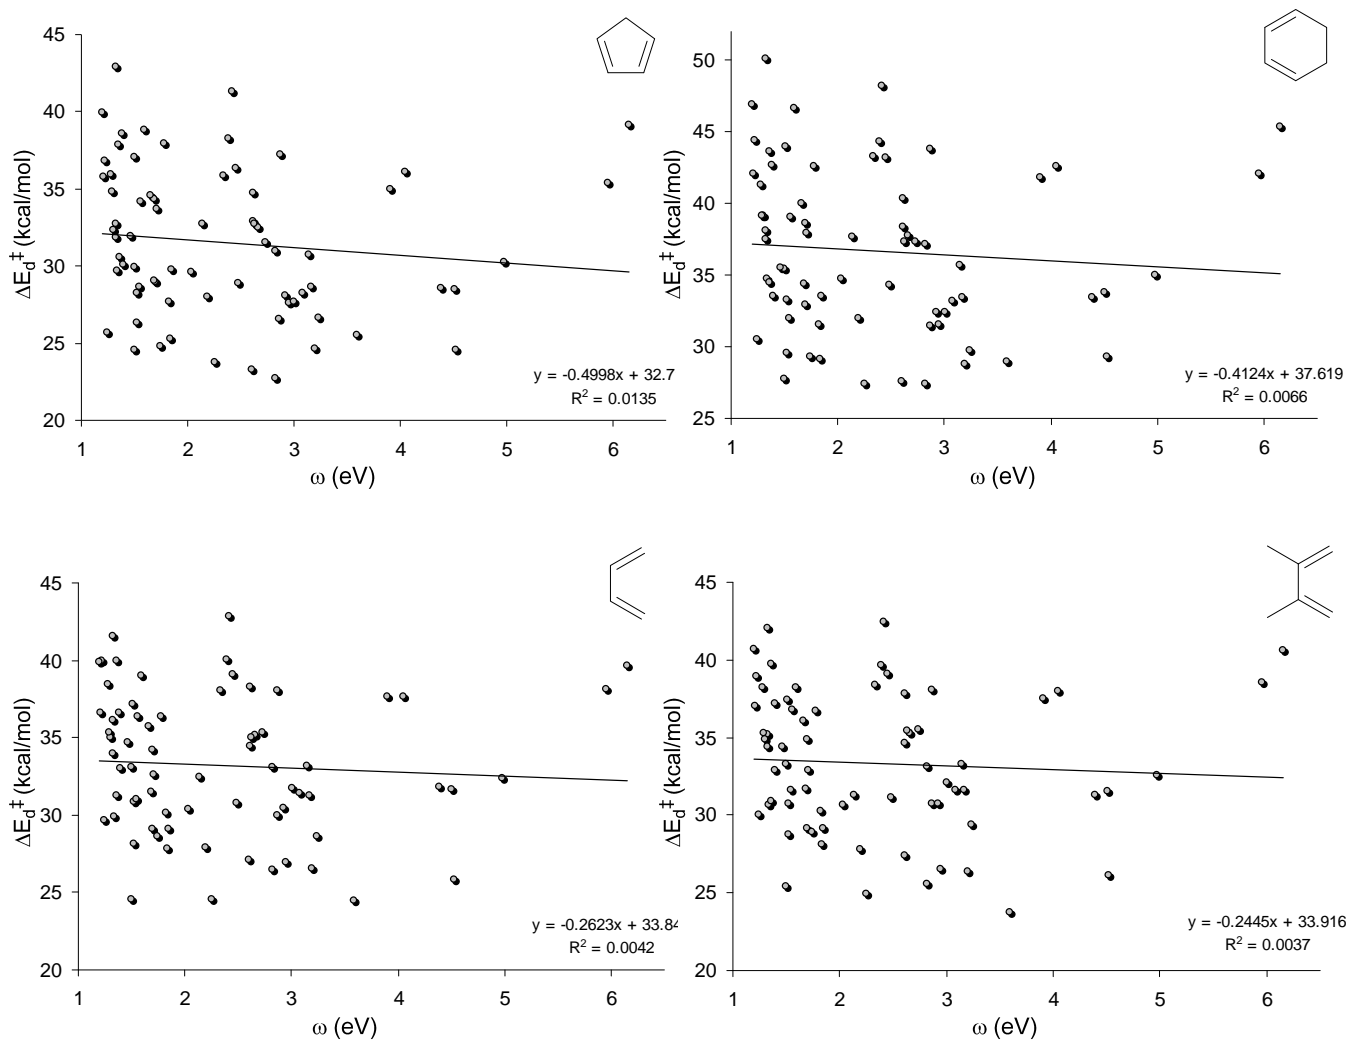

**Figure S9.** Plots of  $\Delta E_d^\ddagger$  versus  $\omega$  corresponding to the reactions between **1-70** and the four dienes under study.

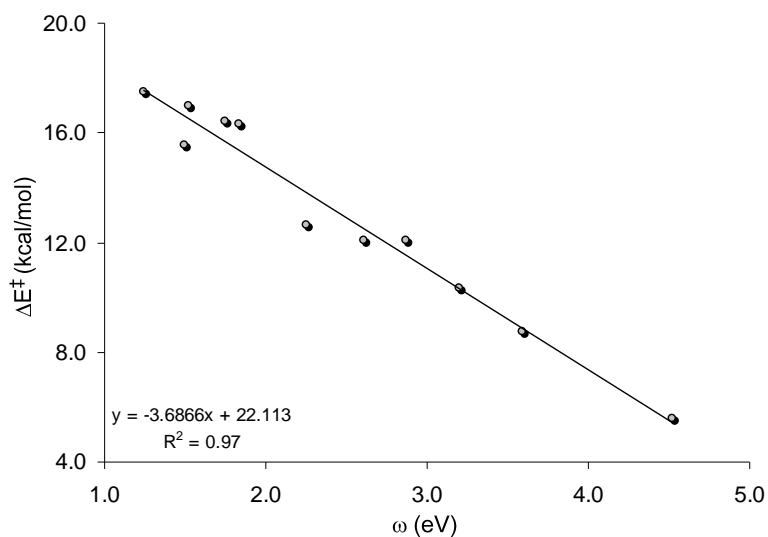

**Figure S10.** Plots of  $\Delta E^\ddagger$  versus  $\omega$  corresponding to the reactions between the similarly distorted TSs corresponding to the reactions of compounds **1-7**, **12**, **24-25** and **41** with **CP**.

*Note that when the distortion energy is the same, a good linear correlation between the activation barrier and the electrophilicity is found.*

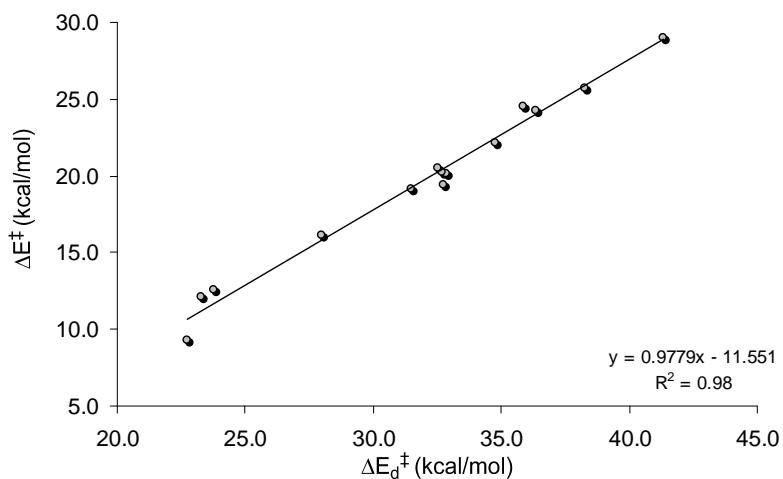

**Figure S11.** Plots of  $\Delta E^\ddagger$  versus  $\Delta E_d^\ddagger$  corresponding to the reactions between the similar electrophilic reagents **4**, **7-8**, **16**, **29-30**, **38-39**, **46**, **51**, **53**, **60**, **62** and **68** ( $2.1 \text{ eV} < \omega < 2.8 \text{ eV}$ ) with **CP**.

*Note that when the dienophiles display similar  $\omega$  indices, a good linear correlation between the activation barrier and the distortion energy is found.*

**Table S38.** B3LYP/6-31G\* activation energies ( $\Delta E^\ddagger$ ), zero-point corrected energies ( $\Delta ZPE^\ddagger$ ), enthalpies ( $\Delta H^\ddagger$ ) and Gibbs free energies ( $\Delta G^\ddagger$ ) computed for the reactions between ethylene (**ET**) and **CP**, **CH**, **BU** and **DMB** (in kcal/mol).

|                  | $\Delta E^\ddagger$ | $\Delta ZPE^\ddagger$ | $\Delta H^\ddagger$ | $\Delta G^\ddagger$ |
|------------------|---------------------|-----------------------|---------------------|---------------------|
| <b>TS-ET+CP</b>  | 19.9                | 22.3                  | 21.1                | 34.4                |
| <b>TS-ET+CH</b>  | 24.3                | 26.5                  | 25.3                | 38.6                |
| <b>TS-ET+BU</b>  | 22.4                | 24.8                  | 23.4                | 36.8                |
| <b>TS-ET+DMB</b> | 23.4                | 25.1                  | 24.1                | 36.9                |

**Table S39.** B3LYP/6-31G\* activation energies ( $\Delta E^\ddagger$ ), diene distortion energy ( $\Delta E_{d-diene}^\ddagger$ ), dienophile distortion energy ( $\Delta E_{d-c=c}^\ddagger$ ), total distortion energy ( $\Delta E_d^\ddagger$ ) and interaction energy ( $\Delta E_i^\ddagger$ ) computed for the reactions between ethylene (**ET**) and **CP**, **CH**, **BU** and **DMB** (in kcal/mol).

|                  | $\Delta E^\ddagger$ | $\Delta E_{d-diene}^\ddagger$ | $\Delta E_{d-c=c}^\ddagger$ | $\Delta E_d^\ddagger$ | $\Delta E_i^\ddagger$ |
|------------------|---------------------|-------------------------------|-----------------------------|-----------------------|-----------------------|
| <b>TS-ET+CP</b>  | 19.9                | 16.4                          | 7.5                         | 23.9                  | -4.0                  |
| <b>TS-ET+CH</b>  | 24.3                | 20.8                          | 7.5                         | 28.3                  | -4.0                  |
| <b>TS-ET+BU</b>  | 22.4                | 19.6                          | 7.9                         | 27.5                  | -5.1                  |
| <b>TS-ET+DMB</b> | 23.4                | 19.8                          | 8.1                         | 27.9                  | -4.5                  |

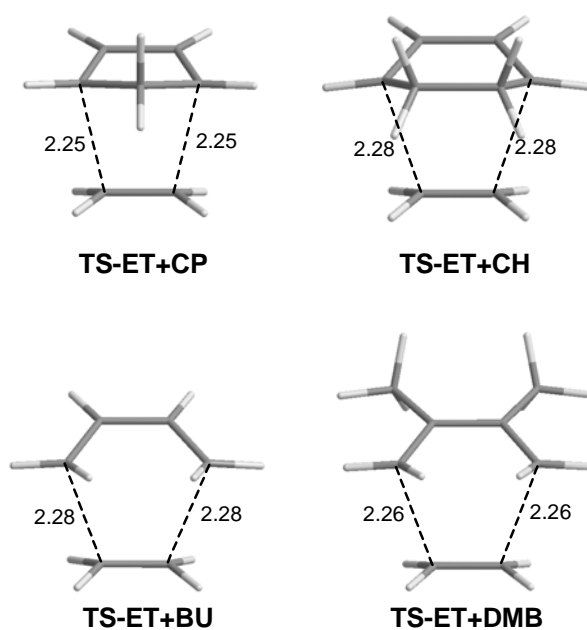

**Figure S12.** Optimized geometries for the transition structures found for the DA reactions between **ET** and **CP**, **CH**, **BU** and **DMB**.

**Table S40.** Results obtained by applying ANOVA of the selected most significant factors of the interaction energy ( $\Delta E_1^\ddagger$ )

$$-\Delta E_1^\ddagger = a.\omega + b.NS + c$$

| Source                            | Sum of Squares | Mean Square | F value    | Prob. > F | Significant |
|-----------------------------------|----------------|-------------|------------|-----------|-------------|
| <b>cyclopentadiene</b>            |                |             |            |           |             |
| $\omega$                          | 843.387368     | 843.387368  | 1106.07811 | < 0.0001  | Yes         |
| NS                                | 14.6690391     | 14.6690391  | 19.23802   | < 0.0001  | Yes         |
| <b>1,3-cyclohexadiene</b>         |                |             |            |           |             |
| $\omega$                          | 953.43047      | 953.43047   | 890.001771 | < 0.0001  | Yes         |
| NS                                | 58.9957605     | 58.9957605  | 55.07096   | < 0.0001  | Yes         |
| <b>butadiene</b>                  |                |             |            |           |             |
| $\omega$                          | 460.583715     | 460.583715  | 743.540003 | < 0.0001  | Yes         |
| NS                                | 12.1924567     | 12.1924567  | 19.6828047 | < 0.0001  | Yes         |
| <b>2,3-dimethyl-1,3-butadiene</b> |                |             |            |           |             |
| $\omega$                          | 852.120631     | 852.120631  | 1015.82913 | < 0.0001  | Yes         |
| NS                                | 6.72604758     | 6.72604758  | 8.01824861 | 0.0061    | Yes         |

**Table S41.** Results obtained by applying ANOVA of the selected most significant factors of the diene distortion energy ( $\Delta E_{d^{\ddagger}-C=C}$ ) and coefficient values of Equation 4.

$$\Delta E_{d^{\ddagger}-C=C} = a.\Delta d_{C1C2} + b.\Delta\phi + c.\tau + d.\chi_{C1} + e.\chi_{C2} + f.\Delta\phi^2 + g.\chi_{C2}^2 + h.\Delta\phi.\chi_{C1} + i.\Delta\phi.\chi_{C2} + j.\tau.\chi_{C2} + k$$

| Source                 | Coefficient Value | Sum of Squares | Mean Square | F value  | Prob. > F | Significant |
|------------------------|-------------------|----------------|-------------|----------|-----------|-------------|
| $\Delta d_{C1C2}$      | $a = 109.4497$    | 40.96231       | 40.96231    | 47.81965 | < 0.0001  | Yes         |
| $\Delta\phi$           | $b = 5.270745$    | 17.08504       | 17.08504    | 19.94518 | < 0.0001  | Yes         |
| $\tau$                 | $c = 0.23307$     | 32.15027       | 32.15027    | 37.53243 | < 0.0001  | Yes         |
| $\chi_{C1}$            | $d = -0.50563$    | 8.971235       | 8.971235    | 10.47307 | 0.0014    | Yes         |
| $\chi_{C2}$            | $e = -0.44627$    | 38.47113       | 38.47113    | 44.91144 | < 0.0001  | Yes         |
| $\Delta\phi^2$         | $f = -3.11435$    | 43.29541       | 43.29541    | 50.54332 | < 0.0001  | Yes         |
| $\chi_{C2}^2$          | $g = 0.008037$    | 32.4202        | 32.4202     | 37.84754 | < 0.0001  | Yes         |
| $\Delta\phi.\chi_{C1}$ | $h = -0.43904$    | 65.42868       | 65.42868    | 76.38184 | < 0.0001  | Yes         |
| $\Delta\phi.\chi_{C2}$ | $i = -0.17773$    | 27.64464       | 27.64464    | 32.27253 | < 0.0001  | Yes         |
| $\tau.\chi_{C2}$       | $j = -0.00822$    | 19.9772        | 19.9772     | 23.32151 | < 0.0001  | Yes         |
| -                      | $k = 11.71181$    | -              | -           | -        | -         | -           |

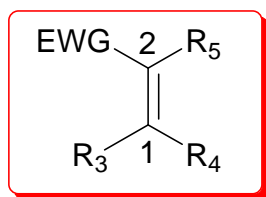

**Bending angles:**

$$\begin{aligned} \phi_1 &= \angle R_3-C_1-R_4 \\ \phi_2 &= \angle R_3-C_1-C_2 \\ \phi_3 &= \angle R_4-C_1-C_2 \\ \phi_4 &= \angle R_5-C_2-EWG \\ \phi_5 &= \angle R_5-C_2-C_1 \\ \phi_6 &= \angle C_1-C_2-EWG \end{aligned}$$

**Dihedral angles:**

$$\begin{aligned} \theta_1 &= \angle R_3-C_1-C_2-EWG \\ \theta_2 &= \angle R_4-C_1-C_2-R_5 \\ \theta_3 &= \angle R_4-C_1-C_2-EWG \\ \theta_4 &= \angle R_3-C_1-C_2-R_5 \end{aligned}$$

**Out-of-plane deformations:**

$$\begin{aligned} \tau &= (\theta_1 + \theta_2)/2 \\ \chi_{C1} &= \theta_1 - \theta_3 + \pi(\text{mod } 2\pi) \\ &= -\theta_2 + \theta_4 + \pi(\text{mod } 2\pi) \\ \chi_{C2} &= \theta_2 - \theta_3 + \pi(\text{mod } 2\pi) \\ &= -\theta_1 + \theta_4 + \pi(\text{mod } 2\pi) \end{aligned}$$

**Figure S13.** Definition of the bending angles, dihedral angles and out-of-plane deformations for the strained dienophiles.

**Table S42.**  $\Delta d_{C1C2}$ ,  $\Delta\phi$ ,  $\theta_{1-4}$ ,  $\tau$ ,  $\chi_{C1}$  and  $\chi_{C2}$  values for the dienophile fragments derived from the transition structures of CP.

| fragment from | $\Delta d_{C1C2}$ | $\Delta\phi$ | $\theta_1$ | $\theta_2$ | $\theta_3$ | $\theta_4$ | $\tau$ | $\chi_{C1}$ | $\chi_{C2}$ |
|---------------|-------------------|--------------|------------|------------|------------|------------|--------|-------------|-------------|
| TS-1+CP       | 0.063             | -1.93        | -7.0       | 9.8        | -152.0     | 154.8      | 1.4    | 35.0        | 18.2        |
| TS-2+CP       | 0.063             | -1.85        | -6.1       | 13.7       | -150.6     | 158.2      | 3.8    | 35.5        | 15.8        |
| TS-3+CP       | 0.066             | -1.99        | -15.0      | 18.0       | -155.7     | 158.7      | 1.5    | 39.3        | 6.3         |
| TS-4+CP       | 0.064             | -1.87        | -13.1      | 8.4        | -157.4     | 152.7      | -2.3   | 35.7        | 14.2        |
| TS-5+CP       | 0.060             | -1.94        | 5.0        | 2.7        | -147.7     | 155.4      | 3.9    | 27.4        | 29.6        |
| TS-6+CP       | 0.060             | -1.39        | -13.5      | 16.4       | -159.9     | 162.8      | 1.4    | 33.6        | 3.7         |
| TS-7+CP       | 0.062             | -1.65        | -13.4      | 17.7       | -157.3     | 161.5      | 2.1    | 36.1        | 5.1         |
| TS-8+CP       | 0.069             | -2.48        | -12.5      | 13.0       | -151.3     | 151.8      | 0.3    | 41.2        | 15.7        |
| TS-9+CP       | 0.069             | -2.32        | -11.2      | 9.7        | -152.0     | 150.5      | -0.8   | 39.1        | 18.3        |
| TS-10+CP      | 0.065             | -2.22        | -0.6       | 17.7       | -142.9     | 160.0      | 8.5    | 37.7        | 19.4        |
| TS-11+CP      | 0.068             | -2.09        | 6.7        | 4.9        | -145.0     | 156.5      | 5.8    | 28.3        | 30.2        |
| TS-12+CP      | 0.070             | -2.44        | -22.3      | 16.4       | -159.1     | 153.3      | -2.9   | 43.2        | 4.5         |
| TS-13+CP      | 0.071             | -2.32        | -19.8      | 13.8       | -157.7     | 151.7      | -3.0   | 42.0        | 8.5         |
| TS-14+CP      | 0.070             | -2.37        | -10.2      | 22.3       | -148.2     | 160.3      | 6.1    | 42.0        | 9.5         |
| TS-15+CP      | 0.072             | -2.23        | -7.6       | 15.2       | -148.5     | 156.2      | 3.8    | 39.1        | 16.3        |
| TS-16+CP      | 0.069             | -2.25        | -17.7      | 14.6       | -156.8     | 153.7      | -1.6   | 40.9        | 8.6         |
| TS-17+CP      | 0.067             | -2.16        | 0.0        | 0.0        | -150.1     | 150.1      | 0.0    | 29.9        | 29.9        |
| TS-18+CP      | 0.068             | -2.25        | 5.2        | 3.0        | -145.7     | 154.0      | 4.1    | 29.1        | 31.3        |
| TS-19+CP      | 0.067             | -2.36        | -0.5       | 13.8       | -143.4     | 156.7      | 6.7    | 37.1        | 22.8        |
| TS-20+CP      | 0.068             | -2.37        | -11.6      | 3.1        | -154.3     | 145.8      | -4.2   | 37.3        | 22.6        |
| TS-21+CP      | 0.066             | -2.42        | -1.5       | 19.2       | -141.2     | 158.9      | 8.8    | 40.3        | 19.6        |
| TS-22+CP      | 0.064             | -1.72        | -9.8       | 21.3       | -153.0     | 164.5      | 5.8    | 36.9        | 5.7         |
| TS-23+CP      | 0.066             | -2.03        | -9.3       | 22.6       | -149.9     | 163.2      | 6.6    | 39.5        | 7.5         |
| TS-24+CP      | 0.064             | -2.15        | -0.4       | -1.6       | 148.8      | -150.8     | -1.0   | 30.8        | 29.6        |
| TS-25+CP      | 0.070             | -1.78        | 17.2       | -5.5       | 159.3      | -147.6     | 5.8    | 37.9        | 15.2        |
| TS-26+CP      | 0.075             | -2.60        | -18.3      | 9.0        | -155.6     | 146.3      | -4.6   | 42.7        | 15.4        |
| TS-27+CP      | 0.072             | -2.66        | -15.7      | -2.1       | -156.9     | 139.1      | -8.9   | 38.8        | 25.2        |
| TS-28+CP      | 0.073             | -2.67        | -4.9       | 7.6        | -146.3     | 149.0      | 1.3    | 38.6        | 26.1        |
| TS-29+CP      | 0.072             | -2.55        | -0.3       | 3.7        | -146.2     | 149.7      | 1.7    | 34.1        | 30.0        |
| TS-30+CP      | 0.072             | -2.63        | -7.2       | -6.0       | -153.7     | 140.5      | -6.6   | 33.5        | 32.3        |
| TS-31+CP      | 0.068             | -2.43        | -3.6       | 13.1       | -144.7     | 154.1      | 4.7    | 39.0        | 22.3        |
| TS-32+CP      | 0.077             | -2.46        | -6.6       | 18.9       | -145.0     | 157.3      | 6.1    | 41.6        | 16.1        |
| TS-33+CP      | 0.085             | -2.77        | 0.0        | 0.0        | -146.6     | 146.6      | 0.0    | 33.4        | 33.4        |
| TS-34+CP      | 0.082             | -2.91        | 11.7       | -14.5      | 147.2      | -150.0     | -1.4   | 44.6        | 18.3        |
| TS-35+CP      | 0.086             | -2.72        | -10.6      | 9.8        | -149.0     | 148.3      | -0.4   | 41.6        | 21.2        |
| TS-36+CP      | 0.077             | -2.76        | -15.0      | 6.4        | -152.2     | 143.6      | -4.3   | 42.8        | 21.4        |
| TS-37+CP      | 0.086             | -2.64        | -4.8       | -1.1       | -150.4     | 144.5      | -3.0   | 34.4        | 30.7        |
| TS-38+CP      | 0.078             | -2.91        | -6.7       | -3.2       | -150.5     | 140.6      | -5.0   | 36.1        | 32.7        |
| TS-39+CP      | 0.077             | -2.92        | 0.0        | 0.0        | -145.1     | 145.1      | 0.0    | 34.9        | 34.9        |
| TS-40+CP      | 0.077             | -2.98        | -9.3       | 3.0        | -148.7     | 142.4      | -3.2   | 40.6        | 28.3        |
| TS-41+CP      | 0.063             | -2.84        | 0.1        | 17.8       | -141.6     | 159.4      | 8.9    | 38.4        | 20.7        |
| TS-42+CP      | 0.070             | -3.52        | -1.7       | 12.4       | -140.8     | 151.5      | 5.3    | 40.9        | 26.8        |
| TS-43+CP      | 0.067             | -3.46        | 1.1        | 19.5       | -136.7     | 157.3      | 10.3   | 42.2        | 23.8        |
| TS-44+CP      | 0.068             | -3.28        | 1.9        | 3.3        | -144.3     | 149.5      | 2.6    | 33.8        | 32.4        |
| TS-45+CP      | 0.067             | -3.97        | -0.8       | 20.4       | -136.0     | 155.6      | 9.8    | 44.9        | 23.6        |
| TS-46+CP      | 0.074             | -3.93        | 0.2        | 0.7        | -143.0     | 143.8      | 0.4    | 36.8        | 36.4        |
| TS-47+CP      | 0.073             | -4.11        | -0.7       | 13.3       | -137.0     | 149.6      | 6.3    | 43.8        | 29.7        |
| TS-48+CP      | 0.067             | -2.51        | -6.5       | 11.0       | -148.6     | 153.1      | 2.2    | 37.9        | 20.4        |
| TS-49+CP      | 0.073             | -3.05        | -10.4      | 4.4        | -150.2     | 144.2      | -3.0   | 40.2        | 25.4        |
| TS-50+CP      | 0.070             | -2.98        | -3.4       | 14.1       | -142.4     | 153.1      | 5.3    | 41.0        | 23.5        |
| TS-51+CP      | 0.071             | -2.90        | -0.2       | 0.8        | -146.8     | 147.4      | 0.3    | 33.3        | 32.4        |
| TS-52+CP      | 0.073             | -3.36        | -9.1       | 8.5        | -146.7     | 146.1      | -0.3   | 42.4        | 24.8        |
| TS-53+CP      | 0.077             | -3.36        | -4.5       | -3.3       | -148.3     | 140.4      | -3.9   | 36.3        | 35.0        |
| TS-54+CP      | 0.075             | -3.46        | -7.8       | 7.1        | -144.9     | 144.2      | -0.3   | 42.9        | 28.0        |
| TS-55+CP      | 0.063             | -2.08        | 0.0        | 0.0        | -151.7     | 151.7      | 0.0    | 28.3        | 28.3        |
| TS-56+CP      | 0.064             | -2.55        | -7.0       | 8.7        | -149.6     | 151.2      | 0.8    | 37.4        | 21.7        |
| TS-57+CP      | 0.068             | -2.38        | -4.0       | 10.9       | -146.3     | 153.3      | 3.5    | 37.6        | 22.8        |
| TS-58+CP      | 0.074             | -2.94        | -12.0      | 4.0        | -150.5     | 142.4      | -4.0   | 41.5        | 25.6        |
| TS-59+CP      | 0.071             | -2.81        | 1.0        | 14.8       | -138.8     | 154.6      | 7.9    | 40.3        | 26.4        |
| TS-60+CP      | 0.073             | -2.71        | 4.1        | 1.8        | -143.5     | 149.4      | 2.9    | 32.4        | 34.7        |
| TS-61+CP      | 0.074             | -3.13        | -11.8      | 6.3        | -148.7     | 143.2      | -2.8   | 43.1        | 25.0        |
| TS-62+CP      | 0.079             | -2.98        | -4.3       | -5.4       | -149.4     | 139.8      | -4.8   | 34.8        | 35.9        |
| TS-63+CP      | 0.079             | -3.10        | -8.2       | 6.4        | -145.6     | 143.7      | -0.9   | 42.7        | 28.0        |
| TS-64+CP      | 0.067             | -2.34        | -4.3       | 14.0       | -146.2     | 155.9      | 4.8    | 38.1        | 19.8        |
| TS-65+CP      | 0.073             | -2.96        | -9.8       | 7.1        | -148.3     | 145.6      | -1.4   | 41.6        | 24.6        |
| TS-66+CP      | 0.072             | -2.71        | -0.5       | 15.8       | -140.6     | 155.9      | 7.6    | 39.9        | 23.6        |
| TS-67+CP      | 0.072             | -2.71        | 3.5        | 3.4        | -143.5     | 150.4      | 3.4    | 33.0        | 33.1        |
| TS-68+CP      | 0.073             | -3.14        | -9.8       | 11.0       | -146.2     | 147.5      | 0.6    | 43.5        | 22.8        |
| TS-69+CP      | 0.078             | -3.11        | -3.3       | -2.7       | -147.4     | 141.4      | -3.0   | 35.9        | 35.3        |
| TS-70+CP      | 0.080             | -3.11        | -7.1       | 8.4        | -144.8     | 146.1      | 0.6    | 42.3        | 26.8        |

**Table S43.**  $\Delta d_{C1C2}$ ,  $\Delta\phi$ ,  $\theta_{1-4}$ ,  $\tau$ ,  $\chi_{C1}$  and  $\chi_{C2}$  values for the dienophile fragments derived from the transition structures of **CH**.

| fragment from | $\Delta d_{C1C2}$ | $\Delta\phi$ | $\theta_1$ | $\theta_2$ | $\theta_3$ | $\theta_4$ | $\tau$ | $\chi_{C1}$ | $\chi_{C2}$ |
|---------------|-------------------|--------------|------------|------------|------------|------------|--------|-------------|-------------|
| TS-1+CH       | 0.060             | -1.98        | -5.8       | 9.9        | -150.8     | 155.0      | 2.1    | 34.9        | 19.2        |
| TS-2+CH       | 0.059             | -1.85        | -4.2       | 15.4       | -148.9     | 160.0      | 5.6    | 35.3        | 15.7        |
| TS-3+CH       | 0.064             | -2.03        | -14.4      | 21.3       | -154.5     | 161.5      | 3.5    | 39.8        | 4.1         |
| TS-4+CH       | 0.062             | -1.92        | -13.0      | 6.7        | -157.5     | 151.2      | -3.1   | 35.5        | 15.8        |
| TS-5+CH       | 0.058             | -2.06        | 4.3        | 1.7        | -147.8     | 153.9      | 3.0    | 27.8        | 30.5        |
| TS-6+CH       | 0.056             | -1.36        | -11.5      | 18.6       | -158.3     | 165.4      | 3.5    | 33.3        | 3.1         |
| TS-7+CH       | 0.059             | -1.65        | -11.6      | 19.7       | -155.5     | 163.6      | 4.1    | 36.1        | 4.8         |
| TS-8+CH       | 0.068             | -2.65        | -12.7      | 16.6       | -149.6     | 153.5      | 2.0    | 43.1        | 13.8        |
| TS-9+CH       | 0.066             | -2.39        | -10.4      | 10.9       | -150.8     | 151.3      | 0.3    | 39.6        | 18.3        |
| TS-10+CH      | 0.068             | -2.40        | -14.9      | 17.7       | -153.1     | 155.8      | 1.4    | 41.9        | 9.2         |
| TS-11+CH      | 0.065             | -2.15        | 8.1        | 5.7        | -143.5     | 157.3      | 6.9    | 28.4        | 30.8        |
| TS-12+CH      | 0.069             | -2.53        | -25.2      | 19.8       | -161.2     | 155.8      | -2.7   | 44.0        | -0.9        |
| TS-13+CH      | 0.070             | -2.40        | -20.7      | 15.0       | -157.8     | 152.2      | -2.8   | 42.8        | 7.1         |
| TS-14+CH      | 0.070             | -2.53        | -9.4       | 28.4       | -145.5     | 164.5      | 9.5    | 43.9        | 6.1         |
| TS-15+CH      | 0.069             | -2.26        | -5.9       | 18.3       | -146.3     | 158.7      | 6.2    | 39.6        | 15.4        |
| TS-16+CH      | 0.074             | -2.62        | -20.1      | 18.6       | -155.9     | 154.3      | -0.8   | 44.3        | 5.5         |
| TS-17+CH      | 0.064             | -2.20        | 0.0        | 0.0        | -150.0     | 150.0      | 0.0    | 30.0        | 30.0        |
| TS-18+CH      | 0.066             | -2.35        | -6.4       | -1.4       | 145.4      | -153.2     | -3.9   | 28.1        | 33.2        |
| TS-19+CH      | 0.065             | -2.52        | 0.9        | 13.2       | -141.8     | 155.9      | 7.1    | 37.4        | 25.0        |
| TS-20+CH      | 0.067             | -2.54        | -10.5      | 5.2        | -151.9     | 146.5      | -2.7   | 38.7        | 23.0        |
| TS-21+CH      | 0.064             | -2.64        | -1.8       | 17.4       | -140.7     | 156.3      | 7.8    | 41.1        | 21.9        |
| TS-22+CH      | 0.061             | -1.80        | -7.0       | 26.9       | -149.0     | 168.9      | 10.0   | 38.0        | 4.2         |
| TS-23+CH      | 0.064             | -2.14        | -5.8       | 28.1       | -145.2     | 167.5      | 11.1   | 40.6        | 6.7         |
| TS-24+CH      | 0.062             | -2.16        | -1.9       | 1.9        | -149.8     | 149.9      | 0.0    | 32.0        | 28.3        |
| TS-25+CH      | 0.068             | -1.87        | 15.0       | -5.5       | 157.2      | -147.6     | 4.8    | 37.9        | 17.4        |
| TS-26+CH      | 0.077             | -2.84        | -20.1      | 12.9       | -154.8     | 147.5      | -3.6   | 45.4        | 12.3        |
| TS-27+CH      | 0.071             | -2.83        | -13.1      | 1.2        | -153.2     | 141.3      | -5.9   | 39.9        | 25.7        |
| TS-28+CH      | 0.073             | -2.99        | -2.4       | 10.7       | -141.7     | 150.0      | 4.2    | 40.7        | 27.6        |
| TS-29+CH      | 0.071             | -2.71        | -0.3       | -5.9       | 144.1      | -150.3     | -3.1   | 35.7        | 30.0        |
| TS-30+CH      | 0.069             | -2.77        | -7.2       | -3.8       | -151.9     | 140.9      | -5.5   | 35.3        | 31.9        |
| TS-31+CH      | 0.070             | -2.51        | -8.5       | 14.7       | -147.1     | 153.3      | 3.1    | 41.4        | 18.1        |
| TS-32+CH      | 0.079             | -2.70        | -8.5       | 20.5       | -144.6     | 156.7      | 6.0    | 43.9        | 14.8        |
| TS-33+CH      | 0.086             | -2.92        | 0.0        | 0.0        | -145.8     | 145.8      | 0.0    | 34.2        | 34.2        |
| TS-34+CH      | 0.086             | -3.19        | -13.0      | 17.8       | -145.7     | 150.6      | 2.4    | 47.3        | 16.4        |
| TS-35+CH      | 0.086             | -2.88        | -9.5       | 9.7        | -147.4     | 147.6      | 0.1    | 42.0        | 22.9        |
| TS-36+CH      | 0.075             | -2.97        | -9.3       | 13.2       | -144.9     | 148.8      | 1.9    | 44.4        | 21.9        |
| TS-37+CH      | 0.083             | -2.75        | -4.4       | 1.3        | -148.4     | 145.2      | -1.6   | 36.0        | 30.3        |
| TS-38+CH      | 0.077             | -3.13        | 1.1        | 4.2        | 147.0      | -141.8     | 2.6    | 34.1        | 37.1        |
| TS-39+CH      | 0.077             | -3.21        | 0.0        | 0.0        | -143.5     | 143.5      | 0.0    | 36.5        | 36.5        |
| TS-40+CH      | 0.076             | -3.28        | -4.3       | 7.8        | -142.1     | 145.7      | 1.8    | 42.2        | 30.1        |
| TS-41+CH      | 0.058             | -2.71        | 1.2        | 18.0       | -141.6     | 160.8      | 9.6    | 37.2        | 20.4        |
| TS-42+CH      | 0.066             | -3.62        | -0.8       | 15.0       | -139.3     | 153.5      | 7.1    | 41.5        | 25.7        |
| TS-43+CH      | 0.065             | -3.58        | 3.3        | 23.6       | -133.0     | 160.0      | 13.5   | 43.6        | 23.4        |
| TS-44+CH      | 0.065             | -3.22        | 3.3        | 6.0        | -142.7     | 152.0      | 4.6    | 34.0        | 31.3        |
| TS-45+CH      | 0.066             | -4.12        | -1.0       | 24.1       | -134.7     | 157.7      | 11.5   | 46.3        | 21.2        |
| TS-46+CH      | 0.072             | -4.12        | 1.2        | 5.7        | -139.7     | 146.7      | 3.5    | 39.1        | 34.5        |
| TS-47+CH      | 0.071             | -4.38        | 0.8        | 18.8       | -133.0     | 152.6      | 9.8    | 46.3        | 28.2        |
| TS-48+CH      | 0.061             | -2.41        | -5.0       | 11.0       | -148.2     | 154.3      | 3.0    | 36.7        | 20.7        |
| TS-49+CH      | 0.068             | -3.14        | -9.4       | 6.4        | -148.5     | 145.6      | -1.5   | 40.9        | 25.0        |
| TS-50+CH      | 0.065             | -3.09        | -2.1       | 13.4       | -141.3     | 152.6      | 5.7    | 40.8        | 25.3        |
| TS-51+CH      | 0.067             | -2.93        | 1.3        | 1.7        | -145.5     | 148.5      | 1.5    | 33.2        | 32.8        |
| TS-52+CH      | 0.071             | -3.50        | -10.2      | 11.6       | -146.0     | 147.4      | 0.7    | 44.3        | 22.4        |
| TS-53+CH      | 0.075             | -3.54        | -3.7       | 0.9        | -145.1     | 142.3      | -1.4   | 38.6        | 34.0        |
| TS-54+CH      | 0.072             | -3.72        | -6.1       | 12.1       | -140.7     | 146.7      | 3.0    | 45.4        | 27.2        |
| TS-55+CH      | 0.058             | -1.92        | 0.0        | 0.0        | -152.8     | 152.8      | 0.0    | 27.2        | 27.2        |
| TS-56+CH      | 0.059             | -2.49        | -4.7       | 9.3        | -148.3     | 152.8      | 2.3    | 36.5        | 22.5        |
| TS-57+CH      | 0.063             | -2.32        | -2.1       | 12.5       | -145.0     | 155.5      | 5.2    | 37.0        | 22.5        |
| TS-58+CH      | 0.071             | -2.99        | -11.7      | 6.0        | -149.4     | 143.7      | -2.8   | 42.3        | 24.6        |
| TS-59+CH      | 0.067             | -2.96        | 3.2        | 14.9       | -136.6     | 154.7      | 9.0    | 40.2        | 28.5        |
| TS-60+CH      | 0.071             | -2.86        | 6.2        | 3.7        | -140.7     | 150.7      | 5.0    | 33.1        | 35.6        |
| TS-61+CH      | 0.074             | -3.33        | -13.5      | 11.1       | -147.5     | 145.1      | -1.2   | 46.0        | 21.4        |
| TS-62+CH      | 0.079             | -3.23        | -3.4       | 1.2        | -144.4     | 142.2      | -1.1   | 38.9        | 34.4        |
| TS-63+CH      | 0.077             | -3.39        | -6.0       | 13.5       | -139.9     | 147.4      | 3.7    | 46.1        | 26.6        |
| TS-64+CH      | 0.063             | -2.27        | -2.8       | 14.7       | -145.5     | 157.4      | 6.0    | 37.3        | 19.8        |
| TS-65+CH      | 0.071             | -3.00        | -9.4       | 9.5        | -147.1     | 147.2      | 0.0    | 42.3        | 23.4        |
| TS-66+CH      | 0.069             | -2.80        | 0.9        | 14.8       | -139.7     | 155.4      | 7.8    | 39.5        | 25.5        |
| TS-67+CH      | 0.070             | -2.78        | 4.8        | 3.6        | -142.4     | 150.8      | 4.2    | 32.8        | 34.0        |
| TS-68+CH      | 0.076             | -3.41        | -11.8      | 16.7       | -144.9     | 149.8      | 2.4    | 46.9        | 18.3        |
| TS-69+CH      | 0.078             | -3.31        | -2.6       | 2.5        | -143.5     | 143.4      | 0.0    | 39.0        | 34.0        |
| TS-70+CH      | 0.081             | -3.38        | -5.5       | 14.3       | -140.2     | 149.0      | 4.4    | 45.3        | 25.5        |



Table S44.  $\Delta d_{C1C2}$ ,  $\Delta\phi$ ,  $\theta_{1-4}$ ,  $\tau$ ,  $\chi_{C1}$  and  $\chi_{C2}$  values for the dienophile fragments derived from the transition structures of BU.

| fragment from | $\Delta d_{C1C2}$ | $\Delta\phi$ | $\theta_1$ | $\theta_2$ | $\theta_3$ | $\theta_4$ | $\tau$ | $\chi_{C1}$ | $\chi_{C2}$ |
|---------------|-------------------|--------------|------------|------------|------------|------------|--------|-------------|-------------|
| TS-1+BU       | 0.060             | -2.03        | -5.2       | 9.4        | -150.3     | 154.5      | 2.1    | 34.9        | 20.3        |
| TS-2+BU       | 0.058             | -1.92        | -2.1       | 16.0       | -146.7     | 160.6      | 6.9    | 35.4        | 17.3        |
| TS-3+BU       | 0.060             | -1.89        | -10.3      | 21.5       | -152.0     | 163.3      | 5.6    | 38.3        | 6.4         |
| TS-4+BU       | 0.060             | -1.96        | -11.0      | 4.6        | -156.4     | 150.1      | -3.2   | 34.5        | 18.9        |
| TS-5+BU       | 0.058             | -2.13        | 4.8        | 1.4        | -147.4     | 153.6      | 3.1    | 27.8        | 31.3        |
| TS-6+BU       | 0.052             | -1.24        | -11.5      | 18.7       | -159.6     | 166.8      | 3.6    | 31.9        | 1.7         |
| TS-7+BU       | 0.055             | -1.49        | -10.6      | 19.6       | -156.2     | 165.2      | 4.5    | 34.4        | 4.2         |
| TS-8+BU       | 0.060             | -2.23        | -4.0       | 25.7       | -143.7     | 165.4      | 10.8   | 40.3        | 10.6        |
| TS-9+BU       | 0.060             | -2.04        | -4.1       | 19.5       | -146.3     | 161.7      | 7.7    | 37.8        | 14.2        |
| TS-10+BU      | 0.060             | -2.28        | 0.7        | 15.3       | -142.7     | 158.8      | 8.0    | 36.6        | 21.9        |
| TS-11+BU      | 0.063             | -2.17        | 4.7        | 4.4        | -145.8     | 154.9      | 4.6    | 29.5        | 29.8        |
| TS-12+BU      | 0.057             | -1.94        | -12.2      | 26.5       | -153.3     | 167.7      | 7.2    | 38.9        | 0.1         |
| TS-13+BU      | 0.059             | -1.86        | -11.5      | 22.2       | -153.4     | 164.1      | 5.3    | 38.1        | 4.4         |
| TS-14+BU      | 0.064             | -2.29        | -7.1       | 24.8       | -145.9     | 163.7      | 8.9    | 41.1        | 9.3         |
| TS-15+BU      | 0.065             | -2.23        | -4.9       | 16.4       | -146.4     | 157.9      | 5.8    | 38.5        | 17.2        |
| TS-16+BU      | 0.067             | -2.33        | -11.1      | 21.1       | -149.8     | 159.8      | 5.0    | 41.3        | 9.1         |
| TS-17+BU      | 0.064             | -2.28        | 0.0        | 0.0        | -149.4     | 149.4      | 0.0    | 30.6        | 30.6        |
| TS-18+BU      | 0.064             | -2.27        | 2.1        | -3.2       | -150.6     | 149.5      | -0.6   | 27.3        | 32.7        |
| TS-19+BU      | 0.063             | -2.34        | -3.0       | 7.6        | -147.7     | 152.3      | 2.3    | 35.3        | 24.7        |
| TS-20+BU      | 0.064             | -2.35        | -5.3       | 10.6       | -147.9     | 153.2      | 2.7    | 37.4        | 21.4        |
| TS-21+BU      | 0.061             | -2.37        | -2.4       | 12.8       | -144.7     | 155.2      | 5.2    | 37.6        | 22.4        |
| TS-22+BU      | 0.057             | -1.59        | -9.7       | 22.5       | -154.2     | 167.0      | 6.4    | 35.5        | 3.3         |
| TS-23+BU      | 0.059             | -1.89        | -8.5       | 22.7       | -150.5     | 164.8      | 7.1    | 38.0        | 6.8         |
| TS-24+BU      | 0.059             | -2.03        | 8.2        | 5.0        | 157.5      | -144.4     | 6.6    | 30.7        | 27.5        |
| TS-25+BU      | 0.067             | -1.97        | 14.8       | -5.3       | 156.4      | -146.9     | 4.8    | 38.4        | 18.3        |
| TS-26+BU      | 0.071             | -2.63        | -9.8       | 17.5       | -147.2     | 154.9      | 3.9    | 42.7        | 15.3        |
| TS-27+BU      | 0.067             | -2.51        | -3.8       | 10.2       | -146.1     | 152.5      | 3.2    | 37.7        | 23.7        |
| TS-28+BU      | 0.068             | -2.63        | -3.3       | 9.3        | -145.2     | 151.3      | 3.0    | 38.0        | 25.5        |
| TS-29+BU      | 0.069             | -2.66        | -2.5       | 2.6        | -147.5     | 147.6      | 0.1    | 35.0        | 29.9        |
| TS-30+BU      | 0.067             | -2.60        | -2.0       | 1.7        | -147.8     | 147.5      | -0.2   | 34.2        | 30.5        |
| TS-31+BU      | 0.063             | -2.47        | 2.0        | 15.7       | -140.1     | 157.8      | 8.8    | 37.8        | 24.2        |
| TS-32+BU      | 0.072             | -2.53        | -10.2      | 13.6       | -148.8     | 152.2      | 1.7    | 41.4        | 17.6        |
| TS-33+BU      | 0.077             | -2.71        | 0.0        | 0.0        | -147.1     | 147.1      | 0.0    | 32.9        | 32.9        |
| TS-34+BU      | 0.077             | -2.84        | -6.9       | 16.4       | -144.0     | 153.5      | 4.8    | 42.9        | 19.6        |
| TS-35+BU      | 0.078             | -2.61        | -4.5       | 9.7        | -146.1     | 151.3      | 2.6    | 38.5        | 24.2        |
| TS-36+BU      | 0.068             | -2.43        | -1.3       | 21.9       | -140.5     | 161.1      | 10.3   | 40.8        | 17.6        |
| TS-37+BU      | 0.075             | -2.48        | -0.4       | 10.7       | -143.9     | 154.3      | 5.2    | 36.5        | 25.4        |
| TS-38+BU      | 0.072             | -2.82        | 2.0        | 2.8        | -144.0     | 148.8      | 2.4    | 34.0        | 33.1        |
| TS-39+BU      | 0.072             | -2.86        | 0.0        | 0.0        | -145.9     | 145.9      | 0.0    | 34.1        | 34.1        |
| TS-40+BU      | 0.072             | -2.85        | -0.2       | 13.2       | -140.4     | 153.4      | 6.5    | 39.8        | 26.4        |
| TS-41+BU      | 0.057             | -2.77        | 3.1        | 20.9       | -139.2     | 163.1      | 12.0   | 37.8        | 20.0        |
| TS-42+BU      | 0.061             | -3.18        | 2.3        | 24.2       | -136.5     | 163.0      | 13.2   | 41.2        | 19.2        |
| TS-43+BU      | 0.062             | -3.46        | 4.0        | 20.5       | -135.0     | 159.5      | 12.2   | 41.0        | 24.5        |
| TS-44+BU      | 0.062             | -3.22        | 3.8        | 7.2        | -142.0     | 153.1      | 5.5    | 34.2        | 30.7        |
| TS-45+BU      | 0.058             | -3.50        | 2.0        | 29.8       | -133.9     | 165.7      | 15.9   | 44.1        | 16.2        |
| TS-46+BU      | 0.067             | -3.74        | 3.5        | 13.6       | -137.0     | 154.2      | 8.6    | 39.5        | 29.4        |
| TS-47+BU      | 0.065             | -3.88        | 3.6        | 25.1       | -131.9     | 160.6      | 14.3   | 44.5        | 22.9        |
| TS-48+BU      | 0.061             | -2.50        | -3.4       | 12.3       | -146.4     | 155.2      | 4.4    | 37.1        | 21.4        |
| TS-49+BU      | 0.065             | -2.82        | -4.8       | 17.0       | -144.0     | 156.1      | 6.1    | 40.8        | 19.1        |
| TS-50+BU      | 0.064             | -2.96        | -2.6       | 11.1       | -143.5     | 152.0      | 4.3    | 39.0        | 25.4        |
| TS-51+BU      | 0.065             | -2.91        | -0.1       | -0.1       | -147.4     | 147.2      | -0.1   | 32.7        | 32.7        |
| TS-52+BU      | 0.065             | -3.15        | -4.3       | 21.5       | -140.8     | 158.1      | 8.6    | 43.4        | 17.6        |
| TS-53+BU      | 0.070             | -3.22        | -1.0       | 7.2        | -142.8     | 149.0      | 3.1    | 38.2        | 30.0        |
| TS-54+BU      | 0.068             | -3.25        | -4.0       | 16.3       | -140.9     | 153.2      | 6.1    | 43.1        | 22.8        |
| TS-55+BU      | 0.057             | -2.03        | 0.0        | 0.1        | -152.1     | 152.2      | 0.0    | 27.9        | 27.8        |
| TS-56+BU      | 0.059             | -2.59        | -3.6       | 9.9        | -146.8     | 153.1      | 3.2    | 36.9        | 23.3        |
| TS-57+BU      | 0.064             | -2.41        | 0.1        | 14.7       | -142.3     | 157.2      | 7.4    | 37.5        | 22.9        |
| TS-58+BU      | 0.068             | -2.65        | -4.5       | 17.7       | -143.0     | 156.2      | 6.6    | 41.5        | 19.3        |
| TS-59+BU      | 0.066             | -2.85        | 3.2        | 14.0       | -137.9     | 155.1      | 8.6    | 38.9        | 28.1        |
| TS-60+BU      | 0.069             | -2.81        | 4.5        | 1.9        | -142.9     | 149.4      | 3.2    | 32.5        | 35.2        |
| TS-61+BU      | 0.070             | -2.96        | -4.9       | 23.6       | -140.1     | 158.9      | 9.4    | 44.7        | 16.3        |
| TS-62+BU      | 0.075             | -2.96        | 1.2        | 11.0       | -139.5     | 151.8      | 6.1    | 39.3        | 29.5        |
| TS-63+BU      | 0.074             | -2.94        | -1.1       | 22.1       | -137.0     | 158.0      | 10.5   | 44.1        | 20.9        |
| TS-64+BU      | 0.063             | -2.33        | -0.7       | 16.4       | -143.2     | 159.0      | 7.9    | 37.5        | 20.4        |
| TS-65+BU      | 0.067             | -2.59        | -3.9       | 19.0       | -143.0     | 158.0      | 7.5    | 40.9        | 18.1        |
| TS-66+BU      | 0.066             | -2.63        | 1.9        | 14.3       | -140.4     | 156.7      | 8.1    | 37.6        | 25.2        |
| TS-67+BU      | 0.067             | -2.68        | 4.6        | 4.0        | -143.1     | 151.7      | 4.3    | 32.3        | 32.9        |
| TS-68+BU      | 0.068             | -2.87        | -4.6       | 24.8       | -140.6     | 160.8      | 10.1   | 44.0        | 14.6        |
| TS-69+BU      | 0.073             | -2.94        | 1.7        | 10.5       | -140.0     | 152.2      | 6.1    | 38.3        | 29.5        |
| TS-70+BU      | 0.074             | -2.84        | -1.5       | 20.8       | -139.0     | 158.3      | 9.6    | 42.5        | 20.1        |

Table S45.  $\Delta d_{C1C2}$ ,  $\Delta\phi$ ,  $\theta_{1-4}$ ,  $\tau$ ,  $\chi_{C1}$  and  $\chi_{C2}$  values for the dienophile fragments derived from the transition structures of DMB.

| fragment from | $\Delta d_{C1C2}$ | $\Delta\phi$ | $\theta_1$ | $\theta_2$ | $\theta_3$ | $\theta_4$ | $\tau$ | $\chi_{C1}$ | $\chi_{C2}$ |
|---------------|-------------------|--------------|------------|------------|------------|------------|--------|-------------|-------------|
| TS-1+DMB      | 0.062             | -2.08        | -8.9       | 10.1       | -152.2     | 153.5      | 0.6    | 36.6        | 17.6        |
| TS-2+DMB      | 0.060             | -1.97        | -4.3       | 17.0       | -147.5     | 160.3      | 6.4    | 36.8        | 15.4        |
| TS-3+DMB      | 0.061             | -1.94        | -12.9      | 22.8       | -153.8     | 163.7      | 4.9    | 39.1        | 3.5         |
| TS-4+DMB      | 0.063             | -2.05        | -15.5      | 8.6        | -158.0     | 151.1      | -3.4   | 37.5        | 13.3        |
| TS-5+DMB      | 0.059             | -2.12        | 2.2        | 1.0        | -148.9     | 152.1      | 1.6    | 28.9        | 30.2        |
| TS-6+DMB      | 0.054             | -1.32        | -13.0      | 19.6       | -160.1     | 166.7      | 3.3    | 32.9        | 0.3         |
| TS-7+DMB      | 0.056             | -1.57        | -12.5      | 20.4       | -157.1     | 165.0      | 3.9    | 35.4        | 2.5         |
| TS-8+DMB      | 0.061             | -2.28        | -6.0       | 26.2       | -145.0     | 165.1      | 10.1   | 41.1        | 8.9         |
| TS-9+DMB      | 0.062             | -2.10        | -6.5       | 20.3       | -147.5     | 161.3      | 6.9    | 39.0        | 12.2        |
| TS-10+DMB     | 0.062             | -2.31        | -0.7       | 17.1       | -142.9     | 159.2      | 8.2    | 37.9        | 20.0        |
| TS-11+DMB     | 0.064             | -2.16        | 6.1        | 3.9        | -145.4     | 155.5      | 5.0    | 28.5        | 30.7        |
| TS-12+DMB     | 0.056             | -1.90        | -14.3      | 25.7       | -155.8     | 167.2      | 5.7    | 38.5        | -1.5        |
| TS-13+DMB     | 0.060             | -1.86        | -14.0      | 21.8       | -155.6     | 163.3      | 3.9    | 38.4        | 2.7         |
| TS-14+DMB     | 0.066             | -2.31        | -10.6      | 25.5       | -148.8     | 163.6      | 7.4    | 41.9        | 5.7         |
| TS-15+DMB     | 0.067             | -2.27        | -8.8       | 18.9       | -148.4     | 158.5      | 5.1    | 40.4        | 12.7        |
| TS-16+DMB     | 0.067             | -2.30        | -16.6      | 19.1       | -155.0     | 157.5      | 1.3    | 41.5        | 5.9         |
| TS-17+DMB     | 0.065             | -2.24        | 0.0        | 0.0        | -149.8     | 149.8      | 0.0    | 30.2        | 30.2        |
| TS-18+DMB     | 0.064             | -2.22        | -3.4       | 1.2        | -151.4     | 149.2      | -1.1   | 32.0        | 27.4        |
| TS-19+DMB     | 0.064             | -2.32        | -6.1       | 8.4        | -149.5     | 151.7      | 1.1    | 36.6        | 22.2        |
| TS-20+DMB     | 0.065             | -2.35        | -8.6       | 10.3       | -150.2     | 151.9      | 0.9    | 38.4        | 19.5        |
| TS-21+DMB     | 0.062             | -2.40        | -4.2       | 13.9       | -145.4     | 155.0      | 4.8    | 38.9        | 20.7        |
| TS-22+DMB     | 0.057             | -1.64        | -10.7      | 23.5       | -154.5     | 167.3      | 6.4    | 36.2        | 2.1         |
| TS-23+DMB     | 0.060             | -1.93        | -9.8       | 24.1       | -151.2     | 165.4      | 7.1    | 38.7        | 4.7         |
| TS-24+DMB     | 0.060             | -1.97        | 8.2        | 5.5        | 158.2      | -144.5     | 6.9    | 30.0        | 27.3        |
| TS-25+DMB     | 0.069             | -2.00        | 18.5       | -7.8       | 158.0      | -147.3     | 5.3    | 40.4        | 14.2        |
| TS-26+DMB     | 0.072             | -2.58        | -13.6      | 18.4       | -150.2     | 155.0      | 2.4    | 43.4        | 11.4        |
| TS-27+DMB     | 0.068             | -2.55        | -7.4       | 9.4        | -148.4     | 150.4      | 1.0    | 39.0        | 22.2        |
| TS-28+DMB     | 0.069             | -2.61        | -6.8       | 9.1        | -147.7     | 150.0      | 1.2    | 39.1        | 23.2        |
| TS-29+DMB     | 0.070             | -2.61        | -4.3       | 0.6        | -149.7     | 146.0      | -1.9   | 34.6        | 29.7        |
| TS-30+DMB     | 0.068             | -2.53        | -2.6       | 1.5        | -148.7     | 147.5      | -0.6   | 34.0        | 29.9        |
| TS-31+DMB     | 0.064             | -2.48        | -0.8       | 15.2       | -142.0     | 156.4      | 7.2    | 38.8        | 22.8        |
| TS-32+DMB     | 0.075             | -2.56        | -10.9      | 19.3       | -147.7     | 156.1      | 4.2    | 43.2        | 13.0        |
| TS-33+DMB     | 0.079             | -2.64        | 0.0        | 0.0        | -147.6     | 147.6      | 0.0    | 32.4        | 32.4        |
| TS-34+DMB     | 0.079             | -2.82        | -11.8      | 18.1       | -147.4     | 153.7      | 3.2    | 44.4        | 14.6        |
| TS-35+DMB     | 0.080             | -2.61        | -5.3       | 15.0       | -144.8     | 154.5      | 4.9    | 40.5        | 20.2        |
| TS-36+DMB     | 0.069             | -2.45        | -3.7       | 22.2       | -142.0     | 160.5      | 9.3    | 41.7        | 15.8        |
| TS-37+DMB     | 0.076             | -2.41        | -2.0       | 13.1       | -144.4     | 155.5      | 5.6    | 37.6        | 22.5        |
| TS-38+DMB     | 0.073             | -2.80        | 0.0        | -1.0       | -147.0     | 146.0      | -0.5   | 33.0        | 34.0        |
| TS-39+DMB     | 0.074             | -2.78        | 0.0        | 0.0        | -146.4     | 146.4      | 0.0    | 33.6        | 33.6        |
| TS-40+DMB     | 0.073             | -2.86        | -5.2       | 10.5       | -144.4     | 149.7      | 2.7    | 40.8        | 25.1        |
| TS-41+DMB     | 0.059             | -2.81        | 2.0        | 22.4       | -139.1     | 163.5      | 12.2   | 38.9        | 18.5        |
| TS-42+DMB     | 0.062             | -3.20        | 1.4        | 27.0       | -136.2     | 164.6      | 14.2   | 42.4        | 16.8        |
| TS-43+DMB     | 0.063             | -3.43        | 2.4        | 20.4       | -136.2     | 159.1      | 11.4   | 41.4        | 23.3        |
| TS-44+DMB     | 0.063             | -3.18        | 2.0        | 3.6        | -144.8     | 150.5      | 2.8    | 33.2        | 31.6        |
| TS-45+DMB     | 0.059             | -3.46        | 1.3        | 32.8       | -133.9     | 167.9      | 17.0   | 44.8        | 13.4        |
| TS-46+DMB     | 0.067             | -3.65        | 2.6        | 13.7       | -137.9     | 154.2      | 8.2    | 39.5        | 28.4        |
| TS-47+DMB     | 0.066             | -3.85        | 2.7        | 26.9       | -132.1     | 161.7      | 14.8   | 45.2        | 21.0        |
| TS-48+DMB     | 0.063             | -2.55        | -4.3       | 14.2       | -145.9     | 155.9      | 5.0    | 38.3        | 19.9        |
| TS-49+DMB     | 0.066             | -2.85        | -5.8       | 18.5       | -144.0     | 156.7      | 6.4    | 41.8        | 17.5        |
| TS-50+DMB     | 0.065             | -2.94        | -2.9       | 12.6       | -143.3     | 152.9      | 4.8    | 39.7        | 24.2        |
| TS-51+DMB     | 0.066             | -2.90        | -0.3       | -1.4       | -148.2     | 146.5      | -0.8   | 32.1        | 33.2        |
| TS-52+DMB     | 0.067             | -3.20        | -5.5       | 24.1       | -140.8     | 159.4      | 9.3    | 44.7        | 15.1        |
| TS-53+DMB     | 0.070             | -3.17        | -1.9       | 6.6        | -143.7     | 148.5      | 2.4    | 38.2        | 29.7        |
| TS-54+DMB     | 0.069             | -3.26        | -4.8       | 17.7       | -141.0     | 153.8      | 6.4    | 43.9        | 21.3        |
| TS-55+DMB     | 0.059             | -1.97        | 0.0        | 0.0        | -152.5     | 152.5      | 0.0    | 27.5        | 27.5        |
| TS-56+DMB     | 0.061             | -2.57        | -5.5       | 11.3       | -147.6     | 153.5      | 2.9    | 37.9        | 21.1        |
| TS-57+DMB     | 0.065             | -2.40        | 0.5        | 16.2       | -141.6     | 158.3      | 8.4    | 37.9        | 22.2        |
| TS-58+DMB     | 0.069             | -2.67        | -5.6       | 19.5       | -143.1     | 157.1      | 7.0    | 42.4        | 17.3        |
| TS-59+DMB     | 0.067             | -2.83        | 3.4        | 15.1       | -137.4     | 156.0      | 9.3    | 39.2        | 27.5        |
| TS-60+DMB     | 0.070             | -2.81        | 6.1        | 1.6        | -142.3     | 150.0      | 3.8    | 31.5        | 36.1        |
| TS-61+DMB     | 0.071             | -2.97        | -6.1       | 25.0       | -140.8     | 159.6      | 9.4    | 45.4        | 14.3        |
| TS-62+DMB     | 0.075             | -2.90        | 1.4        | 11.0       | -139.7     | 152.1      | 6.2    | 38.9        | 29.2        |
| TS-63+DMB     | 0.074             | -2.92        | -1.4       | 22.8       | -137.1     | 158.5      | 10.7   | 44.3        | 20.1        |
| TS-64+DMB     | 0.064             | -2.31        | -1.0       | 18.2       | -143.0     | 160.2      | 8.6    | 38.1        | 18.8        |
| TS-65+DMB     | 0.068             | -2.57        | -5.0       | 20.1       | -143.6     | 158.6      | 7.5    | 41.4        | 16.4        |
| TS-66+DMB     | 0.067             | -2.60        | 1.9        | 16.3       | -139.9     | 158.1      | 9.1    | 38.2        | 23.8        |
| TS-67+DMB     | 0.068             | -2.65        | 5.8        | 3.9        | -142.7     | 152.3      | 4.8    | 31.5        | 33.4        |
| TS-68+DMB     | 0.068             | -2.79        | -6.6       | 25.0       | -142.6     | 161.0      | 9.2    | 44.0        | 12.4        |
| TS-69+DMB     | 0.073             | -2.88        | 1.4        | 10.7       | -140.4     | 152.5      | 6.0    | 38.1        | 28.9        |
| TS-70+DMB     | 0.075             | -2.80        | -2.1       | 21.3       | -139.5     | 158.7      | 9.6    | 42.6        | 19.2        |

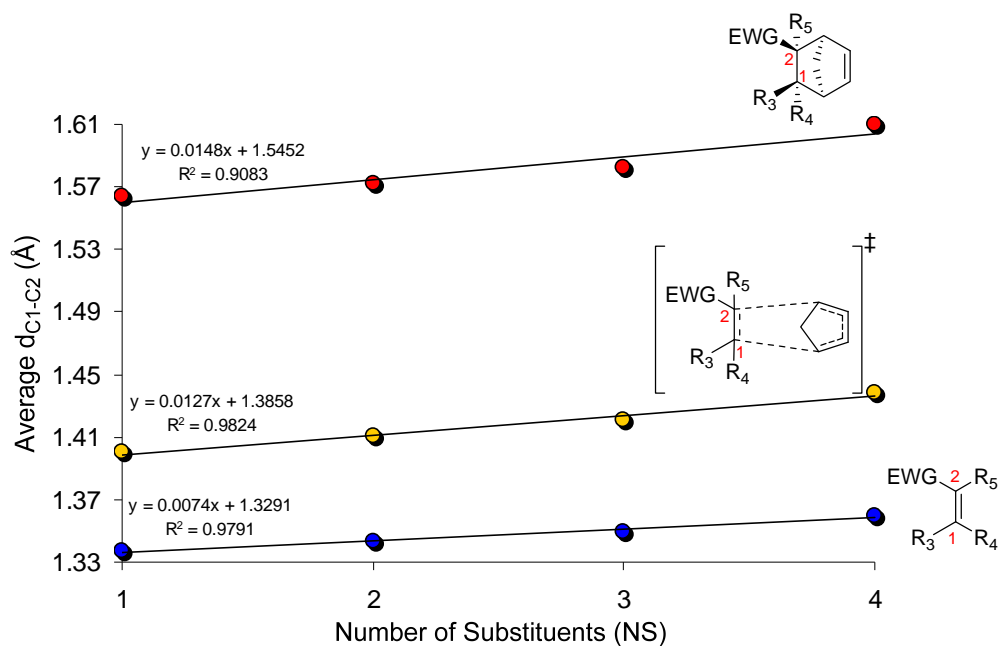

**Figure S14.** Plots of the averaged C1-C2 distance ( $d_{C1C2}$ ) versus the number of substituents of the dienophile (NS) for the dienophile reagents (in blue), the transition structures (in yellow) and the Diels-Alder products (in red), corresponding for the reactions between **1-70** and **CP**.

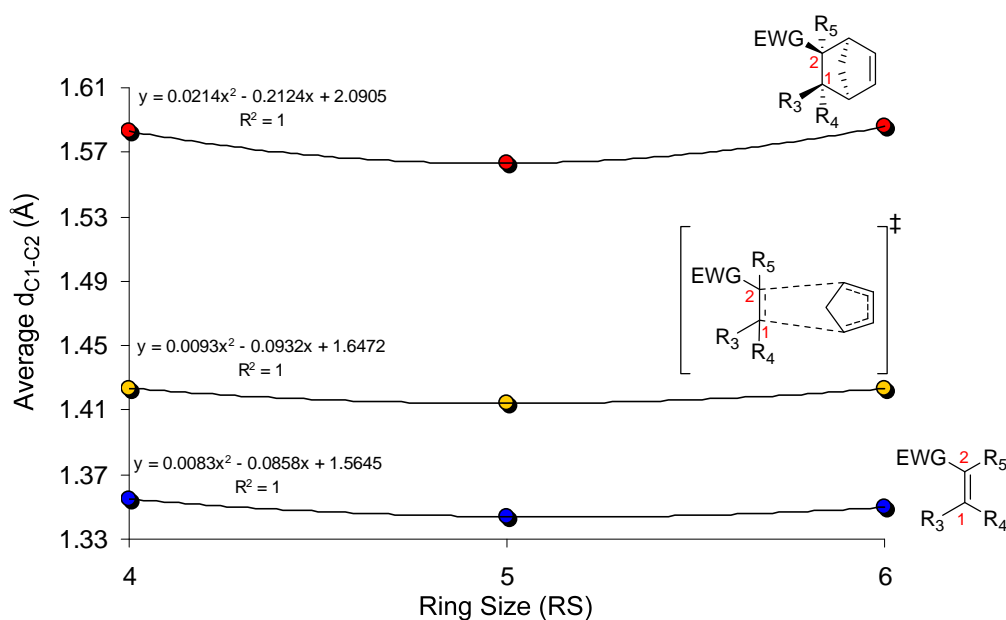

**Figure S15.** Plots of the averaged C1-C2 distance ( $d_{C1C2}$ ) versus the ring size of the dienophile (RS) for the dienophile reagents (in blue), the transition structures (in yellow) and the Diels-Alder products (in red), corresponding for the reactions between **41-70** and **CP**.

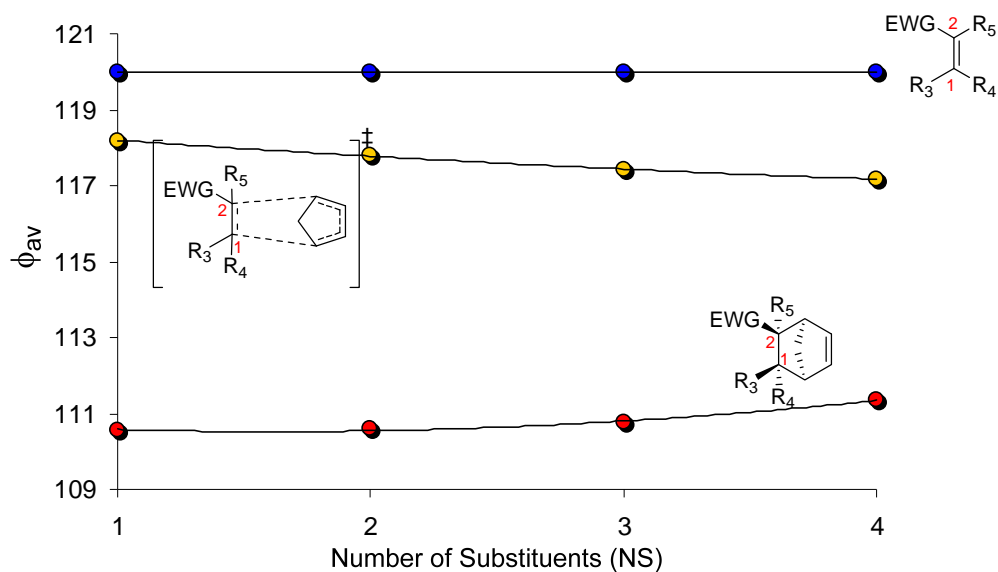

**Figure S16.** Plots of the average bending angles ( $\phi_{av}$ ) versus the number of substituents of the dienophile (NS) for the dienophile reagents (in blue), the transition structures (in yellow) and the Diels-Alder products (in red), corresponding for the reactions between **1-70** and **CP**.

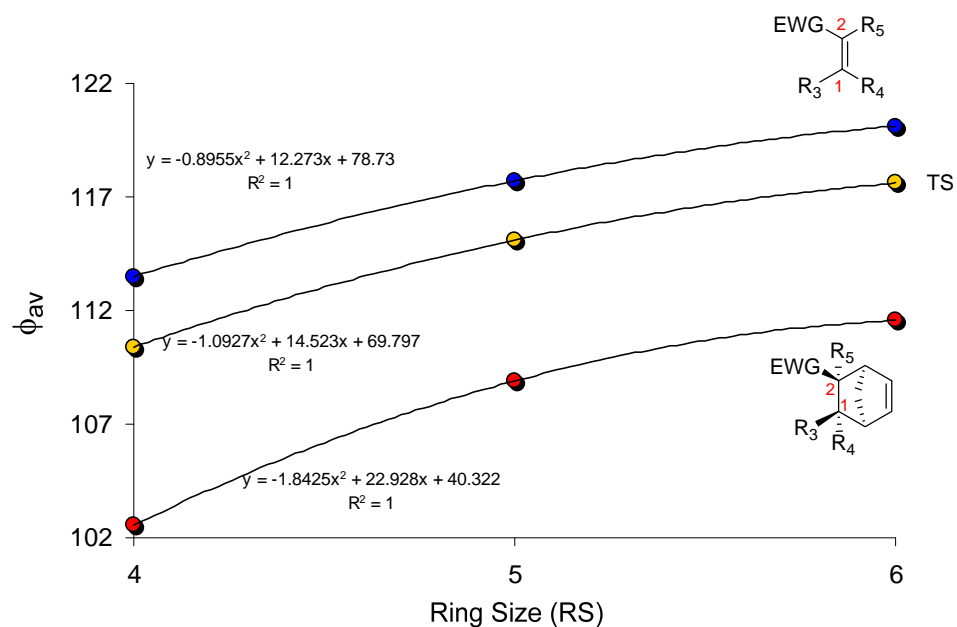

**Figure S17.** Plots of the average bending angles ( $\phi_{av}$ ) versus the ring size of the dienophile (RS) for the dienophile reagents (in blue), the transition structures (in yellow) and the Diels-Alder products (in red), corresponding for the reactions between **41-70** and **CP**.

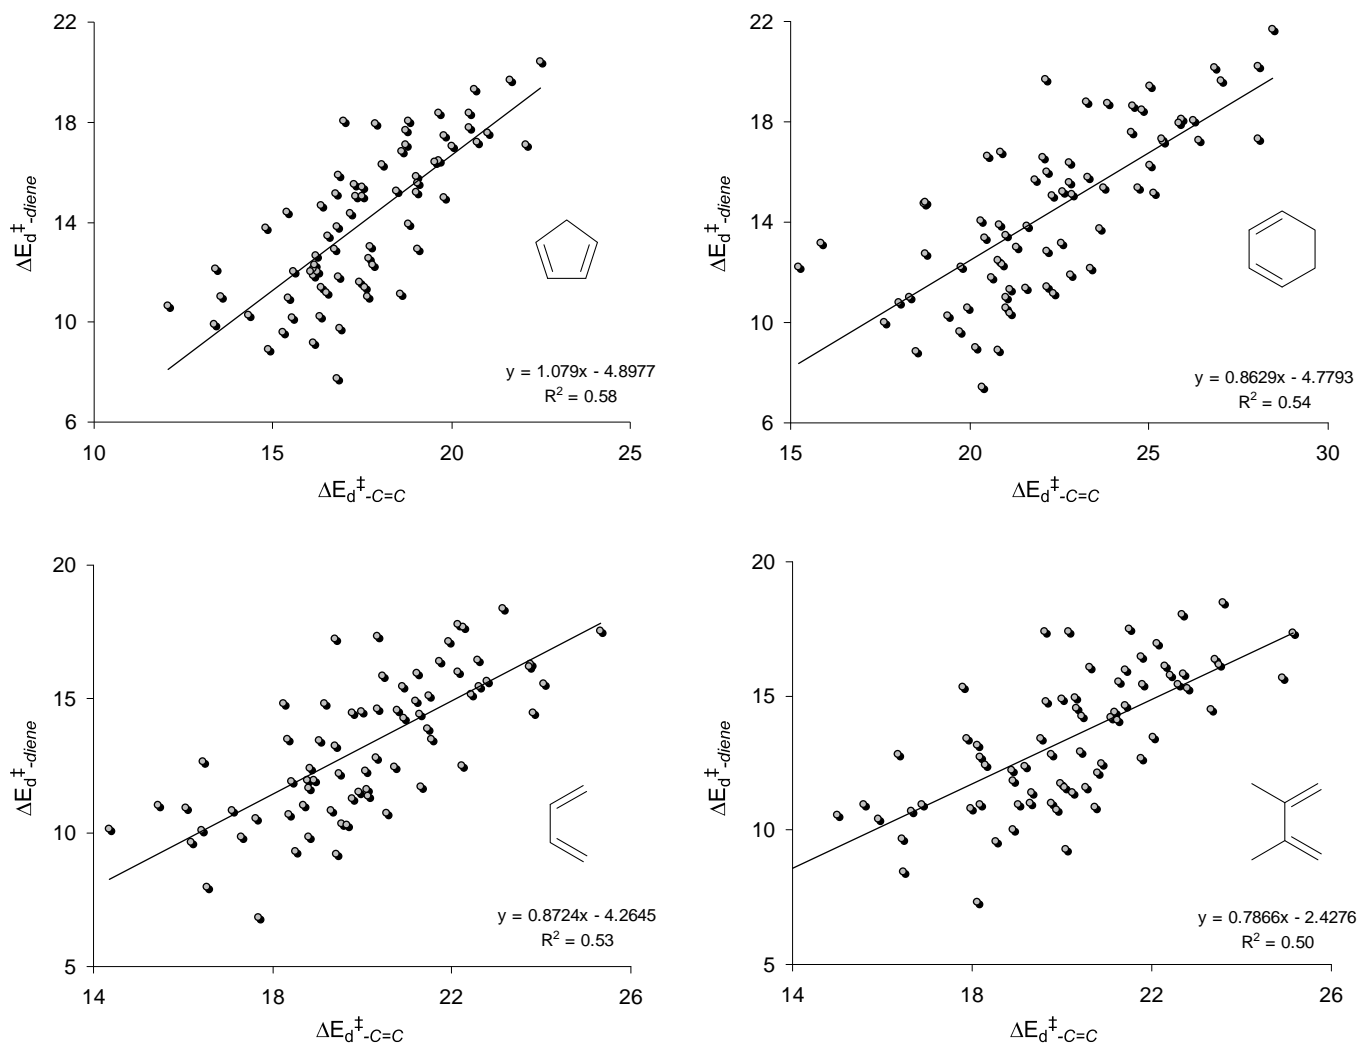

**Figure S18.** Plots of  $\Delta E_{d^{\ddagger}}^{\ddagger}\text{-diene}$  versus  $\Delta E_{d^{\ddagger}}^{\ddagger}\text{-C=C}$  corresponding to the reactions between **1-70** and the four dienes under study.

**Table S46.** Results obtained by applying ANOVA of the selected most significant factors of the diene distortion energy ( $\Delta E_{d^{\ddagger}-C=C}$ ) and coefficient values of Equation 5.

$$\Delta E_{d^{\ddagger}-diene} = a \cdot \Delta d_{C_3C_6} + b \cdot \chi_{C_6} + c \cdot \chi_{C_3} + d \cdot \chi_{C_6}^2 + e \cdot \chi_{C_3}^2 + f$$

| Source                            | Coefficient Value | Sum of Squares | Mean Square | F value   | Prob. > F | Significant |
|-----------------------------------|-------------------|----------------|-------------|-----------|-----------|-------------|
| <b>cyclopentadiene</b>            |                   |                |             |           |           |             |
| $\Delta d_{C_3C_6}$               | $a = -217.685$    | 45.88610       | 45.88610    | 260.94924 | < 0.0001  | Yes         |
| $\chi_{C_6}$                      | $b = -0.285$      | 0.27930        | 0.27930     | 1.58833   | 0.2121    | No          |
| $\chi_{C_3}$                      | $c = -0.105$      | 0.33095        | 0.33095     | 1.88206   | 0.1749    | No          |
| $\chi_{C_6}^2$                    | $d = 0.012$       | 1.96658        | 1.96658     | 11.18372  | 0.0014    | Yes         |
| $\chi_{C_3}^2$                    | $e = 0.011$       | 4.77900        | 4.77900     | 27.17766  | < 0.0001  | yes         |
| -                                 | $f = 0.79$        | -              | -           | -         | -         | -           |
| <b>1,3-cyclohexadiene</b>         |                   |                |             |           |           |             |
| $\Delta d_{C_3C_6}$               | $a = -138.328$    | 100.23622      | 100.23622   | 289.32730 | < 0.0001  | yes         |
| $\chi_{C_6}$                      | $b = -0.629$      | 2.50709        | 2.50709     | 7.23661   | 0.0091    | Yes         |
| $\chi_{C_3}$                      | $c = -0.449$      | 8.24540        | 8.24540     | 23.79997  | < 0.0001  | Yes         |
| $\chi_{C_6}^2$                    | $d = 0.015$       | 6.93259        | 6.93259     | 20.01062  | < 0.0001  | Yes         |
| $\chi_{C_3}^2$                    | $e = 0.016$       | 20.99933       | 20.99933    | 60.61361  | < 0.0001  | yes         |
| -                                 | $f = 10.945$      | -              | -           | -         | -         | -           |
| <b>butadiene</b>                  |                   |                |             |           |           |             |
| $\Delta d_{C_3C_6}$               | $a = -54.766$     | 36.69622       | 36.69622    | 114.57877 | < 0.0001  | Yes         |
| $\chi_{C_6}$                      | $b = 0.00923$     | 0.05793        | 0.05793     | 0.18089   | 0.6720    | No          |
| $\chi_{C_3}$                      | $c = -0.138$      | 0.32853        | 0.32853     | 1.02578   | 0.3150    | No          |
| $\chi_{C_6}^2$                    | $d = 0.0063$      | 72.43945       | 72.43945    | 226.18200 | < 0.0001  | Yes         |
| $\chi_{C_3}^2$                    | $e = 0.013$       | 5.01638        | 5.01638     | 15.66294  | 0.0002    | yes         |
| -                                 | $f = -0.211$      | -              | -           | -         | -         | -           |
| <b>2,3-dimethyl-1,3-butadiene</b> |                   |                |             |           |           |             |
| $\Delta d_{C_3C_6}$               | $a = -61.212$     | 32.92785       | 32.92785    | 166.17339 | < 0.0001  | yes         |
| $\chi_{C_6}$                      | $b = -0.14$       | 0.18140        | 0.18140     | 0.91546   | 0.3423    | No          |
| $\chi_{C_3}$                      | $c = -0.075$      | 0.29812        | 0.29812     | 1.50451   | 0.2245    | Yes         |
| $\chi_{C_6}^2$                    | $d = 0.008$       | 2.67525        | 2.67525     | 13.50090  | 0.0005    | Yes         |
| $\chi_{C_3}^2$                    | $e = 0.01$        | 7.58077        | 7.58077     | 38.25707  | < 0.0001  | yes         |
| -                                 | $f = 1.182$       | -              | -           | -         | -         | -           |

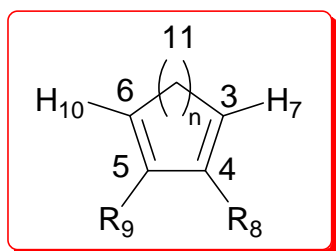

**Dihedral angles:**

$$\begin{aligned} \theta_1 &= \angle R_9-C_5-C_6-H_{10} \\ \theta_2 &= \angle C_4-C_5-C_6-R_{11} \\ \theta_3 &= \angle C_4-C_5-C_6-H_{10} \\ \theta_4 &= \angle R_9-C_5-C_6-R_{11} \\ \theta_5 &= \angle R_5-C_4-C_3-R_{11} \\ \theta_6 &= \angle H_7-C_3-C_4-R_8 \\ \theta_7 &= \angle R_{11}-C_3-C_4-R_8 \\ \theta_8 &= \angle H_7-C_3-C_4-C_5 \end{aligned}$$

**Out-of-plane deformations:**

$$\begin{aligned} \tau_{56} &= (\theta_1 + \theta_2) / 2 \\ \tau_{34} &= (\theta_5 + \theta_6) / 2 \\ \chi_{C_6} &= \theta_2 - \theta_3 + \pi(\text{mod } 2\pi) \\ \chi_{C_5} &= \theta_1 - \theta_3 + \pi(\text{mod } 2\pi) \\ \chi_{C_4} &= \theta_5 - \theta_7 + \pi(\text{mod } 2\pi) \\ \chi_{C_3} &= \theta_6 - \theta_7 + \pi(\text{mod } 2\pi) \end{aligned}$$

**Figure S19.** Definition of the dihedral angles and out-of-plane deformations for the strained dienes.

Table S47.  $\theta_{1-8}$  values for the diene fragments derived from the transition structures of CP.

| fragment from | $\theta_1$ | $\theta_2$ | $\theta_3$ | $\theta_4$ | $\theta_5$ | $\theta_6$ | $\theta_7$ | $\theta_8$ |
|---------------|------------|------------|------------|------------|------------|------------|------------|------------|
| TS-1+CP       | 21.1       | -19.9      | -167.4     | 168.6      | 15.1       | -9.1       | -171.3     | 177.3      |
| TS-2+CP       | 21.2       | -20.5      | -167.4     | 168.1      | 15.6       | -7.9       | -170.2     | 177.9      |
| TS-3+CP       | 23.7       | -20.0      | -164.2     | 167.9      | 12.4       | -3.2       | -172.0     | -178.8     |
| TS-4+CP       | 22.0       | -18.5      | -165.8     | 169.3      | 13.9       | -6.3       | -172.6     | -179.8     |
| TS-5+CP       | 16.8       | -18.8      | -171.1     | 169.2      | 17.6       | -13.5      | -170.2     | 174.3      |
| TS-6+CP       | 22.2       | -20.3      | -166.1     | 168.0      | 16.3       | -10.5      | -169.5     | 175.3      |
| TS-7+CP       | 23.5       | -19.5      | -164.4     | 168.4      | 14.3       | -6.4       | -171.2     | 179.0      |
| TS-8+CP       | 24.3       | -20.9      | -165.3     | 168.6      | 13.9       | -4.4       | -170.9     | -179.6     |
| TS-9+CP       | 23.6       | -21.6      | -166.2     | 168.2      | 15.6       | -7.1       | -169.9     | 178.4      |
| TS-10+CP      | 21.2       | -20.9      | -167.5     | 167.7      | 16.6       | -8.8       | -169.9     | 177.6      |
| TS-11+CP      | 13.8       | -18.7      | -173.2     | 168.3      | 19.0       | -14.1      | -168.0     | 172.9      |
| TS-12+CP      | 26.2       | -19.2      | -161.9     | 168.9      | 10.2       | -0.9       | -173.3     | -177.5     |
| TS-13+CP      | 25.9       | -20.7      | -163.0     | 168.1      | 12.6       | -3.0       | -171.9     | -178.5     |
| TS-14+CP      | 23.9       | -21.2      | -164.1     | 166.8      | 13.4       | -3.4       | -171.2     | -178.9     |
| TS-15+CP      | 19.8       | -20.5      | -167.8     | 167.0      | 16.1       | -6.9       | -169.4     | 178.6      |
| TS-16+CP      | 24.9       | -18.4      | -162.8     | 169.3      | 9.9        | -2.0       | -174.3     | -177.7     |
| TS-17+CP      | 14.9       | -18.2      | -173.1     | 169.7      | 18.2       | -14.9      | -169.7     | 173.1      |
| TS-18+CP      | 13.3       | -17.8      | -173.6     | 169.1      | 18.3       | -15.2      | -169.6     | 172.7      |
| TS-19+CP      | 20.8       | -20.3      | -167.6     | 168.2      | 16.2       | -10.3      | -171.0     | 177.0      |
| TS-20+CP      | 22.5       | -20.6      | -166.9     | 168.8      | 15.2       | -8.7       | -171.2     | 177.8      |
| TS-21+CP      | 18.1       | -19.7      | -169.8     | 168.1      | 16.4       | -8.8       | -169.4     | 176.9      |
| TS-22+CP      | 22.7       | -21.0      | -165.7     | 167.5      | 17.3       | -11.4      | -169.0     | 174.9      |
| TS-23+CP      | 24.4       | -20.3      | -163.7     | 167.8      | 15.4       | -7.2       | -170.7     | 178.9      |
| TS-24+CP      | 12.9       | -17.0      | -174.6     | 170.6      | 16.1       | -11.5      | -170.5     | 175.2      |
| TS-25+CP      | -20.1      | 19.7       | 168.1      | -168.5     | -16.2      | 8.6        | 170.4      | -178.1     |
| TS-26+CP      | 23.5       | -19.5      | -165.2     | 169.2      | 12.8       | -3.7       | -172.4     | -178.5     |
| TS-27+CP      | 21.7       | -21.2      | -167.4     | 167.9      | 16.1       | -9.4       | -170.6     | 177.3      |
| TS-28+CP      | 22.1       | -20.7      | -167.1     | 168.5      | 16.4       | -10.2      | -170.9     | 177.1      |
| TS-29+CP      | -16.5      | 19.0       | 171.5      | -169.0     | -18.3      | 12.2       | 168.4      | -174.5     |
| TS-30+CP      | 16.3       | -19.0      | -172.4     | 169.6      | 18.6       | -14.4      | -169.5     | 173.7      |
| TS-31+CP      | 20.1       | -21.8      | -168.3     | 166.6      | 17.6       | -9.8       | -168.9     | 176.7      |
| TS-32+CP      | -22.7      | 20.4       | 164.8      | -167.2     | -13.5      | 3.9        | 171.6      | 178.8      |
| TS-33+CP      | 13.6       | -18.7      | -173.9     | 168.9      | 18.7       | -13.6      | -168.9     | 173.9      |
| TS-34+CP      | -24.5      | 20.6       | 164.5      | -168.4     | -14.1      | 4.4        | 171.8      | 178.5      |
| TS-35+CP      | -23.2      | 21.9       | 164.3      | -165.6     | -15.7      | 5.5        | 170.3      | 179.5      |
| TS-36+CP      | 22.9       | -22.8      | -166.4     | 166.6      | 16.9       | -8.4       | -168.9     | 177.4      |
| TS-37+CP      | -17.7      | 21.5       | 169.4      | -165.7     | -19.0      | 11.0       | 168.1      | -176.1     |
| TS-38+CP      | -16.4      | 19.5       | 171.7      | -168.6     | -19.3      | 13.5       | 168.0      | -173.8     |
| TS-39+CP      | 15.9       | -19.4      | -172.8     | 169.4      | 19.4       | -15.9      | -169.4     | 172.8      |
| TS-40+CP      | 21.5       | -21.7      | -167.5     | 167.4      | 17.1       | -10.8      | -170.2     | 176.5      |
| TS-41+CP      | 19.4       | -20.8      | -167.9     | 166.5      | 14.8       | -8.8       | -170.6     | 176.5      |
| TS-42+CP      | 20.8       | -22.2      | -167.3     | 165.8      | 14.7       | -8.1       | -170.3     | 176.9      |
| TS-43+CP      | 19.3       | -21.1      | -168.0     | 166.2      | 16.0       | -10.2      | -170.2     | 176.1      |
| TS-44+CP      | -15.6      | 18.1       | 171.3      | -168.8     | -18.2      | 11.8       | 167.8      | -174.2     |
| TS-45+CP      | 22.0       | -21.8      | -165.6     | 165.8      | 12.7       | -4.0       | -171.4     | -179.9     |
| TS-46+CP      | -14.9      | 18.3       | 171.7      | -168.4     | -19.6      | 13.2       | 167.1      | -173.5     |
| TS-47+CP      | 20.6       | -22.3      | -167.5     | 165.8      | 15.9       | -9.4       | -170.0     | 176.5      |
| TS-48+CP      | 20.9       | -21.4      | -167.0     | 166.5      | 16.7       | -9.2       | -169.5     | 177.1      |
| TS-49+CP      | 22.4       | -22.4      | -166.2     | 166.2      | 16.7       | -8.3       | -169.3     | 177.6      |
| TS-50+CP      | 20.6       | -21.9      | -167.3     | 166.0      | 18.1       | -10.3      | -168.9     | 176.7      |
| TS-51+CP      | -15.7      | 20.1       | 172.0      | -167.6     | -19.0      | 13.0       | 167.2      | -173.2     |
| TS-52+CP      | 23.3       | -21.9      | -165.0     | 166.4      | 15.6       | -5.2       | -169.9     | -179.8     |
| TS-53+CP      | -14.9      | 20.4       | 172.6      | -167.1     | -20.3      | 14.8       | 166.7      | -172.2     |
| TS-54+CP      | 22.3       | -22.7      | -166.3     | 165.9      | 18.0       | -9.5       | -168.7     | 177.2      |
| TS-55+CP      | -14.3      | 18.6       | 173.2      | -168.9     | -18.6      | 14.3       | 168.9      | -173.2     |
| TS-56+CP      | 19.3       | -20.3      | -168.4     | 167.4      | 16.8       | -10.8      | -170.3     | 176.3      |
| TS-57+CP      | 20.4       | -22.2      | -167.5     | 165.8      | 17.5       | -9.3       | -169.2     | 177.4      |
| TS-58+CP      | 21.7       | -23.6      | -166.8     | 164.9      | 17.7       | -8.3       | -168.6     | 178.0      |
| TS-59+CP      | 19.9       | -22.6      | -168.1     | 165.4      | 18.8       | -10.4      | -168.6     | 177.0      |
| TS-60+CP      | -16.1      | 20.8       | 172.1      | -167.4     | -19.4      | 12.4       | 166.9      | -173.9     |
| TS-61+CP      | 22.4       | -23.0      | -165.7     | 165.1      | 16.3       | -5.4       | -169.4     | -179.7     |
| TS-62+CP      | -16.4      | 21.2       | 171.6      | -166.8     | -20.7      | 12.9       | 166.1      | -173.8     |
| TS-63+CP      | 20.9       | -23.9      | -167.5     | 164.4      | 18.9       | -10.1      | -168.1     | 176.9      |
| TS-64+CP      | 21.5       | -20.8      | -167.0     | 167.7      | 15.9       | -8.3       | -170.7     | 178.3      |
| TS-65+CP      | 23.4       | -22.3      | -166.0     | 167.1      | 16.2       | -7.6       | -170.1     | 178.8      |
| TS-66+CP      | 21.7       | -21.8      | -166.9     | 166.9      | 17.7       | -9.7       | -170.0     | 178.0      |
| TS-67+CP      | -15.9      | 19.7       | 172.5      | -168.7     | -18.3      | 13.2       | 168.8      | -174.0     |
| TS-68+CP      | 24.3       | -21.4      | -164.5     | 167.3      | 14.4       | -4.1       | -171.2     | -178.5     |
| TS-69+CP      | -15.8      | 20.4       | 172.5      | -167.9     | -19.7      | 14.7       | 168.2      | -173.2     |
| TS-70+CP      | 23.4       | -22.8      | -165.9     | 166.5      | 17.7       | -9.0       | -169.5     | 178.3      |



**Table S48.**  $\Delta d_{C3C6}$ ,  $\tau_{56}$ ,  $\tau_{34}$ ,  $\chi_{C3}$ ,  $\chi_{C4}$ ,  $\chi_{C5}$  and  $\chi_{C6}$  values for the diene fragments derived from the transition structures of CP.

| <i>fragment from</i> | $\Delta d_{C3C6}$ | $\tau_{56}$ | $\tau_{34}$ | $\chi_{C3}$ | $\chi_{C4}$ | $\chi_{C5}$ | $\chi_{C6}$ |
|----------------------|-------------------|-------------|-------------|-------------|-------------|-------------|-------------|
| TS-1+CP              | -0.043            | 0.6         | 3.0         | 17.8        | 6.4         | 8.5         | 32.5        |
| TS-2+CP              | -0.044            | 0.4         | 3.9         | 17.7        | 5.8         | 8.6         | 33.1        |
| TS-3+CP              | -0.034            | 1.8         | 4.6         | 11.2        | 4.4         | 8.0         | 35.8        |
| TS-4+CP              | -0.037            | 1.8         | 3.8         | 13.7        | 6.5         | 7.8         | 32.8        |
| TS-5+CP              | -0.047            | 1.0         | 2.1         | 23.3        | 7.8         | 8.0         | 27.7        |
| TS-6+CP              | -0.039            | 0.9         | 2.9         | 21.0        | 5.8         | 8.3         | 34.2        |
| TS-7+CP              | -0.035            | 2.0         | 3.9         | 15.2        | 5.5         | 7.9         | 35.1        |
| TS-8+CP              | -0.043            | 1.7         | 4.8         | 13.5        | 4.8         | 9.5         | 35.7        |
| TS-9+CP              | -0.046            | 1.0         | 4.3         | 17.2        | 5.6         | 9.8         | 35.4        |
| TS-10+CP             | -0.049            | 0.1         | 3.9         | 19.0        | 6.5         | 8.6         | 33.5        |
| TS-11+CP             | -0.051            | 2.5         | 2.4         | 26.1        | 7.0         | 6.9         | 25.5        |
| TS-12+CP             | -0.029            | 3.5         | 4.6         | 7.7         | 3.5         | 8.2         | 37.3        |
| TS-13+CP             | -0.035            | 2.6         | 4.8         | 11.1        | 4.5         | 8.9         | 37.8        |
| TS-14+CP             | -0.040            | 1.4         | 5.0         | 12.3        | 4.6         | 8.0         | 37.1        |
| TS-15+CP             | -0.049            | 0.4         | 4.6         | 17.5        | 5.5         | 7.6         | 32.8        |
| TS-16+CP             | -0.030            | 3.2         | 4.0         | 7.7         | 4.2         | 7.7         | 35.5        |
| TS-17+CP             | -0.051            | 1.7         | 1.7         | 25.2        | 7.9         | 7.9         | 25.2        |
| TS-18+CP             | -0.051            | 2.3         | 1.5         | 25.6        | 7.9         | 6.9         | 24.3        |
| TS-19+CP             | -0.048            | 0.3         | 3.0         | 19.3        | 7.3         | 8.5         | 32.6        |
| TS-20+CP             | -0.046            | 1.0         | 3.3         | 17.4        | 6.5         | 9.4         | 33.6        |
| TS-21+CP             | -0.048            | 0.8         | 3.8         | 19.4        | 5.7         | 7.9         | 30.0        |
| TS-22+CP             | -0.044            | 0.9         | 3.0         | 22.4        | 6.4         | 8.4         | 35.2        |
| TS-23+CP             | -0.040            | 2.1         | 4.1         | 16.5        | 6.1         | 8.1         | 36.6        |
| TS-24+CP             | -0.048            | 2.0         | 2.3         | 21.0        | 6.6         | 7.5         | 22.3        |
| TS-25+CP             | -0.045            | 0.2         | 3.8         | 18.1        | 6.7         | 8.2         | 31.6        |
| TS-26+CP             | -0.043            | 2.0         | 4.5         | 11.3        | 5.2         | 8.7         | 34.3        |
| TS-27+CP             | -0.051            | 0.2         | 3.3         | 18.8        | 6.7         | 9.1         | 33.8        |
| TS-28+CP             | -0.050            | 0.7         | 3.1         | 19.3        | 7.3         | 9.2         | 33.6        |
| TS-29+CP             | -0.054            | 1.2         | 3.0         | 23.8        | 6.7         | 8.0         | 27.5        |
| TS-30+CP             | -0.055            | 1.4         | 2.1         | 24.9        | 8.0         | 8.7         | 26.6        |
| TS-31+CP             | -0.053            | 0.9         | 3.9         | 20.9        | 6.5         | 8.4         | 33.5        |
| TS-32+CP             | -0.041            | 1.2         | 4.8         | 12.3        | 5.1         | 7.5         | 35.6        |
| TS-33+CP             | -0.060            | 2.5         | 2.5         | 24.8        | 7.5         | 7.5         | 24.8        |
| TS-34+CP             | -0.047            | 2.0         | 4.8         | 12.6        | 5.9         | 9.0         | 36.1        |
| TS-35+CP             | -0.049            | 0.7         | 5.1         | 15.2        | 6.0         | 7.4         | 37.6        |
| TS-36+CP             | -0.052            | 0.1         | 4.3         | 19.6        | 5.8         | 9.3         | 36.4        |
| TS-37+CP             | -0.061            | 1.9         | 4.0         | 22.9        | 7.2         | 7.2         | 32.1        |
| TS-38+CP             | -0.058            | 1.6         | 2.9         | 25.5        | 7.3         | 8.1         | 27.8        |
| TS-39+CP             | -0.058            | 1.7         | 1.7         | 26.6        | 8.7         | 8.8         | 26.6        |
| TS-40+CP             | -0.054            | 0.1         | 3.2         | 20.6        | 7.3         | 9.1         | 34.2        |
| TS-41+CP             | -0.042            | 0.7         | 3.0         | 18.2        | 5.4         | 7.3         | 32.9        |
| TS-42+CP             | -0.045            | 0.7         | 3.3         | 17.8        | 5.0         | 8.0         | 34.9        |
| TS-43+CP             | -0.047            | 0.9         | 2.9         | 19.9        | 6.3         | 7.3         | 33.1        |
| TS-44+CP             | -0.047            | 1.3         | 3.2         | 24.0        | 5.9         | 6.9         | 26.7        |
| TS-45+CP             | -0.040            | 0.1         | 4.4         | 12.6        | 4.1         | 7.6         | 36.2        |
| TS-46+CP             | -0.051            | 1.7         | 3.2         | 26.1        | 6.8         | 6.6         | 26.5        |
| TS-47+CP             | -0.049            | 0.9         | 3.3         | 19.4        | 5.9         | 8.1         | 34.8        |
| TS-48+CP             | -0.047            | 0.3         | 3.8         | 19.6        | 6.2         | 7.9         | 34.4        |
| TS-49+CP             | -0.049            | 0.0         | 4.2         | 19.0        | 5.9         | 8.6         | 36.2        |
| TS-50+CP             | -0.052            | 0.6         | 3.9         | 21.4        | 7.0         | 7.9         | 34.6        |
| TS-51+CP             | -0.053            | 2.2         | 3.0         | 25.8        | 6.2         | 7.7         | 28.2        |
| TS-52+CP             | -0.047            | 0.7         | 5.2         | 15.3        | 5.4         | 8.4         | 36.9        |
| TS-53+CP             | -0.058            | 2.8         | 2.7         | 28.1        | 7.0         | 7.5         | 27.8        |
| TS-54+CP             | -0.054            | 0.2         | 4.3         | 20.8        | 6.7         | 8.6         | 36.4        |
| TS-55+CP             | -0.050            | 2.1         | 2.1         | 25.4        | 7.5         | 7.5         | 25.4        |
| TS-56+CP             | -0.048            | 0.5         | 3.0         | 20.5        | 7.1         | 7.7         | 32.0        |
| TS-57+CP             | -0.050            | 0.9         | 4.1         | 20.1        | 6.7         | 8.0         | 34.6        |
| TS-58+CP             | -0.054            | 0.9         | 4.7         | 19.7        | 6.3         | 8.5         | 36.9        |
| TS-59+CP             | -0.055            | 1.3         | 4.2         | 21.8        | 7.4         | 8.0         | 34.5        |
| TS-60+CP             | -0.056            | 2.3         | 3.5         | 25.5        | 6.3         | 8.2         | 28.7        |
| TS-61+CP             | -0.051            | 0.3         | 5.5         | 16.0        | 5.7         | 8.1         | 37.3        |
| TS-62+CP             | -0.061            | 2.4         | 3.9         | 26.8        | 6.8         | 8.0         | 29.6        |
| TS-63+CP             | -0.058            | 1.5         | 4.4         | 22.0        | 7.0         | 8.3         | 36.4        |
| TS-64+CP             | -0.046            | 0.3         | 3.8         | 17.6        | 6.6         | 8.5         | 33.7        |
| TS-65+CP             | -0.049            | 0.5         | 4.3         | 17.4        | 6.4         | 9.4         | 36.2        |
| TS-66+CP             | -0.051            | 0.0         | 4.0         | 19.7        | 7.7         | 8.6         | 34.9        |
| TS-67+CP             | -0.053            | 1.9         | 2.6         | 24.4        | 7.1         | 8.4         | 27.2        |
| TS-68+CP             | -0.045            | 1.4         | 5.2         | 12.9        | 5.6         | 8.8         | 37.0        |
| TS-69+CP             | -0.059            | 2.3         | 2.5         | 26.5        | 7.9         | 8.3         | 27.9        |
| TS-70+CP             | -0.053            | 0.3         | 4.4         | 19.5        | 7.2         | 9.3         | 36.9        |

Table S49.  $\theta_{1-8}$  values for the diene fragments derived from the transition structures of CH.

| fragment from | $\theta_1$ | $\theta_2$ | $\theta_3$ | $\theta_4$ | $\theta_5$ | $\theta_6$ | $\theta_7$ | $\theta_8$ |
|---------------|------------|------------|------------|------------|------------|------------|------------|------------|
| TS-1+CH       | 11.1       | -37.8      | 175.5      | 157.8      | 30.4       | -2.0       | -163.0     | -168.6     |
| TS-2+CH       | 11.4       | -37.9      | 175.3      | 158.2      | 30.9       | -0.3       | -161.5     | -168.0     |
| TS-3+CH       | 15.2       | -36.7      | -179.9     | 158.4      | 24.6       | 2.4        | -165.3     | -167.7     |
| TS-4+CH       | 12.3       | -36.1      | 178.0      | 158.3      | 27.8       | -0.6       | -166.1     | -166.7     |
| TS-5+CH       | 7.7        | -36.0      | 172.6      | 159.1      | 34.0       | -5.1       | -161.0     | -170.0     |
| TS-6+CH       | 12.1       | -36.9      | 177.0      | 158.3      | 31.0       | -4.2       | -160.1     | -173.0     |
| TS-7+CH       | 14.0       | -36.0      | 179.2      | 158.8      | 27.8       | -1.3       | -163.3     | -170.2     |
| TS-8+CH       | 15.7       | -39.0      | 179.4      | 157.3      | 25.2       | 2.0        | -164.2     | -168.5     |
| TS-9+CH       | 13.4       | -40.0      | 176.5      | 156.9      | 29.9       | 0.4        | -161.5     | -168.3     |
| TS-10+CH      | 15.7       | -37.6      | -177.6     | 155.6      | 28.4       | -1.2       | -165.4     | -167.4     |
| TS-11+CH      | -4.3       | 36.6       | -170.4     | -157.4     | -35.7      | 4.6        | 158.0      | 170.9      |
| TS-12+CH      | 18.7       | -34.7      | -174.7     | 158.6      | 16.8       | 3.6        | -170.5     | -169.0     |
| TS-13+CH      | 17.1       | -37.9      | -178.1     | 157.4      | 23.1       | 2.6        | -166.3     | -168.0     |
| TS-14+CH      | 16.7       | -38.4      | -178.5     | 156.8      | 26.2       | 3.0        | -164.1     | -166.7     |
| TS-15+CH      | 10.0       | -38.2      | 175.6      | 156.2      | 31.6       | 1.3        | -160.0     | -167.1     |
| TS-16+CH      | 19.0       | -34.5      | -174.2     | 158.7      | 15.9       | 2.1        | -171.7     | -170.3     |
| TS-17+CH      | 5.6        | -35.4      | 170.8      | 159.4      | 35.4       | -5.6       | -159.4     | -170.8     |
| TS-18+CH      | 7.0        | -36.0      | 171.5      | 159.4      | 34.0       | -3.6       | -158.8     | -170.8     |
| TS-19+CH      | 10.3       | -38.4      | 175.3      | 156.6      | 33.1       | -2.8       | -161.7     | -168.0     |
| TS-20+CH      | 12.9       | -39.3      | 176.2      | 157.4      | 29.8       | -1.0       | -162.6     | -168.6     |
| TS-21+CH      | 7.8        | -37.7      | 173.3      | 156.7      | 33.3       | -1.5       | -160.5     | -167.7     |
| TS-22+CH      | 12.9       | -38.3      | 177.8      | 156.8      | 32.8       | -4.9       | -158.6     | -173.5     |
| TS-23+CH      | 14.9       | -37.4      | -179.9     | 157.4      | 29.7       | -1.6       | -161.9     | -170.0     |
| TS-24+CH      | -4.9       | 33.9       | -169.8     | -161.2     | -32.3      | 2.9        | 160.8      | 169.8      |
| TS-25+CH      | -9.8       | 37.3       | -175.0     | -157.5     | -32.4      | 1.8        | 161.3      | 168.1      |
| TS-26+CH      | 16.3       | -37.1      | -178.5     | 157.7      | 22.7       | 2.5        | -166.7     | -168.1     |
| TS-27+CH      | 12.2       | -40.1      | 175.5      | 156.6      | 31.3       | -0.8       | -160.8     | -168.7     |
| TS-28+CH      | 12.2       | -39.9      | 175.9      | 156.4      | 32.7       | -1.8       | -160.9     | -168.2     |
| TS-29+CH      | 7.1        | -37.4      | 172.2      | 157.5      | 34.8       | -2.9       | -158.1     | -170.0     |
| TS-30+CH      | 7.4        | -37.6      | 171.2      | 158.6      | 35.3       | -4.2       | -158.6     | -170.3     |
| TS-31+CH      | 12.2       | -39.8      | 177.8      | 154.6      | 32.8       | -2.7       | -161.4     | -168.6     |
| TS-32+CH      | -14.4      | 38.7       | 179.7      | -155.4     | -24.9      | -2.5       | 165.2      | 167.4      |
| TS-33+CH      | 3.6        | -36.7      | 170.1      | 156.8      | 36.7       | -3.6       | -156.8     | -170.1     |
| TS-34+CH      | 16.1       | -39.6      | -178.8     | 155.2      | 26.6       | 2.8        | -164.6     | -166.0     |
| TS-35+CH      | -12.0      | 41.3       | -178.9     | -151.8     | -31.3      | -1.9       | 161.0      | 165.7      |
| TS-36+CH      | 12.9       | -42.7      | 176.4      | 153.7      | 33.2       | 0.6        | -158.0     | -168.3     |
| TS-37+CH      | 3.7        | -38.8      | 169.6      | 155.3      | 39.0       | -3.8       | -152.9     | -171.9     |
| TS-38+CH      | 5.8        | -38.0      | 171.9      | 155.9      | 37.5       | -4.1       | -156.8     | -169.7     |
| TS-39+CH      | 6.0        | -38.1      | 170.7      | 157.2      | 38.1       | -6.0       | -157.2     | -170.7     |
| TS-40+CH      | 11.0       | -41.5      | 174.7      | 154.8      | 34.6       | -1.6       | -158.5     | -168.5     |
| TS-41+CH      | 9.2        | -37.3      | 174.2      | 157.8      | 31.0       | -1.6       | -160.9     | -169.7     |
| TS-42+CH      | 11.1       | -40.3      | 175.1      | 155.7      | 29.6       | -0.3       | -161.0     | -169.8     |
| TS-43+CH      | 9.2        | -38.5      | 174.3      | 156.5      | 33.9       | -1.7       | -159.2     | -168.7     |
| TS-44+CH      | -5.7       | 36.1       | -172.2     | -157.4     | -34.0      | 2.9        | 159.1      | 169.8      |
| TS-45+CH      | 13.7       | -39.1      | 179.3      | 155.2      | 23.4       | 1.6        | -164.8     | -170.2     |
| TS-46+CH      | 4.7        | -37.7      | 170.1      | 157.0      | 35.8       | -3.7       | -156.4     | -171.5     |
| TS-47+CH      | 11.2       | -41.2      | 175.3      | 154.7      | 32.4       | -0.4       | -159.3     | -168.7     |
| TS-48+CH      | 9.8        | -38.9      | 174.6      | 156.3      | 4.4        | 2.2        | 169.3      | -162.6     |
| TS-49+CH      | 11.9       | -41.3      | 175.8      | 154.8      | 32.5       | 0.5        | -158.9     | -168.0     |
| TS-50+CH      | 8.9        | -40.5      | 174.5      | 153.9      | 36.6       | -1.5       | -158.2     | -166.6     |
| TS-51+CH      | -5.3       | 38.9       | -170.6     | -155.8     | -35.6      | 2.8        | 157.1      | 170.1      |
| TS-52+CH      | 14.3       | -40.8      | 179.0      | 154.5      | 27.8       | 2.4        | -161.7     | -168.0     |
| TS-53+CH      | 5.2        | -39.3      | 170.9      | 155.0      | 38.7       | -2.7       | -154.2     | -169.7     |
| TS-54+CH      | 11.9       | -42.7      | 176.2      | 153.0      | 35.4       | 0.9        | -156.8     | -166.9     |
| TS-55+CH      | 4.5        | -35.3      | 170.0      | 159.2      | 35.3       | -4.5       | -159.2     | -170.0     |
| TS-56+CH      | 8.7        | -37.6      | 173.5      | 157.6      | 33.5       | -2.1       | -160.2     | -168.4     |
| TS-57+CH      | 10.1       | -39.9      | 174.4      | 155.8      | 34.6       | -0.3       | -158.7     | -167.0     |
| TS-58+CH      | 11.8       | -42.9      | 175.5      | 153.4      | 33.3       | 0.9        | -158.5     | -167.4     |
| TS-59+CH      | 8.3        | -41.4      | 173.8      | 153.2      | 37.7       | -1.4       | -157.2     | -166.5     |
| TS-60+CH      | -5.4       | 39.8       | -170.4     | -155.3     | -36.9      | 2.7        | 155.9      | 169.8      |
| TS-61+CH      | 14.3       | -42.5      | 178.8      | 153.0      | 28.8       | 3.0        | -161.0     | -167.2     |
| TS-62+CH      | 4.8        | -40.6      | 170.3      | 153.8      | 39.7       | -3.0       | -153.5     | -169.8     |
| TS-63+CH      | 12.2       | -44.2      | 176.3      | 151.7      | 35.9       | 1.2        | -156.5     | -166.5     |
| TS-64+CH      | 11.4       | -38.5      | 175.1      | 157.7      | 32.1       | -0.8       | -161.6     | -167.1     |
| TS-65+CH      | 13.9       | -41.2      | 176.9      | 155.8      | 30.8       | 0.3        | -161.4     | -167.4     |
| TS-66+CH      | 10.4       | -40.6      | 175.1      | 154.8      | 36.0       | -1.7       | -159.7     | -166.0     |
| TS-67+CH      | -6.4       | 38.1       | -170.6     | -157.6     | -34.9      | 3.8        | 158.7      | 170.2      |
| TS-68+CH      | 17.3       | -40.2      | -177.7     | 154.8      | 23.8       | 2.2        | -165.5     | -168.6     |
| TS-69+CH      | 6.6        | -39.3      | 171.0      | 156.2      | 38.3       | -3.7       | -155.9     | -169.5     |
| TS-70+CH      | 14.6       | -43.5      | 178.0      | 153.1      | 34.1       | 0.7        | -159.1     | -166.1     |

**Table S50.**  $\Delta d_{C3C6}$ ,  $\tau_{56}$ ,  $\tau_{34}$ ,  $\chi_{C3}$ ,  $\chi_{C4}$ ,  $\chi_{C5}$  and  $\chi_{C6}$  values for the diene fragments derived from the transition structures of **CH**.

| <i>fragment from</i> | $\Delta d_{C3C6}$ | $\tau_{56}$ | $\tau_{34}$ | $\chi_{C3}$ | $\chi_{C4}$ | $\chi_{C5}$ | $\chi_{C6}$ |
|----------------------|-------------------|-------------|-------------|-------------|-------------|-------------|-------------|
| TS-1+CH              | -0.114            | 13.4        | 14.2        | 19.0        | 13.4        | 15.6        | 33.3        |
| TS-2+CH              | -0.113            | 13.3        | 15.3        | 18.9        | 12.4        | 16.1        | 33.2        |
| TS-3+CH              | -0.084            | 10.7        | 13.5        | 12.3        | 9.9         | 15.1        | 36.8        |
| TS-4+CH              | -0.104            | 11.9        | 13.6        | 14.5        | 13.9        | 14.3        | 34.1        |
| TS-5+CH              | -0.122            | 14.2        | 14.5        | 24.1        | 15.0        | 15.1        | 28.6        |
| TS-6+CH              | -0.101            | 12.4        | 13.4        | 24.1        | 11.2        | 15.1        | 33.8        |
| TS-7+CH              | -0.092            | 11.0        | 13.3        | 18.0        | 11.2        | 14.8        | 35.2        |
| TS-8+CH              | -0.095            | 11.7        | 13.6        | 13.7        | 9.5         | 16.3        | 38.4        |
| TS-9+CH              | -0.113            | 13.3        | 15.1        | 18.2        | 11.4        | 17.0        | 36.5        |
| TS-10+CH             | -0.105            | 11.0        | 13.6        | 15.8        | 13.8        | 13.3        | 40.0        |
| TS-11+CH             | -0.127            | 16.1        | 15.5        | 26.5        | 13.7        | 13.9        | 27.0        |
| TS-12+CH             | -0.051            | 8.0         | 10.2        | 5.8         | 7.4         | 13.4        | 40.1        |
| TS-13+CH             | -0.078            | 10.4        | 12.9        | 11.1        | 9.4         | 15.2        | 39.8        |
| TS-14+CH             | -0.091            | 10.8        | 14.6        | 12.9        | 10.3        | 15.2        | 39.9        |
| TS-15+CH             | -0.118            | 14.1        | 16.5        | 18.7        | 11.6        | 14.4        | 33.8        |
| TS-16+CH             | -0.057            | 7.7         | 9.0         | 6.2         | 7.6         | 13.2        | 40.3        |
| TS-17+CH             | -0.126            | 14.9        | 14.9        | 26.2        | 14.8        | 14.8        | 26.2        |
| TS-18+CH             | -0.123            | 14.5        | 15.2        | 24.8        | 12.8        | 15.4        | 27.6        |
| TS-19+CH             | -0.127            | 14.1        | 15.2        | 21.1        | 14.9        | 15.0        | 33.6        |
| TS-20+CH             | -0.116            | 13.2        | 14.4        | 18.3        | 12.4        | 16.7        | 35.5        |
| TS-21+CH             | -0.122            | 15.0        | 15.9        | 21.0        | 13.8        | 14.5        | 31.1        |
| TS-22+CH             | -0.110            | 12.7        | 13.9        | 26.3        | 11.4        | 15.1        | 36.1        |
| TS-23+CH             | -0.100            | 11.2        | 14.1        | 19.7        | 11.6        | 14.8        | 37.6        |
| TS-24+CH             | -0.111            | 14.5        | 14.7        | 22.1        | 13.1        | 15.1        | 23.7        |
| TS-25+CH             | -0.118            | 13.8        | 15.3        | 20.5        | 13.7        | 14.8        | 32.3        |
| TS-26+CH             | -0.086            | 10.4        | 12.6        | 10.8        | 9.4         | 14.8        | 38.6        |
| TS-27+CH             | -0.124            | 14.0        | 15.3        | 20.0        | 12.1        | 16.7        | 35.7        |
| TS-28+CH             | -0.127            | 13.8        | 15.5        | 20.9        | 13.6        | 16.3        | 35.7        |
| TS-29+CH             | -0.130            | 15.1        | 15.9        | 24.8        | 12.9        | 14.9        | 29.6        |
| TS-30+CH             | -0.133            | 15.1        | 15.6        | 25.6        | 13.9        | 16.2        | 28.8        |
| TS-31+CH             | -0.126            | 13.8        | 15.0        | 21.4        | 14.2        | 14.4        | 37.6        |
| TS-32+CH             | -0.095            | 12.2        | 13.7        | 12.3        | 10.1        | 14.0        | 39.0        |
| TS-33+CH             | -0.138            | 16.5        | 16.5        | 26.8        | 13.5        | 13.5        | 26.8        |
| TS-34+CH             | -0.104            | 11.8        | 14.7        | 12.6        | 11.2        | 14.9        | 40.9        |
| TS-35+CH             | -0.124            | 14.7        | 16.6        | 17.1        | 12.4        | 13.1        | 40.2        |
| TS-36+CH             | -0.130            | 14.9        | 16.9        | 21.5        | 11.2        | 16.5        | 39.1        |
| TS-37+CH             | -0.146            | 17.5        | 17.6        | 30.9        | 11.9        | 14.1        | 28.4        |
| TS-38+CH             | -0.141            | 16.1        | 16.7        | 27.2        | 14.3        | 13.9        | 30.0        |
| TS-39+CH             | -0.142            | 16.1        | 16.0        | 28.7        | 15.3        | 15.3        | 28.7        |
| TS-40+CH             | -0.137            | 15.2        | 16.5        | 23.1        | 13.1        | 16.3        | 36.2        |
| TS-41+CH             | -0.111            | 14.0        | 14.7        | 20.7        | 11.9        | 15.0        | 31.4        |
| TS-42+CH             | -0.113            | 14.6        | 14.6        | 19.4        | 10.6        | 16.0        | 35.4        |
| TS-43+CH             | -0.123            | 14.6        | 16.1        | 22.6        | 13.1        | 14.9        | 32.7        |
| TS-44+CH             | -0.119            | 15.2        | 15.6        | 23.8        | 13.1        | 13.5        | 28.3        |
| TS-45+CH             | -0.088            | 12.7        | 12.5        | 13.6        | 8.3         | 14.4        | 38.5        |
| TS-46+CH             | -0.129            | 16.5        | 16.1        | 27.3        | 12.3        | 14.6        | 27.7        |
| TS-47+CH             | -0.124            | 15.0        | 16.0        | 21.1        | 11.7        | 15.9        | 36.5        |
| TS-48+CH             | -0.123            | 14.6        | 3.3         | 13.0        | 15.1        | 15.2        | 33.5        |
| TS-49+CH             | -0.124            | 14.7        | 16.5        | 20.6        | 11.5        | 16.1        | 37.1        |
| TS-50+CH             | -0.137            | 15.8        | 17.6        | 23.2        | 14.9        | 14.4        | 35.0        |
| TS-51+CH             | -0.131            | 16.8        | 16.4        | 25.8        | 12.7        | 14.7        | 29.5        |
| TS-52+CH             | -0.103            | 13.3        | 15.1        | 15.8        | 9.5         | 15.3        | 39.9        |
| TS-53+CH             | -0.142            | 17.0        | 18.0        | 28.4        | 12.9        | 14.3        | 30.2        |
| TS-54+CH             | -0.134            | 15.4        | 18.2        | 22.4        | 12.2        | 15.7        | 39.0        |
| TS-55+CH             | -0.122            | 15.4        | 15.4        | 25.3        | 14.5        | 14.5        | 25.3        |
| TS-56+CH             | -0.122            | 14.5        | 15.7        | 21.9        | 13.7        | 15.2        | 31.1        |
| TS-57+CH             | -0.128            | 14.9        | 17.1        | 21.6        | 13.3        | 15.7        | 34.3        |
| TS-58+CH             | -0.129            | 15.5        | 17.1        | 20.6        | 11.8        | 16.3        | 38.4        |
| TS-59+CH             | -0.141            | 16.5        | 18.1        | 24.2        | 14.9        | 14.5        | 35.1        |
| TS-60+CH             | -0.137            | 17.2        | 17.1        | 26.7        | 12.9        | 15.1        | 30.2        |
| TS-61+CH             | -0.109            | 14.1        | 15.9        | 16.0        | 9.8         | 15.5        | 41.3        |
| TS-62+CH             | -0.149            | 17.9        | 18.3        | 29.6        | 13.2        | 14.4        | 30.9        |
| TS-63+CH             | -0.138            | 16.0        | 18.5        | 22.3        | 12.4        | 15.9        | 40.5        |
| TS-64+CH             | -0.119            | 13.6        | 15.7        | 19.2        | 13.7        | 16.2        | 33.6        |
| TS-65+CH             | -0.119            | 13.7        | 15.6        | 18.3        | 12.2        | 17.0        | 38.1        |
| TS-66+CH             | -0.136            | 15.1        | 17.1        | 22.0        | 15.7        | 15.4        | 35.6        |
| TS-67+CH             | -0.129            | 15.9        | 15.6        | 25.1        | 13.6        | 15.8        | 28.7        |
| TS-68+CH             | -0.088            | 11.4        | 13.0        | 12.3        | 9.2         | 15.0        | 42.5        |
| TS-69+CH             | -0.144            | 16.4        | 17.3        | 27.8        | 14.2        | 15.6        | 30.4        |
| TS-70+CH             | -0.130            | 14.4        | 17.4        | 20.2        | 13.2        | 16.6        | 41.5        |

Table S51.  $\theta_{1-8}$  values for the diene fragments derived from the transition structures of BU.

| fragment from | $\theta_1$ | $\theta_2$ | $\theta_3$ | $\theta_4$ | $\theta_5$ | $\theta_6$ | $\theta_7$ | $\theta_8$ |
|---------------|------------|------------|------------|------------|------------|------------|------------|------------|
| TS-1+BU       | 10.2       | -36.4      | 175.8      | 158.0      | 26.2       | -2.5       | -165.7     | -170.5     |
| TS-2+BU       | 10.8       | -36.5      | 176.0      | 158.3      | 25.5       | -0.8       | -165.6     | -169.6     |
| TS-3+BU       | 13.3       | -35.5      | 179.6      | 158.2      | 19.2       | 1.6        | -170.0     | -169.2     |
| TS-4+BU       | 10.6       | -34.9      | 177.0      | 158.7      | 24.0       | -1.8       | -168.3     | -169.6     |
| TS-5+BU       | 7.2        | -33.4      | 173.3      | 160.5      | 30.2       | -5.5       | -163.2     | -172.0     |
| TS-6+BU       | 10.7       | -35.1      | 177.3      | 158.3      | 24.8       | -5.2       | -165.6     | -174.8     |
| TS-7+BU       | 12.1       | -34.5      | 179.0      | 158.6      | 21.8       | -2.6       | -168.4     | -172.4     |
| TS-8+BU       | 12.9       | -36.8      | 179.0      | 157.1      | 19.7       | 1.0        | -168.9     | -170.4     |
| TS-9+BU       | 12.1       | -37.6      | 177.3      | 157.2      | 23.1       | 0.0        | -166.8     | -170.1     |
| TS-10+BU      | 9.9        | -37.1      | 175.3      | 157.5      | 28.6       | -1.4       | -163.7     | -169.2     |
| TS-11+BU      | -5.0       | 33.4       | -172.0     | -159.6     | -33.2      | 4.5        | 159.8      | 171.5      |
| TS-12+BU      | 13.3       | -33.2      | -178.6     | 158.8      | 15.2       | 2.0        | -172.1     | -170.7     |
| TS-13+BU      | 13.4       | -35.5      | -179.9     | 157.8      | 18.3       | 1.7        | -170.3     | -169.8     |
| TS-14+BU      | 14.1       | -37.0      | -179.8     | 156.9      | 21.2       | 1.9        | -168.6     | -168.2     |
| TS-15+BU      | 9.0        | -36.9      | 175.5      | 156.7      | 27.1       | -0.2       | -164.0     | -169.1     |
| TS-16+BU      | 15.1       | -34.0      | -177.4     | 158.5      | 15.7       | 1.3        | -172.2     | -170.9     |
| TS-17+BU      | 5.7        | -32.8      | 171.9      | 161.0      | 32.8       | -5.7       | -161.0     | -171.9     |
| TS-18+BU      | -7.4       | 33.2       | -173.1     | -161.0     | -32.3      | 3.6        | 160.2      | 171.1      |
| TS-19+BU      | 9.1        | -37.0      | 175.0      | 157.1      | 29.0       | -3.5       | -164.2     | -170.4     |
| TS-20+BU      | 11.6       | -37.4      | 176.7      | 157.5      | 24.6       | -1.2       | -166.4     | -170.2     |
| TS-21+BU      | 6.9        | -34.5      | 173.5      | 159.0      | 28.4       | -2.3       | -163.5     | -170.4     |
| TS-22+BU      | 11.1       | -36.6      | 177.6      | 156.8      | 26.9       | -5.7       | -164.2     | -174.6     |
| TS-23+BU      | 12.6       | -36.1      | 179.4      | 157.0      | 23.8       | -2.8       | -167.2     | -171.8     |
| TS-24+BU      | 5.3        | -28.7      | 172.1      | 164.5      | 28.6       | -3.1       | -163.1     | -171.4     |
| TS-25+BU      | -9.5       | 35.3       | -175.8     | -158.4     | -27.4      | 2.7        | 164.8      | 170.6      |
| TS-26+BU      | 13.6       | -35.9      | 179.5      | 158.3      | 22.0       | 1.5        | -167.7     | -168.8     |
| TS-27+BU      | 11.7       | -37.8      | 176.6      | 157.4      | 27.2       | -0.7       | -163.8     | -169.6     |
| TS-28+BU      | 10.8       | -37.8      | 176.3      | 156.8      | 27.3       | -2.3       | -164.8     | -170.1     |
| TS-29+BU      | -7.0       | 34.7       | -173.1     | -159.1     | -31.6      | 4.0        | 160.9      | 171.6      |
| TS-30+BU      | 7.2        | -34.8      | 172.5      | 159.9      | 32.2       | -4.2       | -160.9     | -171.1     |
| TS-31+BU      | 10.1       | -36.8      | 175.5      | 157.8      | 30.0       | -1.3       | -161.9     | -169.4     |
| TS-32+BU      | -11.8      | 37.1       | -178.7     | -156.0     | -23.1      | -0.8       | 167.1      | 169.1      |
| TS-33+BU      | 4.3        | -33.8      | 171.1      | 159.4      | 33.8       | -4.3       | -159.4     | -171.1     |
| TS-34+BU      | 13.0       | -37.1      | 178.8      | 157.1      | 25.3       | 1.1        | -165.8     | -167.8     |
| TS-35+BU      | -10.4      | 38.4       | -177.7     | -154.3     | -28.3      | 0.3        | 163.7      | 168.3      |
| TS-36+BU      | 12.5       | -39.3      | 177.5      | 155.7      | 27.0       | 0.2        | -163.2     | -169.6     |
| TS-37+BU      | 5.8        | -36.7      | 171.8      | 157.3      | 34.1       | -3.5       | -157.5     | -171.9     |
| TS-38+BU      | 5.5        | -34.0      | 171.9      | 159.7      | 34.5       | -5.0       | -158.3     | -172.2     |
| TS-39+BU      | 6.0        | -34.1      | 171.9      | 160.0      | 34.1       | -6.0       | -160.0     | -171.9     |
| TS-40+BU      | 11.5       | -37.8      | 176.7      | 157.1      | 29.0       | -1.1       | -162.6     | -169.5     |
| TS-41+BU      | 9.7        | -35.2      | 175.5      | 159.0      | 26.2       | -0.9       | -164.7     | -169.9     |
| TS-42+BU      | 11.1       | -37.5      | 176.7      | 156.9      | 23.9       | 0.1        | -166.1     | -169.9     |
| TS-43+BU      | 9.3        | -35.1      | 175.3      | 158.9      | 29.6       | -1.6       | -162.7     | -169.3     |
| TS-44+BU      | -4.6       | 33.2       | -171.9     | -159.5     | -30.6      | 4.4        | 161.9      | 171.9      |
| TS-45+BU      | 12.0       | -36.6      | 178.7      | 156.7      | 19.5       | 1.2        | -169.2     | -170.1     |
| TS-46+BU      | 6.1        | -34.5      | 172.5      | 159.2      | 31.9       | -2.5       | -160.0     | -170.6     |
| TS-47+BU      | 11.3       | -37.7      | 176.9      | 156.8      | 26.7       | 0.0        | -164.3     | -169.0     |
| TS-48+BU      | 9.9        | -37.4      | 175.6      | 157.0      | 29.4       | -1.0       | -162.9     | -168.8     |
| TS-49+BU      | 11.9       | -39.5      | 177.4      | 155.0      | 26.1       | 0.5        | -164.3     | -169.1     |
| TS-50+BU      | 9.0        | -37.5      | 175.2      | 156.4      | 32.1       | -1.7       | -161.4     | -168.3     |
| TS-51+BU      | -5.2       | 36.1       | -171.3     | -157.9     | -32.6      | 4.1        | 159.8      | 171.7      |
| TS-52+BU      | 12.7       | -39.4      | 178.8      | 154.5      | 23.1       | 1.5        | -166.4     | -169.0     |
| TS-53+BU      | 6.4        | -36.6      | 172.8      | 156.9      | 34.4       | -2.7       | -158.2     | -170.1     |
| TS-54+BU      | 11.8       | -39.8      | 177.6      | 154.4      | 28.6       | 0.2        | -162.9     | -168.3     |
| TS-55+BU      | 4.4        | -32.6      | 170.7      | 161.1      | 32.5       | -4.4       | -161.2     | -170.7     |
| TS-56+BU      | 9.1        | -35.7      | 174.7      | 158.8      | 30.2       | -1.8       | -162.7     | -168.9     |
| TS-57+BU      | 11.0       | -38.3      | 176.2      | 156.5      | 30.0       | -0.4       | -162.4     | -168.0     |
| TS-58+BU      | 12.6       | -40.7      | 178.1      | 153.8      | 26.6       | 0.5        | -164.2     | -168.7     |
| TS-59+BU      | 9.5        | -38.4      | 175.2      | 155.9      | 33.1       | -1.4       | -160.5     | -167.8     |
| TS-60+BU      | -5.2       | 37.2       | -171.1     | -157.0     | -33.9      | 4.4        | 158.9      | 171.6      |
| TS-61+BU      | 13.7       | -40.4      | -179.8     | 153.1      | 22.9       | 1.5        | -166.6     | -168.9     |
| TS-62+BU      | 7.5        | -38.2      | 173.7      | 155.7      | 35.4       | -2.3       | -157.4     | -169.5     |
| TS-63+BU      | 13.1       | -41.2      | 178.7      | 153.2      | 29.0       | 0.7        | -162.4     | -167.9     |
| TS-64+BU      | 11.7       | -36.3      | 176.8      | 158.6      | 27.3       | -0.8       | -165.2     | -168.3     |
| TS-65+BU      | 13.4       | -38.4      | 178.6      | 156.4      | 24.1       | 0.1        | -166.8     | -169.0     |
| TS-66+BU      | 10.9       | -36.9      | 176.2      | 157.9      | 30.9       | -1.6       | -163.0     | -167.7     |
| TS-67+BU      | -5.5       | 35.0       | -171.0     | -159.4     | -31.9      | 5.3        | 161.4      | 172.1      |
| TS-68+BU      | 14.5       | -37.8      | -179.0     | 155.6      | 19.8       | 1.0        | -169.7     | -169.5     |
| TS-69+BU      | 8.1        | -36.3      | 173.6      | 158.2      | 33.8       | -3.3       | -159.7     | -169.8     |
| TS-70+BU      | 14.3       | -39.7      | 179.4      | 155.1      | 26.9       | 0.3        | -164.9     | -167.9     |

**Table S52.**  $\Delta d_{C3C6}$ ,  $\tau_{56}$ ,  $\tau_{34}$ ,  $\chi_{C3}$ ,  $\chi_{C4}$ ,  $\chi_{C5}$  and  $\chi_{C6}$  values for the diene fragments derived from the transition structures of BU.

| <i>fragment from</i> | $\Delta d_{C3C6}$ | $\tau_{56}$ | $\tau_{34}$ | $\chi_{C3}$ | $\chi_{C4}$ | $\chi_{C5}$ | $\chi_{C6}$ |
|----------------------|-------------------|-------------|-------------|-------------|-------------|-------------|-------------|
| TS-1+BU              | -0.209            | -13.1       | 11.9        | 16.8        | -12.0       | 14.4        | -32.2       |
| TS-2+BU              | -0.197            | -12.8       | 12.4        | 15.2        | -11.2       | 14.8        | -32.5       |
| TS-3+BU              | -0.154            | -11.1       | 10.4        | 8.4         | -9.2        | 13.7        | -35.1       |
| TS-4+BU              | -0.200            | -12.1       | 11.1        | 13.5        | -12.3       | 13.6        | -31.8       |
| TS-5+BU              | -0.218            | -13.1       | 12.4        | 22.3        | -13.5       | 13.9        | -26.7       |
| TS-6+BU              | -0.167            | -12.2       | 9.8         | 19.6        | -10.4       | 13.4        | -32.3       |
| TS-7+BU              | -0.163            | -11.2       | 9.6         | 14.2        | -10.2       | 13.1        | -33.4       |
| TS-8+BU              | -0.164            | -12.0       | 10.4        | 10.1        | -8.7        | 13.9        | -35.9       |
| TS-9+BU              | -0.187            | -12.8       | 11.5        | 13.3        | -9.9        | 14.8        | -35.0       |
| TS-10+BU             | -0.217            | -13.6       | 13.6        | 17.8        | -12.3       | 14.6        | -32.4       |
| TS-11+BU             | -0.222            | 14.2        | -14.3       | 24.7        | -13.0       | 13.1        | -25.4       |
| TS-12+BU             | -0.121            | -9.9        | 8.6         | 5.9         | -7.3        | -12.0       | 34.6        |
| TS-13+BU             | -0.141            | -11.0       | 10.0        | 8.0         | -8.5        | -13.3       | 35.6        |
| TS-14+BU             | -0.171            | -11.4       | 11.6        | 9.5         | -9.8        | -13.9       | 37.2        |
| TS-15+BU             | -0.205            | -13.9       | 13.4        | 16.2        | -11.1       | 13.6        | -32.3       |
| TS-16+BU             | -0.152            | -9.5        | 8.5         | 6.6         | -7.8        | -12.5       | 36.6        |
| TS-17+BU             | -0.228            | -13.6       | 13.6        | 24.7        | -13.8       | 13.8        | -24.7       |
| TS-18+BU             | -0.220            | 12.9        | -14.3       | 23.3        | -12.5       | 14.2        | -26.3       |
| TS-19+BU             | -0.226            | -13.9       | 12.7        | 19.4        | -13.1       | 14.1        | -32.0       |
| TS-20+BU             | -0.208            | -12.9       | 11.7        | 14.8        | -11.0       | 14.9        | -34.1       |
| TS-21+BU             | -0.212            | -13.8       | 13.1        | 18.8        | -12.0       | 13.4        | -27.9       |
| TS-22+BU             | -0.183            | -12.8       | 10.6        | 21.5        | -11.1       | 13.5        | -34.2       |
| TS-23+BU             | -0.181            | -11.8       | 10.5        | 15.6        | -11.0       | 13.1        | -35.5       |
| TS-24+BU             | -0.200            | -11.7       | 12.7        | 20.0        | -11.7       | 13.2        | -20.7       |
| TS-25+BU             | -0.221            | 12.9        | -12.3       | 18.0        | -12.2       | 13.7        | -31.1       |
| TS-26+BU             | -0.189            | -11.1       | 11.7        | 10.8        | -9.7        | 14.1        | -35.3       |
| TS-27+BU             | -0.222            | -13.0       | 13.3        | 16.8        | -11.0       | 15.2        | -34.4       |
| TS-28+BU             | -0.227            | -13.5       | 12.5        | 17.4        | -12.2       | 14.6        | -34.0       |
| TS-29+BU             | -0.227            | 13.9        | -13.8       | 23.1        | -12.5       | 13.8        | -27.8       |
| TS-30+BU             | -0.237            | -13.8       | 14.0        | 23.3        | -13.1       | 14.7        | -27.3       |
| TS-31+BU             | -0.228            | -13.3       | 14.4        | 19.4        | -12.0       | 14.6        | -32.3       |
| TS-32+BU             | -0.200            | 12.7        | -11.9       | 12.1        | -10.1       | 13.1        | -35.7       |
| TS-33+BU             | -0.241            | -14.7       | 14.7        | 24.9        | -13.2       | 13.2        | -24.9       |
| TS-34+BU             | -0.212            | -12.1       | 13.2        | 13.1        | -11.1       | 14.2        | -35.9       |
| TS-35+BU             | -0.231            | 14.0        | -14.0       | 16.6        | -12.0       | 12.7        | -36.1       |
| TS-36+BU             | -0.214            | -13.4       | 13.6        | 16.6        | -10.2       | 15.0        | -36.8       |
| TS-37+BU             | -0.243            | -15.5       | 15.3        | 26.1        | -11.6       | 14.0        | -28.5       |
| TS-38+BU             | -0.249            | -14.2       | 14.7        | 26.7        | -12.8       | 13.6        | -25.9       |
| TS-39+BU             | -0.249            | -14.0       | 14.0        | 26.0        | -14.1       | 14.1        | -26.0       |
| TS-40+BU             | -0.239            | -13.1       | 13.9        | 18.5        | -11.6       | 14.9        | -34.5       |
| TS-41+BU             | -0.190            | -12.7       | 12.7        | 16.2        | -10.9       | 14.2        | -30.7       |
| TS-42+BU             | -0.183            | -13.2       | 12.0        | 13.8        | -10.0       | 14.4        | -34.2       |
| TS-43+BU             | -0.212            | -12.9       | 14.0        | 18.9        | -12.3       | 14.0        | -30.4       |
| TS-44+BU             | -0.209            | 14.3        | -13.1       | 22.4        | -12.5       | 12.7        | -25.1       |
| TS-45+BU             | -0.162            | -12.3       | 10.3        | 9.6         | -8.7        | 13.3        | -35.2       |
| TS-46+BU             | -0.217            | -14.2       | 14.7        | 22.5        | -11.9       | 13.6        | -27.0       |
| TS-47+BU             | -0.204            | -13.2       | 13.4        | 15.7        | -10.9       | 14.5        | -34.5       |
| TS-48+BU             | -0.215            | -13.7       | 14.2        | 18.1        | -12.3       | 14.4        | -32.9       |
| TS-49+BU             | -0.204            | -13.8       | 13.3        | 15.2        | -10.4       | 14.5        | -36.9       |
| TS-50+BU             | -0.235            | -14.2       | 15.2        | 20.4        | -13.4       | 13.9        | -32.6       |
| TS-51+BU             | -0.233            | 15.4        | -14.2       | 24.3        | -12.4       | 14.0        | -27.4       |
| TS-52+BU             | -0.188            | -13.4       | 12.3        | 12.1        | -9.5        | 13.9        | -38.2       |
| TS-53+BU             | -0.241            | -15.1       | 15.8        | 24.5        | -12.6       | 13.6        | -29.5       |
| TS-54+BU             | -0.226            | -14.0       | 14.4        | 16.9        | -11.5       | 14.2        | -37.4       |
| TS-55+BU             | -0.213            | -14.1       | 14.1        | 23.2        | -13.7       | 13.7        | -23.3       |
| TS-56+BU             | -0.215            | -13.3       | 14.2        | 19.0        | -12.9       | 14.4        | -30.4       |
| TS-57+BU             | -0.218            | -13.6       | 14.8        | 18.0        | -12.4       | 14.7        | -34.5       |
| TS-58+BU             | -0.201            | -14.0       | 13.6        | 15.3        | -10.8       | 14.5        | -38.8       |
| TS-59+BU             | -0.238            | -14.5       | 15.8        | 20.9        | -13.5       | 14.3        | -33.6       |
| TS-60+BU             | -0.243            | 16.0        | -14.7       | 25.5        | -12.8       | 14.2        | -28.3       |
| TS-61+BU             | -0.176            | -13.3       | 12.2        | 11.9        | -9.6        | -13.5       | 40.6        |
| TS-62+BU             | -0.249            | -15.3       | 16.5        | 24.9        | -12.8       | 13.9        | -31.8       |
| TS-63+BU             | -0.218            | -14.0       | 14.8        | 16.9        | -11.4       | 14.4        | -39.9       |
| TS-64+BU             | -0.212            | -12.3       | 13.2        | 15.6        | -12.5       | 14.9        | -33.1       |
| TS-65+BU             | -0.196            | -12.5       | 12.1        | 13.1        | -10.9       | 14.8        | -37.0       |
| TS-66+BU             | -0.234            | -13.0       | 14.6        | 18.7        | -13.9       | 14.8        | -33.1       |
| TS-67+BU             | -0.233            | 14.8        | -13.3       | 23.9        | -13.3       | 14.5        | -26.0       |
| TS-68+BU             | -0.167            | -11.7       | 10.4        | 9.2         | -9.5        | -13.5       | 38.8        |
| TS-69+BU             | -0.246            | -14.1       | 15.2        | 23.6        | -13.5       | 14.5        | -29.9       |
| TS-70+BU             | -0.215            | -12.7       | 13.6        | 14.8        | -11.8       | 14.9        | -39.2       |

Table S53.  $\theta_{1-8}$  values for the diene fragments derived from the transition structures of DMB.

| fragment from | $\theta_1$ | $\theta_2$ | $\theta_3$ | $\theta_4$ | $\theta_5$ | $\theta_6$ | $\theta_7$ | $\theta_8$ |
|---------------|------------|------------|------------|------------|------------|------------|------------|------------|
| TS-1+DMB      | 10.7       | -35.9      | 178.5      | 156.2      | 23.8       | -2.2       | -166.3     | -172.2     |
| TS-2+DMB      | 11.0       | -35.9      | 178.6      | 156.6      | 23.3       | 0.3        | -165.2     | -171.2     |
| TS-3+DMB      | 13.7       | -33.7      | -177.3     | 157.3      | 16.0       | 2.6        | -170.3     | -171.2     |
| TS-4+DMB      | 11.7       | -33.7      | -178.5     | 156.6      | 18.9       | 0.0        | -169.5     | -171.6     |
| TS-5+DMB      | 7.8        | -33.0      | 175.5      | 159.3      | 29.2       | -4.4       | -161.8     | -173.4     |
| TS-6+DMB      | 10.5       | -34.3      | 180.0      | 156.3      | 23.7       | -3.4       | -163.3     | -176.4     |
| TS-7+DMB      | 12.2       | -33.2      | -178.0     | 157.0      | 19.6       | -0.9       | -167.5     | -173.9     |
| TS-8+DMB      | 13.0       | -35.5      | -178.4     | 155.9      | 17.4       | 1.7        | -168.8     | -172.1     |
| TS-9+DMB      | 12.5       | -36.6      | -179.9     | 155.9      | 20.8       | 0.9        | -166.5     | -171.9     |
| TS-10+DMB     | 10.4       | -36.5      | 178.0      | 155.9      | 26.3       | 0.0        | -163.0     | -170.7     |
| TS-11+DMB     | -3.4       | 32.3       | -173.3     | -157.8     | -32.7      | 4.4        | 158.0      | 173.7      |
| TS-12+DMB     | 13.1       | -30.8      | -176.3     | 158.6      | 12.8       | 2.4        | -172.3     | -172.4     |
| TS-13+DMB     | 13.5       | -33.6      | -177.3     | 157.3      | 15.6       | 2.3        | -170.5     | -171.6     |
| TS-14+DMB     | 15.1       | -35.3      | -176.5     | 156.3      | 18.1       | 3.1        | -168.9     | -170.0     |
| TS-15+DMB     | 10.1       | -36.4      | 178.8      | 155.0      | 23.7       | 1.5        | -164.3     | -170.4     |
| TS-16+DMB     | 15.4       | -32.1      | -174.9     | 158.2      | 12.6       | 0.5        | -174.0     | -172.9     |
| TS-17+DMB     | 5.8        | -31.9      | 173.8      | 160.0      | 31.9       | -5.8       | -160.0     | -173.8     |
| TS-18+DMB     | -6.8       | 32.4       | -174.7     | -159.7     | -31.2      | 3.2        | 158.7      | 173.2      |
| TS-19+DMB     | 9.3        | -36.6      | 177.7      | 155.1      | 26.8       | -2.8       | -164.2     | -171.9     |
| TS-20+DMB     | 11.7       | -36.7      | 179.0      | 156.0      | 22.5       | -1.3       | -166.9     | -171.9     |
| TS-21+DMB     | 7.2        | -34.3      | 175.9      | 157.0      | 26.6       | -1.0       | -162.7     | -171.7     |
| TS-22+DMB     | 10.7       | -35.6      | -179.7     | 154.8      | 25.8       | -3.7       | -161.6     | -176.2     |
| TS-23+DMB     | 12.5       | -34.8      | -177.5     | 155.3      | 21.9       | -0.4       | -165.2     | -173.3     |
| TS-24+DMB     | 4.3        | -28.0      | 173.6      | 162.7      | 27.4       | -2.4       | -161.6     | -173.4     |
| TS-25+DMB     | -9.3       | 35.4       | -178.6     | -155.3     | -24.6      | 1.2        | 164.7      | 171.9      |
| TS-26+DMB     | 14.2       | -35.0      | -177.9     | 157.0      | 18.3       | 1.6        | -168.9     | -171.2     |
| TS-27+DMB     | 10.2       | -37.4      | 178.8      | 154.1      | 25.3       | 0.1        | -163.1     | -171.5     |
| TS-28+DMB     | 11.1       | -37.2      | 178.8      | 155.2      | 25.2       | -2.1       | -165.2     | -171.7     |
| TS-29+DMB     | -6.7       | 34.1       | -174.9     | -157.8     | -30.9      | 2.8        | 158.6      | 173.3      |
| TS-30+DMB     | 6.9        | -34.1      | 174.3      | 158.5      | 31.2       | -4.2       | -160.0     | -173.0     |
| TS-31+DMB     | 8.8        | -36.6      | 177.8      | 154.4      | 28.6       | 0.2        | -160.2     | -171.0     |
| TS-32+DMB     | -12.0      | 36.3       | 178.2      | -153.9     | -19.6      | -1.1       | 168.5      | 170.9      |
| TS-33+DMB     | 4.2        | -33.1      | 173.0      | 158.1      | 33.1       | -4.2       | -158.1     | -173.0     |
| TS-34+DMB     | 14.4       | -36.5      | -177.6     | 155.4      | 20.8       | 1.5        | -167.6     | -170.1     |
| TS-35+DMB     | -10.6      | 38.3       | 179.0      | -151.2     | -25.3      | -0.8       | 164.2      | 169.7      |
| TS-36+DMB     | 10.4       | -39.0      | 179.7      | 151.8      | 25.3       | 1.6        | -161.8     | -171.3     |
| TS-37+DMB     | 5.4        | -37.5      | 173.8      | 154.1      | 32.5       | -2.0       | -156.2     | -173.4     |
| TS-38+DMB     | -5.0       | 33.8       | -174.3     | -156.9     | -33.2      | 3.6        | 157.0      | 173.5      |
| TS-39+DMB     | 5.8        | -33.4      | 173.7      | 158.7      | 33.4       | -5.8       | -158.7     | -173.7     |
| TS-40+DMB     | 9.9        | -37.5      | 178.8      | 153.6      | 27.4       | -0.8       | -162.0     | -171.4     |
| TS-41+DMB     | 6.8        | -35.3      | 177.7      | 153.8      | 23.8       | 0.6        | -163.5     | -172.1     |
| TS-42+DMB     | 8.3        | -37.2      | 179.4      | 151.7      | 21.0       | 1.8        | -165.1     | -172.1     |
| TS-43+DMB     | 6.6        | -35.4      | 177.3      | 153.9      | 27.7       | -0.5       | -161.3     | -171.5     |
| TS-44+DMB     | -4.5       | 32.8       | -174.4     | -157.3     | -29.8      | 1.7        | 158.6      | 173.3      |
| TS-45+DMB     | 9.4        | -35.6      | -178.5     | 152.3      | 16.4       | 2.5        | -168.7     | -172.4     |
| TS-46+DMB     | 3.1        | -34.2      | 174.3      | 154.6      | 30.7       | -1.0       | -157.6     | -172.7     |
| TS-47+DMB     | 8.2        | -37.4      | 179.2      | 151.6      | 24.3       | 1.7        | -162.8     | -171.2     |
| TS-48+DMB     | 8.0        | -37.3      | 178.0      | 152.8      | 27.6       | 1.4        | -160.4     | -170.6     |
| TS-49+DMB     | 9.4        | -39.5      | 179.7      | 150.2      | 24.6       | 2.5        | -162.1     | -170.8     |
| TS-50+DMB     | 6.7        | -37.4      | 177.3      | 152.1      | 30.9       | 0.7        | -158.3     | -170.2     |
| TS-51+DMB     | -3.5       | 35.9       | -173.4     | -154.2     | -31.8      | 1.9        | 156.8      | 173.3      |
| TS-52+DMB     | 10.6       | -39.0      | -178.4     | 149.9      | 20.8       | 3.2        | -165.1     | -170.8     |
| TS-53+DMB     | 4.0        | -36.1      | 174.6      | 153.2      | 34.1       | -0.3       | -154.3     | -171.8     |
| TS-54+DMB     | 9.3        | -39.5      | -180.0     | 149.8      | 27.4       | 2.7        | -159.9     | -170.0     |
| TS-55+DMB     | 3.8        | -31.9      | 172.8      | 159.1      | 31.9       | -3.8       | -159.1     | -172.8     |
| TS-56+DMB     | 8.0        | -35.6      | 176.8      | 155.5      | 28.2       | -1.3       | -162.3     | -170.9     |
| TS-57+DMB     | 8.0        | -38.1      | 178.1      | 151.8      | 28.8       | 1.5        | -159.7     | -170.0     |
| TS-58+DMB     | 9.9        | -40.4      | -179.4     | 148.9      | 24.6       | 2.7        | -162.1     | -170.6     |
| TS-59+DMB     | 6.1        | -38.1      | 177.0      | 151.0      | 32.2       | 0.6        | -157.4     | -169.8     |
| TS-60+DMB     | -4.4       | 37.0       | -173.7     | -153.7     | -32.8      | 1.2        | 155.5      | 172.9      |
| TS-61+DMB     | 11.7       | -39.6      | -177.1     | 149.1      | 20.6       | 3.2        | -165.3     | -170.9     |
| TS-62+DMB     | 4.3        | -37.8      | 175.2      | 151.3      | 35.2       | -0.2       | -153.5     | -171.5     |
| TS-63+DMB     | 10.1       | -40.7      | -179.3     | 148.7      | 28.0       | 2.8        | -159.5     | -169.8     |
| TS-64+DMB     | 10.2       | -35.9      | 178.7      | 155.5      | 25.3       | 0.0        | -164.3     | -170.3     |
| TS-65+DMB     | 11.7       | -37.9      | -179.4     | 153.2      | 22.2       | 0.9        | -166.0     | -170.9     |
| TS-66+DMB     | 9.2        | -36.8      | 178.0      | 154.3      | 29.1       | -0.7       | -161.7     | -169.8     |
| TS-67+DMB     | -5.4       | 34.5       | -173.6     | -157.3     | -30.6      | 3.5        | 159.6      | 173.4      |
| TS-68+DMB     | 13.1       | -36.4      | -176.7     | 153.4      | 17.6       | 1.5        | -169.6     | -171.3     |
| TS-69+DMB     | 6.1        | -35.7      | 175.1      | 155.3      | 32.9       | -2.5       | -157.7     | -171.8     |
| TS-70+DMB     | 12.2       | -39.1      | -178.9     | 152.0      | 25.4       | 1.1        | -163.7     | -169.9     |



**Table S54.**  $\Delta d_{C3C6}$ ,  $\tau_{56}$ ,  $\tau_{34}$ ,  $\chi_{C3}$ ,  $\chi_{C4}$ ,  $\chi_{C5}$  and  $\chi_{C6}$  values for the diene fragments derived from the transition structures of **DMB**.

| <i>fragment from</i> | $\Delta d_{C3C6}$ | $\tau_{56}$ | $\tau_{34}$ | $\chi_{C3}$ | $\chi_{C4}$ | $\chi_{C5}$ | $\chi_{C6}$ |
|----------------------|-------------------|-------------|-------------|-------------|-------------|-------------|-------------|
| TS-1+DMB             | -0.194            | 12.6        | 10.8        | 16.0        | 10.0        | 12.1        | 34.4        |
| TS-2+DMB             | -0.184            | 12.4        | 11.8        | 14.5        | 8.5         | 12.4        | 34.5        |
| TS-3+DMB             | -0.143            | 10.0        | 9.3         | 7.1         | 6.3         | 11.0        | 36.4        |
| TS-4+DMB             | -0.174            | 11.0        | 9.4         | 10.5        | 8.5         | 10.3        | 35.2        |
| TS-5+DMB             | -0.203            | 12.6        | 12.4        | 22.6        | 10.9        | 12.2        | 28.5        |
| TS-6+DMB             | -0.161            | 11.9        | 10.1        | 20.1        | 7.0         | 10.5        | 34.2        |
| TS-7+DMB             | -0.154            | 10.5        | 9.3         | 13.4        | 7.1         | 10.2        | 35.2        |
| TS-8+DMB             | -0.157            | 11.2        | 9.6         | 9.5         | 6.2         | 11.4        | 37.0        |
| TS-9+DMB             | -0.172            | 12.0        | 10.8        | 12.6        | 7.3         | 12.4        | 36.6        |
| TS-10+DMB            | -0.199            | 13.0        | 13.1        | 17.0        | 9.4         | 12.3        | 34.5        |
| TS-11+DMB            | -0.208            | 14.5        | 14.1        | 26.4        | 10.7        | 10.1        | 25.6        |
| TS-12+DMB            | -0.124            | 8.8         | 7.6         | 5.3         | 5.1         | 9.4         | 34.5        |
| TS-13+DMB            | -0.137            | 10.0        | 9.0         | 7.2         | 6.1         | 10.8        | 36.3        |
| TS-14+DMB            | -0.156            | 10.1        | 10.6        | 8.0         | 7.0         | 11.6        | 38.8        |
| TS-15+DMB            | -0.188            | 13.1        | 12.6        | 14.1        | 8.0         | 11.4        | 35.1        |
| TS-16+DMB            | -0.144            | 8.4         | 6.5         | 5.5         | 6.6         | 10.3        | 37.2        |
| TS-17+DMB            | -0.215            | 13.1        | 13.1        | 25.7        | 12.0        | 12.0        | 25.7        |
| TS-18+DMB            | -0.207            | 12.8        | 14.0        | 24.4        | 10.0        | 12.1        | 27.1        |
| TS-19+DMB            | -0.208            | 13.6        | 12.0        | 18.7        | 10.9        | 11.7        | 34.3        |
| TS-20+DMB            | -0.193            | 12.5        | 10.6        | 14.4        | 9.4         | 12.7        | 35.7        |
| TS-21+DMB            | -0.197            | 13.6        | 12.8        | 18.3        | 9.3         | 11.2        | 30.2        |
| TS-22+DMB            | -0.174            | 12.5        | 11.1        | 22.0        | 7.4         | 10.4        | 35.9        |
| TS-23+DMB            | -0.167            | 11.1        | 10.7        | 15.2        | 7.1         | 10.0        | 37.2        |
| TS-24+DMB            | -0.189            | 11.8        | 12.5        | 20.8        | 9.0         | 10.7        | 21.5        |
| TS-25+DMB            | -0.199            | 13.1        | 11.7        | 16.5        | 9.3         | 10.7        | 34.1        |
| TS-26+DMB            | -0.172            | 10.4        | 10.0        | 9.5         | 7.2         | 12.0        | 37.1        |
| TS-27+DMB            | -0.203            | 13.6        | 12.7        | 16.8        | 8.4         | 11.4        | 36.1        |
| TS-28+DMB            | -0.207            | 13.0        | 11.6        | 16.9        | 10.4        | 12.3        | 36.0        |
| TS-29+DMB            | -0.219            | 13.7        | 14.0        | 24.2        | 9.5         | 11.8        | 29.0        |
| TS-30+DMB            | -0.221            | 13.6        | 13.5        | 24.1        | 11.2        | 12.6        | 28.4        |
| TS-31+DMB            | -0.212            | 13.9        | 14.4        | 19.6        | 8.8         | 11.0        | 34.4        |
| TS-32+DMB            | -0.180            | 12.1        | 10.3        | 10.5        | 8.0         | 10.2        | 38.1        |
| TS-33+DMB            | -0.229            | 14.4        | 14.4        | 26.0        | 11.2        | 11.2        | 26.0        |
| TS-34+DMB            | -0.190            | 11.1        | 11.2        | 10.9        | 8.4         | 12.0        | 39.0        |
| TS-35+DMB            | -0.209            | 13.9        | 13.0        | 15.0        | 9.4         | 9.6         | 39.3        |
| TS-36+DMB            | -0.196            | 14.3        | 13.5        | 16.6        | 7.2         | 10.8        | 38.7        |
| TS-37+DMB            | -0.228            | 16.0        | 15.2        | 25.8        | 8.6         | 11.6        | 31.3        |
| TS-38+DMB            | -0.230            | 14.4        | 14.8        | 26.7        | 10.1        | 10.7        | 28.1        |
| TS-39+DMB            | -0.233            | 13.8        | 13.8        | 27.1        | 12.1        | 12.1        | 27.1        |
| TS-40+DMB            | -0.218            | 13.8        | 13.3        | 18.8        | 9.4         | 11.1        | 36.3        |
| TS-41+DMB            | -0.177            | 14.2        | 12.2        | 15.9        | 7.3         | 9.1         | 33.1        |
| TS-42+DMB            | -0.169            | 14.5        | 11.4        | 13.1        | 6.1         | 8.9         | 36.6        |
| TS-43+DMB            | -0.198            | 14.4        | 13.6        | 19.2        | 9.0         | 9.3         | 32.7        |
| TS-44+DMB            | -0.197            | 14.2        | 14.0        | 23.1        | 8.4         | 10.1        | 27.1        |
| TS-45+DMB            | -0.151            | 13.1        | 9.4         | 8.8         | 5.1         | 7.9         | 37.0        |
| TS-46+DMB            | -0.204            | 15.5        | 14.9        | 23.4        | 8.3         | 8.8         | 28.5        |
| TS-47+DMB            | -0.189            | 14.6        | 13.0        | 15.5        | 7.1         | 9.0         | 36.6        |
| TS-48+DMB            | -0.197            | 14.6        | 14.5        | 18.1        | 8.0         | 10.0        | 35.3        |
| TS-49+DMB            | -0.186            | 15.1        | 13.6        | 15.4        | 6.7         | 9.7         | 39.1        |
| TS-50+DMB            | -0.216            | 15.3        | 15.8        | 21.1        | 9.2         | 9.4         | 34.7        |
| TS-51+DMB            | -0.215            | 16.2        | 15.0        | 25.0        | 8.6         | 10.2        | 29.3        |
| TS-52+DMB            | -0.171            | 14.2        | 12.0        | 11.6        | 5.9         | 8.9         | 40.7        |
| TS-53+DMB            | -0.223            | 16.1        | 16.9        | 25.9        | 8.4         | 9.3         | 30.8        |
| TS-54+DMB            | -0.207            | 15.1        | 15.0        | 17.4        | 7.3         | 9.3         | 39.5        |
| TS-55+DMB            | -0.205            | 14.1        | 14.1        | 24.7        | 11.0        | 11.0        | 24.7        |
| TS-56+DMB            | -0.201            | 13.8        | 13.4        | 19.0        | 10.4        | 11.2        | 32.5        |
| TS-57+DMB            | -0.199            | 15.1        | 15.1        | 18.8        | 8.6         | 9.8         | 36.2        |
| TS-58+DMB            | -0.182            | 15.3        | 13.6        | 15.3        | 6.7         | 9.3         | 41.0        |
| TS-59+DMB            | -0.219            | 16.0        | 16.4        | 22.1        | 9.6         | 9.1         | 35.2        |
| TS-60+DMB            | -0.224            | 16.3        | 15.8        | 25.6        | 8.3         | 10.7        | 30.7        |
| TS-61+DMB            | -0.166            | 14.0        | 11.9        | 11.5        | 5.9         | 8.8         | 42.5        |
| TS-62+DMB            | -0.230            | 16.8        | 17.5        | 26.7        | 8.7         | 9.1         | 33.0        |
| TS-63+DMB            | -0.201            | 15.3        | 15.4        | 17.7        | 7.5         | 9.4         | 41.4        |
| TS-64+DMB            | -0.192            | 12.9        | 12.7        | 15.6        | 9.6         | 11.4        | 34.6        |
| TS-65+DMB            | -0.181            | 13.1        | 11.6        | 13.1        | 8.2         | 11.1        | 38.5        |
| TS-66+DMB            | -0.213            | 13.8        | 14.2        | 19.0        | 10.9        | 11.1        | 34.8        |
| TS-67+DMB            | -0.215            | 14.6        | 13.5        | 24.0        | 10.2        | 11.7        | 28.1        |
| TS-68+DMB            | -0.158            | 11.6        | 9.5         | 8.9         | 7.1         | 9.8         | 39.7        |
| TS-69+DMB            | -0.226            | 14.8        | 15.2        | 24.8        | 10.7        | 10.9        | 30.8        |
| TS-70+DMB            | -0.200            | 13.4        | 13.2        | 15.2        | 9.0         | 11.1        | 40.2        |



**Table S55.** Results obtained by applying ANOVA of the selected most significant factors of the distortion energy ( $\Delta E_d^\ddagger$ ).

$$\Delta E_d^\ddagger \sim a.NS + b.RS + c.\omega + d.\Delta d + e. \Delta d^2 + f$$

| Source                                                | Sum of Squares | Mean Square | F value    | Prob. > F | Significant |
|-------------------------------------------------------|----------------|-------------|------------|-----------|-------------|
| <b>cyclopentadiene, acyclic dienophile</b>            |                |             |            |           |             |
| NS                                                    | 541.307418     | 541.307418  | 255.302404 | < 0.0001  | Yes         |
| $\Delta d$                                            | 19.2813963     | 19.2813963  | 9.09388393 | 0.0047    | Yes         |
| $\Delta d^2$                                          | 34.9674761     | 34.9674761  | 16.4920716 | 0.0003    | Yes         |
| <b>1,3-cyclohexadiene, acyclic dienophile</b>         |                |             |            |           |             |
| NS                                                    | 828.348766     | 828.348766  | 300.933046 | < 0.0001  | Yes         |
| $\Delta d$                                            | 12.6220048     | 12.6220048  | 4.585482   | 0.0391    | Yes         |
| $\Delta d^2$                                          | 33.3766019     | 33.3766019  | 12.1254753 | 0.0013    | Yes         |
| <b>butadiene, acyclic dienophile</b>                  |                |             |            |           |             |
| NS                                                    | 500.172332     | 500.172332  | 204.606593 | < 0.0001  | Yes         |
| $\Delta d$                                            | 8.91571247     | 8.91571247  | 3.64717006 | 0.0642    | No          |
| $\Delta d^2$                                          | 30.4772341     | 30.4772341  | 12.467389  | 0.0012    | Yes         |
| <b>2,3-dimethyl-1,3-butadiene, acyclic dienophile</b> |                |             |            |           |             |
| NS                                                    | 468.346637     | 468.346637  | 190.507623 | < 0.0001  | Yes         |
| $\Delta d$                                            | 16.6827613     | 16.6827613  | 6.78598489 | 0.0133    | Yes         |
| $\Delta d^2$                                          | 46.1834736     | 46.1834736  | 18.7858801 | 0.0001    | Yes         |
| <b>cyclopentadiene, cyclic dienophile</b>             |                |             |            |           |             |
| NS                                                    | 313.489542     | 313.489542  | 144.497017 | < 0.0001  | Yes         |
| RS                                                    | 124.344859     | 124.344859  | 57.3143878 | < 0.0001  | Yes         |
| $\omega$                                              | 65.0953644     | 65.0953644  | 30.0044649 | < 0.0001  | Yes         |
| $\Delta d$                                            | 8.38609293     | 8.38609293  | 3.86540937 | 0.0605    | No          |
| <b>1,3-cyclohexadiene, cyclic dienophile</b>          |                |             |            |           |             |
| NS                                                    | 595.317282     | 595.317282  | 273.628315 | < 0.0001  | Yes         |
| RS                                                    | 165.305079     | 165.305079  | 75.9799046 | < 0.0001  | Yes         |
| $\omega$                                              | 89.0675208     | 89.0675208  | 40.9384984 | < 0.0001  | Yes         |
| $\Delta d$                                            | 14.0664356     | 14.0664356  | 6.46541802 | 0.0176    | Yes         |
| <b>butadiene, cyclic dienophile</b>                   |                |             |            |           |             |
| NS                                                    | 249.82791      | 249.82791   | 112.175589 | < 0.0001  | Yes         |
| RS                                                    | 112.217068     | 112.217068  | 50.3867469 | < 0.0001  | Yes         |
| $\omega$                                              | 71.3928979     | 71.3928979  | 32.0562277 | < 0.0001  | Yes         |
| $\Delta d$                                            | 55.6381374     | 55.6381374  | 24.98216   | < 0.0001  | Yes         |
| <b>2,3-dimethyl-1,3-butadiene, cyclic dienophile</b>  |                |             |            |           |             |
| NS                                                    | 226.888912     | 226.888912  | 98.8200493 | < 0.0001  | Yes         |
| RS                                                    | 91.606532      | 91.606532   | 39.8986531 | < 0.0001  | Yes         |
| $\omega$                                              | 74.1711259     | 74.1711259  | 32.3047709 | < 0.0001  | Yes         |
| $\Delta d$                                            | 58.2771873     | 58.2771873  | 25.3822651 | < 0.0001  | Yes         |

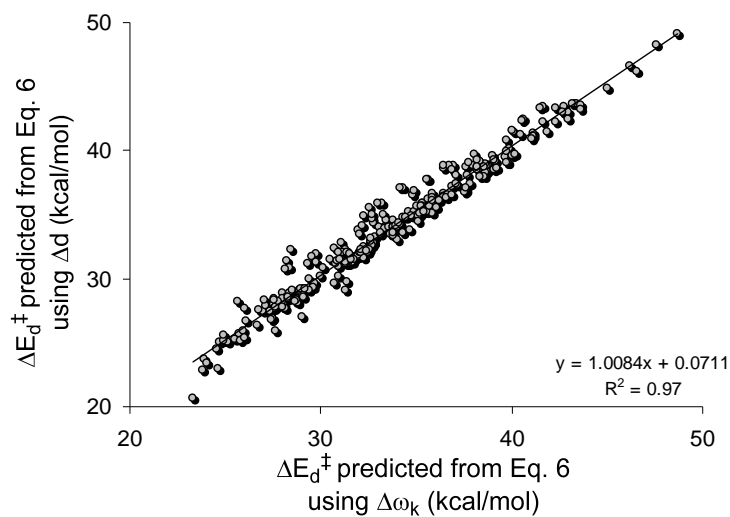

**Figure S20.** Plot of  $\Delta E_d^\ddagger$  predicted from Eq. 6 (using  $\Delta d$ ) versus  $\Delta E_d^\ddagger$  predicted from Eq. 6 (using  $\Delta\omega_k$ ) for the 280 reactions under study.

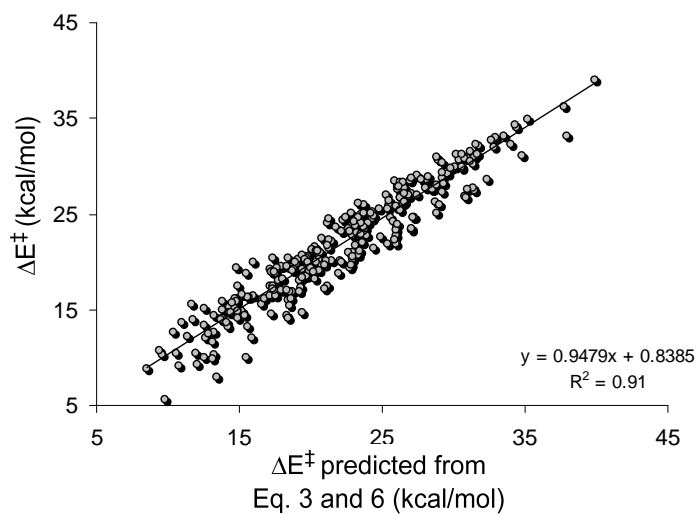

**Figure S21.** Plot of B3LYP/6-31G\* activation barriers ( $\Delta E^\ddagger$ ) versus the barrier heights predicted from Eq. 3 and 6 for the 280 reactions under study.

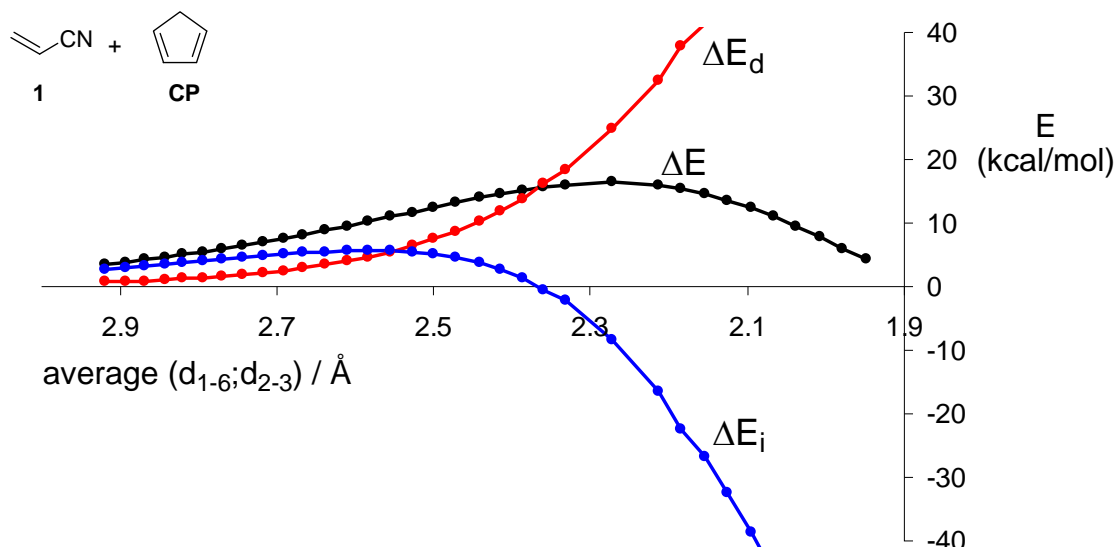

**Figure S22.** Distortion/interaction analysis of the Diels-Alder reaction between **1** and **CP** along the reaction coordinate projected onto the average forming C-C distances.

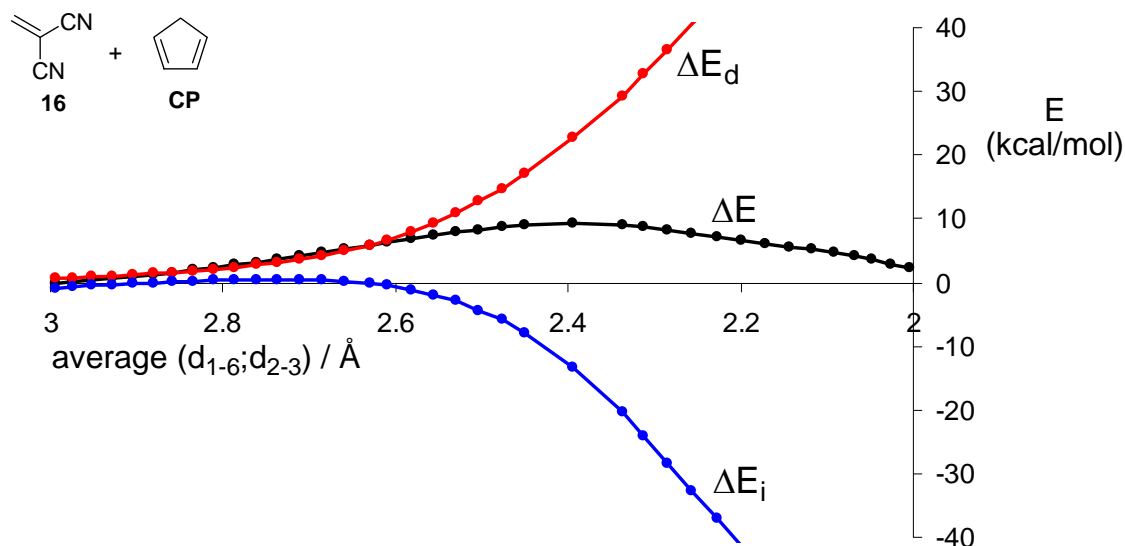

**Figure S23.** Distortion/interaction analysis of the Diels-Alder reaction between **16** and **CP** along the reaction coordinate projected onto the average forming C-C distances.

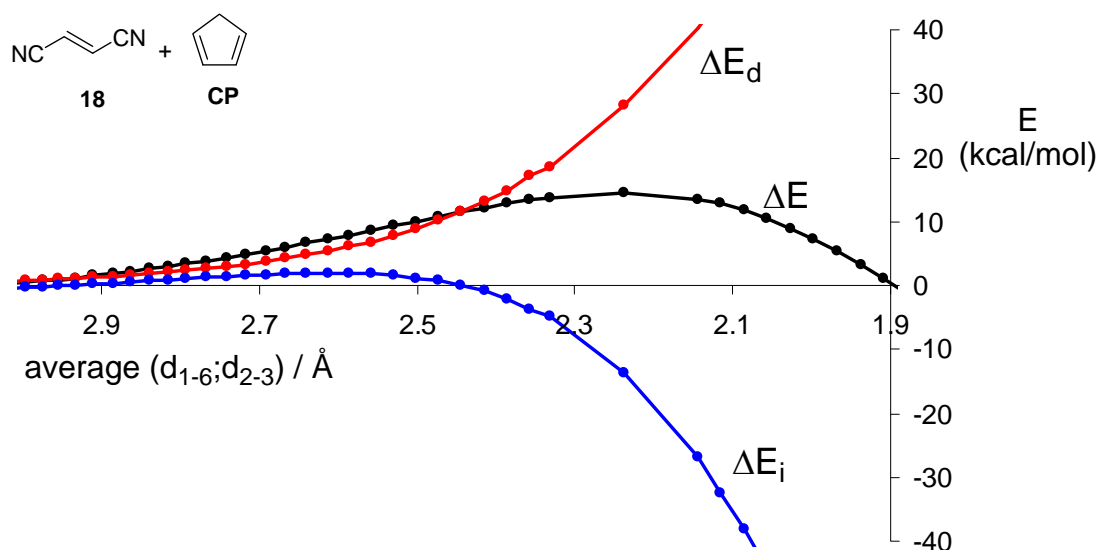

**Figure S24.** Distortion/interaction analysis of the Diels-Alder reaction between **18** and **CP** along the reaction coordinate projected onto the average forming C-C distances.

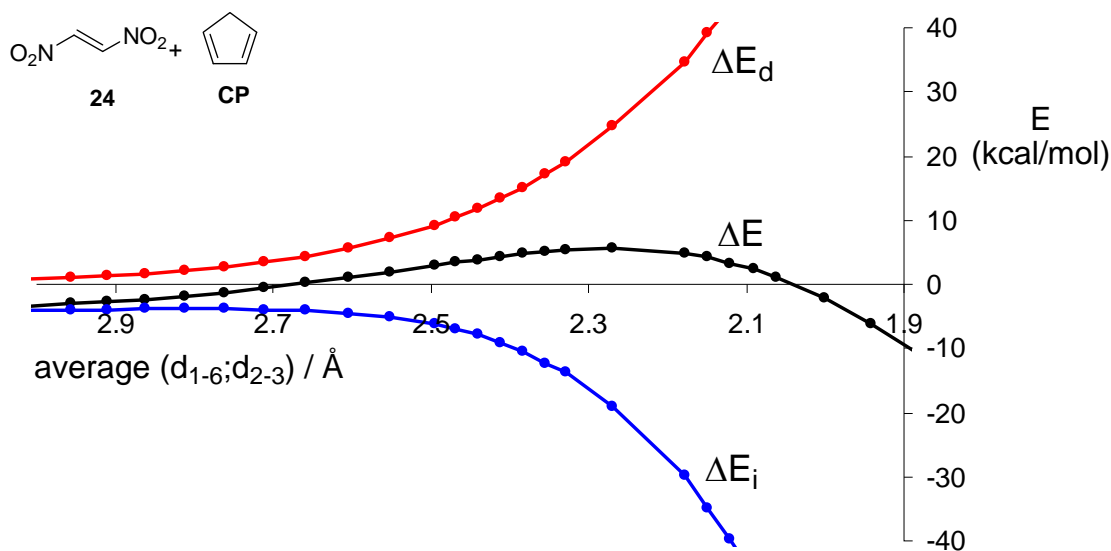

Figure S25. Distortion/interaction analysis of the Diels-Alder reaction between **24** and **CP** along the reaction coordinate projected onto the average forming C-C distances.

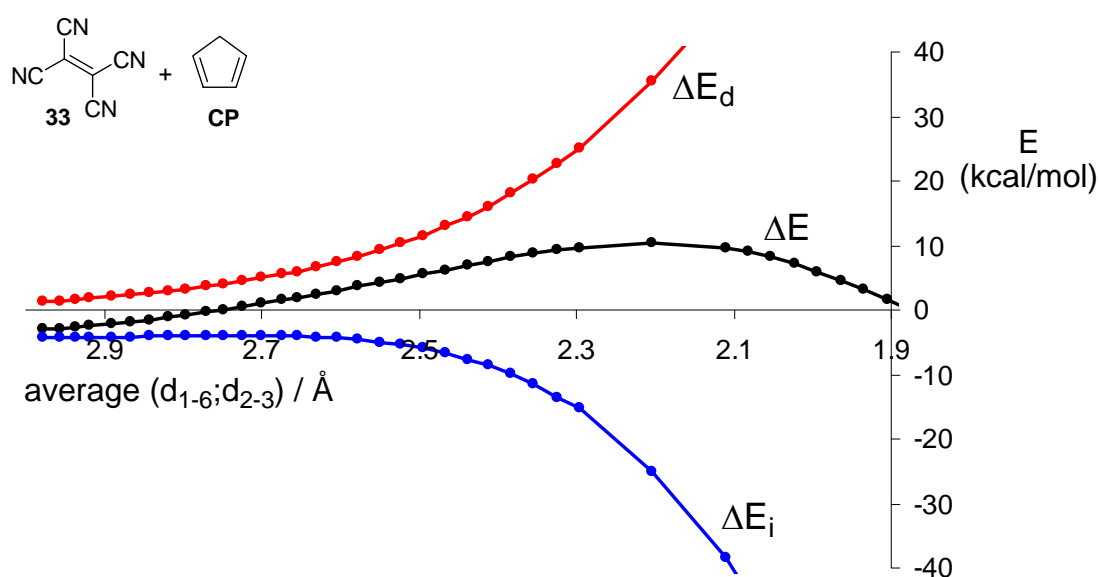

Figure S26. Distortion/interaction analysis of the Diels-Alder reaction between **33** and **CP** along the reaction coordinate projected onto the average forming C-C distances.

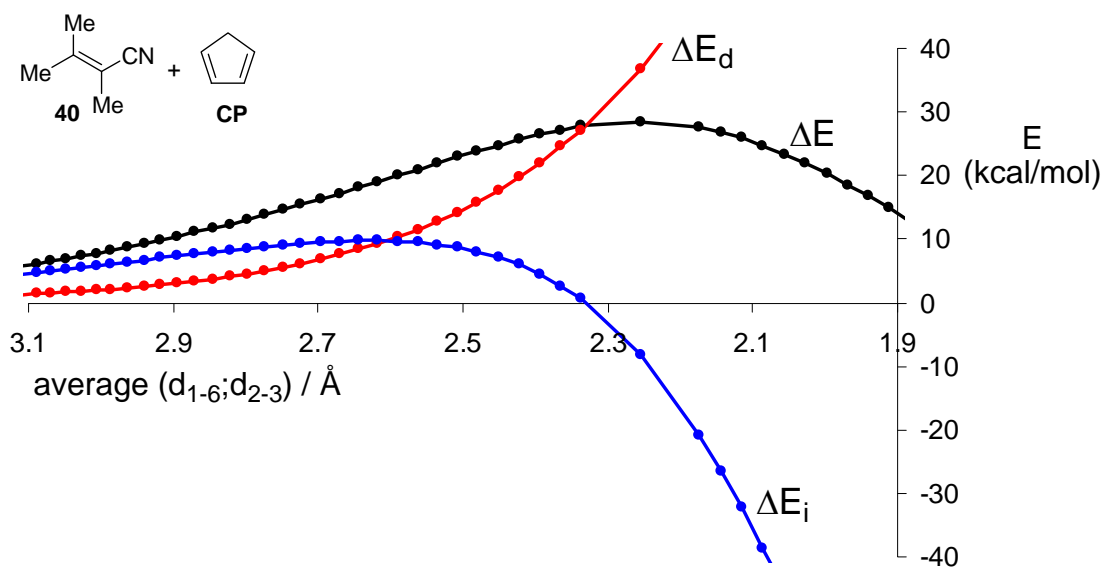

Figure S27. Distortion/interaction analysis of the Diels-Alder reaction between **40** and **CP** along the reaction coordinate projected onto the average forming C-C distances.

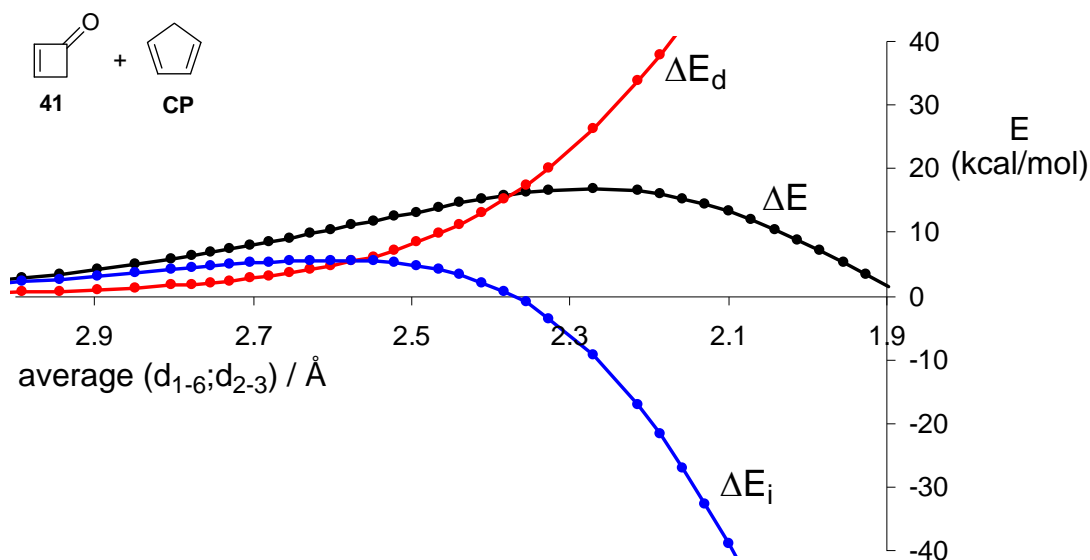

**Figure S28.** Distortion/interaction analysis of the Diels-Alder reaction between **41** and **CP** along the reaction coordinate projected onto the average forming C-C distances.

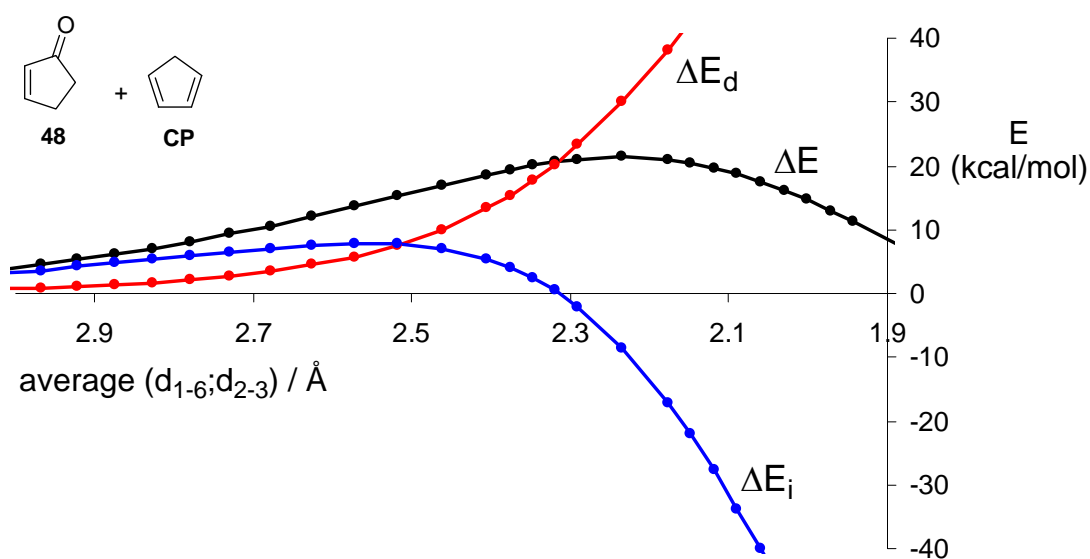

**Figure S29.** Distortion/interaction analysis of the Diels-Alder reaction between **48** and **CP** along the reaction coordinate projected onto the average forming C-C distances.

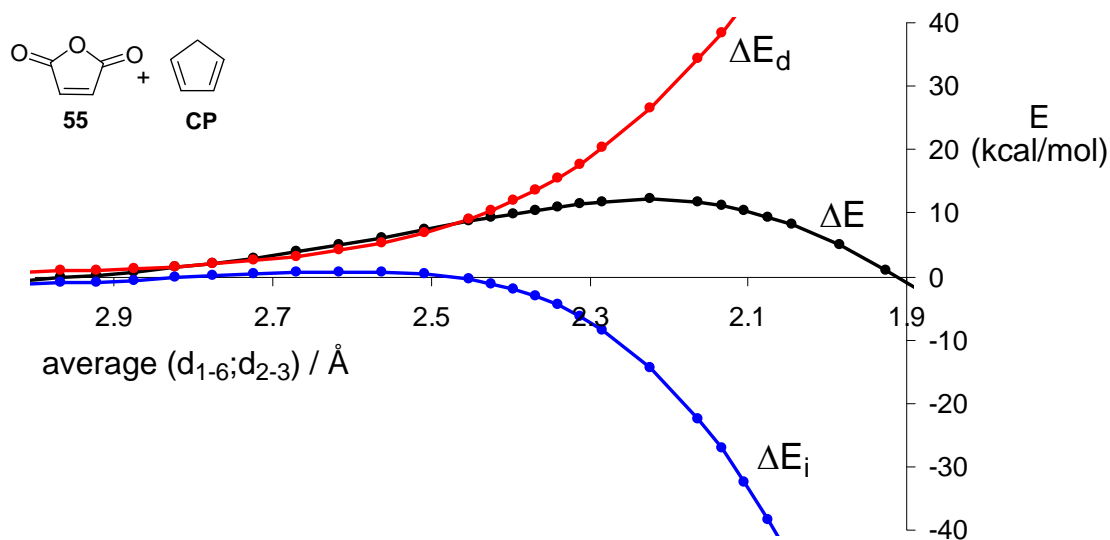

**Figure S30.** Distortion/interaction analysis of the Diels-Alder reaction between **55** and **CP** along the reaction coordinate projected onto the average forming C-C distances.

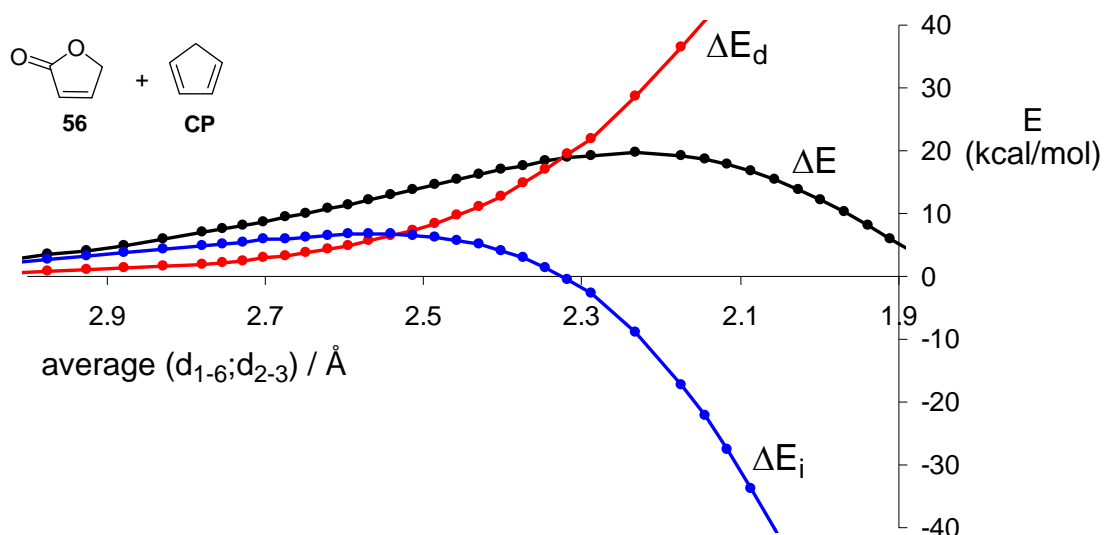

**Figure S31.** Distortion/interaction analysis of the Diels-Alder reaction between **56** and **CP** along the reaction coordinate projected onto the average forming C-C distances.

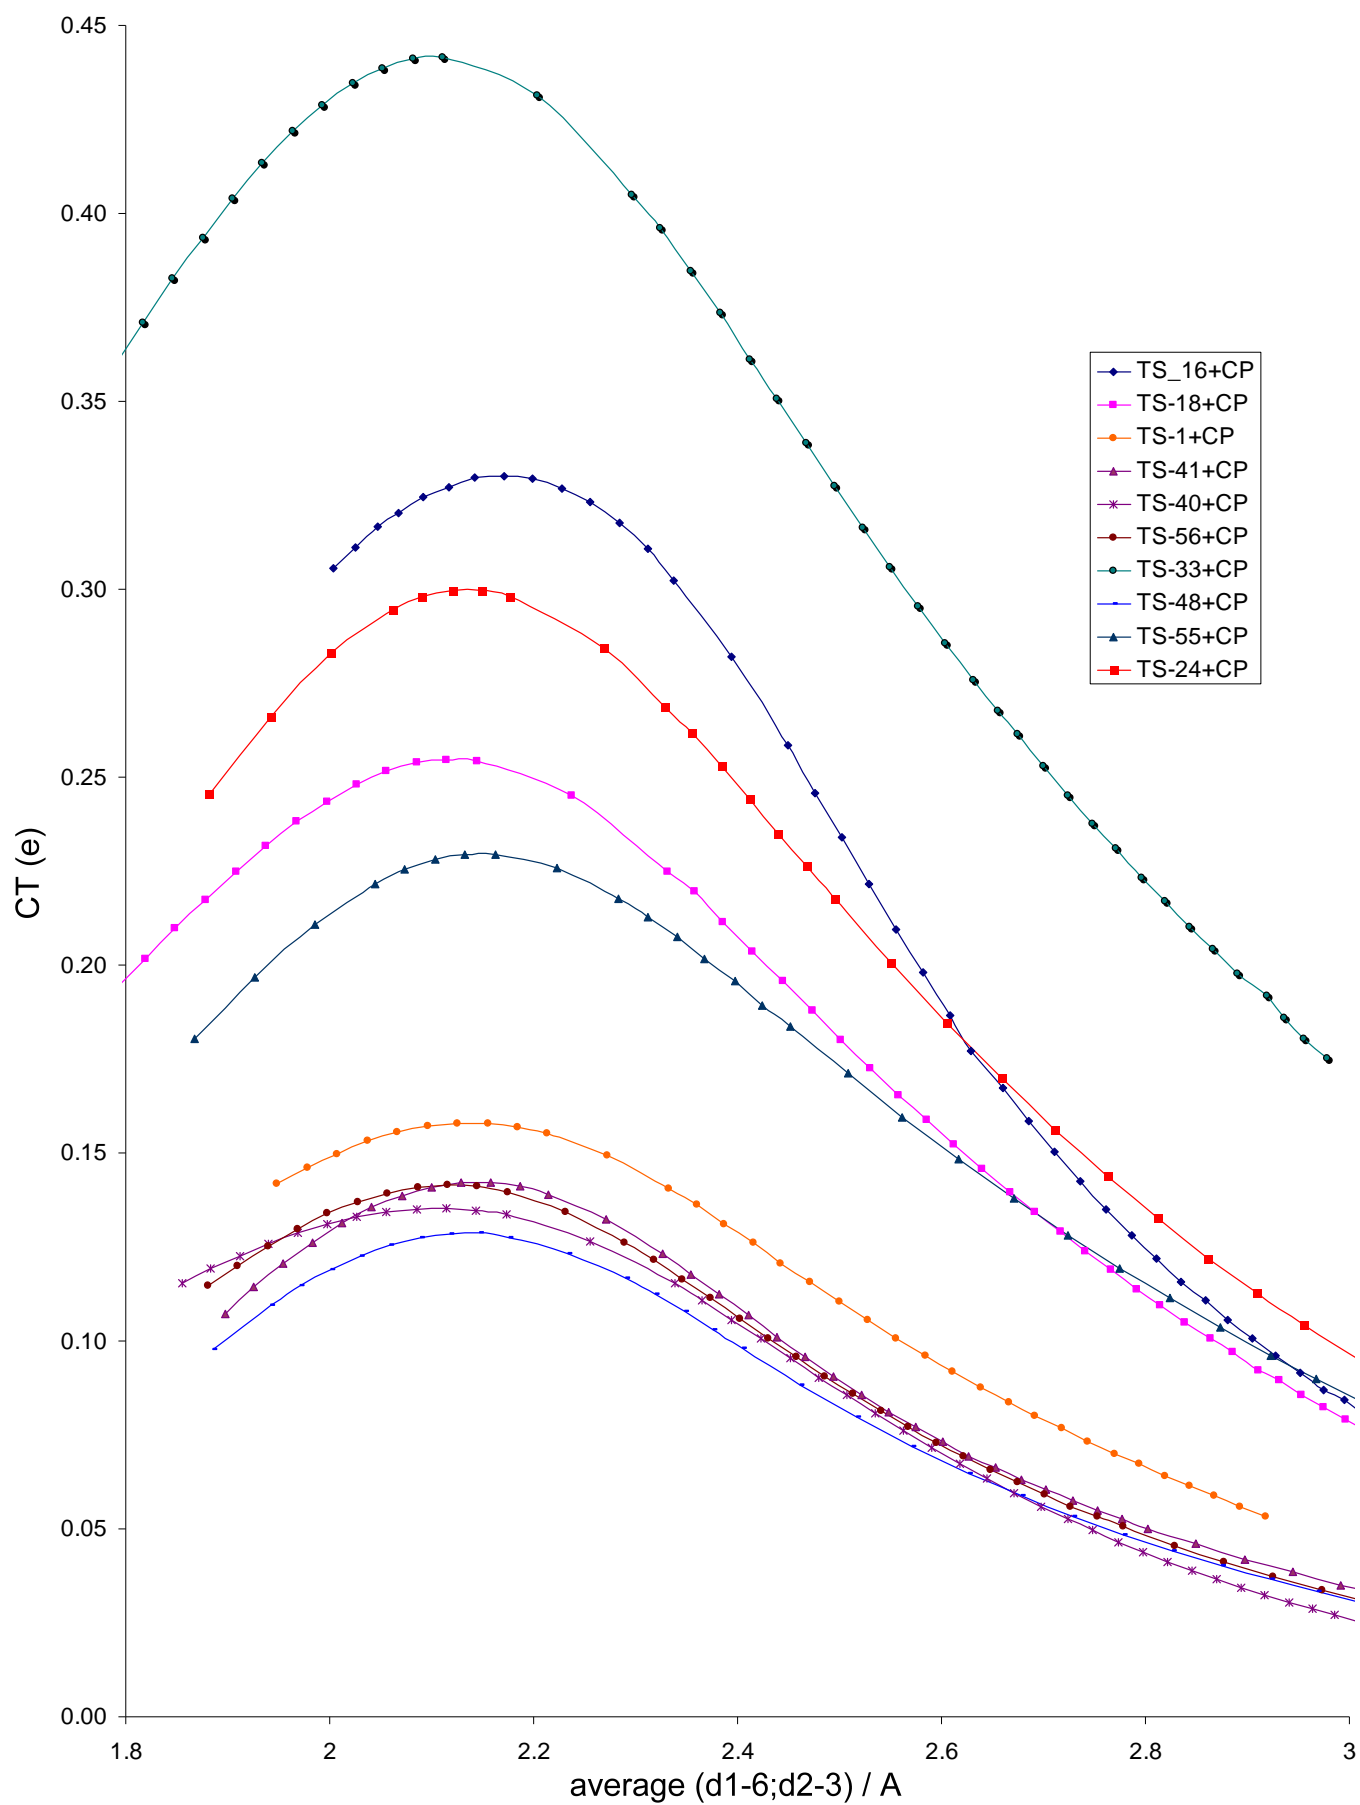

**Figure S32.** Plot of charge transfer (CT) versus the average bond forming C-C distances for the reactions of compounds **1**, **16**, **18**, **24**, **33**, **40**, **41**, **48**, **55** and **56** with CP.

**Cartesian coordinates of B3LYP/6-31G\*  
optimized geometries of all reagents, TSs and  
products under study.**

**CP**

B3LYP/6-31G(d) Geometry

C 0 -1.184605 -0.603316 0.000074  
C 0 -1.105864 0.901505 0.000022  
C 0 0.377042 1.169229 0.000034  
C 0 1.037102 -0.007176 0.000086  
C 0 0.065590 -1.109886 0.000110  
H 0 -2.114404 -1.160817 0.000075  
H 0 -1.604263 1.340615 0.878249  
H 0 -1.604245 1.340549 -0.878249  
H 0 0.812943 2.161863 0.000013  
H 0 2.114404 -0.140017 0.000109  
H 0 0.333117 -2.161863 0.000152

**CH**

B3LYP/6-31G(d) Geometry

C 0 -1.173192 -0.726224 -0.103992  
C 0 -0.026655 -1.425057 -0.064415  
C 0 1.282375 -0.731771 0.239498  
C 0 1.282377 0.731769 -0.239498  
C 0 -0.026651 1.425058 0.064415  
C 0 -1.173191 0.726227 0.103992  
H 0 -2.123966 -1.227269 -0.271916  
H 0 -0.028853 -2.506312 -0.184428  
H 0 2.123963 -1.272145 -0.209644  
H 0 1.448797 -0.763119 1.330072  
H 0 1.448800 0.763116 -1.330072  
H 0 2.123966 1.272139 0.209644  
H 0 -0.028847 2.506312 0.184427  
H 0 -2.123964 1.227274 0.271917

**BU**

B3LYP/6-31G(d) Geometry

C 0 -0.564669 -1.705847 0.000001  
C 0 -0.564669 -0.364047 0.000001  
C 0 0.564670 0.364047 0.000001  
C 0 0.564670 1.705847 -0.000001  
H 0 -1.512018 -2.269991 0.000003  
H 0 0.367439 -2.294642 0.000001  
H 0 -1.542843 0.148021 0.000003  
H 0 1.542843 -0.148023 0.000001  
H 0 1.512018 2.269993 0.000001  
H 0 -0.367438 2.294642 -0.000003

**DMB**

B3LYP/6-31G(d) Geometry

C 0 1.027818 -1.532254 -0.000134  
C 0 0.705685 -0.227103 -0.000010  
C 0 -0.705751 0.227041 -0.000044  
C 0 -1.028011 1.532155 -0.000125  
C 0 1.798510 0.818872 0.000030  
C 0 -1.798500 -0.819005 0.000036  
H 0 2.065828 -1.853209 -0.000121  
H 0 0.284552 -2.322315 -0.000215  
H 0 -2.066054 1.852999 -0.000151  
H 0 -0.284851 2.322315 -0.000194  
H 0 1.732916 1.468391 -0.881712  
H 0 1.732774 1.468434 0.881753

H 0 2.786372 0.349666 0.000081  
H 0 -2.786372 -0.349832 0.000172  
H 0 -1.732891 -1.468491 -0.881753  
H 0 -1.732669 -1.468592 0.881734

**1**

B3LYP/6-31G(d) Geometry

C 0 0.220841 0.431947 -0.000000  
C 0 1.243285 -0.432065 -0.000000  
C 0 -1.148679 0.016572 -0.000000  
N 0 -2.268674 -0.298602 -0.000000  
H 0 0.390568 1.506122 0.000000  
H 0 2.268674 -0.076304 0.000000  
H 0 1.086086 -1.506122 -0.000000

**2**

B3LYP/6-31G(d) Geometry

C 0 1.317646 0.177940 -0.000331  
C 0 0.115889 -0.410297 -0.000064  
C 0 -1.123937 0.388921 -0.000018  
O 0 -2.243257 -0.084648 -0.000363  
H 0 2.243257 -0.389930 -0.000132  
H 0 1.412193 1.262508 -0.000558  
H 0 -0.003681 -1.491307 0.000259  
H 0 -0.964542 1.491307 0.000558

**3**

B3LYP/6-31G(d) Geometry

C 0 2.227963 0.334110 -0.000358  
C 0 1.101348 -0.395906 -0.000272  
C 0 -0.193710 0.253513 -0.000296  
O 0 -1.248949 -0.397752 -0.000195  
B 0 -2.700969 0.285635 -0.000219  
H 0 3.210101 -0.128059 -0.000345  
H 0 2.199189 1.421385 -0.000445  
H 0 1.110788 -1.482471 -0.000182  
H 0 -0.248279 1.350519 -0.000369  
H 0 -3.209820 -0.148963 1.007256  
H 0 -3.210101 -0.149654 -1.007256  
H 0 -2.495382 1.482471 -0.000663

**4**

B3LYP/6-31G(d) Geometry

C 0 -0.098764 -0.415828 -0.000882  
C 0 -1.230799 0.276592 0.000836  
N 0 1.200044 0.263022 -0.000143  
O 0 2.186278 -0.474634 0.001030  
O 0 1.228526 1.492120 -0.000443  
H 0 0.008569 -1.492120 -0.002430  
H 0 -2.186278 -0.236805 0.000577  
H 0 -1.218390 1.360921 0.002430

**5**

B3LYP/6-31G(d) Geometry

C 0 0.014503 -0.447510 -0.000343  
C 0 -1.118552 0.247837 -0.000314  
C 0 1.369854 0.186668 -0.000320  
F 0 2.082840 -0.194147 -1.086218  
F 0 2.082391 -0.193124 1.086218  
F 0 1.317882 1.533916 -0.000977  
H 0 0.033396 -1.533916 -0.000329  
H 0 -2.082840 -0.250719 -0.000331  
H 0 -1.120494 1.333193 -0.000287



## 6

### B3LYP/6-31G(d) Geometry

|     |           |           |           |
|-----|-----------|-----------|-----------|
| C 0 | 1.924949  | -0.250698 | -0.029604 |
| C 0 | 0.741807  | -0.886639 | -0.048530 |
| B 0 | -0.651418 | -0.176326 | -0.048725 |
| C 0 | -1.948975 | -1.081898 | -0.038902 |
| C 0 | -0.808460 | 1.395758  | -0.038850 |
| H 0 | 2.878794  | -0.777246 | -0.033822 |
| H 0 | 1.990846  | 0.835381  | -0.009837 |
| H 0 | 0.775875  | -1.979914 | -0.068902 |
| H 0 | -2.070714 | -1.494225 | 0.977062  |
| H 0 | -1.858840 | -1.956525 | -0.697316 |
| H 0 | -2.878794 | -0.554780 | -0.281035 |
| H 0 | -1.292806 | 1.708734  | -0.977062 |
| H 0 | 0.111464  | 1.979914  | 0.068613  |
| H 0 | -1.503341 | 1.705120  | 0.755334  |

## 7

### B3LYP/6-31G(d) Geometry

|      |           |           |           |
|------|-----------|-----------|-----------|
| C 0  | -1.678937 | -0.578327 | -0.000123 |
| C 0  | -0.367844 | -0.872593 | 0.000070  |
| B 0  | 0.752845  | 0.184175  | 0.000015  |
| Cl 0 | 2.445435  | -0.330512 | -0.000069 |
| Cl 0 | 0.416321  | 1.922528  | -0.000004 |
| H 0  | -2.445435 | -1.350530 | -0.000028 |
| H 0  | -2.032641 | 0.449920  | -0.000349 |
| H 0  | -0.074715 | -1.922528 | 0.000349  |

## 8

### B3LYP/6-31G(d) Geometry

|      |           |           |           |
|------|-----------|-----------|-----------|
| C 0  | -0.743368 | 0.904563  | -0.000039 |
| C 0  | -0.241089 | -0.335134 | 0.000001  |
| C 0  | 1.228201  | -0.564699 | 0.000008  |
| O 0  | 1.769740  | -1.645474 | -0.000058 |
| Cl 0 | -1.252427 | -1.756097 | -0.000014 |
| H 0  | -1.808934 | 1.104342  | -0.000113 |
| H 0  | -0.067815 | 1.756097  | -0.000036 |
| H 0  | 1.808934  | 0.383244  | 0.000113  |

## 9

### B3LYP/6-31G(d) Geometry

|     |           |           |           |
|-----|-----------|-----------|-----------|
| C 0 | -0.160928 | 0.005279  | -0.000198 |
| C 0 | -1.188319 | -0.857031 | -0.000257 |
| C 0 | 1.211939  | -0.555784 | -0.000352 |
| O 0 | 2.223526  | 0.119192  | -0.000258 |
| C 0 | -0.288495 | 1.503362  | 0.000005  |
| H 0 | -2.223526 | -0.526916 | -0.000161 |
| H 0 | -1.019790 | -1.931982 | -0.000411 |
| H 0 | 1.264294  | -1.667335 | -0.000462 |
| H 0 | 0.210339  | 1.931763  | 0.876803  |
| H 0 | 0.210136  | 1.931982  | -0.876803 |
| H 0 | -1.336171 | 1.816512  | 0.000162  |

## 10

### B3LYP/6-31G(d) Geometry

|     |           |           |           |
|-----|-----------|-----------|-----------|
| C 0 | -0.367643 | 0.482957  | -0.000127 |
| C 0 | 0.538440  | -0.507823 | -0.000082 |
| C 0 | -1.818880 | 0.204357  | -0.000191 |
| O 0 | -2.314681 | -0.908935 | -0.000062 |
| C 0 | 2.022464  | -0.333942 | -0.000070 |
| H 0 | -0.062189 | 1.528554  | -0.000112 |

|     |           |           |           |
|-----|-----------|-----------|-----------|
| H 0 | 0.155416  | -1.528554 | -0.000115 |
| H 0 | -2.469205 | 1.106223  | 0.000373  |
| H 0 | 2.469205  | -0.819257 | -0.878503 |
| H 0 | 2.315126  | 0.720599  | -0.000179 |
| H 0 | 2.469150  | -0.819056 | 0.878503  |

## 11

### B3LYP/6-31G(d) Geometry

|     |           |           |           |
|-----|-----------|-----------|-----------|
| C 0 | -0.576500 | -0.401357 | -0.000004 |
| C 0 | 0.503567  | 0.401724  | 0.000104  |
| C 0 | -1.936641 | 0.174458  | -0.000099 |
| O 0 | -2.946811 | -0.498206 | -0.000196 |
| C 0 | 1.845460  | -0.080845 | 0.000149  |
| N 0 | 2.946811  | -0.456747 | 0.000196  |
| H 0 | -0.493581 | -1.484607 | -0.000052 |
| H 0 | 0.384608  | 1.484607  | 0.000144  |
| H 0 | -1.977472 | 1.285793  | 0.000121  |

## 12

### B3LYP/6-31G(d) Geometry

|      |           |           |           |
|------|-----------|-----------|-----------|
| C 0  | -1.929749 | 0.859496  | -0.000446 |
| C 0  | -1.150967 | -0.233834 | -0.000417 |
| C 0  | 0.300863  | -0.088670 | -0.000348 |
| O 0  | 1.075641  | -1.048273 | -0.000373 |
| Cl 0 | -1.800101 | -1.847569 | -0.000427 |
| H 0  | -3.011937 | 0.797242  | -0.000466 |
| H 0  | -1.478433 | 1.847569  | -0.000427 |
| H 0  | 0.705342  | 0.931735  | -0.000394 |
| B 0  | 2.681780  | -0.877838 | -0.000475 |
| H 0  | 3.011937  | -1.457276 | -1.007808 |
| H 0  | 3.011899  | -1.455630 | 1.007808  |
| H 0  | 2.870395  | 0.321072  | -0.001456 |

## 13

### B3LYP/6-31G(d) Geometry

|     |           |           |           |
|-----|-----------|-----------|-----------|
| C 0 | 2.076074  | -0.948331 | -0.000277 |
| C 0 | 1.157284  | 0.035788  | -0.000271 |
| C 0 | -0.239957 | -0.376253 | -0.000322 |
| O 0 | -1.164404 | 0.450596  | -0.000335 |
| C 0 | 1.468809  | 1.508016  | -0.000293 |
| H 0 | 3.141455  | -0.737377 | -0.000230 |
| H 0 | 1.786149  | -1.996052 | -0.000347 |
| H 0 | -0.488742 | -1.445509 | -0.000362 |
| H 0 | 2.547934  | 1.681153  | -0.000071 |
| H 0 | 1.032398  | 1.996052  | 0.878131  |
| H 0 | 1.032797  | 1.995854  | -0.879020 |
| B 0 | -2.718297 | 0.035882  | -0.000260 |
| H 0 | -3.141455 | 0.553080  | -1.008198 |
| H 0 | -3.141164 | 0.552316  | 1.008198  |
| H 0 | -2.727117 | -1.178521 | -0.000713 |

## 14

### B3LYP/6-31G(d) Geometry

|     |           |           |           |
|-----|-----------|-----------|-----------|
| C 0 | 1.737668  | 0.388940  | -0.000084 |
| C 0 | 0.634792  | -0.386431 | -0.000094 |
| C 0 | -0.677518 | 0.210941  | -0.000111 |
| O 0 | -1.713577 | -0.474431 | -0.000109 |
| B 0 | -3.183116 | 0.168144  | -0.000082 |
| C 0 | 3.145082  | -0.105693 | -0.000094 |
| H 0 | 1.605801  | 1.472246  | -0.000098 |
| H 0 | 0.691484  | -1.472246 | -0.000089 |
| H 0 | -0.772344 | 1.305467  | -0.000126 |
| H 0 | -3.683634 | -0.275415 | 1.008074  |

H O -3.683765 -0.275634 -1.008074  
H O -3.011040 1.371473 -0.000222  
H O 3.198402 -1.197803 -0.000200  
H O 3.683762 0.273201 0.878730  
H O 3.683765 0.273377 -0.878836

### 15

B3LYP/6-31G(d) Geometry

C O 1.463277 0.410620 -0.000291  
C O 0.390098 -0.410591 -0.000179  
C O -0.947105 0.143828 0.000091  
O O -1.943882 -0.594211 -0.000268  
B O -3.442457 -0.043725 -0.000333  
C O 2.805929 -0.062153 -0.000252  
N O 3.910369 -0.429368 -0.000241  
H O 1.335738 1.491871 -0.000253  
H O 0.490127 -1.491871 -0.000165  
H O -1.089465 1.232315 -0.000372  
H O -3.909916 -0.532503 1.003230  
H O -3.910369 -0.533363 -1.003230  
H O -3.348165 1.165268 -0.000776

### 16

B3LYP/6-31G(d) Geometry

C O 0.000000 1.076165 0.000001  
C O 0.000000 -0.270489 0.000000  
C O -1.225646 -1.024562 0.000000  
C O 1.225646 -1.024562 0.000000  
N O -2.216346 -1.631602 0.000000  
N O 2.216346 -1.631602 -0.000002  
H O 0.931606 1.631602 0.000001  
H O -0.931606 1.631602 0.000002

### 17

B3LYP/6-31G(d) Geometry

C O 0.674101 0.582569 0.000001  
C O -0.674153 0.582574 -0.000001  
C O 1.479665 -0.593689 0.000002  
C O -1.479691 -0.593695 -0.000002  
N O -2.171080 -1.529363 -0.000003  
N O 2.171080 -1.529339 0.000003  
H O 1.207034 1.529363 0.000002  
H O -1.207081 1.529363 -0.000002

### 18

B3LYP/6-31G(d) Geometry

C O -0.006832 -0.673929 0.000000  
C O 0.006832 0.673929 0.000000  
C O -1.221649 -1.420569 0.000001  
N O -2.200462 -2.049553 0.000002  
C O 1.221649 1.420569 -0.000001  
N O 2.200462 2.049553 -0.000002  
H O 0.918804 -1.243808 -0.000001  
H O -0.918804 1.243808 0.000001

### 19

B3LYP/6-31G(d) Geometry

C O 0.776801 -0.443001 -0.000008  
C O -0.238876 0.435386 -0.000132  
C O 2.223719 -0.063140 -0.000313  
C O -1.610361 0.034830 -0.000201  
N O -2.733479 -0.271194 -0.000301  
H O 0.546869 -1.507513 -0.000175

H O -0.052469 1.507513 -0.000264  
H O 2.733479 -0.476447 0.879947  
H O 2.732926 -0.478336 -0.879947  
H O 2.360538 1.022525 -0.001375

### 20

B3LYP/6-31G(d) Geometry

C O -0.928811 1.106794 -0.000882  
C O -0.369432 -0.112096 -0.000937  
C O 1.065274 -0.231080 -0.000840  
C O -1.145468 -1.408625 -0.000888  
N O 2.220871 -0.366068 -0.000914  
H O -2.008918 1.220880 -0.000969  
H O -0.330887 2.012105 -0.000789  
H O -0.898989 -2.012105 -0.882149  
H O -0.901344 -2.010474 0.882149  
H O -2.220871 -1.210999 -0.002495

### 21

B3LYP/6-31G(d) Geometry

C O -0.396227 0.366576 -0.000296  
C O 0.698066 -0.399583 -0.000467  
C O -1.746825 -0.236336 -0.000243  
O O -2.770824 0.414936 -0.000471  
C O 2.096089 0.140752 -0.000390  
F O 2.770281 -0.291046 1.087633  
F O 2.129679 1.485975 -0.001049  
F O 2.770824 -0.292129 -1.087633  
H O -0.339360 1.451354 -0.000230  
H O 0.637050 -1.485975 -0.000576  
H O -1.767411 -1.348194 -0.000426

### 22

B3LYP/6-31G(d) Geometry

C O 1.359708 0.184694 -0.033546  
C O 0.278572 -0.618918 -0.063596  
B O -1.197763 -0.127595 -0.058292  
C O -2.354142 -1.210102 -0.041952  
C O -1.597714 1.403950 -0.046200  
C O 2.791800 -0.258488 -0.041277  
H O 1.210618 1.265322 -0.000873  
H O 0.478450 -1.695326 -0.096395  
H O -2.499983 -1.529777 1.004103  
H O -2.105995 -2.122944 -0.598780  
H O -3.325897 -0.839111 -0.389027  
H O -2.083760 1.647658 -1.004103  
H O -0.784231 2.122944 0.099146  
H O -2.363279 1.598069 0.718633  
H O 3.325897 0.158935 -0.906270  
H O 2.880614 -1.349102 -0.073277  
H O 3.319401 0.107075 0.850728

### 23

B3LYP/6-31G(d) Geometry

C O -0.983465 0.160587 -0.000368  
C O 0.127003 -0.605044 -0.000380  
B O 1.555314 -0.051216 -0.000349  
C O -2.391142 -0.344614 -0.000320  
Cl O 2.934835 -1.164098 -0.000328  
Cl O 1.908132 1.688760 -0.000336  
H O -0.869649 1.245223 -0.000351  
H O 0.000021 -1.688760 -0.000413  
H O -2.934416 0.028809 0.878510

H O -2.436792 -1.437746 -0.000814  
H O -2.934835 0.029673 -0.878510

#### 24

B3LYP/6-31G(d) Geometry

C O -0.495139 0.441844 -0.000922  
C O 0.495149 -0.441842 0.001119  
N O -1.884072 -0.019242 -0.000382  
N O 1.884080 0.019255 0.000001  
O O -2.732292 0.869348 -0.001796  
O O -2.098789 -1.229074 0.001285  
O O 2.732292 -0.869337 -0.002902  
O O 2.098781 1.229087 0.001933  
H O -0.379425 1.516538 -0.002840  
H O 0.379447 -1.516538 0.002902

#### 25

B3LYP/6-31G(d) Geometry

C O 0.399057 -0.765386 0.000576  
C O -0.947071 -0.753640 0.000435  
C O 1.321262 0.387851 0.000317  
C O -1.988301 0.341541 0.000064  
O O -3.154705 0.004595 -0.000181  
O O -1.624711 1.622650 0.000049  
O O 1.027534 1.577845 0.000638  
O O 2.603093 -0.015404 -0.000461  
H O 0.902290 -1.727817 0.000682  
H O -1.441346 -1.721098 0.000510  
H O -0.640093 1.727817 0.000460  
H O 3.154705 0.790191 -0.000682

#### 26

B3LYP/6-31G(d) Geometry

C O -0.480377 -1.212755 0.000003  
C O 0.517353 -0.290491 0.000002  
C O -1.860736 -0.877683 0.000002  
C O 0.270411 1.121846 -0.000001  
C O 1.888977 -0.710118 0.000000  
N O 0.087326 2.269541 -0.000003  
N O -3.000688 -0.643175 0.000002  
N O 3.000688 -1.049467 -0.000002  
H O -0.228890 -2.269541 0.000003

#### 27

B3LYP/6-31G(d) Geometry

C O 1.791899 0.413694 -0.000191  
C O 0.638145 -0.540013 -0.000315  
C O -0.670590 -0.223767 -0.000301  
C O -1.080456 1.154307 -0.000162  
C O -1.786301 -1.244985 -0.000201  
N O -1.447160 2.259232 -0.000283  
H O 2.427157 0.248330 0.879993  
H O 1.465531 1.457121 0.000029  
H O 2.427189 0.248654 -0.880415  
H O 0.887874 -1.600896 -0.000408  
H O -2.426620 -1.129412 0.882184  
H O -2.427189 -1.129343 -0.882184  
H O -1.376678 -2.259232 -0.000361

#### 28

B3LYP/6-31G(d) Geometry

C O 0.241792 0.009764 -0.000347  
C O -0.757603 -0.895048 -0.000295  
C O 1.594028 -0.481741 -0.000369

C O -2.231210 -0.629821 -0.000407  
N O 2.700350 -0.843797 -0.000410  
C O 0.109014 1.516240 -0.000368  
H O -0.474772 -1.946507 -0.000279  
H O -2.700223 -1.090783 -0.879867  
H O -2.700350 -1.090566 0.879068  
H O -2.482344 0.433154 -0.000589  
H O 0.597676 1.946465 0.881612  
H O -0.935617 1.832887 -0.001115  
H O 0.598958 1.946507 -0.881612

#### 29

B3LYP/6-31G(d) Geometry

C O 0.469050 -0.907124 -0.000604  
C O -0.512988 0.023907 -0.000625  
C O 1.853976 -0.571270 -0.000565  
C O -1.874333 -0.431404 -0.000623  
C O -0.300297 1.515074 -0.000594  
N O -2.989788 -0.761897 -0.000531  
N O 2.989788 -0.316018 -0.000568  
H O 0.227369 -1.965952 -0.000580  
H O -0.770317 1.965952 -0.882085  
H O -0.768352 1.965757 0.882085  
H O 0.764155 1.759011 -0.001639

#### 30

B3LYP/6-31G(d) Geometry

C O 0.801020 -0.384214 -0.000137  
C O -0.395813 -1.013254 -0.000109  
C O 2.114584 -1.124073 -0.000276  
C O 0.878817 1.048664 -0.000215  
C O -1.657557 -0.351646 -0.000207  
N O -2.707482 0.150294 -0.000288  
N O 1.005082 2.204939 -0.000184  
H O -0.425440 -2.099800 -0.000003  
H O 2.707482 -0.854797 -0.881957  
H O 2.707186 -0.855977 0.881957  
H O 1.952612 -2.204939 -0.001064

#### 31

B3LYP/6-31G(d) Geometry

C O -0.362735 -0.553473 0.000126  
C O 0.900007 -0.073088 0.000135  
C O -1.599918 0.234478 -0.000206  
O O -2.711076 -0.269777 0.000330  
C O 2.074216 -1.017634 0.000128  
C O 1.273592 1.387762 0.000211  
H O -0.526163 -1.629669 0.000380  
H O -1.494211 1.339279 -0.000197  
H O 2.708715 -0.847080 -0.880553  
H O 2.711076 -0.844503 0.878571  
H O 1.760369 -2.064889 0.002007  
H O 1.892552 1.617503 -0.877491  
H O 0.418445 2.064889 -0.002061  
H O 1.888500 1.618358 0.880553

#### 32

B3LYP/6-31G(d) Geometry

C O -0.536679 -1.073087 0.000108  
C O 0.658565 -0.432366 0.000288  
C O -1.842743 -0.373299 -0.000424  
O O -2.889624 -0.987707 0.000324  
C O 1.892731 -1.164852 0.000424

C O 0.773902 1.001286 0.000135  
N O 2.889624 -1.762764 -0.000142  
N O 0.882467 2.158587 0.000112  
H O -0.568494 -2.158587 0.000254  
H O -1.810079 0.732926 0.000231

### 33

B3LYP/6-31G(d) Geometry

C O 0.686052 0.000003 0.000000  
C O -0.686052 -0.000003 0.000000  
C O 1.433147 1.219348 -0.000001  
C O 1.433158 -1.219336 0.000000  
N O 2.059033 2.199271 -0.000002  
C O -1.433147 -1.219348 0.000000  
C O -1.433158 1.219336 -0.000001  
N O -2.059033 -2.199271 0.000002  
N O 2.059051 -2.199254 0.000002  
N O -2.059051 2.199254 -0.000002

### 34

B3LYP/6-31G(d) Geometry

C O 0.516511 0.115579 -0.000830  
C O -0.525299 -0.767591 -0.000865  
C O 1.875666 -0.341349 -0.000834  
C O 0.323670 1.536065 -0.000792  
C O -1.866649 -0.268915 -0.000857  
C O -0.366852 -2.262722 -0.000769  
N O -2.978494 0.073569 -0.000845  
N O 2.978494 -0.710112 -0.000855  
N O 0.188849 2.690715 -0.000772  
H O -0.856914 -2.690294 0.881728  
H O -0.859266 -2.690715 -0.881728  
H O 0.685066 -2.553618 -0.002036

### 35

B3LYP/6-31G(d) Geometry

C O 0.516753 -0.445887 -0.000894  
C O -0.765809 0.018857 -0.000806  
C O 1.648414 0.531400 -0.000882  
O O 2.805416 0.165447 -0.000974  
C O 0.881556 -1.895180 -0.000808  
C O -1.892711 -0.870296 -0.000459  
C O -1.092556 1.419702 -0.000551  
N O -2.805416 -1.590932 0.000019  
N O -1.381600 2.545997 -0.000404  
H O 1.377126 1.603136 -0.000753  
H O 1.500689 -2.119339 0.875531  
H O 0.005792 -2.545997 -0.002100  
H O 1.503107 -2.118832 -0.875531

### 36

B3LYP/6-31G(d) Geometry

C O -0.393535 0.285839 -0.000197  
C O 0.915210 -0.080029 -0.000190  
C O -1.480635 -0.717674 -0.000189  
O O -2.669204 -0.438012 -0.000075  
C O 2.023670 0.943673 -0.000112  
C O -0.856992 1.729162 -0.000159  
C O 1.440444 -1.497164 -0.000128  
H O -1.179110 -1.781667 -0.000293  
H O 2.669204 0.806068 0.878526  
H O 2.669064 0.806337 -0.878892  
H O 1.663839 1.973114 0.000068

H O -1.948530 1.751844 -0.000392  
H O -0.504946 2.272696 0.884307  
H O -0.504507 2.272912 -0.884307  
H O 2.080296 -1.657175 -0.878527  
H O 2.080048 -1.657174 0.878460  
H O 0.675609 -2.272912 -0.000227

### 37

B3LYP/6-31G(d) Geometry

C O 1.581562 0.030693 -0.000358  
C O 0.398592 -0.662081 -0.000373  
C O -0.849508 0.097751 -0.000386  
O O -1.934385 -0.504987 -0.000405  
B O -3.352829 0.212719 -0.000302  
C O 2.845626 -0.644170 -0.000342  
C O 1.651008 1.464208 -0.000361  
N O 1.723044 2.624917 -0.000362  
N O 3.873633 -1.188332 -0.000328  
C O 0.310405 -2.157533 -0.000368  
H O -0.844132 1.192919 -0.000385  
H O -3.873107 -0.232474 0.999186  
H O -3.873633 -0.233207 -0.999186  
H O -3.129383 1.401478 -0.000799  
H O 1.296100 -2.624917 -0.000374  
H O -0.250026 -2.498883 -0.878053  
H O -0.250016 -2.498876 0.877327

### 38

B3LYP/6-31G(d) Geometry

C O 0.506350 -0.452764 -0.000653  
C O -0.506473 0.452680 -0.000762  
C O 1.861303 0.018659 -0.000927  
C O 0.337242 -1.952363 -0.000423  
C O -1.861381 -0.018909 -0.000734  
C O -0.337738 1.952260 -0.000424  
N O -2.975188 -0.357001 -0.001051  
N O 2.975188 0.356508 -0.000957  
H O 0.817778 -2.390058 0.882134  
H O -0.718519 -2.231047 -0.000940  
H O 0.818791 -2.390597 -0.882157  
H O -0.819282 2.390597 -0.882135  
H O -0.818510 2.389651 0.882157  
H O 0.717989 2.231085 -0.000782

### 39

B3LYP/6-31G(d) Geometry

C O -0.679613 0.035056 -0.000001  
C O 0.679638 0.035056 -0.000013  
C O -1.570865 1.253567 -0.000027  
C O -1.389138 -1.213570 -0.000005  
C O 1.389163 -1.213570 -0.000012  
C O 1.570890 1.253567 0.000007  
N O 2.028466 -2.185693 -0.000025  
N O -2.028442 -2.185693 0.000006  
H O -2.222850 1.243252 -0.881188  
H O -2.222797 1.243348 0.881174  
H O -1.005396 2.185692 -0.000090  
H O 2.222850 1.243273 0.881188  
H O 2.222849 1.243325 -0.881174  
H O 1.005423 2.185693 0.000031

#### 40

##### B3LYP/6-31G(d) Geometry

C O 0.757140 -0.375101 -0.000331  
C O -0.416532 0.302329 -0.000334  
C O 2.107758 0.291688 -0.000380  
C O -1.654512 -0.429899 -0.000346  
C O -0.610240 1.805109 -0.000294  
N O -2.684918 -0.972817 -0.000373  
C O 0.818427 -1.881731 -0.000300  
H O 2.684918 -0.026464 0.878262  
H O 2.684423 -0.025542 -0.879676  
H O 2.067677 1.381542 0.000253  
H O -1.182637 2.119069 -0.881234  
H O -1.181657 2.119203 0.881234  
H O 0.336172 2.347370 -0.000913  
H O 1.369903 -2.240161 -0.879937  
H O 1.369016 -2.240155 0.879914  
H O -0.169132 -2.347370 -0.000749

#### 41

##### B3LYP/6-31G(d) Geometry

C O -1.080328 0.099471 -0.000422  
C O -0.122249 -0.851121 0.000161  
C O -0.140993 1.300360 -0.000213  
C O 0.960269 0.180698 -0.000219  
O O 2.164262 0.187044 -0.000251  
H O -2.164262 0.044278 -0.000098  
H O -0.131331 -1.936159 -0.001151  
H O -0.158176 1.935606 0.893359  
H O -0.158052 1.936159 -0.893359

#### 42

##### B3LYP/6-31G(d) Geometry

C O 0.357429 -1.023383 -0.000414  
C O -0.267620 0.176573 -0.000260  
C O 1.787160 -0.491820 -0.000111  
C O 1.050782 0.889841 -0.000149  
O O 1.411983 2.040596 -0.000376  
C O -1.676696 0.661009 -0.000190  
H O -0.023239 -2.040596 -0.000756  
H O 2.390065 -0.697884 -0.892929  
H O 2.389684 -0.698035 0.892929  
H O -1.872103 1.286030 0.879808  
H O -2.390065 -0.169198 0.000081  
H O -1.872255 1.285748 -0.880336

#### 43

##### B3LYP/6-31G(d) Geometry

C O -0.673819 0.130086 0.000022  
C O 0.264788 -0.847845 -0.000106  
C O 0.319412 1.295548 -0.000028  
C O 1.375298 0.138272 -0.000008  
O O 2.581231 0.105223 0.000318  
C O -2.159639 0.144287 0.000257  
H O 0.216696 -1.932603 0.000043  
H O 0.322386 1.932527 0.893373  
H O 0.322175 1.932603 -0.893373  
H O -2.538988 0.682165 0.879493  
H O -2.581231 -0.865237 0.000336  
H O -2.539254 0.682131 -0.878879

#### 44

##### B3LYP/6-31G(d) Geometry

C O 0.331489 0.142729 -0.000189  
C O -0.588808 -0.853628 -0.000256  
C O -0.668806 1.305886 -0.000146  
C O -1.711847 0.136740 -0.000188  
O O -2.912396 0.084361 -0.000171  
C O 1.748332 0.142883 -0.000323  
N O 2.912396 0.171392 -0.000094  
H O -0.520282 -1.935855 0.000282  
H O -0.671111 1.935855 -0.895744  
H O -0.670912 1.935429 0.895744

#### 45

##### B3LYP/6-31G(d) Geometry

C O 0.187078 -1.061336 -0.000103  
C O -0.501709 0.098284 -0.000088  
C O 1.564736 -0.404586 -0.000041  
C O 0.744815 0.931737 -0.000096  
O O 1.016690 2.099774 -0.000078  
Cl O -2.177046 0.500168 -0.000062  
H O -0.121305 -2.099774 -0.000109  
H O 2.177046 -0.561387 -0.895420  
H O 2.176940 -0.561345 0.895420

#### 46

##### B3LYP/6-31G(d) Geometry

C O 0.330440 -0.508921 0.000078  
C O -0.643960 0.441947 0.000090  
C O 1.743655 -0.415281 0.000057  
C O -0.597900 -1.728609 0.000021  
C O -1.703417 -0.623688 0.000053  
C O -0.685900 1.926485 0.000018  
O O -2.906828 -0.633823 0.000035  
N O 2.906828 -0.350865 0.000029  
H O -0.566317 -2.359065 0.895123  
H O -0.566279 -2.359005 -0.895123  
H O -1.228174 2.293638 -0.879904  
H O -1.227254 2.293504 0.880554  
H O 0.318731 2.359065 -0.000513

#### 47

##### B3LYP/6-31G(d) Geometry

C O -0.682289 -0.519978 -0.000067  
C O 0.280828 0.439351 -0.000097  
C O 0.274099 -1.713871 -0.000036  
C O 1.358285 -0.588187 -0.000107  
O O 2.566438 -0.581488 -0.000108  
C O -2.168927 -0.491632 -0.000126  
C O 0.304172 1.930232 -0.000067  
H O 0.260716 -2.352289 -0.892915  
H O 0.260745 -2.352165 0.892915  
H O -2.566438 -1.016495 -0.879379  
H O -2.562517 0.529826 -0.000654  
H O -2.566371 -1.015476 0.879779  
H O -0.706574 2.352289 -0.000678  
H O 0.835566 2.312774 -0.880173  
H O 0.834401 2.312724 0.880759

#### 48

##### B3LYP/6-31G(d) Geometry

C O 0.029089 1.022968 -0.000727  
C O -1.266966 0.677733 -0.001529  
C O 0.883784 -0.188844 -0.002108  
O O 2.099053 -0.230088 -0.002127



C O -0.060214 -1.405460 -0.000261  
C O -1.486351 -0.817741 -0.002374  
H O 0.440257 2.026293 0.000224  
H O -2.099053 1.377284 -0.001364  
H O 0.147908 -2.021892 0.880796  
H O 0.149478 -2.026293 -0.877767  
H O -2.072755 -1.126105 0.873456  
H O -2.069411 -1.125127 -0.880796

#### 49

B3LYP/6-31G(d) Geometry

C O 0.507946 -0.217595 -0.000012  
C O -0.491212 -1.117085 -0.000019  
C O -0.072904 1.152586 -0.000015  
O O 0.555736 2.195555 -0.000027  
C O -1.602275 1.017123 -0.000010  
C O -1.870717 -0.501883 -0.000024  
C O 1.987893 -0.435129 -0.000017  
H O -0.348378 -2.195555 -0.000029  
H O -2.012382 1.526252 -0.878875  
H O -2.012370 1.526226 0.878875  
H O -2.446442 -0.827264 -0.876908  
H O -2.446458 -0.827283 0.876843  
H O 2.244136 -1.498862 -0.000147  
H O 2.446445 0.036526 0.877309  
H O 2.446458 0.036747 -0.877215

#### 50

B3LYP/6-31G(d) Geometry

C O -0.295999 -0.873861 -0.000914  
C O 0.744026 -0.018992 -0.000911  
C O -1.582060 -0.149479 -0.000769  
O O -2.700522 -0.630044 -0.000759  
C O 2.198734 -0.366283 -0.000564  
C O -1.252807 1.354645 -0.000500  
C O 0.286201 1.428731 -0.001056  
H O -0.238456 -1.957256 -0.000983  
H O 2.362220 -1.447672 -0.001337  
H O 2.699575 0.059532 0.879528  
H O 2.700522 0.060835 -0.879528  
H O -1.705712 1.824369 0.879112  
H O -1.706595 1.825065 -0.879285  
H O 0.685551 1.957256 0.875380  
H O 0.684748 1.956668 -0.878215

#### 51

B3LYP/6-31G(d) Geometry

C O 0.547204 -0.926886 -0.000102  
C O -0.397519 0.034343 -0.000442  
C O 1.898178 -0.309501 -0.000457  
O O 2.958665 -0.899834 -0.000749  
C O -1.805063 -0.195367 -0.000487  
C O 1.703687 1.215553 -0.000353  
C O 0.179777 1.443387 -0.000498  
N O -2.958665 -0.349484 -0.000602  
H O 0.383450 -1.997755 0.000446  
H O 2.197983 1.641045 -0.879745  
H O 2.197355 1.640388 0.879745  
H O -0.170335 1.997755 -0.878966  
H O -0.170347 1.997612 0.878121

#### 52

B3LYP/6-31G(d) Geometry

C O 0.531373 -0.134335 -0.001327  
C O -0.238853 -1.232022 -0.001657  
C O -0.290997 1.109869 -0.001437  
O O 0.111630 2.251889 -0.002245  
C O -1.754495 0.648441 -0.000263  
C O -1.709866 -0.895836 -0.002013  
Cl O 2.261343 -0.071868 -0.001157  
H O 0.132335 -2.251889 -0.001837  
H O -2.261343 1.062256 -0.878246  
H O -2.258514 1.059756 0.880572  
H O -2.206256 -1.328174 -0.880572  
H O -2.207522 -1.330455 0.874677

#### 53

B3LYP/6-31G(d) Geometry

C O -0.544823 0.512649 -0.000574  
C O 0.391589 -0.464164 -0.000756  
C O -1.894693 -0.124133 -0.000607  
O O -2.951383 0.476017 -0.000640  
C O 1.798865 -0.237021 -0.000834  
C O -1.708090 -1.645293 -0.000377  
C O -0.184417 -1.872617 -0.000661  
C O -0.376484 1.994124 -0.000483  
N O 2.951383 -0.070953 -0.000335  
H O -2.203364 -2.071107 -0.879318  
H O -2.202719 -2.070368 0.879318  
H O 0.162247 -2.429361 -0.879136  
H O 0.162405 -2.429115 0.877951  
H O -0.869050 2.429245 -0.878107  
H O 0.676101 2.288284 0.000598  
H O -0.870850 2.429361 0.876071

#### 54

B3LYP/6-31G(d) Geometry

C O 0.313624 0.432501 -0.000261  
C O -0.745546 -0.407010 -0.000351  
C O 1.573096 -0.350314 -0.000234  
O O 2.701595 0.110648 -0.000327  
C O -2.199920 -0.054218 -0.000219  
C O 1.210455 -1.840272 -0.000128  
C O -0.328107 -1.866912 -0.000401  
C O 0.363963 1.928734 -0.000279  
H O -2.372896 1.025076 -0.000381  
H O -2.701180 -0.480913 0.879481  
H O -2.701595 -0.481331 -0.879481  
H O 1.650481 -2.323198 0.879077  
H O 1.650867 -2.323456 -0.878997  
H O -0.741209 -2.385029 0.876201  
H O -0.740850 -2.384835 -0.877290  
H O 0.911938 2.292438 0.877200  
H O -0.629826 2.385029 -0.001498  
H O 0.914110 2.292243 -0.876468

#### 55

B3LYP/6-31G(d) Geometry

C O 0.667837 0.699048 0.000011  
C O -0.667835 0.699048 0.000009  
C O -1.131998 -0.718114 0.000003  
C O 1.132001 -0.718113 -0.000003  
O O 0.000001 -1.530918 -0.000308  
O O -2.245530 -1.159453 0.000306

|   |   |           |           |          |
|---|---|-----------|-----------|----------|
| O | 0 | 2.245530  | -1.159454 | 0.000308 |
| H | 0 | 1.360262  | 1.530919  | 0.000098 |
| H | 0 | -1.360258 | 1.530919  | 0.000094 |

### 56

B3LYP/6-31G(d) Geometry

|   |   |           |           |           |
|---|---|-----------|-----------|-----------|
| C | 0 | -1.245993 | -1.256638 | -0.000008 |
| O | 0 | 0.129629  | -1.644061 | 0.000003  |
| C | 0 | 0.931210  | -0.519436 | -0.000107 |
| C | 0 | 0.034749  | 0.665063  | 0.000017  |
| C | 0 | -1.231841 | 0.245329  | -0.000052 |
| O | 0 | 2.133364  | -0.580492 | -0.000007 |
| H | 0 | -1.735935 | -1.676880 | 0.888044  |
| H | 0 | -1.735923 | -1.676926 | -0.888044 |
| H | 0 | 0.417451  | 1.676926  | 0.000085  |
| H | 0 | -2.133364 | 0.847990  | -0.000075 |

### 57

B3LYP/6-31G(d) Geometry

|   |   |           |           |           |
|---|---|-----------|-----------|-----------|
| C | 0 | 0.769740  | 1.231121  | 0.061837  |
| C | 0 | -0.571668 | 1.194630  | -0.014792 |
| C | 0 | 1.628166  | -0.001284 | 0.168380  |
| C | 0 | 0.884894  | -1.258647 | -0.305918 |
| C | 0 | -0.519626 | -1.338325 | 0.308025  |
| C | 0 | -1.334371 | -0.072632 | 0.054720  |
| O | 0 | -2.552313 | -0.093308 | -0.044232 |
| H | 0 | 1.279893  | 2.194001  | 0.050441  |
| H | 0 | -1.165163 | 2.100347  | -0.110644 |
| H | 0 | 1.949176  | -0.120600 | 1.216465  |
| H | 0 | 2.552313  | 0.141066  | -0.406493 |
| H | 0 | 0.797199  | -1.225635 | -1.399960 |
| H | 0 | 1.461508  | -2.158113 | -0.061192 |
| H | 0 | -0.442170 | -1.460148 | 1.399960  |
| H | 0 | -1.089791 | -2.194001 | -0.066494 |

### 58

B3LYP/6-31G(d) Geometry

|   |   |           |           |           |
|---|---|-----------|-----------|-----------|
| C | 0 | 0.142426  | -1.363112 | -0.148025 |
| C | 0 | -0.869517 | -0.475291 | -0.080586 |
| C | 0 | 1.601699  | -0.997457 | -0.203485 |
| C | 0 | 1.856585  | 0.424236  | 0.312835  |
| C | 0 | 0.867800  | 1.411360  | -0.317249 |
| C | 0 | -0.582687 | 0.987240  | -0.113518 |
| O | 0 | -1.483144 | 1.810392  | -0.024711 |
| C | 0 | -2.319223 | -0.871500 | 0.006555  |
| H | 0 | -0.096000 | -2.427194 | -0.167528 |
| H | 0 | 1.955673  | -1.090905 | -1.243883 |
| H | 0 | 2.185743  | -1.728184 | 0.371021  |
| H | 0 | 1.731798  | 0.434997  | 1.403812  |
| H | 0 | 2.889251  | 0.729491  | 0.107698  |
| H | 0 | 1.040541  | 1.466540  | -1.403812 |
| H | 0 | 0.982304  | 2.427194  | 0.073383  |
| H | 0 | -2.434136 | -1.959823 | 0.008454  |
| H | 0 | -2.889251 | -0.456934 | -0.832780 |
| H | 0 | -2.778229 | -0.467557 | 0.916044  |

### 59

B3LYP/6-31G(d) Geometry

|   |   |           |           |           |
|---|---|-----------|-----------|-----------|
| C | 0 | -0.838000 | -0.591369 | 0.064230  |
| C | 0 | 0.240934  | -1.397619 | -0.011999 |
| C | 0 | -0.689664 | 0.909378  | 0.190378  |
| C | 0 | 0.673948  | 1.413200  | -0.300311 |

|   |   |           |           |           |
|---|---|-----------|-----------|-----------|
| C | 0 | 1.815707  | 0.588103  | 0.304580  |
| C | 0 | 1.631237  | -0.907235 | 0.063380  |
| O | 0 | 2.584571  | -1.668920 | -0.025352 |
| C | 0 | -2.240927 | -1.131156 | 0.044882  |
| H | 0 | 0.131469  | -2.475276 | -0.113427 |
| H | 0 | -0.837317 | 1.187048  | 1.247191  |
| H | 0 | -1.501613 | 1.405057  | -0.358472 |
| H | 0 | 0.710249  | 1.331649  | -1.394796 |
| H | 0 | 0.795305  | 2.475276  | -0.057660 |
| H | 0 | 1.848764  | 0.740908  | 1.394796  |
| H | 0 | 2.795254  | 0.880345  | -0.086055 |
| H | 0 | -2.259648 | -2.224066 | 0.007166  |
| H | 0 | -2.795254 | -0.743530 | -0.820884 |
| H | 0 | -2.794053 | -0.806364 | 0.937135  |

### 60

B3LYP/6-31G(d) Geometry

|   |   |           |           |           |
|---|---|-----------|-----------|-----------|
| C | 0 | -0.634557 | -0.361747 | 0.066288  |
| C | 0 | 0.285528  | -1.349126 | -0.008404 |
| C | 0 | -0.264297 | 1.105018  | 0.183273  |
| C | 0 | 1.166752  | 1.363216  | -0.306523 |
| C | 0 | 2.157659  | 0.365919  | 0.309302  |
| C | 0 | 1.743163  | -1.078367 | 0.063830  |
| O | 0 | 2.549326  | -1.989101 | -0.036147 |
| C | 0 | -2.032114 | -0.682830 | 0.048112  |
| N | 0 | -3.174233 | -0.906391 | 0.037226  |
| H | 0 | -0.004823 | -2.390853 | -0.107613 |
| H | 0 | -0.373472 | 1.407957  | 1.235745  |
| H | 0 | -0.984436 | 1.708414  | -0.380566 |
| H | 0 | 1.191276  | 1.271366  | -1.400113 |
| H | 0 | 1.461339  | 2.390853  | -0.067856 |
| H | 0 | 2.203836  | 0.509703  | 1.400113  |
| H | 0 | 3.174233  | 0.500175  | -0.071821 |

### 61

B3LYP/6-31G(d) Geometry

|    |   |           |           |           |
|----|---|-----------|-----------|-----------|
| C  | 0 | 0.304128  | -1.276330 | 0.166627  |
| C  | 0 | 1.073636  | -0.176588 | 0.104977  |
| C  | 0 | -1.199946 | -1.225476 | 0.204664  |
| C  | 0 | -1.744888 | 0.109906  | -0.316639 |
| C  | 0 | -0.999810 | 1.288125  | 0.320410  |
| C  | 0 | 0.512051  | 1.208490  | 0.124183  |
| O  | 0 | 1.208318  | 2.200578  | 0.033653  |
| Cl | 0 | 2.819852  | -0.301094 | 0.026191  |
| H  | 0 | 0.780413  | -2.253707 | 0.193814  |
| H  | 0 | -1.533070 | -1.395115 | 1.241662  |
| H  | 0 | -1.604070 | -2.064121 | -0.376170 |
| H  | 0 | -1.617231 | 0.147054  | -1.406236 |
| H  | 0 | -2.819852 | 0.186902  | -0.118855 |
| H  | 0 | -1.182213 | 1.302652  | 1.406236  |
| H  | 0 | -1.332855 | 2.253707  | -0.071310 |

### 62

B3LYP/6-31G(d) Geometry

|   |   |           |           |           |
|---|---|-----------|-----------|-----------|
| C | 0 | -0.635322 | -0.243818 | -0.105080 |
| C | 0 | 0.188580  | 0.835519  | -0.056427 |
| C | 0 | -0.152890 | -1.682820 | -0.177463 |
| C | 0 | 1.286050  | -1.826207 | 0.326507  |
| C | 0 | 2.191663  | -0.780137 | -0.329842 |
| C | 0 | 1.672135  | 0.634216  | -0.123685 |
| O | 0 | 2.424148  | 1.593420  | -0.050534 |
| C | 0 | -2.059150 | -0.069798 | -0.102579 |
| C | 0 | -0.276411 | 2.259669  | 0.042493  |

|     |           |           |           |
|-----|-----------|-----------|-----------|
| N O | -3.219826 | 0.023269  | -0.104292 |
| H O | -0.228933 | -2.026537 | -1.220530 |
| H O | -0.832841 | -2.319945 | 0.399182  |
| H O | 1.302031  | -1.692604 | 1.416046  |
| H O | 1.655482  | -2.837387 | 0.123821  |
| H O | 2.237791  | -0.956603 | -1.416046 |
| H O | 3.219826  | -0.819619 | 0.041819  |
| H O | -1.364945 | 2.333697  | 0.087086  |
| H O | 0.087610  | 2.837387  | -0.814548 |
| H O | 0.152797  | 2.733622  | 0.932096  |

### 63

#### B3LYP/6-31G(d) Geometry

|     |           |           |           |
|-----|-----------|-----------|-----------|
| C O | -0.957780 | -0.242460 | -0.120392 |
| C O | -0.103442 | 0.809163  | -0.059000 |
| C O | -0.483294 | -1.679107 | -0.185891 |
| C O | 0.947197  | -1.865291 | 0.323617  |
| C O | 1.870974  | -0.836180 | -0.328049 |
| C O | 1.370762  | 0.589305  | -0.128432 |
| O O | 2.162726  | 1.521583  | -0.068817 |
| C O | -2.454875 | -0.077654 | -0.136159 |
| C O | -0.550855 | 2.251253  | 0.044356  |
| H O | -0.557745 | -2.025890 | -1.230335 |
| H O | -1.179227 | -2.312852 | 0.380709  |
| H O | 0.962718  | -1.730416 | 1.413371  |
| H O | 1.296663  | -2.885009 | 0.123787  |
| H O | 1.921746  | -1.016979 | -1.413371 |
| H O | 2.896416  | -0.888236 | 0.050038  |
| H O | -2.772342 | 0.957585  | -0.273470 |
| H O | -2.892583 | -0.447461 | 0.802312  |
| H O | -2.896416 | -0.682124 | -0.940045 |
| H O | -1.260255 | 2.403576  | 0.865006  |
| H O | -1.036013 | 2.594052  | -0.878646 |
| H O | 0.321167  | 2.885009  | 0.215803  |

### 64

#### B3LYP/6-31G(d) Geometry

|     |           |           |           |
|-----|-----------|-----------|-----------|
| C O | 0.965632  | 0.961426  | -0.060977 |
| C O | -0.325963 | 1.283970  | 0.117837  |
| C O | -1.288168 | 0.226636  | 0.605534  |
| O O | -0.616121 | -0.666082 | 1.510866  |
| C O | 0.249988  | -1.354864 | 0.638939  |
| C O | 1.406612  | -0.425939 | 0.222420  |
| C O | -1.642662 | -0.768013 | -0.527705 |
| O O | -0.514955 | -1.646574 | -0.539407 |
| O O | 2.552082  | -0.819658 | 0.099947  |
| H O | 1.716119  | 1.669841  | -0.400160 |
| H O | -0.710052 | 2.275610  | -0.111501 |
| H O | -2.157231 | 0.642988  | 1.117725  |
| H O | 0.606852  | -2.275610 | 1.104286  |
| H O | -1.752150 | -0.301460 | -1.510866 |
| H O | -2.552082 | -1.327431 | -0.277256 |

### 65

#### B3LYP/6-31G(d) Geometry

|     |           |           |           |
|-----|-----------|-----------|-----------|
| C O | 1.041848  | -0.349696 | -0.267647 |
| C O | 0.065534  | -1.264419 | -0.421693 |
| C O | -1.352332 | -0.826067 | -0.694000 |
| O O | -1.353473 | 0.369173  | -1.496394 |
| C O | -0.856687 | 1.315538  | -0.581655 |
| C O | 0.649720  | 1.086325  | -0.368850 |
| C O | -2.027705 | -0.278304 | 0.587504  |
| O O | -1.514228 | 1.054050  | 0.667416  |

|     |           |           |           |
|-----|-----------|-----------|-----------|
| O O | 1.436437  | 2.008959  | -0.246672 |
| C O | 2.487792  | -0.658975 | -0.008601 |
| H O | 0.266875  | -2.329630 | -0.320492 |
| H O | -1.939755 | -1.585792 | -1.212687 |
| H O | -1.072384 | 2.329630  | -0.923505 |
| H O | -1.764541 | -0.826872 | 1.496394  |
| H O | -3.117901 | -0.253562 | 0.470027  |
| H O | 3.117901  | -0.264611 | -0.814199 |
| H O | 2.656691  | -1.736779 | 0.073302  |
| H O | 2.826804  | -0.173559 | 0.913634  |

### 66

#### B3LYP/6-31G(d) Geometry

|     |           |           |           |
|-----|-----------|-----------|-----------|
| C O | 0.255665  | 1.565237  | 0.044585  |
| C O | -0.761384 | 0.707938  | 0.261462  |
| C O | -0.405560 | -0.711991 | 0.666338  |
| O O | 0.771579  | -0.721828 | 1.487478  |
| C O | 1.770300  | -0.384590 | 0.551636  |
| C O | 1.652678  | 1.109609  | 0.197846  |
| C O | 0.106450  | -1.526056 | -0.547849 |
| O O | 1.480535  | -1.142154 | -0.631409 |
| O O | 2.630021  | 1.817378  | 0.026226  |
| C O | -2.210814 | 1.050397  | 0.085977  |
| H O | 0.095928  | 2.602409  | -0.239759 |
| H O | -1.210215 | -1.203346 | 1.218053  |
| H O | 2.758197  | -0.641562 | 0.938061  |
| H O | -0.400503 | -1.285644 | -1.487478 |
| H O | 0.030384  | -2.602409 | -0.351842 |
| H O | -2.342548 | 2.079373  | -0.259683 |
| H O | -2.758197 | 0.927223  | 1.030434  |
| H O | -2.689963 | 0.381504  | -0.642498 |

### 67

#### B3LYP/6-31G(d) Geometry

|     |           |           |           |
|-----|-----------|-----------|-----------|
| C O | 0.277784  | 1.582781  | 0.066101  |
| C O | -0.563476 | 0.552070  | 0.303008  |
| C O | 0.025037  | -0.802173 | 0.686674  |
| O O | 1.206259  | -0.598295 | 1.467445  |
| C O | 2.110458  | -0.099605 | 0.504888  |
| C O | 1.742237  | 1.359016  | 0.182975  |
| C O | 0.628070  | -1.508368 | -0.549052 |
| O O | 1.899254  | -0.865568 | -0.685106 |
| O O | 2.568555  | 2.231617  | -0.000424 |
| C O | -1.979656 | 0.662732  | 0.161156  |
| N O | -3.137713 | 0.706965  | 0.051903  |
| H O | -0.067588 | 2.576630  | -0.201006 |
| H O | -0.674768 | -1.411748 | 1.258941  |
| H O | 3.137713  | -0.200727 | 0.858911  |
| H O | 0.050201  | -1.374782 | -1.467445 |
| H O | 0.766117  | -2.576630 | -0.346655 |

### 68

#### B3LYP/6-31G(d) Geometry

|      |           |           |           |
|------|-----------|-----------|-----------|
| C O  | 1.176148  | -0.162286 | -0.348799 |
| C O  | 0.365865  | -1.221934 | -0.501856 |
| C O  | -1.110287 | -0.981382 | -0.718831 |
| O O  | -1.307873 | 0.218284  | -1.484119 |
| C O  | -0.930810 | 1.206463  | -0.558099 |
| C O  | 0.604569  | 1.218615  | -0.398948 |
| C O  | -1.809699 | -0.571560 | 0.600360  |
| O O  | -1.489737 | 0.819102  | 0.701758  |
| O O  | 1.244757  | 2.240458  | -0.282217 |
| Cl O | 2.895135  | -0.312445 | -0.109532 |



H O 0.737532 -2.240458 -0.438515  
H O -1.594145 -1.807524 -1.242004  
H O -1.306083 2.184271 -0.865121  
H O -1.437545 -1.096745 1.484119  
H O -2.895135 -0.701822 0.516837

### 69

B3LYP/6-31G(d) Geometry

C O 0.086023 0.953633 -0.265660  
C O 0.624540 -0.282193 -0.429093  
C O -0.284336 -1.476530 -0.700380  
O O -1.403074 -1.056597 -1.488943  
C O -2.127913 -0.281076 -0.562125  
C O -1.405380 1.057757 -0.357309  
C O -1.009474 -1.926889 0.587689  
O O -2.083973 -0.985777 0.683324  
O O -1.997694 2.113129 -0.232567  
C O 0.848534 2.215859 -0.009077  
C O 2.024524 -0.534785 -0.309167  
N O 3.157654 -0.786352 -0.214110  
H O 0.235204 -2.277390 -1.227388  
H O -3.157654 -0.146378 -0.897500  
H O -0.393064 -1.872469 1.488943  
H O -1.408184 -2.940903 0.468541  
H O 1.923995 2.037254 0.057680  
H O 0.500393 2.682484 0.919423  
H O 0.654440 2.940903 -0.807819

### 70

B3LYP/6-31G(d) Geometry

C O 0.818893 0.458831 -0.268690  
C O 0.372819 -0.811143 -0.414844  
C O -1.101989 -1.039303 -0.691428  
O O -1.641367 0.015372 -1.502018  
C O -1.630752 1.087482 -0.590658  
C O -0.183952 1.556464 -0.372173  
C O -1.950256 -0.853368 0.590735  
O O -2.122638 0.564417 0.651310  
O O 0.087341 2.740460 -0.255552  
C O 1.226347 -2.039883 -0.285036  
C O 2.251031 0.856519 -0.007964  
H O -1.283320 -1.987460 -1.203099  
H O -2.271815 1.897596 -0.942591  
H O -1.456175 -1.204345 1.502018  
H O -2.926039 -1.343252 0.487215  
H O 2.246236 -1.808881 0.028814  
H O 1.274820 -2.580062 -1.241108  
H O 0.797077 -2.740460 0.444951  
H O 2.926039 0.488130 -0.788916  
H O 2.611998 0.468012 0.952067  
H O 2.320847 1.946128 0.021118

### TS-1+CP

B3LYP/6-31G(d) Geometry

C O -1.766708 -0.619522 0.468826  
C O -1.697483 0.883239 0.267410  
C O -0.260552 1.135755 0.631032  
C O 0.143860 0.122713 1.491831  
C O -0.789568 -0.927274 1.433007  
H O -2.697828 -1.171655 0.375175  
H O -2.339642 1.357926 1.028552  
H O -2.016604 1.252559 -0.709546  
H O 0.242850 2.086827 0.499512  
H O 1.082773 0.096493 2.033117

H O -0.688225 -1.882288 1.937877  
C O -0.797936 -1.057146 -1.309704  
C O 0.215980 -0.100045 -1.457760  
C O 1.580166 -0.420578 -1.211790  
N O 2.697828 -0.689617 -1.012355  
H O -1.692538 -0.943513 -1.915529  
H O -0.519466 -2.086827 -1.113898  
H O 0.039223 0.802851 -2.033117

### TS-2+CP

B3LYP/6-31G(d) Geometry

C O -1.373958 -0.642538 0.831775  
C O -1.354097 0.873725 0.896396  
C O 0.127942 1.116989 0.980648  
C O 0.706834 -0.011694 1.553472  
C O -0.215716 -1.070826 1.508051  
H O -2.302143 -1.207159 0.840194  
H O -1.808198 1.176379 1.855562  
H O -1.882794 1.397543 0.098319  
H O 0.592785 2.093092 0.904542  
H O 1.736483 -0.088782 1.885693  
H O -0.010070 -2.093092 1.808720  
C O -0.775074 -0.731695 -1.150030  
C O 0.079616 0.358432 -1.357690  
C O 1.527188 0.199511 -1.461492  
O O 2.302143 1.042956 -1.885693  
H O -1.786782 -0.681980 -1.544316  
H O -0.349659 -1.731754 -1.165187  
H O -0.312474 1.312652 -1.699049  
H O 1.901508 -0.794621 -1.118937

### TS-3+CP

B3LYP/6-31G(d) Geometry

C O -3.004202 0.242332 -0.125773  
C O -2.691833 -0.219026 1.289668  
C O -1.572773 -1.183496 1.029774  
C O -1.669925 -1.626506 -0.279370  
C O -2.589436 -0.811504 -0.967967  
H O -3.884601 0.839751 -0.346830  
H O -3.562095 -0.792428 1.652173  
H O -2.487486 0.563129 2.022119  
H O -0.929747 -1.602434 1.794910  
H O -1.076652 -2.419955 -0.719936  
H O -2.832308 -0.897760 -2.022119  
C O -1.515639 1.573183 -0.329602  
C O -0.422794 1.143723 0.447095  
C O 0.673760 0.434858 -0.111645  
O O 1.713378 0.161227 0.535674  
B O 2.881990 -0.725372 -0.076962  
H O -2.088183 2.419955 0.041382  
H O -1.405436 1.575729 -1.410312  
H O -0.336545 1.432223 1.490392  
H O 0.619549 0.109563 -1.159348  
H O 2.891897 -1.719851 0.621188  
H O 2.569358 -0.944522 -1.235490  
H O 3.884601 -0.058257 0.048995

### TS-4+CP

B3LYP/6-31G(d) Geometry

C O 0.664121 -1.540860 0.169793  
C O 1.243835 -0.538388 0.975360  
C O 1.660914 0.528850 0.160034  
C O 0.767382 -1.165883 -1.156412

|   |   |           |           |           |
|---|---|-----------|-----------|-----------|
| C | 0 | 1.742557  | -0.026827 | -1.252985 |
| H | 0 | 0.126397  | -2.404306 | 0.543331  |
| H | 0 | 1.241065  | -0.534207 | 2.059642  |
| H | 0 | 2.330136  | 1.308838  | 0.512650  |
| H | 0 | 0.406957  | -1.735171 | -2.005521 |
| H | 0 | 2.754204  | -0.439514 | -1.401909 |
| H | 0 | 1.558680  | 0.686207  | -2.059642 |
| C | 0 | -0.911910 | 0.749053  | -0.894574 |
| C | 0 | -0.079131 | 1.564750  | -0.135730 |
| N | 0 | -1.907698 | -0.039913 | -0.245704 |
| O | 0 | -1.861560 | -0.139998 | 0.993757  |
| O | 0 | -2.754204 | -0.598970 | -0.956494 |
| H | 0 | -1.040758 | 0.794801  | -1.965527 |
| H | 0 | 0.386308  | 2.404306  | -0.644278 |
| H | 0 | -0.354577 | 1.737566  | 0.897356  |

#### TS-5+CP

B3LYP/6-31G(d) Geometry

|   |   |           |           |           |
|---|---|-----------|-----------|-----------|
| C | 0 | 1.051799  | -1.508201 | 0.223285  |
| C | 0 | 1.747635  | -0.541963 | 0.971016  |
| C | 0 | 2.073170  | 0.532921  | 0.137422  |
| C | 0 | 0.943486  | -1.067875 | -1.095622 |
| C | 0 | 1.968766  | 0.022541  | -1.282676 |
| H | 0 | 0.561405  | -2.383690 | 0.633510  |
| H | 0 | 1.884220  | -0.564744 | 2.047271  |
| H | 0 | 2.728723  | 1.349153  | 0.424721  |
| H | 0 | 0.531784  | -1.652647 | -1.910305 |
| H | 0 | 2.928925  | -0.450569 | -1.548923 |
| H | 0 | 1.742851  | 0.768641  | -2.047271 |
| C | 0 | 0.104987  | 1.506003  | -0.045564 |
| C | 0 | -0.621277 | 0.605030  | -0.814224 |
| C | 0 | -1.769148 | -0.149936 | -0.230420 |
| F | 0 | -1.589174 | -0.433679 | 1.080793  |
| F | 0 | -2.008483 | -1.323862 | -0.868574 |
| F | 0 | -2.928925 | 0.557585  | -0.319185 |
| H | 0 | 0.535188  | 2.383690  | -0.516463 |
| H | 0 | -0.108440 | 1.607107  | 1.011935  |
| H | 0 | -0.718943 | 0.755582  | -1.884976 |

#### TS-6+CP

B3LYP/6-31G(d) Geometry

|   |   |           |           |           |
|---|---|-----------|-----------|-----------|
| C | 0 | -1.263298 | 0.258113  | -1.612131 |
| C | 0 | -2.141574 | 0.985418  | -0.793285 |
| C | 0 | -2.507071 | 0.191457  | 0.312237  |
| C | 0 | -1.101274 | -1.021106 | -1.083711 |
| C | 0 | -2.223238 | -1.240557 | -0.100612 |
| H | 0 | -0.719890 | 0.661247  | -2.459763 |
| H | 0 | -2.382602 | 2.036583  | -0.914301 |
| H | 0 | -3.338446 | 0.445263  | 0.964048  |
| H | 0 | -0.536409 | -1.823766 | -1.543432 |
| H | 0 | -3.099111 | -1.606383 | -0.664528 |
| H | 0 | -2.028745 | -1.945603 | 0.707925  |
| C | 0 | -0.875119 | 0.376316  | 1.578599  |
| C | 0 | 0.119076  | -0.450520 | 1.033176  |
| B | 0 | 1.269146  | -0.028632 | 0.103957  |
| C | 0 | 2.349438  | -1.101789 | -0.360020 |
| C | 0 | 1.502676  | 1.490204  | -0.308822 |
| H | 0 | -1.421241 | 0.040671  | 2.459763  |
| H | 0 | -0.752452 | 1.454909  | 1.534266  |
| H | 0 | 0.090455  | -1.492588 | 1.359911  |
| H | 0 | 2.135611  | -2.131099 | -0.045776 |
| H | 0 | 3.338446  | -0.835441 | 0.044139  |
| H | 0 | 2.477893  | -1.101734 | -1.452288 |

|   |   |          |          |           |
|---|---|----------|----------|-----------|
| H | 0 | 2.248082 | 1.919146 | 0.380850  |
| H | 0 | 0.615739 | 2.131099 | -0.243433 |
| H | 0 | 1.929998 | 1.600467 | -1.314228 |

#### TS-7+CP

B3LYP/6-31G(d) Geometry

|    |   |           |           |           |
|----|---|-----------|-----------|-----------|
| C  | 0 | -0.900031 | 0.164371  | -1.612524 |
| C  | 0 | -1.726558 | 0.933423  | -0.773034 |
| C  | 0 | -2.113970 | 0.158111  | 0.338732  |
| C  | 0 | -0.812036 | -1.122341 | -1.102906 |
| C  | 0 | -1.894542 | -1.288286 | -0.072826 |
| H  | 0 | -0.347064 | 0.544574  | -2.463672 |
| H  | 0 | -1.919009 | 1.994505  | -0.891049 |
| H  | 0 | -2.938521 | 0.447655  | 0.984481  |
| H  | 0 | -0.257367 | -1.942639 | -1.543066 |
| H  | 0 | -2.806902 | -1.630736 | -0.590710 |
| H  | 0 | -1.688716 | -1.994505 | 0.732306  |
| C  | 0 | -0.523453 | 0.316702  | 1.592877  |
| C  | 0 | 0.492283  | -0.514384 | 1.088164  |
| B  | 0 | 1.659887  | -0.063705 | 0.248902  |
| Cl | 0 | 2.938521  | -1.210114 | -0.252108 |
| Cl | 0 | 1.879905  | 1.646652  | -0.234919 |
| H  | 0 | -1.082047 | -0.022853 | 2.463672  |
| H  | 0 | -0.374431 | 1.391891  | 1.565559  |
| H  | 0 | 0.476950  | -1.559332 | 1.393557  |

#### TS-8+CP

B3LYP/6-31G(d) Geometry

|    |   |           |           |           |
|----|---|-----------|-----------|-----------|
| C  | 0 | -1.440139 | -1.032199 | 0.500077  |
| C  | 0 | -0.905549 | -1.305478 | -0.895370 |
| C  | 0 | -0.563207 | 0.087083  | -1.332120 |
| C  | 0 | -1.359016 | 0.972822  | -0.615861 |
| C  | 0 | -1.948393 | 0.288254  | 0.460207  |
| H  | 0 | -1.914129 | -1.812741 | 1.089729  |
| H  | 0 | -1.745666 | -1.665976 | -1.513103 |
| H  | 0 | -0.101586 | -2.037239 | -0.974571 |
| H  | 0 | 0.023336  | 0.326193  | -2.211324 |
| H  | 0 | -1.443962 | 2.037239  | -0.806242 |
| H  | 0 | -2.560249 | 0.743906  | 1.232136  |
| C  | 0 | 0.326033  | -0.785531 | 1.413962  |
| C  | 0 | 1.261568  | -0.277844 | 0.494262  |
| C  | 0 | 1.614102  | 1.137903  | 0.414223  |
| O  | 0 | 2.560249  | 1.623728  | -0.178405 |
| Cl | 0 | 2.354948  | -1.394203 | -0.325638 |
| H  | 0 | 0.460322  | -1.812642 | 1.741119  |
| H  | 0 | 0.022361  | -0.114307 | 2.211324  |
| H  | 0 | 0.901880  | 1.773074  | 0.987770  |

#### TS-9+CP

B3LYP/6-31G(d) Geometry

|   |   |           |           |           |
|---|---|-----------|-----------|-----------|
| C | 0 | -2.131364 | -0.739089 | -0.579969 |
| C | 0 | -1.423628 | -1.387810 | 0.443782  |
| C | 0 | -0.849797 | -0.429990 | 1.275089  |
| C | 0 | -1.934932 | 0.655965  | -0.459374 |
| C | 0 | -1.521020 | 0.882811  | 0.983910  |
| H | 0 | -2.605160 | -1.231655 | -1.422929 |
| H | 0 | -1.267043 | -2.458567 | 0.518885  |
| H | 0 | -0.264594 | -0.635569 | 2.164014  |
| H | 0 | -2.550172 | 1.374825  | -0.994457 |
| H | 0 | -0.933751 | 1.778958  | 1.182782  |
| H | 0 | -2.439894 | 0.944584  | 1.592132  |
| C | 0 | 0.869704  | 0.507920  | -0.328658 |

C O -0.098705 0.914755 -1.269714  
C O 1.482838 -0.815540 -0.455117  
O O 2.502834 -1.168978 0.120970  
C O 1.598543 1.493137 0.555728  
H O -0.227689 0.311900 -2.164014  
H O -0.195674 1.982619 -1.457894  
H O 0.955454 -1.507902 -1.149875  
H O 1.740251 1.112181 1.572055  
H O 2.605160 1.673243 0.155020  
H O 1.085048 2.458567 0.605602

#### TS-10+CP

B3LYP/6-31G(d) Geometry

C O -1.568627 -1.534057 -0.953761  
C O -0.567296 -2.270016 -0.303072  
C O -0.370846 -1.733423 0.970417  
C O -1.974997 -0.473332 -0.120321  
C O -1.563742 -0.872361 1.283859  
H O -1.870913 -1.666710 -1.987701  
H O 0.034341 -3.051715 -0.754113  
H O 0.315963 -2.120387 1.714454  
H O -2.868113 0.114362 -0.313346  
H O -1.393830 -0.056185 1.987701  
H O -2.356804 -1.515948 1.701861  
C O 0.646655 0.362221 0.360159  
C O -0.427452 0.910941 -0.366261  
C O 1.786821 -0.274415 -0.291974  
O O 2.868113 -0.494749 0.232299  
C O -1.097224 2.186977 0.111284  
H O 0.813834 0.667098 1.391401  
H O -0.346758 0.838664 -1.449982  
H O 1.604201 -0.557713 -1.355733  
H O -0.454434 3.051715 -0.098804  
H O -2.055441 2.362509 -0.389333  
H O -1.274934 2.171168 1.192540

#### TS-11+CP

B3LYP/6-31G(d) Geometry

C O -0.223227 1.663066 -0.863880  
C O -1.389308 1.436595 -0.124611  
C O -1.050343 0.768599 1.068223  
C O 0.873229 1.149066 -0.153907  
C O 0.428239 0.991654 1.279493  
H O -0.186317 2.059085 -1.873308  
H O -2.400328 1.629910 -0.466556  
H O -1.749936 0.570336 1.873308  
H O 1.910825 1.279073 -0.441471  
H O 0.958698 0.239249 1.865168  
H O 0.555063 1.962788 1.786243  
C O -0.616455 -1.257286 0.340714  
C O 0.515193 -1.033526 -0.477270  
C O -1.930449 -1.530043 -0.270907  
O O -2.861208 -2.059085 0.304577  
C O 1.804926 -1.490476 -0.062906  
N O 2.861208 -1.837660 0.285533  
H O -0.477205 -1.680600 1.331490  
H O 0.374585 -0.988598 -1.553871  
H O -2.023644 -1.197536 -1.330487

#### TS-12+CP

B3LYP/6-31G(d) Geometry

C O 2.911476 0.491676 0.338620  
C O 2.480856 0.719216 -1.103139

C O 1.634427 -0.488382 -1.349770  
C O 1.967612 -1.467899 -0.431693  
C O 2.809376 -0.904989 0.548629  
H O 3.717332 1.070971 0.781890  
H O 3.382312 0.645930 -1.735130  
H O 2.009564 1.676413 -1.329162  
H O 0.968844 -0.609981 -2.196541  
H O 1.592901 -2.485263 -0.433070  
H O 3.200706 -1.433087 1.412291  
C O 1.342933 1.185339 1.318593  
C O 0.179688 1.099825 0.523358  
C O -0.678337 -0.031340 0.535660  
O O -1.759037 -0.116539 -0.090673  
B O -2.598966 -1.472606 -0.112640  
Cl O -0.303452 2.485263 -0.441450  
H O 1.725326 2.184738 1.507081  
H O 1.370692 0.548075 2.196541  
H O -0.364998 -0.879519 1.156118  
H O -2.538489 -1.832821 -1.271137  
H O -2.034590 -2.227111 0.662965  
H O -3.717332 -1.157795 0.223386

#### TS-13+CP

B3LYP/6-31G(d) Geometry

C O -2.955031 0.030120 -0.340067  
C O -2.586350 0.189209 1.128184  
C O -1.547126 -0.880950 1.273679  
C O -1.760328 -1.835404 0.291089  
C O -2.670454 -1.322891 -0.650697  
H O -3.822567 0.534564 -0.758027  
H O -3.467430 -0.104198 1.724361  
H O -2.294466 1.187485 1.453140  
H O -0.877117 -0.981066 2.119670  
H O -1.247834 -2.788296 0.220332  
H O -2.982476 -1.830309 -1.557781  
C O -1.452872 0.997907 -1.178912  
C O -0.323318 0.967391 -0.323225  
C O 0.648363 -0.060641 -0.487444  
O O 1.737281 -0.070989 0.142702  
B O 2.761400 -1.281423 0.032323  
C O -0.011567 2.090979 0.636918  
H O -1.953985 1.958926 -1.282177  
H O -1.391199 0.459646 -2.119670  
H O 0.460821 -0.870744 -1.201874  
H O 2.765627 -1.768715 1.146021  
H O 2.313362 -2.027997 -0.822709  
H O 3.822567 -0.775880 -0.259111  
H O -0.850313 2.788296 0.727307  
H O 0.854567 2.660811 0.275520  
H O 0.257667 1.724986 1.632977

#### TS-14+CP

B3LYP/6-31G(d) Geometry

C O -2.875180 -0.786491 -0.128781  
C O -2.456735 -1.164957 1.284107  
C O -1.137151 -1.822625 1.010531  
C O -1.150279 -2.300344 -0.294627  
C O -2.240589 -1.730668 -0.971178  
H O -3.877483 -0.424041 -0.341171  
H O -3.158020 -1.936111 1.646121  
H O -2.446122 -0.360731 2.020866  
H O -0.401394 -2.070159 1.766849  
H O -0.391719 -2.936036 -0.737460

|     |           |           |           |
|-----|-----------|-----------|-----------|
| H O | -2.471731 | -1.880965 | -2.020866 |
| C O | -1.760737 | 0.858265  | -0.345167 |
| C O | -0.592169 | 0.650805  | 0.431011  |
| C O | 0.632288  | 0.202499  | -0.126624 |
| O O | 1.711041  | 0.177177  | 0.516454  |
| B O | 3.040603  | -0.443111 | -0.095718 |
| C O | -2.727127 | 1.953183  | 0.079932  |
| H O | -1.610750 | 0.817524  | -1.422751 |
| H O | -0.562391 | 0.980197  | 1.466749  |
| H O | 0.650703  | -0.137979 | -1.170456 |
| H O | 3.269653  | -1.404555 | 0.611651  |
| H O | 2.776306  | -0.739884 | -1.249508 |
| H O | 3.877483  | 0.425310  | 0.012801  |
| H O | -2.279237 | 2.936036  | -0.110170 |
| H O | -2.954375 | 1.897803  | 1.150241  |
| H O | -3.669580 | 1.906315  | -0.474533 |

#### TS-15+CP

B3LYP/6-31G(d) Geometry

|     |           |           |           |
|-----|-----------|-----------|-----------|
| C O | 2.631074  | 0.881848  | -0.181660 |
| C O | 2.230993  | 1.006495  | 1.276308  |
| C O | 0.770199  | 1.318922  | 1.119956  |
| C O | 0.599415  | 1.941892  | -0.123491 |
| C O | 1.740126  | 1.715867  | -0.899365 |
| H O | 3.660699  | 0.720034  | -0.485361 |
| H O | 2.729362  | 1.900583  | 1.686062  |
| H O | 2.484573  | 0.163210  | 1.920205  |
| H O | 0.054651  | 1.344731  | 1.933949  |
| H O | -0.308280 | 2.432512  | -0.457259 |
| H O | 1.865620  | 2.017471  | -1.933949 |
| C O | 1.769034  | -0.975375 | -0.429633 |
| C O | 0.617509  | -0.978491 | 0.406272  |
| C O | -0.692859 | -0.790837 | -0.133756 |
| O O | -1.728360 | -0.982608 | 0.536306  |
| B O | -3.186767 | -0.647912 | -0.032686 |
| C O | 2.886242  | -1.797321 | -0.044457 |
| N O | 3.806619  | -2.432512 | 0.275746  |
| H O | 1.605720  | -0.951766 | -1.504195 |
| H O | 0.678623  | -1.379205 | 1.412648  |
| H O | -0.801076 | -0.447559 | -1.171515 |
| H O | -3.579719 | 0.230552  | 0.705996  |
| H O | -3.014520 | -0.290206 | -1.184066 |
| H O | -3.806619 | -1.678133 | 0.089700  |

#### TS-16+CP

B3LYP/6-31G(d) Geometry

|     |           |           |           |
|-----|-----------|-----------|-----------|
| C O | -1.721765 | -0.611388 | 0.885040  |
| C O | -1.682950 | 0.900046  | 0.713611  |
| C O | -0.312256 | 1.215311  | 1.223620  |
| C O | 0.129001  | 0.173279  | 2.012116  |
| C O | -0.763117 | -0.913325 | 1.874812  |
| H O | -2.651914 | -1.167874 | 0.802564  |
| H O | -2.425157 | 1.335355  | 1.404018  |
| H O | -1.906281 | 1.287526  | -0.282382 |
| H O | 0.180334  | 2.171590  | 1.091908  |
| H O | 1.047911  | 0.158868  | 2.586344  |
| H O | -0.647152 | -1.878770 | 2.356366  |
| C O | -0.817385 | -1.141947 | -0.802408 |
| C O | 0.263583  | -0.270201 | -1.080163 |
| C O | 1.586266  | -0.625936 | -0.687380 |
| C O | 0.084331  | 0.875635  | -1.907602 |
| N O | 2.651914  | -0.957240 | -0.348484 |
| N O | -0.102571 | 1.806141  | -2.586344 |

|     |           |           |           |
|-----|-----------|-----------|-----------|
| H O | -1.696691 | -1.036043 | -1.432201 |
| H O | -0.570753 | -2.171590 | -0.566361 |

#### TS-17+CP

B3LYP/6-31G(d) Geometry

|     |           |           |           |
|-----|-----------|-----------|-----------|
| C O | -1.617263 | -0.161950 | 0.758969  |
| C O | -1.618811 | 1.347770  | 0.760925  |
| C O | -0.131738 | 1.608274  | 0.760589  |
| C O | 0.475695  | 0.503977  | 1.375910  |
| C O | -0.424852 | -0.569152 | 1.374942  |
| H O | -2.520286 | -0.762008 | 0.719974  |
| H O | -2.029680 | 1.691678  | 1.724299  |
| H O | -2.193900 | 1.831097  | -0.031935 |
| H O | 0.302527  | 2.601773  | 0.722992  |
| H O | 1.516329  | 0.449463  | 1.674283  |
| H O | -0.190819 | -1.584848 | 1.672449  |
| C O | -0.946423 | -0.138126 | -1.368316 |
| C O | -0.036923 | 0.945641  | -1.367401 |
| C O | -0.514167 | -1.490764 | -1.543583 |
| C O | 1.370355  | 0.754883  | -1.541626 |
| N O | 2.520286  | 0.631962  | -1.674200 |
| N O | -0.193421 | -2.601773 | -1.677014 |
| H O | -1.953027 | 0.058612  | -1.724299 |
| H O | -0.405056 | 1.903207  | -1.722680 |

#### TS-18+CP

B3LYP/6-31G(d) Geometry

|     |           |           |           |
|-----|-----------|-----------|-----------|
| C O | -1.844975 | -0.595948 | 1.005841  |
| C O | -1.730807 | 0.878240  | 0.704881  |
| C O | -0.266878 | 1.091977  | 0.997738  |
| C O | 0.104819  | 0.123993  | 1.945490  |
| C O | -0.850669 | -0.900266 | 1.945908  |
| H O | -2.758840 | -1.162391 | 0.863874  |
| H O | -2.315089 | 1.427222  | 1.461533  |
| H O | -2.086055 | 1.194260  | -0.277559 |
| H O | 0.236176  | 2.045178  | 0.873091  |
| H O | 1.045889  | 0.105704  | 2.483140  |
| H O | -0.769878 | -1.832591 | 2.494461  |
| C O | -0.690834 | -1.040173 | -0.878614 |
| C O | 0.272519  | -0.002856 | -0.857886 |
| C O | -1.797663 | -0.961055 | -1.779026 |
| C O | 1.643866  | -0.319037 | -0.598226 |
| N O | 2.758840  | -0.572065 | -0.377881 |
| N O | -2.714337 | -0.887300 | -2.494461 |
| H O | -0.383153 | -2.045178 | -0.612417 |
| H O | 0.116518  | 0.859287  | -1.499489 |

#### TS-19+CP

B3LYP/6-31G(d) Geometry

|     |           |           |           |
|-----|-----------|-----------|-----------|
| C O | -1.329059 | -0.673944 | 1.339866  |
| C O | -1.361504 | 0.837305  | 1.462432  |
| C O | 0.109495  | 1.122187  | 1.579853  |
| C O | 0.714845  | -0.006871 | 2.128299  |
| C O | -0.169177 | -1.091308 | 2.019688  |
| H O | -2.236103 | -1.270655 | 1.302156  |
| H O | -1.846493 | 1.091860  | 2.420142  |
| H O | -1.891014 | 1.375822  | 0.674564  |
| H O | 0.539120  | 2.117626  | 1.566678  |
| H O | 1.743693  | -0.066678 | 2.464360  |
| H O | 0.065899  | -2.117626 | 2.282300  |
| C O | -0.703214 | -0.660136 | -0.665493 |

|     |           |           |           |
|-----|-----------|-----------|-----------|
| C O | 0.220519  | 0.403647  | -0.725207 |
| C O | -2.027880 | -0.546801 | -1.395650 |
| C O | 1.621621  | 0.162090  | -0.783020 |
| N O | 2.768660  | -0.045334 | -0.834859 |
| H O | -0.277177 | -1.659682 | -0.674747 |
| H O | -0.103714 | 1.372660  | -1.095688 |
| H O | -1.883648 | -0.752514 | -2.464360 |
| H O | -2.454102 | 0.459174  | -1.314637 |
| H O | -2.768660 | -1.261797 | -1.022445 |

#### TS-20+CP

B3LYP/6-31G(d) Geometry

|     |           |           |           |
|-----|-----------|-----------|-----------|
| C O | -1.552271 | -0.882915 | 1.444900  |
| C O | -1.608667 | 0.629450  | 1.556345  |
| C O | -0.143064 | 0.943369  | 1.653805  |
| C O | 0.494692  | -0.170466 | 2.186125  |
| C O | -0.371561 | -1.273981 | 2.110109  |
| H O | -2.452653 | -1.491746 | 1.442939  |
| H O | -2.087139 | 0.880967  | 2.518299  |
| H O | -2.161572 | 1.149050  | 0.772205  |
| H O | 0.270607  | 1.944577  | 1.610508  |
| H O | 1.530693  | -0.209211 | 2.502934  |
| H O | -0.108556 | -2.294196 | 2.369203  |
| C O | -0.995363 | -0.908675 | -0.523498 |
| C O | -0.084181 | 0.145054  | -0.738180 |
| C O | 1.311750  | -0.161386 | -0.749961 |
| C O | -0.486845 | 1.433296  | -1.434469 |
| N O | 2.452653  | -0.404640 | -0.777661 |
| H O | -1.997795 | -0.781905 | -0.927329 |
| H O | -0.633177 | -1.929627 | -0.564424 |
| H O | -1.550224 | 1.642618  | -1.281726 |
| H O | -0.323525 | 1.355075  | -2.518299 |
| H O | 0.089236  | 2.294196  | -1.081225 |

#### TS-21+CP

B3LYP/6-31G(d) Geometry

|     |           |           |           |
|-----|-----------|-----------|-----------|
| C O | 0.929854  | -1.909330 | -0.955226 |
| C O | 1.993807  | -1.244285 | -0.328608 |
| C O | 1.587140  | -0.840775 | 0.946102  |
| C O | -0.188789 | -1.890978 | -0.102350 |
| C O | 0.345662  | -1.616253 | 1.287617  |
| H O | 0.926536  | -2.257745 | -1.982872 |
| H O | 2.941615  | -0.994357 | -0.792920 |
| H O | 2.218974  | -0.345767 | 1.674801  |
| H O | -1.086517 | -2.471652 | -0.280778 |
| H O | -0.347091 | -1.145374 | 1.982872  |
| H O | 0.655690  | -2.581920 | 1.722161  |
| C O | 0.085494  | 0.902764  | 0.337360  |
| C O | -0.829233 | 0.135616  | -0.396870 |
| C O | 1.125257  | 1.699078  | -0.321312 |
| O O | 1.770707  | 2.581920  | 0.216181  |
| C O | -2.261680 | 0.064140  | 0.051119  |
| F O | -2.384252 | -0.119470 | 1.387779  |
| F O | -2.923928 | 1.205920  | -0.249674 |
| F O | -2.941615 | -0.939295 | -0.555618 |
| H O | -0.137484 | 1.179902  | 1.363676  |
| H O | -0.761599 | 0.167391  | -1.481290 |
| H O | 1.294415  | 1.437848  | -1.391867 |

#### TS-22+CP

B3LYP/6-31G(d) Geometry

|     |          |           |          |
|-----|----------|-----------|----------|
| C O | 0.523593 | -2.299423 | 0.256486 |
| C O | 1.622219 | -1.800986 | 0.968042 |

|     |           |           |           |
|-----|-----------|-----------|-----------|
| C O | 2.302753  | -0.857357 | 0.167872  |
| C O | 0.514049  | -1.730894 | -1.020480 |
| C O | 1.891946  | -1.166597 | -1.258956 |
| H O | -0.254147 | -2.934098 | 0.666819  |
| H O | 1.828993  | -1.995975 | 2.015494  |
| H O | 3.302461  | -0.506815 | 0.409943  |
| H O | -0.175629 | -1.990429 | -1.815409 |
| H O | 2.535034  | -1.985487 | -1.626254 |
| H O | 1.962139  | -0.344229 | -1.971214 |
| C O | 1.176023  | 0.872270  | 0.367637  |
| C O | 0.053605  | 0.629236  | -0.452437 |
| B O | -1.317166 | 0.082002  | -0.031976 |
| C O | -2.488793 | -0.029039 | -1.105886 |
| C O | -1.672414 | -0.240863 | 1.486216  |
| C O | 2.195083  | 1.932098  | -0.019430 |
| H O | 1.013596  | 0.805769  | 1.441947  |
| H O | 0.167080  | 0.957127  | -1.490250 |
| H O | -2.187687 | 0.199084  | -2.136160 |
| H O | -3.302461 | 0.664727  | -0.843101 |
| H O | -2.951506 | -1.026689 | -1.102285 |
| H O | -2.184931 | 0.639787  | 1.907093  |
| H O | -0.812046 | -0.438507 | 2.136160  |
| H O | -2.378757 | -1.074754 | 1.593704  |
| H O | 1.787151  | 2.934098  | 0.167978  |
| H O | 2.447141  | 1.879637  | -1.085171 |
| H O | 3.123642  | 1.847066  | 0.556076  |

#### TS-23+CP

B3LYP/6-31G(d) Geometry

|      |           |           |           |
|------|-----------|-----------|-----------|
| C O  | 0.421216  | -2.296702 | 0.119081  |
| C O  | 1.419582  | -1.714372 | 0.914393  |
| C O  | 2.030182  | -0.657868 | 0.201462  |
| C O  | 0.426469  | -1.682685 | -1.128985 |
| C O  | 1.717774  | -0.924789 | -1.261651 |
| H O  | -0.302952 | -3.028295 | 0.458141  |
| H O  | 1.595678  | -1.944044 | 1.960025  |
| H O  | 2.985482  | -0.240976 | 0.508940  |
| H O  | -0.222577 | -1.932791 | -1.960025 |
| H O  | 2.483274  | -1.619497 | -1.648052 |
| H O  | 1.700528  | -0.055941 | -1.920263 |
| C O  | 0.784095  | 0.916911  | 0.473664  |
| C O  | -0.319573 | 0.664641  | -0.375961 |
| B O  | -1.634271 | 0.056678  | 0.027843  |
| Cl O | -2.985482 | -0.087283 | -1.139441 |
| Cl O | -1.968387 | -0.480544 | 1.705217  |
| C O  | 1.712247  | 2.081631  | 0.163339  |
| H O  | 0.597406  | 0.786748  | 1.537613  |
| H O  | -0.249148 | 1.052797  | -1.392466 |
| H O  | 1.205507  | 3.028295  | 0.388786  |
| H O  | 1.993075  | 2.106059  | -0.895932 |
| H O  | 2.629297  | 2.050528  | 0.761236  |

#### TS-24+CP

B3LYP/6-31G(d) Geometry

|     |           |          |           |
|-----|-----------|----------|-----------|
| C O | 0.620814  | 1.493275 | -0.979894 |
| C O | 1.670068  | 1.224537 | -0.085371 |
| C O | 1.129145  | 0.804976 | 1.135217  |
| C O | -0.597935 | 1.259583 | -0.336052 |
| C O | -0.324332 | 1.204727 | 1.145895  |
| H O | 0.741231  | 1.729639 | -2.031213 |
| H O | 2.722634  | 1.216239 | -0.343199 |
| H O | 1.708898  | 0.611505 | 2.031213  |
| H O | -1.574816 | 1.457525 | -0.764257 |



|     |           |           |           |
|-----|-----------|-----------|-----------|
| H O | -0.398311 | 2.229036  | 1.546504  |
| H O | -0.995379 | 0.573348  | 1.729930  |
| C O | 0.512320  | -1.270636 | 0.514409  |
| C O | -0.508168 | -1.022414 | -0.397388 |
| N O | 1.793217  | -1.715813 | -0.003033 |
| N O | -1.882602 | -1.249244 | 0.012311  |
| O O | 2.567933  | -2.229036 | 0.805761  |
| O O | 2.037506  | -1.530776 | -1.199823 |
| O O | -2.135272 | -1.362243 | 1.218587  |
| O O | -2.722634 | -1.301039 | -0.887107 |
| H O | 0.318124  | -1.619723 | 1.517513  |
| H O | -0.369386 | -1.125418 | -1.461523 |

#### TS-25+CP

B3LYP/6-31G(d) Geometry

|     |           |           |           |
|-----|-----------|-----------|-----------|
| C O | 0.623396  | 0.672544  | 1.203852  |
| C O | -0.779191 | 0.676807  | 1.216287  |
| C O | -1.241604 | 0.981891  | -0.062234 |
| C O | 1.074474  | 0.924779  | -0.111154 |
| C O | -0.093121 | 1.570555  | -0.834224 |
| H O | 1.257321  | 0.380104  | 2.033069  |
| H O | -1.396415 | 0.376302  | 2.055141  |
| H O | -2.282710 | 1.084610  | -0.346663 |
| H O | 2.109069  | 1.156461  | -0.343820 |
| H O | -0.058206 | 2.654147  | -0.632550 |
| H O | -0.122438 | 1.436874  | -1.916846 |
| C O | -0.536495 | -1.109133 | -1.125181 |
| C O | 0.859281  | -0.890481 | -1.030131 |
| C O | -1.357638 | -1.929631 | -0.256872 |
| C O | 1.924595  | -1.665869 | -0.277329 |
| O O | 3.075564  | -1.594699 | -0.658929 |
| O O | 1.594172  | -2.352582 | 0.817875  |
| O O | -1.035329 | -2.444698 | 0.819045  |
| O O | -2.617300 | -2.090253 | -0.729169 |
| H O | -1.020557 | -0.833331 | -2.055141 |
| H O | 1.306022  | -0.548510 | -1.959699 |
| H O | 0.607294  | -2.386645 | 0.943149  |
| H O | -3.075564 | -2.654147 | -0.079063 |

#### TS-26+CP

B3LYP/6-31G(d) Geometry

|     |           |           |           |
|-----|-----------|-----------|-----------|
| C O | -1.574641 | -0.358581 | 0.983497  |
| C O | -1.659637 | 1.152746  | 1.110984  |
| C O | -0.212792 | 1.493792  | 1.289553  |
| C O | 0.452083  | 0.378066  | 1.780846  |
| C O | -0.387344 | -0.740025 | 1.658494  |
| H O | -2.460673 | -0.987647 | 0.982528  |
| H O | -2.193461 | 1.381653  | 2.048117  |
| H O | -2.172448 | 1.686992  | 0.309076  |
| H O | 0.187818  | 2.499076  | 1.229855  |
| H O | 1.481737  | 0.355215  | 2.117554  |
| H O | -0.112517 | -1.760633 | 1.899631  |
| C O | -1.030470 | -0.407964 | -0.943033 |
| C O | -0.088241 | 0.646639  | -1.178740 |
| C O | -0.619500 | -1.778353 | -1.128771 |
| C O | 1.315354  | 0.395008  | -1.213165 |
| C O | -0.554590 | 1.887331  | -1.704633 |
| N O | 2.460673  | 0.182063  | -1.228693 |
| N O | -0.324472 | -2.895282 | -1.254613 |
| N O | -0.970810 | 2.895282  | -2.117554 |
| H O | -2.026853 | -0.217460 | -1.337078 |

#### TS-27+CP

B3LYP/6-31G(d) Geometry

|     |           |           |           |
|-----|-----------|-----------|-----------|
| C O | -1.567335 | -0.525290 | 1.400792  |
| C O | -1.626586 | 0.984815  | 1.515436  |
| C O | -0.159159 | 1.295327  | 1.612713  |
| C O | 0.469690  | 0.184329  | 2.167873  |
| C O | -0.398293 | -0.916337 | 2.087099  |
| H O | -2.466870 | -1.135776 | 1.383641  |
| H O | -2.103647 | 1.237350  | 2.477847  |
| H O | -2.179473 | 1.505061  | 0.732188  |
| H O | 0.256082  | 2.296292  | 1.574906  |
| H O | 1.501431  | 0.146912  | 2.498757  |
| H O | -0.143567 | -1.934168 | 2.362004  |
| C O | -0.981446 | -0.552335 | -0.578076 |
| C O | -0.086599 | 0.535899  | -0.737433 |
| C O | -0.535226 | -1.985372 | -0.792602 |
| C O | 1.318787  | 0.272085  | -0.771085 |
| C O | -0.513458 | 1.828377  | -1.415617 |
| N O | 2.466870  | 0.068134  | -0.815960 |
| H O | -1.985263 | -0.346346 | -0.951232 |
| H O | 0.439269  | -2.174458 | -0.334193 |
| H O | -0.437203 | -2.195194 | -1.866081 |
| H O | -1.257806 | -2.696886 | -0.378363 |
| H O | -1.583140 | 2.009900  | -1.273514 |
| H O | -0.335845 | 1.773533  | -2.498757 |
| H O | 0.037563  | 2.696886  | -1.040999 |

#### TS-28+CP

B3LYP/6-31G(d) Geometry

|     |           |           |           |
|-----|-----------|-----------|-----------|
| C O | -1.337888 | -0.890020 | 1.387495  |
| C O | -1.411895 | 0.618676  | 1.518182  |
| C O | 0.050219  | 0.943766  | 1.626063  |
| C O | 0.687676  | -0.167851 | 2.174504  |
| C O | -0.164773 | -1.276226 | 2.070255  |
| H O | -2.230533 | -1.509413 | 1.360585  |
| H O | -1.898679 | 0.856113  | 2.479491  |
| H O | -1.966136 | 1.144487  | 0.739252  |
| H O | 0.452287  | 1.950706  | 1.607794  |
| H O | 1.718613  | -0.199179 | 2.507816  |
| H O | 0.102499  | -2.296435 | 2.325493  |
| C O | -0.743749 | -0.874417 | -0.601541 |
| C O | 0.166793  | 0.210270  | -0.717103 |
| C O | -2.076444 | -0.850833 | -1.326910 |
| C O | 1.560620  | -0.107343 | -0.688052 |
| C O | -0.182507 | 1.513663  | -1.415358 |
| N O | 2.698910  | -0.364366 | -0.680735 |
| H O | -0.285609 | -1.858608 | -0.585188 |
| H O | -1.920787 | -0.914911 | -2.412525 |
| H O | -2.648889 | 0.062509  | -1.136624 |
| H O | -2.698910 | -1.702478 | -1.034491 |
| H O | -1.175577 | 1.876409  | -1.134842 |
| H O | -0.181364 | 1.387768  | -2.507816 |
| H O | 0.542974  | 2.296435  | -1.176595 |

#### TS-29+CP

B3LYP/6-31G(d) Geometry

|     |           |           |          |
|-----|-----------|-----------|----------|
| C O | -1.315636 | -0.266014 | 1.175831 |
| C O | -1.295208 | 1.240589  | 1.132876 |
| C O | 0.196602  | 1.477137  | 1.131375 |
| C O | 0.779395  | 0.382946  | 1.799446 |
| C O | -0.139484 | -0.673755 | 1.817789 |
| H O | -2.226844 | -0.851226 | 1.117022 |
| H O | -1.701964 | 1.620184  | 2.084583 |

|     |           |           |           |
|-----|-----------|-----------|-----------|
| H O | -1.864870 | 1.702156  | 0.324597  |
| H O | 0.642631  | 2.465881  | 1.093539  |
| H O | 1.814113  | 0.325105  | 2.117609  |
| H O | 0.069769  | -1.679144 | 2.166704  |
| C O | -0.536147 | -0.308227 | -0.990180 |
| C O | 0.329711  | 0.821971  | -0.928134 |
| C O | -1.833012 | -0.091271 | -1.563704 |
| C O | 0.022319  | -1.713310 | -1.133602 |
| C O | 1.743799  | 0.646875  | -1.082043 |
| N O | 2.894320  | 0.511247  | -1.198372 |
| N O | -2.894320 | 0.070362  | -2.017679 |
| H O | -0.040652 | 1.765072  | -1.319334 |
| H O | 0.893321  | -1.845616 | -0.486771 |
| H O | 0.345057  | -1.894075 | -2.166704 |
| H O | -0.727817 | -2.465881 | -0.876446 |

#### TS-30+CP

B3LYP/6-31G(d) Geometry

|     |           |           |           |
|-----|-----------|-----------|-----------|
| C O | -1.599086 | -0.385626 | 1.499019  |
| C O | -1.634842 | 1.123061  | 1.507749  |
| C O | -0.155378 | 1.413476  | 1.480457  |
| C O | 0.483373  | 0.327124  | 2.096373  |
| C O | -0.391657 | -0.764488 | 2.112860  |
| H O | -2.490840 | -1.003862 | 1.483225  |
| H O | -2.035055 | 1.453740  | 2.480386  |
| H O | -2.238546 | 1.594575  | 0.730953  |
| H O | 0.259485  | 2.414239  | 1.423171  |
| H O | 1.528490  | 0.297092  | 2.381973  |
| H O | -0.131354 | -1.774389 | 2.407887  |
| C O | -0.978305 | -0.379826 | -0.601853 |
| C O | -0.068474 | 0.712045  | -0.682965 |
| C O | -0.551456 | -1.739335 | -0.744660 |
| C O | 1.340901  | 0.438736  | -0.758712 |
| C O | -0.492993 | 1.987657  | -1.400368 |
| N O | 2.490840  | 0.271195  | -0.829330 |
| N O | -0.237138 | -2.854800 | -0.854346 |
| H O | -1.981065 | -0.197214 | -0.980855 |
| H O | -1.556878 | 2.189606  | -1.246527 |
| H O | -0.327819 | 1.886101  | -2.480386 |
| H O | 0.079734  | 2.854800  | -1.059493 |

#### TS-31+CP

B3LYP/6-31G(d) Geometry

|     |           |           |           |
|-----|-----------|-----------|-----------|
| C O | 1.598960  | -1.429304 | 1.072137  |
| C O | 0.499294  | -2.220616 | 0.714640  |
| C O | 0.201191  | -1.989112 | -0.632941 |
| C O | 1.971588  | -0.635012 | -0.031075 |
| C O | 1.413738  | -1.343771 | -1.249463 |
| H O | 2.001166  | -1.334971 | 2.075343  |
| H O | -0.093954 | -2.822824 | 1.394360  |
| H O | -0.570229 | -2.500720 | -1.197619 |
| H O | 2.903493  | -0.077032 | -0.063079 |
| H O | 1.232638  | -0.727705 | -2.130680 |
| H O | 2.120708  | -2.140419 | -1.538421 |
| C O | -0.640913 | 0.197131  | -0.521781 |
| C O | 0.490677  | 0.891738  | -0.021432 |
| C O | -1.820636 | -0.196308 | 0.247879  |
| O O | -2.903493 | -0.468426 | -0.251624 |
| C O | 0.515455  | 1.370385  | 1.424667  |
| C O | 1.149958  | 1.884616  | -0.972347 |
| H O | -0.835221 | 0.244034  | -1.591681 |
| H O | -1.689315 | -0.247681 | 1.350237  |
| H O | 0.169459  | 0.612573  | 2.130680  |

|     |           |          |           |
|-----|-----------|----------|-----------|
| H O | 1.529745  | 1.664337 | 1.718167  |
| H O | -0.127890 | 2.253670 | 1.542469  |
| H O | 0.577826  | 2.822824 | -0.986288 |
| H O | 2.169876  | 2.134632 | -0.658389 |
| H O | 1.187684  | 1.513272 | -2.001247 |

#### TS-32+CP

B3LYP/6-31G(d) Geometry

|     |           |           |           |
|-----|-----------|-----------|-----------|
| C O | 0.079161  | 1.203948  | 0.946049  |
| C O | 1.321339  | 0.942091  | 0.351057  |
| C O | 1.122391  | 0.600890  | -1.015867 |
| C O | -0.907848 | 1.143745  | -0.031065 |
| C O | -0.249388 | 1.153492  | -1.375492 |
| H O | -0.092157 | 1.341140  | 2.007243  |
| H O | 2.268085  | 0.878323  | 0.876665  |
| H O | 1.944779  | 0.596662  | -1.726416 |
| H O | -1.970560 | 1.284222  | 0.128226  |
| H O | -0.793336 | 0.640061  | -2.170058 |
| H O | -0.113153 | 2.200857  | -1.692737 |
| C O | 0.608769  | -1.292510 | -1.011364 |
| C O | -0.652940 | -1.422960 | -0.345288 |
| C O | 1.841768  | -1.910879 | -0.424642 |
| O O | 2.807419  | -2.200857 | -1.096803 |
| C O | -1.847900 | -1.545901 | -1.114574 |
| C O | -0.721168 | -1.771884 | 1.037926  |
| N O | -2.807419 | -1.621813 | -1.772954 |
| N O | -0.743176 | -2.049253 | 2.170058  |
| H O | 0.572737  | -1.409730 | -2.092440 |
| H O | 1.826794  | -2.065596 | 0.673125  |

#### TS-33+CP

B3LYP/6-31G(d) Geometry

|     |           |           |           |
|-----|-----------|-----------|-----------|
| C O | -1.846239 | 0.146860  | 0.971562  |
| C O | -1.733121 | 1.619758  | 0.673053  |
| C O | -0.270131 | 1.824359  | 0.971647  |
| C O | 0.093891  | 0.858434  | 1.937102  |
| C O | -0.859572 | -0.156388 | 1.937024  |
| H O | -2.755929 | -0.425770 | 0.826659  |
| H O | -2.319162 | 2.170321  | 1.426166  |
| H O | -2.079172 | 1.944939  | -0.309327 |
| H O | 0.244702  | 2.767994  | 0.826937  |
| H O | 1.027614  | 0.846659  | 2.487002  |
| H O | -0.789707 | -1.087607 | 2.486858  |
| C O | -0.715082 | -0.335802 | -0.857343 |
| C O | 0.282254  | 0.725832  | -0.857160 |
| C O | -1.817474 | -0.246888 | -1.778534 |
| C O | -0.291774 | -1.680353 | -0.563805 |
| C O | 1.650572  | 0.387138  | -0.563560 |
| N O | -2.737026 | -0.174871 | -2.487002 |
| C O | 0.124898  | 1.820630  | -1.778281 |
| N O | 0.026624  | -2.767994 | -0.304469 |
| N O | 2.755929  | 0.137173  | -0.304152 |
| N O | -0.004216 | 2.733987  | -2.486653 |

#### TS-34+CP

B3LYP/6-31G(d) Geometry

|     |           |           |          |
|-----|-----------|-----------|----------|
| C O | -1.338342 | -0.445056 | 1.605995 |
| C O | -1.299650 | 1.040234  | 1.427599 |
| C O | 0.196328  | 1.254396  | 1.266357 |
| C O | 0.811722  | 0.180481  | 1.966949 |
| C O | -0.109637 | -0.862912 | 2.111281 |
| H O | -2.241856 | -1.041889 | 1.557953 |
| H O | -1.607838 | 1.518133  | 2.372149 |

|     |           |           |           |
|-----|-----------|-----------|-----------|
| H O | -1.945745 | 1.434467  | 0.642747  |
| H O | 0.634607  | 2.248674  | 1.259742  |
| H O | 1.867562  | 0.122127  | 2.205474  |
| H O | 0.121397  | -1.862170 | 2.460617  |
| C O | -0.535512 | -0.423126 | -0.817962 |
| C O | 0.342370  | 0.717598  | -0.657273 |
| C O | -1.841111 | -0.238386 | -1.361620 |
| C O | -0.024669 | -1.755753 | -0.818208 |
| C O | 1.763012  | 0.439945  | -0.764631 |
| C O | -0.031426 | 2.015087  | -1.383797 |
| N O | 2.912164  | 0.286143  | -0.844066 |
| N O | -2.912164 | -0.057762 | -1.786444 |
| N O | 0.393791  | -2.843206 | -0.808017 |
| H O | -1.080443 | 2.272660  | -1.225240 |
| H O | 0.123089  | 1.887985  | -2.460617 |
| H O | 0.596485  | 2.843206  | -1.046355 |

#### TS-35+CP

B3LYP/6-31G(d) Geometry

|     |           |           |           |
|-----|-----------|-----------|-----------|
| C O | -0.706363 | 2.198819  | 0.101397  |
| C O | 0.619853  | 1.969319  | -0.268506 |
| C O | 0.655893  | 0.979557  | -1.299010 |
| C O | -1.537901 | 1.450460  | -0.735616 |
| C O | -0.734348 | 1.011301  | -1.919312 |
| H O | -1.031049 | 2.775594  | 0.959283  |
| H O | 1.491660  | 2.375733  | 0.232833  |
| H O | 1.547127  | 0.833778  | -1.903840 |
| H O | -2.620136 | 1.416411  | -0.686971 |
| H O | -1.078994 | 0.101184  | -2.409344 |
| H O | -0.743303 | 1.816213  | -2.672684 |
| C O | 0.477491  | -0.764825 | -0.397343 |
| C O | -0.852504 | -0.762237 | 0.180883  |
| C O | 1.630024  | -0.617874 | 0.567571  |
| O O | 2.743869  | -1.033015 | 0.334189  |
| C O | -1.898355 | -1.511486 | -0.439932 |
| C O | -1.063574 | -0.421761 | 1.554421  |
| C O | 0.768415  | -1.764364 | -1.509417 |
| N O | -2.743869 | -2.105798 | -0.979803 |
| N O | -1.220458 | -0.132337 | 2.672684  |
| H O | 1.402386  | -0.074694 | 1.505468  |
| H O | 1.747762  | -1.567977 | -1.949771 |
| H O | 0.797284  | -2.775594 | -1.088603 |
| H O | 0.006094  | -1.755201 | -2.290292 |

#### TS-36+CP

B3LYP/6-31G(d) Geometry

|     |           |           |           |
|-----|-----------|-----------|-----------|
| C O | 2.022892  | -1.052482 | 0.704955  |
| C O | 1.151569  | -2.090361 | 0.355043  |
| C O | 0.556648  | -1.785056 | -0.873214 |
| C O | 1.922177  | -0.024402 | -0.264579 |
| C O | 1.385424  | -0.705151 | -1.508717 |
| H O | 2.559482  | -0.976086 | 1.644586  |
| H O | 0.899856  | -2.941009 | 0.979463  |
| H O | -0.132875 | -2.425325 | -1.411906 |
| H O | 2.652363  | 0.778964  | -0.326332 |
| H O | 0.877003  | -0.067302 | -2.230313 |
| H O | 2.232335  | -1.180505 | -2.033144 |
| C O | -0.864529 | 0.108966  | -0.191124 |
| C O | 0.196401  | 0.978805  | 0.231587  |
| C O | -1.554272 | -0.785132 | 0.752361  |
| O O | -2.652363 | -1.290562 | 0.552299  |
| C O | -1.653901 | 0.373341  | -1.456546 |
| C O | 0.402490  | 1.246069  | 1.723457  |

|     |           |           |           |
|-----|-----------|-----------|-----------|
| C O | 0.392245  | 2.263595  | -0.572597 |
| H O | -1.019941 | -1.003233 | 1.697342  |
| H O | -2.307317 | -0.475208 | -1.669072 |
| H O | -2.303055 | 1.252005  | -1.326379 |
| H O | -1.031372 | 0.573352  | -2.332809 |
| H O | 0.398709  | 0.341703  | 2.332809  |
| H O | 1.357953  | 1.756519  | 1.891923  |
| H O | -0.391890 | 1.904659  | 2.101488  |
| H O | -0.459137 | 2.941009  | -0.417497 |
| H O | 1.292612  | 2.794198  | -0.244376 |
| H O | 0.476569  | 2.092707  | -1.648964 |

#### TS-37+CP

B3LYP/6-31G(d) Geometry

|     |           |           |           |
|-----|-----------|-----------|-----------|
| C O | -2.677142 | 1.309052  | -0.453787 |
| C O | -2.152419 | 1.139463  | -1.851709 |
| C O | -0.667183 | 1.244693  | -1.571715 |
| C O | -0.551772 | 2.115975  | -0.447276 |
| C O | -1.761005 | 2.130934  | 0.236718  |
| H O | -3.718881 | 1.179762  | -0.181785 |
| H O | -2.445308 | 2.019922  | -2.446192 |
| H O | -2.496211 | 0.254606  | -2.386428 |
| H O | 0.087038  | 1.195340  | -2.351277 |
| H O | 0.369643  | 2.583939  | -0.117248 |
| H O | -1.935837 | 2.590492  | 1.202233  |
| C O | -1.784261 | -0.716364 | 0.055934  |
| C O | -0.577050 | -0.671873 | -0.757919 |
| C O | 0.693554  | -0.444827 | -0.059091 |
| O O | 1.776221  | -0.713183 | -0.597154 |
| C O | -2.882680 | -1.526193 | -0.392513 |
| C O | -1.700957 | -0.565935 | 1.483709  |
| C O | -0.477934 | -1.562658 | -1.986024 |
| N O | -1.623901 | -0.419083 | 2.635692  |
| N O | -3.784418 | -2.150767 | -0.782481 |
| H O | 0.697369  | 0.007648  | 0.939286  |
| H O | -1.408408 | -1.585788 | -2.555366 |
| H O | -0.258967 | -2.590492 | -1.673690 |
| H O | 0.337660  | -1.239578 | -2.635692 |
| B O | 3.206264  | -0.330095 | 0.066189  |
| H O | 3.673881  | 0.428573  | -0.753091 |
| H O | 2.929404  | 0.177802  | 1.133175  |
| H O | 3.784418  | -1.386973 | 0.127690  |

#### TS-38+CP

B3LYP/6-31G(d) Geometry

|     |           |           |           |
|-----|-----------|-----------|-----------|
| C O | -1.258539 | -0.539607 | 1.478272  |
| C O | -1.275398 | 0.966867  | 1.464675  |
| C O | 0.209568  | 1.235196  | 1.439684  |
| C O | 0.822653  | 0.151163  | 2.098831  |
| C O | -0.069277 | -0.925399 | 2.118900  |
| H O | -2.158442 | -1.143780 | 1.432313  |
| H O | -1.671929 | 1.319590  | 2.431007  |
| H O | -1.874328 | 1.429342  | 0.679990  |
| H O | 0.634768  | 2.232986  | 1.400835  |
| H O | 1.861052  | 0.115297  | 2.407936  |
| H O | 0.166203  | -1.928813 | 2.456288  |
| C O | -0.535295 | -0.553825 | -0.659912 |
| C O | 0.342874  | 0.583512  | -0.656740 |
| C O | -1.835683 | -0.367146 | -1.239859 |
| C O | 0.015401  | -1.966461 | -0.795058 |
| C O | 1.754598  | 0.302291  | -0.714623 |
| C O | -0.032912 | 1.877110  | -1.375489 |
| N O | 2.901170  | 0.107184  | -0.771330 |



N O -2.901170 -0.238704 -1.694549  
H O 0.891917 -2.099206 -0.156957  
H O 0.324975 -2.161206 -1.829720  
H O -0.737627 -2.710474 -0.520794  
H O -1.082494 2.133227 -1.216948  
H O 0.116036 1.763078 -2.456288  
H O 0.589805 2.710474 -1.038951

#### TS-39+CP

B3LYP/6-31G(d) Geometry

C O -1.391272 -0.400933 1.457614  
C O -1.395468 1.106368 1.490456  
C O 0.089620 1.364258 1.458924  
C O 0.701698 0.258377 2.076908  
C O -0.196277 -0.811957 2.076192  
H O -2.294953 -1.000797 1.423237  
H O -1.784529 1.432024 2.469319  
H O -1.991369 1.606876 0.726921  
H O 0.523351 2.358446 1.425428  
H O 1.745413 0.201742 2.363269  
H O 0.040714 -1.830168 2.361904  
C O -0.745735 -0.375176 -0.677061  
C O 0.177558 0.725287 -0.676638  
C O -2.094454 -0.254678 -1.379607  
C O -0.210155 -1.710264 -0.734084  
C O 1.585419 0.429940 -0.733018  
C O -0.175201 2.032967 -1.378510  
N O 2.734658 0.252147 -0.789374  
N O 0.164673 -2.811080 -0.790962  
H O -1.960074 -0.246898 -2.469319  
H O -2.624005 0.661028 -1.105888  
H O -2.734658 -1.105561 -1.132525  
H O -1.169021 2.395289 -1.104810  
H O -0.159300 1.899906 -2.468300  
H O 0.551507 2.811080 -1.130827

#### TS-40+CP

B3LYP/6-31G(d) Geometry

C O -1.308136 -0.500976 1.385138  
C O -1.351537 1.007580 1.516321  
C O 0.120232 1.300025 1.590731  
C O 0.737841 0.180647 2.153018  
C O -0.141277 -0.906637 2.070215  
H O -2.212974 -1.103276 1.367243  
H O -1.810388 1.257190 2.488171  
H O -1.910699 1.545624 0.750823  
H O 0.544001 2.298086 1.563867  
H O 1.770506 0.131534 2.479122  
H O 0.101010 -1.927973 2.343427  
C O -0.720222 -0.517152 -0.625759  
C O 0.184637 0.589150 -0.716667  
C O -2.078790 -0.377906 -1.302367  
C O -0.154395 -1.924250 -0.771181  
C O 1.589662 0.314316 -0.735710  
C O -0.181736 1.901513 -1.395990  
N O 2.738287 0.111465 -0.770962  
H O -1.959391 -0.413318 -2.394787  
H O -2.595509 0.555384 -1.064259  
H O -2.738287 -1.206574 -1.023277  
H O 0.794526 -2.044513 -0.245012  
H O 0.028988 -2.145975 -1.831993  
H O -0.860269 -2.673278 -0.394795  
H O -1.157747 2.278304 -1.078788

H O -0.222844 1.779772 -2.488171  
H O 0.562875 2.673278 -1.181571

#### TS-41+CP

B3LYP/6-31G(d) Geometry

C O 1.229632 0.230347 1.211117  
C O 0.905384 -1.099365 0.876928  
C O 0.996927 -1.252798 -0.501070  
C O 1.442343 0.960716 0.030652  
C O 1.747864 -0.065298 -1.045203  
H O 1.192712 0.648895 2.211221  
H O 0.550623 -1.853334 1.571035  
H O 0.855295 -2.182920 -1.039257  
H O 1.887661 1.951433 0.024312  
H O 1.507026 0.226550 -2.069309  
H O 2.827277 -0.291122 -1.008552  
C O -0.936474 0.050812 -1.216862  
C O -0.521903 1.276211 -0.648822  
C O -1.955840 -0.161120 -0.169942  
C O -1.540587 1.180921 0.501591  
O O -2.827277 -0.972391 0.052432  
H O -0.836574 -0.372282 -2.211221  
H O -0.230421 2.182920 -1.168899  
H O -1.129584 1.108993 1.516093  
H O -2.345757 1.925163 0.491477

#### TS-42+CP

B3LYP/6-31G(d) Geometry

C O -1.621806 -1.463350 0.163737  
C O -1.165087 -0.937967 1.388211  
C O -0.918516 0.420362 1.233264  
C O -1.559749 -0.451808 -0.815501  
C O -1.573057 0.857862 -0.049851  
H O -1.846854 -2.507792 -0.022992  
H O -0.955592 -1.516617 2.281358  
H O -0.603476 1.095679 2.020486  
H O -2.043181 -0.550650 -1.783655  
H O -1.125380 1.713374 -0.556321  
H O -2.622578 1.119550 0.168666  
C O 1.117239 0.361211 -0.237241  
C O 0.454376 -0.368294 -1.263300  
C O 1.793446 -0.859000 0.255858  
C O 1.133269 -1.693767 -0.870811  
O O 2.622578 -1.098254 1.108614  
C O 1.557522 1.784812 -0.064818  
H O 0.276517 -0.032216 -2.281358  
H O 0.474421 -2.513941 -0.558055  
H O 1.870884 -2.077172 -1.586340  
H O 0.787205 2.513941 -0.335571  
H O 2.431453 1.991777 -0.699100  
H O 1.862614 1.971180 0.970280

#### TS-43+CP

B3LYP/6-31G(d) Geometry

C O 1.190070 -0.779098 1.148084  
C O 0.900875 -1.871286 0.310943  
C O 0.959646 -1.447173 -1.015203  
C O 1.359834 0.371540 0.359382  
C O 1.684518 -0.126364 -1.035996  
H O 1.158631 -0.798467 2.232382  
H O 0.576867 -2.851509 0.642863  
H O 0.839748 -2.089330 -1.880374  
H O 1.772948 1.296353 0.751247

|     |           |           |           |
|-----|-----------|-----------|-----------|
| H O | 1.430995  | 0.545854  | -1.858050 |
| H O | 2.768551  | -0.324843 | -1.090702 |
| C O | -0.977372 | -0.077133 | -1.148929 |
| C O | -0.642160 | 0.887062  | -0.158558 |
| C O | -1.955127 | -0.741990 | -0.269217 |
| C O | -1.616482 | 0.260784  | 0.865651  |
| O O | -2.768551 | -1.633747 | -0.381384 |
| C O | -0.444641 | 2.371816  | -0.340169 |
| H O | -0.899367 | -0.059728 | -2.232382 |
| H O | -1.175053 | -0.159766 | 1.777207  |
| H O | -2.474174 | 0.888936  | 1.139854  |
| H O | -1.404622 | 2.846392  | -0.587145 |
| H O | 0.251462  | 2.596262  | -1.156185 |
| H O | -0.069193 | 2.851509  | 0.570189  |

#### TS-44+CP

B3LYP/6-31G(d) Geometry

|     |           |           |           |
|-----|-----------|-----------|-----------|
| C O | 0.748086  | 1.422696  | 1.126076  |
| C O | 1.792425  | 1.401356  | 0.188583  |
| C O | 1.247215  | 1.234113  | -1.095605 |
| C O | -0.469908 | 1.269675  | 0.455914  |
| C O | -0.218509 | 1.594383  | -0.995718 |
| H O | 0.874497  | 1.448012  | 2.203115  |
| H O | 2.850983  | 1.391792  | 0.423695  |
| H O | 1.823421  | 1.319210  | -2.010813 |
| H O | -1.446947 | 1.338852  | 0.920307  |
| H O | -0.887840 | 1.117070  | -1.713880 |
| H O | -0.312500 | 2.685068  | -1.128534 |
| C O | 0.688053  | -0.874293 | -1.123700 |
| C O | -0.294961 | -0.954406 | -0.096638 |
| C O | 1.679848  | -1.592210 | -0.268403 |
| C O | 0.653512  | -1.657093 | 0.895192  |
| O O | 2.797584  | -2.018226 | -0.420944 |
| C O | -1.697318 | -1.135372 | -0.218761 |
| N O | -2.850983 | -1.279670 | -0.311593 |
| H O | 0.573152  | -0.886097 | -2.203115 |
| H O | 0.908388  | -1.100175 | 1.804179  |
| H O | 0.381220  | -2.685068 | 1.160124  |

#### TS-45+CP

B3LYP/6-31G(d) Geometry

|      |           |           |           |
|------|-----------|-----------|-----------|
| C O  | 1.847687  | 0.522934  | 0.023392  |
| C O  | 1.342586  | 0.329846  | 1.327671  |
| C O  | 0.626322  | -0.853758 | 1.360523  |
| C O  | 1.330614  | -0.482974 | -0.820486 |
| C O  | 0.922570  | -1.619738 | 0.103223  |
| H O  | 2.427245  | 1.380103  | -0.302040 |
| H O  | 1.439501  | 1.031414  | 2.149048  |
| H O  | 0.118714  | -1.267329 | 2.223862  |
| H O  | 1.751111  | -0.677240 | -1.803624 |
| H O  | 0.127047  | -2.275252 | -0.251711 |
| H O  | 1.811165  | -2.248787 | 0.281630  |
| C O  | -1.417153 | -0.172574 | -0.164464 |
| C O  | -0.537298 | 0.187352  | -1.214451 |
| C O  | -1.632228 | 1.209476  | 0.292246  |
| C O  | -0.691926 | 1.679600  | -0.854311 |
| O O  | -2.320028 | 1.773012  | 1.109742  |
| Cl O | -2.427245 | -1.581606 | 0.060929  |
| H O  | -0.560267 | -0.210578 | -2.223862 |
| H O  | 0.221391  | 2.205811  | -0.551956 |
| H O  | -1.235876 | 2.275252  | -1.595855 |

#### TS-46+CP

B3LYP/6-31G(d) Geometry

|     |           |           |           |
|-----|-----------|-----------|-----------|
| C O | -1.845888 | 1.562305  | -0.328584 |
| C O | -0.778245 | 1.858573  | -1.187859 |
| C O | 0.425945  | 1.564231  | -0.530937 |
| C O | -1.332232 | 1.093529  | 0.892386  |
| C O | 0.115685  | 1.524486  | 0.944723  |
| H O | -2.896120 | 1.578714  | -0.598485 |
| H O | -0.873097 | 2.152210  | -2.227683 |
| H O | 1.411597  | 1.790504  | -0.922360 |
| H O | -1.938031 | 0.916052  | 1.774580  |
| H O | 0.152770  | 2.554019  | 1.338095  |
| H O | 0.787460  | 0.918644  | 1.554262  |
| C O | 0.338870  | -0.679925 | -0.568910 |
| C O | -0.651440 | -0.974876 | 0.427507  |
| C O | 1.743004  | -0.875177 | -0.472172 |
| C O | -0.568901 | -1.102842 | -1.741206 |
| C O | -1.607262 | -1.414519 | -0.636474 |
| C O | -0.540202 | -1.538137 | 1.817022  |
| O O | -2.708458 | -1.910045 | -0.633138 |
| N O | 2.896120  | -1.029158 | -0.388302 |
| H O | -0.251189 | -2.006329 | -2.274562 |
| H O | -0.831351 | -0.323693 | -2.466233 |
| H O | -1.529424 | -1.603328 | 2.280632  |
| H O | 0.113062  | -0.947520 | 2.466233  |
| H O | -0.126284 | -2.554019 | 1.776924  |

#### TS-47+CP

B3LYP/6-31G(d) Geometry

|     |           |           |           |
|-----|-----------|-----------|-----------|
| C O | -1.587893 | -0.739062 | -1.207602 |
| C O | -1.177919 | -1.753670 | -0.325350 |
| C O | -0.877333 | -1.182070 | 0.908975  |
| C O | -1.456316 | 0.506701  | -0.561261 |
| C O | -1.477166 | 0.198679  | 0.922851  |
| H O | -1.827975 | -0.882007 | -2.255788 |
| H O | -1.021356 | -2.793614 | -0.590471 |
| H O | -0.586480 | -1.730617 | 1.797781  |
| H O | -1.892988 | 1.417599  | -0.961349 |
| H O | -0.994081 | 0.930313  | 1.571446  |
| H O | -2.528582 | 0.118005  | 1.248188  |
| C O | 1.175530  | 0.039711  | 0.395628  |
| C O | 0.605544  | 0.872619  | -0.620920 |
| C O | 1.780414  | -0.859504 | -0.607336 |
| C O | 1.209912  | 0.008865  | -1.751901 |
| O O | 2.528582  | -1.814717 | -0.565359 |
| C O | 1.659638  | 0.292998  | 1.793768  |
| C O | 0.583974  | 2.382675  | -0.633241 |
| H O | 0.508992  | -0.472919 | -2.445001 |
| H O | 2.006365  | 0.496890  | -2.329703 |
| H O | 0.905965  | 0.748350  | 2.445001  |
| H O | 2.524720  | 0.972273  | 1.784339  |
| H O | 1.990567  | -0.644161 | 2.253352  |
| H O | 1.610064  | 2.772545  | -0.696056 |
| H O | 0.133745  | 2.793614  | 0.277778  |
| H O | 0.031418  | 2.778718  | -1.492022 |

#### TS-48+CP

B3LYP/6-31G(d) Geometry

|     |          |           |           |
|-----|----------|-----------|-----------|
| C O | 1.349328 | 0.499437  | 1.094900  |
| C O | 1.029649 | -0.866983 | 1.155974  |
| C O | 1.140756 | -1.413427 | -0.120744 |
| C O | 1.598267 | 0.852292  | -0.247946 |
| C O | 1.942008 | -0.447433 | -0.954014 |

|     |           |           |           |
|-----|-----------|-----------|-----------|
| H O | 1.279192  | 1.196168  | 1.923704  |
| H O | 0.651702  | -1.387286 | 2.029568  |
| H O | 0.997072  | -2.459039 | -0.367661 |
| H O | 2.062045  | 1.795820  | -0.523973 |
| H O | 1.757141  | -0.473122 | -2.029568 |
| H O | 3.013267  | -0.654176 | -0.790846 |
| C O | -0.731239 | -0.352031 | -1.184458 |
| C O | -0.282055 | 0.979184  | -1.096354 |
| C O | -1.826275 | -0.594624 | -0.230951 |
| O O | -2.523770 | -1.592397 | -0.138483 |
| C O | -1.960098 | 0.673806  | 0.628678  |
| C O | -1.198665 | 1.762520  | -0.151302 |
| H O | -0.579564 | -1.014643 | -2.027951 |
| H O | 0.109994  | 1.491992  | -1.971467 |
| H O | -1.494972 | 0.479993  | 1.604210  |
| H O | -3.013267 | 0.904431  | 0.812775  |
| H O | -0.656117 | 2.459039  | 0.496847  |
| H O | -1.896716 | 2.363143  | -0.749745 |

#### TS-49+CP

B3LYP/6-31G(d) Geometry

|     |           |           |           |
|-----|-----------|-----------|-----------|
| C O | -1.437986 | -1.196730 | 0.461218  |
| C O | -1.020281 | -0.274512 | 1.433764  |
| C O | -0.914310 | 0.984171  | 0.847809  |
| C O | -1.516882 | -0.535752 | -0.788433 |
| C O | -1.671502 | 0.935734  | -0.451726 |
| H O | -1.535351 | -2.266541 | 0.612939  |
| H O | -0.726292 | -0.519390 | 2.448969  |
| H O | -0.646480 | 1.897526  | 1.366481  |
| H O | -2.024837 | -0.981087 | -1.640688 |
| H O | -1.359312 | 1.639906  | -1.222915 |
| H O | -2.736585 | 1.130000  | -0.239189 |
| C O | 1.041703  | 0.590728  | -0.622795 |
| C O | 0.401509  | -0.381092 | -1.430789 |
| C O | 1.940885  | -0.089007 | 0.335469  |
| O O | 2.724789  | 0.452325  | 1.101795  |
| C O | 1.316744  | 2.032910  | -0.958837 |
| C O | 1.768757  | -1.601810 | 0.154286  |
| C O | 1.056072  | -1.747964 | -1.202648 |
| H O | 0.112043  | -0.124663 | -2.448969 |
| H O | 1.619800  | 2.578497  | -0.060314 |
| H O | 0.465561  | 2.544588  | -1.417581 |
| H O | 2.153001  | 2.103187  | -1.669584 |
| H O | 1.150109  | -1.987753 | 0.974870  |
| H O | 2.736585  | -2.108140 | 0.213018  |
| H O | 0.342283  | -2.578497 | -1.228772 |
| H O | 1.789566  | -1.930355 | -1.999685 |

#### TS-50+CP

B3LYP/6-31G(d) Geometry

|     |           |           |           |
|-----|-----------|-----------|-----------|
| C O | 1.273906  | -0.966789 | 1.185508  |
| C O | 0.760833  | -2.044685 | 0.451038  |
| C O | 0.911700  | -1.770108 | -0.911227 |
| C O | 1.705066  | 0.035937  | 0.290264  |
| C O | 1.940649  | -0.677261 | -1.029062 |
| H O | 1.219807  | -0.862301 | 2.264259  |
| H O | 0.224434  | -2.892341 | 0.863776  |
| H O | 0.649695  | -2.449971 | -1.714081 |
| H O | 2.318843  | 0.873964  | 0.609796  |
| H O | 1.884929  | -0.063275 | -1.928829 |
| H O | 2.943131  | -1.136721 | -0.998723 |
| C O | -0.635564 | -0.035890 | -1.188998 |
| C O | -0.069780 | 0.957703  | -0.353804 |

|     |           |           |           |
|-----|-----------|-----------|-----------|
| C O | -1.828476 | -0.637430 | -0.571931 |
| O O | -2.630863 | -1.396073 | -1.092656 |
| C O | 0.528562  | 2.234933  | -0.914769 |
| C O | -1.906685 | -0.105888 | 0.868146  |
| C O | -0.969762 | 1.115052  | 0.885026  |
| H O | -0.500168 | -0.084050 | -2.264259 |
| H O | -0.274535 | 2.892341  | -1.275191 |
| H O | 1.201250  | 2.048660  | -1.758037 |
| H O | 1.084855  | 2.792083  | -0.152148 |
| H O | -1.561772 | -0.893435 | 1.550028  |
| H O | -2.943131 | 0.120452  | 1.135256  |
| H O | -0.399003 | 1.213593  | 1.814666  |
| H O | -1.550869 | 2.041702  | 0.774320  |

#### TS-51+CP

B3LYP/6-31G(d) Geometry

|     |           |           |           |
|-----|-----------|-----------|-----------|
| C O | -0.330094 | 1.660386  | 1.131317  |
| C O | 0.638714  | 2.043365  | 0.196878  |
| C O | 0.181951  | 1.706472  | -1.093641 |
| C O | -1.419797 | 1.093289  | 0.451866  |
| C O | -1.318267 | 1.549294  | -0.983292 |
| H O | -0.211016 | 1.695552  | 2.209137  |
| H O | 1.632117  | 2.411069  | 0.430195  |
| H O | 0.686618  | 2.008359  | -2.005508 |
| H O | -2.355431 | 0.805835  | 0.919050  |
| H O | -1.798949 | 0.907661  | -1.723254 |
| H O | -1.773109 | 2.550580  | -1.061000 |
| C O | 0.400276  | -0.426103 | -1.144265 |
| C O | -0.514831 | -0.889789 | -0.164285 |
| C O | 1.791010  | -0.645206 | -0.661717 |
| O O | 2.809035  | -0.520927 | -1.314014 |
| C O | -1.774630 | -1.462758 | -0.520636 |
| C O | 1.710662  | -1.067588 | 0.811692  |
| C O | 0.240181  | -1.460167 | 1.050711  |
| N O | -2.809035 | -1.925784 | -0.793693 |
| H O | 0.200273  | -0.465192 | -2.209137 |
| H O | 2.014886  | -0.216477 | 1.433002  |
| H O | 2.419940  | -1.876880 | 1.006819  |
| H O | -0.155799 | -1.088477 | 1.999935  |
| H O | 0.123831  | -2.550580 | 1.061878  |

#### TS-52+CP

B3LYP/6-31G(d) Geometry

|      |           |           |           |
|------|-----------|-----------|-----------|
| C O  | 1.965366  | 0.185509  | 0.189509  |
| C O  | 1.367500  | -0.237340 | 1.388518  |
| C O  | 0.699353  | -1.434145 | 1.159609  |
| C O  | 1.591298  | -0.704979 | -0.848531 |
| C O  | 1.189640  | -1.991188 | -0.145857 |
| H O  | 2.500824  | 1.119064  | 0.052138  |
| H O  | 1.348789  | 0.325371  | 2.315794  |
| H O  | 0.140394  | -2.000125 | 1.895281  |
| H O  | 2.117935  | -0.718887 | -1.800039 |
| H O  | 0.492545  | -2.639194 | -0.676906 |
| H O  | 2.105691  | -2.574101 | 0.048737  |
| C O  | -1.143537 | -0.584093 | -0.351567 |
| C O  | -0.261594 | -0.150917 | -1.367796 |
| C O  | -1.641347 | 0.538334  | 0.465440  |
| O O  | -2.500824 | 0.512645  | 1.326564  |
| Cl O | -2.079533 | -2.066717 | -0.433548 |
| C O  | -0.888660 | 1.782301  | -0.030320 |
| C O  | -0.312824 | 1.380801  | -1.402974 |
| H O  | -0.247362 | -0.682833 | -2.315794 |
| H O  | -0.092630 | 2.025720  | 0.684229  |

H O -1.567258 2.639194 -0.065079  
H O 0.659612 1.837864 -1.613466  
H O -0.996977 1.688520 -2.204177

#### TS-53+CP

B3LYP/6-31G(d) Geometry

C O 0.173152 1.969784 -1.023421  
C O -0.811656 2.048338 -0.035038  
C O -0.340555 1.406749 1.128318  
C O 1.284619 1.279369 -0.499804  
C O 1.164335 1.362632 1.001743  
H O 0.053533 2.277560 -2.056815  
H O -1.820947 2.420176 -0.175940  
H O -0.863003 1.425349 2.078946  
H O 2.236444 1.180816 -1.011441  
H O 1.686050 0.588238 1.563747  
H O 1.563257 2.336585 1.329905  
C O -0.439300 -0.726092 0.605961  
C O 0.525807 -0.790520 -0.447512  
C O -1.800116 -0.796048 -0.012557  
O O -2.847000 -0.909805 0.597285  
C O -0.278988 -1.325768 1.984028  
C O 1.801716 -1.402252 -0.231838  
C O -1.651841 -0.743476 -1.535140  
C O -0.162605 -1.020021 -1.806935  
N O 2.847000 -1.889769 -0.063951  
H O -1.147475 -1.073788 2.598531  
H O -0.233580 -2.420176 1.912699  
H O 0.631233 -0.998854 2.492621  
H O -1.956301 0.249633 -1.885692  
H O -2.326800 -1.468430 -1.999027  
H O -0.011636 -2.063006 -2.111143  
H O 0.255824 -0.392156 -2.598531

#### TS-54+CP

B3LYP/6-31G(d) Geometry

C O -1.442157 -1.185772 -1.130528  
C O -0.873074 -2.071484 -0.206434  
C O -0.789030 -1.434746 1.034108  
C O -1.659304 0.061051 -0.493489  
C O -1.727223 -0.260089 0.987640  
H O -1.555130 -1.375434 -2.192873  
H O -0.457058 -3.045926 -0.439583  
H O -0.428900 -1.894148 1.947740  
H O -2.285240 0.830356 -0.939358  
H O -1.509840 0.561093 1.670173  
H O -2.745086 -0.617346 1.218912  
C O 0.905598 0.222521 0.579552  
C O 0.187511 0.967709 -0.403334  
C O 1.884683 -0.667680 -0.084294  
O O 2.745086 -1.337442 0.468556  
C O 1.193567 0.641377 1.997952  
C O 1.682602 -0.556064 -1.598522  
C O 0.833709 0.712686 -1.776780  
C O -0.246075 2.398212 -0.136747  
H O 1.749808 -0.153559 2.503276  
H O 0.300384 0.876821 2.584769  
H O 1.827249 1.540828 2.011946  
H O 1.159998 -1.451305 -1.957411  
H O 2.650539 -0.523165 -2.107552  
H O 0.097601 0.636689 -2.584769  
H O 1.480582 1.568490 -2.018331  
H O 0.637120 3.045926 -0.043478

H O -0.823383 2.501160 0.787503  
H O -0.852593 2.792282 -0.960087

#### TS-55+CP

B3LYP/6-31G(d) Geometry

C O 0.512738 -0.700656 1.186171  
C O 0.512776 0.700621 1.186209  
C O 0.826397 1.156229 -0.103402  
C O 0.826301 -1.156213 -0.103479  
C O 1.477490 0.000009 -0.827283  
H O 0.192651 -1.328437 2.010139  
H O 0.192722 1.328377 2.010210  
H O 0.997001 2.196944 -0.356531  
H O 0.996899 -2.196924 -0.356634  
H O 2.551917 -0.000046 -0.580099  
H O 1.386755 0.000051 -1.915225  
C O -1.063219 0.699392 -1.181527  
C O -1.063181 -0.699373 -1.181506  
C O -2.071203 -1.142244 -0.192529  
C O -2.071220 1.142255 -0.192543  
O O -2.551917 -0.000003 0.459650  
O O -2.467599 -2.241653 0.084757  
O O -2.467640 2.241653 0.084749  
H O -0.805852 1.345640 -2.010207  
H O -0.805856 -1.345611 -2.010210

#### TS-56+CP

B3LYP/6-31G(d) Geometry

C O 0.646845 -0.980947 1.073966  
C O 0.984646 0.376307 1.194988  
C O 1.314989 0.882429 -0.075766  
C O 0.808937 -1.368781 -0.255201  
C O 1.660614 -0.323294 -0.928185  
H O 0.211539 -1.591805 1.856809  
H O 0.875537 0.966800 2.098436  
H O 1.784564 1.851209 -0.223657  
H O 0.674633 -2.377306 -0.629388  
H O 2.720847 -0.573581 -0.757060  
H O 1.516028 -0.208127 -2.004523  
C O -0.578477 1.100265 -0.990973  
C O -1.006896 -0.214656 -1.197816  
C O -2.072910 -0.528037 -0.229414  
O O -2.720847 -1.535218 -0.074651  
C O -1.526446 1.696172 0.034215  
O O -2.242394 0.580181 0.581474  
H O -0.196094 1.729309 -1.788412  
H O -0.897787 -0.802256 -2.098436  
H O -2.245171 2.377306 -0.443152  
H O -1.042300 2.226161 0.858470

#### TS-57+CP

B3LYP/6-31G(d) Geometry

C O -1.257629 0.719751 1.314177  
C O -1.573117 -0.604857 0.974577  
C O -1.835587 -0.672395 -0.410222  
C O -1.384379 1.517876 0.176847  
C O -2.208463 0.741819 -0.818208  
H O -0.865712 1.049679 2.270506  
H O -1.490571 -1.459217 1.638203  
H O -2.291566 -1.543411 -0.874301  
H O -1.241919 2.591942 0.147795  
H O -3.274823 0.895810 -0.581704  
H O -2.059775 0.995461 -1.869194

|     |           |           |           |
|-----|-----------|-----------|-----------|
| C O | 0.042778  | -0.582847 | -1.301584 |
| C O | 0.444808  | 0.757556  | -1.114783 |
| C O | 1.610950  | 1.143899  | -0.301952 |
| O O | 1.986537  | 2.308724  | -0.221135 |
| C O | 0.890251  | -1.704058 | -0.715527 |
| C O | 2.420257  | 0.020930  | 0.349863  |
| C O | 1.638359  | -1.282225 | 0.556403  |
| H O | -0.395253 | -0.821258 | -2.270506 |
| H O | 0.155174  | 1.518743  | -1.832332 |
| H O | 1.623492  | -2.006769 | -1.479946 |
| H O | 0.276245  | -2.591942 | -0.518953 |
| H O | 2.843599  | 0.399814  | 1.286308  |
| H O | 3.274823  | -0.157883 | -0.321093 |
| H O | 2.318840  | -2.083356 | 0.870497  |
| H O | 0.920181  | -1.149032 | 1.372256  |

#### TS-58+CP

B3LYP/6-31G(d) Geometry

|     |           |           |           |
|-----|-----------|-----------|-----------|
| C O | 1.230922  | -0.360077 | -1.462747 |
| C O | 1.597277  | -1.368162 | -0.560200 |
| C O | 1.830178  | -0.781116 | 0.707981  |
| C O | 1.313574  | 0.873665  | -0.816240 |
| C O | 2.163479  | 0.669695  | 0.409205  |
| H O | 0.840583  | -0.519204 | -2.462523 |
| H O | 1.561580  | -2.433814 | -0.759175 |
| H O | 2.326258  | -1.325695 | 1.508351  |
| H O | 1.118377  | 1.835459  | -1.276321 |
| H O | 3.223648  | 0.718151  | 0.107061  |
| H O | 2.021915  | 1.377005  | 1.224360  |
| C O | -0.023872 | -0.410353 | 1.470369  |
| C O | -0.526397 | 0.719796  | 0.768829  |
| C O | -1.625438 | 0.579820  | -0.215066 |
| O O | -2.091446 | 1.554414  | -0.798737 |
| C O | -0.784560 | -1.731553 | 1.426176  |
| C O | -2.301293 | -0.783982 | -0.377737 |
| C O | -1.479947 | -1.992015 | 0.083947  |
| C O | -0.411804 | 2.117033  | 1.353446  |
| H O | 0.372458  | -0.186131 | 2.462523  |
| H O | -1.544069 | -1.702287 | 2.223425  |
| H O | -0.118261 | -2.567702 | 1.674715  |
| H O | -2.627465 | -0.883260 | -1.418886 |
| H O | -3.223648 | -0.710280 | 0.219191  |
| H O | -2.126520 | -2.874696 | 0.167600  |
| H O | -0.731004 | -2.233449 | -0.675083 |
| H O | 0.343354  | 2.167752  | 2.143728  |
| H O | -1.371422 | 2.407857  | 1.802429  |
| H O | -0.189671 | 2.874696  | 0.596879  |

#### TS-59+CP

B3LYP/6-31G(d) Geometry

|     |           |           |           |
|-----|-----------|-----------|-----------|
| C O | 0.946639  | -1.734449 | 0.924315  |
| C O | 1.480797  | -0.515280 | 1.360631  |
| C O | 1.945900  | 0.208944  | 0.242354  |
| C O | 1.118304  | -1.826443 | -0.461791 |
| C O | 2.190262  | -0.835080 | -0.831901 |
| H O | 0.378880  | -2.430241 | 1.533027  |
| H O | 1.418794  | -0.130040 | 2.373155  |
| H O | 2.568776  | 1.094343  | 0.340296  |
| H O | 0.842688  | -2.682848 | -1.066631 |
| H O | 3.173445  | -1.297353 | -0.640591 |
| H O | 2.184789  | -0.484996 | -1.864097 |
| C O | 0.177192  | 0.955239  | -0.674127 |
| C O | -0.358459 | -0.232955 | -1.236544 |

|     |           |           |           |
|-----|-----------|-----------|-----------|
| C O | -1.643649 | -0.830751 | -0.830340 |
| O O | -2.129116 | -1.783305 | -1.431414 |
| C O | -0.623900 | 1.639578  | 0.435898  |
| C O | -2.415811 | -0.152858 | 0.301213  |
| C O | -1.545592 | 0.703390  | 1.227840  |
| C O | 0.834431  | 1.957155  | -1.616405 |
| H O | -0.077325 | -0.507918 | -2.250280 |
| H O | -1.241682 | 2.417179  | -0.043271 |
| H O | 0.049879  | 2.176739  | 1.115941  |
| H O | -2.970509 | -0.922069 | 0.849220  |
| H O | -3.173445 | 0.476945  | -0.190467 |
| H O | -2.181538 | 1.296259  | 1.897076  |
| H O | -0.946831 | 0.051458  | 1.870518  |
| H O | 1.459176  | 1.473590  | -2.373155 |
| H O | 1.452556  | 2.682848  | -1.074908 |
| H O | 0.060374  | 2.526618  | -2.149614 |

#### TS-60+CP

B3LYP/6-31G(d) Geometry

|     |           |           |           |
|-----|-----------|-----------|-----------|
| C O | 0.381069  | -2.112273 | 0.380942  |
| C O | 1.219583  | -1.405777 | 1.248767  |
| C O | 2.165154  | -0.696720 | 0.491470  |
| C O | 0.773789  | -1.841912 | -0.948127 |
| C O | 2.202231  | -1.349593 | -0.868086 |
| H O | -0.510954 | -2.658856 | 0.667852  |
| H O | 1.091363  | -1.328411 | 2.323302  |
| H O | 2.997099  | -0.138078 | 0.906691  |
| H O | 0.366110  | -2.361533 | -1.808880 |
| H O | 2.863781  | -2.229523 | -0.809599 |
| C O | 0.820914  | 0.938953  | -0.390593 |
| C O | 0.076273  | 0.120805  | -1.289028 |
| C O | -1.404270 | -0.028303 | -1.165729 |
| O O | -2.041706 | -0.652117 | -1.999823 |
| C O | 0.127753  | 1.620525  | 0.793334  |
| C O | -2.093058 | 0.691445  | -0.011535 |
| C O | -1.182810 | 0.932826  | 1.198956  |
| C O | 1.932036  | 1.672896  | -0.925891 |
| N O | 2.840341  | 2.275969  | -1.338854 |
| H O | 0.404595  | 0.071191  | -2.323302 |
| H O | -0.089700 | 2.658856  | 0.500981  |
| H O | 0.809417  | 1.684336  | 1.648508  |
| H O | -2.997099 | 0.132978  | 0.251822  |
| H O | -2.433042 | 1.656631  | -0.418446 |
| H O | -1.702050 | 1.554589  | 1.937552  |
| H O | -0.967862 | -0.019861 | 1.692659  |

#### TS-61+CP

B3LYP/6-31G(d) Geometry

|     |           |           |           |
|-----|-----------|-----------|-----------|
| C O | 1.466964  | -0.434367 | 1.455158  |
| C O | 2.077755  | 0.137073  | 0.328894  |
| C O | 1.914916  | -0.739500 | -0.774593 |
| C O | 1.006413  | -1.704960 | 1.118276  |
| C O | 1.688567  | -2.108441 | -0.157237 |
| H O | 1.291774  | 0.067421  | 2.400942  |
| H O | 2.479976  | 1.142914  | 0.274577  |
| H O | 2.495976  | -0.617722 | -1.686164 |
| H O | 0.487231  | -2.388364 | 1.779697  |
| H O | 2.674735  | -2.531258 | 0.098668  |
| H O | 1.163472  | -2.840246 | -0.768717 |
| C O | 0.022819  | -0.464995 | -1.404499 |
| C O | -0.827013 | -1.098652 | -0.462732 |
| C O | -1.701938 | -0.371395 | 0.483648  |



|      |           |           |           |
|------|-----------|-----------|-----------|
| O 0  | -2.448062 | -0.929504 | 1.273262  |
| C 0  | -0.158812 | 1.033143  | -1.640094 |
| C 0  | -1.747840 | 1.154666  | 0.339917  |
| C 0  | -0.560729 | 1.804526  | -0.377854 |
| Cl 0 | -1.382143 | -2.754258 | -0.811666 |
| H 0  | 0.173642  | -1.027672 | -2.324232 |
| H 0  | -0.945493 | 1.149878  | -2.400942 |
| H 0  | 0.753267  | 1.461919  | -2.074031 |
| H 0  | -1.906526 | 1.581610  | 1.335760  |
| H 0  | -2.674735 | 1.344807  | -0.222297 |
| H 0  | -0.807520 | 2.840246  | -0.642145 |
| H 0  | 0.291931  | 1.858261  | 0.304433  |

#### TS-62+CP

B3LYP/6-31G(d) Geometry

|     |           |           |           |
|-----|-----------|-----------|-----------|
| C 0 | 0.051801  | 2.117136  | -0.717850 |
| C 0 | 0.873412  | 1.612795  | -1.727866 |
| C 0 | 1.931940  | 0.900040  | -1.134222 |
| C 0 | 0.575473  | 1.720181  | 0.533931  |
| C 0 | 2.031442  | 1.398046  | 0.284172  |
| H 0 | -0.904207 | 2.608384  | -0.864686 |
| H 0 | 0.666690  | 1.658761  | -2.791751 |
| H 0 | 2.773147  | 0.482288  | -1.677578 |
| H 0 | 0.196890  | 2.092946  | 1.479613  |
| H 0 | 2.593031  | 2.346893  | 0.279937  |
| H 0 | 2.521601  | 0.730468  | 0.991108  |
| C 0 | 0.844938  | -0.934393 | -0.383038 |
| C 0 | 0.068454  | -0.358490 | 0.681364  |
| C 0 | -1.429104 | -0.252911 | 0.517761  |
| O 0 | -2.118536 | 0.251867  | 1.390623  |
| C 0 | 0.178781  | -1.528709 | -1.632458 |
| C 0 | -2.080799 | -0.886885 | -0.705150 |
| C 0 | -1.191870 | -0.922920 | -1.949667 |
| C 0 | 2.049489  | -1.632179 | -0.024398 |
| C 0 | 0.459187  | -0.599403 | 2.136122  |
| N 0 | 3.034032  | -2.202437 | 0.229641  |
| H 0 | 0.054828  | -2.608384 | -1.457494 |
| H 0 | 0.848745  | -1.438807 | -2.494685 |
| H 0 | -3.034032 | -0.379564 | -0.884210 |
| H 0 | -2.329615 | -1.916550 | -0.401825 |
| H 0 | -1.674278 | -1.514540 | -2.736736 |
| H 0 | -1.076177 | 0.087832  | -2.349769 |
| H 0 | 1.533623  | -0.510534 | 2.305638  |
| H 0 | 0.172868  | -1.617958 | 2.429890  |
| H 0 | -0.074953 | 0.090264  | 2.791751  |

#### TS-63+CP

B3LYP/6-31G(d) Geometry

|     |           |           |           |
|-----|-----------|-----------|-----------|
| C 0 | -0.837784 | -0.152152 | -2.174020 |
| C 0 | -1.396698 | 1.004763  | -1.620581 |
| C 0 | -1.904368 | 0.695770  | -0.334687 |
| C 0 | -1.049666 | -1.218547 | -1.290788 |
| C 0 | -2.164760 | -0.797505 | -0.372823 |
| H 0 | -0.234237 | -0.195236 | -3.074617 |
| H 0 | -1.322586 | 2.002306  | -2.040274 |
| H 0 | -2.558085 | 1.376997  | 0.205012  |
| H 0 | -0.765895 | -2.247496 | -1.480464 |
| H 0 | -3.123819 | -0.964149 | -0.892248 |
| H 0 | -2.224971 | -1.306849 | 0.586679  |
| C 0 | -0.232357 | 0.561835  | 0.908403  |
| C 0 | 0.388168  | -0.667788 | 0.507309  |
| C 0 | 1.650806  | -0.670714 | -0.287938 |
| O 0 | 2.199814  | -1.716675 | -0.621056 |

|     |           |           |           |
|-----|-----------|-----------|-----------|
| C 0 | 0.525354  | 1.874448  | 0.670456  |
| C 0 | 2.358889  | 0.653860  | -0.566089 |
| C 0 | 1.459846  | 1.889361  | -0.541867 |
| C 0 | -0.945273 | 0.599147  | 2.258505  |
| C 0 | 0.227542  | -1.945095 | 1.316529  |
| H 0 | 1.126031  | 2.063935  | 1.575976  |
| H 0 | -0.186904 | 2.707985  | 0.610449  |
| H 0 | 2.907433  | 0.555905  | -1.508838 |
| H 0 | 3.123819  | 0.735034  | 0.222405  |
| H 0 | 2.071815  | 2.800075  | -0.521277 |
| H 0 | 0.875812  | 1.934454  | -1.464013 |
| H 0 | -0.215045 | 0.502135  | 3.074617  |
| H 0 | -1.680129 | -0.199340 | 2.386661  |
| H 0 | -1.462334 | 1.555157  | 2.398753  |
| H 0 | -0.794091 | -2.134029 | 1.652392  |
| H 0 | 0.851999  | -1.897026 | 2.221720  |
| H 0 | 0.576902  | -2.800075 | 0.735254  |

#### TS-64+CP

B3LYP/6-31G(d) Geometry

|     |           |           |           |
|-----|-----------|-----------|-----------|
| C 0 | 1.286806  | -1.502224 | -0.056843 |
| C 0 | 0.278058  | -0.877968 | -1.009714 |
| O 0 | 1.375927  | -0.706215 | 1.134583  |
| C 0 | 2.736192  | -1.379488 | -0.583166 |
| C 0 | 2.086483  | 0.426656  | 0.676400  |
| C 0 | 0.296011  | 0.529256  | -1.089608 |
| O 0 | 3.145062  | -0.080463 | -0.142082 |
| C 0 | 1.182901  | 1.302996  | -0.212399 |
| O 0 | 1.298939  | 2.520768  | -0.224675 |
| H 0 | 1.021266  | -2.520768 | 0.235640  |
| H 0 | 0.106059  | -1.440897 | -1.926783 |
| H 0 | 2.808634  | -1.442700 | -1.673815 |
| H 0 | 3.385619  | -2.138945 | -0.129920 |
| H 0 | 2.498553  | 0.980673  | 1.522164  |
| H 0 | -0.070693 | 1.053099  | -1.965854 |
| C 0 | -1.589492 | -1.362826 | -0.243777 |
| C 0 | -1.509648 | -0.952657 | 1.101131  |
| C 0 | -2.298594 | -0.237614 | -0.977895 |
| C 0 | -1.894963 | 0.929720  | -0.116503 |
| C 0 | -1.650638 | 0.443925  | 1.162036  |
| H 0 | -1.713964 | -2.403779 | -0.531994 |
| H 0 | -1.234988 | -1.586148 | 1.936527  |
| H 0 | -2.079541 | -0.145359 | -2.043543 |
| H 0 | -3.385619 | -0.390412 | -0.872852 |
| H 0 | -2.071760 | 1.968093  | -0.371941 |
| H 0 | -1.480186 | 1.052096  | 2.043543  |

#### TS-65+CP

B3LYP/6-31G(d) Geometry

|     |           |           |           |
|-----|-----------|-----------|-----------|
| C 0 | -1.293635 | -1.585416 | 0.720847  |
| C 0 | -0.246947 | -0.619489 | 1.261851  |
| O 0 | -1.383969 | -1.452330 | -0.705475 |
| C 0 | -2.728096 | -1.176963 | 1.128119  |
| C 0 | -2.041692 | -0.212160 | -0.838193 |
| C 0 | -0.259144 | 0.694539  | 0.723289  |
| O 0 | -3.107154 | -0.232458 | 0.120142  |
| C 0 | -1.114765 | 0.954562  | -0.451174 |
| O 0 | -1.223637 | 2.042025  | -1.003881 |
| C 0 | 0.086579  | 1.919619  | 1.543227  |
| H 0 | -1.062415 | -2.629067 | 0.947815  |
| H 0 | -0.090325 | -0.700335 | 2.339396  |
| H 0 | -2.781178 | -0.709017 | 2.116630  |
| H 0 | -3.409207 | -2.036555 | 1.095284  |

|     |           |           |           |
|-----|-----------|-----------|-----------|
| H O | -2.446762 | -0.103292 | -1.846007 |
| H O | 0.725352  | 1.679161  | 2.398334  |
| H O | -0.833130 | 2.371579  | 1.940721  |
| H O | 0.572177  | 2.691822  | 0.940404  |
| C O | 1.524658  | -1.477298 | 0.764018  |
| C O | 1.401562  | -1.757865 | -0.617180 |
| C O | 2.342553  | -0.199152 | 0.841785  |
| C O | 1.932614  | 0.446932  | -0.453058 |
| C O | 1.596047  | -0.569744 | -1.338370 |
| H O | 1.635409  | -2.267244 | 1.503910  |
| H O | 1.052488  | -2.691822 | -1.041108 |
| H O | 2.216229  | 0.399757  | 1.742868  |
| H O | 3.409207  | -0.471483 | 0.774193  |
| H O | 2.159473  | 1.471015  | -0.726321 |
| H O | 1.404532  | -0.442838 | -2.398334 |

#### TS-66+CP

B3LYP/6-31G(d) Geometry

|     |           |           |           |
|-----|-----------|-----------|-----------|
| C O | -1.287132 | 0.771083  | 0.460401  |
| C O | -0.277065 | 0.636280  | -0.683545 |
| O O | -1.377460 | -0.457515 | 1.194913  |
| C O | -2.749293 | 0.890802  | -0.035472 |
| C O | -2.098934 | -1.281387 | 0.303453  |
| C O | -0.289116 | -0.630617 | -1.324617 |
| O O | -3.160912 | -0.469614 | -0.206035 |
| C O | -1.204393 | -1.690001 | -0.880733 |
| O O | -1.337649 | -2.776262 | -1.427784 |
| C O | -0.114807 | 1.895996  | -1.524414 |
| H O | -1.012148 | 1.565120  | 1.159641  |
| H O | -2.858249 | 1.429414  | -0.981025 |
| H O | -3.377182 | 1.369873  | 0.726268  |
| H O | -2.506339 | -2.144821 | 0.833075  |
| H O | 0.065062  | -0.731804 | -2.346758 |
| H O | 0.097782  | 2.776262  | -0.905829 |
| H O | -1.028351 | 2.108355  | -2.094200 |
| H O | 0.694294  | 1.793179  | -2.253141 |
| C O | 1.588651  | 0.639931  | 0.278026  |
| C O | 1.441021  | -0.292510 | 1.327082  |
| C O | 2.294298  | -0.116237 | -0.835333 |
| C O | 1.773157  | -1.502775 | -0.567235 |
| C O | 1.515421  | -1.588420 | 0.800597  |
| H O | 1.773385  | 1.695740  | 0.460496  |
| H O | 1.163489  | -0.051529 | 2.346758  |
| H O | 2.148845  | 0.259774  | -1.848533 |
| H O | 3.377182  | -0.101005 | -0.628431 |
| H O | 1.913207  | -2.347818 | -1.231689 |
| H O | 1.277400  | -2.498508 | 1.340031  |

#### TS-67+CP

B3LYP/6-31G(d) Geometry

|     |           |           |           |
|-----|-----------|-----------|-----------|
| C O | -1.294739 | 0.667787  | 0.670209  |
| C O | -0.261775 | 0.639330  | -0.462594 |
| O O | -1.549465 | -0.670853 | 1.109591  |
| C O | -2.695223 | 1.066809  | 0.158579  |
| C O | -2.313432 | -1.196865 | 0.042033  |
| C O | -0.307537 | -0.481427 | -1.337669 |
| O O | -3.217936 | -0.167249 | -0.353067 |
| C O | -1.384392 | -1.491720 | -1.147150 |
| O O | -1.561922 | -2.440891 | -1.889001 |
| C O | 0.130540  | 1.919585  | -0.966399 |
| N O | 0.446960  | 2.976329  | -1.344340 |
| H O | -0.960127 | 1.256514  | 1.525669  |
| H O | -2.675857 | 1.816972  | -0.636581 |

|     |           |           |           |
|-----|-----------|-----------|-----------|
| H O | -3.326436 | 1.419457  | 0.983261  |
| H O | -2.859348 | -2.083880 | 0.370112  |
| H O | 0.010223  | -0.362739 | -2.368859 |
| C O | 1.744349  | 0.213318  | 0.561335  |
| C O | 1.381473  | -0.911696 | 1.313440  |
| C O | 2.261281  | -0.292590 | -0.763547 |
| C O | 1.474920  | -1.580000 | -0.868290 |
| C O | 1.230352  | -2.003267 | 0.451200  |
| H O | 2.018199  | 1.176983  | 0.977531  |
| H O | 1.134802  | -0.912261 | 2.368859  |
| H O | 2.181228  | 0.400082  | -1.602848 |
| H O | 3.326436  | -0.549173 | -0.644522 |
| H O | 1.537674  | -2.254614 | -1.715576 |
| H O | 0.843648  | -2.976329 | 0.733157  |

#### TS-68+CP

B3LYP/6-31G(d) Geometry

|      |           |           |           |
|------|-----------|-----------|-----------|
| C O  | 1.326388  | -0.931803 | -1.043757 |
| C O  | 0.176367  | 0.047919  | -1.267486 |
| O O  | 1.459955  | -1.204966 | 0.356176  |
| C O  | 2.702001  | -0.290817 | -1.344038 |
| C O  | 2.035985  | -0.007740 | 0.831087  |
| C O  | 0.146097  | 1.136911  | -0.362328 |
| O O  | 3.066439  | 0.320950  | -0.100353 |
| C O  | 1.024590  | 1.162454  | 0.816652  |
| O O  | 1.093170  | 2.051515  | 1.648322  |
| Cl O | -0.457047 | 2.713260  | -0.896748 |
| H O  | 1.167381  | -1.880477 | -1.561661 |
| H O  | -0.006418 | 0.287892  | -2.314280 |
| H O  | 2.663688  | 0.464028  | -2.135853 |
| H O  | 3.446656  | -1.053486 | -1.601731 |
| H O  | 2.460856  | -0.158396 | 1.824775  |
| C O  | -1.480517 | -1.042741 | -1.017394 |
| C O  | -1.275466 | -1.732447 | 0.202957  |
| C O  | -2.409685 | 0.111872  | -0.676663 |
| C O  | -2.044752 | 0.330104  | 0.762290  |
| C O  | -1.559821 | -0.864169 | 1.270997  |
| H O  | -1.564194 | -1.574154 | -1.963245 |
| H O  | -0.826248 | -2.713260 | 0.303457  |
| H O  | -2.349534 | 0.990946  | -1.317683 |
| H O  | -3.446656 | -0.260408 | -0.720688 |
| H O  | -2.329263 | 1.201580  | 1.340003  |
| H O  | -1.341206 | -1.063479 | 2.314280  |

#### TS-69+CP

B3LYP/6-31G(d) Geometry

|     |           |           |           |
|-----|-----------|-----------|-----------|
| C O | 1.304914  | 0.667034  | -1.104459 |
| C O | 0.213200  | 0.644673  | -0.024315 |
| O O | 1.578816  | -0.667998 | -1.540315 |
| C O | 2.679002  | 1.056536  | -0.522257 |
| C O | 2.270338  | -1.202584 | -0.433399 |
| C O | 0.233777  | -0.434673 | 0.922590  |
| O O | 3.162079  | -0.182341 | 0.018109  |
| C O | 1.287205  | -1.484147 | 0.712206  |
| O O | 1.427886  | -2.450638 | 1.440739  |
| C O | -0.188614 | 1.949035  | 0.413454  |
| C O | -0.101547 | -0.213260 | 2.389085  |
| N O | -0.510560 | 3.023532  | 0.731405  |
| H O | 1.014652  | 1.262084  | -1.971892 |
| H O | 2.625285  | 1.808181  | 0.269930  |
| H O | 3.355963  | 1.402168  | -1.312976 |
| H O | 2.824764  | -2.095860 | -0.728126 |
| H O | -0.994185 | 0.399611  | 2.531407  |

|     |           |           |           |
|-----|-----------|-----------|-----------|
| H O | 0.730498  | 0.305356  | 2.882875  |
| H O | -0.232997 | -1.172137 | 2.894389  |
| C O | -1.646252 | 0.185518  | -1.187873 |
| C O | -1.246622 | -0.978691 | -1.867601 |
| C O | -2.308661 | -0.267563 | 0.088623  |
| C O | -1.545002 | -1.550679 | 0.322478  |
| C O | -1.192664 | -2.032952 | -0.953246 |
| H O | -1.874126 | 1.131414  | -1.668653 |
| H O | -0.903695 | -1.023950 | -2.894389 |
| H O | -2.320044 | 0.457698  | 0.901692  |
| H O | -3.355963 | -0.528408 | -0.134382 |
| H O | -1.694379 | -2.189710 | 1.186193  |
| H O | -0.801895 | -3.023532 | -1.158970 |

#### TS-70+CP

B3LYP/6-31G(d) Geometry

|     |           |           |           |
|-----|-----------|-----------|-----------|
| C O | -1.294674 | -1.169942 | -0.612778 |
| C O | -0.227341 | -0.734786 | 0.399930  |
| O O | -1.394510 | -0.228171 | -1.687801 |
| C O | -2.732752 | -1.081194 | -0.046294 |
| C O | -2.045106 | 0.853382  | -1.062657 |
| C O | -0.221368 | 0.665674  | 0.708031  |
| O O | -3.109181 | 0.278109  | -0.295986 |
| C O | -1.104915 | 1.561223  | -0.074322 |
| O O | -1.209240 | 2.767808  | 0.109599  |
| C O | -0.053328 | -1.741299 | 1.532722  |
| C O | 0.132519  | 1.209116  | 2.077940  |
| H O | -1.068685 | -2.149682 | -1.042528 |
| H O | -2.803253 | -1.292773 | 1.024667  |
| H O | -3.408292 | -1.752250 | -0.591392 |
| H O | -2.449580 | 1.538254  | -1.810115 |
| H O | -0.022193 | -2.767808 | 1.148330  |
| H O | -0.882945 | -1.682079 | 2.249413  |
| H O | 0.865818  | -1.573341 | 2.099549  |
| H O | 1.036756  | 0.771565  | 2.508989  |
| H O | -0.685139 | 1.013403  | 2.788120  |
| H O | 0.254374  | 2.293158  | 2.023386  |
| C O | 1.518434  | -1.061114 | -0.633642 |
| C O | 1.330573  | -0.446901 | -1.896857 |
| C O | 2.350246  | -0.072033 | 0.163499  |
| C O | 1.856240  | 1.214200  | -0.437912 |
| C O | 1.491114  | 0.936077  | -1.754840 |
| H O | 1.665756  | -2.134537 | -0.534623 |
| H O | 0.963724  | -0.941615 | -2.788120 |
| H O | 2.292734  | -0.151794 | 1.247907  |
| H O | 3.408292  | -0.206839 | -0.116359 |
| H O | 2.074614  | 2.199758  | -0.042614 |
| H O | 1.247135  | 1.676437  | -2.509004 |

#### P-1+CP

B3LYP/6-31G(d) Geometry

|     |           |           |           |
|-----|-----------|-----------|-----------|
| C O | 0.741280  | 1.428549  | -0.048026 |
| C O | 1.469223  | 0.906145  | -1.044746 |
| C O | 1.777124  | -0.539500 | -0.683439 |
| C O | 0.426596  | -1.323262 | -0.812426 |
| C O | 0.556793  | 0.340366  | 0.999237  |
| C O | -0.421034 | -0.738429 | 0.376332  |
| C O | 1.893525  | -0.421926 | 0.854694  |
| C O | -1.718736 | -0.193715 | -0.020402 |
| N O | -2.751032 | 0.240301  | -0.329610 |
| H O | 0.258398  | 2.399142  | -0.019267 |
| H O | 1.704230  | 1.368251  | -1.998227 |
| H O | 2.609388  | -1.006940 | -1.214560 |

|     |           |           |           |
|-----|-----------|-----------|-----------|
| H O | 0.576773  | -2.399142 | -0.676040 |
| H O | -0.053466 | -1.168803 | -1.781264 |
| H O | 0.258692  | 0.664019  | 1.998227  |
| H O | -0.607767 | -1.519602 | 1.122553  |
| H O | 2.751032  | 0.177193  | 1.173563  |
| H O | 1.907629  | -1.389933 | 1.370904  |

#### P-2+CP

B3LYP/6-31G(d) Geometry

|     |           |           |           |
|-----|-----------|-----------|-----------|
| C O | 1.898692  | 0.688182  | -0.951995 |
| C O | 1.117129  | 1.382810  | -0.112321 |
| C O | 0.619572  | 0.417194  | 0.954807  |
| C O | -0.411921 | -0.578270 | 0.274316  |
| C O | 1.925199  | -0.752947 | -0.465842 |
| C O | 0.496855  | -1.338639 | -0.749193 |
| C O | 1.841593  | -0.526418 | 1.061085  |
| C O | -1.592350 | 0.114480  | -0.357511 |
| O O | -2.742278 | -0.016700 | 0.004393  |
| H O | 2.344487  | 1.038465  | -1.877792 |
| H O | 0.802677  | 2.417059  | -0.209209 |
| H O | 0.242175  | 0.862258  | 1.877792  |
| H O | -0.805713 | -1.257264 | 1.037054  |
| H O | 2.742278  | -1.375272 | -0.838117 |
| H O | 0.192682  | -1.174822 | -1.788802 |
| H O | 0.461159  | -2.417059 | -0.562903 |
| H O | 1.641902  | -1.440494 | 1.633332  |
| H O | 2.724446  | -0.021700 | 1.465335  |
| H O | -1.339255 | 0.784831  | -1.210342 |

#### P-3+CP

B3LYP/6-31G(d) Geometry

|     |           |           |           |
|-----|-----------|-----------|-----------|
| C O | 2.864137  | -0.602952 | -0.709500 |
| C O | 2.891595  | -0.589300 | 0.835503  |
| C O | 1.590662  | 0.239905  | 0.952330  |
| C O | 1.904106  | 1.378869  | -0.006452 |
| C O | 2.665585  | 0.878597  | -0.990459 |
| C O | 1.478674  | -1.290413 | -0.969314 |
| C O | 0.593596  | -0.762126 | 0.218430  |
| C O | -0.658066 | -0.112285 | -0.238729 |
| O O | -1.770979 | -0.480529 | 0.150351  |
| H O | 3.696823  | -1.087508 | -1.223890 |
| H O | 3.756490  | -0.057410 | 1.242065  |
| H O | 2.822082  | -1.585311 | 1.289012  |
| H O | 1.252958  | 0.517590  | 1.952489  |
| H O | 1.495335  | 2.381422  | 0.067608  |
| H O | 3.000327  | 1.389619  | -1.887554 |
| H O | 1.073516  | -1.030832 | -1.952489 |
| H O | 1.550094  | -2.381422 | -0.920783 |
| H O | 0.324720  | -1.571569 | 0.902867  |
| H O | -0.602691 | 0.726177  | -0.947074 |
| B O | -3.151757 | 0.217524  | -0.327399 |
| H O | -2.811470 | 1.101023  | -1.088395 |
| H O | -3.756490 | -0.694783 | -0.838894 |
| H O | -3.638358 | 0.596064  | 0.711853  |

#### P-4+CP

B3LYP/6-31G(d) Geometry

|     |           |           |           |
|-----|-----------|-----------|-----------|
| C O | 1.240064  | -0.357590 | 1.115892  |
| C O | 0.518008  | -1.348127 | 0.574137  |
| C O | 0.327165  | -1.019050 | -0.902322 |
| C O | -0.629349 | 0.214258  | -0.959854 |
| C O | 1.544314  | 0.650422  | 0.016707  |
| C O | 0.189201  | 1.363725  | -0.317642 |



C O 1.664958 -0.298581 -1.201449  
N O -1.958881 -0.057791 -0.278630  
O O -2.520989 0.870951 0.292126  
O O -2.414218 -1.192995 -0.395967  
H O 1.478430 -0.217267 2.165373  
H O 0.041907 -2.179050 1.081657  
H O 0.029087 -1.839316 -1.554301  
H O -0.925496 0.439608 -1.989220  
H O 2.372597 1.337408 0.202779  
H O -0.312832 1.773539 0.559534  
H O 0.335458 2.179050 -1.033406  
H O 1.681861 0.225603 -2.165373  
H O 2.520989 -0.976232 -1.137532

#### P-5+CP

B3LYP/6-31G(d) Geometry

C O -1.622833 -0.627793 -0.947425  
C O -0.887447 -1.426853 -0.162872  
C O -0.520608 -0.633111 1.084712  
C O 0.503205 0.488580 0.675864  
C O -1.746079 0.716470 -0.246251  
C O -0.322987 1.379501 -0.303686  
C O -1.786229 0.247661 1.228019  
C O 1.827299 0.003693 0.130122  
F O 1.726759 -0.636378 -1.055637  
F O 2.679053 1.041794 -0.057578  
F O 2.426675 -0.852656 0.993409  
H O -1.968373 -0.834275 -1.955470  
H O -0.511232 -2.416762 -0.396592  
H O -0.205630 -1.211138 1.955470  
H O 0.765539 1.057495 1.574653  
H O -2.552583 1.369909 -0.586731  
H O 0.085813 1.378389 -1.317372  
H O -0.353557 2.416762 0.044783  
H O -1.675385 1.062698 1.954337  
H O -2.679053 -0.338039 1.464821

#### P-6+CP

B3LYP/6-31G(d) Geometry

C O 1.222851 -0.333061 1.349003  
C O 2.047553 0.678416 1.039969  
C O 2.379323 0.562892 -0.441192  
C O 1.067254 0.940487 -1.215851  
C O 0.991786 -1.138658 0.077754  
C O 0.093218 -0.238226 -0.888043  
C O 2.371664 -0.974937 -0.600677  
B O -1.344981 0.039150 -0.285409  
C O -1.814162 1.492111 0.121868  
C O -2.342122 -1.174158 -0.090106  
H O 0.711583 -0.500259 2.292737  
H O 2.342131 1.505764 1.678687  
H O 3.271470 1.097234 -0.777957  
H O 1.266309 1.000236 -2.292737  
H O 0.687433 1.917135 -0.901087  
H O 0.614648 -2.155129 0.210292  
H O -0.057562 -0.845642 -1.795779  
H O 3.178654 -1.462807 -0.043780  
H O 2.386010 -1.309825 -1.645055  
H O -1.801222 2.156367 -0.755737  
H O -2.814519 1.543986 0.566751  
H O -1.099144 1.939077 0.828124  
H O -3.271470 -0.980418 -0.647827  
H O -1.963908 -2.156367 -0.395822

H O -2.656629 -1.241074 0.962443

#### P-7+CP

B3LYP/6-31G(d) Geometry

C O 0.809889 0.038432 1.426981  
C O 1.646790 0.985412 0.979172  
C O 1.995897 0.646558 -0.462743  
C O 0.700306 0.918254 -1.305720  
C O 0.589212 -0.948632 0.290690  
C O -0.282666 -0.197761 -0.824686  
C O 1.974628 -0.897404 -0.392618  
B O -1.706290 0.188884 -0.307008  
Cl O -2.895358 -1.095467 -0.003937  
Cl O -2.222467 1.846675 0.024696  
H O 0.283786 0.018649 2.376426  
H O 1.938564 1.898243 1.488995  
H O 2.895358 1.118132 -0.865764  
H O 0.907895 0.811555 -2.376426  
H O 0.317524 1.928546 -1.142090  
H O 0.191697 -1.928546 0.560791  
H O -0.434490 -0.930907 -1.629800  
H O 2.768053 -1.305093 0.241634  
H O 1.997038 -1.385326 -1.374600

#### P-8+CP

B3LYP/6-31G(d) Geometry

C O -1.953232 0.778376 0.206154  
C O -1.215549 1.066503 -0.875014  
C O -0.228695 -0.079881 -1.078300  
C O 0.839938 0.010324 0.089626  
C O -1.459409 -0.555179 0.750916  
C O -0.037408 -0.290691 1.355188  
C O -1.085307 -1.265516 -0.570082  
C O 1.517627 1.372960 0.166735  
O O 2.696460 1.599640 0.055914  
Cl O 2.118663 -1.264863 -0.154678  
H O -2.696460 1.409264 0.683251  
H O -1.233753 1.976444 -1.465848  
H O 0.234852 -0.162299 -2.061970  
H O -2.132071 -1.081409 1.431653  
H O -0.040045 0.545733 2.061970  
H O 0.354357 -1.166459 1.876912  
H O -0.518241 -2.190863 -0.434796  
H O -1.951376 -1.446729 -1.212857  
H O 0.787289 2.190863 0.346952

#### P-9+CP

B3LYP/6-31G(d) Geometry

C O 2.046705 -1.177067 0.323030  
C O 1.286750 -1.382480 -0.762028  
C O 0.579983 -0.070384 -1.082665  
C O -0.520573 0.196522 0.045241  
C O 1.856255 0.273414 0.742964  
C O 0.398620 0.393204 1.309472  
C O 1.678221 0.929601 -0.643642  
C O -1.419518 -1.015393 0.225646  
O O -2.621979 -1.017202 0.067786  
C O -1.384737 1.423197 -0.274781  
H O 2.615168 -1.916029 0.879069  
H O 1.113392 -2.322754 -1.275785  
H O 0.179661 0.029647 -2.094360  
H O 2.621979 0.690484 1.401617  
H O 0.209019 -0.347670 2.094360

H O 0.223811 1.382224 1.747204  
H O 1.349388 1.972932 -0.602138  
H O 2.575305 0.854623 -1.265739  
H O -0.892679 -1.945167 0.531697  
H O -1.963961 1.262414 -1.189254  
H O -0.775853 2.322754 -0.403011  
H O -2.101617 1.608994 0.531552

**P-10+CP**

B3LYP/6-31G(d) Geometry

C O -1.933929 -1.062798 -0.974983  
C O -1.193782 -1.930155 -0.269787  
C O -0.660993 -1.189913 0.950362  
C O 0.419006 -0.141928 0.463062  
C O -1.891344 0.271566 -0.246659  
C O -0.428482 0.830382 -0.439718  
C O -1.838476 -0.222127 1.217413  
C O 1.590826 -0.752866 -0.259441  
O O 2.750214 -0.621776 0.072761  
C O -0.261771 2.302682 -0.052102  
H O -2.390720 -1.224835 -1.946388  
H O -0.933831 -2.948116 -0.541858  
H O -0.318550 -1.808229 1.783251  
H O 0.817875 0.393663 1.331255  
H O -2.671849 0.990913 -0.508184  
H O -0.140425 0.719622 -1.492895  
H O -1.604341 0.562254 1.946388  
H O -2.750214 -0.745083 1.521879  
H O 1.324248 -1.351837 -1.160116  
H O 0.785383 2.615358 -0.137896  
H O -0.579108 2.487802 0.980792  
H O -0.858699 2.948116 -0.707395

**P-11+CP**

B3LYP/6-31G(d) Geometry

C O 0.492433 -1.830986 -0.933100  
C O 1.579215 -1.553959 -0.198562  
C O 1.135580 -0.682539 0.969022  
C O 0.757099 0.746530 0.396569  
C O -0.691047 -1.144821 -0.271953  
C O -0.474759 0.408697 -0.525250  
C O -0.284328 -1.245611 1.213785  
C O 1.899150 1.419531 -0.331419  
O O 2.526110 2.354596 0.112586  
C O -1.657279 1.197502 -0.179242  
N O -2.608501 1.799951 0.106594  
H O 0.451377 -2.354596 -1.882554  
H O 2.608501 -1.814477 -0.422404  
H O 1.813351 -0.625135 1.822496  
H O 0.463884 1.397247 1.224411  
H O -1.685619 -1.492636 -0.554569  
H O -0.246873 0.591076 -1.581838  
H O -0.895879 -0.629596 1.882554  
H O -0.266900 -2.278577 1.572436  
H O 2.155644 0.977521 -1.320873

**P-12+CP**

B3LYP/6-31G(d) Geometry

C O 2.799360 0.029358 0.805664  
C O 2.825675 0.874309 -0.488088  
C O 1.555932 0.205826 -1.068550  
C O 1.923116 -1.264243 -0.896581  
C O 2.667420 -1.367066 0.213407  
C O 1.392115 0.408627 1.377011

C O 0.512282 0.569374 0.078754  
C O -0.657912 -0.363270 0.100056  
O O -1.832232 -0.013645 0.023608  
Cl O -0.069857 2.276518 -0.131497  
H O 3.609934 0.180050 1.521496  
H O 3.704294 0.674008 -1.106908  
H O 2.722491 1.950502 -0.323058  
H O 1.209143 0.518717 -2.053694  
H O 1.559256 -2.067917 -1.528222  
H O 3.036835 -2.276518 0.675905  
H O 0.998530 -0.356247 2.053694  
H O 1.407785 1.356445 1.918977  
H O -0.427087 -1.432012 0.199653  
B O -3.071089 -1.074977 0.060594  
H O -3.622031 -0.874507 -0.994015  
H O -2.538897 -2.160701 0.171892  
H O -3.704294 -0.709043 1.020279

**P-13+CP**

B3LYP/6-31G(d) Geometry

C O 2.789003 -0.237924 0.813796  
C O 2.881112 0.506300 -0.535445  
C O 1.560479 -0.098148 -1.071577  
C O 1.823871 -1.574543 -0.804363  
C O 2.552849 -1.657226 0.317722  
C O 1.413742 0.291641 1.345642  
C O 0.534025 0.442829 0.038194  
C O -0.654410 -0.456055 0.131436  
O O -1.812791 -0.048462 0.000595  
C O 0.093575 1.888263 -0.234134  
H O 3.611088 -0.102601 1.520323  
H O 3.742161 0.195217 -1.133793  
H O 2.876774 1.596827 -0.443482  
H O 1.253722 0.167523 -2.085506  
H O 1.404587 -2.393112 -1.380643  
H O 2.848460 -2.557714 0.846447  
H O 0.975257 -0.386038 2.085506  
H O 1.517448 1.271375 1.823653  
H O -0.501556 -1.524395 0.331902  
H O 0.955740 2.557714 -0.290381  
H O -0.566020 2.250070 0.560787  
H O -0.459772 1.958911 -1.175706  
B O -3.112267 -1.012297 0.101264  
H O -3.637191 -0.873907 -0.978217  
H O -2.665284 -2.120712 0.317708  
H O -3.742161 -0.527359 1.011020

**P-14+CP**

B3LYP/6-31G(d) Geometry

C O -2.882568 0.116237 -0.291078  
C O -2.899808 -0.321514 1.190705  
C O -1.567170 -1.099424 1.078959  
C O -1.847661 -1.945655 -0.154868  
C O -2.636932 -1.224959 -0.964430  
C O -1.520189 0.905651 -0.370288  
C O -0.620996 0.101580 0.653949  
C O 0.663523 -0.330186 0.056822  
O O 1.753829 0.070289 0.479010  
C O -1.623341 2.392465 -0.019496  
H O -3.735723 0.692760 -0.656940  
H O -3.742301 -0.976291 1.430374  
H O -2.866029 0.508894 1.904984  
H O -1.213516 -1.627813 1.966530

H O -1.406342 -2.916519 -0.355231  
H O -2.963322 -1.484170 -1.966530  
H O -1.114039 0.820995 -1.385392  
H O -0.397334 0.719494 1.529082  
H O 0.656035 -1.021100 -0.797670  
H O -0.636017 2.868072 -0.025201  
H O -2.062010 2.546724 0.973059  
H O -2.250326 2.916519 -0.749865  
B O 3.170253 -0.379016 -0.161685  
H O 2.882062 -1.136853 -1.066376  
H O 3.658535 0.670248 -0.509414  
H O 3.742301 -0.890293 0.771848

#### P-15+CP

B3LYP/6-31G(d) Geometry

C O -2.838498 -0.459046 -0.335753  
C O -2.700364 -0.790698 1.165082  
C O -1.225652 -1.238352 1.037097  
C O -1.324212 -2.192073 -0.144743  
C O -2.284373 -1.729495 -0.958071  
C O -1.693734 0.629558 -0.499046  
C O -0.592167 0.126813 0.516732  
C O 0.745984 -0.061597 -0.104504  
O O 1.773379 0.361885 0.429074  
C O -2.155837 1.978944 -0.173141  
N O -2.549908 3.037481 0.096900  
H O -3.808113 -0.113561 -0.696272  
H O -3.353591 -1.611045 1.473712  
H O -2.848328 0.070840 1.825487  
H O -0.726267 -1.611291 1.932543  
H O -0.665849 -3.037481 -0.315150  
H O -2.566825 -2.113597 -1.932543  
H O -1.322379 0.640030 -1.529492  
H O -0.486104 0.817485 1.356607  
H O 0.834526 -0.617371 -1.048612  
B O 3.257116 0.113665 -0.186391  
H O 3.065352 -0.514640 -1.207222  
H O 3.677769 1.234502 -0.336436  
H O 3.808113 -0.496746 0.698251

#### P-16+CP

B3LYP/6-31G(d) Geometry

C O -1.329467 0.772841 -0.908892  
C O -2.029990 0.466070 0.191553  
C O -1.444666 -0.812579 0.771780  
C O -0.054052 -0.431975 1.378356  
C O -0.272054 -0.303444 -1.087309  
C O 0.800693 -0.071965 0.088395  
C O -1.008889 -1.536414 -0.523215  
C O 1.308725 1.307050 0.107158  
C O 1.935027 -0.995930 -0.072130  
N O 1.693107 2.402141 0.119580  
N O 2.801840 -1.755372 -0.212625  
H O -1.401704 1.668583 -1.515001  
H O -2.801840 1.063618 0.665371  
H O -2.078418 -1.367666 1.466483  
H O 0.401445 -1.276691 1.901884  
H O -0.103687 0.414150 2.066141  
H O 0.201637 -0.383840 -2.066141  
H O -1.853546 -1.828335 -1.152562  
H O -0.359326 -2.402141 -0.353157

#### P-17+CP

B3LYP/6-31G(d) Geometry

C O 0.650442 -0.670007 1.169546  
C O 0.650515 0.670118 1.169520  
C O 0.762831 1.128278 -0.275994  
C O -0.617696 0.794088 -0.973198  
C O 0.762706 -1.128237 -0.275950  
C O -0.617787 -0.793926 -0.973163  
C O 1.635035 -0.000039 -0.868767  
C O -1.761164 1.438376 -0.330745  
C O -1.761324 -1.438071 -0.330690  
N O -2.649416 -1.991459 0.172050  
N O -2.649223 1.991728 0.172094  
H O 0.481267 -1.330072 2.012728  
H O 0.481416 1.330235 2.012674  
H O 1.078303 2.159399 -0.443939  
H O -0.590285 1.139236 -2.012728  
H O 1.078062 -2.159399 -0.443854  
H O -0.590425 -1.139121 -2.012678  
H O 2.649416 -0.000088 -0.462029  
H O 1.678289 -0.000063 -1.964795

#### P-18+CP

B3LYP/6-31G(d) Geometry

C O 1.934870 -1.123066 -0.111543  
C O 1.038793 -1.540053 -1.016373  
C O -0.345557 -1.295156 -0.438928  
C O -0.544134 0.278079 -0.466388  
C O 1.162111 -0.595098 1.087843  
C O 0.483473 0.761061 0.641461  
C O -0.074938 -1.521096 1.065145  
C O -1.916556 0.671196 -0.146250  
C O 1.426581 1.767638 0.158940  
N O 2.186132 2.559549 -0.221034  
N O -3.010980 0.956755 0.117984  
H O 3.010980 -1.059309 -0.227737  
H O 1.232163 -1.887113 -2.025842  
H O -1.175854 -1.836833 -0.894172  
H O -0.288179 0.686864 -1.447391  
H O 1.711553 -0.500483 2.025842  
H O -0.062954 1.187744 1.488995  
H O 0.178500 -2.559549 1.292671  
H O -0.892367 -1.189300 1.715642

#### P-19+CP

B3LYP/6-31G(d) Geometry

C O -0.494871 -2.039954 -0.138619  
C O -1.346364 -1.452466 -0.990230  
C O -1.850664 -0.176363 -0.332174  
C O -0.637186 0.827679 -0.340377  
C O -0.429011 -1.170348 1.108918  
C O 0.330751 0.158564 0.713685  
C O -1.873393 -0.623413 1.148746  
C O -1.010153 2.268150 0.019863  
C O 1.689582 -0.060531 0.221949  
N O 2.769937 -0.236243 -0.167808  
H O 0.130195 -2.907573 -0.319093  
H O -1.558669 -1.745079 -2.013624  
H O -2.769937 0.250496 -0.741433  
H O -0.167258 0.826112 -1.328452  
H O -0.035244 -1.637849 2.013624  
H O 0.402391 0.799431 1.601536  
H O -2.611258 -1.406331 1.344739

H O -2.014602 0.197278 1.861792  
H O -1.508271 2.330018 0.994838  
H O -0.120566 2.907573 0.058630  
H O -1.689788 2.689774 -0.729649

#### P-20+CP

B3LYP/6-31G(d) Geometry

C O 0.928782 -1.482977 -0.799998  
C O 1.668126 -1.408481 0.314784  
C O 1.641805 0.038225 0.788559  
C O 0.199348 0.311896 1.329557  
C O 0.393137 -0.085947 -1.084635  
C O -0.698329 0.224030 0.033251  
C O 1.575713 0.768854 -0.572662  
C O -1.678392 -0.868965 0.123071  
C O -1.471137 1.531623 -0.245396  
N O -2.476558 -1.711071 0.184862  
H O 0.643992 -2.374668 -1.347335  
H O 2.117407 -2.231066 0.861805  
H O 2.433915 0.337184 1.479246  
H O 0.128320 1.316587 1.760991  
H O -0.102573 -0.404911 2.096655  
H O 0.027137 0.101225 -2.096655  
H O 2.476558 0.627001 -1.176190  
H O 1.359511 1.839872 -0.490434  
H O -2.046553 1.454381 -1.173728  
H O -2.169423 1.750506 0.568997  
H O -0.779802 2.374668 -0.335967

#### P-21+CP

B3LYP/6-31G(d) Geometry

C O 1.102823 -1.962715 -1.016111  
C O 1.999504 -1.195640 -0.380054  
C O 1.323748 -0.636505 0.865934  
C O 0.242057 0.429074 0.407494  
C O -0.190289 -1.911490 -0.213859  
C O -0.739029 -0.449561 -0.432724  
C O 0.383418 -1.812550 1.219137  
C O 0.836845 1.590394 -0.354132  
O O 0.942236 2.711843 0.089544  
C O -2.189756 -0.258607 -0.039146  
F O -2.581446 1.020152 -0.234942  
F O -2.433711 -0.554611 1.259796  
F O -2.999377 -1.047754 -0.782374  
H O 1.212885 -2.447924 -1.980534  
H O 2.999377 -0.937733 -0.713471  
H O 1.981662 -0.259393 1.651056  
H O -0.248859 0.836543 1.295888  
H O -0.924336 -2.692176 -0.419793  
H O -0.700354 -0.189365 -1.496365  
H O -0.362386 -1.569509 1.980534  
H O 0.934842 -2.711843 1.508290  
H O 1.207877 1.343374 -1.375187

#### P-22+CP

B3LYP/6-31G(d) Geometry

C O 0.881948 -2.038260 0.423290  
C O 1.829965 -1.378261 1.104012  
C O 2.337435 -0.255149 0.209746  
C O 1.171829 0.805646 0.137029  
C O 0.748862 -1.367982 -0.938132  
C O 0.077476 0.061784 -0.703329  
C O 2.215879 -0.940263 -1.171062

B O -1.409892 -0.063110 -0.174266  
C O -1.812685 0.355357 1.295786  
C O -2.523116 -0.630431 -1.145424  
C O 1.607301 2.141977 -0.475914  
H O 0.241315 -2.834870 0.790416  
H O 2.116610 -1.522189 2.141482  
H O 3.309607 0.169529 0.476098  
H O 0.814033 1.005053 1.153489  
H O 0.267120 -1.956766 -1.722176  
H O 0.026328 0.522085 -1.704518  
H O 2.894869 -1.792542 -1.279575  
H O 2.341956 -0.260650 -2.021800  
H O -1.607826 1.424192 1.460078  
H O -2.861864 0.171578 1.554159  
H O -1.179914 -0.171033 2.025391  
H O -3.309607 0.129454 -1.277238  
H O -2.178022 -0.930812 -2.141482  
H O -3.037000 -1.487669 -0.685517  
H O 2.017673 2.012117 -1.484837  
H O 2.376450 2.627781 0.137307  
H O 0.760169 2.834870 -0.554116

#### P-23+CP

B3LYP/6-31G(d) Geometry

C O 0.582936 -1.553825 1.148470  
C O 1.524104 -0.644597 1.438265  
C O 2.016139 -0.056893 0.123930  
C O 0.842504 0.847411 -0.417598  
C O 0.439429 -1.591247 -0.366152  
C O -0.240442 -0.213597 -0.818930  
C O 1.896860 -1.299135 -0.788014  
B O -1.705179 -0.071240 -0.293273  
C O 1.256809 1.754695 -1.581723  
Cl O -2.190326 1.026053 1.005830  
Cl O -2.983090 -1.080071 -1.004157  
H O -0.050016 -2.094082 1.845540  
H O 1.812043 -0.287619 2.422154  
H O 2.983090 0.452392 0.155192  
H O 0.478499 1.483262 0.395309  
H O -0.045781 -2.471752 -0.791802  
H O -0.308262 -0.264918 -1.915780  
H O 2.584244 -2.101174 -0.501479  
H O 2.009082 -1.084591 -1.857030  
H O 1.665260 1.180484 -2.422154  
H O 0.402321 2.329422 -1.958927  
H O 2.022980 2.471752 -1.263700

#### P-24+CP

B3LYP/6-31G(d) Geometry

C O -0.734301 1.534741 -0.978402  
C O -1.748806 1.241284 -0.153899  
C O -1.147090 0.676180 1.130112  
C O -0.548279 -0.715984 0.766065  
C O 0.562292 1.181962 -0.260454  
C O 0.582045 -0.389952 -0.228451  
C O 0.169100 1.490690 1.205191  
N O -1.564875 -1.680027 0.195094  
N O 1.941664 -0.876795 0.239566  
O O -1.154125 -2.554992 -0.560309  
O O -2.724613 -1.548509 0.571621  
O O 2.810539 -0.914448 -0.623280  
O O 2.107913 -1.148913 1.427575  
H O -0.791361 1.866332 -2.009471

|     |           |           |           |
|-----|-----------|-----------|-----------|
| H O | -2.810539 | 1.286244  | -0.364865 |
| H O | -1.789098 | 0.659074  | 2.009471  |
| H O | -0.144023 | -1.232008 | 1.640437  |
| H O | 1.481274  | 1.612813  | -0.659950 |
| H O | 0.455211  | -0.843292 | -1.208133 |
| H O | 0.884221  | 1.113780  | 1.943576  |
| H O | -0.013068 | 2.554992  | 1.373089  |

#### P-25+CP

B3LYP/6-31G(d) Geometry

|     |           |           |           |
|-----|-----------|-----------|-----------|
| C O | 1.340897  | 0.533424  | 1.123438  |
| C O | 0.014000  | 0.726239  | 1.163700  |
| C O | -0.469809 | 0.856821  | -0.270266 |
| C O | 1.759231  | 0.531100  | -0.336626 |
| C O | 0.751185  | 1.544155  | -0.918626 |
| C O | -0.347322 | -0.580346 | -0.953900 |
| C O | 1.213839  | -0.811681 | -0.985737 |
| C O | -1.263637 | -1.559225 | -0.270956 |
| C O | 1.958469  | -2.019513 | -0.395514 |
| O O | 2.975392  | -2.399288 | -0.933536 |
| O O | 1.552773  | -2.557218 | 0.763271  |
| O O | -1.078318 | -2.117472 | 0.800414  |
| O O | -2.420525 | -1.713167 | -0.943287 |
| H O | 1.998034  | 0.305504  | 1.955359  |
| H O | -0.630931 | 0.687546  | 2.034479  |
| H O | -1.451028 | 1.311262  | -0.422367 |
| H O | 2.818831  | 0.685386  | -0.545272 |
| H O | 0.904994  | 2.557218  | -0.536220 |
| H O | 0.721405  | 1.561715  | -2.014343 |
| H O | -0.700687 | -0.491518 | -1.983911 |
| H O | 1.518392  | -0.818985 | -2.034479 |
| H O | 0.643787  | -2.260021 | 1.001563  |
| H O | -2.975392 | -2.315901 | -0.411206 |

#### P-26+CP

B3LYP/6-31G(d) Geometry

|     |           |           |           |
|-----|-----------|-----------|-----------|
| C O | -1.995293 | -0.586454 | 0.294325  |
| C O | -1.043131 | -0.719229 | 1.227718  |
| C O | 0.268307  | -0.981063 | 0.508044  |
| C O | 0.676620  | 0.407834  | -0.189924 |
| C O | -1.333685 | -0.753198 | -1.064214 |
| C O | -0.461881 | 0.539333  | -1.316556 |
| C O | -0.220581 | -1.767772 | -0.724861 |
| C O | 1.998617  | 0.291869  | -0.825839 |
| C O | 0.712667  | 1.508545  | 0.781635  |
| C O | -1.229370 | 1.780813  | -1.282869 |
| N O | -1.872705 | 2.746833  | -1.287565 |
| N O | 3.030493  | 0.153252  | -1.338961 |
| N O | 0.755664  | 2.349558  | 1.579549  |
| H O | -3.030493 | -0.302267 | 0.444381  |
| H O | -1.135368 | -0.562988 | 2.296063  |
| H O | 1.089722  | -1.393115 | 1.094593  |
| H O | -1.987764 | -0.977537 | -1.908179 |
| H O | 0.021868  | 0.470819  | -2.296063 |
| H O | -0.620281 | -2.746833 | -0.450793 |
| H O | 0.535354  | -1.885931 | -1.508896 |

#### P-27+CP

B3LYP/6-31G(d) Geometry

|     |          |           |           |
|-----|----------|-----------|-----------|
| C O | 0.925892 | -0.287359 | 1.339852  |
| C O | 1.577704 | 0.644186  | 0.630638  |
| C O | 1.544336 | 0.213896  | -0.829218 |
| C O | 0.073013 | 0.386662  | -1.353914 |

|     |           |           |           |
|-----|-----------|-----------|-----------|
| C O | 0.443782  | -1.349976 | 0.360896  |
| C O | -0.724708 | -0.689289 | -0.494102 |
| C O | 1.603100  | -1.320888 | -0.661342 |
| C O | -1.726567 | -0.084539 | 0.396802  |
| N O | -2.543800 | 0.360622  | 1.092588  |
| C O | -1.458132 | -1.719322 | -1.381852 |
| C O | -0.461990 | 1.817927  | -1.326277 |
| H O | 0.670752  | -0.259663 | 2.393451  |
| H O | 1.974944  | 1.585897  | 0.994555  |
| H O | 2.287831  | 0.674104  | -1.485640 |
| H O | 0.050881  | 0.034920  | -2.393451 |
| H O | 0.162665  | -2.315139 | 0.788780  |
| H O | 2.543800  | -1.668035 | -0.224680 |
| H O | 1.407085  | -1.875121 | -1.586071 |
| H O | -1.977130 | -2.463832 | -0.769219 |
| H O | -2.201641 | -1.225838 | -2.016691 |
| H O | -0.748483 | -2.240351 | -2.031328 |
| H O | 0.159203  | 2.463832  | -1.958397 |
| H O | -1.488680 | 1.868703  | -1.705399 |
| H O | -0.464808 | 2.230371  | -0.312760 |

#### P-28+CP

B3LYP/6-31G(d) Geometry

|     |           |           |           |
|-----|-----------|-----------|-----------|
| C O | -0.877438 | -1.808499 | 0.010397  |
| C O | -1.663655 | -1.202593 | -0.888963 |
| C O | -1.687497 | 0.280553  | -0.551607 |
| C O | -0.269988 | 0.852052  | -0.930921 |
| C O | -0.369335 | -0.736339 | 0.964299  |
| C O | 0.672045  | 0.160677  | 0.161664  |
| C O | -1.590015 | 0.210840  | 0.988633  |
| C O | 1.688466  | -0.677452 | -0.491994 |
| N O | 2.512094  | -1.324354 | -0.995390 |
| C O | -0.230261 | 2.382541  | -0.975971 |
| C O | 1.416858  | 1.130662  | 1.106655  |
| H O | -0.549672 | -2.842216 | 0.015125  |
| H O | -2.114289 | -1.643884 | -1.772271 |
| H O | -2.512094 | 0.859994  | -0.975326 |
| H O | 0.012909  | 0.484461  | -1.921766 |
| H O | 0.026508  | -1.083081 | 1.921766  |
| H O | -2.465742 | -0.255533 | 1.448775  |
| H O | -1.403727 | 1.176904  | 1.469778  |
| H O | -0.557130 | 2.842216  | -0.037211 |
| H O | -0.898695 | 2.740649  | -1.767452 |
| H O | 0.773776  | 2.757244  | -1.202978 |
| H O | 2.013529  | 0.561881  | 1.827113  |
| H O | 2.097013  | 1.785653  | 0.554323  |
| H O | 0.716829  | 1.757057  | 1.665270  |

#### P-29+CP

B3LYP/6-31G(d) Geometry

|     |           |           |           |
|-----|-----------|-----------|-----------|
| C O | -1.922770 | -0.998576 | 0.058391  |
| C O | -1.012410 | -1.252904 | 1.008246  |
| C O | 0.362717  | -1.092911 | 0.380714  |
| C O | 0.583527  | 0.467609  | 0.138282  |
| C O | -1.166924 | -0.666319 | -1.219517 |
| C O | -0.497129 | 0.750204  | -1.009208 |
| C O | 0.074043  | -1.571770 | -1.059033 |
| C O | 1.930400  | 0.678445  | -0.414893 |
| C O | 0.436699  | 1.325720  | 1.408130  |
| C O | -1.458746 | 1.803942  | -0.693004 |
| N O | -2.235151 | 2.633917  | -0.454029 |
| N O | 2.999052  | 0.834182  | -0.843258 |
| H O | -2.999052 | -0.933922 | 0.173377  |



|     |           |           |           |
|-----|-----------|-----------|-----------|
| H O | -1.194689 | -1.444492 | 2.060015  |
| H O | 1.200521  | -1.551272 | 0.909511  |
| H O | -1.728612 | -0.730525 | -2.152986 |
| H O | 0.019359  | 1.043877  | -1.928960 |
| H O | -0.179404 | -2.633917 | -1.103629 |
| H O | 0.880670  | -1.355154 | -1.768012 |
| H O | 1.178702  | 1.020390  | 2.152986  |
| H O | 0.590552  | 2.385493  | 1.186282  |
| H O | -0.562209 | 1.207948  | 1.834163  |

### P-30+CP

B3LYP/6-31G(d) Geometry

|     |           |           |           |
|-----|-----------|-----------|-----------|
| C O | -0.706332 | 1.601786  | 0.844240  |
| C O | -0.690028 | 0.358392  | 1.342794  |
| C O | -0.717377 | -0.607716 | 0.166651  |
| C O | 0.710815  | -0.517803 | -0.531686 |
| C O | -0.757011 | 1.484576  | -0.671272 |
| C O | 0.652017  | 0.952720  | -1.149628 |
| C O | -1.586342 | 0.192561  | -0.828834 |
| C O | 1.777039  | -0.695510 | 0.464177  |
| C O | 1.756815  | 1.844789  | -0.806398 |
| N O | 2.613550  | 2.588425  | -0.559278 |
| N O | 2.609262  | -0.906063 | 1.245993  |
| C O | 0.908843  | -1.585174 | -1.629846 |
| H O | -0.591521 | 2.533046  | 1.387110  |
| H O | -0.555462 | 0.063390  | 2.377142  |
| H O | -1.006499 | -1.637850 | 0.384694  |
| H O | -1.080307 | 2.368857  | -1.223426 |
| H O | 0.642181  | 0.856347  | -2.241631 |
| H O | -2.613550 | 0.311397  | -0.475057 |
| H O | -1.598954 | -0.207776 | -1.848428 |
| H O | 0.112133  | -1.525556 | -2.377142 |
| H O | 1.868625  | -1.446277 | -2.137466 |
| H O | 0.898673  | -2.588425 | -1.193119 |

### P-31+CP

B3LYP/6-31G(d) Geometry

|     |           |           |           |
|-----|-----------|-----------|-----------|
| C O | 1.823439  | -0.828332 | 1.088242  |
| C O | 1.230527  | -1.905558 | 0.553824  |
| C O | 0.726110  | -1.507734 | -0.827717 |
| C O | -0.487333 | -0.513807 | -0.648087 |
| C O | 1.706327  | 0.305545  | 0.079876  |
| C O | 0.186047  | 0.758880  | 0.037294  |
| C O | 1.828791  | -0.502363 | -1.233393 |
| C O | -1.650362 | -1.112469 | 0.102130  |
| O O | -2.807260 | -1.026983 | -0.254865 |
| C O | -0.362982 | 1.098314  | 1.435036  |
| C O | -0.000096 | 1.999808  | -0.854778 |
| H O | 2.229430  | -0.732147 | 2.090087  |
| H O | 1.063734  | -2.868518 | 1.025662  |
| H O | 0.516630  | -2.327359 | -1.519578 |
| H O | -0.873671 | -0.227896 | -1.632336 |
| H O | 2.394050  | 1.144470  | 0.220126  |
| H O | 1.596459  | 0.065551  | -2.140340 |
| H O | 2.807260  | -0.979150 | -1.344933 |
| H O | -1.389615 | -1.664212 | 1.032618  |
| H O | -0.262497 | 0.268794  | 2.140340  |
| H O | -1.423439 | 1.372865  | 1.384798  |
| H O | 0.178391  | 1.956937  | 1.851666  |
| H O | -1.063509 | 2.249434  | -0.950345 |
| H O | 0.396132  | 1.853059  | -1.864628 |
| H O | 0.507263  | 2.868518  | -0.416844 |

### P-32+CP

B3LYP/6-31G(d) Geometry

|     |           |           |           |
|-----|-----------|-----------|-----------|
| C O | 0.606853  | 1.372778  | 1.038900  |
| C O | 1.745604  | 1.073977  | 0.397757  |
| C O | 1.382225  | 0.658324  | -1.020251 |
| C O | 0.687947  | -0.761889 | -0.944829 |
| C O | -0.533034 | 1.165502  | 0.058163  |
| C O | -0.655340 | -0.426416 | -0.152960 |
| C O | 0.147343  | 1.552754  | -1.269907 |
| C O | 1.596685  | -1.817026 | -0.337287 |
| O O | 2.198101  | -2.615541 | -1.018883 |
| C O | -0.795336 | -1.125039 | 1.134767  |
| C O | -1.827053 | -0.740865 | -0.985463 |
| N O | -2.745055 | -0.946486 | -1.665516 |
| N O | -0.905097 | -1.654062 | 2.162008  |
| H O | 0.479060  | 1.616866  | 2.087129  |
| H O | 2.745055  | 1.037642  | 0.817823  |
| H O | 2.183930  | 0.681761  | -1.760096 |
| H O | 0.438089  | -1.097743 | -1.953906 |
| H O | -1.493982 | 1.618336  | 0.303412  |
| H O | -0.427968 | 1.283165  | -2.162008 |
| H O | 0.401326  | 2.615541  | -1.301232 |
| H O | 1.721983  | -1.788120 | 0.763616  |

### P-33+CP

B3LYP/6-31G(d) Geometry

|     |           |           |           |
|-----|-----------|-----------|-----------|
| C O | 1.900054  | -0.669909 | -0.547713 |
| C O | 1.900054  | 0.669908  | -0.547714 |
| C O | 0.469744  | 1.127616  | -0.767725 |
| C O | -0.321713 | 0.817412  | 0.593947  |
| C O | 0.469744  | -1.127617 | -0.767725 |
| C O | -0.321713 | -0.817412 | 0.593948  |
| C O | -0.075363 | 0.000000  | -1.665960 |
| C O | -1.679723 | 1.375490  | 0.522245  |
| C O | 0.356684  | 1.398314  | 1.759103  |
| C O | 0.356684  | -1.398313 | 1.759103  |
| N O | 0.906018  | -1.896181 | 2.651382  |
| C O | -1.679723 | -1.375490 | 0.522246  |
| N O | -2.729299 | 1.859981  | 0.422433  |
| N O | 0.906019  | 1.896182  | 2.651381  |
| N O | -2.729299 | -1.859981 | 0.422434  |
| H O | 2.729299  | -1.332240 | -0.328765 |
| H O | 2.729299  | 1.332239  | -0.328765 |
| H O | 0.316271  | 2.159774  | -1.083179 |
| H O | 0.316270  | -2.159774 | -1.083179 |
| H O | 0.395712  | -0.000001 | -2.651382 |
| H O | -1.164107 | 0.000000  | -1.780192 |

### P-34+CP

B3LYP/6-31G(d) Geometry

|     |           |           |           |
|-----|-----------|-----------|-----------|
| C O | 2.050716  | -0.620578 | -0.752064 |
| C O | 1.196652  | -0.720307 | -1.779150 |
| C O | -0.193281 | -0.905215 | -1.197564 |
| C O | -0.615583 | 0.507432  | -0.560532 |
| C O | 1.239947  | -0.720062 | 0.531451  |
| C O | 0.429966  | 0.640007  | 0.680525  |
| C O | 0.125666  | -1.691912 | 0.087969  |
| C O | -2.009062 | 0.439168  | -0.093994 |
| C O | -0.524455 | 1.587437  | -1.551920 |
| C O | 1.326019  | 1.792688  | 0.520045  |
| N O | 2.060662  | 2.689839  | 0.463534  |
| C O | -0.253090 | 0.768422  | 2.059176  |
| N O | -3.109460 | 0.340875  | 0.262133  |

|     |           |           |           |
|-----|-----------|-----------|-----------|
| N O | -0.471594 | 2.410555  | -2.368000 |
| H O | 3.109460  | -0.392469 | -0.794826 |
| H O | 1.408255  | -0.590772 | -2.833997 |
| H O | -0.966797 | -1.290990 | -1.862291 |
| H O | 1.791953  | -0.959937 | 1.442094  |
| H O | 0.512690  | -2.689839 | -0.130979 |
| H O | -0.716397 | -1.774869 | 0.781689  |
| H O | -0.896755 | -0.089222 | 2.266748  |
| H O | 0.517281  | 0.823194  | 2.833997  |
| H O | -0.860963 | 1.675232  | 2.117897  |

#### P-35+CP

B3LYP/6-31G(d) Geometry

|     |           |           |           |
|-----|-----------|-----------|-----------|
| C O | 0.201729  | 2.051660  | 0.495092  |
| C O | 1.398359  | 1.790043  | -0.048531 |
| C O | 1.176732  | 0.854754  | -1.229479 |
| C O | 0.791059  | -0.587298 | -0.667381 |
| C O | -0.836462 | 1.306626  | -0.323880 |
| C O | -0.646686 | -0.259258 | -0.000220 |
| C O | -0.197635 | 1.363372  | -1.723267 |
| C O | 1.828468  | -1.022642 | 0.376550  |
| O O | 2.614667  | -1.922972 | 0.192403  |
| C O | -0.714440 | -0.507796 | 1.449343  |
| C O | -1.735717 | -1.022377 | -0.629783 |
| N O | -2.614667 | -1.582196 | -1.141118 |
| C O | 0.736096  | -1.638145 | -1.782143 |
| N O | -0.776598 | -0.679547 | 2.595782  |
| H O | -0.010673 | 2.604965  | 1.402502  |
| H O | 2.369031  | 2.101693  | 0.322435  |
| H O | 1.985351  | 0.795826  | -1.960638 |
| H O | -1.875791 | 1.617587  | -0.213640 |
| H O | -0.684057 | 0.722478  | -2.463811 |
| H O | -0.146588 | 2.386601  | -2.104648 |
| H O | 1.853600  | -0.430627 | 1.311011  |
| H O | 1.742188  | -1.781277 | -2.183427 |
| H O | 0.069925  | -1.344223 | -2.595782 |
| H O | 0.398826  | -2.604965 | -1.398228 |

#### P-36+CP

B3LYP/6-31G(d) Geometry

|     |           |           |           |
|-----|-----------|-----------|-----------|
| C O | -2.054393 | -0.922399 | -0.915872 |
| C O | -1.346643 | -1.923781 | -0.374785 |
| C O | -0.639097 | -1.368609 | 0.855223  |
| C O | 0.517997  | -0.378322 | 0.389203  |
| C O | -1.823496 | 0.311815  | -0.057435 |
| C O | -0.338183 | 0.819364  | -0.290386 |
| C O | -1.709408 | -0.357457 | 1.329837  |
| C O | 1.424904  | -1.060621 | -0.627355 |
| O O | 2.636495  | -0.991326 | -0.625001 |
| C O | -0.031708 | 1.035418  | -1.785833 |
| C O | -0.134039 | 2.179612  | 0.405425  |
| C O | 1.392866  | 0.042186  | 1.582001  |
| H O | -2.621638 | -0.943296 | -1.840803 |
| H O | -1.226996 | -2.930258 | -0.762826 |
| H O | -0.292325 | -2.107902 | 1.582430  |
| H O | -2.559876 | 1.113254  | -0.167726 |
| H O | -1.376873 | 0.310524  | 2.129448  |
| H O | -2.636495 | -0.850410 | 1.637335  |
| H O | 0.907724  | -1.661863 | -1.403987 |
| H O | -0.216430 | 0.143476  | -2.390179 |
| H O | 1.012452  | 1.334362  | -1.936075 |
| H O | -0.663691 | 1.839321  | -2.183469 |
| H O | 0.901383  | 2.525392  | 0.314533  |

|     |           |           |           |
|-----|-----------|-----------|-----------|
| H O | -0.390025 | 2.167542  | 1.467990  |
| H O | -0.771220 | 2.930258  | -0.077759 |
| H O | 1.912229  | -0.833957 | 1.983717  |
| H O | 0.807173  | 0.485625  | 2.390179  |
| H O | 2.163981  | 0.754831  | 1.279409  |

#### P-37+CP

B3LYP/6-31G(d) Geometry

|     |           |           |           |
|-----|-----------|-----------|-----------|
| C O | -2.760129 | 0.617017  | 0.124895  |
| C O | -2.545914 | 1.028158  | -1.343009 |
| C O | -1.013050 | 1.155051  | -1.194278 |
| C O | -0.932796 | 2.019703  | 0.056153  |
| C O | -1.965761 | 1.691996  | 0.844401  |
| C O | -1.872013 | -0.723807 | 0.167327  |
| C O | -0.622790 | -0.350561 | -0.794790 |
| C O | 0.682102  | -0.311885 | -0.039476 |
| O O | 1.731475  | -0.679044 | -0.568178 |
| C O | -1.492872 | -1.061679 | 1.548227  |
| C O | -2.656447 | -1.848081 | -0.366713 |
| C O | -0.490305 | -1.251402 | -2.030749 |
| N O | -3.314237 | -2.704752 | -0.791383 |
| N O | -1.202739 | -1.303522 | 2.645814  |
| H O | -3.778075 | 0.433700  | 0.469597  |
| H O | -3.013316 | 1.989987  | -1.568424 |
| H O | -2.877649 | 0.283172  | -2.071365 |
| H O | -0.442583 | 1.492764  | -2.061167 |
| H O | -0.122894 | 2.704752  | 0.283710  |
| H O | -2.173209 | 2.042439  | 1.848710  |
| H O | 0.723722  | 0.102260  | 0.974282  |
| H O | 0.342051  | -0.901600 | -2.645814 |
| H O | -1.398909 | -1.244242 | -2.635181 |
| H O | -0.280545 | -2.286635 | -1.747065 |
| B O | 3.194407  | -0.529708 | 0.138593  |
| H O | 2.962992  | -0.031767 | 1.218768  |
| H O | 3.597750  | -1.665927 | 0.156924  |
| H O | 3.778075  | 0.180517  | -0.645485 |

#### P-38+CP

B3LYP/6-31G(d) Geometry

|     |           |           |           |
|-----|-----------|-----------|-----------|
| C O | -2.029454 | -1.062782 | -0.308705 |
| C O | -1.232869 | -1.658323 | 0.588579  |
| C O | 0.201885  | -1.457966 | 0.128209  |
| C O | 0.563989  | 0.077999  | 0.354963  |
| C O | -1.135249 | -0.451610 | -1.378102 |
| C O | -0.401813 | 0.800113  | -0.724862 |
| C O | 0.011868  | -1.486109 | -1.402636 |
| C O | 0.380860  | 0.542455  | 1.813185  |
| C O | -1.379321 | 1.679742  | -0.068276 |
| N O | -2.156400 | 2.397790  | 0.411227  |
| C O | 1.977360  | 0.273778  | -0.001311 |
| C O | 0.334774  | 1.649906  | -1.785345 |
| N O | 3.104480  | 0.401222  | -0.252804 |
| H O | -3.104480 | -0.931659 | -0.255321 |
| H O | -1.525359 | -2.122062 | 1.524275  |
| H O | 0.951900  | -2.124962 | 0.557876  |
| H O | -1.613697 | -0.197855 | -2.326335 |
| H O | -0.322181 | -2.461696 | -1.765025 |
| H O | 0.896902  | -1.174155 | -1.965717 |
| H O | 1.043785  | -0.028817 | 2.471219  |
| H O | 0.622103  | 1.603591  | 1.923618  |
| H O | -0.652206 | 0.391842  | 2.133098  |
| H O | 1.032676  | 1.040243  | -2.363591 |
| H O | -0.394721 | 2.091625  | -2.471219 |



H O 0.901094 2.461696 -1.320159

### P-39+CP

B3LYP/6-31G(d) Geometry

C O 0.696457 0.669637 -1.646346  
C O 0.696457 -0.669637 -1.646346  
C O 0.713713 -1.125336 -0.195082  
C O -0.720295 -0.810190 0.419717  
C O 0.713713 1.125336 -0.195082  
C O -0.720295 0.810190 0.419717  
C O 1.557805 0.000000 0.438898  
C O -1.771142 -1.381459 -0.435446  
C O -1.771142 1.381459 -0.435445  
N O -2.587061 1.903996 -1.075614  
N O -2.587063 -1.903995 -1.075614  
C O -0.888458 -1.452823 1.815531  
C O -0.888458 1.452822 1.815531  
H O 0.583491 1.330776 -2.497912  
H O 0.583491 -1.330776 -2.497912  
H O 1.019310 -2.157488 -0.010564  
H O 1.019310 2.157487 -0.010564  
H O 2.587063 0.000000 0.071028  
H O 1.570808 0.000000 1.533099  
H O -0.091078 -1.149798 2.497912  
H O -1.850052 -1.190194 2.264835  
H O -0.853777 -2.541930 1.716076  
H O -0.091078 1.149798 2.497912  
H O -0.853776 2.541930 1.716076  
H O -1.850052 1.190194 2.264835

### P-40+CP

B3LYP/6-31G(d) Geometry

C O 0.760557 -1.954255 -0.028350  
C O 1.579480 -1.253441 0.766919  
C O 1.741313 0.129961 0.153052  
C O 0.381383 0.921954 0.348509  
C O 0.371811 -1.047591 -1.187022  
C O -0.603603 0.074537 -0.615163  
C O 1.676826 -0.238519 -1.346155  
C O -0.069205 0.943839 1.819110  
C O -1.708296 -0.556104 0.123650  
N O -2.609122 -1.052545 0.664499  
C O 0.556233 2.385835 -0.099457  
C O -1.256968 0.873477 -1.768799  
H O 0.346806 -2.940880 0.148803  
H O 1.979928 -1.558539 1.728043  
H O 2.609122 0.704306 0.489771  
H O -0.034669 -1.540262 -2.073647  
H O 2.513676 -0.867202 -1.663119  
H O 1.598753 0.617995 -2.022563  
H O 0.688260 1.449231 2.430986  
H O -1.010419 1.492881 1.935807  
H O -0.220604 -0.059291 2.223317  
H O 0.936663 2.489471 -1.119022  
H O -0.386073 2.940880 -0.033825  
H O 1.270659 2.881456 0.568098  
H O -0.503429 1.306310 -2.430986  
H O -1.890338 0.208447 -2.364667  
H O -1.887832 1.683042 -1.390454

### P-41+CP

B3LYP/6-31G(d) Geometry

C O 0.996859 0.021249 1.222297

C O 0.638743 -1.183595 0.755667  
C O 0.622589 -1.105218 -0.765663  
C O -0.583084 -0.187337 -1.191363  
C O 1.220334 0.936878 0.024657  
C O -0.168037 1.227016 -0.648772  
C O 1.780923 -0.094567 -0.991690  
C O -1.463201 1.299857 0.214449  
C O -1.830452 -0.109756 -0.290452  
O O -2.755781 -0.852670 -0.084583  
H O 1.031293 0.336543 2.260280  
H O 0.315712 -2.044393 1.331866  
H O 0.671616 -2.056758 -1.298430  
H O -0.805280 -0.277638 -2.260280  
H O 1.823259 1.829166 0.210138  
H O -0.079768 2.016802 -1.399111  
H O 1.832802 0.287604 -2.018769  
H O 2.755781 -0.497802 -0.698831  
H O -2.186754 2.056758 -0.111138  
H O -1.338904 1.383760 1.299201

### P-42+CP

B3LYP/6-31G(d) Geometry

C O 1.392449 -1.525153 -0.208172  
C O 0.866440 -0.950931 -1.299217  
C O 0.465555 0.470751 -0.926051  
C O -0.773335 0.402825 0.052192  
C O 1.345384 -0.502432 0.922188  
C O -0.152813 -0.279627 1.333063  
C O 1.579895 0.795763 0.106972  
C O -1.515410 1.731057 0.184937  
C O -1.164234 -1.458775 1.227759  
C O -1.707192 -0.823719 -0.064939  
O O -2.574672 -1.127306 -0.844613  
H O 1.709625 -2.557405 -0.099574  
H O 0.660632 -1.418326 -2.256526  
H O 0.330316 1.166334 -1.757843  
H O 2.017345 -0.689246 1.763702  
H O -0.224929 0.302005 2.256526  
H O 1.396101 1.711944 0.680928  
H O 2.574672 0.843322 -0.347687  
H O -2.058260 1.953692 -0.740833  
H O -0.822855 2.557405 0.383408  
H O -2.247943 1.705143 1.000421  
H O -1.919473 -1.485631 2.022333  
H O -0.749228 -2.464987 1.109929

### P-43+CP

B3LYP/6-31G(d) Geometry

C O 1.000821 -1.114663 1.088461  
C O 0.581408 -1.961452 0.137774  
C O 0.603286 -1.212136 -1.189458  
C O -0.533168 -0.122618 -1.159981  
C O 1.300263 0.222524 0.421324  
C O -0.057269 0.884109 -0.040977  
C O 1.826008 -0.287949 -0.948421  
C O -1.351578 0.579011 0.787397  
C O -1.789887 -0.394304 -0.319546  
O O -2.764899 -1.084121 -0.481731  
C O 0.107589 2.351107 -0.428750  
H O 1.036439 -1.296646 2.157895  
H O 0.198327 -2.967624 0.272005  
H O 0.605260 -1.829264 -2.090107  
H O -0.728345 0.286959 -2.157895

|     |           |           |           |
|-----|-----------|-----------|-----------|
| H O | 1.950274  | 0.900766  | 0.981142  |
| H O | 1.935578  | 0.498987  | -1.703806 |
| H O | 2.764899  | -0.844311 | -0.863258 |
| H O | -2.034098 | 1.431667  | 0.890682  |
| H O | -1.219503 | 0.120018  | 1.772315  |
| H O | -0.799429 | 2.741226  | -0.906670 |
| H O | 0.939037  | 2.499013  | -1.127524 |
| H O | 0.305028  | 2.967624  | 0.457415  |

#### P-44+CP

B3LYP/6-31G(d) Geometry

|     |           |           |           |
|-----|-----------|-----------|-----------|
| C O | -1.212258 | -0.983378 | 1.097093  |
| C O | -2.039531 | -0.786366 | 0.060714  |
| C O | -1.184851 | -0.630257 | -1.191227 |
| C O | -0.427903 | 0.744000  | -1.086779 |
| C O | 0.212489  | -0.968674 | 0.563585  |
| C O | 0.564025  | 0.518234  | 0.130370  |
| C O | -0.014945 | -1.588472 | -0.839808 |
| C O | -0.083878 | 1.726755  | 0.892530  |
| C O | -1.068031 | 1.887672  | -0.279467 |
| O O | -1.985193 | 2.635033  | -0.492452 |
| C O | 1.981783  | 0.668813  | -0.156365 |
| N O | 3.116499  | 0.780430  | -0.383814 |
| H O | -1.478776 | -1.058467 | 2.145994  |
| H O | -3.116499 | -0.660397 | 0.091939  |
| H O | -1.691297 | -0.780279 | -2.145994 |
| H O | 0.019616  | 1.048973  | -2.037448 |
| H O | 0.974768  | -1.424214 | 1.197733  |
| H O | 0.849869  | -1.493394 | -1.506301 |
| H O | -0.329717 | -2.635033 | -0.790971 |
| H O | 0.579162  | 2.590562  | 1.008161  |
| H O | -0.539718 | 1.495774  | 1.859711  |

#### P-45+CP

B3LYP/6-31G(d) Geometry

|      |           |           |           |
|------|-----------|-----------|-----------|
| C O  | -1.048426 | 0.352707  | -1.263626 |
| C O  | -1.741542 | 0.598212  | -0.143329 |
| C O  | -1.217611 | -0.339326 | 0.941264  |
| C O  | 0.236581  | 0.109890  | 1.320763  |
| C O  | -0.061395 | -0.770519 | -0.962685 |
| C O  | 1.029709  | -0.185798 | -0.001999 |
| C O  | -0.885360 | -1.583808 | 0.073545  |
| C O  | 0.640834  | 1.612209  | 1.246410  |
| C O  | 1.396195  | 1.323161  | -0.063223 |
| Cl O | 2.480283  | -1.263277 | 0.118247  |
| O O  | 2.047293  | 1.983284  | -0.824715 |
| H O  | -1.094153 | 0.892395  | -2.203400 |
| H O  | -2.480283 | 1.377826  | 0.011855  |
| H O  | -1.873013 | -0.493716 | 1.801476  |
| H O  | 0.603333  | -0.416436 | 2.203400  |
| H O  | 0.354352  | -1.297554 | -1.821670 |
| H O  | -1.773325 | -2.045700 | -0.368438 |
| H O  | -0.294516 | -2.342152 | 0.598766  |
| H O  | 1.319488  | 1.937784  | 2.043000  |
| H O  | -0.168968 | 2.342152  | 1.153118  |

#### P-46+CP

B3LYP/6-31G(d) Geometry

|     |           |           |           |
|-----|-----------|-----------|-----------|
| C O | 1.458399  | -1.350551 | -0.998680 |
| C O | 2.145530  | -0.771832 | -0.003916 |
| C O | 1.159981  | -0.442992 | 1.109939  |
| C O | 0.235121  | 0.741420  | 0.626770  |
| C O | -0.000933 | -1.421251 | -0.571747 |

|     |           |           |           |
|-----|-----------|-----------|-----------|
| C O | -0.588877 | 0.053182  | -0.563141 |
| C O | 0.172570  | -1.630267 | 0.953478  |
| C O | -0.023738 | 1.105880  | -1.576009 |
| C O | 0.823808  | 1.692938  | -0.436868 |
| O O | 1.620044  | 2.592871  | -0.375244 |
| C O | -2.036187 | 0.048496  | -0.433307 |
| C O | -0.504779 | 1.445099  | 1.760069  |
| N O | -3.193664 | 0.043111  | -0.321780 |
| H O | 1.832978  | -1.644924 | -1.973356 |
| H O | 3.193664  | -0.492094 | -0.002591 |
| H O | 1.589050  | -0.272340 | 2.099640  |
| H O | -0.630747 | -2.132174 | -1.109479 |
| H O | -0.757802 | -1.514223 | 1.520438  |
| H O | 0.631629  | -2.592871 | 1.197398  |
| H O | -0.772759 | 1.814539  | -1.945371 |
| H O | 0.535894  | 0.706282  | -2.426477 |
| H O | 0.207228  | 2.035633  | 2.346858  |
| H O | -0.991233 | 0.724646  | 2.426477  |
| H O | -1.277227 | 2.123760  | 1.383445  |

#### P-47+CP

B3LYP/6-31G(d) Geometry

|     |           |           |           |
|-----|-----------|-----------|-----------|
| C O | -0.872794 | -1.781244 | 0.111833  |
| C O | -1.407621 | -1.099866 | -0.910864 |
| C O | -1.339946 | 0.382699  | -0.564541 |
| C O | 0.166129  | 0.858941  | -0.600353 |
| C O | -0.447198 | -0.768108 | 1.166520  |
| C O | 0.793757  | 0.048146  | 0.621583  |
| C O | -1.556191 | 0.298081  | 0.968878  |
| C O | 0.284835  | 2.379800  | -0.616505 |
| C O | 1.130187  | 0.123357  | -1.588663 |
| C O | 1.688272  | -0.675967 | -0.403081 |
| C O | 1.564277  | 0.762504  | 1.728768  |
| O O | 2.549892  | -1.512988 | -0.293546 |
| H O | -0.677253 | -2.847140 | 0.165269  |
| H O | -1.744776 | -1.501291 | -1.861260 |
| H O | -2.015259 | 1.034315  | -1.126538 |
| H O | -0.297582 | -1.159817 | 2.175677  |
| H O | -2.549892 | -0.072461 | 1.240124  |
| H O | -1.364270 | 1.239082  | 1.497266  |
| H O | -0.298185 | 2.847140  | 0.185335  |
| H O | -0.083222 | 2.780364  | -1.569575 |
| H O | 1.324874  | 2.708213  | -0.504867 |
| H O | 1.891224  | 0.773659  | -2.038621 |
| H O | 0.678528  | -0.478605 | -2.383476 |
| H O | 2.094651  | 0.025307  | 2.342242  |
| H O | 0.895117  | 1.332975  | 2.383476  |
| H O | 2.313053  | 1.455101  | 1.328073  |

#### P-48+CP

B3LYP/6-31G(d) Geometry

|     |           |           |           |
|-----|-----------|-----------|-----------|
| C O | 1.275300  | 0.292565  | 1.173583  |
| C O | 0.851184  | -0.978824 | 1.119179  |
| C O | 0.818159  | -1.387317 | -0.347269 |
| C O | -0.353344 | -0.578591 | -1.039194 |
| C O | 1.537401  | 0.752246  | -0.254333 |
| C O | 0.153749  | 0.892381  | -0.992479 |
| C O | 2.028861  | -0.579291 | -0.876590 |
| C O | -0.954970 | 1.737935  | -0.301074 |
| C O | -1.680246 | -0.611091 | -0.282707 |
| O O | -2.420069 | -1.569991 | -0.211948 |
| C O | -1.923688 | 0.749053  | 0.377809  |
| H O | 1.339076  | 0.925405  | 2.053311  |

|     |           |           |           |
|-----|-----------|-----------|-----------|
| H O | 0.490566  | -1.590977 | 1.939681  |
| H O | 0.786887  | -2.458973 | -0.550903 |
| H O | -0.508954 | -0.962500 | -2.053311 |
| H O | 2.184568  | 1.626301  | -0.365101 |
| H O | 0.347691  | 1.277201  | -1.999200 |
| H O | 2.096436  | -0.554499 | -1.971136 |
| H O | 2.979869  | -0.921581 | -0.455880 |
| H O | -1.491774 | 2.321124  | -1.057858 |
| H O | -0.532919 | 2.458973  | 0.407392  |
| H O | -1.704195 | 0.631726  | 1.446604  |
| H O | -2.979869 | 1.025970  | 0.298354  |

#### P-49+CP

B3LYP/6-31G(d) Geometry

|     |           |           |           |
|-----|-----------|-----------|-----------|
| C O | -1.392696 | -1.113964 | 0.646846  |
| C O | -0.868724 | -0.131165 | 1.393580  |
| C O | -0.643849 | 1.066513  | 0.479081  |
| C O | 0.541612  | 0.698549  | -0.514021 |
| C O | -1.535844 | -0.583829 | -0.774561 |
| C O | -0.100674 | -0.420759 | -1.397086 |
| C O | -1.855690 | 0.900331  | -0.471544 |
| C O | 0.844365  | -1.653593 | -1.350556 |
| C O | 1.714961  | 0.022469  | 0.215855  |
| O O | 2.484050  | 0.597474  | 0.958157  |
| C O | 1.775499  | -1.464661 | -0.137375 |
| C O | 1.057598  | 1.931635  | -1.268408 |
| H O | -1.603994 | -2.132793 | 0.956453  |
| H O | -0.555055 | -0.183658 | 2.431203  |
| H O | -0.506702 | 2.031195  | 0.972294  |
| H O | -2.233567 | -1.125734 | -1.418867 |
| H O | -0.222083 | -0.078749 | -2.431203 |
| H O | -1.822738 | 1.547026  | -1.355993 |
| H O | -2.812785 | 1.034842  | 0.042555  |
| H O | 1.438749  | -1.691468 | -2.270638 |
| H O | 0.283413  | -2.593392 | -1.302648 |
| H O | 1.427732  | -2.022828 | 0.740298  |
| H O | 2.812785  | -1.767680 | -0.314739 |
| H O | 1.589587  | 2.593392  | -0.577100 |
| H O | 0.236344  | 2.491706  | -1.728533 |
| H O | 1.756459  | 1.649231  | -2.065199 |

#### P-50+CP

B3LYP/6-31G(d) Geometry

|     |           |           |           |
|-----|-----------|-----------|-----------|
| C O | 1.161812  | -1.043286 | 1.160666  |
| C O | 0.534651  | -1.964531 | 0.415214  |
| C O | 0.602671  | -1.500677 | -1.034059 |
| C O | -0.321130 | -0.222306 | -1.183178 |
| C O | 1.652774  | 0.051284  | 0.221778  |
| C O | 0.394475  | 0.857483  | -0.307210 |
| C O | 1.986883  | -0.810545 | -1.023262 |
| C O | -0.636330 | 1.275034  | 0.797725  |
| C O | -1.726051 | -0.406244 | -0.619873 |
| O O | -2.621301 | -1.020718 | -1.161544 |
| C O | 0.840573  | 2.096278  | -1.098963 |
| C O | -1.824965 | 0.296799  | 0.735111  |
| H O | 1.237721  | -1.016055 | 2.243136  |
| H O | -0.010456 | -2.836889 | 0.761432  |
| H O | 0.412285  | -2.260352 | -1.794343 |
| H O | -0.387956 | 0.047248  | -2.243136 |
| H O | 2.445003  | 0.695653  | 0.613617  |
| H O | 2.198179  | -0.232587 | -1.929392 |
| H O | 2.805416  | -1.514204 | -0.841860 |
| H O | -0.987963 | 2.293158  | 0.594656  |

|     |           |           |           |
|-----|-----------|-----------|-----------|
| H O | -0.171658 | 1.300132  | 1.789121  |
| H O | -0.014916 | 2.577440  | -1.588769 |
| H O | 1.573412  | 1.854550  | -1.876102 |
| H O | 1.297144  | 2.836889  | -0.430015 |
| H O | -1.756679 | -0.478641 | 1.508423  |
| H O | -2.805416 | 0.771438  | 0.844461  |

#### P-51+CP

B3LYP/6-31G(d) Geometry

|     |           |           |           |
|-----|-----------|-----------|-----------|
| C O | 0.193753  | 1.443100  | 1.067257  |
| C O | 1.081780  | 1.684838  | 0.091839  |
| C O | 0.472648  | 1.193622  | -1.214294 |
| C O | 0.435694  | -0.385971 | -1.153874 |
| C O | -1.025763 | 0.797837  | 0.426921  |
| C O | -0.611587 | -0.675614 | -0.021041 |
| C O | -1.020500 | 1.503886  | -0.950239 |
| C O | 0.113382  | -1.556515 | 1.060159  |
| C O | 1.747978  | -1.029001 | -0.708630 |
| O O | 2.746078  | -1.094386 | -1.391762 |
| C O | -1.797486 | -1.368083 | -0.530395 |
| N O | -2.746078 | -1.912286 | -0.924230 |
| C O | 1.615996  | -1.546983 | 0.724539  |
| H O | 0.327055  | 1.596078  | 2.133079  |
| H O | 2.090984  | 2.069302  | 0.197521  |
| H O | 0.922273  | 1.572461  | -2.133079 |
| H O | 0.143051  | -0.787122 | -2.128524 |
| H O | -1.950489 | 0.820528  | 1.006573  |
| H O | -1.704512 | 1.055326  | -1.678979 |
| H O | -1.217533 | 2.576891  | -0.870052 |
| H O | -0.277418 | -2.576891 | 1.018163  |
| H O | -0.096232 | -1.177332 | 2.064581  |
| H O | 2.177294  | -0.861664 | 1.371219  |
| H O | 2.091881  | -2.528699 | 0.812070  |

#### P-52+CP

B3LYP/6-31G(d) Geometry

|      |           |           |           |
|------|-----------|-----------|-----------|
| C O  | 0.956862  | -0.014436 | 1.450407  |
| C O  | 1.709010  | 0.412756  | 0.426047  |
| C O  | 1.381341  | -0.460809 | -0.780788 |
| C O  | -0.070666 | -0.109031 | -1.266299 |
| C O  | 0.110919  | -1.179571 | 0.942223  |
| C O  | -0.933542 | -0.548746 | -0.047161 |
| C O  | 1.099753  | -1.808777 | -0.069783 |
| C O  | -0.407880 | 1.379424  | -1.554435 |
| C O  | -1.621460 | 0.726369  | 0.493137  |
| Cl O | -2.229577 | -1.758941 | -0.488324 |
| O O  | -2.374938 | 0.757438  | 1.436958  |
| C O  | -1.155072 | 1.931516  | -0.323368 |
| H O  | 0.865867  | 0.425240  | 2.437933  |
| H O  | 2.374938  | 1.269755  | 0.413598  |
| H O  | 2.119109  | -0.463834 | -1.587070 |
| H O  | -0.297062 | -0.727306 | -2.138066 |
| H O  | -0.346213 | -1.817915 | 1.698109  |
| H O  | 1.984983  | -2.226670 | 0.418969  |
| H O  | 0.640875  | -2.563297 | -0.717277 |
| H O  | -1.051882 | 1.439457  | -2.437933 |
| H O  | 0.493855  | 1.957704  | -1.781995 |
| H O  | -2.014478 | 2.563297  | -0.571035 |
| H O  | -0.502465 | 2.527427  | 0.326034  |

### P-53+CP

B3LYP/6-31G(d) Geometry

|     |           |           |           |
|-----|-----------|-----------|-----------|
| C 0 | 0.533371  | 1.767164  | 0.943577  |
| C 0 | 1.398482  | 1.665935  | -0.075715 |
| C 0 | 0.694768  | 0.916702  | -1.199294 |
| C 0 | 0.525737  | -0.597922 | -0.744397 |
| C 0 | -0.764542 | 1.103850  | 0.507729  |
| C 0 | -0.516206 | -0.469911 | 0.442249  |
| C 0 | -0.749113 | 1.435796  | -1.002088 |
| C 0 | 0.142057  | -1.110003 | 1.714948  |
| C 0 | 1.811203  | -1.134102 | -0.090242 |
| O 0 | 2.818993  | -1.402712 | -0.707753 |
| C 0 | -1.795050 | -1.125810 | 0.162371  |
| C 0 | 0.140139  | -1.500434 | -1.924263 |
| N 0 | -2.818993 | -1.637029 | -0.040705 |
| C 0 | 1.642799  | -1.271494 | 1.421239  |
| H 0 | 0.721439  | 2.173248  | 1.931982  |
| H 0 | 2.441570  | 1.964488  | -0.089948 |
| H 0 | 1.140485  | 1.003968  | -2.191754 |
| H 0 | -1.658782 | 1.364986  | 1.077178  |
| H 0 | -1.506145 | 0.896739  | -1.580957 |
| H 0 | -0.837623 | 2.508844  | -1.195533 |
| H 0 | -0.312025 | -2.086507 | 1.905686  |
| H 0 | -0.053124 | -0.492022 | 2.596392  |
| H 0 | 0.999454  | -1.583336 | -2.596392 |
| H 0 | -0.130091 | -2.508844 | -1.593479 |
| H 0 | -0.710361 | -1.096045 | -2.480919 |
| H 0 | 2.246030  | -0.487162 | 1.892648  |
| H 0 | 2.053015  | -2.230466 | 1.753958  |

### P-54+CP

B3LYP/6-31G(d) Geometry

|     |           |           |           |
|-----|-----------|-----------|-----------|
| C 0 | -0.516405 | -2.043137 | -0.093516 |
| C 0 | -1.263172 | -1.447610 | -1.034361 |
| C 0 | -1.723322 | -0.108622 | -0.473394 |
| C 0 | -0.478478 | 0.871526  | -0.389037 |
| C 0 | -0.466110 | -1.105282 | 1.105029  |
| C 0 | 0.412193  | 0.166482  | 0.711712  |
| C 0 | -1.883872 | -0.495885 | 1.016656  |
| C 0 | -0.962584 | 2.289363  | -0.047584 |
| C 0 | 0.387218  | 0.925906  | -1.691115 |
| C 0 | 1.702819  | -0.263582 | -0.004348 |
| C 0 | 0.781649  | 0.974155  | 1.963502  |
| O 0 | 2.669621  | -0.739178 | 0.555256  |
| C 0 | 1.596614  | -0.006418 | -1.505350 |
| H 0 | 0.042400  | -2.969623 | -0.178951 |
| H 0 | -1.445823 | -1.795322 | -2.046382 |
| H 0 | -2.586697 | 0.343302  | -0.970676 |
| H 0 | -0.156666 | -1.551328 | 2.052694  |
| H 0 | -2.669621 | -1.240709 | 1.177895  |
| H 0 | -2.049064 | 0.352220  | 1.688625  |
| H 0 | -1.606014 | 2.319557  | 0.837352  |
| H 0 | -1.538761 | 2.695447  | -0.888557 |
| H 0 | -0.121877 | 2.969623  | 0.129509  |
| H 0 | 0.738600  | 1.953052  | -1.844940 |
| H 0 | -0.207453 | 0.667707  | -2.574363 |
| H 0 | 1.482292  | 0.389524  | 2.567703  |
| H 0 | -0.096210 | 1.208150  | 2.574363  |
| H 0 | 1.275330  | 1.918924  | 1.710170  |
| H 0 | 2.539975  | 0.403124  | -1.881722 |
| H 0 | 1.452250  | -0.976571 | -1.995257 |

### P-55+CP

B3LYP/6-31G(d) Geometry

|     |           |           |           |
|-----|-----------|-----------|-----------|
| C 0 | -0.553942 | 0.670534  | 1.167692  |
| C 0 | -0.553941 | -0.670535 | 1.167692  |
| C 0 | -0.690982 | -1.132130 | -0.276950 |
| C 0 | -0.690983 | 1.132127  | -0.276951 |
| C 0 | -1.585754 | -0.000002 | -0.842471 |
| C 0 | 0.659024  | -0.771215 | -1.014823 |
| C 0 | 0.659024  | 0.771213  | -1.014823 |
| C 0 | 1.920991  | -1.153399 | -0.265162 |
| C 0 | 1.920990  | 1.153398  | -0.265162 |
| O 0 | 2.348001  | 2.242866  | -0.010726 |
| O 0 | 2.348003  | -2.242866 | -0.010726 |
| O 0 | 2.588790  | 0.000000  | 0.139414  |
| H 0 | -0.380712 | 1.330199  | 2.011114  |
| H 0 | -0.380710 | -1.330199 | 2.011115  |
| H 0 | -1.008966 | -2.163632 | -0.432848 |
| H 0 | -1.008967 | 2.163630  | -0.432849 |
| H 0 | -2.588790 | -0.000002 | -0.406080 |
| H 0 | -1.658939 | -0.000002 | -1.936789 |
| H 0 | 0.682771  | -1.222260 | -2.011115 |
| H 0 | 0.682770  | 1.222258  | -2.011115 |

### P-56+CP

B3LYP/6-31G(d) Geometry

|     |           |           |           |
|-----|-----------|-----------|-----------|
| C 0 | 0.537598  | -1.089933 | 1.024657  |
| C 0 | 0.973304  | 0.167329  | 1.190354  |
| C 0 | 1.244603  | 0.746872  | -0.191669 |
| C 0 | -0.140305 | 0.954415  | -0.911687 |
| C 0 | 0.508691  | -1.371186 | -0.471059 |
| C 0 | -0.653697 | -0.497135 | -1.082867 |
| C 0 | 1.724229  | -0.528910 | -0.930330 |
| C 0 | -1.958192 | -0.559768 | -0.304226 |
| O 0 | -2.674071 | -1.515000 | -0.139857 |
| C 0 | -1.263010 | 1.657946  | -0.121431 |
| O 0 | -2.238139 | 0.658202  | 0.238031  |
| H 0 | 0.160992  | -1.764358 | 1.786101  |
| H 0 | 1.036191  | 0.720840  | 2.121571  |
| H 0 | 1.897640  | 1.622348  | -0.229171 |
| H 0 | 0.022720  | 1.450068  | -1.873196 |
| H 0 | 0.468217  | -2.419957 | -0.768495 |
| H 0 | -0.841753 | -0.785695 | -2.121571 |
| H 0 | 2.674071  | -0.911515 | -0.544527 |
| H 0 | 1.789737  | -0.408221 | -2.018749 |
| H 0 | -1.776085 | 2.419957  | -0.717070 |
| H 0 | -0.911700 | 2.119928  | 0.805990  |

### P-57+CP

B3LYP/6-31G(d) Geometry

|     |           |           |           |
|-----|-----------|-----------|-----------|
| C 0 | -1.482205 | 1.180368  | 0.868098  |
| C 0 | -1.645346 | -0.116812 | 1.165576  |
| C 0 | -1.599179 | -0.897998 | -0.140771 |
| C 0 | -0.121025 | -0.860005 | -0.676628 |
| C 0 | -1.329210 | 1.288740  | -0.643988 |
| C 0 | 0.068819  | 0.670350  | -0.996646 |
| C 0 | -2.255165 | 0.132680  | -1.092696 |
| C 0 | 1.241734  | 1.359263  | -0.310501 |
| O 0 | 1.190787  | 2.534631  | 0.005371  |
| C 0 | 0.968670  | -1.439142 | 0.231177  |
| C 0 | 2.509348  | 0.539362  | -0.051477 |
| C 0 | 2.352237  | -0.977618 | -0.251776 |
| H 0 | -1.366166 | 2.009303  | 1.557133  |
| H 0 | -1.698838 | -0.560893 | 2.154631  |

|     |           |           |           |
|-----|-----------|-----------|-----------|
| H O | -2.029783 | -1.902853 | -0.117761 |
| H O | -0.094970 | -1.417371 | -1.622421 |
| H O | -1.496953 | 2.276251  | -1.075181 |
| H O | 0.256367  | 0.790436  | -2.075017 |
| H O | -3.307122 | 0.319595  | -0.856631 |
| H O | -2.156535 | -0.126157 | -2.154631 |
| H O | 0.905244  | -2.534631 | 0.241212  |
| H O | 0.820231  | -1.101031 | 1.266031  |
| H O | 2.804902  | 0.765274  | 0.980948  |
| H O | 3.307122  | 0.951791  | -0.683959 |
| H O | 2.470086  | -1.238205 | -1.312873 |
| H O | 3.151001  | -1.503862 | 0.284107  |

#### P-58+CP

B3LYP/6-31G(d) Geometry

|     |           |           |           |
|-----|-----------|-----------|-----------|
| C O | -1.489774 | -0.890125 | -1.582432 |
| C O | -1.669031 | 0.437253  | -1.530131 |
| C O | -1.620178 | 0.847474  | -0.063579 |
| C O | -0.137346 | 0.688024  | 0.435373  |
| C O | -1.317090 | -1.386654 | -0.151562 |
| C O | 0.091580  | -0.874005 | 0.340119  |
| C O | -2.260600 | -0.402992 | 0.582628  |
| C O | 1.213032  | -1.294548 | -0.616497 |
| O O | 1.153492  | -2.341792 | -1.236094 |
| C O | 0.912070  | 1.536001  | -0.295330 |
| C O | 2.452421  | -0.401179 | -0.729937 |
| C O | 2.321294  | 0.974807  | -0.061016 |
| C O | 0.476781  | -1.490247 | 1.707162  |
| H O | -1.375252 | -1.510068 | -2.464139 |
| H O | -1.742665 | 1.123562  | -2.367815 |
| H O | -2.059204 | 1.818985  | 0.180447  |
| H O | -0.108846 | 0.967804  | 1.497548  |
| H O | -1.471083 | -2.455378 | 0.005476  |
| H O | -3.308032 | -0.539353 | 0.297264  |
| H O | -2.178051 | -0.425213 | 1.675390  |
| H O | 0.846136  | 2.578231  | 0.041904  |
| H O | 0.709031  | 1.539598  | -1.375328 |
| H O | 2.639203  | -0.288882 | -1.805751 |
| H O | 3.308032  | -0.968157 | -0.339833 |
| H O | 2.510532  | 0.898169  | 1.018586  |
| H O | 3.084998  | 1.653501  | -0.459163 |
| H O | -0.283162 | -1.270075 | 2.464139  |
| H O | 1.430412  | -1.093875 | 2.077114  |
| H O | 0.573565  | -2.578231 | 1.621814  |

#### P-59+CP

B3LYP/6-31G(d) Geometry

|     |           |           |           |
|-----|-----------|-----------|-----------|
| C O | 1.272300  | -1.793523 | 0.790951  |
| C O | 1.620525  | -0.609113 | 1.313614  |
| C O | 1.800726  | 0.368030  | 0.157768  |
| C O | 0.364459  | 0.682250  | -0.445151 |
| C O | 1.233072  | -1.628647 | -0.722606 |
| C O | -0.013645 | -0.723677 | -1.059090 |
| C O | 2.371920  | -0.602062 | -0.907273 |
| C O | -1.331083 | -1.388847 | -0.659505 |
| O O | -1.556095 | -2.536657 | -1.001874 |
| C O | -0.646266 | 1.179311  | 0.615609  |
| C O | -2.351098 | -0.609903 | 0.164693  |
| C O | -2.101303 | 0.900826  | 0.215047  |
| C O | 0.471217  | 1.751699  | -1.551659 |
| H O | 0.981700  | -2.693680 | 1.322622  |
| H O | 1.676725  | -0.347731 | 2.365617  |
| H O | 2.380861  | 1.268775  | 0.378445  |

|     |           |           |           |
|-----|-----------|-----------|-----------|
| H O | 1.263635  | -2.546650 | -1.310126 |
| H O | -0.072001 | -0.634834 | -2.153522 |
| H O | 3.348817  | -1.005156 | -0.624046 |
| H O | 2.433348  | -0.184112 | -1.917376 |
| H O | -0.495183 | 2.253844  | 0.782843  |
| H O | -0.461060 | 0.684578  | 1.576544  |
| H O | -2.294610 | -1.023786 | 1.183244  |
| H O | -3.348817 | -0.865144 | -0.210014 |
| H O | -2.325769 | 1.353787  | -0.759939 |
| H O | -2.788180 | 1.365307  | 0.932838  |
| H O | 1.135864  | 1.445681  | -2.365617 |
| H O | 0.855648  | 2.693680  | -1.141190 |
| H O | -0.508344 | 1.962770  | -1.997517 |

#### P-60+CP

B3LYP/6-31G(d) Geometry

|     |           |           |           |
|-----|-----------|-----------|-----------|
| C O | 1.263646  | -1.980412 | 0.246356  |
| C O | 1.559568  | -1.007903 | 1.120553  |
| C O | 1.727730  | 0.282084  | 0.332299  |
| C O | 0.280691  | 0.720021  | -0.175362 |
| C O | 1.226125  | -1.353994 | -1.141288 |
| C O | -0.056916 | -0.452329 | -1.192979 |
| C O | 2.321387  | -0.273938 | -0.983611 |
| C O | -1.353918 | -1.213772 | -0.925623 |
| O O | -1.447909 | -2.388942 | -1.227841 |
| C O | -0.795155 | 0.888034  | 0.921904  |
| C O | -2.535848 | -0.470025 | -0.303646 |
| C O | -2.198273 | 0.904161  | 0.299913  |
| C O | 0.398568  | 1.994968  | -0.900705 |
| N O | 0.488268  | 3.008652  | -1.462333 |
| H O | 0.998129  | -3.008652 | 0.463630  |
| H O | 1.592107  | -1.081144 | 2.202525  |
| H O | 2.264017  | 1.093451  | 0.828540  |
| H O | 1.301831  | -2.041570 | -1.983497 |
| H O | -0.164907 | -0.031916 | -2.202525 |
| H O | 3.316641  | -0.703364 | -0.840469 |
| H O | 2.349670  | 0.457090  | -1.799358 |
| H O | -0.604560 | 1.805642  | 1.489313  |
| H O | -0.713226 | 0.046977  | 1.620945  |
| H O | -2.941144 | -1.144479 | 0.460803  |
| H O | -3.316641 | -0.391254 | -1.071943 |
| H O | -2.245543 | 1.687960  | -0.466428 |
| H O | -2.946308 | 1.167874  | 1.055672  |

#### P-61+CP

B3LYP/6-31G(d) Geometry

|      |           |           |           |
|------|-----------|-----------|-----------|
| C O  | -1.679368 | 0.008880  | 1.198540  |
| C O  | -1.964070 | -1.018552 | 0.386773  |
| C O  | -1.751183 | -0.542911 | -1.045961 |
| C O  | -0.208879 | -0.353130 | -1.265656 |
| C O  | -1.281080 | 1.193898  | 0.321084  |
| C O  | 0.113148  | 0.811239  | -0.260334 |
| C O  | -2.186343 | 0.937271  | -0.907565 |
| C O  | 1.179817  | 0.496108  | 0.800577  |
| O O  | 1.066994  | 0.910074  | 1.936864  |
| C O  | 0.694933  | -1.577786 | -1.080191 |
| C O  | 2.370489  | -0.357711 | 0.370856  |
| C O  | 2.160268  | -1.134925 | -0.941952 |
| Cl O | 0.862902  | 2.253902  | -1.167250 |
| H O  | -1.624749 | 0.010134  | 2.280483  |
| H O  | -2.214047 | -2.033950 | 0.676825  |
| H O  | -2.230500 | -1.134199 | -1.830359 |
| H O  | -0.053852 | 0.027605  | -2.280483 |



|     |           |           |           |
|-----|-----------|-----------|-----------|
| H O | -1.302644 | 2.175165  | 0.793084  |
| H O | -3.247698 | 1.047683  | -0.668405 |
| H O | -1.935817 | 1.554984  | -1.776530 |
| H O | 0.573294  | -2.253902 | -1.935384 |
| H O | 0.398601  | -2.141350 | -0.184518 |
| H O | 2.560029  | -1.040690 | 1.207564  |
| H O | 3.247698  | 0.299093  | 0.311942  |
| H O | 2.429612  | -0.506943 | -1.800371 |
| H O | 2.831873  | -2.000703 | -0.964604 |

#### P-62+CP

B3LYP/6-31G(d) Geometry

|     |           |           |           |
|-----|-----------|-----------|-----------|
| C O | -1.179317 | -2.066185 | -0.728185 |
| C O | -1.549427 | -1.159621 | -1.643207 |
| C O | -1.787502 | 0.152911  | -0.912982 |
| C O | -0.366774 | 0.710415  | -0.448593 |
| C O | -1.158367 | -1.369675 | 0.626267  |
| C O | 0.079161  | -0.389647 | 0.632485  |
| C O | -2.327987 | -0.376081 | 0.433567  |
| C O | 1.378060  | -1.117440 | 0.253492  |
| O O | 1.524709  | -2.295242 | 0.523699  |
| C O | 0.663092  | 0.888418  | -1.590773 |
| C O | 2.513147  | -0.322728 | -0.394079 |
| C O | 2.084082  | 1.011092  | -1.028309 |
| C O | -0.570602 | 2.028952  | 0.170703  |
| C O | 0.340529  | 0.174623  | 2.049768  |
| N O | -0.735240 | 3.085524  | 0.626209  |
| H O | -0.853625 | -3.085524 | -0.898600 |
| H O | -1.597612 | -1.288415 | -2.719373 |
| H O | -2.380183 | 0.904652  | -1.438468 |
| H O | -1.184049 | -2.022842 | 1.499316  |
| H O | -3.290983 | -0.882234 | 0.324507  |
| H O | -2.408490 | 0.391295  | 1.210535  |
| H O | 0.397134  | 1.765031  | -2.191690 |
| H O | 0.606261  | 0.012386  | -2.248213 |
| H O | 2.953897  | -0.991363 | -1.142880 |
| H O | 3.290983  | -0.176607 | 0.367519  |
| H O | 2.116364  | 1.825267  | -0.293364 |
| H O | 2.786759  | 1.286869  | -1.822342 |
| H O | -0.545442 | 0.672092  | 2.453209  |
| H O | 1.154930  | 0.907089  | 2.056381  |
| H O | 0.613087  | -0.647625 | 2.719373  |

#### P-63+CP

B3LYP/6-31G(d) Geometry

|     |           |           |           |
|-----|-----------|-----------|-----------|
| C O | -1.348258 | -1.815868 | -1.083321 |
| C O | -1.616261 | -0.647905 | -1.683159 |
| C O | -1.703349 | 0.414996  | -0.596084 |
| C O | -0.246900 | 0.680184  | -0.023662 |
| C O | -1.258750 | -1.547545 | 0.413601  |
| C O | 0.074241  | -0.732453 | 0.665392  |
| C O | -2.320038 | -0.433115 | 0.542265  |
| C O | 1.273282  | -1.489022 | 0.067753  |
| O O | 1.301434  | -2.707415 | 0.081948  |
| C O | 0.781226  | 1.033226  | -1.123921 |
| C O | 2.467906  | -0.707743 | -0.481462 |
| C O | 2.223938  | 0.796337  | -0.657479 |
| C O | -0.307624 | 1.868178  | 0.960788  |
| C O | 0.389705  | -0.664704 | 2.180504  |
| H O | -1.131055 | -2.769477 | -1.550680 |
| H O | -1.673453 | -0.454618 | -2.749758 |
| H O | -2.223363 | 1.337361  | -0.871670 |

|     |           |           |           |
|-----|-----------|-----------|-----------|
| H O | -1.354458 | -2.420874 | 1.060496  |
| H O | -3.326600 | -0.788362 | 0.302243  |
| H O | -2.342027 | 0.062109  | 1.518167  |
| H O | 0.641396  | 2.077804  | -1.431112 |
| H O | 0.605244  | 0.417527  | -2.015181 |
| H O | 2.710223  | -1.176551 | -1.443611 |
| H O | 3.326600  | -0.913905 | 0.171353  |
| H O | 2.411115  | 1.329289  | 0.283423  |
| H O | 2.936385  | 1.204908  | -1.383939 |
| H O | -1.020256 | 1.717322  | 1.775522  |
| H O | -0.618532 | 2.769477  | 0.418853  |
| H O | 0.665204  | 2.083185  | 1.415748  |
| H O | -0.445026 | -0.246225 | 2.749758  |
| H O | 1.275184  | -0.054502 | 2.393110  |
| H O | 0.580677  | -1.675939 | 2.554324  |

#### P-64+CP

B3LYP/6-31G(d) Geometry

|     |           |           |           |
|-----|-----------|-----------|-----------|
| C O | 1.241738  | -1.481764 | 0.085345  |
| C O | 0.004025  | -1.129725 | -0.752094 |
| O O | 1.483193  | -0.490157 | 1.101431  |
| C O | 2.548633  | -1.374170 | -0.717420 |
| C O | 2.014469  | 0.584794  | 0.359412  |
| C O | -0.119765 | 0.402339  | -1.084403 |
| O O | 2.872319  | 0.020894  | -0.633433 |
| C O | -1.402178 | -1.446170 | -0.124849 |
| C O | 0.862630  | 1.309071  | -0.348892 |
| C O | -1.570112 | -0.634512 | 1.152656  |
| C O | -2.291171 | -0.621085 | -1.089189 |
| C O | -1.624392 | 0.721696  | -0.714581 |
| O O | 0.744549  | 2.517328  | -0.314415 |
| C O | -1.720446 | 0.650293  | 0.802608  |
| H O | 1.128866  | -2.444506 | 0.591817  |
| H O | 0.074917  | -1.700349 | -1.687098 |
| H O | 2.444676  | -1.656546 | -1.769564 |
| H O | 3.350467  | -1.966920 | -0.259830 |
| H O | 2.570036  | 1.257637  | 1.017377  |
| H O | 0.035230  | 0.575659  | -2.156718 |
| H O | -1.608907 | -2.517328 | -0.047672 |
| H O | -1.476674 | -1.034116 | 2.156718  |
| H O | -3.350467 | -0.652020 | -0.817752 |
| H O | -2.172146 | -0.899270 | -2.143915 |
| H O | -1.999464 | 1.630816  | -1.185626 |
| H O | -1.767007 | 1.512414  | 1.458808  |

#### P-65+CP

B3LYP/6-31G(d) Geometry

|     |           |           |           |
|-----|-----------|-----------|-----------|
| C O | -1.251695 | -1.486168 | -0.041521 |
| C O | 0.005374  | -0.870729 | 0.589069  |
| O O | -1.485574 | -0.958675 | -1.361238 |
| C O | -2.548444 | -1.050532 | 0.657815  |
| C O | -1.972070 | 0.333739  | -1.084863 |
| C O | 0.156379  | 0.686832  | 0.366988  |
| O O | -2.836042 | 0.217684  | 0.049679  |
| C O | 1.382733  | -1.428437 | 0.079642  |
| C O | -0.794881 | 1.240409  | -0.702136 |
| C O | 1.527273  | -1.119803 | -1.405569 |
| C O | 2.321487  | -0.349635 | 0.670705  |
| C O | 1.663795  | 0.798434  | -0.128599 |
| O O | -0.647073 | 2.336894  | -1.204444 |
| C O | 1.715067  | 0.201181  | -1.527945 |
| C O | -0.080139 | 1.507286  | 1.652012  |
| H O | -1.162198 | -2.572031 | -0.137650 |

|     |           |           |           |
|-----|-----------|-----------|-----------|
| H O | -0.046937 | -1.072936 | 1.667523  |
| H O | -2.444533 | -0.917106 | 1.738734  |
| H O | -3.368495 | -1.750277 | 0.454786  |
| H O | -2.515573 | 0.724738  | -1.948449 |
| H O | 1.563128  | -2.465726 | 0.376621  |
| H O | 1.397211  | -1.842015 | -2.204166 |
| H O | 3.368495  | -0.502178 | 0.392851  |
| H O | 2.245195  | -0.247198 | 1.759560  |
| H O | 2.073308  | 1.803266  | -0.013994 |
| H O | 1.763249  | 0.779504  | -2.443923 |
| H O | 0.614164  | 1.206281  | 2.443923  |
| H O | -1.102448 | 1.376306  | 2.023238  |
| H O | 0.067852  | 2.572031  | 1.445475  |

#### P-66+CP

B3LYP/6-31G(d) Geometry

|     |           |           |           |
|-----|-----------|-----------|-----------|
| C O | 1.224003  | -0.827744 | 0.438465  |
| C O | 0.021343  | -0.725417 | -0.542104 |
| O O | 1.458970  | 0.422377  | 1.116448  |
| C O | 2.604953  | -1.004927 | -0.214139 |
| C O | 2.075934  | 1.200432  | 0.118639  |
| C O | -0.066457 | 0.687443  | -1.239965 |
| O O | 2.951765  | 0.330641  | -0.604942 |
| C O | -1.383526 | -0.779064 | 0.198487  |
| C O | 1.007087  | 1.701789  | -0.858733 |
| C O | -1.429164 | 0.306313  | 1.267172  |
| C O | -2.296318 | -0.119736 | -0.868774 |
| C O | -1.515525 | 1.209900  | -0.851925 |
| O O | 1.012130  | 2.837807  | -1.289195 |
| C O | -1.516691 | 1.488211  | 0.643340  |
| C O | 0.106948  | -1.885197 | -1.557611 |
| H O | 1.028269  | -1.580521 | 1.208045  |
| H O | 2.634368  | -1.647569 | -1.094402 |
| H O | 3.324606  | -1.376703 | 0.526649  |
| H O | 2.629862  | 2.025552  | 0.573468  |
| H O | -0.019996 | 0.576918  | -2.330476 |
| H O | -1.647832 | -1.788585 | 0.528083  |
| H O | -1.301450 | 0.134750  | 2.330476  |
| H O | -3.324606 | -0.002183 | -0.515003 |
| H O | -2.305748 | -0.619076 | -1.842662 |
| H O | -1.857004 | 2.017830  | -1.500321 |
| H O | -1.470291 | 2.475493  | 1.090224  |
| H O | 0.303719  | -2.837807 | -1.048345 |
| H O | 0.902362  | -1.728208 | -2.293068 |
| H O | -0.825451 | -2.003798 | -2.114686 |

#### P-67+CP

B3LYP/6-31G(d) Geometry

|     |           |           |           |
|-----|-----------|-----------|-----------|
| C O | -1.253495 | 0.559535  | 0.690831  |
| C O | 0.003024  | 0.602817  | -0.232702 |
| O O | -1.535508 | -0.791186 | 1.069116  |
| C O | -2.566270 | 0.931888  | -0.017099 |
| C O | -2.135614 | -1.323585 | -0.094901 |
| C O | 0.052954  | -0.589512 | -1.278263 |
| O O | -2.953726 | -0.298161 | -0.647641 |
| C O | 1.403345  | 0.422353  | 0.513038  |
| C O | -1.034069 | -1.650461 | -1.109475 |
| C O | 1.399830  | -0.917064 | 1.232610  |
| C O | 2.295784  | 0.080394  | -0.705548 |
| C O | 1.500718  | -1.195255 | -1.055384 |
| O O | -1.017056 | -2.689236 | -1.735626 |
| C O | 1.482819  | -1.878444 | 0.303199  |
| C O | 0.026015  | 1.905891  | -0.910675 |

|     |           |           |           |
|-----|-----------|-----------|-----------|
| N O | 0.041687  | 2.950235  | -1.420545 |
| H O | -1.077872 | 1.135383  | 1.602523  |
| H O | -2.470047 | 1.710986  | -0.775787 |
| H O | -3.325603 | 1.226981  | 0.716808  |
| H O | -2.725963 | -2.206797 | 0.160159  |
| H O | -0.028632 | -0.203771 | -2.300123 |
| H O | 1.671892  | 1.297915  | 1.108091  |
| H O | 1.259348  | -1.042723 | 2.300123  |
| H O | 3.325603  | -0.139307 | -0.411684 |
| H O | 2.290845  | 0.845217  | -1.489440 |
| H O | 1.835432  | -1.795052 | -1.901779 |
| H O | 1.421396  | -2.950235 | 0.456157  |

#### P-68+CP

B3LYP/6-31G(d) Geometry

|      |           |           |           |
|------|-----------|-----------|-----------|
| C O  | 1.269920  | -1.061756 | -1.037254 |
| C O  | -0.010591 | -0.237785 | -1.228578 |
| O O  | 1.506342  | -1.336154 | 0.356184  |
| C O  | 2.544993  | -0.276452 | -1.394290 |
| C O  | 1.994995  | -0.099382 | 0.826969  |
| C O  | -0.172478 | 0.923886  | -0.180582 |
| O O  | 2.860759  | 0.413480  | -0.175528 |
| C O  | -1.380994 | -0.987729 | -1.086349 |
| C O  | 0.809623  | 0.860724  | 1.008864  |
| C O  | -1.505743 | -1.524384 | 0.335971  |
| C O  | -2.326374 | 0.236709  | -1.001178 |
| C O  | -1.668252 | 0.779774  | 0.286657  |
| O O  | 0.634035  | 1.490141  | 2.027601  |
| C O  | -1.693358 | -0.476959 | 1.149708  |
| Cl O | 0.098557  | 2.561757  | -0.977057 |
| H O  | 1.202630  | -2.023810 | -1.552595 |
| H O  | 0.023912  | 0.196249  | -2.233084 |
| H O  | 2.401081  | 0.453885  | -2.195320 |
| H O  | 3.370581  | -0.949621 | -1.653703 |
| H O  | 2.529316  | -0.239657 | 1.769576  |
| H O  | -1.561922 | -1.703671 | -1.892555 |
| H O  | -1.371217 | -2.561757 | 0.621584  |
| H O  | -3.370581 | -0.045583 | -0.841630 |
| H O  | -2.251411 | 0.915621  | -1.857403 |
| H O  | -2.059986 | 1.692225  | 0.734137  |
| H O  | -1.727625 | -0.475260 | 2.233084  |

#### P-69+CP

B3LYP/6-31G(d) Geometry

|     |           |           |           |
|-----|-----------|-----------|-----------|
| C O | 1.270092  | 0.534023  | -1.235500 |
| C O | -0.024291 | 0.582725  | -0.365526 |
| O O | 1.571056  | -0.814600 | -1.602836 |
| C O | 2.550502  | 0.909785  | -0.473307 |
| C O | 2.109814  | -1.344058 | -0.409994 |
| C O | -0.104322 | -0.568415 | 0.749031  |
| O O | 2.910079  | -0.320198 | 0.175412  |
| C O | -1.377394 | 0.342122  | -1.177012 |
| C O | 0.962577  | -1.659816 | 0.554501  |
| C O | -1.328238 | -1.033466 | -1.823851 |
| C O | -2.331968 | 0.057832  | 0.005993  |
| C O | -1.545743 | -1.187243 | 0.467321  |
| O O | 0.906439  | -2.714818 | 1.152454  |
| C O | -1.458087 | -1.943628 | -0.849676 |
| C O | -0.099903 | 1.933101  | 0.208533  |
| C O | 0.018346  | -0.069395 | 2.202562  |
| N O | -0.147402 | 3.021812  | 0.612560  |
| H O | 1.130166  | 1.110156  | -2.153237 |
| H O | 2.419354  | 1.690488  | 0.278447  |



|     |           |           |           |
|-----|-----------|-----------|-----------|
| H O | 3.342066  | 1.203865  | -1.172518 |
| H O | 2.705355  | -2.232988 | -0.630222 |
| H O | -1.619306 | 1.181788  | -1.832562 |
| H O | -1.133901 | -1.213697 | -2.874848 |
| H O | -3.342066 | -0.191507 | -0.329858 |
| H O | -2.382688 | 0.867474  | 0.741175  |
| H O | -1.926624 | -1.744043 | 1.324307  |
| H O | -1.388847 | -3.021812 | -0.940039 |
| H O | -0.778190 | 0.636984  | 2.452398  |
| H O | 0.978832  | 0.425280  | 2.378547  |
| H O | -0.048974 | -0.929466 | 2.874848  |

#### P-70+CP

B3LYP/6-31G(d) Geometry

|     |           |           |           |
|-----|-----------|-----------|-----------|
| C O | -1.247130 | -0.927836 | -0.722103 |
| C O | 0.019925  | -0.778006 | 0.162924  |
| O O | -1.483427 | 0.240368  | -1.528611 |
| C O | -2.585678 | -0.972493 | 0.036607  |
| C O | -2.000704 | 1.152163  | -0.592258 |
| C O | 0.160824  | 0.681063  | 0.805737  |
| O O | -2.874193 | 0.413803  | 0.267732  |
| C O | 1.364342  | -0.869757 | -0.678674 |
| C O | -0.860010 | 1.699886  | 0.269807  |
| C O | 1.366279  | 0.190827  | -1.772895 |
| C O | 2.360501  | -0.214517 | 0.310776  |
| C O | 1.613124  | 1.132901  | 0.315020  |
| O O | -0.779900 | 2.885134  | 0.527995  |
| C O | 1.532373  | 1.381965  | -1.183216 |
| C O | 0.007992  | -1.947481 | 1.174544  |
| C O | 0.065725  | 0.734909  | 2.343937  |
| H O | -1.129197 | -1.773134 | -1.406991 |
| H O | -2.569002 | -1.492497 | 0.995160  |
| H O | -3.365758 | -1.413614 | -0.596995 |
| H O | -2.540360 | 1.953682  | -1.102535 |
| H O | 1.582438  | -1.891804 | -1.004026 |
| H O | 1.165596  | -0.000778 | -2.821185 |
| H O | 3.365758  | -0.127950 | -0.111760 |
| H O | 2.426656  | -0.698291 | 1.289461  |
| H O | 2.019970  | 1.944156  | 0.920903  |
| H O | 1.490712  | 2.361324  | -1.647202 |
| H O | -0.223055 | -2.885134 | 0.652083  |
| H O | -0.734440 | -1.821921 | 1.966613  |
| H O | 0.975945  | -2.085123 | 1.660702  |
| H O | 0.837944  | 0.124160  | 2.821185  |
| H O | -0.912094 | 0.392835  | 2.699822  |
| H O | 0.192852  | 1.771207  | 2.669806  |

#### TS-1+CH

B3LYP/6-31G(d) Geometry

|     |           |           |           |
|-----|-----------|-----------|-----------|
| C O | 0.331026  | -1.351324 | 0.774833  |
| C O | 0.908767  | -0.216113 | 1.371979  |
| C O | 1.450834  | 0.765034  | 0.541886  |
| C O | 0.374896  | -1.480444 | -0.598319 |
| C O | 2.185232  | 0.320708  | -0.714493 |
| C O | 1.512373  | -0.900450 | -1.406504 |
| H O | -0.322853 | -1.992820 | 1.359451  |
| H O | 0.705390  | 0.002557  | 2.417643  |
| H O | 1.830567  | 1.676670  | 1.001027  |
| H O | -0.224550 | -2.248467 | -1.081966 |
| H O | 3.205223  | 0.049339  | -0.413960 |
| H O | 2.289809  | 1.158278  | -1.413385 |
| H O | 2.259548  | -1.695328 | -1.541996 |
| H O | 1.172081  | -0.650426 | -2.417643 |
| C O | -0.286807 | 1.554548  | -0.348966 |

|     |           |           |           |
|-----|-----------|-----------|-----------|
| C O | -1.003426 | 0.561486  | -1.026216 |
| C O | -2.211531 | 0.028612  | -0.493867 |
| N O | -3.205223 | -0.401172 | -0.059048 |
| H O | 0.299526  | 2.248467  | -0.944546 |
| H O | -0.719735 | 1.982166  | 0.548890  |
| H O | -0.841846 | 0.396376  | -2.086143 |

#### TS-2+CH

B3LYP/6-31G(d) Geometry

|     |           |           |           |
|-----|-----------|-----------|-----------|
| C O | 0.567178  | -0.943566 | 1.172556  |
| C O | 1.391318  | 0.194972  | 1.231646  |
| C O | 1.734163  | 0.830927  | 0.036460  |
| C O | 0.221272  | -1.451373 | -0.063008 |
| C O | 2.016328  | -0.019763 | -1.193749 |
| C O | 1.161633  | -1.321117 | -1.237965 |
| H O | 0.054088  | -1.286467 | 2.067965  |
| H O | 1.529019  | 0.710209  | 2.179656  |
| H O | 2.306462  | 1.755632  | 0.096241  |
| H O | -0.562886 | -2.200238 | -0.140997 |
| H O | 3.080194  | -0.287179 | -1.171743 |
| H O | 1.873271  | 0.573782  | -2.103985 |
| H O | 0.610385  | -1.404546 | -2.179656 |
| H O | 1.830427  | -2.193723 | -1.209646 |
| C O | -0.122653 | 1.621185  | -0.525023 |
| C O | -1.005206 | 0.597081  | -0.876161 |
| C O | -2.134224 | 0.223998  | -0.028686 |
| O O | -3.080194 | -0.468401 | -0.374257 |
| H O | 0.343319  | 2.200238  | -1.318305 |
| H O | -0.333966 | 2.193388  | 0.375029  |
| H O | -1.034537 | 0.219573  | -1.894608 |
| H O | -2.083862 | 0.643719  | 1.004182  |

#### TS-3+CH

B3LYP/6-31G(d) Geometry

|     |           |           |           |
|-----|-----------|-----------|-----------|
| C O | 1.428321  | -1.313914 | 1.057986  |
| C O | 2.418103  | -0.337197 | 1.286364  |
| C O | 2.894207  | 0.416834  | 0.204539  |
| C O | 1.063591  | -1.614861 | -0.232438 |
| C O | 3.048076  | -0.273706 | -1.146463 |
| C O | 1.988912  | -1.386390 | -1.397600 |
| H O | 0.848719  | -1.703246 | 1.891020  |
| H O | 2.621111  | -0.008994 | 2.303212  |
| H O | 3.660310  | 1.160319  | 0.420675  |
| H O | 0.172176  | -2.210670 | -0.415014 |
| H O | 4.051317  | -0.715676 | -1.168929 |
| H O | 3.026569  | 0.469673  | -1.951146 |
| H O | 1.406645  | -1.192162 | -2.303212 |
| H O | 2.499822  | -2.342987 | -1.584210 |
| C O | 1.346832  | 1.655864  | -0.099737 |
| C O | 0.296765  | 1.000086  | -0.766037 |
| C O | -0.858380 | 0.516399  | -0.100529 |
| O O | -1.842059 | 0.024684  | -0.712049 |
| B O | -3.040946 | -0.669691 | 0.061211  |
| H O | 1.950542  | 2.342987  | -0.689218 |
| H O | 1.166521  | 2.005933  | 0.913210  |
| H O | 0.313600  | 0.902218  | -1.847756 |
| H O | -0.912075 | 0.582766  | 0.993904  |
| H O | -2.892502 | -1.855154 | -0.179649 |
| H O | -4.051317 | -0.220171 | -0.429942 |
| H O | -2.892137 | -0.398187 | 1.241311  |

### TS-4+CH

B3LYP/6-31G(d) Geometry

|   |   |           |           |           |
|---|---|-----------|-----------|-----------|
| C | 0 | -0.166123 | 0.310655  | 1.414059  |
| C | 0 | -0.675505 | -0.976408 | 1.140150  |
| C | 0 | -1.270677 | -1.208707 | -0.100345 |
| C | 0 | -0.281261 | 1.294464  | 0.460306  |
| C | 0 | -2.081214 | -0.077687 | -0.717237 |
| C | 0 | -1.393515 | 1.306329  | -0.560558 |
| H | 0 | 0.499179  | 0.450797  | 2.260747  |
| H | 0 | -0.396822 | -1.807228 | 1.782126  |
| H | 0 | -1.631377 | -2.213009 | -0.316523 |
| H | 0 | 0.291616  | 2.213009  | 0.568163  |
| H | 0 | -3.051874 | -0.060525 | -0.205064 |
| H | 0 | -2.297512 | -0.286744 | -1.770664 |
| H | 0 | -1.019702 | 1.681468  | -1.520270 |
| H | 0 | -2.138143 | 2.046639  | -0.235516 |
| C | 0 | 0.392491  | -1.203200 | -1.352557 |
| C | 0 | 1.143444  | -0.045812 | -1.193082 |
| N | 0 | 2.272216  | -0.061718 | -0.319097 |
| O | 0 | 2.398318  | -1.027333 | 0.454619  |
| O | 0 | 3.051874  | 0.900560  | -0.364076 |
| H | 0 | -0.197354 | -1.288380 | -2.260747 |
| H | 0 | 0.821188  | -2.123602 | -0.975544 |
| H | 0 | 1.119205  | 0.821115  | -1.835719 |

### TS-5+CH

B3LYP/6-31G(d) Geometry

|   |   |           |           |           |
|---|---|-----------|-----------|-----------|
| C | 0 | -0.532232 | 0.848972  | 1.079975  |
| C | 0 | -1.148836 | -0.398327 | 1.286826  |
| C | 0 | -1.632832 | -1.089741 | 0.185333  |
| C | 0 | -0.437663 | 1.333922  | -0.212813 |
| C | 0 | -2.249149 | -0.312307 | -0.963575 |
| C | 0 | -1.533166 | 1.046979  | -1.218577 |
| H | 0 | 0.066027  | 1.291237  | 1.871949  |
| H | 0 | -1.021973 | -0.907521 | 2.239522  |
| H | 0 | -2.000583 | -2.105511 | 0.319982  |
| H | 0 | 0.174523  | 2.209978  | -0.408769 |
| H | 0 | -3.299754 | -0.124119 | -0.704869 |
| H | 0 | -2.271578 | -0.923056 | -1.873066 |
| H | 0 | -1.138953 | 1.103032  | -2.239522 |
| H | 0 | -2.267086 | 1.860639  | -1.142204 |
| C | 0 | 0.295428  | -1.536052 | -0.844225 |
| C | 0 | 0.965832  | -0.343070 | -1.070156 |
| C | 0 | 2.222768  | -0.044298 | -0.318642 |
| F | 0 | 3.299754  | -0.656537 | -0.884473 |
| F | 0 | 2.168938  | -0.471571 | 0.964754  |
| F | 0 | 2.527166  | 1.277620  | -0.294568 |
| H | 0 | -0.246188 | -2.004521 | -1.658950 |
| H | 0 | 0.650517  | -2.209978 | -0.073221 |
| H | 0 | 0.926474  | 0.131944  | -2.045006 |

### TS-6+CH

B3LYP/6-31G(d) Geometry

|   |   |           |           |           |
|---|---|-----------|-----------|-----------|
| C | 0 | -0.816328 | -0.421293 | 1.596756  |
| C | 0 | -1.703046 | -1.268245 | 0.912980  |
| C | 0 | -2.183150 | -0.869638 | -0.338681 |
| C | 0 | -0.525787 | 0.821047  | 1.063668  |
| C | 0 | -2.487417 | 0.603540  | -0.575532 |
| C | 0 | -1.567600 | 1.553943  | 0.245511  |
| H | 0 | -0.232682 | -0.809285 | 2.427553  |
| H | 0 | -1.811042 | -2.303090 | 1.229903  |
| H | 0 | -2.829894 | -1.561613 | -0.876213 |
| H | 0 | 0.243647  | 1.436078  | 1.523534  |

|   |   |           |           |           |
|---|---|-----------|-----------|-----------|
| H | 0 | -3.532407 | 0.774495  | -0.286893 |
| H | 0 | -2.428060 | 0.830966  | -1.645998 |
| H | 0 | -1.096226 | 2.303090  | -0.397322 |
| H | 0 | -2.183389 | 2.121437  | 0.959405  |
| C | 0 | -0.471063 | -1.074229 | -1.518394 |
| C | 0 | 0.405725  | -0.030336 | -1.205581 |
| B | 0 | 1.635542  | -0.094764 | -0.284526 |
| C | 0 | 2.100599  | -1.448743 | 0.413710  |
| C | 0 | 2.603144  | 1.167373  | -0.173284 |
| H | 0 | -1.068598 | -1.009451 | -2.427553 |
| H | 0 | -0.204663 | -2.091441 | -1.244607 |
| H | 0 | 0.201627  | 0.911120  | -1.721096 |
| H | 0 | 2.927154  | -1.876669 | -0.176372 |
| H | 0 | 2.511562  | -1.284247 | 1.418857  |
| H | 0 | 1.331737  | -2.226417 | 0.487508  |
| H | 0 | 3.532407  | 0.959475  | -0.727178 |
| H | 0 | 2.189504  | 2.096726  | -0.585453 |
| H | 0 | 2.921800  | 1.365221  | 0.859826  |

### TS-7+CH

B3LYP/6-31G(d) Geometry

|    |   |           |           |           |
|----|---|-----------|-----------|-----------|
| C  | 0 | 0.449098  | -0.480937 | -1.637391 |
| C  | 0 | 1.267241  | -1.302517 | -0.840605 |
| C  | 0 | 1.754611  | -0.803954 | 0.372434  |
| C  | 0 | 0.234065  | 0.824963  | -1.258158 |
| C  | 0 | 2.135000  | 0.669168  | 0.455818  |
| C  | 0 | 1.253420  | 1.583899  | -0.443819 |
| H  | 0 | -0.145074 | -0.923266 | -2.431752 |
| H  | 0 | 1.314194  | -2.369395 | -1.044905 |
| H  | 0 | 2.374770  | -1.468033 | 0.972824  |
| H  | 0 | -0.517820 | 1.419215  | -1.771456 |
| H  | 0 | 3.182417  | 0.752468  | 0.140273  |
| H  | 0 | 2.106340  | 1.005247  | 1.498404  |
| H  | 0 | 0.764497  | 2.369395  | 0.139856  |
| H  | 0 | 1.896752  | 2.113369  | -1.162564 |
| C  | 0 | 0.073005  | -0.851047 | 1.535550  |
| C  | 0 | -0.816169 | 0.160371  | 1.142128  |
| B  | 0 | -2.054974 | -0.034999 | 0.305690  |
| Cl | 0 | -2.548103 | -1.644446 | -0.310589 |
| Cl | 0 | -3.182417 | 1.322614  | -0.008121 |
| H  | 0 | 0.670198  | -0.688617 | 2.431752  |
| H  | 0 | -0.223794 | -1.885436 | 1.388166  |
| H  | 0 | -0.632572 | 1.157664  | 1.538406  |

### TS-8+CH

B3LYP/6-31G(d) Geometry

|   |   |           |           |           |
|---|---|-----------|-----------|-----------|
| C | 0 | -1.491613 | 1.347077  | -0.440436 |
| C | 0 | -2.063362 | 0.727424  | 0.685308  |
| C | 0 | -1.724086 | -0.608740 | 0.957566  |
| C | 0 | -0.763290 | 0.592169  | -1.331892 |
| C | 0 | -1.584267 | -1.562049 | -0.226042 |
| C | 0 | -0.987819 | -0.884504 | -1.492964 |
| H | 0 | -1.494994 | 2.431576  | -0.520988 |
| H | 0 | -2.527445 | 1.337589  | 1.456983  |
| H | 0 | -2.173935 | -1.059003 | 1.842267  |
| H | 0 | -0.166054 | 1.086551  | -2.094526 |
| H | 0 | -2.588755 | -1.940131 | -0.451928 |
| H | 0 | -0.984307 | -2.431576 | 0.060427  |
| H | 0 | -0.057372 | -1.371538 | -1.799873 |
| H | 0 | -1.676920 | -1.012990 | -2.341175 |
| C | 0 | 0.137368  | -0.421589 | 1.628447  |
| C | 0 | 1.086651  | -0.164584 | 0.623461  |
| C | 0 | 1.629140  | 1.163202  | 0.352096  |

|    |   |           |           |           |
|----|---|-----------|-----------|-----------|
| O  | 0 | 2.588755  | 1.431963  | -0.350536 |
| Cl | 0 | 1.935592  | -1.513824 | -0.121069 |
| H  | 0 | 0.172645  | -1.405567 | 2.089542  |
| H  | 0 | -0.018941 | 0.382834  | 2.341175  |
| H  | 0 | 1.069935  | 1.956313  | 0.897420  |

#### TS-9+CH

B3LYP/6-31G(d) Geometry

|   |   |           |           |           |
|---|---|-----------|-----------|-----------|
| C | 0 | -0.963618 | -1.550431 | 0.479840  |
| C | 0 | -1.700955 | -1.144962 | -0.645173 |
| C | 0 | -1.744445 | 0.223528  | -0.948648 |
| C | 0 | -0.433613 | -0.588871 | 1.315598  |
| C | 0 | -1.875679 | 1.208817  | 0.205861  |
| C | 0 | -1.115097 | 0.746153  | 1.482624  |
| H | 0 | -0.660713 | -2.589930 | 0.582645  |
| H | 0 | -1.981300 | -1.878159 | -1.398044 |
| H | 0 | -2.269840 | 0.519320  | -1.856128 |
| H | 0 | 0.292458  | -0.871725 | 2.074051  |
| H | 0 | -2.944233 | 1.304277  | 0.435178  |
| H | 0 | -1.543530 | 2.204264  | -0.109175 |
| H | 0 | -0.398913 | 1.501901  | 1.816860  |
| H | 0 | -1.830009 | 0.638561  | 2.311772  |
| C | 0 | 0.167547  | 0.568088  | -1.563118 |
| C | 0 | 1.105629  | 0.524899  | -0.515338 |
| C | 0 | 1.934602  | -0.670425 | -0.344408 |
| O | 0 | 2.944233  | -0.726251 | 0.346162  |
| C | 0 | 1.587697  | 1.770407  | 0.187220  |
| H | 0 | -0.068288 | 1.546774  | -1.978790 |
| H | 0 | 0.212473  | -0.217870 | -2.311772 |
| H | 0 | 1.594377  | -1.557809 | -0.924616 |
| H | 0 | 0.865737  | 2.589930  | 0.117632  |
| H | 0 | 2.524731  | 2.112716  | -0.273282 |
| H | 0 | 1.821314  | 1.582501  | 1.239351  |

#### TS-10+CH

B3LYP/6-31G(d) Geometry

|   |   |           |           |           |
|---|---|-----------|-----------|-----------|
| C | 0 | -0.260890 | -2.315742 | 0.204373  |
| C | 0 | 0.050357  | -1.418480 | 1.240895  |
| C | 0 | 0.849964  | -0.302592 | 0.940070  |
| C | 0 | 0.215742  | -2.070886 | -1.065002 |
| C | 0 | 1.975983  | -0.541611 | -0.060156 |
| C | 0 | 1.498469  | -1.314492 | -1.314385 |
| H | 0 | -1.043353 | -3.053504 | 0.356345  |
| H | 0 | -0.491431 | -1.476223 | 2.180077  |
| H | 0 | 1.110393  | 0.355807  | 1.768357  |
| H | 0 | -0.184767 | -2.636585 | -1.904179 |
| H | 0 | 2.742662  | -1.132586 | 0.457416  |
| H | 0 | 2.458294  | 0.398241  | -0.344064 |
| H | 0 | 2.270284  | -2.042060 | -1.606672 |
| H | 0 | 1.387467  | -0.651774 | -2.180077 |
| C | 0 | -0.387153 | 0.967425  | -0.022440 |
| C | 0 | -1.014747 | 0.297155  | -1.094398 |
| C | 0 | -2.247999 | -0.412212 | -0.858194 |
| O | 0 | -2.739044 | -0.575769 | 0.261354  |
| C | 0 | 0.496166  | 2.169006  | -0.310120 |
| H | 0 | -1.042650 | 1.092953  | 0.836613  |
| H | 0 | -0.672355 | 0.425634  | -2.117895 |
| H | 0 | -2.742662 | -0.842378 | -1.756293 |
| H | 0 | 1.094434  | 2.034671  | -1.217635 |
| H | 0 | -0.134943 | 3.053504  | -0.463652 |
| H | 0 | 1.176721  | 2.397791  | 0.517621  |

#### TS-11+CH

B3LYP/6-31G(d) Geometry

|   |   |           |           |           |
|---|---|-----------|-----------|-----------|
| C | 0 | 0.492386  | -1.831429 | -0.543040 |
| C | 0 | -0.656900 | -1.639243 | -1.318522 |
| C | 0 | -1.733005 | -0.958915 | -0.753621 |
| C | 0 | 0.508399  | -1.317594 | 0.755513  |
| C | 0 | -2.044342 | -1.141970 | 0.716194  |
| C | 0 | -0.764594 | -1.347179 | 1.577991  |
| H | 0 | 1.416575  | -2.160841 | -1.011628 |
| H | 0 | -0.621286 | -1.813584 | -2.391542 |
| H | 0 | -2.570220 | -0.671060 | -1.385758 |
| H | 0 | 1.442460  | -1.318696 | 1.312463  |
| H | 0 | -2.684732 | -2.030098 | 0.796560  |
| H | 0 | -2.645914 | -0.304994 | 1.082454  |
| H | 0 | -0.711968 | -0.616938 | 2.391542  |
| H | 0 | -0.803517 | -2.332089 | 2.062218  |
| C | 0 | -0.690331 | 1.072013  | -0.554549 |
| C | 0 | 0.418208  | 0.872965  | 0.295918  |
| C | 0 | 1.783681  | 0.914326  | -0.257415 |
| O | 0 | 2.790220  | 1.095470  | 0.401210  |
| C | 0 | -1.838418 | 1.781296  | -0.090957 |
| N | 0 | -2.790220 | 2.332089  | 0.295409  |
| H | 0 | -0.506351 | 1.158940  | -1.622164 |
| H | 0 | 0.336437  | 1.147977  | 1.343610  |
| H | 0 | 1.838957  | 0.753268  | -1.358765 |

#### TS-12+CH

B3LYP/6-31G(d) Geometry

|    |   |           |           |           |
|----|---|-----------|-----------|-----------|
| C  | 0 | -1.719413 | -1.606397 | -0.158169 |
| C  | 0 | -2.592796 | -0.886082 | -1.000492 |
| C  | 0 | -2.813758 | 0.482338  | -0.769212 |
| C  | 0 | -1.210934 | -1.017219 | 0.972238  |
| C  | 0 | -2.821118 | 0.951512  | 0.684081  |
| C  | 0 | -1.789180 | 0.220240  | 1.586197  |
| H  | 0 | -1.355185 | -2.582794 | -0.466363 |
| H  | 0 | -2.913564 | -1.332231 | -1.939393 |
| H  | 0 | -3.565317 | 0.961076  | -1.396241 |
| H  | 0 | -0.405680 | -1.510728 | 1.512837  |
| H  | 0 | -3.833578 | 0.761214  | 1.061605  |
| H  | 0 | -2.672076 | 2.033764  | 0.737767  |
| H  | 0 | -0.972534 | 0.888269  | 1.884222  |
| H  | 0 | -2.264366 | -0.075804 | 2.533409  |
| C  | 0 | -1.224978 | 1.281374  | -1.626270 |
| C  | 0 | -0.072821 | 1.246804  | -0.812064 |
| C  | 0 | 0.841981  | 0.166054  | -0.814080 |
| O  | 0 | 1.862422  | 0.092112  | -0.083609 |
| B  | 0 | 2.665783  | -1.273149 | 0.029215  |
| Cl | 0 | 0.247964  | 2.582794  | 0.277478  |
| H  | 0 | -1.671286 | 2.260350  | -1.782125 |
| H  | 0 | -1.179596 | 0.686763  | -2.533409 |
| H  | 0 | 0.643007  | -0.649219 | -1.518832 |
| H  | 0 | 2.253887  | -1.756714 | 1.073265  |
| H  | 0 | 3.833578  | -0.970982 | 0.086771  |
| H  | 0 | 2.358649  | -1.935553 | -0.948244 |

#### TS-13+CH

B3LYP/6-31G(d) Geometry

|   |   |           |           |           |
|---|---|-----------|-----------|-----------|
| C | 0 | -1.494618 | -1.935985 | -0.217976 |
| C | 0 | -2.421385 | -1.328526 | -1.086283 |
| C | 0 | -2.826790 | -0.005623 | -0.834434 |
| C | 0 | -1.123746 | -1.292209 | 0.938881  |
| C | 0 | -3.019287 | 0.400786  | 0.623624  |
| C | 0 | -1.986508 | -0.247315 | 1.588973  |

|     |           |           |           |
|-----|-----------|-----------|-----------|
| H O | -0.962438 | -2.830081 | -0.532531 |
| H O | -2.619061 | -1.778502 | -2.056527 |
| H O | -3.569028 | 0.412214  | -1.513824 |
| H O | -0.272114 | -1.659351 | 1.507357  |
| H O | -4.030023 | 0.084461  | 0.908719  |
| H O | -3.005926 | 1.491362  | 0.717724  |
| H O | -1.357668 | 0.505917  | 2.073264  |
| H O | -2.517196 | -0.741830 | 2.416568  |
| C O | -1.262593 | 1.025787  | -1.461236 |
| C O | -0.182454 | 1.027993  | -0.545296 |
| C O | 0.853316  | 0.062239  | -0.681697 |
| O O | 1.891356  | 0.075785  | 0.035041  |
| B O | 2.939379  | -1.112980 | -0.006261 |
| C O | -0.002739 | 2.116990  | 0.482425  |
| H O | -1.807036 | 1.964528  | -1.557852 |
| H O | -1.107631 | 0.533542  | -2.416568 |
| H O | 0.770767  | -0.712788 | -1.451588 |
| H O | 2.739909  | -1.714130 | 1.036006  |
| H O | 4.030023  | -0.589542 | -0.037435 |
| H O | 2.672427  | -1.774549 | -0.996187 |
| H O | -0.927307 | 2.677719  | 0.650237  |
| H O | 0.758722  | 2.830081  | 0.138206  |
| H O | 0.362052  | 1.726462  | 1.437154  |

#### TS-14+CH

B3LYP/6-31G(d) Geometry

|     |           |           |           |
|-----|-----------|-----------|-----------|
| C O | 1.146028  | -2.144885 | 0.953118  |
| C O | 2.325662  | -1.468192 | 1.303109  |
| C O | 2.965121  | -0.668372 | 0.337233  |
| C O | 0.731768  | -2.135668 | -0.361545 |
| C O | 2.986500  | -1.181318 | -1.099982 |
| C O | 1.702245  | -1.962876 | -1.497765 |
| H O | 0.484167  | -2.523573 | 1.727804  |
| H O | 2.592879  | -1.364005 | 2.352359  |
| H O | 3.889643  | -0.183869 | 0.647690  |
| H O | -0.275388 | -2.462741 | -0.610513 |
| H O | 3.857292  | -1.841142 | -1.191155 |
| H O | 3.163204  | -0.352936 | -1.794032 |
| H O | 1.196283  | -1.504233 | -2.352359 |
| H O | 1.975721  | -2.974797 | -1.833428 |
| C O | 1.785868  | 0.931206  | 0.298241  |
| C O | 0.637514  | 0.620842  | -0.473519 |
| C O | -0.611821 | 0.265903  | 0.085795  |
| O O | -1.656021 | 0.120886  | -0.606957 |
| B O | -2.975268 | -0.491771 | 0.021705  |
| C O | 2.736874  | 1.994831  | -0.235001 |
| H O | 1.600341  | 1.034012  | 1.366401  |
| H O | 0.669177  | 0.747896  | -1.553464 |
| H O | -0.692985 | 0.130096  | 1.171636  |
| H O | -2.995501 | -1.636615 | -0.402276 |
| H O | -3.889643 | 0.175760  | -0.404620 |
| H O | -2.838770 | -0.439888 | 1.233676  |
| H O | 2.247833  | 2.974797  | -0.187599 |
| H O | 3.004306  | 1.815118  | -1.281821 |
| H O | 3.658219  | 2.054226  | 0.352394  |

#### TS-15+CH

B3LYP/6-31G(d) Geometry

|     |          |           |           |
|-----|----------|-----------|-----------|
| C O | 0.769244 | -1.963405 | 0.677248  |
| C O | 1.919616 | -1.535455 | 1.347544  |
| C O | 2.840192 | -0.733315 | 0.652470  |
| C O | 0.626476 | -1.648133 | -0.668186 |
| C O | 3.103275 | -1.040148 | -0.812568 |

|     |           |           |           |
|-----|-----------|-----------|-----------|
| C O | 1.832518  | -1.530299 | -1.564278 |
| H O | -0.074871 | -2.361061 | 1.235015  |
| H O | 1.977980  | -1.619358 | 2.430175  |
| H O | 3.695020  | -0.344334 | 1.202067  |
| H O | -0.339426 | -1.782289 | -1.149137 |
| H O | 3.869146  | -1.824358 | -0.837959 |
| H O | 3.547096  | -0.169535 | -1.304991 |
| H O | 1.606340  | -0.901120 | -2.430175 |
| H O | 2.010707  | -2.535232 | -1.973505 |
| C O | 1.722988  | 1.035798  | 0.500769  |
| C O | 0.612127  | 0.827079  | -0.359039 |
| C O | -0.707886 | 0.657633  | 0.156865  |
| O O | -1.724025 | 0.674597  | -0.572310 |
| B O | -3.179967 | 0.336274  | -0.002939 |
| C O | 2.787002  | 1.882419  | 0.033827  |
| N O | 3.669755  | 2.535232  | -0.351434 |
| H O | 1.510812  | 1.159344  | 1.559999  |
| H O | 0.703380  | 1.039300  | -1.419073 |
| H O | -0.845058 | 0.495709  | 1.234399  |
| H O | -3.473788 | -0.690696 | -0.581134 |
| H O | -3.869146 | 1.273366  | -0.330405 |
| H O | -3.040055 | 0.202493  | 1.199831  |

#### TS-16+CH

B3LYP/6-31G(d) Geometry

|     |           |           |           |
|-----|-----------|-----------|-----------|
| C O | 0.892683  | -1.412299 | -0.835190 |
| C O | 1.235476  | -1.513963 | 0.532317  |
| C O | 1.245552  | -0.359209 | 1.329333  |
| C O | 0.718002  | -0.182238 | -1.411063 |
| C O | 1.683008  | 0.945553  | 0.662420  |
| C O | 1.188537  | 1.100687  | -0.799891 |
| H O | 0.648716  | -2.311548 | -1.393340 |
| H O | 1.277012  | -2.495739 | 0.998253  |
| H O | 1.611458  | -0.479114 | 2.349195  |
| H O | 0.301889  | -0.121612 | -2.414771 |
| H O | 2.780238  | 0.948812  | 0.678176  |
| H O | 1.366566  | 1.804785  | 1.263155  |
| H O | 2.001529  | 1.492771  | -1.428767 |
| H O | 0.390622  | 1.850556  | -0.879462 |
| C O | -0.636952 | -0.126219 | 1.782165  |
| C O | -1.511015 | 0.090087  | 0.682353  |
| C O | -2.216919 | -1.003728 | 0.108691  |
| C O | -1.783268 | 1.400347  | 0.216292  |
| N O | -2.780238 | -1.930744 | -0.321899 |
| N O | -1.952059 | 2.495739  | -0.153433 |
| H O | -0.459203 | 0.741431  | 2.414771  |
| H O | -0.801254 | -1.040876 | 2.343988  |

#### TS-17+CH

B3LYP/6-31G(d) Geometry

|     |           |           |           |
|-----|-----------|-----------|-----------|
| C O | -0.459817 | 0.700527  | 1.235613  |
| C O | -0.459876 | -0.700676 | 1.235536  |
| C O | -0.789373 | -1.363433 | 0.056849  |
| C O | -0.789307 | 1.363437  | 0.057012  |
| C O | -1.838384 | -0.778683 | -0.866118 |
| C O | -1.838430 | 0.778849  | -0.865929 |
| H O | 0.016349  | 1.240650  | 2.049097  |
| H O | 0.016225  | -1.240930 | 2.048970  |
| H O | -0.647347 | -2.440509 | 0.002171  |
| H O | -0.647211 | 2.440509  | 0.002443  |
| H O | -2.813738 | -1.142118 | -0.517146 |
| H O | -1.722571 | -1.176378 | -1.880446 |
| H O | -2.813740 | 1.142137  | -0.516681 |

|     |           |           |           |
|-----|-----------|-----------|-----------|
| H O | -1.722825 | 1.176795  | -1.880181 |
| C O | 0.989350  | -0.705957 | -1.185936 |
| C O | 0.989332  | 0.705992  | -1.185922 |
| C O | 2.006018  | -1.459477 | -0.518023 |
| C O | 2.006005  | 1.459532  | -0.518039 |
| N O | 2.813735  | 2.103129  | 0.019333  |
| N O | 2.813740  | -2.103060 | 0.019378  |
| H O | 0.556200  | -1.201490 | -2.049097 |
| H O | 0.556135  | 1.201525  | -2.049061 |

#### TS-18+CH

B3LYP/6-31G(d) Geometry

|     |           |           |           |
|-----|-----------|-----------|-----------|
| C O | -0.187508 | -1.459485 | 1.254780  |
| C O | 0.721272  | -1.643979 | 0.204411  |
| C O | 0.368629  | -1.183147 | -1.065209 |
| C O | -1.424831 | -0.894875 | 0.972349  |
| C O | -1.073327 | -1.269891 | -1.527361 |
| C O | -2.090921 | -1.182678 | -0.353631 |
| H O | 0.149429  | -1.559534 | 2.283869  |
| H O | 1.754684  | -1.898771 | 0.421631  |
| H O | 1.122175  | -1.197152 | -1.850135 |
| H O | -2.080876 | -0.606973 | 1.790905  |
| H O | -1.190381 | -2.232292 | -2.041876 |
| H O | -1.277917 | -0.504122 | -2.283869 |
| H O | -2.870845 | -0.444257 | -0.558347 |
| H O | -2.606858 | -2.145881 | -0.242301 |
| C O | 0.379305  | 0.985014  | -0.620850 |
| C O | -0.592368 | 1.225425  | 0.378439  |
| C O | 1.764407  | 1.145191  | -0.291347 |
| C O | -1.849946 | 1.793825  | 0.026607  |
| N O | -2.891382 | 2.232292  | -0.260807 |
| N O | 2.891382  | 1.264662  | -0.024430 |
| H O | 0.124912  | 1.224926  | -1.649339 |
| H O | -0.261167 | 1.420572  | 1.391841  |

#### TS-19+CH

B3LYP/6-31G(d) Geometry

|     |           |           |           |
|-----|-----------|-----------|-----------|
| C O | 0.064146  | -2.307964 | 0.379203  |
| C O | 0.748783  | -1.527049 | 1.322955  |
| C O | 1.505543  | -0.448806 | 0.863133  |
| C O | 0.178840  | -1.978757 | -0.961795 |
| C O | 2.277603  | -0.631922 | -0.432921 |
| C O | 1.457248  | -1.391054 | -1.514260 |
| H O | -0.719281 | -2.986155 | 0.705820  |
| H O | 0.494271  | -1.611379 | 2.377000  |
| H O | 1.973506  | 0.204767  | 1.597943  |
| H O | -0.492904 | -2.442419 | -1.680981 |
| H O | 3.177791  | -1.211109 | -0.189581 |
| H O | 2.635354  | 0.328769  | -0.814433 |
| H O | 1.239532  | -0.751209 | -2.377000 |
| H O | 2.061133  | -2.218949 | -1.911603 |
| C O | -0.046734 | 0.891355  | 0.197093  |
| C O | -0.842455 | 0.203915  | -0.739676 |
| C O | 0.770910  | 2.086191  | -0.251365 |
| C O | -2.125117 | -0.299611 | -0.378545 |
| N O | -3.177791 | -0.702524 | -0.077433 |
| H O | -0.469517 | 0.991057  | 1.192822  |
| H O | -0.697770 | 0.396007  | -1.799563 |
| H O | 1.140964  | 1.966864  | -1.275076 |
| H O | 0.142088  | 2.986155  | -0.236903 |
| H O | 1.627805  | 2.279407  | 0.402900  |

#### TS-20+CH

B3LYP/6-31G(d) Geometry

|     |           |           |           |
|-----|-----------|-----------|-----------|
| C O | 0.566250  | -1.638652 | -0.709676 |
| C O | 1.166001  | -1.625573 | 0.561560  |
| C O | 1.436037  | -0.384439 | 1.149867  |
| C O | 0.374745  | -0.445060 | -1.372593 |
| C O | 1.949092  | 0.736936  | 0.255631  |
| C O | 1.303611  | 0.723349  | -1.160523 |
| H O | 0.082198  | -2.543339 | -1.067437 |
| H O | 1.158598  | -2.527641 | 1.168794  |
| H O | 1.842356  | -0.379928 | 2.160773  |
| H O | -0.250464 | -0.421487 | -2.262556 |
| H O | 3.034285  | 0.606222  | 0.160997  |
| H O | 1.804389  | 1.707343  | 0.744532  |
| H O | 0.788870  | 1.665136  | -1.375072 |
| H O | 2.096634  | 0.652276  | -1.919241 |
| C O | -0.453118 | 0.290227  | 1.581803  |
| C O | -1.254634 | 0.479111  | 0.439560  |
| C O | -2.221316 | -0.522011 | 0.114127  |
| C O | -1.506442 | 1.856102  | -0.145131 |
| N O | -3.034285 | -1.317649 | -0.147206 |
| H O | -0.093401 | 1.190577  | 2.076792  |
| H O | -0.714873 | -0.512190 | 2.262556  |
| H O | -0.695813 | 2.543339  | 0.116142  |
| H O | -1.609936 | 1.839200  | -1.234962 |
| H O | -2.436664 | 2.278572  | 0.258982  |

#### TS-21+CH

B3LYP/6-31G(d) Geometry

|     |           |           |           |
|-----|-----------|-----------|-----------|
| C O | 2.067079  | -0.658903 | -0.540518 |
| C O | 1.051907  | -1.252883 | -1.304778 |
| C O | -0.176936 | -1.500555 | -0.694619 |
| C O | 1.802934  | -0.339456 | 0.785430  |
| C O | -0.168262 | -1.961548 | 0.751546  |
| C O | 0.873512  | -1.196043 | 1.615729  |
| H O | 2.948840  | -0.253359 | -1.030871 |
| H O | 1.146879  | -1.292576 | -2.387685 |
| H O | -1.002246 | -1.857525 | -1.303683 |
| H O | 2.497804  | 0.296131  | 1.329206  |
| H O | 0.089751  | -3.028520 | 0.734384  |
| H O | -1.165285 | -1.896225 | 1.189807  |
| H O | 0.384193  | -0.594068 | 2.387685  |
| H O | 1.498717  | -1.919716 | 2.156719  |
| C O | -0.825863 | 0.604238  | -0.432909 |
| C O | 0.112129  | 1.275016  | 0.361314  |
| C O | 1.091115  | 2.197503  | -0.226295 |
| O O | 1.724701  | 3.028520  | 0.401100  |
| C O | -2.223699 | 0.441524  | 0.094245  |
| F O | -2.948840 | 1.566987  | -0.113103 |
| F O | -2.252784 | 0.197270  | 1.427018  |
| F O | -2.907626 | -0.561616 | -0.508844 |
| H O | -0.827950 | 0.809200  | -1.500122 |
| H O | -0.077922 | 1.412005  | 1.421187  |
| H O | 1.223022  | 2.089968  | -1.327652 |

#### TS-22+CH

B3LYP/6-31G(d) Geometry

|     |          |           |           |
|-----|----------|-----------|-----------|
| C O | 0.447469 | -2.055383 | 0.946246  |
| C O | 1.560480 | -1.308920 | 1.348699  |
| C O | 2.234011 | -0.539315 | 0.388652  |
| C O | 0.108764 | -2.084111 | -0.399604 |
| C O | 2.396914 | -1.113385 | -1.012407 |
| C O | 1.200927 | -2.007902 | -1.445800 |



|     |           |           |           |
|-----|-----------|-----------|-----------|
| H O | -0.240384 | -2.446622 | 1.691232  |
| H O | 1.740138  | -1.134641 | 2.407259  |
| H O | 3.074678  | 0.062346  | 0.730936  |
| H O | -0.812554 | -2.572598 | -0.706494 |
| H O | 3.317179  | -1.711413 | -1.016094 |
| H O | 2.561787  | -0.306859 | -1.734591 |
| H O | 0.790827  | -1.684903 | -2.407259 |
| H O | 1.558099  | -3.036589 | -1.604183 |
| C O | 0.883811  | 1.016859  | 0.064612  |
| C O | -0.137443 | 0.462908  | -0.730307 |
| B O | -1.508881 | -0.061347 | -0.284549 |
| C O | -2.018480 | 0.045088  | 1.222925  |
| C O | -2.576757 | -0.486987 | -1.393227 |
| C O | 1.811580  | 2.075539  | -0.511067 |
| H O | 0.637702  | 1.192792  | 1.110450  |
| H O | 0.075149  | 0.477781  | -1.804344 |
| H O | -2.688532 | 0.916592  | 1.299470  |
| H O | -2.625654 | -0.819062 | 1.524745  |
| H O | -1.234505 | 0.183914  | 1.976269  |
| H O | -3.317179 | 0.320332  | -1.509175 |
| H O | -2.150221 | -0.667992 | -2.388522 |
| H O | -3.158240 | -1.374464 | -1.106451 |
| H O | 1.284270  | 3.036589  | -0.565225 |
| H O | 2.132233  | 1.827780  | -1.529269 |
| H O | 2.704566  | 2.229866  | 0.104593  |

#### TS-23+CH

B3LYP/6-31G(d) Geometry

|      |           |           |           |
|------|-----------|-----------|-----------|
| C O  | 0.255482  | -1.330623 | 1.326408  |
| C O  | 1.260402  | -0.357220 | 1.421614  |
| C O  | 1.876664  | 0.099356  | 0.246341  |
| C O  | -0.027291 | -1.882826 | 0.092212  |
| C O  | 2.138446  | -0.912468 | -0.862888 |
| C O  | 1.041355  | -2.009729 | -0.965750 |
| H O  | -0.409620 | -1.503951 | 2.167197  |
| H O  | 1.381929  | 0.199332  | 2.347886  |
| H O  | 2.653949  | 0.853344  | 0.359196  |
| H O  | -0.905066 | -2.512888 | -0.026687 |
| H O  | 3.104997  | -1.384286 | -0.647008 |
| H O  | 2.264473  | -0.400093 | -1.822250 |
| H O  | 0.588587  | -2.034442 | -1.961273 |
| H O  | 1.502437  | -2.999625 | -0.829254 |
| C O  | 0.430638  | 1.308866  | -0.542581 |
| C O  | -0.559584 | 0.463906  | -1.091675 |
| B O  | -1.888285 | 0.120713  | -0.476808 |
| Cl O | -2.424924 | 0.785080  | 1.103221  |
| Cl O | -3.104997 | -0.836552 | -1.389276 |
| C O  | 1.267654  | 2.172612  | -1.474800 |
| H O  | 0.149175  | 1.823525  | 0.374031  |
| H O  | -0.377166 | 0.111185  | -2.107571 |
| H O  | 0.651474  | 2.999625  | -1.848305 |
| H O  | 1.620540  | 1.613158  | -2.347886 |
| H O  | 2.134437  | 2.611950  | -0.970263 |

#### TS-24+CH

B3LYP/6-31G(d) Geometry

|     |           |          |           |
|-----|-----------|----------|-----------|
| C O | 1.036808  | 1.302740 | 0.314111  |
| C O | 0.036956  | 1.165152 | 1.292865  |
| C O | -1.234861 | 0.776053 | 0.900349  |
| C O | 0.729581  | 0.974340 | -1.002173 |
| C O | -1.761916 | 1.190135 | -0.452960 |
| C O | -0.660404 | 1.217193 | -1.550606 |
| H O | 2.072211  | 1.419228 | 0.620061  |

|     |           |           |           |
|-----|-----------|-----------|-----------|
| H O | 0.315069  | 1.153906  | 2.343340  |
| H O | -1.970912 | 0.504110  | 1.653296  |
| H O | 1.534265  | 0.917045  | -1.731961 |
| H O | -2.181661 | 2.197077  | -0.323426 |
| H O | -2.599425 | 0.557948  | -0.759323 |
| H O | -0.888176 | 0.499354  | -2.343340 |
| H O | -0.645143 | 2.204273  | -2.030723 |
| C O | -0.562683 | -1.409389 | 0.278261  |
| C O | 0.455819  | -1.240212 | -0.651588 |
| N O | 1.813750  | -1.493137 | -0.204863 |
| O O | 2.039816  | -1.486058 | 1.009879  |
| O O | 2.662704  | -1.671360 | -1.080778 |
| N O | -1.870194 | -1.820167 | -0.179152 |
| O O | -2.662704 | -2.204273 | 0.684230  |
| O O | -2.132279 | -1.741491 | -1.386765 |
| H O | -0.366223 | -1.686633 | 1.301186  |
| H O | 0.313322  | -1.433405 | -1.704462 |

#### TS-25+CH

B3LYP/6-31G(d) Geometry

|     |           |           |           |
|-----|-----------|-----------|-----------|
| C O | 0.050309  | -1.660357 | 1.224886  |
| C O | 0.783357  | -0.466185 | 1.278921  |
| C O | 1.459318  | -0.047539 | 0.144353  |
| C O | 0.005852  | -2.360075 | 0.011539  |
| C O | 2.040739  | -1.045960 | -0.828187 |
| C O | 1.260508  | -2.391582 | -0.845313 |
| H O | -0.652760 | -1.900025 | 2.017643  |
| H O | 0.636954  | 0.217397  | 2.110445  |
| H O | 1.867157  | 0.959918  | 0.104959  |
| H O | -0.627700 | -3.240981 | -0.056481 |
| H O | 3.079041  | -1.231040 | -0.518390 |
| H O | 2.110436  | -0.607605 | -1.829029 |
| H O | 1.899413  | -3.187244 | -0.442095 |
| H O | 1.015803  | -2.692096 | -1.869314 |
| C O | -0.564231 | 0.184563  | -1.239140 |
| C O | -1.186290 | -1.081278 | -1.140819 |
| C O | -0.913550 | 1.392647  | -0.514169 |
| C O | -2.521116 | -1.463587 | -0.529317 |
| O O | -3.079041 | -2.466264 | -0.930136 |
| O O | -3.026876 | -0.740717 | 0.471528  |
| O O | -1.650329 | 1.496157  | 0.471591  |
| O O | -0.308563 | 2.496041  | -1.019535 |
| H O | 0.055554  | 0.361584  | -2.110445 |
| H O | -1.037095 | -1.704654 | -2.017945 |
| H O | -2.514733 | 0.100915  | 0.609953  |
| H O | -0.612339 | 3.240981  | -0.468554 |

#### TS-26+CH

B3LYP/6-31G(d) Geometry

|     |           |           |           |
|-----|-----------|-----------|-----------|
| C O | -0.527471 | -1.112543 | 1.388783  |
| C O | 0.019694  | -1.987043 | 0.435993  |
| C O | -0.265394 | -1.767548 | -0.926975 |
| C O | -1.443721 | -0.162514 | 0.994001  |
| C O | -1.665667 | -1.278519 | -1.285903 |
| C O | -2.265544 | -0.287574 | -0.251067 |
| H O | -0.117470 | -1.087087 | 2.394159  |
| H O | 0.828965  | -2.654350 | 0.718869  |
| H O | 0.155944  | -2.480853 | -1.634307 |
| H O | -1.715900 | 0.631667  | 1.686017  |
| H O | -2.298242 | -2.171886 | -1.350749 |
| H O | -1.667814 | -0.833610 | -2.286758 |
| H O | -3.265913 | -0.626504 | 0.056832  |
| H O | -2.426095 | 0.704695  | -0.688178 |

|   |   |           |           |           |
|---|---|-----------|-----------|-----------|
| C | 0 | 0.904921  | -0.230365 | -1.356196 |
| C | 0 | 0.605482  | 0.954137  | -0.601262 |
| C | 0 | 2.223817  | -0.808357 | -1.227639 |
| C | 0 | 1.367329  | 1.321331  | 0.544800  |
| C | 0 | -0.290485 | 1.910512  | -1.145019 |
| N | 0 | 1.997156  | 1.613211  | 1.481395  |
| N | 0 | -1.061931 | 2.654350  | -1.608278 |
| N | 0 | 3.265913  | -1.315220 | -1.142103 |
| H | 0 | 0.576864  | -0.182039 | -2.394159 |

#### TS-27+CH

B3LYP/6-31G(d) Geometry

|   |   |           |           |           |
|---|---|-----------|-----------|-----------|
| C | 0 | 0.642413  | -0.035494 | 1.466188  |
| C | 0 | 1.021816  | 1.095841  | 0.725532  |
| C | 0 | 1.221437  | 0.940709  | -0.652552 |
| C | 0 | 0.626370  | -1.265637 | 0.839084  |
| C | 0 | 1.920051  | -0.318797 | -1.145384 |
| C | 0 | 1.597834  | -1.566731 | -0.274310 |
| H | 0 | 0.183260  | 0.086078  | 2.443734  |
| H | 0 | 0.890996  | 2.087420  | 1.151089  |
| H | 0 | 1.442590  | 1.834727  | -1.235077 |
| H | 0 | 0.163024  | -2.114689 | 1.336541  |
| H | 0 | 3.000124  | -0.128258 | -1.120168 |
| H | 0 | 1.672831  | -0.498545 | -2.198489 |
| H | 0 | 1.237738  | -2.398381 | -0.887270 |
| H | 0 | 2.523389  | -1.932293 | 0.193783  |
| C | 0 | -0.707589 | 0.616828  | -1.323342 |
| C | 0 | -1.200419 | -0.620377 | -0.840350 |
| C | 0 | -2.179395 | -0.618535 | 0.202322  |
| C | 0 | -1.195243 | -1.866719 | -1.708820 |
| N | 0 | -3.000124 | -0.637427 | 1.032120  |
| C | 0 | -1.408164 | 1.913779  | -0.965695 |
| H | 0 | -0.360118 | 0.569033  | -2.356336 |
| H | 0 | -0.385570 | -1.827791 | -2.443734 |
| H | 0 | -1.090122 | -2.786369 | -1.124265 |
| H | 0 | -2.139079 | -1.947314 | -2.265865 |
| H | 0 | -0.808184 | 2.786369  | -1.244714 |
| H | 0 | -2.368190 | 1.983041  | -1.494078 |
| H | 0 | -1.624868 | 1.969596  | 0.104609  |

#### TS-28+CH

B3LYP/6-31G(d) Geometry

|   |   |           |           |           |
|---|---|-----------|-----------|-----------|
| C | 0 | -0.495466 | -2.069434 | -0.328268 |
| C | 0 | -1.107020 | -1.244440 | -1.282502 |
| C | 0 | -1.403782 | 0.075103  | -0.918714 |
| C | 0 | -0.290235 | -1.570946 | 0.946597  |
| C | 0 | -1.936362 | 0.320076  | 0.485064  |
| C | 0 | -1.259454 | -0.587281 | 1.552185  |
| H | 0 | 0.001613  | -2.982854 | -0.642593 |
| H | 0 | -1.097625 | -1.534310 | -2.330716 |
| H | 0 | -1.815489 | 0.731826  | -1.684109 |
| H | 0 | 0.349090  | -2.118501 | 1.635761  |
| H | 0 | -3.013497 | 0.111952  | 0.462488  |
| H | 0 | -1.845076 | 1.377573  | 0.752044  |
| H | 0 | -0.768260 | 0.004917  | 2.330716  |
| H | 0 | -2.031208 | -1.167962 | 2.077904  |
| C | 0 | 0.519091  | 0.913714  | -0.806454 |
| C | 0 | 1.278078  | 0.252958  | 0.196561  |
| C | 0 | 0.200537  | 2.392506  | -0.683235 |
| C | 0 | 2.219733  | -0.730253 | -0.242067 |
| C | 0 | 1.606095  | 0.894537  | 1.532659  |
| N | 0 | 3.013497  | -1.510073 | -0.594525 |
| H | 0 | 0.768658  | 0.624062  | -1.822616 |

|   |   |           |          |           |
|---|---|-----------|----------|-----------|
| H | 0 | -0.207846 | 2.666649 | 0.293701  |
| H | 0 | 1.115916  | 2.982854 | -0.825374 |
| H | 0 | -0.516111 | 2.710871 | -1.447047 |
| H | 0 | 0.765982  | 1.472688 | 1.925835  |
| H | 0 | 1.884520  | 0.146141 | 2.280666  |
| H | 0 | 2.455053  | 1.586311 | 1.433318  |

#### TS-29+CH

B3LYP/6-31G(d) Geometry

|   |   |           |           |           |
|---|---|-----------|-----------|-----------|
| C | 0 | -0.600432 | -1.253189 | 1.353985  |
| C | 0 | 0.253540  | -1.898513 | 0.451022  |
| C | 0 | 0.043428  | -1.691270 | -0.915813 |
| C | 0 | -1.635841 | -0.475853 | 0.849640  |
| C | 0 | -1.377187 | -1.579827 | -1.436851 |
| C | 0 | -2.335115 | -0.888804 | -0.424261 |
| H | 0 | -0.328998 | -1.192608 | 2.404954  |
| H | 0 | 1.184985  | -2.336034 | 0.799555  |
| H | 0 | 0.777160  | -2.083179 | -1.617304 |
| H | 0 | -2.204424 | 0.159550  | 1.525217  |
| H | 0 | -1.726639 | -2.601120 | -1.635356 |
| H | 0 | -1.390311 | -1.067214 | -2.404954 |
| H | 0 | -2.845642 | -0.032605 | -0.873884 |
| H | 0 | -3.128411 | -1.591095 | -0.134694 |
| C | 0 | 0.561671  | 0.422514  | -1.053527 |
| C | 0 | -0.205700 | 1.175065  | -0.119378 |
| C | 0 | 1.978517  | 0.305489  | -0.864595 |
| C | 0 | -1.305315 | 1.923065  | -0.644562 |
| N | 0 | -2.213982 | 2.527058  | -1.056404 |
| N | 0 | 3.128411  | 0.198522  | -0.715660 |
| C | 0 | 0.440044  | 1.735401  | 1.136325  |
| H | 0 | 0.259060  | 0.463372  | -2.096142 |
| H | 0 | 1.068296  | 2.601120  | 0.890241  |
| H | 0 | -0.311811 | 2.057749  | 1.861193  |
| H | 0 | 1.082974  | 0.984594  | 1.602769  |

#### TS-30+CH

B3LYP/6-31G(d) Geometry

|   |   |           |           |           |
|---|---|-----------|-----------|-----------|
| C | 0 | 0.408633  | 0.305924  | 1.509906  |
| C | 0 | 0.430287  | 1.584238  | 0.940888  |
| C | 0 | 0.738446  | 1.693935  | -0.418237 |
| C | 0 | 0.758869  | -0.778836 | 0.713487  |
| C | 0 | 1.788962  | 0.782177  | -1.022342 |
| C | 0 | 1.838958  | -0.610057 | -0.329873 |
| H | 0 | -0.084897 | 0.147592  | 2.464566  |
| H | 0 | -0.034604 | 2.416646  | 1.461199  |
| H | 0 | 0.616633  | 2.661329  | -0.901317 |
| H | 0 | 0.594576  | -1.785971 | 1.090004  |
| H | 0 | 2.759630  | 1.281382  | -0.908733 |
| H | 0 | 1.632280  | 0.684894  | -2.102742 |
| H | 0 | 1.803591  | -1.421285 | -1.062316 |
| H | 0 | 2.801175  | -0.725186 | 0.187408  |
| C | 0 | -1.022229 | 0.686303  | -1.244818 |
| C | 0 | -1.067549 | -0.655010 | -0.776440 |
| C | 0 | -2.011110 | 1.647878  | -0.853334 |
| C | 0 | -2.031234 | -1.013381 | 0.226402  |
| N | 0 | -2.801175 | -1.361120 | 1.028164  |
| N | 0 | -2.795178 | 2.454746  | -0.554797 |
| C | 0 | -0.707780 | -1.785391 | -1.729806 |
| H | 0 | -0.662940 | 0.822042  | -2.262425 |
| H | 0 | 0.033283  | -1.458003 | -2.464566 |
| H | 0 | -0.316540 | -2.661329 | -1.203911 |
| H | 0 | -1.601080 | -2.106652 | -2.280342 |



### TS-31+CH

B3LYP/6-31G(d) Geometry

|   |   |           |           |           |
|---|---|-----------|-----------|-----------|
| C | 0 | 0.634224  | -1.901425 | 0.598452  |
| C | 0 | 0.587278  | -0.715160 | 1.341676  |
| C | 0 | 0.834198  | 0.494755  | 0.676596  |
| C | 0 | 0.955947  | -1.827813 | -0.747333 |
| C | 0 | 1.942578  | 0.486611  | -0.366834 |
| C | 0 | 1.912098  | -0.779654 | -1.266152 |
| H | 0 | 0.204442  | -2.811479 | 1.006707  |
| H | 0 | 0.142863  | -0.720099 | 2.333247  |
| H | 0 | 0.759147  | 1.413701  | 1.256276  |
| H | 0 | 0.814806  | -2.704502 | -1.376273 |
| H | 0 | 2.893075  | 0.514535  | 0.181384  |
| H | 0 | 1.920428  | 1.397546  | -0.971058 |
| H | 0 | 2.915119  | -1.229871 | -1.293462 |
| H | 0 | 1.678006  | -0.530856 | -2.306942 |
| C | 0 | -0.916846 | 0.750097  | -0.460309 |
| C | 0 | -0.971182 | -0.368389 | -1.335343 |
| C | 0 | -1.949360 | 0.887759  | 0.653700  |
| C | 0 | -1.826674 | -1.536920 | -1.194818 |
| O | 0 | -2.480335 | -1.871584 | -0.211505 |
| C | 0 | -0.608570 | 2.089587  | -1.124621 |
| H | 0 | -0.557444 | -0.239804 | -2.333247 |
| H | 0 | -1.657694 | 1.674895  | 1.359067  |
| H | 0 | -2.915119 | 1.179947  | 0.218427  |
| H | 0 | -2.106498 | -0.049109 | 1.183505  |
| H | 0 | -1.852938 | -2.169582 | -2.113087 |
| H | 0 | 0.065740  | 1.991456  | -1.980780 |
| H | 0 | -1.544917 | 2.527357  | -1.496211 |
| H | 0 | -0.176752 | 2.811479  | -0.421728 |

### TS-32+CH

B3LYP/6-31G(d) Geometry

|   |   |           |           |           |
|---|---|-----------|-----------|-----------|
| C | 0 | -0.202600 | -1.438183 | 0.736566  |
| C | 0 | 0.782287  | -0.675341 | 1.380597  |
| C | 0 | 1.787466  | -0.094780 | 0.633631  |
| C | 0 | -0.206212 | -1.480651 | -0.675516 |
| C | 0 | 2.224035  | -0.631728 | -0.695872 |
| C | 0 | 1.155836  | -1.539513 | -1.363050 |
| H | 0 | -1.066343 | -1.789569 | 1.295789  |
| H | 0 | 0.660942  | -0.409257 | 2.426672  |
| H | 0 | 2.424577  | 0.657293  | 1.094000  |
| H | 0 | -0.977743 | -2.084040 | -1.151216 |
| H | 0 | 3.146458  | -1.206250 | -0.525272 |
| H | 0 | 2.523356  | 0.195789  | -1.349019 |
| H | 0 | 1.056436  | -1.300720 | -2.426672 |
| H | 0 | 1.479070  | -2.586482 | -1.313302 |
| C | 0 | -0.131886 | 1.376427  | -0.680787 |
| C | 0 | -0.904018 | 0.279312  | -1.189563 |
| C | 0 | -2.333004 | 0.127306  | -0.756266 |
| O | 0 | -3.146458 | -0.499422 | -1.401216 |
| C | 0 | 0.832202  | 2.005692  | -1.512835 |
| C | 0 | -0.513066 | 2.053628  | 0.516231  |
| N | 0 | 1.642916  | 2.468334  | -2.213730 |
| N | 0 | -0.849233 | 2.586482  | 1.497866  |
| H | 0 | -0.784172 | 0.100556  | -2.257010 |
| H | 0 | -2.600753 | 0.607626  | 0.206101  |

### TS-33+CH

B3LYP/6-31G(d) Geometry

|   |   |           |           |           |
|---|---|-----------|-----------|-----------|
| C | 0 | 0.040198  | -0.695715 | -1.962385 |
| C | 0 | 0.040212  | 0.695636  | -1.962427 |
| C | 0 | -0.685255 | 1.357667  | -0.959366 |

|   |   |           |           |           |
|---|---|-----------|-----------|-----------|
| C | 0 | -0.685289 | -1.357671 | -0.959289 |
| C | 0 | -1.996223 | 0.777086  | -0.487148 |
| C | 0 | -1.996253 | -0.777031 | -0.487129 |
| H | 0 | 0.752533  | -1.241745 | -2.573789 |
| H | 0 | 0.752556  | 1.241615  | -2.573866 |
| H | 0 | -0.563422 | 2.432598  | -0.848601 |
| H | 0 | -0.563485 | -2.432598 | -0.848463 |
| H | 0 | -2.764829 | 1.151349  | -1.176160 |
| H | 0 | -2.257444 | 1.179018  | 0.495944  |
| H | 0 | -2.764845 | -1.151281 | -1.176163 |
| H | 0 | -2.257526 | -1.178928 | 0.495963  |
| C | 0 | 0.625515  | 0.728822  | 0.772218  |
| C | 0 | 0.625478  | -0.728769 | 0.772264  |
| C | 0 | -0.121344 | 1.413676  | 1.789402  |
| C | 0 | 1.818976  | 1.413792  | 0.349467  |
| C | 0 | 1.818909  | -1.413828 | 0.349574  |
| C | 0 | -0.121425 | -1.413517 | 1.789488  |
| N | 0 | 2.764753  | -1.986991 | -0.010176 |
| N | 0 | -0.761971 | -1.986811 | 2.573866  |
| N | 0 | 2.764845  | 1.986882  | -0.010332 |
| N | 0 | -0.761853 | 1.987053  | 2.573749  |

### TS-34+CH

B3LYP/6-31G(d) Geometry

|   |   |           |           |           |
|---|---|-----------|-----------|-----------|
| C | 0 | -0.638388 | -1.210827 | 1.814640  |
| C | 0 | 0.016760  | -2.044998 | 0.902337  |
| C | 0 | -0.174166 | -1.812488 | -0.479421 |
| C | 0 | -1.529378 | -0.263446 | 1.342746  |
| C | 0 | -1.588564 | -1.434952 | -0.907612 |
| C | 0 | -2.270084 | -0.423651 | 0.051078  |
| H | 0 | -0.315864 | -1.184365 | 2.851248  |
| H | 0 | 0.829326  | -2.681489 | 1.240398  |
| H | 0 | 0.334962  | -2.494849 | -1.158414 |
| H | 0 | -1.863071 | 0.529469  | 2.008725  |
| H | 0 | -2.161035 | -2.370510 | -0.921849 |
| H | 0 | -1.600488 | -1.062255 | -1.935020 |
| H | 0 | -2.413284 | 0.556697  | -0.417728 |
| H | 0 | -3.284458 | -0.769753 | 0.298952  |
| C | 0 | 0.955118  | -0.195293 | -0.815840 |
| C | 0 | 0.510619  | 0.916249  | 0.005517  |
| C | 0 | 2.252992  | -0.743866 | -0.458019 |
| C | 0 | 1.162001  | 1.237655  | 1.232124  |
| C | 0 | -0.340558 | 1.908155  | -0.548386 |
| N | 0 | 1.697835  | 1.497041  | 2.234598  |
| N | 0 | -1.079412 | 2.681489  | -1.016983 |
| N | 0 | 3.284458  | -1.226433 | -0.226274 |
| C | 0 | 0.830141  | -0.025672 | -2.335703 |
| H | 0 | -0.131031 | 0.413116  | -2.608753 |
| H | 0 | 1.616545  | 0.651017  | -2.686319 |
| H | 0 | 0.951209  | -0.981662 | -2.851248 |

### TS-35+CH

B3LYP/6-31G(d) Geometry

|   |   |           |           |           |
|---|---|-----------|-----------|-----------|
| C | 0 | 0.093774  | -1.314495 | 1.248598  |
| C | 0 | 1.224865  | -0.604189 | 1.651958  |
| C | 0 | 2.046663  | -0.049830 | 0.677473  |
| C | 0 | -0.193017 | -1.380040 | -0.136993 |
| C | 0 | 2.215445  | -0.690513 | -0.670812 |
| C | 0 | 1.012759  | -1.595518 | -1.045456 |
| H | 0 | -0.650491 | -1.615381 | 1.981557  |
| H | 0 | 1.346291  | -0.319130 | 2.692814  |
| H | 0 | 2.787792  | 0.692248  | 0.965844  |
| H | 0 | -1.089642 | -1.922019 | -0.432698 |

|     |           |           |           |
|-----|-----------|-----------|-----------|
| H O | 3.133971  | -1.293508 | -0.631327 |
| H O | 2.409478  | 0.076910  | -1.427843 |
| H O | 0.739480  | -1.470325 | -2.095406 |
| H O | 1.294706  | -2.649267 | -0.928563 |
| C O | 0.177606  | 1.450243  | -0.171951 |
| C O | -0.817093 | 0.488295  | -0.606285 |
| C O | -2.072570 | 0.405889  | 0.223890  |
| O O | -3.133971 | 0.024117  | -0.220980 |
| C O | 0.997199  | 2.109984  | -1.133403 |
| C O | 0.055852  | 2.116664  | 1.089375  |
| C O | -1.091586 | 0.387692  | -2.099602 |
| N O | 1.691603  | 2.599405  | -1.932932 |
| N O | -0.052363 | 2.649267  | 2.120729  |
| H O | -1.964171 | 0.691751  | 1.288298  |
| H O | -0.176676 | 0.424326  | -2.692814 |
| H O | -1.717773 | 1.234051  | -2.403513 |
| H O | -1.647451 | -0.522280 | -2.335205 |

### TS-36+CH

B3LYP/6-31G(d) Geometry

|     |           |           |           |
|-----|-----------|-----------|-----------|
| C O | -0.996511 | -1.629252 | -1.381496 |
| C O | -1.712028 | -0.427110 | -1.374463 |
| C O | -1.683296 | 0.345936  | -0.198095 |
| C O | -0.429491 | -2.071676 | -0.195134 |
| C O | -1.826573 | -0.400168 | 1.122937  |
| C O | -1.121496 | -1.785834 | 1.113114  |
| H O | -0.736481 | -2.105422 | -2.324387 |
| H O | -2.037850 | 0.014020  | -2.312767 |
| H O | -2.193982 | 1.308223  | -0.224604 |
| H O | 0.284189  | -2.891525 | -0.209264 |
| H O | -2.899834 | -0.541686 | 1.300606  |
| H O | -1.468938 | 0.215183  | 1.953891  |
| H O | -0.423283 | -1.888453 | 1.948232  |
| H O | -1.870230 | -2.578266 | 1.258974  |
| C O | 0.271391  | 1.036691  | -0.172150 |
| C O | 1.112698  | -0.063979 | 0.199582  |
| C O | 1.942332  | -0.778141 | -0.781651 |
| O O | 2.899834  | -1.488415 | -0.490870 |
| C O | 0.126706  | 2.164654  | 0.848639  |
| C O | 0.401323  | 1.613855  | -1.582557 |
| C O | 1.578077  | -0.248540 | 1.627312  |
| H O | 1.672824  | -0.635860 | -1.845660 |
| H O | 1.080149  | 2.703020  | 0.941711  |
| H O | -0.143974 | 1.821097  | 1.849163  |
| H O | -0.625745 | 2.891525  | 0.524614  |
| H O | 0.354965  | 0.857743  | -2.366895 |
| H O | 1.360195  | 2.140521  | -1.685875 |
| H O | -0.395780 | 2.341600  | -1.773236 |
| H O | 0.784232  | -0.117930 | 2.366895  |
| H O | 2.360901  | 0.486420  | 1.867497  |
| H O | 2.029625  | -1.235192 | 1.750617  |

### TS-37+CH

B3LYP/6-31G(d) Geometry

|     |           |           |           |
|-----|-----------|-----------|-----------|
| C O | -0.794157 | 1.188269  | 1.239667  |
| C O | -1.965118 | 0.610574  | 1.710743  |
| C O | -2.912974 | 0.180827  | 0.762735  |
| C O | -0.644283 | 1.338099  | -0.154220 |
| C O | -3.153795 | 1.017167  | -0.472571 |
| C O | -1.866216 | 1.742893  | -0.949724 |
| H O | 0.055461  | 1.335917  | 1.901699  |
| H O | -2.041917 | 0.290419  | 2.745379  |
| H O | -3.751023 | -0.423761 | 1.102019  |

|     |           |           |           |
|-----|-----------|-----------|-----------|
| H O | 0.317612  | 1.664377  | -0.542911 |
| H O | -3.920551 | 1.757081  | -0.209470 |
| H O | -3.595476 | 0.404562  | -1.264396 |
| H O | -1.701451 | 1.605724  | -2.020655 |
| H O | -1.973735 | 2.825937  | -0.802712 |
| C O | -1.698844 | -1.437932 | -0.170927 |
| C O | -0.555659 | -0.802935 | -0.806898 |
| C O | 0.737219  | -0.903714 | -0.144084 |
| O O | 1.794297  | -0.669014 | -0.755198 |
| C O | -2.735833 | -1.957156 | -1.022236 |
| C O | -1.497514 | -2.217291 | 1.026525  |
| C O | -0.511155 | -0.686442 | -2.316701 |
| N O | -3.599030 | -2.327614 | -1.709470 |
| N O | -1.336542 | -2.825937 | 2.004690  |
| H O | 0.790071  | -1.158182 | 0.920247  |
| H O | -1.494281 | -0.485824 | -2.745379 |
| H O | -0.155365 | -1.633242 | -2.741468 |
| H O | 0.191049  | 0.088607  | -2.630912 |
| B O | 3.227845  | -0.590871 | -0.013232 |
| H O | 3.543300  | 0.568155  | -0.177578 |
| H O | 3.920551  | -1.365843 | -0.626064 |
| H O | 3.004560  | -0.893686 | 1.141668  |

### TS-38+CH

B3LYP/6-31G(d) Geometry

|     |           |           |           |
|-----|-----------|-----------|-----------|
| C O | -0.728198 | -1.558802 | 1.561888  |
| C O | 0.218401  | -2.089379 | 0.680877  |
| C O | 0.133897  | -1.729429 | -0.667567 |
| C O | -1.682643 | -0.678602 | 1.050142  |
| C O | -1.241127 | -1.593415 | -1.286707 |
| C O | -2.261765 | -0.920737 | -0.326301 |
| H O | -0.576863 | -1.642101 | 2.634993  |
| H O | 1.113281  | -2.570206 | 1.065981  |
| H O | 0.938728  | -2.026492 | -1.336652 |
| H O | -2.317820 | -0.127316 | 1.740439  |
| H O | -1.577963 | -2.610582 | -1.527095 |
| H O | -1.189671 | -1.067724 | -2.243878 |
| H O | -2.656042 | 0.012506  | -0.739608 |
| H O | -3.131322 | -1.578671 | -0.198885 |
| C O | 0.655411  | 0.456367  | -0.500560 |
| C O | -0.210711 | 1.005547  | 0.505203  |
| C O | 0.531683  | 0.890705  | -1.957282 |
| C O | 2.018539  | 0.210524  | -0.105396 |
| C O | -1.240255 | 1.897407  | 0.060138  |
| N O | -2.098266 | 2.610582  | -0.278642 |
| N O | 3.131322  | 0.014581  | 0.177497  |
| C O | 0.333561  | 1.319054  | 1.892519  |
| H O | -0.511179 | 1.048041  | -2.239178 |
| H O | 1.057068  | 1.842265  | -2.105824 |
| H O | 0.978349  | 0.157600  | -2.634993 |
| H O | 0.985991  | 2.200770  | 1.857164  |
| H O | -0.475750 | 1.522870  | 2.598793  |
| H O | 0.929541  | 0.484446  | 2.268424  |

### TS-39+CH

B3LYP/6-31G(d) Geometry

|     |           |           |           |
|-----|-----------|-----------|-----------|
| C O | -0.439893 | -0.698253 | -1.734964 |
| C O | -0.440092 | 0.698156  | -1.735008 |
| C O | -0.730394 | 1.355488  | -0.536898 |
| C O | -0.729931 | -1.355556 | -0.536756 |
| C O | -1.791511 | 0.777743  | 0.373713  |
| C O | -1.791310 | -0.778053 | 0.373722  |
| H O | 0.014371  | -1.239762 | -2.559462 |

|     |           |           |           |
|-----|-----------|-----------|-----------|
| H O | 0.014012  | 1.239742  | -2.559545 |
| H O | -0.584404 | 2.432301  | -0.483298 |
| H O | -0.583739 | -2.432340 | -0.483127 |
| H O | -2.760380 | 1.142379  | 0.007603  |
| H O | -1.695806 | 1.178488  | 1.387070  |
| H O | -1.695635 | -1.178756 | 1.387103  |
| H O | -2.760033 | -1.142944 | 0.007487  |
| C O | 1.113408  | 0.718062  | 0.638134  |
| C O | 1.113476  | -0.717902 | 0.638055  |
| C O | 2.028880  | 1.392159  | -0.245845 |
| C O | 2.029125  | -1.391782 | -0.245938 |
| N O | 2.760380  | -1.992760 | -0.924241 |
| N O | 2.760041  | 1.993290  | -0.924120 |
| C O | 0.896221  | 1.486596  | 1.936268  |
| C O | 0.896590  | -1.486515 | 1.936211  |
| H O | 0.069532  | 1.084846  | 2.525239  |
| H O | 0.693327  | 2.542130  | 1.735809  |
| H O | 1.798798  | 1.436735  | 2.559545  |
| H O | 0.069746  | -1.085079 | 2.525185  |
| H O | 0.694100  | -2.542130 | 1.735771  |
| H O | 1.799150  | -1.436283 | 2.559476  |

#### TS-40+CH

B3LYP/6-31G(d) Geometry

|     |           |           |           |
|-----|-----------|-----------|-----------|
| C O | -0.671982 | -1.828930 | -1.039034 |
| C O | -1.001169 | -0.578560 | -1.576250 |
| C O | -1.126418 | 0.501714  | -0.691307 |
| C O | -0.601619 | -1.955162 | 0.340777  |
| C O | -1.835593 | 0.251710  | 0.630745  |
| C O | -1.545301 | -1.162226 | 1.210206  |
| H O | -0.274484 | -2.610013 | -1.681613 |
| H O | -0.893892 | -0.404455 | -2.643755 |
| H O | -1.295794 | 1.489593  | -1.118197 |
| H O | -0.168343 | -2.854834 | 0.771937  |
| H O | -2.912420 | 0.351278  | 0.444892  |
| H O | -1.589997 | 1.033577  | 1.355450  |
| H O | -1.173356 | -1.107396 | 2.237579  |
| H O | -2.484190 | -1.730827 | 1.273087  |
| C O | 0.901894  | 0.776119  | -0.091735 |
| C O | 1.273251  | -0.380526 | 0.665338  |
| C O | 0.764888  | 2.097920  | 0.653105  |
| C O | 2.162098  | -1.330343 | 0.065022  |
| C O | 1.360051  | -0.364299 | 2.184248  |
| N O | 2.912420  | -2.102619 | -0.385367 |
| C O | 1.562512  | 0.962314  | -1.451711 |
| H O | 0.204714  | 2.027505  | 1.587598  |
| H O | 1.764649  | 2.478968  | 0.906322  |
| H O | 0.281942  | 2.854834  | 0.026004  |
| H O | 0.514894  | 0.153587  | 2.643755  |
| H O | 1.396467  | -1.379702 | 2.589846  |
| H O | 2.273690  | 0.151165  | 2.514028  |
| H O | 1.044113  | 1.726117  | -2.042001 |
| H O | 2.602123  | 1.293655  | -1.319172 |
| H O | 1.590590  | 0.035245  | -2.027314 |

#### TS-41+CH

B3LYP/6-31G(d) Geometry

|     |          |           |           |
|-----|----------|-----------|-----------|
| C O | 0.499910 | -0.610626 | 1.270650  |
| C O | 0.875243 | 0.747556  | 1.219622  |
| C O | 1.216035 | 1.298668  | -0.013292 |
| C O | 0.619694 | -1.373900 | 0.128963  |
| C O | 1.985753 | 0.460790  | -1.023357 |
| C O | 1.709770 | -1.064374 | -0.874114 |

|     |           |           |           |
|-----|-----------|-----------|-----------|
| H O | -0.050221 | -0.988105 | 2.128956  |
| H O | 0.663339  | 1.395949  | 2.066242  |
| H O | 1.410214  | 2.369305  | -0.058128 |
| H O | 0.183579  | -2.369305 | 0.097197  |
| H O | 3.056004  | 0.649457  | -0.871300 |
| H O | 1.763735  | 0.802651  | -2.041619 |
| H O | 1.486529  | -1.521523 | -1.843253 |
| H O | 2.621329  | -1.562951 | -0.514271 |
| C O | -0.674377 | 1.201506  | -1.006963 |
| C O | -0.977198 | -0.141583 | -1.303392 |
| C O | -1.847567 | 1.339385  | -0.023938 |
| C O | -2.155495 | -0.137159 | -0.412170 |
| O O | -3.056004 | -0.902328 | -0.146940 |
| H O | -0.307577 | 1.962697  | -1.687839 |
| H O | -0.704229 | -0.790493 | -2.128956 |
| H O | -2.642340 | 2.035479  | -0.316628 |
| H O | -1.583092 | 1.513497  | 1.026355  |

#### TS-42+CH

B3LYP/6-31G(d) Geometry

|     |           |           |           |
|-----|-----------|-----------|-----------|
| C O | -0.731669 | -1.014452 | 1.403906  |
| C O | -1.175031 | -1.597488 | 0.199004  |
| C O | -1.321918 | -0.767913 | -0.917997 |
| C O | -0.654701 | 0.357237  | 1.489317  |
| C O | -1.911680 | 0.623331  | -0.724968 |
| C O | -1.596444 | 1.216630  | 0.678584  |
| H O | -0.297201 | -1.638990 | 2.180716  |
| H O | -1.143502 | -2.677286 | 0.078416  |
| H O | -1.585721 | -1.243331 | -1.862091 |
| H O | -0.161629 | 0.819916  | 2.340979  |
| H O | -2.999211 | 0.549745  | -0.849552 |
| H O | -1.562746 | 1.290649  | -1.522337 |
| H O | -1.220501 | 2.240596  | 0.601739  |
| H O | -2.529101 | 1.292294  | 1.256792  |
| C O | 0.638222  | -0.236659 | -1.300633 |
| C O | 1.136817  | 0.728081  | -0.387603 |
| C O | 1.605195  | -1.324748 | -0.803411 |
| C O | 2.097753  | -0.238077 | 0.187545  |
| O O | 2.999211  | -0.179672 | 0.998059  |
| C O | 1.200868  | 2.224968  | -0.392994 |
| H O | 0.384457  | -0.046658 | -2.340979 |
| H O | 2.383461  | -1.625294 | -1.514824 |
| H O | 1.149721  | -2.221783 | -0.364988 |
| H O | 0.380194  | 2.677286  | -0.958517 |
| H O | 1.198599  | 2.642104  | 0.619902  |
| H O | 2.139886  | 2.550475  | -0.862649 |

#### TS-43+CH

B3LYP/6-31G(d) Geometry

|     |          |           |           |
|-----|----------|-----------|-----------|
| C O | 0.516392 | -1.874702 | 0.749722  |
| C O | 0.848380 | -0.653385 | 1.364265  |
| C O | 1.125385 | 0.444942  | 0.550647  |
| C O | 0.598147 | -1.959471 | -0.628845 |
| C O | 1.904817 | 0.228960  | -0.737950 |
| C O | 1.671177 | -1.179098 | -1.355795 |
| H O | 0.008247 | -2.648632 | 1.319423  |
| H O | 0.651648 | -0.512585 | 2.424378  |
| H O | 1.287976 | 1.408374  | 1.030499  |
| H O | 0.175091 | -2.820652 | -1.140119 |
| H O | 2.970883 | 0.347690  | -0.505871 |
| H O | 1.671754 | 1.016465  | -1.462507 |
| H O | 1.444603 | -1.109572 | -2.424378 |

|     |           |           |           |
|-----|-----------|-----------|-----------|
| H O | 2.597521  | -1.766746 | -1.284066 |
| C O | -0.845327 | 0.771580  | -0.326892 |
| C O | -1.032200 | -0.294052 | -1.246432 |
| C O | -1.938503 | 0.223825  | 0.617583  |
| C O | -2.148012 | -0.862538 | -0.469978 |
| O O | -2.970883 | -1.738292 | -0.632296 |
| C O | -0.674334 | 2.240497  | -0.626251 |
| H O | -0.773027 | -0.390029 | -2.297176 |
| H O | -2.812666 | 0.873412  | 0.752650  |
| H O | -1.602334 | -0.134558 | 1.597514  |
| H O | 0.113037  | 2.432916  | -1.362409 |
| H O | -1.610401 | 2.635953  | -1.044258 |
| H O | -0.450991 | 2.820652  | 0.275288  |

#### TS-44+CH

B3LYP/6-31G(d) Geometry

|     |           |           |           |
|-----|-----------|-----------|-----------|
| C O | -0.134201 | -2.234345 | 0.535440  |
| C O | 0.641770  | -1.415099 | 1.372647  |
| C O | 1.493481  | -0.485223 | 0.793077  |
| C O | 0.009676  | -2.095826 | -0.843784 |
| C O | 2.182951  | -0.786949 | -0.519889 |
| C O | 1.389328  | -1.795204 | -1.400072 |
| H O | -0.972754 | -2.791079 | 0.945597  |
| H O | 0.418576  | -1.364656 | 2.435568  |
| H O | 1.971067  | 0.263946  | 1.419967  |
| H O | -0.675643 | -2.630278 | -1.497829 |
| H O | 3.165647  | -1.213205 | -0.278722 |
| H O | 2.392315  | 0.144237  | -1.055936 |
| H O | 1.323254  | -1.446006 | -2.435568 |
| H O | 1.928082  | -2.751337 | -1.438551 |
| C O | -0.213593 | 0.811289  | -0.205737 |
| C O | -0.777774 | -0.055391 | -1.180259 |
| C O | -1.463838 | 0.773072  | 0.694400  |
| C O | -2.070293 | -0.100989 | -0.436726 |
| O O | -3.165647 | -0.562327 | -0.642973 |
| C O | 0.674942  | 1.899345  | -0.389188 |
| N O | 1.412781  | 2.791079  | -0.536611 |
| H O | -0.583540 | -0.123093 | -2.246063 |
| H O | -1.983261 | 1.728568  | 0.827347  |
| H O | -1.341318 | 0.282835  | 1.667106  |

#### TS-45+CH

B3LYP/6-31G(d) Geometry

|     |           |           |           |
|-----|-----------|-----------|-----------|
| C O | -1.302445 | -0.917668 | 1.085589  |
| C O | -1.704193 | -1.139444 | -0.251580 |
| C O | -1.453013 | -0.136369 | -1.197768 |
| C O | -0.890737 | 0.332732  | 1.468811  |
| C O | -1.641878 | 1.318436  | -0.772993 |
| C O | -1.313674 | 1.569993  | 0.726630  |
| H O | -1.193979 | -1.760470 | 1.763890  |
| H O | -1.976915 | -2.141026 | -0.573659 |
| H O | -1.764914 | -0.343602 | -2.221063 |
| H O | -0.431243 | 0.472964  | 2.444586  |
| H O | -2.689176 | 1.580928  | -0.966257 |
| H O | -1.040511 | 1.975017  | -1.411158 |
| H O | -0.555036 | 2.350364  | 0.837120  |
| H O | -2.205909 | 1.957851  | 1.240944  |
| C O | 0.534772  | -0.242604 | -1.415645 |
| C O | 1.279087  | 0.400451  | -0.398411 |
| C O | 1.101687  | -1.609346 | -0.980512 |
| C O | 1.869721  | -0.836308 | 0.130542  |
| O O | 2.689176  | -1.140528 | 0.965664  |

|      |          |           |           |
|------|----------|-----------|-----------|
| Cl O | 1.813266 | 2.050702  | -0.234420 |
| H O  | 0.480122 | 0.102453  | -2.444586 |
| H O  | 1.788150 | -2.068194 | -1.700264 |
| H O  | 0.368930 | -2.350364 | -0.639495 |

#### TS-46+CH

B3LYP/6-31G(d) Geometry

|     |           |           |           |
|-----|-----------|-----------|-----------|
| C O | -0.202494 | -2.304470 | -0.832539 |
| C O | -0.983497 | -1.420538 | -1.592027 |
| C O | -1.550867 | -0.321411 | -0.946548 |
| C O | -0.122563 | -2.099822 | 0.541980  |
| C O | -1.360767 | -1.594720 | 1.255011  |
| C O | -2.081641 | -0.466587 | 0.466491  |
| H O | 0.474905  | -2.996013 | -1.326976 |
| H O | -0.943658 | -1.457557 | -2.677761 |
| H O | -2.019039 | 0.455792  | -1.546201 |
| H O | 0.585167  | -2.685490 | 1.123876  |
| H O | -1.129695 | -1.280252 | 2.275924  |
| H O | -2.033580 | -2.457441 | 1.354626  |
| H O | -2.025779 | 0.495458  | 0.986969  |
| H O | -3.151293 | -0.701516 | 0.396005  |
| C O | 0.367444  | 0.706144  | -0.369361 |
| C O | 0.996811  | -0.070566 | 0.657242  |
| C O | -0.261797 | 1.969168  | -0.198596 |
| C O | 1.441726  | 0.358822  | -1.418967 |
| C O | 2.103988  | -0.443251 | -0.271929 |
| C O | 1.071376  | 0.143005  | 2.141026  |
| O O | 3.151293  | -1.034498 | -0.153147 |
| N O | -0.793601 | 2.996013  | -0.046175 |
| H O | 2.059230  | 1.201686  | -1.748945 |
| H O | 1.102023  | -0.211446 | -2.290965 |
| H O | 1.309855  | -0.780629 | 2.677761  |
| H O | 0.143307  | 0.557899  | 2.544586  |
| H O | 1.873610  | 0.859262  | 2.362518  |

#### TS-47+CH

B3LYP/6-31G(d) Geometry

|     |           |           |           |
|-----|-----------|-----------|-----------|
| C O | -0.777926 | -1.850597 | -1.009356 |
| C O | -1.142384 | -0.622240 | -1.589651 |
| C O | -1.198153 | 0.504345  | -0.759081 |
| C O | -0.670903 | -1.925088 | 0.365598  |
| C O | -1.803032 | 0.344994  | 0.630446  |
| C O | -1.575388 | -1.073631 | 1.224471  |
| H O | -0.405515 | -2.658100 | -1.634957 |
| H O | -1.118787 | -0.506486 | -2.670299 |
| H O | -1.403643 | 1.463571  | -1.231767 |
| H O | -0.216657 | -2.799609 | 0.825139  |
| H O | -2.880774 | 0.534075  | 0.550308  |
| H O | -1.416182 | 1.117598  | 1.304060  |
| H O | -1.202843 | -1.020087 | 2.251100  |
| H O | -2.538823 | -1.599981 | 1.289467  |
| C O | 0.827870  | 0.762686  | -0.256199 |
| C O | 1.195834  | -0.220167 | 0.715538  |
| C O | 1.703607  | 0.096386  | -1.340896 |
| C O | 2.075945  | -0.921394 | -0.237805 |
| O O | 2.880774  | -1.828455 | -0.161668 |
| C O | 0.800067  | 2.258109  | -0.031761 |
| C O | 1.286367  | -0.182273 | 2.210935  |
| H O | 2.566692  | 0.692517  | -1.664691 |
| H O | 1.185963  | -0.294472 | -2.225072 |
| H O | 0.136999  | 2.546319  | 0.791513  |
| H O | 1.808040  | 2.612098  | 0.225578  |
| H O | 0.481825  | 2.799609  | -0.928733 |

|     |          |           |          |
|-----|----------|-----------|----------|
| H O | 0.484681 | 0.404780  | 2.670299 |
| H O | 1.274122 | -1.188051 | 2.644227 |
| H O | 2.238203 | 0.278819  | 2.513242 |

#### TS-48+CH

B3LYP/6-31G(d) Geometry

|     |           |           |           |
|-----|-----------|-----------|-----------|
| C O | 0.763202  | -0.607500 | 1.248472  |
| C O | 1.082089  | 0.749283  | 1.065797  |
| C O | 1.434081  | 1.179719  | -0.216568 |
| C O | 0.900971  | -1.468896 | 0.175673  |
| C O | 2.296528  | 0.269043  | -1.078385 |
| C O | 2.004041  | -1.241500 | -0.834131 |
| H O | 0.222656  | -0.923000 | 2.137702  |
| H O | 0.818385  | 1.473274  | 1.833215  |
| H O | 1.592387  | 2.246350  | -0.371794 |
| H O | 0.477747  | -2.468916 | 0.229000  |
| H O | 3.346205  | 0.476860  | -0.835956 |
| H O | 2.176220  | 0.525563  | -2.137702 |
| H O | 1.782389  | -1.760637 | -1.772002 |
| H O | 2.907517  | -1.724018 | -0.435014 |
| C O | -0.378913 | 0.947704  | -1.278771 |
| C O | -0.698045 | -0.416954 | -1.319145 |
| C O | -1.467640 | 1.707202  | -0.515643 |
| C O | -1.904452 | -0.694569 | -0.520427 |
| C O | -2.263117 | 0.607964  | 0.215194  |
| O O | -2.529590 | -1.741452 | -0.458866 |
| H O | 0.094466  | 1.432657  | -2.128987 |
| H O | -0.366360 | -1.115206 | -2.077711 |
| H O | -2.108961 | 2.229845  | -1.238253 |
| H O | -1.065575 | 2.468916  | 0.160309  |
| H O | -1.947449 | 0.512837  | 1.262075  |
| H O | -3.346205 | 0.760456  | 0.216521  |

#### TS-49+CH

B3LYP/6-31G(d) Geometry

|     |           |           |           |
|-----|-----------|-----------|-----------|
| C O | -0.778398 | -0.634955 | 1.510572  |
| C O | -1.131051 | -1.613391 | 0.566177  |
| C O | -1.381812 | -1.194473 | -0.750962 |
| C O | -0.840842 | 0.694600  | 1.143435  |
| C O | -2.175644 | 0.091165  | -0.950627 |
| C O | -1.888766 | 1.147335  | 0.155857  |
| H O | -0.290102 | -0.925263 | 2.437971  |
| H O | -0.952352 | -2.663570 | 0.783339  |
| H O | -1.585448 | -1.969462 | -1.489833 |
| H O | -0.392631 | 1.453964  | 1.779651  |
| H O | -3.241469 | -0.167522 | -0.936779 |
| H O | -1.977377 | 0.502548  | -1.947470 |
| H O | -1.623457 | 2.116421  | -0.274588 |
| H O | -2.808518 | 1.326455  | 0.731589  |
| C O | 0.450745  | -0.594294 | -1.421657 |
| C O | 0.885715  | 0.574931  | -0.759570 |
| C O | 1.422448  | -1.740769 | -1.118888 |
| C O | 1.986064  | 0.240719  | 0.168228  |
| C O | 2.176339  | -1.281909 | 0.143616  |
| O O | 2.672530  | 1.037146  | 0.793106  |
| C O | 0.757946  | 1.989099  | -1.255988 |
| H O | 0.066242  | -0.509459 | -2.437971 |
| H O | 2.120275  | -1.843052 | -1.961092 |
| H O | 0.924882  | -2.708569 | -0.996602 |
| H O | 1.738811  | -1.714253 | 1.051731  |
| H O | 3.241469  | -1.531461 | 0.147401  |
| H O | -0.115708 | 2.132911  | -1.898280 |
| H O | 1.645732  | 2.249178  | -1.849805 |

|     |          |          |           |
|-----|----------|----------|-----------|
| H O | 0.721076 | 2.708569 | -0.432119 |
|-----|----------|----------|-----------|

#### TS-50+CH

B3LYP/6-31G(d) Geometry

|     |           |           |           |
|-----|-----------|-----------|-----------|
| C O | 0.576381  | -1.882196 | 0.721645  |
| C O | 0.928700  | -0.679478 | 1.351415  |
| C O | 1.406792  | 0.364364  | 0.553735  |
| C O | 0.734867  | -1.973075 | -0.655714 |
| C O | 2.358471  | -0.010358 | -0.571766 |
| C O | 1.915219  | -1.300279 | -1.322032 |
| H O | -0.025513 | -2.617483 | 1.250190  |
| H O | 0.615359  | -0.494838 | 2.376348  |
| H O | 1.595058  | 1.327794  | 1.025165  |
| H O | 0.272441  | -2.797908 | -1.192633 |
| H O | 3.342289  | -0.181220 | -0.116030 |
| H O | 2.493769  | 0.822561  | -1.266849 |
| H O | 1.698465  | -1.098569 | -2.376348 |
| H O | 2.745044  | -2.020631 | -1.323858 |
| C O | -0.363066 | 0.910880  | -0.598224 |
| C O | -0.718149 | -0.252318 | -1.313187 |
| C O | -1.431315 | 1.164214  | 0.482039  |
| C O | -1.945474 | -0.860010 | -0.769164 |
| C O | -2.264735 | -0.128557 | 0.543944  |
| O O | -2.610902 | -1.755958 | -1.264009 |
| C O | 0.193698  | 2.133490  | -1.301533 |
| H O | -0.434055 | -0.437436 | -2.343525 |
| H O | -2.059998 | 2.004992  | 0.154590  |
| H O | -1.004973 | 1.452707  | 1.448257  |
| H O | -1.963146 | -0.768660 | 1.382481  |
| H O | -3.342289 | 0.036672  | 0.635698  |
| H O | 0.851456  | 1.873042  | -2.135568 |
| H O | 0.742834  | 2.797908  | -0.624204 |
| H O | -0.638882 | 2.717800  | -1.717283 |

#### TS-51+CH

B3LYP/6-31G(d) Geometry

|     |           |           |           |
|-----|-----------|-----------|-----------|
| C O | -0.048850 | -2.106870 | 0.499026  |
| C O | 0.663598  | -1.258994 | 1.356878  |
| C O | 1.550177  | -0.343061 | 0.798738  |
| C O | 0.143012  | -1.960570 | -0.878698 |
| C O | 2.338880  | -0.726230 | -0.433694 |
| C O | 1.544642  | -1.669209 | -1.384595 |
| H O | -0.892459 | -2.679974 | 0.875561  |
| H O | 0.374238  | -1.178973 | 2.402173  |
| H O | 1.988947  | 0.427896  | 1.428374  |
| H O | -0.513580 | -2.500991 | -1.556965 |
| H O | 3.243968  | -1.241120 | -0.085059 |
| H O | 2.688592  | 0.169851  | -0.953915 |
| H O | 1.510867  | -1.266389 | -2.402173 |
| H O | 2.062321  | -2.634214 | -1.459782 |
| C O | -0.064955 | 0.950719  | -0.330366 |
| C O | -0.654421 | 0.022999  | -1.221185 |
| C O | -1.072358 | 1.369233  | 0.758480  |
| C O | -2.068834 | -0.213148 | -0.822557 |
| C O | -2.278508 | 0.433521  | 0.552831  |
| O O | -2.910300 | -0.807527 | -1.468382 |
| C O | 0.906622  | 1.900122  | -0.761627 |
| N O | 1.706312  | 2.679974  | -1.097117 |
| H O | -0.382957 | -0.037007 | -2.269252 |
| H O | -1.356763 | 2.415860  | 0.595776  |
| H O | -0.649107 | 1.308199  | 1.764579  |
| H O | -3.243968 | 0.946711  | 0.579455  |
| H O | -2.316558 | -0.361133 | 1.307624  |



### TS-52+CH

B3LYP/6-31G(d) Geometry

|      |           |           |           |
|------|-----------|-----------|-----------|
| C 0  | -0.953288 | -0.782106 | 1.398620  |
| C 0  | -1.323169 | -1.366414 | 0.173764  |
| C 0  | -1.354647 | -0.546312 | -0.970231 |
| C 0  | -0.813966 | 0.585388  | 1.476773  |
| C 0  | -1.926330 | 0.860950  | -0.807859 |
| C 0  | -1.593345 | 1.498294  | 0.571678  |
| H 0  | -0.631178 | -1.411452 | 2.224991  |
| H 0  | -1.333220 | -2.448876 | 0.074039  |
| H 0  | -1.629121 | -1.031187 | -1.907503 |
| H 0  | -0.344669 | 1.032397  | 2.349972  |
| H 0  | -3.014269 | 0.787355  | -0.923897 |
| H 0  | -1.573229 | 1.504550  | -1.621126 |
| H 0  | -1.066876 | 2.448876  | 0.451184  |
| H 0  | -2.526484 | 1.744461  | 1.100002  |
| C 0  | 0.548785  | -0.177323 | -1.374234 |
| C 0  | 1.157784  | 0.671944  | -0.424826 |
| C 0  | 1.303525  | -1.512664 | -1.333197 |
| C 0  | 2.114822  | -0.040409 | 0.437893  |
| C 0  | 2.016015  | -1.520113 | 0.034217  |
| O 0  | 2.876519  | 0.431410  | 1.263152  |
| Cl 0 | 1.280881  | 2.405911  | -0.603891 |
| H 0  | 0.305292  | 0.239455  | -2.349972 |
| H 0  | 2.043389  | -1.517317 | -2.143879 |
| H 0  | 0.650396  | -2.378353 | -1.483503 |
| H 0  | 3.014269  | -1.966537 | 0.013815  |
| H 0  | 1.431963  | -2.061666 | 0.787973  |

### TS-53+CH

B3LYP/6-31G(d) Geometry

|     |           |           |           |
|-----|-----------|-----------|-----------|
| C 0 | 0.079907  | -2.197184 | -0.846002 |
| C 0 | -0.712792 | -1.413826 | -1.689655 |
| C 0 | -1.518257 | -0.429105 | -1.104184 |
| C 0 | -0.018796 | -1.987018 | 0.530915  |
| C 0 | -2.219475 | -0.740545 | 0.203914  |
| C 0 | -1.392910 | -1.704970 | 1.100884  |
| H 0 | 0.894048  | -2.790593 | -1.254741 |
| H 0 | -0.528991 | -1.411013 | -2.761260 |
| H 0 | -2.024967 | 0.285193  | -1.750035 |
| H 0 | 0.703850  | -2.460888 | 1.190962  |
| H 0 | -3.179857 | -1.209283 | -0.045378 |
| H 0 | -2.468528 | 0.187448  | 0.727264  |
| H 0 | -1.325241 | -1.336048 | 2.126868  |
| H 0 | -1.906209 | -2.673786 | 1.166963  |
| C 0 | 0.077919  | 0.896913  | -0.304778 |
| C 0 | 0.766347  | 0.160222  | 0.705932  |
| C 0 | 1.007950  | 1.151498  | -1.510164 |
| C 0 | 2.125965  | -0.182966 | 0.197304  |
| C 0 | 2.215679  | 0.226928  | -1.275855 |
| O 0 | 3.027030  | -0.665553 | 0.859839  |
| C 0 | -0.827452 | 1.944537  | 0.056945  |
| C 0 | 0.606122  | 0.381481  | 2.189429  |
| N 0 | -1.577712 | 2.790593  | 0.339793  |
| H 0 | 1.319256  | 2.203051  | -1.498786 |
| H 0 | 0.509270  | 0.975736  | -2.466946 |
| H 0 | 3.179857  | 0.707328  | -1.465766 |
| H 0 | 2.174951  | -0.671097 | -1.902341 |
| H 0 | -0.424439 | 0.609881  | 2.470877  |
| H 0 | 0.959433  | -0.480973 | 2.761260  |
| H 0 | 1.222841  | 1.237239  | 2.494082  |

### TS-54+CH

B3LYP/6-31G(d) Geometry

|     |           |           |           |
|-----|-----------|-----------|-----------|
| C 0 | -0.678716 | -1.723435 | -1.363796 |
| C 0 | -1.077415 | -0.442276 | -1.766453 |
| C 0 | -1.373554 | 0.496935  | -0.761233 |
| C 0 | -0.713166 | -2.032267 | -0.013057 |
| C 0 | -2.188682 | -0.004389 | 0.426173  |
| C 0 | -1.813169 | -1.455417 | 0.842622  |
| H 0 | -0.168220 | -2.381121 | -2.063298 |
| H 0 | -0.909872 | -0.120225 | -2.791211 |
| H 0 | -1.621581 | 1.507867  | -1.083418 |
| H 0 | -0.215393 | -2.928751 | 0.348338  |
| H 0 | -3.245157 | 0.025282  | 0.132475  |
| H 0 | -2.097329 | 0.680737  | 1.273870  |
| H 0 | -1.555016 | -1.516147 | 1.903080  |
| H 0 | -2.689396 | -2.108233 | 0.718968  |
| C 0 | 0.477827  | 0.896104  | 0.099944  |
| C 0 | 0.900151  | -0.274238 | 0.792912  |
| C 0 | 1.423562  | 1.113394  | -1.098613 |
| C 0 | 1.986984  | -0.946240 | 0.051132  |
| C 0 | 2.177861  | -0.213812 | -1.282543 |
| O 0 | 2.668906  | -1.879159 | 0.453366  |
| C 0 | 0.125097  | 2.161681  | 0.864662  |
| C 0 | 0.806994  | -0.503150 | 2.276172  |
| H 0 | 2.129882  | 1.912925  | -0.833404 |
| H 0 | 0.898258  | 1.445455  | -2.000188 |
| H 0 | 1.756879  | -0.817771 | -2.094143 |
| H 0 | 3.245157  | -0.093114 | -1.491849 |
| H 0 | -0.581315 | 1.993917  | 1.682127  |
| H 0 | -0.294774 | 2.928751  | 0.204256  |
| H 0 | 1.037297  | 2.581555  | 1.310778  |
| H 0 | -0.146136 | -0.184253 | 2.707694  |
| H 0 | 1.595543  | 0.065896  | 2.791211  |
| H 0 | 0.975963  | -1.557220 | 2.515098  |

### TS-55+CH

B3LYP/6-31G(d) Geometry

|     |           |           |           |
|-----|-----------|-----------|-----------|
| C 0 | 0.290076  | -0.701548 | 1.251250  |
| C 0 | 0.290077  | 0.701547  | 1.251250  |
| C 0 | 0.667576  | 1.365713  | 0.088641  |
| C 0 | 0.667575  | -1.365713 | 0.088640  |
| C 0 | 1.753592  | 0.779115  | -0.789851 |
| C 0 | 1.753592  | -0.779115 | -0.789851 |
| H 0 | -0.216343 | -1.241185 | 2.046966  |
| H 0 | -0.216342 | 1.241184  | 2.046967  |
| H 0 | 0.514609  | 2.440355  | 0.022554  |
| H 0 | 0.514609  | -2.440355 | 0.022552  |
| H 0 | 2.713418  | 1.142073  | -0.399160 |
| H 0 | 1.679588  | 1.175137  | -1.808156 |
| H 0 | 1.679589  | -1.175137 | -1.808156 |
| H 0 | 2.713418  | -1.142072 | -0.399159 |
| C 0 | -1.025879 | 0.696916  | -1.266148 |
| C 0 | -1.025879 | -0.696915 | -1.266148 |
| C 0 | -2.152341 | -1.141792 | -0.416482 |
| C 0 | -2.152341 | 1.141792  | -0.416482 |
| O 0 | -2.713418 | 0.000000  | 0.167974  |
| O 0 | -2.580425 | 2.242387  | -0.193712 |
| O 0 | -2.580425 | -2.242387 | -0.193712 |
| H 0 | -0.648460 | 1.343297  | -2.046967 |
| H 0 | -0.648461 | -1.343296 | -2.046967 |

### TS-56+CH

B3LYP/6-31G(d) Geometry

|     |           |           |           |
|-----|-----------|-----------|-----------|
| C O | 0.270525  | -0.607558 | 1.244395  |
| C O | 0.624373  | 0.751388  | 1.185602  |
| C O | 1.033473  | 1.278608  | -0.038676 |
| C O | 0.426078  | -1.380407 | 0.107565  |
| C O | 1.566380  | -1.094208 | -0.845464 |
| C O | 1.884355  | 0.426387  | -0.966510 |
| H O | -0.315275 | -0.977040 | 2.081948  |
| H O | 0.346156  | 1.413732  | 2.001779  |
| H O | 1.203842  | 2.352451  | -0.108505 |
| H O | -0.012734 | -2.374370 | 0.071197  |
| H O | 1.368686  | -1.536214 | -1.827654 |
| H O | 2.450476  | -1.618801 | -0.457311 |
| H O | 1.776169  | 0.769498  | -2.002500 |
| H O | 2.935927  | 0.597059  | -0.703844 |
| C O | -0.798438 | 1.121728  | -1.174971 |
| C O | -1.118754 | -0.229978 | -1.281910 |
| C O | -2.315831 | -0.508329 | -0.466227 |
| O O | -2.935927 | -1.533293 | -0.311874 |
| C O | -1.902328 | 1.756508  | -0.348003 |
| O O | -2.665459 | 0.661744  | 0.179489  |
| H O | -0.338814 | 1.685589  | -1.980010 |
| H O | -0.836470 | -0.899481 | -2.081948 |
| H O | -2.559933 | 2.374370  | -0.975797 |
| H O | -1.556054 | 2.363289  | 0.492360  |

### TS-57+CH

B3LYP/6-31G(d) Geometry

|     |           |           |           |
|-----|-----------|-----------|-----------|
| C O | -0.941269 | 0.519789  | 1.372285  |
| C O | -1.234492 | -0.791128 | 0.962392  |
| C O | -1.563762 | -1.005333 | -0.380933 |
| C O | -1.102718 | 1.546095  | 0.458182  |
| C O | -2.225169 | 1.463237  | -0.552043 |
| C O | -2.449064 | 0.016192  | -1.081255 |
| H O | -0.398570 | 0.689945  | 2.299573  |
| H O | -0.960836 | -1.630402 | 1.597403  |
| H O | -1.699169 | -2.033429 | -0.715159 |
| H O | -0.691861 | 2.530732  | 0.664359  |
| H O | -2.059818 | 2.166492  | -1.373985 |
| H O | -3.137161 | 1.807301  | -0.043779 |
| H O | -2.298146 | -0.033037 | -2.166406 |
| H O | -3.493124 | -0.273274 | -0.909109 |
| C O | 0.248707  | -0.570972 | -1.375461 |
| C O | 0.495576  | 0.804394  | -1.210044 |
| C O | 1.693115  | 1.333825  | -0.536411 |
| O O | 1.947585  | 2.534326  | -0.513064 |
| C O | 1.278674  | -1.576410 | -0.881424 |
| C O | 2.682062  | 0.321819  | 0.045859  |
| C O | 2.080268  | -1.061713 | 0.321576  |
| H O | -0.251435 | -0.859251 | -2.299573 |
| H O | 0.018363  | 1.520991  | -1.870480 |
| H O | 1.971171  | -1.784071 | -1.713041 |
| H O | 0.801473  | -2.534326 | -0.640784 |
| H O | 3.134624  | 0.760185  | 0.941877  |
| H O | 3.493124  | 0.236628  | -0.693772 |
| H O | 2.875119  | -1.774784 | 0.572835  |
| H O | 1.423920  | -1.007677 | 1.196483  |

### TS-58+CH

B3LYP/6-31G(d) Geometry

|     |           |           |          |
|-----|-----------|-----------|----------|
| C O | -0.893222 | -0.647530 | 1.523800 |
| C O | -1.155374 | -1.713055 | 0.649649 |

|     |           |           |           |
|-----|-----------|-----------|-----------|
| C O | -1.491810 | -1.400717 | -0.679759 |
| C O | -1.137218 | 0.641582  | 1.087778  |
| C O | -2.283307 | 0.893176  | 0.138264  |
| C O | -2.464909 | -0.249302 | -0.901695 |
| H O | -0.333213 | -0.820526 | 2.440406  |
| H O | -0.847007 | -2.721393 | 0.913721  |
| H O | -1.620264 | -2.234176 | -1.370471 |
| H O | -0.758077 | 1.489769  | 1.651911  |
| H O | -2.178600 | 1.864735  | -0.350289 |
| H O | -3.191546 | 0.970755  | 0.753384  |
| H O | -2.372765 | 0.130319  | -1.925650 |
| H O | -3.480816 | -0.654932 | -0.820348 |
| C O | 0.231420  | -0.619309 | -1.454027 |
| C O | 0.514058  | 0.645422  | -0.877210 |
| C O | 1.662251  | 0.831891  | 0.038659  |
| O O | 1.953198  | 1.938636  | 0.487869  |
| C O | 1.263866  | -1.737510 | -1.346383 |
| C O | 2.603353  | -0.347004 | 0.298345  |
| C O | 2.034168  | -1.733001 | -0.020434 |
| C O | 0.057373  | 1.925502  | -1.546897 |
| H O | -0.234742 | -0.564256 | -2.440406 |
| H O | 1.978054  | -1.606367 | -2.174929 |
| H O | 0.791565  | -2.714949 | -1.506090 |
| H O | 2.962517  | -0.277699 | 1.331058  |
| H O | 3.480816  | -0.147993 | -0.336046 |
| H O | 2.844898  | -2.471346 | -0.060675 |
| H O | 1.369776  | -2.051630 | 0.787227  |
| H O | -0.825498 | 1.772292  | -2.173757 |
| H O | 0.859411  | 2.301519  | -2.198214 |
| H O | -0.140292 | 2.721393  | -0.824851 |

### TS-59+CH

B3LYP/6-31G(d) Geometry

|     |           |           |           |
|-----|-----------|-----------|-----------|
| C O | 0.712274  | -1.346140 | 1.278709  |
| C O | 1.078453  | -0.026143 | 1.571843  |
| C O | 1.566263  | 0.767812  | 0.528776  |
| C O | 0.887300  | -1.798266 | -0.024912 |
| C O | 2.106883  | -1.350018 | -0.801341 |
| C O | 2.527851  | 0.106179  | -0.445780 |
| H O | 0.090037  | -1.905883 | 1.973491  |
| H O | 0.767692  | 0.426919  | 2.510326  |
| H O | 1.754573  | 1.821971  | 0.726791  |
| H O | 0.418908  | -2.726245 | -0.342111 |
| H O | 1.944287  | -1.471417 | -1.877070 |
| H O | 2.925452  | -2.036648 | -0.545020 |
| H O | 2.655309  | 0.712673  | -1.345929 |
| H O | 3.511848  | 0.086044  | 0.040219  |
| C O | -0.209300 | 0.991512  | -0.753594 |
| C O | -0.519248 | -0.331255 | -1.153093 |
| C O | -1.774112 | -1.020849 | -0.793140 |
| O O | -2.090590 | -2.091033 | -1.303015 |
| C O | -1.203675 | 1.712822  | 0.158499  |
| C O | -2.731167 | -0.307660 | 0.162058  |
| C O | -2.069981 | 0.780641  | 1.014509  |
| C O | 0.403621  | 1.913921  | -1.799084 |
| H O | -0.092973 | -0.701889 | -2.081584 |
| H O | -1.867962 | 2.306532  | -0.491674 |
| H O | -0.684392 | 2.442812  | 0.792159  |
| H O | -3.234224 | -1.064394 | 0.773660  |
| H O | -3.511848 | 0.136857  | -0.474289 |
| H O | -2.836787 | 1.367970  | 1.534798  |
| H O | -1.456632 | 0.316173  | 1.791636  |
| H O | 1.036215  | 1.375915  | -2.510326 |



H O 0.992496 2.726245 -1.355993  
H O -0.402214 2.384660 -2.379723

### TS-60+CH

B3LYP/6-31G(d) Geometry

C O 0.321466 -1.916794 0.624213  
C O 0.919428 -0.890100 1.362411  
C O 1.718344 0.031459 0.689048  
C O 0.535376 -1.937992 -0.759792  
C O 1.922637 -1.589773 -1.269715  
C O 2.589038 -0.445682 -0.451532  
H O -0.471983 -2.515559 1.065362  
H O 0.598367 -0.696219 2.383228  
H O 2.054772 0.926754 1.207571  
H O -0.042338 -2.626322 -1.371534  
H O 1.890698 -1.345530 -2.336332  
H O 2.528519 -2.501119 -1.186171  
H O 2.876307 0.392797 -1.091442  
H O 3.521770 -0.814350 -0.004153  
C O 0.004267 0.982059 -0.635402  
C O -0.456207 -0.134434 -1.388862  
C O -1.872202 -0.598832 -1.298468  
O O -2.302984 -1.449251 -2.063326  
C O -0.912938 1.646891 0.397599  
C O -2.779765 0.074827 -0.275375  
C O -2.023352 0.714034 0.894246  
C O 0.915771 1.881763 -1.275088  
N O 1.659400 2.626322 -1.777906  
H O -0.042373 -0.274224 -2.383228  
H O -1.372640 2.526278 -0.078523  
H O -0.325851 2.032041 1.238088  
H O -3.521770 -0.657695 0.058733  
H O -3.337278 0.847868 -0.826661  
H O -2.717926 1.281184 1.524780  
H O -1.595150 -0.068252 1.528070

### TS-61+CH

B3LYP/6-31G(d) Geometry

C O -0.925200 -0.909380 1.489009  
C O -1.124945 -1.647852 0.311360  
C O -1.449232 -0.940364 -0.864821  
C O -1.241724 0.432415 1.501574  
C O -2.324943 0.974275 0.612629  
C O -2.464235 0.193211 -0.725368  
H O -0.381211 -1.349964 2.321745  
H O -0.790105 -2.680349 0.255166  
H O -1.579289 -1.536946 -1.768398  
H O -0.906407 1.063032 2.321294  
H O -2.168175 2.040677 0.432859  
H O -3.264048 0.904855 1.181685  
H O -2.386697 0.876687 -1.577020  
H O -3.461351 -0.259621 -0.781885  
C O 0.214321 -0.002968 -1.369708  
C O 0.507934 1.075799 -0.498049  
C O 1.625283 1.097954 0.464031  
O O 1.881835 2.057107 1.179126  
C O 1.292716 -1.075921 -1.528450  
C O 2.583394 -0.099851 0.430272  
C O 2.054400 -1.375738 -0.232529  
Cl O -0.112811 2.680349 -0.917128  
H O -0.213362 0.312242 -2.321745  
H O 2.002003 -0.711603 -2.286730  
H O 0.854449 -1.996445 -1.933689

H O 2.926336 -0.284527 1.453767  
H O 3.461351 0.271458 -0.119202  
H O 2.888057 -2.056425 -0.445813  
H O 1.398499 -1.906411 0.462878

### TS-62+CH

B3LYP/6-31G(d) Geometry

C O -0.187145 -1.804643 -1.322305  
C O -0.821616 -0.753156 -1.984740  
C O -1.635058 0.100589 -1.226700  
C O -0.453778 -1.974878 0.040601  
C O -1.882687 -1.760836 0.493574  
C O -2.526658 -0.507899 -0.162014  
H O 0.643191 -2.327829 -1.791236  
H O -0.508125 -0.467483 -2.985691  
H O -2.009326 1.013658 -1.685590  
H O 0.147045 -2.674165 0.615808  
H O -1.950143 -1.721184 1.582672  
H O -2.439090 -2.658812 0.193129  
H O -2.799650 0.247338 0.580492  
H O -3.465166 -0.795291 -0.653085  
C O -0.068050 1.000173 0.095658  
C O 0.436134 -0.075652 0.905440  
C O 1.851695 -0.541362 0.714162  
O O 2.331090 -1.401886 1.440628  
C O 0.850834 1.723466 -0.904596  
C O 2.736923 0.154012 -0.315603  
C O 1.986906 0.853618 -1.449747  
C O -0.987496 1.914467 0.718691  
C O -0.027322 -0.224296 2.346214  
N O -1.737747 2.674165 1.186042  
H O 1.290908 2.584375 -0.379187  
H O 0.257147 2.142437 -1.724317  
H O 3.465166 -0.575975 -0.683854  
H O 3.314718 0.895181 0.258737  
H O 2.677999 1.484174 -2.021899  
H O 1.594742 0.112700 -2.150244  
H O -1.077209 0.042383 2.478221  
H O 0.558916 0.449080 2.985691  
H O 0.147048 -1.237739 2.712006

### TS-63+CH

B3LYP/6-31G(d) Geometry

C O 0.697106 0.512770 -2.010987  
C O 1.065542 -0.788644 -1.653133  
C O 1.511670 -1.000952 -0.333401  
C O 0.920726 1.535730 -1.100858  
C O 2.154750 1.480925 -0.236832  
C O 2.492700 0.031361 0.214297  
H O 0.070900 0.682777 -2.884292  
H O 0.768842 -1.629207 -2.275070  
H O 1.736925 -2.027535 -0.045086  
H O 0.455108 2.506672 -1.247493  
H O 2.063482 2.158398 0.615399  
H O 2.984558 1.878570 -0.838942  
H O 2.561826 -0.033949 1.303579  
H O 3.486493 -0.241320 -0.161451  
C O -0.195585 -0.731993 0.817061  
C O -0.509389 0.666439 0.789635  
C O -1.702413 1.185274 0.073750  
O O -2.027805 2.369958 0.136781  
C O -1.212912 -1.703962 0.198140  
C O -2.645351 0.206255 -0.625791

|     |           |           |           |
|-----|-----------|-----------|-----------|
| C O | -2.043189 | -1.156895 | -0.966342 |
| C O | 0.323674  | -1.315091 | 2.132572  |
| C O | -0.056168 | 1.590061  | 1.903024  |
| H O | -1.904267 | -1.989737 | 1.007928  |
| H O | -0.707449 | -2.632503 | -0.098011 |
| H O | -3.063267 | 0.706747  | -1.505870 |
| H O | -3.486493 | 0.079845  | 0.073241  |
| H O | -2.841087 | -1.870367 | -1.209014 |
| H O | -1.424951 | -1.075286 | -1.862382 |
| H O | -0.477338 | -1.292021 | 2.884292  |
| H O | 1.172609  | -0.775872 | 2.556219  |
| H O | 0.618718  | -2.362679 | 2.005902  |
| H O | 0.957032  | 1.387927  | 2.255359  |
| H O | -0.722891 | 1.477313  | 2.771805  |
| H O | -0.131397 | 2.632503  | 1.588298  |

#### TS-64+CH

B3LYP/6-31G(d) Geometry

|     |           |           |           |
|-----|-----------|-----------|-----------|
| C O | 1.479453  | -1.442093 | -0.207832 |
| C O | 0.372663  | -0.857934 | -1.071284 |
| O O | 1.674511  | -0.610260 | 0.946453  |
| C O | 2.868518  | -1.320013 | -0.878710 |
| C O | 2.322692  | 0.514559  | 0.388175  |
| C O | 0.353684  | 0.543367  | -1.179911 |
| O O | 3.303853  | -0.005998 | -0.514457 |
| C O | 1.325694  | 1.353082  | -0.433882 |
| O O | 1.430754  | 2.570406  | -0.505076 |
| H O | 1.259904  | -2.454592 | 0.138283  |
| H O | 0.112374  | -1.442635 | -1.953140 |
| H O | 2.833435  | -1.412671 | -1.969111 |
| H O | 3.568250  | -2.061019 | -0.472233 |
| H O | 2.807454  | 1.099023  | 1.172634  |
| H O | -0.129168 | 1.035854  | -2.016728 |
| C O | -1.416087 | -1.492209 | -0.143171 |
| C O | -1.283546 | -0.934475 | 1.130607  |
| C O | -2.406871 | -0.868534 | -1.115750 |
| C O | -1.336934 | 0.465041  | 1.253546  |
| C O | -2.539646 | 0.673020  | -0.935743 |
| C O | -1.624669 | 1.219711  | 0.135274  |
| H O | -1.293430 | -2.570406 | -0.245064 |
| H O | -0.887017 | -1.527707 | 1.949577  |
| H O | -3.382507 | -1.337999 | -0.939438 |
| H O | -2.135846 | -1.120582 | -2.147906 |
| H O | -0.940612 | 0.938885  | 2.147906  |
| H O | -2.381952 | 1.199362  | -1.882445 |
| H O | -3.568250 | 0.914612  | -0.632305 |
| H O | -1.466748 | 2.295074  | 0.150540  |

#### TS-65+CH

B3LYP/6-31G(d) Geometry

|     |           |           |           |
|-----|-----------|-----------|-----------|
| C O | 1.509638  | -1.544403 | -0.682025 |
| C O | 0.382927  | -0.686394 | -1.245664 |
| O O | 1.680852  | -1.258580 | 0.714069  |
| C O | 2.895077  | -1.124868 | -1.226540 |
| C O | 2.293864  | 0.010779  | 0.673670  |
| C O | 0.375379  | 0.674015  | -0.846472 |
| O O | 3.303910  | -0.077926 | -0.338943 |
| C O | 1.300741  | 1.096316  | 0.220534  |
| O O | 1.412175  | 2.246825  | 0.629287  |
| C O | -0.113536 | 1.782809  | -1.748827 |
| H O | 1.316107  | -2.614857 | -0.785440 |
| H O | 0.166323  | -0.874709 | -2.299849 |
| H O | 2.860552  | -0.751937 | -2.255689 |

|     |           |           |           |
|-----|-----------|-----------|-----------|
| H O | 3.612138  | -1.952984 | -1.164612 |
| H O | 2.751467  | 0.242692  | 1.637093  |
| H O | -0.850086 | 1.432350  | -2.477808 |
| H O | 0.734299  | 2.198682  | -2.311831 |
| H O | -0.535984 | 2.614857  | -1.179158 |
| C O | -1.292241 | -1.664118 | -0.640633 |
| C O | -1.138494 | -1.725164 | 0.754290  |
| C O | -2.386310 | -0.758425 | -1.195022 |
| C O | -1.239585 | -0.526009 | 1.478957  |
| C O | -2.594231 | 0.526422  | -0.341996 |
| C O | -1.644820 | 0.616970  | 0.825457  |
| H O | -1.159579 | -2.592216 | -1.197892 |
| H O | -0.684256 | -2.594524 | 1.219657  |
| H O | -3.316941 | -1.338475 | -1.209798 |
| H O | -2.172854 | -0.505375 | -2.239835 |
| H O | -0.814690 | -0.466594 | 2.477808  |
| H O | -2.536774 | 1.427760  | -0.957843 |
| H O | -3.612138 | 0.525234  | 0.074531  |
| H O | -1.535367 | 1.585988  | 1.306292  |

#### TS-66+CH

B3LYP/6-31G(d) Geometry

|     |           |           |           |
|-----|-----------|-----------|-----------|
| C O | 1.435230  | -0.898080 | 0.306104  |
| C O | 0.334688  | -0.671543 | -0.734750 |
| O O | 1.615985  | 0.282605  | 1.102156  |
| C O | 2.848773  | -1.015480 | -0.319282 |
| C O | 2.286461  | 1.142129  | 0.205097  |
| C O | 0.319611  | 0.631285  | -1.291084 |
| O O | 3.286838  | 0.342636  | -0.430187 |
| C O | 1.314053  | 1.635259  | -0.881276 |
| O O | 1.442986  | 2.740616  | -1.390202 |
| C O | 0.063270  | -1.861675 | -1.642162 |
| H O | 1.205163  | -1.728309 | 0.978398  |
| H O | 2.863903  | -1.487196 | -1.305891 |
| H O | 3.523607  | -1.562366 | 0.350998  |
| H O | 2.753371  | 1.966210  | 0.748040  |
| H O | -0.112935 | 0.792943  | -2.274385 |
| H O | -0.291159 | -2.740616 | -1.090498 |
| H O | 0.977363  | -2.159753 | -2.171733 |
| H O | -0.675851 | -1.618475 | -2.409913 |
| C O | -1.442668 | -0.803862 | 0.518616  |
| C O | -1.226083 | 0.229524  | 1.435575  |
| C O | -2.533890 | -0.586525 | -0.518033 |
| C O | -1.267401 | 1.547763  | 0.962407  |
| C O | -2.525250 | 0.857170  | -1.098271 |
| C O | -1.544091 | 1.757360  | -0.380972 |
| H O | -1.330350 | -1.830912 | 0.865008  |
| H O | -0.792905 | 0.024461  | 2.409913  |
| H O | -3.491952 | -0.765573 | -0.013697 |
| H O | -2.475733 | -1.332349 | -1.315228 |
| H O | -0.843172 | 2.348000  | 1.563605  |
| H O | -2.329680 | 0.857928  | -2.175653 |
| H O | -3.523607 | 1.300966  | -0.980764 |
| H O | -1.360752 | 2.734088  | -0.821779 |

#### TS-67+CH

B3LYP/6-31G(d) Geometry

|     |           |           |           |
|-----|-----------|-----------|-----------|
| C O | -1.502591 | 0.750961  | 0.479347  |
| C O | -0.403781 | 0.613813  | -0.581054 |
| O O | -1.818655 | -0.546004 | 0.998428  |
| C O | -2.860015 | 1.143671  | -0.142591 |
| C O | -2.534641 | -1.129347 | -0.072287 |
| C O | -0.420040 | -0.571694 | -1.364537 |

|   |   |           |           |           |
|---|---|-----------|-----------|-----------|
| O | 0 | -3.388754 | -0.111921 | -0.590838 |
| C | 0 | -1.547211 | -1.528539 | -1.180149 |
| O | 0 | -1.716032 | -2.518319 | -1.870404 |
| C | 0 | 0.049361  | 1.838234  | -1.155865 |
| N | 0 | 0.419472  | 2.853245  | -1.596135 |
| H | 0 | -1.205730 | 1.394210  | 1.308854  |
| H | 0 | -2.773657 | 1.831284  | -0.988283 |
| H | 0 | -3.526330 | 1.572954  | 0.615504  |
| H | 0 | -3.120953 | -1.978847 | 0.284070  |
| H | 0 | -0.029122 | -0.533991 | -2.376667 |
| C | 0 | 1.534919  | 0.347807  | 0.777644  |
| C | 0 | 1.129586  | -0.840142 | 1.373873  |
| C | 0 | 2.524807  | 0.313984  | -0.363677 |
| C | 0 | 0.996435  | -1.978786 | 0.569997  |
| C | 0 | 2.353963  | -0.942575 | -1.266534 |
| C | 0 | 1.230537  | -1.850648 | -0.801731 |
| H | 0 | 1.489655  | 1.274641  | 1.346215  |
| H | 0 | 0.712344  | -0.839940 | 2.376667  |
| H | 0 | 3.526330  | 0.306217  | 0.086849  |
| H | 0 | 2.468479  | 1.237693  | -0.946392 |
| H | 0 | 0.479218  | -2.853245 | 0.956150  |
| H | 0 | 2.209036  | -0.658030 | -2.313886 |
| H | 0 | 3.275282  | -1.538654 | -1.243006 |
| H | 0 | 0.982054  | -2.682925 | -1.455974 |

#### TS-68+CH

B3LYP/6-31G(d) Geometry

|    |   |           |           |           |
|----|---|-----------|-----------|-----------|
| C  | 0 | 1.575284  | -0.915882 | -1.009498 |
| C  | 0 | 0.391505  | 0.020768  | -1.258875 |
| O  | 0 | 1.734951  | -1.114539 | 0.399816  |
| C  | 0 | 2.930338  | -0.260908 | -1.370789 |
| C  | 0 | 2.307406  | 0.112583  | 0.800331  |
| C  | 0 | 0.394668  | 1.167777  | -0.422660 |
| O  | 0 | 3.327910  | 0.389103  | -0.157246 |
| C  | 0 | 1.288301  | 1.274718  | 0.731415  |
| O  | 0 | 1.378014  | 2.221900  | 1.498039  |
| Cl | 0 | -0.305778 | 2.675194  | -1.001709 |
| H  | 0 | 1.429827  | -1.893344 | -1.475705 |
| H  | 0 | 0.207157  | 0.224796  | -2.315043 |
| H  | 0 | 2.851753  | 0.469570  | -2.182702 |
| H  | 0 | 3.680121  | -1.016788 | -1.632695 |
| H  | 0 | 2.744301  | 0.021066  | 1.795848  |
| C  | 0 | -1.178851 | -1.102463 | -1.048943 |
| C  | 0 | -1.012676 | -1.722058 | 0.207177  |
| C  | 0 | -2.358097 | -0.137651 | -1.190922 |
| C  | 0 | -1.227891 | -0.953105 | 1.365606  |
| C  | 0 | -2.630510 | 0.700019  | 0.089592  |
| C  | 0 | -1.779869 | 0.299102  | 1.258024  |
| H  | 0 | -1.040192 | -1.744903 | -1.920348 |
| H  | 0 | -0.499106 | -2.675194 | 0.287053  |
| H  | 0 | -3.239671 | -0.746635 | -1.424129 |
| H  | 0 | -2.203817 | 0.522199  | -2.050969 |
| H  | 0 | -0.821149 | -1.291503 | 2.315043  |
| H  | 0 | -2.509771 | 1.770014  | -0.105322 |
| H  | 0 | -3.680121 | 0.579194  | 0.397548  |
| H  | 0 | -1.776543 | 0.965473  | 2.117717  |

#### TS-69+CH

B3LYP/6-31G(d) Geometry

|   |   |          |           |           |
|---|---|----------|-----------|-----------|
| C | 0 | 1.453544 | 0.661650  | -0.962562 |
| C | 0 | 0.318836 | 0.538070  | 0.069313  |
| O | 0 | 1.738788 | -0.624142 | -1.520126 |
| C | 0 | 2.808105 | 0.987241  | -0.298223 |

|   |   |           |           |           |
|---|---|-----------|-----------|-----------|
| C | 0 | 2.399884  | -1.266839 | -0.452330 |
| C | 0 | 0.321245  | -0.632634 | 0.901178  |
| O | 0 | 3.289598  | -0.301364 | 0.109498  |
| C | 0 | 1.391720  | -1.643779 | 0.642922  |
| O | 0 | 1.539432  | -2.654878 | 1.310474  |
| C | 0 | -0.046784 | 1.795843  | 0.653274  |
| C | 0 | -0.107600 | -0.560506 | 2.354151  |
| N | 0 | -0.344476 | 2.836250  | 1.086766  |
| H | 0 | 1.196466  | 1.342166  | -1.775913 |
| H | 0 | 2.724888  | 1.644804  | 0.571506  |
| H | 0 | 3.503629  | 1.425193  | -1.024363 |
| H | 0 | 2.955710  | -2.133091 | -0.816322 |
| H | 0 | -0.932472 | 0.137156  | 2.511888  |
| H | 0 | 0.736223  | -0.209612 | 2.962815  |
| H | 0 | -0.382710 | -1.547461 | 2.732434  |
| C | 0 | -1.466065 | 0.399754  | -1.258080 |
| C | 0 | -1.105761 | -0.746172 | -1.976731 |
| C | 0 | -2.536785 | 0.288986  | -0.190876 |
| C | 0 | -1.024236 | -1.952689 | -1.278889 |
| C | 0 | -2.521739 | -1.094437 | 0.518259  |
| C | 0 | -1.358998 | -1.955804 | 0.075897  |
| H | 0 | -1.392126 | 1.370358  | -1.745621 |
| H | 0 | -0.659125 | -0.662147 | -2.962815 |
| H | 0 | -3.503629 | 0.433464  | -0.689441 |
| H | 0 | -2.446851 | 1.112536  | 0.523944  |
| H | 0 | -0.495849 | -2.795245 | -1.717532 |
| H | 0 | -2.539941 | -0.986073 | 1.605235  |
| H | 0 | -3.434634 | -1.648443 | 0.261206  |
| H | 0 | -1.139896 | -2.836250 | 0.674600  |

#### TS-70+CH

B3LYP/6-31G(d) Geometry

|   |   |           |           |           |
|---|---|-----------|-----------|-----------|
| C | 0 | -1.481108 | -1.112873 | -0.618205 |
| C | 0 | -0.354948 | -0.734958 | 0.357911  |
| O | 0 | -1.609808 | -0.134432 | -1.656091 |
| C | 0 | -2.892975 | -1.018699 | 0.013989  |
| C | 0 | -2.218444 | 0.934416  | -0.969243 |
| C | 0 | -0.313717 | 0.659169  | 0.695415  |
| O | 0 | -3.267740 | 0.348024  | -0.191913 |
| C | 0 | -1.232332 | 1.589520  | 0.011223  |
| O | 0 | -1.336950 | 2.783508  | 0.275554  |
| C | 0 | -0.214091 | -1.760666 | 1.480735  |
| C | 0 | 0.172673  | 1.148224  | 2.040056  |
| H | 0 | -1.296398 | -2.082088 | -1.089589 |
| H | 0 | -2.921161 | -1.252968 | 1.081831  |
| H | 0 | -3.598187 | -1.671806 | -0.515028 |
| H | 0 | -2.636052 | 1.653147  | -1.676491 |
| H | 0 | -0.233443 | -2.783508 | 1.086275  |
| H | 0 | -1.035613 | -1.668730 | 2.202050  |
| H | 0 | 0.711247  | -1.642452 | 2.047909  |
| H | 0 | 1.048021  | 0.608108  | 2.407989  |
| H | 0 | -0.620243 | 1.024250  | 2.793353  |
| H | 0 | 0.397214  | 2.216520  | 1.997848  |
| C | 0 | 1.317803  | -1.190220 | -0.728057 |
| C | 0 | 1.115820  | -0.526281 | -1.955612 |
| C | 0 | 2.473606  | -0.675507 | 0.127011  |
| C | 0 | 1.188935  | 0.870869  | -1.957735 |
| C | 0 | 2.605558  | 0.873655  | 0.100128  |
| C | 0 | 1.585977  | 1.518598  | -0.801435 |
| H | 0 | 1.224750  | -2.276807 | -0.733711 |
| H | 0 | 0.655124  | -1.040491 | -2.793353 |
| H | 0 | 3.389835  | -1.124427 | -0.274939 |
| H | 0 | 2.395260  | -1.041109 | 1.155160  |

|     |          |          |           |
|-----|----------|----------|-----------|
| H O | 0.737712 | 1.430247 | -2.773362 |
| H O | 2.557872 | 1.300348 | 1.105281  |
| H O | 3.598187 | 1.149333 | -0.284841 |
| H O | 1.436860 | 2.590823 | -0.701315 |

#### P-1+CH

B3LYP/6-31G(d) Geometry

|     |           |           |           |
|-----|-----------|-----------|-----------|
| C O | -0.361530 | 0.540020  | 1.169894  |
| C O | -1.004498 | -0.633499 | 1.146245  |
| C O | -1.343160 | -1.132146 | -0.240541 |
| C O | -0.016205 | -1.266188 | -1.036201 |
| C O | -0.117168 | 1.141976  | -0.194620 |
| C O | 0.714203  | 0.120027  | -1.049144 |
| C O | 2.096303  | 0.022127  | -0.568513 |
| N O | 3.191334  | -0.051738 | -0.188199 |
| C O | -1.484878 | 1.307281  | -0.912101 |
| C O | -2.220837 | -0.061467 | -0.946307 |
| H O | -0.032693 | 1.039600  | 2.076522  |
| H O | -1.260018 | -1.203209 | 2.035792  |
| H O | -1.858877 | -2.097333 | -0.219426 |
| H O | -0.221359 | -1.587557 | -2.063690 |
| H O | 0.618192  | -2.028018 | -0.575797 |
| H O | 0.412190  | 2.097333  | -0.143387 |
| H O | 0.762332  | 0.502955  | -2.076522 |
| H O | -1.323106 | 1.694358  | -1.925969 |
| H O | -2.075975 | 2.056557  | -0.376571 |
| H O | -2.416742 | -0.375243 | -1.979108 |
| H O | -3.191334 | 0.005567  | -0.444443 |

#### P-2+CH

B3LYP/6-31G(d) Geometry

|     |           |           |           |
|-----|-----------|-----------|-----------|
| C O | -1.349782 | -1.022538 | 0.851246  |
| C O | -0.612476 | 0.002042  | 1.298356  |
| C O | -0.089499 | 0.914301  | 0.212034  |
| C O | 0.776602  | 0.078522  | -0.798148 |
| C O | -1.487786 | -1.078343 | -0.652520 |
| C O | -0.056662 | -1.156973 | -1.254403 |
| C O | 2.087082  | -0.329937 | -0.162396 |
| O O | 3.171828  | 0.110075  | -0.476167 |
| C O | -1.309323 | 1.449958  | -0.591230 |
| C O | -2.134249 | 0.250455  | -1.135737 |
| H O | -1.810942 | -1.766031 | 1.496502  |
| H O | -0.408933 | 0.193439  | 2.348837  |
| H O | 0.500448  | 1.745688  | 0.610185  |
| H O | 1.027667  | 0.722790  | -1.647788 |
| H O | -2.081951 | -1.936467 | -0.982682 |
| H O | 0.420653  | -2.089519 | -0.928111 |
| H O | -0.106316 | -1.192099 | -2.348837 |
| H O | 1.993491  | -1.083368 | 0.653594  |
| H O | -0.955076 | 2.089519  | -1.408516 |
| H O | -1.919992 | 2.077493  | 0.066151  |
| H O | -2.162028 | 0.259986  | -2.232454 |
| H O | -3.171828 | 0.302202  | -0.790221 |

#### P-3+CH

B3LYP/6-31G(d) Geometry

|     |           |           |           |
|-----|-----------|-----------|-----------|
| C O | -2.418823 | -1.145331 | -0.672574 |
| C O | -1.090691 | 0.803921  | 0.385554  |
| C O | -1.517277 | -0.264106 | 1.366143  |
| C O | -2.214857 | -1.268096 | 0.819558  |
| C O | -1.017361 | -1.071879 | -1.338360 |
| C O | -0.223954 | 0.145557  | -0.754844 |
| C O | 1.094799  | -0.289995 | -0.220961 |

|     |           |           |           |
|-----|-----------|-----------|-----------|
| O O | 2.159028  | 0.185921  | -0.626131 |
| C O | -2.363867 | 1.363120  | -0.310361 |
| C O | -3.153424 | 0.193637  | -0.961104 |
| H O | -2.980132 | -1.988884 | -1.085750 |
| H O | -0.528341 | 1.612690  | 0.861510  |
| H O | -1.279244 | -0.190788 | 2.423877  |
| H O | -2.606714 | -2.110927 | 1.382757  |
| H O | -0.480728 | -2.011719 | -1.164189 |
| H O | -1.110884 | -0.957782 | -2.423877 |
| H O | -0.033126 | 0.897319  | -1.527299 |
| H O | 1.128924  | -1.059252 | 0.563732  |
| H O | -2.073583 | 2.110927  | -1.057802 |
| H O | -2.972999 | 1.878585  | 0.438557  |
| H O | -3.236904 | 0.333350  | -2.045702 |
| H O | -4.172925 | 0.145289  | -0.566197 |
| B O | 3.607686  | -0.265073 | -0.055790 |
| H O | 3.366082  | -1.106412 | 0.785973  |
| H O | 4.172925  | -0.673552 | -1.042200 |
| H O | 4.065119  | 0.769291  | 0.369245  |

#### P-4+CH

B3LYP/6-31G(d) Geometry

|     |           |           |           |
|-----|-----------|-----------|-----------|
| C O | -0.876496 | -1.113108 | 0.975948  |
| C O | -0.188725 | -0.031569 | 1.361186  |
| C O | 0.101019  | 0.949130  | 0.248018  |
| C O | 0.877148  | 0.203123  | -0.876948 |
| C O | -1.220789 | -1.141854 | -0.495550 |
| C O | 0.106759  | -1.057889 | -1.302092 |
| C O | -2.054596 | 0.129486  | -0.820500 |
| N O | 2.289747  | -0.091709 | -0.370677 |
| O O | 3.014931  | 0.892847  | -0.242265 |
| O O | 2.614995  | -1.242449 | -0.101541 |
| C O | -1.248869 | 1.387242  | -0.389935 |
| H O | -1.163833 | -1.918901 | 1.646003  |
| H O | 0.150782  | 0.149780  | 2.376799  |
| H O | 0.679837  | 1.815225  | 0.575807  |
| H O | 1.060720  | 0.892475  | -1.703982 |
| H O | -1.769817 | -2.045508 | -0.776670 |
| H O | 0.723008  | -1.938211 | -1.110023 |
| H O | -0.105717 | -1.021665 | -2.376799 |
| H O | -2.275402 | 0.155709  | -1.894676 |
| H O | -3.014931 | 0.084112  | -0.297398 |
| H O | -1.053861 | 2.045508  | -1.245640 |
| H O | -1.804462 | 1.977109  | 0.345274  |

#### P-5+CH

B3LYP/6-31G(d) Geometry

|     |           |           |           |
|-----|-----------|-----------|-----------|
| C O | -1.092218 | -0.529247 | 1.187240  |
| C O | -0.418464 | 0.626223  | 1.211260  |
| C O | 0.004999  | 1.128869  | -0.151225 |
| C O | 0.884705  | 0.052015  | -0.858953 |
| C O | -1.255995 | -1.123063 | -0.193134 |
| C O | 0.165562  | -1.325150 | -0.789193 |
| C O | 2.298259  | -0.008735 | -0.314113 |
| F O | 2.356104  | -0.371056 | 0.986344  |
| F O | 3.045564  | -0.903312 | -1.006185 |
| F O | 2.919339  | 1.191715  | -0.419138 |
| C O | -1.278602 | 1.274715  | -1.017533 |
| C O | -2.009711 | -0.095894 | -1.084853 |
| H O | -1.477050 | -1.027298 | 2.073411  |
| H O | -0.192195 | 1.183781  | 2.115737  |
| H O | 0.544658  | 2.078140  | -0.099460 |
| H O | 1.009375  | 0.357103  | -1.904965 |

H O -1.790417 -2.078140 -0.173457  
H O 0.727500 -2.021856 -0.160069  
H O 0.099484 -1.770732 -1.788101  
H O -1.009165 1.627976 -2.020729  
H O -1.922321 2.039117 -0.571271  
H O -2.046609 -0.469929 -2.115737  
H O -3.045564 -0.001795 -0.743358

#### P-6+CH

B3LYP/6-31G(d) Geometry

C O -0.810255 -0.207944 1.383678  
C O -1.554709 -1.215560 0.910116  
C O -1.887647 -1.103608 -0.559806  
C O -0.547644 -1.029247 -1.346645  
C O -0.469244 0.849254 0.358166  
C O 0.311576 0.168644 -0.841013  
C O -2.647877 0.232941 -0.787005  
B O 1.810141 -0.105149 -0.390186  
C O 2.343672 -1.562149 -0.092233  
C O 2.798650 1.120656 -0.234737  
C O -1.807657 1.404371 -0.207390  
H O -0.480717 -0.128904 2.417323  
H O -1.896940 -2.053347 1.513172  
H O -2.488978 -1.948788 -0.911708  
H O -0.765516 -0.919270 -2.417323  
H O -0.017092 -1.980302 -1.230940  
H O 0.120998 1.665000 0.787699  
H O 0.350653 0.941035 -1.626015  
H O -3.632071 0.185847 -0.308553  
H O -2.821989 0.369255 -1.861853  
H O 2.348842 -2.154478 -1.020683  
H O 3.355156 -1.600448 0.328048  
H O 1.663023 -2.096978 0.585131  
H O 3.632071 0.993549 -0.944203  
H O 2.361177 2.110265 -0.411371  
H O 3.273112 1.123270 0.757339  
H O -1.591932 2.154478 -0.978224  
H O -2.353578 1.915604 0.593721

#### P-7+CH

B3LYP/6-31G(d) Geometry

C O 0.463619 0.307280 1.399170  
C O 1.208964 1.289797 0.878488  
C O 1.541785 1.110480 -0.584663  
C O 0.202786 1.011402 -1.368917  
C O 0.120758 -0.795350 0.424870  
C O -0.654920 -0.163545 -0.808614  
B O -2.138668 0.147677 -0.403133  
Cl O -3.279530 -1.196774 -0.185833  
Cl O -2.766124 1.773355 -0.108852  
C O 1.450611 -1.379182 -0.129000  
C O 2.297632 -0.236563 -0.753941  
H O 0.128921 0.277505 2.433058  
H O 1.546955 2.157020 1.440081  
H O 2.142728 1.937866 -0.975781  
H O 0.413442 0.847152 -2.433058  
H O -0.328585 1.964152 -1.291547  
H O -0.476445 -1.588583 0.883224  
H O -0.711882 -0.966895 -1.557267  
H O 1.226574 -2.157020 -0.869269  
H O 1.992402 -1.863888 0.690302  
H O 2.475665 -0.419115 -1.821108  
H O 3.279530 -0.172807 -0.273551

#### P-8+CH

B3LYP/6-31G(d) Geometry

C O -1.780145 1.230256 0.164502  
C O -1.040990 1.228889 -0.951497  
C O -0.146638 0.014034 -1.110539  
C O 0.823424 -0.026576 0.124337  
C O -1.546296 0.035783 1.061603  
C O -0.037988 -0.000744 1.427314  
C O 1.750813 1.191687 0.078855  
O O 2.948678 1.182491 -0.049472  
Cl O 1.863495 -1.527086 0.054263  
C O -1.070813 -1.236484 -1.076700  
C O -1.872279 -1.251053 0.251884  
H O -2.493001 2.009981 0.419314  
H O -1.078818 2.002907 -1.713274  
H O 0.439928 0.040032 -2.032853  
H O -2.144400 0.078229 1.977103  
H O 0.217268 0.879337 2.029822  
H O 0.191567 -0.881026 2.032853  
H O 1.187073 2.144344 0.176440  
H O -0.473776 -2.144344 -1.190702  
H O -1.742873 -1.177357 -1.938660  
H O -1.609542 -2.128879 0.853902  
H O -2.948678 -1.302701 0.059518

#### P-9+CH

B3LYP/6-31G(d) Geometry

C O 1.519191 -1.516494 0.142860  
C O 0.789123 -1.380040 -0.970813  
C O 0.128469 -0.025762 -1.121515  
C O -0.828869 0.233028 0.111391  
C O 1.500781 -0.303542 1.044293  
C O 0.020257 -0.006262 1.409032  
C O -1.940429 -0.809637 0.052192  
O O -3.121161 -0.563203 -0.066042  
C O -1.457448 1.633421 0.077672  
C O 1.273369 1.028485 -1.098850  
C O 2.048290 0.911151 0.242108  
H O 2.077076 -2.413680 0.398740  
H O 0.689365 -2.149542 -1.732132  
H O -0.444008 0.054869 -2.051705  
H O 2.086429 -0.455692 1.956739  
H O -0.380922 -0.843824 1.993339  
H O -0.037659 0.880501 2.051705  
H O -1.589846 -1.862696 0.126817  
H O -1.950073 1.825187 -0.881330  
H O -0.709908 2.413680 0.247012  
H O -2.222301 1.722042 0.855258  
H O 0.873119 2.036843 -1.241600  
H O 1.935375 0.829595 -1.947937  
H O 1.929151 1.820658 0.844340  
H O 3.121161 0.785908 0.063080

#### P-10+CH

B3LYP/6-31G(d) Geometry

C O -1.473743 -0.923563 -1.430746  
C O -0.851718 -1.915893 -0.781784  
C O -0.254747 -1.510745 0.547658  
C O 0.762760 -0.337964 0.336565  
C O -1.416874 0.410933 -0.723475  
C O 0.094773 0.768954 -0.547657  
C O 2.046515 -0.821939 -0.296204



|     |           |           |           |
|-----|-----------|-----------|-----------|
| O 0 | 3.150899  | -0.680373 | 0.183642  |
| C 0 | 0.354269  | 2.177084  | -0.000173 |
| C 0 | -1.404718 | -0.937682 | 1.424604  |
| C 0 | -2.079259 | 0.243145  | 0.673246  |
| H 0 | -1.971613 | -1.042525 | -2.389823 |
| H 0 | -0.793322 | -2.938908 | -1.144418 |
| H 0 | 0.233131  | -2.347133 | 1.058812  |
| H 0 | 1.029700  | 0.072460  | 1.317598  |
| H 0 | -1.917874 | 1.201536  | -1.292739 |
| H 0 | 0.536689  | 0.725089  | -1.553029 |
| H 0 | 1.915243  | -1.331064 | -1.279325 |
| H 0 | 1.430697  | 2.376492  | 0.054157  |
| H 0 | -0.053709 | 2.309061  | 1.008536  |
| H 0 | -0.095744 | 2.938908  | -0.648031 |
| H 0 | -0.999119 | -0.611076 | 2.389823  |
| H 0 | -2.127206 | -1.733742 | 1.632368  |
| H 0 | -1.987402 | 1.174103  | 1.243683  |
| H 0 | -3.150899 | 0.060827  | 0.543440  |

#### P-11+CH

B3LYP/6-31G(d) Geometry

|     |           |           |           |
|-----|-----------|-----------|-----------|
| C 0 | 0.512074  | -2.062173 | 0.315833  |
| C 0 | 0.831777  | -1.225718 | 1.309985  |
| C 0 | 0.890027  | 0.229674  | 0.909084  |
| C 0 | -0.531179 | 0.606794  | 0.354724  |
| C 0 | 0.273863  | -1.382763 | -1.014204 |
| C 0 | -0.880185 | -0.337394 | -0.835307 |
| C 0 | 1.923337  | 0.382318  | -0.240348 |
| C 0 | 1.555395  | -0.590123 | -1.395293 |
| C 0 | -0.599841 | 2.019788  | -0.028943 |
| C 0 | -2.211043 | -1.042506 | -0.641181 |
| N 0 | -0.632294 | 3.139714  | -0.336288 |
| O 0 | -2.922417 | -0.943228 | 0.332706  |
| H 0 | 0.429965  | -3.139714 | 0.428451  |
| H 0 | 1.036118  | -1.540946 | 2.329363  |
| H 0 | 1.139619  | 0.885607  | 1.747268  |
| H 0 | -1.276647 | 0.440389  | 1.141029  |
| H 0 | 0.010907  | -2.092547 | -1.805684 |
| H 0 | -0.961494 | 0.225654  | -1.775826 |
| H 0 | 2.922417  | 0.164942  | 0.149269  |
| H 0 | 1.932969  | 1.421224  | -0.587571 |
| H 0 | 2.367967  | -1.298649 | -1.584310 |
| H 0 | 1.382038  | -0.042475 | -2.329363 |
| H 0 | -2.502152 | -1.700177 | -1.490596 |

#### P-12+CH

B3LYP/6-31G(d) Geometry

|      |           |           |           |
|------|-----------|-----------|-----------|
| C 0  | 2.349592  | -0.235836 | 1.080539  |
| C 0  | 3.118660  | 0.860125  | 0.290810  |
| C 0  | 1.080945  | 0.289488  | -1.110375 |
| C 0  | 1.494732  | -1.161142 | -0.956909 |
| C 0  | 2.163309  | -1.429708 | 0.171246  |
| C 0  | 0.947953  | 0.325261  | 1.435380  |
| C 0  | 0.160970  | 0.654249  | 0.116956  |
| C 0  | -1.084659 | -0.187975 | 0.067230  |
| O 0  | -2.227917 | 0.255178  | 0.031815  |
| Cl 0 | -0.314014 | 2.411299  | 0.053878  |
| C 0  | 2.374872  | 1.148812  | -1.039679 |
| H 0  | 2.879503  | -0.492304 | 2.002662  |
| H 0  | 4.143156  | 0.525028  | 0.102077  |
| H 0  | 3.183582  | 1.766330  | 0.904216  |
| H 0  | 0.536946  | 0.479019  | -2.039315 |
| H 0  | 1.273710  | -1.892800 | -1.729097 |

|     |           |           |           |
|-----|-----------|-----------|-----------|
| H 0 | 2.553819  | -2.411299 | 0.425200  |
| H 0 | 0.394726  | -0.402874 | 2.039315  |
| H 0 | 1.032090  | 1.236621  | 2.032488  |
| H 0 | -0.934830 | -1.275855 | 0.072758  |
| H 0 | 2.124829  | 2.208021  | -1.135351 |
| H 0 | 2.993527  | 0.881988  | -1.901810 |
| B 0 | -3.546941 | -0.708289 | -0.003202 |
| H 0 | -4.085445 | -0.380286 | -1.031774 |
| H 0 | -3.099703 | -1.836781 | 0.014470  |
| H 0 | -4.143156 | -0.372750 | 0.990596  |

#### P-13+CH

B3LYP/6-31G(d) Geometry

|     |           |           |           |
|-----|-----------|-----------|-----------|
| C 0 | 2.343754  | -0.467836 | 1.070084  |
| C 0 | 1.076866  | 0.087553  | -1.109588 |
| C 0 | 1.427205  | -1.376084 | -0.947419 |
| C 0 | 2.095655  | -1.661926 | 0.176683  |
| C 0 | 0.969771  | 0.156873  | 1.430603  |
| C 0 | 0.185171  | 0.552596  | 0.120873  |
| C 0 | -1.075001 | -0.258476 | 0.080957  |
| O 0 | -2.198158 | 0.248492  | 0.018556  |
| C 0 | -0.149366 | 2.051216  | 0.074498  |
| C 0 | 2.417350  | 0.876972  | -1.074673 |
| C 0 | 3.150988  | 0.586552  | 0.262219  |
| H 0 | 2.875831  | -0.738702 | 1.987284  |
| H 0 | 0.540201  | 0.287196  | -2.042607 |
| H 0 | 1.167628  | -2.108966 | -1.706770 |
| H 0 | 2.440714  | -2.657745 | 0.441669  |
| H 0 | 0.396090  | -0.550515 | 2.040959  |
| H 0 | 1.108976  | 1.055324  | 2.042607  |
| H 0 | -0.999624 | -1.353678 | 0.111496  |
| H 0 | 0.748819  | 2.657745  | 0.214880  |
| H 0 | -0.857716 | 2.310148  | 0.867086  |
| H 0 | -0.609698 | 2.328286  | -0.879525 |
| H 0 | 2.239286  | 1.947998  | -1.209859 |
| H 0 | 3.019628  | 0.550217  | -1.928127 |
| H 0 | 3.250840  | 1.499656  | 0.862212  |
| H 0 | 4.163799  | 0.214826  | 0.078004  |
| B 0 | -3.568077 | -0.621699 | -0.019247 |
| H 0 | -4.074436 | -0.284527 | -1.062969 |
| H 0 | -3.204848 | -1.779458 | 0.027274  |
| H 0 | -4.163799 | -0.231826 | 0.956661  |

#### P-14+CH

B3LYP/6-31G(d) Geometry

|     |           |           |           |
|-----|-----------|-----------|-----------|
| C 0 | 2.383958  | 0.293295  | 0.778608  |
| C 0 | 1.113433  | -1.415356 | -0.681456 |
| C 0 | 1.547538  | -1.949524 | 0.664695  |
| C 0 | 2.218310  | -1.067130 | 1.415765  |
| C 0 | 0.951648  | 0.853970  | 0.504267  |
| C 0 | 0.218360  | -0.141530 | -0.473600 |
| C 0 | -1.111336 | -0.500325 | 0.084706  |
| O 0 | -2.168267 | -0.130966 | -0.436297 |
| C 0 | 0.917390  | 2.292183  | -0.025205 |
| C 0 | 2.380577  | -0.931675 | -1.441461 |
| C 0 | 3.140875  | 0.101660  | -0.565724 |
| H 0 | 2.925178  | 0.989674  | 1.427638  |
| H 0 | 0.574483  | -2.160373 | -1.274901 |
| H 0 | 1.341113  | -2.973756 | 0.963217  |
| H 0 | 2.615083  | -1.288357 | 2.403103  |
| H 0 | 0.429893  | 0.849066  | 1.470492  |
| H 0 | 0.052166  | 0.341392  | -1.442882 |
| H 0 | -1.162085 | -1.101329 | 1.004079  |



|     |           |           |           |
|-----|-----------|-----------|-----------|
| H O | -0.116053 | 2.635851  | -0.146500 |
| H O | 1.411951  | 2.383263  | -0.998562 |
| H O | 1.416657  | 2.973756  | 0.673115  |
| H O | 2.084370  | -0.495761 | -2.403103 |
| H O | 3.011071  | -1.798140 | -1.663447 |
| H O | 3.236253  | 1.061522  | -1.084498 |
| H O | 4.158499  | -0.241606 | -0.355371 |
| B O | -3.627995 | -0.489857 | 0.169481  |
| H O | -3.402786 | -1.151061 | 1.163113  |
| H O | -4.111065 | 0.597999  | 0.377280  |
| H O | -4.158499 | -1.088790 | -0.735722 |

#### P-15+CH

B3LYP/6-31G(d) Geometry

|     |           |           |           |
|-----|-----------|-----------|-----------|
| C O | -2.535957 | -0.173112 | -0.874038 |
| C O | -0.873506 | -1.423640 | 0.663612  |
| C O | -1.216511 | -2.157121 | -0.612507 |
| C O | -2.084728 | -1.513856 | -1.402631 |
| C O | -1.239993 | 0.700042  | -0.703319 |
| C O | -0.264950 | -0.013296 | 0.304407  |
| C O | 1.098931  | -0.188155 | -0.276239 |
| O O | 2.115385  | 0.065897  | 0.371595  |
| C O | -1.555578 | 2.062796  | -0.262907 |
| N O | -1.831689 | 3.133171  | 0.092653  |
| C O | -2.192193 | -1.146793 | 1.439283  |
| C O | -3.180340 | -0.374390 | 0.523614  |
| H O | -3.224194 | 0.336943  | -1.552726 |
| H O | -0.165059 | -1.971988 | 1.290555  |
| H O | -0.795392 | -3.133171 | -0.836557 |
| H O | -2.450035 | -1.901557 | -2.349372 |
| H O | -0.762639 | 0.782511  | -1.687468 |
| H O | -0.162494 | 0.564747  | 1.227056  |
| H O | 1.209005  | -0.591733 | -1.293314 |
| H O | -1.969370 | -0.578258 | 2.349372  |
| H O | -2.615841 | -2.105119 | 1.754243  |
| H O | -3.435596 | 0.601123  | 0.951451  |
| H O | -4.116939 | -0.926600 | 0.405023  |
| B O | 3.618072  | -0.187910 | -0.196485 |
| H O | 4.070315  | -0.970775 | 0.604430  |
| H O | 3.453406  | -0.628295 | -1.315470 |
| H O | 4.116939  | 0.908944  | -0.137213 |

#### P-16+CH

B3LYP/6-31G(d) Geometry

|     |           |           |           |
|-----|-----------|-----------|-----------|
| C O | 0.712862  | -1.317777 | -0.981580 |
| C O | 1.428795  | -1.382896 | 0.146814  |
| C O | 1.265605  | -0.189064 | 1.059583  |
| C O | -0.232539 | -0.064341 | 1.439782  |
| C O | -0.109986 | -0.059174 | -1.125625 |
| C O | -1.102605 | -0.009001 | 0.117968  |
| C O | -2.026733 | -1.156710 | 0.050628  |
| C O | -1.908535 | 1.226004  | 0.075550  |
| N O | -2.740939 | -2.069776 | -0.003498 |
| N O | -2.511837 | 2.216970  | 0.036989  |
| C O | 0.833618  | 1.169225  | -1.033804 |
| C O | 1.670505  | 1.087389  | 0.272493  |
| H O | 0.699601  | -2.087162 | -1.747325 |
| H O | 2.074739  | -2.216970 | 0.406372  |
| H O | 1.859221  | -0.281707 | 1.974120  |
| H O | -0.402919 | 0.843537  | 2.026353  |
| H O | -0.549928 | -0.915716 | 2.046101  |
| H O | -0.697927 | -0.038265 | -2.046101 |
| H O | 0.248022  | 2.093490  | -1.074793 |

|     |          |          |           |
|-----|----------|----------|-----------|
| H O | 1.480617 | 1.162778 | -1.915860 |
| H O | 1.501086 | 1.970855 | 0.899185  |
| H O | 2.740939 | 1.053014 | 0.048185  |

#### P-17+CH

B3LYP/6-31G(d) Geometry

|     |           |           |           |
|-----|-----------|-----------|-----------|
| C O | 0.554564  | -0.668905 | 1.177817  |
| C O | 0.554566  | 0.668911  | 1.177815  |
| C O | 0.636209  | 1.291582  | -0.196202 |
| C O | -0.590849 | 0.790944  | -1.038654 |
| C O | 0.636208  | -1.291582 | -0.196197 |
| C O | -0.590849 | -0.790945 | -1.038652 |
| C O | -1.833766 | 1.399010  | -0.554784 |
| C O | -1.833767 | -1.399010 | -0.554783 |
| N O | -2.793053 | -1.933925 | -0.179320 |
| N O | -2.793051 | 1.933926  | -0.179318 |
| C O | 1.916828  | -0.776752 | -0.905913 |
| C O | 1.916828  | 0.776747  | -0.905918 |
| H O | 0.489231  | -1.279512 | 2.073113  |
| H O | 0.489234  | 1.279522  | 2.073107  |
| H O | 0.622653  | 2.383999  | -0.163547 |
| H O | -0.458460 | 1.130429  | -2.073113 |
| H O | 0.622650  | -2.383999 | -0.163537 |
| H O | -0.458458 | -1.130432 | -2.073110 |
| H O | 1.955029  | -1.171506 | -1.928529 |
| H O | 2.793052  | -1.168275 | -0.380965 |
| H O | 1.955026  | 1.171495  | -1.928537 |
| H O | 2.793053  | 1.168273  | -0.380974 |

#### P-18+CH

B3LYP/6-31G(d) Geometry

|     |           |           |           |
|-----|-----------|-----------|-----------|
| C O | -0.616880 | -1.851506 | 0.456134  |
| C O | 0.330593  | -1.595909 | 1.365292  |
| C O | 1.395043  | -0.627357 | 0.904816  |
| C O | 0.658508  | 0.712314  | 0.543182  |
| C O | -0.428810 | -1.130068 | -0.858376 |
| C O | -0.405981 | 0.413765  | -0.585451 |
| C O | 1.599859  | 1.756792  | 0.127201  |
| C O | -1.731376 | 0.918390  | -0.215643 |
| N O | -2.785618 | 1.306071  | 0.078238  |
| N O | 2.362805  | 2.565673  | -0.208061 |
| C O | 0.965071  | -1.503362 | -1.433332 |
| C O | 2.062312  | -1.189727 | -0.378967 |
| H O | -1.457269 | -2.519005 | 0.621179  |
| H O | 0.353806  | -2.029374 | 2.361073  |
| H O | 2.142317  | -0.425354 | 1.676714  |
| H O | 0.143098  | 1.071192  | 1.439266  |
| H O | -1.220152 | -1.354984 | -1.578094 |
| H O | -0.108392 | 0.921433  | -1.510146 |
| H O | 1.140687  | -0.945657 | -2.361073 |
| H O | 0.964547  | -2.565673 | -1.694818 |
| H O | 2.785618  | -0.463191 | -0.765054 |
| H O | 2.623432  | -2.091785 | -0.118028 |

#### P-19+CH

B3LYP/6-31G(d) Geometry

|     |           |           |           |
|-----|-----------|-----------|-----------|
| C O | 0.459258  | -1.955817 | 0.610452  |
| C O | 1.099173  | -1.087198 | 1.401739  |
| C O | 1.354303  | 0.262508  | 0.768343  |
| C O | -0.036772 | 0.862220  | 0.387158  |
| C O | 0.148394  | -1.423156 | -0.769973 |
| C O | -0.718817 | -0.123530 | -0.630676 |
| C O | 0.018550  | 2.296603  | -0.149187 |

|     |           |           |           |
|-----|-----------|-----------|-----------|
| C O | -2.100565 | -0.431586 | -0.249957 |
| N O | -3.194883 | -0.676442 | 0.053493  |
| C O | 1.484188  | -0.988263 | -1.432932 |
| C O | 2.204632  | 0.036583  | -0.513235 |
| H O | 0.185188  | -2.965069 | 0.903762  |
| H O | 1.405274  | -1.306215 | 2.421358  |
| H O | 1.867499  | 0.947543  | 1.451661  |
| H O | -0.635499 | 0.872063  | 1.303981  |
| H O | -0.375008 | -2.152672 | -1.394059 |
| H O | -0.762197 | 0.352588  | -1.619764 |
| H O | 0.578397  | 2.365117  | -1.089206 |
| H O | -0.991397 | 2.678815  | -0.337194 |
| H O | 0.497203  | 2.965069  | 0.575905  |
| H O | 1.280453  | -0.557214 | -2.421358 |
| H O | 2.104942  | -1.875008 | -1.593894 |
| H O | 2.362952  | 0.987365  | -1.034098 |
| H O | 3.194883  | -0.329657 | -0.224634 |

#### P-20+CH

B3LYP/6-31G(d) Geometry

|     |           |           |           |
|-----|-----------|-----------|-----------|
| C O | 0.422851  | -1.360262 | -0.971449 |
| C O | 1.087409  | -1.625772 | 0.158945  |
| C O | 1.285110  | -0.427082 | 1.060283  |
| C O | -0.109851 | 0.152054  | 1.417932  |
| C O | 0.007927  | 0.087426  | -1.122334 |
| C O | -0.920046 | 0.453516  | 0.102969  |
| C O | -2.116226 | -0.407834 | 0.039594  |
| C O | -1.409331 | 1.919399  | 0.057690  |
| N O | -3.075966 | -1.060335 | -0.012748 |
| C O | 1.298437  | 0.950343  | -1.062620 |
| C O | 2.058050  | 0.657394  | 0.260100  |
| H O | 0.185189  | -2.099810 | -1.730476 |
| H O | 1.458443  | -2.611000 | 0.428387  |
| H O | 1.823785  | -0.682248 | 1.978426  |
| H O | 0.011797  | 1.080290  | 1.989553  |
| H O | -0.656717 | -0.549195 | 2.053914  |
| H O | -0.536711 | 0.268868  | -2.053914 |
| H O | -1.922087 | 2.135417  | -0.885684 |
| H O | -2.109662 | 2.113917  | 0.876189  |
| H O | -0.568365 | 2.611000  | 0.163006  |
| H O | 1.056786  | 2.014155  | -1.156124 |
| H O | 1.915276  | 0.695760  | -1.930180 |
| H O | 2.146558  | 1.564482  | 0.871253  |
| H O | 3.075966  | 0.310180  | 0.056081  |

#### P-21+CH

B3LYP/6-31G(d) Geometry

|     |           |           |           |
|-----|-----------|-----------|-----------|
| C O | 1.208436  | -1.315184 | -1.426334 |
| C O | 2.008414  | -0.453551 | -0.786433 |
| C O | 1.456441  | 0.048178  | 0.530362  |
| C O | 0.071017  | 0.745462  | 0.282654  |
| C O | -0.098196 | -1.594798 | -0.715793 |
| C O | -0.805399 | -0.209344 | -0.575187 |
| C O | 0.274353  | 2.097505  | -0.375960 |
| O O | 0.317676  | 3.143667  | 0.230050  |
| C O | -2.232456 | -0.267653 | -0.060488 |
| F O | -2.814102 | 0.951621  | -0.146469 |
| F O | -2.325125 | -0.653146 | 1.235397  |
| F O | -2.985627 | -1.126302 | -0.784253 |
| C O | 1.178740  | -1.186044 | 1.435192  |
| C O | 0.244710  | -2.175980 | 0.685874  |
| H O | 1.452296  | -1.787039 | -2.374382 |
| H O | 2.985627  | -0.145831 | -1.148826 |
| H O | 2.129880  | 0.749678  | 1.030902  |

|     |           |           |           |
|-----|-----------|-----------|-----------|
| H O | -0.386079 | 0.935852  | 1.258735  |
| H O | -0.738709 | -2.280083 | -1.276802 |
| H O | -0.906892 | 0.201580  | -1.587926 |
| H O | 0.420919  | 2.070094  | -1.480609 |
| H O | 0.723219  | -0.851439 | 2.374382  |
| H O | 2.131302  | -1.661950 | 1.689134  |
| H O | -0.670175 | -2.360573 | 1.254086  |
| H O | 0.736433  | -3.143667 | 0.546620  |

#### P-22+CH

B3LYP/6-31G(d) Geometry

|     |           |           |           |
|-----|-----------|-----------|-----------|
| C O | 0.734750  | -1.903265 | 0.908450  |
| C O | 1.553818  | -0.962784 | 1.395586  |
| C O | 1.926162  | 0.111288  | 0.398424  |
| C O | 0.591681  | 0.777000  | -0.072901 |
| C O | 0.376824  | -1.719922 | -0.549743 |
| C O | -0.309267 | -0.305870 | -0.746084 |
| B O | -1.832677 | -0.410315 | -0.306980 |
| C O | -2.366216 | 0.232618  | 1.034487  |
| C O | -2.844132 | -1.190746 | -1.240355 |
| C O | 0.805895  | 1.998897  | -0.976172 |
| C O | 1.707747  | -1.706717 | -1.354522 |
| C O | 2.625788  | -0.580495 | -0.805298 |
| H O | 0.367179  | -2.748933 | 1.485377  |
| H O | 1.923955  | -0.949115 | 2.418071  |
| H O | 2.585624  | 0.868705  | 0.837682  |
| H O | 0.100051  | 1.137260  | 0.838741  |
| H O | -0.273718 | -2.519939 | -0.918051 |
| H O | -0.301218 | -0.141216 | -1.836894 |
| H O | -2.263750 | 1.328226  | 0.998701  |
| H O | -3.413439 | 0.004628  | 1.263558  |
| H O | -1.747614 | -0.083279 | 1.886940  |
| H O | -3.430904 | -1.927464 | -0.673350 |
| H O | -3.587645 | -0.471674 | -1.621566 |
| H O | -2.399300 | -1.693075 | -2.107411 |
| H O | 1.274692  | 1.729909  | -1.930273 |
| H O | 1.441859  | 2.748933  | -0.489349 |
| H O | -0.151560 | 2.480092  | -1.211898 |
| H O | 1.487067  | -1.552510 | -2.418071 |
| H O | 2.194805  | -2.684519 | -1.266072 |
| H O | 2.850312  | 0.158072  | -1.583227 |
| H O | 3.587645  | -0.988688 | -0.477133 |

#### P-23+CH

B3LYP/6-31G(d) Geometry

|      |           |           |           |
|------|-----------|-----------|-----------|
| C O  | 0.440461  | -0.717120 | 1.691475  |
| C O  | 1.274709  | 0.326459  | 1.614737  |
| C O  | 1.647906  | 0.721064  | 0.203797  |
| C O  | 0.317653  | 1.072355  | -0.538606 |
| C O  | 0.072097  | -1.315931 | 0.353670  |
| C O  | -0.593354 | -0.196855 | -0.556393 |
| B O  | -2.099572 | -0.017337 | -0.158693 |
| C O  | 0.531698  | 1.647814  | -1.944983 |
| Cl O | -2.710687 | 1.315827  | 0.828308  |
| Cl O | -3.287059 | -1.235154 | -0.672071 |
| C O  | 1.390062  | -1.737773 | -0.354172 |
| C O  | 2.326121  | -0.503689 | -0.471598 |
| H O  | 0.062466  | -1.130020 | 2.623282  |
| H O  | 1.649282  | 0.869063  | 2.479064  |
| H O  | 2.318392  | 1.587364  | 0.183555  |
| H O  | -0.166870 | 1.851491  | 0.059664  |
| H O  | -0.594401 | -2.177945 | 0.449979  |
| H O  | -0.598184 | -0.619599 | -1.572191 |

|     |           |           |           |
|-----|-----------|-----------|-----------|
| H O | 0.996536  | 0.922377  | -2.623282 |
| H O | -0.423314 | 1.947883  | -2.393116 |
| H O | 1.174128  | 2.535977  | -1.912413 |
| H O | 1.156534  | -2.153753 | -1.341929 |
| H O | 1.865384  | -2.535977 | 0.226079  |
| H O | 2.548761  | -0.278448 | -1.520498 |
| H O | 3.287059  | -0.697436 | 0.016060  |

#### P-24+CH

B3LYP/6-31G(d) Geometry

|     |           |           |           |
|-----|-----------|-----------|-----------|
| C O | 0.074838  | 1.294820  | 1.390554  |
| C O | 1.127620  | 1.370402  | 0.567731  |
| C O | 0.887903  | 0.776620  | -0.804733 |
| C O | 0.462786  | -0.696830 | -0.622624 |
| C O | -1.149842 | 0.642043  | 0.784505  |
| C O | -0.704468 | -0.790891 | 0.365441  |
| N O | 1.637479  | -1.566985 | -0.167701 |
| N O | -1.902999 | -1.530429 | -0.218050 |
| O O | 1.392186  | -2.537462 | 0.540758  |
| O O | 2.745551  | -1.264618 | -0.594337 |
| O O | -2.745551 | -1.887954 | 0.596289  |
| O O | -1.985067 | -1.679631 | -1.435896 |
| C O | -0.329593 | 1.502384  | -1.450185 |
| C O | -1.546818 | 1.442726  | -0.486527 |
| H O | 0.064438  | 1.669485  | 2.409976  |
| H O | 2.081054  | 1.816960  | 0.832771  |
| H O | 1.764334  | 0.828007  | -1.450370 |
| H O | 0.176557  | -1.139536 | -1.580911 |
| H O | -1.981181 | 0.562843  | 1.488309  |
| H O | -0.439371 | -1.378793 | 1.241883  |
| H O | -0.569408 | 1.030877  | -2.409976 |
| H O | -0.045499 | 2.537462  | -1.660799 |
| H O | -2.410595 | 0.978768  | -0.973913 |
| H O | -1.855786 | 2.446259  | -0.180145 |

#### P-25+CH

B3LYP/6-31G(d) Geometry

|     |           |           |           |
|-----|-----------|-----------|-----------|
| C O | -0.931303 | 0.506607  | 1.125629  |
| C O | -0.767767 | -0.821503 | 1.174929  |
| C O | -0.707293 | -1.488594 | -0.178008 |
| C O | -1.012839 | 1.069333  | -0.272044 |
| C O | 0.482739  | -0.863432 | -1.005368 |
| C O | 0.306149  | 0.700730  | -1.048299 |
| C O | 1.774008  | -1.419523 | -0.449160 |
| C O | 1.414389  | 1.670178  | -0.592941 |
| O O | 1.656712  | 2.655940  | -1.252783 |
| O O | 2.003880  | 1.484380  | 0.600032  |
| O O | 2.252590  | -1.178304 | 0.647372  |
| O O | 2.338401  | -2.318110 | -1.278968 |
| C O | -2.194433 | 0.383435  | -1.009958 |
| C O | -2.011790 | -1.157172 | -0.951570 |
| H O | -0.991755 | 1.145589  | 2.001822  |
| H O | -0.680149 | -1.393107 | 2.093989  |
| H O | -0.572454 | -2.572414 | -0.105891 |
| H O | -1.135030 | 2.155705  | -0.282706 |
| H O | 0.405897  | -1.236463 | -2.029791 |
| H O | 0.157527  | 0.979683  | -2.093989 |
| H O | 1.864539  | 0.568745  | 0.927793  |
| H O | 3.134661  | -2.655940 | -0.824501 |
| H O | -2.231269 | 0.737878  | -2.046716 |
| H O | -3.134661 | 0.682717  | -0.536202 |
| H O | -1.961158 | -1.589204 | -1.958303 |
| H O | -2.854846 | -1.633726 | -0.441694 |

#### P-26+CH

B3LYP/6-31G(d) Geometry

|     |           |           |           |
|-----|-----------|-----------|-----------|
| C O | 0.671784  | -1.812247 | 0.444231  |
| C O | 0.607408  | -0.768529 | 1.278019  |
| C O | 0.565076  | 0.576675  | 0.592486  |
| C O | -0.737178 | 0.582856  | -0.325160 |
| C O | 0.697413  | -1.439707 | -1.019461 |
| C O | -0.603540 | -0.632010 | -1.357776 |
| C O | -0.833261 | 1.852355  | -1.069979 |
| C O | -1.921741 | 0.478038  | 0.546091  |
| C O | -1.779238 | -1.504066 | -1.392242 |
| N O | -2.679808 | -2.233237 | -1.456220 |
| N O | -0.864458 | 2.848485  | -1.664699 |
| N O | -2.827545 | 0.429273  | 1.268990  |
| C O | 1.901819  | -0.494924 | -1.274083 |
| C O | 1.810323  | 0.724836  | -0.318337 |
| H O | 0.699726  | -2.848485 | 0.766158  |
| H O | 0.571372  | -0.848102 | 2.359702  |
| H O | 0.488277  | 1.409161  | 1.295254  |
| H O | 0.742046  | -2.313344 | -1.674467 |
| H O | -0.492484 | -0.202831 | -2.359702 |
| H O | 1.902917  | -0.173473 | -2.322152 |
| H O | 2.827545  | -1.053488 | -1.109633 |
| H O | 1.755678  | 1.665239  | -0.876111 |
| H O | 2.692578  | 0.786983  | 0.324849  |

#### P-27+CH

B3LYP/6-31G(d) Geometry

|     |           |           |           |
|-----|-----------|-----------|-----------|
| C O | 0.498724  | -0.222341 | 1.352628  |
| C O | 0.939246  | 0.933651  | 0.843148  |
| C O | 1.078066  | 0.933899  | -0.662716 |
| C O | -0.305110 | 0.618246  | -1.312399 |
| C O | 0.216285  | -1.287788 | 0.315608  |
| C O | -0.876575 | -0.713327 | -0.669706 |
| C O | -2.088674 | -0.459707 | 0.134346  |
| N O | -3.058146 | -0.309955 | 0.756662  |
| C O | -1.279753 | -1.729446 | -1.764747 |
| C O | -1.258789 | 1.816884  | -1.263226 |
| C O | 1.534400  | -1.546493 | -0.463365 |
| C O | 2.058539  | -0.207443 | -1.049306 |
| H O | 0.340048  | -0.405351 | 2.411357  |
| H O | 1.189743  | 1.804167  | 1.443356  |
| H O | 1.443912  | 1.893421  | -1.043617 |
| H O | -0.115348 | 0.390792  | -2.370011 |
| H O | -0.156384 | -2.214205 | 0.763383  |
| H O | -1.644570 | -2.662402 | -1.322107 |
| H O | -2.077327 | -1.319173 | -2.392705 |
| H O | -0.428430 | -1.961149 | -2.411357 |
| H O | -0.823892 | 2.662402  | -1.809145 |
| H O | -2.224983 | 1.582977  | -1.723480 |
| H O | -1.452032 | 2.136115  | -0.234286 |
| H O | 1.377605  | -2.291210 | -1.250563 |
| H O | 2.260394  | -1.979563 | 0.231977  |
| H O | 2.140261  | -0.262697 | -2.142176 |
| H O | 3.058146  | 0.021183  | -0.665914 |

#### P-28+CH

B3LYP/6-31G(d) Geometry

|     |           |           |           |
|-----|-----------|-----------|-----------|
| C O | -0.508795 | -1.808713 | -0.416641 |
| C O | -1.190885 | -1.129495 | -1.345153 |
| C O | -1.311916 | 0.351486  | -1.064853 |
| C O | 0.137878  | 0.930538  | -0.982934 |

|     |           |           |           |
|-----|-----------|-----------|-----------|
| C O | -0.035118 | -0.962591 | 0.744149  |
| C O | 0.911318  | 0.177447  | 0.190553  |
| C O | 2.113854  | -0.466617 | -0.369781 |
| N O | 3.074840  | -0.961302 | -0.796249 |
| C O | 0.171328  | 2.463099  | -0.916030 |
| C O | 1.397815  | 1.096427  | 1.337946  |
| C O | -1.294291 | -0.311153 | 1.378088  |
| C O | -2.033924 | 0.525613  | 0.299671  |
| H O | -0.308333 | -2.875351 | -0.459496 |
| H O | -1.610699 | -1.578245 | -2.241647 |
| H O | -1.859845 | 0.875252  | -1.855578 |
| H O | 0.628722  | 0.650961  | -1.920371 |
| H O | 0.512664  | -1.548851 | 1.488317  |
| H O | -0.306481 | 2.868993  | -0.019004 |
| H O | -0.356045 | 2.875351  | -1.784134 |
| H O | 1.197998  | 2.842778  | -0.948301 |
| H O | 1.847639  | 0.493788  | 2.134053  |
| H O | 2.155045  | 1.801574  | 0.984873  |
| H O | 0.574998  | 1.671080  | 1.768809  |
| H O | -1.021348 | 0.303439  | 2.241647  |
| H O | -1.935366 | -1.113181 | 1.757173  |
| H O | -2.063235 | 1.585644  | 0.576529  |
| H O | -3.074840 | 0.201357  | 0.201437  |

#### P-29+CH

B3LYP/6-31G(d) Geometry

|     |           |           |           |
|-----|-----------|-----------|-----------|
| C O | -0.035085 | -2.000771 | 0.408352  |
| C O | 0.639552  | -1.301191 | 1.327593  |
| C O | 1.361706  | -0.089701 | 0.784504  |
| C O | 0.280160  | 0.873471  | 0.150066  |
| C O | 0.054604  | -1.433329 | -0.988797 |
| C O | -0.494567 | 0.036241  | -0.965633 |
| C O | 0.961046  | 2.005487  | -0.503135 |
| C O | -0.641898 | 1.449858  | 1.248057  |
| C O | -1.949952 | 0.040418  | -0.788441 |
| N O | -3.104923 | 0.017813  | -0.670947 |
| N O | 1.501549  | 2.900591  | -1.009213 |
| C O | 1.549782  | -1.355868 | -1.399674 |
| C O | 2.340970  | -0.568983 | -0.320658 |
| H O | -0.604643 | -2.900591 | 0.620723  |
| H O | 0.686980  | -1.565111 | 2.380180  |
| H O | 1.898839  | 0.459825  | 1.562938  |
| H O | -0.518884 | -2.014663 | -1.715575 |
| H O | -0.297942 | 0.486605  | -1.945381 |
| H O | -0.044187 | 2.003580  | 1.978970  |
| H O | -1.386243 | 2.129959  | 0.825852  |
| H O | -1.166970 | 0.640399  | 1.760872  |
| H O | 1.635142  | -0.872368 | -2.380180 |
| H O | 1.939089  | -2.372356 | -1.510094 |
| H O | 2.858117  | 0.290846  | -0.758424 |
| H O | 3.104923  | -1.200649 | 0.142247  |

#### P-30+CH

B3LYP/6-31G(d) Geometry

|     |           |           |           |
|-----|-----------|-----------|-----------|
| C O | -0.587110 | 1.326439  | 1.131946  |
| C O | -0.599198 | 0.033827  | 1.474843  |
| C O | -0.643284 | -0.921518 | 0.302401  |
| C O | 0.645220  | -0.658954 | -0.575563 |
| C O | -0.632877 | 1.572962  | -0.358247 |
| C O | 0.597454  | 0.864203  | -1.026524 |
| C O | 1.814237  | -0.955030 | 0.273284  |
| C O | 1.833902  | 1.611100  | -0.779872 |
| N O | 2.789318  | 2.248783  | -0.611655 |

|     |           |           |           |
|-----|-----------|-----------|-----------|
| N O | 2.716690  | -1.267217 | 0.933537  |
| C O | 0.733847  | -1.585308 | -1.809640 |
| C O | -1.906551 | 0.896315  | -0.931521 |
| C O | -1.917495 | -0.601953 | -0.524452 |
| H O | -0.545180 | 2.146891  | 1.841672  |
| H O | -0.564776 | -0.327411 | 2.498006  |
| H O | -0.639271 | -1.968341 | 0.619379  |
| H O | -0.611489 | 2.636435  | -0.609824 |
| H O | 0.441059  | 0.878627  | -2.112583 |
| H O | -0.095379 | -1.398241 | -2.498006 |
| H O | 1.670421  | -1.414344 | -2.349492 |
| H O | 0.704446  | -2.636435 | -1.506334 |
| H O | -1.923432 | 1.009764  | -2.022565 |
| H O | -2.789318 | 1.414027  | -0.544841 |
| H O | -1.983057 | -1.252262 | -1.402733 |
| H O | -2.789233 | -0.830244 | 0.096032  |

#### P-31+CH

B3LYP/6-31G(d) Geometry

|     |           |           |           |
|-----|-----------|-----------|-----------|
| C O | 1.254391  | -0.554535 | 1.398085  |
| C O | 0.830970  | -1.746605 | 0.960115  |
| C O | 0.381429  | -1.749157 | -0.483524 |
| C O | -0.765572 | -0.700064 | -0.670599 |
| C O | 1.193146  | 0.544037  | 0.360310  |
| C O | -0.300239 | 0.709501  | -0.107530 |
| C O | -2.048465 | -1.214352 | -0.052644 |
| O O | -3.120881 | -1.227288 | -0.619462 |
| C O | -1.148167 | 1.192123  | 1.089357  |
| C O | -0.432586 | 1.768181  | -1.219076 |
| C O | 1.577199  | -1.278021 | -1.358595 |
| C O | 2.088450  | 0.087630  | -0.827234 |
| H O | 1.626586  | -0.374551 | 2.403421  |
| H O | 0.822330  | -2.650743 | 1.563357  |
| H O | 0.039836  | -2.737331 | -0.810370 |
| H O | -0.975703 | -0.599783 | -1.741742 |
| H O | 1.549222  | 1.501876  | 0.756761  |
| H O | -1.953316 | -1.614715 | 0.981786  |
| H O | -1.085576 | 0.512677  | 1.944403  |
| H O | -2.203756 | 1.296526  | 0.812902  |
| H O | -0.796631 | 2.176889  | 1.421363  |
| H O | -1.487106 | 1.907867  | -1.484124 |
| H O | 0.098886  | 1.487211  | -2.133742 |
| H O | -0.041728 | 2.737331  | -0.883968 |
| H O | 1.252712  | -1.200380 | -2.403421 |
| H O | 2.369190  | -2.033285 | -1.325189 |
| H O | 2.092167  | 0.843697  | -1.618613 |
| H O | 3.120881  | 0.002788  | -0.472983 |

#### P-32+CH

B3LYP/6-31G(d) Geometry

|     |           |           |           |
|-----|-----------|-----------|-----------|
| C O | 0.761302  | -0.446085 | 1.365344  |
| C O | 0.611467  | -1.644966 | 0.789822  |
| C O | 0.401400  | -1.597435 | -0.706014 |
| C O | -0.884098 | -0.752531 | -1.017991 |
| C O | 0.687303  | 0.717866  | 0.406817  |
| C O | -0.746009 | 0.651089  | -0.287058 |
| C O | -2.120510 | -1.563764 | -0.646342 |
| O O | -2.746967 | -2.188723 | -1.471004 |
| C O | -1.774517 | 0.862513  | 0.752862  |
| C O | -0.884519 | 1.740010  | -1.272604 |
| N O | -0.953338 | 2.590584  | -2.059295 |
| N O | -2.561258 | 1.040971  | 1.587142  |
| C O | 1.609976  | -0.861285 | -1.346881 |

|     |           |           |           |
|-----|-----------|-----------|-----------|
| C O | 1.764571  | 0.537578  | -0.693604 |
| H O | 0.918979  | -0.289736 | 2.427834  |
| H O | 0.641497  | -2.585740 | 1.331984  |
| H O | 0.277755  | -2.590584 | -1.146766 |
| H O | -0.939074 | -0.586283 | -2.097024 |
| H O | 0.786764  | 1.685435  | 0.903877  |
| H O | -2.382671 | -1.603317 | 0.429613  |
| H O | 1.453060  | -0.774918 | -2.427834 |
| H O | 2.510739  | -1.464485 | -1.198557 |
| H O | 1.675095  | 1.336751  | -1.436538 |
| H O | 2.746967  | 0.646860  | -0.225322 |

#### P-33+CH

B3LYP/6-31G(d) Geometry

|     |           |           |           |
|-----|-----------|-----------|-----------|
| C O | -0.579600 | -1.841344 | 0.667917  |
| C O | -0.579728 | -1.840783 | -0.669043 |
| C O | -0.626192 | -0.467041 | -1.293060 |
| C O | 0.675329  | 0.315941  | -0.813707 |
| C O | -0.625877 | -0.468108 | 1.293088  |
| C O | 0.675593  | 0.315143  | 0.814060  |
| C O | 0.660562  | 1.683064  | -1.363754 |
| C O | 1.861157  | -0.364294 | -1.363189 |
| C O | 1.861490  | -0.365860 | 1.362442  |
| N O | 2.761439  | -0.911315 | 1.850310  |
| C O | 0.661284  | 1.681732  | 1.365437  |
| N O | 0.610615  | 2.736245  | -1.847824 |
| N O | 2.761027  | -0.909109 | -1.851916 |
| N O | 0.611714  | 2.734460  | 1.850531  |
| C O | -1.876746 | 0.286000  | 0.775864  |
| C O | -1.877004 | 0.286542  | -0.774914 |
| H O | -0.539346 | -2.736245 | 1.280262  |
| H O | -0.539621 | -2.735175 | -1.282143 |
| H O | -0.606287 | -0.496203 | -2.384526 |
| H O | -0.605707 | -0.498169 | 2.384526  |
| H O | -1.890076 | 1.305385  | 1.173649  |
| H O | -2.761150 | -0.222412 | 1.169555  |
| H O | -1.890674 | 1.306196  | -1.171989 |
| H O | -2.761439 | -0.221780 | -1.168653 |

#### P-34+CH

B3LYP/6-31G(d) Geometry

|     |           |           |           |
|-----|-----------|-----------|-----------|
| C O | -0.553251 | -1.935007 | -0.955056 |
| C O | -0.534198 | -0.946425 | -1.854778 |
| C O | -0.616007 | 0.437600  | -1.257813 |
| C O | 0.644331  | 0.617514  | -0.298676 |
| C O | -0.641869 | -1.468987 | 0.480845  |
| C O | 0.631439  | -0.584774 | 0.789495  |
| C O | 0.571693  | 1.940039  | 0.351350  |
| C O | 1.861037  | 0.623771  | -1.131733 |
| C O | 1.812477  | -1.450128 | 0.623413  |
| N O | 2.716112  | -2.176702 | 0.568240  |
| C O | 0.654748  | -0.077718 | 2.249951  |
| N O | 0.478951  | 2.989419  | 0.838408  |
| N O | 2.788799  | 0.667100  | -1.826977 |
| C O | -1.929940 | -0.616945 | 0.628908  |
| C O | -1.902710 | 0.541930  | -0.401495 |
| H O | -0.496450 | -2.989419 | -1.206360 |
| H O | -0.459272 | -1.091836 | -2.927589 |
| H O | -0.579161 | 1.227881  | -2.010815 |
| H O | -0.646528 | -2.304251 | 1.186486  |
| H O | -0.180758 | 0.593290  | 2.458007  |
| H O | 0.594631  | -0.934615 | 2.927589  |
| H O | 1.582308  | 0.460194  | 2.462457  |

|     |           |           |           |
|-----|-----------|-----------|-----------|
| H O | -2.027809 | -0.236860 | 1.650175  |
| H O | -2.788799 | -1.272075 | 0.456526  |
| H O | -1.946061 | 1.517999  | 0.092312  |
| H O | -2.762177 | 0.489077  | -1.075850 |

#### P-35+CH

B3LYP/6-31G(d) Geometry

|     |           |           |           |
|-----|-----------|-----------|-----------|
| C O | 1.027679  | -0.535239 | 1.639674  |
| C O | 0.697179  | -1.723005 | 1.120961  |
| C O | 0.387059  | -1.694618 | -0.359550 |
| C O | -0.841319 | -0.733812 | -0.625347 |
| C O | 1.010594  | 0.598227  | 0.644089  |
| C O | -0.467952 | 0.681051  | 0.053182  |
| C O | -2.042950 | -1.384431 | 0.086603  |
| O O | -3.002434 | -1.826428 | -0.500520 |
| C O | -1.383570 | 1.037767  | 1.157775  |
| C O | -0.536223 | 1.794086  | -0.913336 |
| N O | -0.543933 | 2.685801  | -1.656222 |
| C O | -1.170739 | -0.615006 | -2.118897 |
| N O | -2.081529 | 1.328603  | 2.038460  |
| C O | 1.649917  | -1.143559 | -1.078685 |
| C O | 1.979483  | 0.264967  | -0.519987 |
| H O | 1.285332  | -0.367335 | 2.680608  |
| H O | 0.664011  | -2.646222 | 1.692599  |
| H O | 0.130693  | -2.685801 | -0.746648 |
| H O | 1.252833  | 1.563325  | 1.094893  |
| H O | -1.953764 | -1.480891 | 1.185889  |
| H O | -1.319830 | -1.613962 | -2.537730 |
| H O | -0.381080 | -0.113121 | -2.680608 |
| H O | -2.099730 | -0.059106 | -2.268721 |
| H O | 1.495686  | -1.115474 | -2.160787 |
| H O | 2.475415  | -1.838003 | -0.895148 |
| H O | 1.901586  | 1.032719  | -1.297001 |
| H O | 3.002434  | 0.306707  | -0.134958 |

#### P-36+CH

B3LYP/6-31G(d) Geometry

|     |           |           |           |
|-----|-----------|-----------|-----------|
| C O | -1.389513 | -0.469131 | -1.567149 |
| C O | -0.848645 | -1.657719 | -1.275195 |
| C O | -0.287899 | -1.751792 | 0.126910  |
| C O | 0.831640  | -0.653119 | 0.327123  |
| C O | -1.316761 | 0.532547  | -0.438087 |
| C O | 0.193624  | 0.779436  | -0.063480 |
| C O | 1.962088  | -1.016531 | -0.641153 |
| O O | 3.140847  | -1.030540 | -0.357505 |
| C O | 0.897949  | 1.426454  | -1.279731 |
| C O | 0.294212  | 1.811141  | 1.079546  |
| C O | 1.421846  | -0.722824 | 1.746956  |
| C O | -1.470349 | -1.474624 | 1.097218  |
| C O | -2.084900 | -0.090030 | 0.762362  |
| H O | -1.857566 | -0.230606 | -2.518811 |
| H O | -0.830548 | -2.504323 | -1.956875 |
| H O | 0.141620  | -2.739380 | 0.331126  |
| H O | -1.767204 | 1.492620  | -0.715392 |
| H O | 1.633142  | -1.306609 | -1.661579 |
| H O | 0.809628  | 0.822643  | -2.186968 |
| H O | 1.962969  | 1.593218  | -1.082157 |
| H O | 0.446069  | 2.403446  | -1.491220 |
| H O | 1.338606  | 2.058858  | 1.297240  |
| H O | -0.168893 | 1.484976  | 2.013275  |
| H O | -0.203508 | 2.739380  | 0.772860  |
| H O | 1.765007  | -1.742248 | 1.955486  |
| H O | 0.701213  | -0.447676 | 2.518811  |



|     |           |           |          |
|-----|-----------|-----------|----------|
| H O | 2.293879  | -0.071586 | 1.839923 |
| H O | -1.133203 | -1.521240 | 2.137180 |
| H O | -2.212472 | -2.270221 | 0.973807 |
| H O | -2.049251 | 0.578173  | 1.628417 |
| H O | -3.140847 | -0.189474 | 0.490531 |

### P-37+CH

B3LYP/6-31G(d) Geometry

|     |           |           |           |
|-----|-----------|-----------|-----------|
| C O | 2.517730  | 0.104802  | 0.711655  |
| C O | 3.246638  | -0.670156 | -0.416053 |
| C O | 0.856479  | -1.505092 | -0.435828 |
| C O | 1.007367  | -1.718926 | 1.054195  |
| C O | 1.868536  | -0.885174 | 1.647730  |
| C O | 1.351800  | 0.967344  | 0.049765  |
| C O | 0.325907  | -0.028236 | -0.703105 |
| C O | -1.037959 | 0.008672  | -0.046197 |
| O O | -2.066167 | 0.030600  | -0.721274 |
| C O | 0.693538  | 1.752696  | 1.113436  |
| C O | 1.946862  | 1.945065  | -0.881291 |
| C O | 0.181562  | 0.270713  | -2.202728 |
| N O | 0.191489  | 2.360038  | 1.965668  |
| N O | 2.461505  | 2.703702  | -1.592801 |
| C O | 2.263325  | -1.672017 | -1.072899 |
| H O | 3.197289  | 0.790425  | 1.222526  |
| H O | 4.100488  | -1.190737 | 0.026650  |
| H O | 3.651321  | 0.034373  | -1.150016 |
| H O | 0.146102  | -2.204142 | -0.886945 |
| H O | 0.458045  | -2.498242 | 1.574589  |
| H O | 2.103007  | -0.895331 | 2.707386  |
| H O | -1.124869 | -0.062901 | 1.044023  |
| H O | 1.148308  | 0.291624  | -2.707386 |
| H O | -0.303171 | 1.237038  | -2.365264 |
| H O | -0.442441 | -0.494374 | -2.671742 |
| H O | 2.216514  | -1.533588 | -2.156342 |
| H O | 2.584221  | -2.703702 | -0.901259 |
| B O | -3.565283 | -0.094103 | -0.086690 |
| H O | -3.385692 | -0.180633 | 1.108403  |
| H O | -4.100488 | 0.916613  | -0.468394 |
| H O | -3.978237 | -1.095317 | -0.622705 |

### P-38+CH

B3LYP/6-31G(d) Geometry

|     |           |           |           |
|-----|-----------|-----------|-----------|
| C O | -0.501516 | 1.836971  | -0.460170 |
| C O | 0.344650  | 1.511337  | -1.442933 |
| C O | 1.379613  | 0.480642  | -1.054990 |
| C O | 0.625182  | -0.840032 | -0.621902 |
| C O | -0.258901 | 1.095105  | 0.835133  |
| C O | -0.414947 | -0.451598 | 0.549184  |
| C O | -0.046950 | -1.497143 | -1.851334 |
| C O | -1.803541 | -0.663963 | 0.098162  |
| N O | -2.914925 | -0.826405 | -0.197359 |
| C O | 1.626228  | -1.802066 | -0.127236 |
| C O | -0.247984 | -1.294294 | 1.836687  |
| N O | 2.434341  | -2.562653 | 0.216390  |
| C O | 1.192121  | 1.404772  | 1.290803  |
| C O | 2.179617  | 1.039686  | 0.151416  |
| H O | -1.303416 | 2.562653  | -0.557497 |
| H O | 0.319591  | 1.944275  | -2.438781 |
| H O | 2.053069  | 0.234091  | -1.880999 |
| H O | -0.976599 | 1.374040  | 1.612126  |
| H O | 0.715697  | -1.758449 | -2.591844 |
| H O | -0.581033 | -2.409740 | -1.573008 |
| H O | -0.760454 | -0.806553 | -2.306223 |

|     |           |           |           |
|-----|-----------|-----------|-----------|
| H O | 0.760505  | -1.205302 | 2.245139  |
| H O | -0.965094 | -0.957283 | 2.591844  |
| H O | -0.435029 | -2.353272 | 1.638266  |
| H O | 1.432074  | 0.864401  | 2.211808  |
| H O | 1.250332  | 2.470530  | 1.532330  |
| H O | 2.914925  | 0.300702  | 0.485658  |
| H O | 2.738983  | 1.920206  | -0.178561 |

### P-39+CH

B3LYP/6-31G(d) Geometry

|     |           |           |           |
|-----|-----------|-----------|-----------|
| C O | 0.519824  | 0.667949  | -1.666681 |
| C O | 0.519868  | -0.668881 | -1.666472 |
| C O | 0.605561  | -1.286975 | -0.289400 |
| C O | -0.649114 | -0.808259 | 0.548067  |
| C O | 0.605542  | 1.286483  | -0.289808 |
| C O | -0.649067 | 0.808001  | 0.547896  |
| C O | -1.842299 | -1.350176 | -0.129574 |
| C O | -1.842301 | 1.349844  | -0.129711 |
| N O | -2.758147 | 1.861505  | -0.627467 |
| N O | -2.758113 | -1.861897 | -0.627328 |
| C O | -0.652754 | -1.437961 | 1.963010  |
| C O | -0.652488 | 1.437983  | 1.962714  |
| C O | 1.909279  | 0.775493  | 0.377633  |
| C O | 1.909239  | -0.775745 | 0.377974  |
| H O | 0.452085  | 1.280531  | -2.560404 |
| H O | 0.452158  | -1.281747 | -2.560003 |
| H O | 0.593829  | -2.380082 | -0.325383 |
| H O | 0.593780  | 2.379578  | -0.326136 |
| H O | 0.200614  | -1.111819 | 2.560404  |
| H O | -1.568603 | -1.188953 | 2.505243  |
| H O | -0.607080 | -2.527628 | 1.871656  |
| H O | 0.200899  | 1.111848  | 2.560086  |
| H O | -0.606685 | 2.527628  | 1.871147  |
| H O | -1.568313 | 1.189198  | 2.505088  |
| H O | 2.009023  | 1.174103  | 1.392105  |
| H O | 2.758121  | 1.165395  | -0.192250 |
| H O | 2.008808  | -1.173902 | 1.392641  |
| H O | 2.758147  | -1.165945 | -0.191608 |

### P-40+CH

B3LYP/6-31G(d) Geometry

|     |           |           |           |
|-----|-----------|-----------|-----------|
| C O | -0.434023 | -1.909717 | -0.834373 |
| C O | -0.934675 | -0.918490 | -1.579093 |
| C O | -1.155185 | 0.373005  | -0.822849 |
| C O | 0.220439  | 0.890173  | -0.256834 |
| C O | -0.167962 | -1.522059 | 0.602719  |
| C O | 0.861184  | -0.318338 | 0.598922  |
| C O | 1.117691  | 1.299738  | -1.443195 |
| C O | 2.094685  | -0.830735 | -0.032130 |
| N O | 3.083608  | -1.259587 | -0.465772 |
| C O | -0.002215 | 2.162084  | 0.588125  |
| C O | 1.279649  | 0.055720  | 2.044286  |
| C O | -1.511733 | -1.059390 | 1.226782  |
| C O | -2.138453 | 0.043899  | 0.334135  |
| H O | -0.215023 | -2.907196 | -1.203929 |
| H O | -1.182436 | -1.015983 | -2.632721 |
| H O | -1.577217 | 1.154217  | -1.464886 |
| H O | 0.260868  | -2.346436 | 1.180812  |
| H O | 0.645811  | 2.122804  | -1.993520 |
| H O | 2.098485  | 1.647220  | -1.100889 |
| H O | 1.282917  | 0.474198  | -2.139912 |
| H O | -0.592389 | 1.998433  | 1.492685  |
| H O | 0.950986  | 2.609170  | 0.889614  |



|     |           |           |           |
|-----|-----------|-----------|-----------|
| H O | -0.532319 | 2.907196  | -0.017069 |
| H O | 0.435060  | 0.418354  | 2.632721  |
| H O | 1.691105  | -0.825282 | 2.547598  |
| H O | 2.052624  | 0.829397  | 2.045600  |
| H O | -1.356913 | -0.702778 | 2.250479  |
| H O | -2.174167 | -1.927781 | 1.299653  |
| H O | -2.370671 | 0.941130  | 0.916430  |
| H O | -3.083608 | -0.298952 | -0.098836 |

#### P-41+CH

B3LYP/6-31G(d) Geometry

|     |           |           |           |
|-----|-----------|-----------|-----------|
| C O | 0.675069  | 0.518578  | 1.221127  |
| C O | 0.366407  | -0.776297 | 1.074293  |
| C O | 0.321029  | -1.256532 | -0.360694 |
| C O | -0.688814 | -0.382338 | -1.151346 |
| C O | 0.912905  | 1.264268  | -0.074887 |
| C O | -0.338841 | 1.136789  | -0.978593 |
| C O | -1.741588 | 1.409138  | -0.353843 |
| C O | -2.052399 | -0.091028 | -0.498050 |
| O O | -3.001244 | -0.777741 | -0.216494 |
| C O | 1.717051  | -0.972425 | -0.992853 |
| C O | 2.067469  | 0.536290  | -0.828650 |
| H O | 0.762669  | 1.011691  | 2.185917  |
| H O | 0.171562  | -1.451937 | 1.902837  |
| H O | 0.060431  | -2.315975 | -0.437148 |
| H O | -0.775958 | -0.737752 | -2.185917 |
| H O | 1.166691  | 2.315975  | 0.095308  |
| H O | -0.171709 | 1.668133  | -1.920877 |
| H O | -2.402661 | 2.045408  | -0.954198 |
| H O | -1.756125 | 1.771190  | 0.680125  |
| H O | 1.702385  | -1.258248 | -2.051702 |
| H O | 2.467896  | -1.600541 | -0.502428 |
| H O | 2.216037  | 1.009694  | -1.807237 |
| H O | 3.001244  | 0.658627  | -0.270473 |

#### P-42+CH

B3LYP/6-31G(d) Geometry

|     |           |           |           |
|-----|-----------|-----------|-----------|
| C O | -0.835067 | -1.600210 | 0.389175  |
| C O | -0.420724 | -0.761418 | 1.346875  |
| C O | -0.182150 | 0.660069  | 0.879923  |
| C O | 0.871089  | 0.641277  | -0.269368 |
| C O | -0.970339 | -0.973869 | -0.983396 |
| C O | 0.384149  | -0.347174 | -1.396828 |
| C O | 1.327020  | 2.033616  | -0.713937 |
| C O | 1.665655  | -1.216697 | -1.222615 |
| C O | 2.069721  | -0.311765 | -0.048480 |
| O O | 2.984051  | -0.316109 | 0.736668  |
| C O | -1.531169 | 1.161597  | 0.279784  |
| C O | -1.980954 | 0.205741  | -0.862750 |
| H O | -1.070035 | -2.647065 | 0.563648  |
| H O | -0.277390 | -1.047456 | 2.385386  |
| H O | 0.152747  | 1.311030  | 1.693661  |
| H O | -1.308347 | -1.696070 | -1.734432 |
| H O | 0.293351  | 0.116200  | -2.385386 |
| H O | 1.820021  | 2.555267  | 0.114408  |
| H O | 0.486091  | 2.647065  | -1.055674 |
| H O | 2.045609  | 1.971246  | -1.539859 |
| H O | 2.372434  | -1.163331 | -2.059532 |
| H O | 1.521544  | -2.269909 | -0.958902 |
| H O | -1.428413 | 2.189175  | -0.085194 |
| H O | -2.279033 | 1.187412  | 1.079038  |
| H O | -2.028055 | 0.738828  | -1.820920 |
| H O | -2.984051 | -0.187389 | -0.668097 |

#### P-43+CH

B3LYP/6-31G(d) Geometry

|     |           |           |           |
|-----|-----------|-----------|-----------|
| C O | 0.679622  | -0.967581 | 1.306501  |
| C O | 0.392327  | -1.940753 | 0.433352  |
| C O | 0.336262  | -1.491903 | -1.011662 |
| C O | -0.692593 | -0.336490 | -1.140432 |
| C O | 0.904507  | 0.395939  | 0.683620  |
| C O | -0.363607 | 0.818878  | -0.120176 |
| C O | 2.086084  | 0.220616  | -0.321000 |
| C O | -1.738405 | 0.577252  | 0.597818  |
| C O | -2.040519 | -0.523735 | -0.428266 |
| O O | -2.981831 | -1.253311 | -0.615186 |
| C O | -0.253196 | 2.218784  | -0.726337 |
| C O | 1.723007  | -0.875448 | -1.365293 |
| H O | 0.772964  | -1.125392 | 2.378024  |
| H O | 0.218433  | -2.976490 | 0.712247  |
| H O | 0.081474  | -2.309778 | -1.691723 |
| H O | -0.788947 | -0.026332 | -2.189381 |
| H O | 1.150200  | 1.154472  | 1.435682  |
| H O | 2.315902  | 1.170595  | -0.814440 |
| H O | 2.981831  | -0.063680 | 0.240319  |
| H O | -2.438436 | 1.420543  | 0.556009  |
| H O | -1.695043 | 0.214271  | 1.630120  |
| H O | -1.160995 | 2.473207  | -1.286730 |
| H O | 0.590848  | 2.308937  | -1.418378 |
| H O | -0.126243 | 2.976490  | 0.057491  |
| H O | 1.684262  | -0.455265 | -2.378024 |
| H O | 2.480165  | -1.666297 | -1.376828 |

#### P-44+CH

B3LYP/6-31G(d) Geometry

|     |           |           |           |
|-----|-----------|-----------|-----------|
| C O | 0.426375  | -1.406599 | 1.260513  |
| C O | -0.103688 | -2.102303 | 0.246955  |
| C O | 0.086309  | -1.473781 | -1.116900 |
| C O | -0.515778 | -0.044912 | -1.092264 |
| C O | 1.134703  | -0.132879 | 0.855038  |
| C O | 0.120678  | 0.788711  | 0.095540  |
| C O | 2.247203  | -0.522976 | -0.164113 |
| C O | -1.304239 | 0.980924  | 0.730074  |
| C O | -1.884114 | 0.133026  | -0.412045 |
| O O | -2.991152 | -0.254391 | -0.676936 |
| C O | 0.746303  | 2.044781  | -0.304968 |
| N O | 1.244642  | 3.046120  | -0.621709 |
| C O | 1.616240  | -1.300890 | -1.355246 |
| H O | 0.387822  | -1.723395 | 2.299098  |
| H O | -0.627957 | -3.046120 | 0.367573  |
| H O | -0.376141 | -2.060790 | -1.915041 |
| H O | -0.451189 | 0.429374  | -2.078013 |
| H O | 1.558336  | 0.400325  | 1.710935  |
| H O | 2.761833  | 0.379009  | -0.512266 |
| H O | 2.991152  | -1.137773 | 0.351208  |
| H O | -1.666219 | 2.014384  | 0.734538  |
| H O | -1.435628 | 0.552420  | 1.728502  |
| H O | 1.777784  | -0.767090 | -2.299098 |
| H O | 2.076697  | -2.288052 | -1.462050 |

#### P-45+CH

B3LYP/6-31G(d) Geometry

|     |           |           |           |
|-----|-----------|-----------|-----------|
| C O | -0.662187 | -0.786480 | 1.272496  |
| C O | -1.247429 | -1.325284 | 0.195759  |
| C O | -1.105659 | -0.510852 | -1.074146 |
| C O | 0.397008  | -0.278880 | -1.363154 |

|      |           |           |           |
|------|-----------|-----------|-----------|
| C O  | 0.008838  | 0.552404  | 1.027599  |
| C O  | 1.059330  | 0.341472  | -0.084805 |
| C O  | -1.728856 | 0.892469  | -0.800858 |
| C O  | 1.359018  | -1.503182 | -1.287333 |
| C O  | 1.967874  | -0.917167 | -0.004682 |
| Cl O | 2.051949  | 1.842834  | -0.372456 |
| O O  | 2.811209  | -1.272863 | 0.771531  |
| C O  | -1.078284 | 1.517258  | 0.466703  |
| H O  | -0.669218 | -1.235917 | 2.261365  |
| H O  | -1.795799 | -2.263382 | 0.214285  |
| H O  | -1.590594 | -0.989917 | -1.930911 |
| H O  | 0.526134  | 0.329353  | -2.261365 |
| H O  | 0.482876  | 0.953970  | 1.926188  |
| H O  | -2.811209 | 0.790452  | -0.673889 |
| H O  | -1.567145 | 1.534331  | -1.675245 |
| H O  | 2.084990  | -1.561923 | -2.106334 |
| H O  | 0.896945  | -2.486626 | -1.154235 |
| H O  | -0.624867 | 2.486626  | 0.239591  |
| H O  | -1.827373 | 1.684916  | 1.246914  |

#### P-46+CH

B3LYP/6-31G(d) Geometry

|     |           |           |           |
|-----|-----------|-----------|-----------|
| C O | -0.692974 | -1.527154 | -1.481523 |
| C O | -0.157392 | -2.174693 | -0.439878 |
| C O | -0.065559 | -1.355607 | 0.830434  |
| C O | 0.787330  | -0.080921 | 0.547849  |
| C O | -1.113053 | -0.102878 | -1.191658 |
| C O | 0.133884  | 0.700984  | -0.686319 |
| C O | -2.138484 | -0.147500 | -0.021138 |
| C O | 1.458608  | 0.524677  | -1.508681 |
| C O | 2.018192  | -0.316618 | -0.355276 |
| O O | 3.046492  | -0.919292 | -0.190233 |
| C O | -0.214860 | 2.094983  | -0.436623 |
| C O | 1.136981  | 0.721112  | 1.802745  |
| N O | -0.493079 | 3.206456  | -0.239176 |
| C O | -1.513253 | -0.902065 | 1.186361  |
| H O | -0.845979 | -1.972446 | -2.460723 |
| H O | 0.181110  | -3.206456 | -0.474701 |
| H O | 0.383290  | -1.919583 | 1.653608  |
| H O | -1.542309 | 0.391587  | -2.068081 |
| H O | -2.424067 | 0.873156  | 0.256353  |
| H O | -3.046492 | -0.650138 | -0.367653 |
| H O | 2.015495  | 1.454268  | -1.668715 |
| H O | 1.360705  | 0.000835  | -2.464109 |
| H O | 1.757160  | 0.106381  | 2.464109  |
| H O | 0.242588  | 1.032128  | 2.351550  |
| H O | 1.701692  | 1.627055  | 1.558921  |
| H O | -1.502257 | -0.269111 | 2.079590  |
| H O | -2.103339 | -1.789051 | 1.437781  |

#### P-47+CH

B3LYP/6-31G(d) Geometry

|     |           |           |           |
|-----|-----------|-----------|-----------|
| C O | -0.427542 | -1.883317 | -0.495729 |
| C O | -0.839790 | -1.096777 | -1.496996 |
| C O | -0.970901 | 0.367951  | -1.132341 |
| C O | 0.400573  | 0.910988  | -0.619758 |
| C O | -0.170611 | -1.154568 | 0.806351  |
| C O | 0.892921  | -0.035446 | 0.565354  |
| C O | -2.000809 | 0.432872  | 0.036189  |
| C O | 0.360647  | 2.416360  | -0.349872 |
| C O | 1.633927  | 0.475015  | -1.482939 |
| C O | 2.055798  | -0.467590 | -0.351346 |
| C O | 1.389709  | 0.597323  | 1.868097  |

|     |           |           |           |
|-----|-----------|-----------|-----------|
| O O | 2.973280  | -1.236437 | -0.202827 |
| C O | -1.509512 | -0.465207 | 1.207356  |
| H O | -0.291629 | -2.958077 | -0.580658 |
| H O | -1.084780 | -1.460691 | -2.491644 |
| H O | -1.316051 | 0.970300  | -1.980758 |
| H O | 0.173888  | -1.830943 | 1.595047  |
| H O | -2.973280 | 0.090848  | -0.332271 |
| H O | -2.139714 | 1.467230  | 0.367718  |
| H O | -0.355815 | 2.688135  | 0.432408  |
| H O | 0.077391  | 2.958077  | -1.261447 |
| H O | 1.341120  | 2.793567  | -0.038630 |
| H O | 2.364905  | 1.273158  | -1.663818 |
| H O | 1.426511  | -0.024083 | -2.435138 |
| H O | 1.860176  | -0.171283 | 2.491644  |
| H O | 0.577135  | 1.054129  | 2.443272  |
| H O | 2.141047  | 1.372643  | 1.683986  |
| H O | -1.373733 | 0.122110  | 2.122020  |
| H O | -2.248955 | -1.238518 | 1.439954  |

#### P-48+CH

B3LYP/6-31G(d) Geometry

|     |           |           |           |
|-----|-----------|-----------|-----------|
| C O | 0.972684  | 0.449325  | 1.180643  |
| C O | 0.661148  | -0.853225 | 1.148880  |
| C O | 0.608454  | -1.446618 | -0.241719 |
| C O | -0.419409 | -0.625310 | -1.084627 |
| C O | 1.227713  | 1.062075  | -0.178714 |
| C O | -0.028742 | 0.877689  | -1.081522 |
| C O | -1.296097 | 1.666041  | -0.624423 |
| C O | -1.826117 | -0.713246 | -0.479951 |
| O O | -2.488012 | -1.727930 | -0.421833 |
| C O | -2.241508 | 0.657743  | 0.050758  |
| C O | 2.002348  | -1.246769 | -0.899681 |
| C O | 2.384316  | 0.260081  | -0.844573 |
| H O | 1.063234  | 1.028635  | 2.096244  |
| H O | 0.461842  | -1.454700 | 2.032019  |
| H O | 0.315670  | -2.500068 | -0.236158 |
| H O | -0.456604 | -1.048546 | -2.096244 |
| H O | 1.487759  | 2.124159  | -0.111841 |
| H O | 0.251730  | 1.201831  | -2.090589 |
| H O | -1.787002 | 2.101790  | -1.502418 |
| H O | -1.034478 | 2.500068  | 0.035612  |
| H O | -2.095125 | 0.634522  | 1.138568  |
| H O | -3.306189 | 0.836930  | -0.128108 |
| H O | 1.970772  | -1.607530 | -1.935076 |
| H O | 2.742501  | -1.856728 | -0.371294 |
| H O | 2.565923  | 0.654507  | -1.852162 |
| H O | 3.306189  | 0.407240  | -0.272625 |

#### P-49+CH

B3LYP/6-31G(d) Geometry

|     |           |           |           |
|-----|-----------|-----------|-----------|
| C O | 0.987420  | 1.202276  | 0.850575  |
| C O | 0.639471  | 0.024516  | 1.384577  |
| C O | 0.519223  | -1.101884 | 0.379865  |
| C O | -0.543463 | -0.675891 | -0.695458 |
| C O | 1.208696  | 1.163786  | -0.646028 |
| C O | -0.077306 | 0.655040  | -1.362901 |
| C O | -1.290459 | 1.630059  | -1.306771 |
| C O | -1.861543 | -0.324202 | 0.031049  |
| O O | -2.524402 | -1.123505 | 0.658533  |
| C O | -2.198492 | 1.152448  | -0.162241 |
| C O | -0.846328 | -1.800248 | -1.700799 |
| C O | 1.907602  | -1.249862 | -0.304956 |
| C O | 2.325304  | 0.114700  | -0.921264 |

|     |           |           |           |
|-----|-----------|-----------|-----------|
| H O | 1.132646  | 2.111838  | 1.428287  |
| H O | 0.460050  | -0.136987 | 2.444233  |
| H O | 0.202761  | -2.038995 | 0.846932  |
| H O | 1.496052  | 2.141882  | -1.047480 |
| H O | 0.192567  | 0.477392  | -2.411387 |
| H O | -1.837289 | 1.581878  | -2.256050 |
| H O | -0.967877 | 2.669622  | -1.183131 |
| H O | -1.965122 | 1.661058  | 0.781525  |
| H O | -3.270256 | 1.283766  | -0.342264 |
| H O | -1.260752 | -2.669622 | -1.180001 |
| H O | 0.051894  | -2.110170 | -2.244738 |
| H O | -1.583990 | -1.474325 | -2.444233 |
| H O | 1.875254  | -2.034206 | -1.068493 |
| H O | 2.634838  | -1.576505 | 0.445747  |
| H O | 2.479197  | 0.025158  | -2.004041 |
| H O | 3.270256  | 0.464007  | -0.492408 |

#### P-50+CH

B3LYP/6-31G(d) Geometry

|     |           |           |           |
|-----|-----------|-----------|-----------|
| C O | 0.921079  | -0.725655 | 1.309231  |
| C O | 0.527973  | -1.852548 | 0.702136  |
| C O | 0.487460  | -1.760282 | -0.807852 |
| C O | -0.449011 | -0.573317 | -1.207093 |
| C O | 1.271540  | 0.402114  | 0.360709  |
| C O | 0.014512  | 0.745559  | -0.513879 |
| C O | 2.416749  | -0.139453 | -0.545566 |
| C O | -1.193745 | 1.209224  | 0.383535  |
| C O | -1.885650 | -0.841972 | -0.752859 |
| O O | -2.618786 | -1.675376 | -1.242426 |
| C O | 0.332114  | 1.849197  | -1.538312 |
| C O | -2.233081 | 0.076041  | 0.415471  |
| C O | 1.915721  | -1.399840 | -1.304515 |
| H O | 1.019893  | -0.619867 | 2.386780  |
| H O | 0.261423  | -2.767567 | 1.224752  |
| H O | 0.123144  | -2.679314 | -1.275493 |
| H O | -0.445606 | -0.490803 | -2.301392 |
| H O | 1.600160  | 1.300708  | 0.895467  |
| H O | 2.759195  | 0.631992  | -1.242477 |
| H O | 3.273157  | -0.387242 | 0.089890  |
| H O | -1.642882 | 2.109690  | -0.050796 |
| H O | -0.854990 | 1.484818  | 1.387612  |
| H O | -0.561290 | 2.096523  | -2.124259 |
| H O | 1.113788  | 1.555862  | -2.246370 |
| H O | 0.661559  | 2.767567  | -1.035385 |
| H O | -2.148391 | -0.525710 | 1.329545  |
| H O | -3.273157 | 0.409742  | 0.345376  |
| H O | 1.885880  | -1.222529 | -2.386780 |
| H O | 2.587010  | -2.248933 | -1.138377 |

#### P-51+CH

B3LYP/6-31G(d) Geometry

|     |           |           |           |
|-----|-----------|-----------|-----------|
| C O | 0.583402  | -1.197458 | 1.291949  |
| C O | 0.012698  | -1.983673 | 0.370414  |
| C O | 0.162846  | -1.485797 | -1.050041 |
| C O | -0.444583 | -0.049456 | -1.133581 |
| C O | 1.288546  | 0.015112  | 0.727650  |
| C O | 0.234285  | 0.876972  | -0.067337 |
| C O | -0.927994 | 1.433785  | 0.846136  |
| C O | -1.941189 | -0.068766 | -0.801761 |
| O O | -2.783799 | -0.582118 | -1.503868 |
| C O | 0.921555  | 2.006593  | -0.706812 |
| N O | 1.463877  | 2.906968  | -1.202657 |
| C O | -2.187919 | 0.609201  | 0.542640  |

|     |           |           |           |
|-----|-----------|-----------|-----------|
| C O | 1.680906  | -1.369685 | -1.361983 |
| C O | 2.363809  | -0.494157 | -0.274728 |
| H O | 0.583101  | -1.408045 | 2.357988  |
| H O | -0.512985 | -2.906968 | 0.598324  |
| H O | -0.347675 | -2.124983 | -1.775048 |
| H O | -0.317779 | 0.329005  | -2.153372 |
| H O | 1.744502  | 0.634228  | 1.505943  |
| H O | -1.101115 | 2.487542  | 0.610227  |
| H O | -0.634555 | 1.386245  | 1.898708  |
| H O | -2.337355 | -0.189323 | 1.280116  |
| H O | -3.109304 | 1.198085  | 0.510855  |
| H O | 1.814454  | -0.931590 | -2.357988 |
| H O | 2.120711  | -2.371697 | -1.390075 |
| H O | 2.886171  | 0.356673  | -0.723974 |
| H O | 3.109304  | -1.071437 | 0.280562  |

#### P-52+CH

B3LYP/6-31G(d) Geometry

|      |           |           |           |
|------|-----------|-----------|-----------|
| C O  | -0.705618 | -0.547871 | 1.434955  |
| C O  | -1.163212 | -1.388519 | 0.497984  |
| C O  | -1.233232 | -0.793036 | -0.892405 |
| C O  | 0.172745  | -0.289186 | -1.333180 |
| C O  | -0.318252 | 0.822640  | 0.909522  |
| C O  | 0.757325  | 0.557978  | -0.174061 |
| C O  | -2.153801 | 0.460406  | -0.803843 |
| C O  | 1.227144  | -1.391598 | -1.641784 |
| C O  | 1.940441  | -0.262004 | 0.410910  |
| O O  | 2.584044  | 0.068218  | 1.378286  |
| C O  | -1.569621 | 1.452893  | 0.240241  |
| C O  | 2.106038  | -1.550148 | -0.389853 |
| Cl O | 1.474332  | 2.134465  | -0.796517 |
| H O  | -0.605459 | -0.796109 | 2.487644  |
| H O  | -1.500523 | -2.400800 | 0.705849  |
| H O  | -1.618899 | -1.503210 | -1.631423 |
| H O  | 0.027936  | 0.335385  | -2.218695 |
| H O  | 0.101176  | 1.463885  | 1.687569  |
| H O  | -3.164712 | 0.147372  | -0.523598 |
| H O  | -2.224229 | 0.931027  | -1.791908 |
| H O  | 1.843295  | -1.067946 | -2.487644 |
| H O  | 0.748165  | -2.330618 | -1.938038 |
| H O  | -1.289828 | 2.400800  | -0.229579 |
| H O  | -2.305665 | 1.683232  | 1.016958  |
| H O  | 3.164712  | -1.731731 | -0.600441 |
| H O  | 1.763076  | -2.369619 | 0.254226  |

#### P-53+CH

B3LYP/6-31G(d) Geometry

|     |           |           |           |
|-----|-----------|-----------|-----------|
| C O | -0.431152 | -1.396323 | -1.621798 |
| C O | 0.212627  | -1.986863 | -0.607562 |
| C O | 0.011633  | -1.310440 | 0.731493  |
| C O | 0.507710  | 0.176787  | 0.607125  |
| C O | -1.255958 | -0.195473 | -1.217669 |
| C O | -0.308051 | 0.877536  | -0.553786 |
| C O | -2.279420 | -0.677081 | -0.150505 |
| C O | 0.754937  | 1.459339  | -1.561830 |
| C O | 1.968167  | 0.144766  | 0.099692  |
| O O | 2.888388  | -0.301910 | 0.749158  |
| C O | -1.141483 | 1.988396  | -0.074643 |
| C O | 0.495262  | 0.905803  | 1.961506  |
| N O | -1.804180 | 2.876934  | 0.274475  |
| C O | 2.078908  | 0.730289  | -1.302843 |
| C O | -1.513301 | -1.331563 | 1.031253  |

|     |           |           |           |
|-----|-----------|-----------|-----------|
| H O | -0.412000 | -1.751822 | -2.648555 |
| H O | 0.827440  | -2.876934 | -0.710159 |
| H O | 0.581620  | -1.796790 | 1.527718  |
| H O | -1.770250 | 0.264212  | -2.067090 |
| H O | -2.886315 | 0.167829  | 0.190612  |
| H O | -2.961223 | -1.392778 | -0.619999 |
| H O | 0.875374  | 2.531312  | -1.379302 |
| H O | 0.399594  | 1.350126  | -2.590731 |
| H O | 1.171137  | 0.388065  | 2.648555  |
| H O | 0.842964  | 1.939713  | 1.862639  |
| H O | -0.504968 | 0.940709  | 2.400854  |
| H O | 2.230421  | -0.107404 | -1.993499 |
| H O | 2.961223  | 1.373468  | -1.376901 |

#### P-54+CH

B3LYP/6-31G(d) Geometry

|     |           |           |           |
|-----|-----------|-----------|-----------|
| C O | -0.408561 | -1.822802 | -1.190455 |
| C O | -0.861778 | -0.698431 | -1.758168 |
| C O | -1.252192 | 0.378444  | -0.768373 |
| C O | -0.010606 | 0.772298  | 0.113337  |
| C O | -0.342990 | -1.766255 | 0.320954  |
| C O | 0.583032  | -0.557030 | 0.728134  |
| C O | -2.362559 | -0.252005 | 0.122235  |
| C O | -0.426006 | 1.832854  | 1.149710  |
| C O | 1.131797  | 1.380153  | -0.777757 |
| C O | 1.942154  | -0.771218 | 0.023210  |
| C O | 0.851127  | -0.551969 | 2.243757  |
| O O | 2.712758  | -1.666686 | 0.300897  |
| C O | -1.786990 | -1.505899 | 0.834215  |
| C O | 2.168322  | 0.282836  | -1.053267 |
| H O | -0.106862 | -2.709642 | -1.741686 |
| H O | -0.984251 | -0.563912 | -2.830204 |
| H O | -1.631301 | 1.276630  | -1.269424 |
| H O | 0.071355  | -2.683684 | 0.748923  |
| H O | -3.207379 | -0.524244 | -0.518918 |
| H O | -2.744490 | 0.474656  | 0.846196  |
| H O | -1.178697 | 1.478360  | 1.859795  |
| H O | -0.842486 | 2.709642  | 0.637093  |
| H O | 0.435074  | 2.176813  | 1.732246  |
| H O | 1.610605  | 2.204136  | -0.235212 |
| H O | 0.724089  | 1.812343  | -1.698175 |
| H O | 1.338790  | -1.491132 | 2.522449  |
| H O | -0.065858 | -0.446131 | 2.830204  |
| H O | 1.523667  | 0.263216  | 2.532449  |
| H O | -1.784523 | -1.376078 | 1.921677  |
| H O | -2.401058 | -2.389018 | 0.628191  |
| H O | 3.207379  | 0.627750  | -1.033469 |
| H O | 2.009308  | -0.203743 | -2.022769 |

#### P-55+CH

B3LYP/6-31G(d) Geometry

|     |           |           |           |
|-----|-----------|-----------|-----------|
| C O | 0.456004  | -0.669598 | 1.171993  |
| C O | 0.456005  | 0.669601  | 1.171992  |
| C O | 0.550397  | 1.297273  | -0.201445 |
| C O | 0.550394  | -1.297272 | -0.201443 |
| C O | -0.637778 | 0.769692  | -1.062570 |
| C O | -0.637779 | -0.769691 | -1.062569 |
| C O | -1.990293 | 1.148818  | -0.479134 |
| C O | -1.990294 | -1.148815 | -0.479134 |
| O O | -2.434573 | -2.240918 | -0.269096 |
| O O | -2.434569 | 2.240921  | -0.269096 |
| O O | -2.716119 | 0.000002  | -0.185786 |
| C O | 1.849270  | -0.778385 | -0.881970 |

|     |           |           |           |
|-----|-----------|-----------|-----------|
| C O | 1.849272  | 0.778382  | -0.881970 |
| H O | 0.396531  | -1.278333 | 2.069691  |
| H O | 0.396533  | 1.278339  | 2.069688  |
| H O | 0.524474  | 2.389148  | -0.168021 |
| H O | 0.524470  | -2.389148 | -0.168017 |
| H O | -0.572773 | 1.196861  | -2.069691 |
| H O | -0.572773 | -1.196860 | -2.069690 |
| H O | 1.908859  | -1.170850 | -1.904390 |
| H O | 2.716118  | -1.167892 | -0.339568 |
| H O | 1.908863  | 1.170846  | -1.904390 |
| H O | 2.716119  | 1.167888  | -0.339568 |

#### P-56+CH

B3LYP/6-31G(d) Geometry

|     |           |           |           |
|-----|-----------|-----------|-----------|
| C O | 0.255254  | -0.807924 | 1.118811  |
| C O | 0.604019  | 0.483339  | 1.185892  |
| C O | 0.848740  | 1.133923  | -0.158097 |
| C O | -0.436793 | 0.997019  | -1.025593 |
| C O | 0.172901  | -1.359939 | -0.286918 |
| C O | -0.841143 | -0.492830 | -1.089111 |
| C O | -2.240675 | -0.558139 | -0.487427 |
| O O | -2.909838 | -1.543069 | -0.303059 |
| C O | -1.689597 | 1.698966  | -0.444341 |
| O O | -2.673225 | 0.687604  | -0.158364 |
| C O | 1.560651  | -1.168816 | -0.960152 |
| C O | 1.968165  | 0.330880  | -0.882262 |
| H O | 0.045501  | -1.428599 | 1.985425  |
| H O | 0.717888  | 1.032539  | 2.116782  |
| H O | 1.131960  | 2.187968  | -0.064106 |
| H O | -0.223379 | 1.389297  | -2.025737 |
| H O | -0.144288 | -2.405602 | -0.307841 |
| H O | -0.901055 | -0.870079 | -2.116782 |
| H O | -2.138789 | 2.405602  | -1.149287 |
| H O | -1.479341 | 2.225854  | 0.491422  |
| H O | 1.511112  | -1.508477 | -2.002015 |
| H O | 2.297610  | -1.800020 | -0.453548 |
| H O | 2.124068  | 0.746699  | -1.885607 |
| H O | 2.909838  | 0.451098  | -0.337568 |

#### P-57+CH

B3LYP/6-31G(d) Geometry

|     |           |           |           |
|-----|-----------|-----------|-----------|
| C O | -1.239099 | 1.218963  | 0.998085  |
| C O | -1.392859 | -0.073378 | 1.311900  |
| C O | -1.345565 | -1.009810 | 0.125548  |
| C O | 0.019149  | -0.839118 | -0.609701 |
| C O | -1.039310 | 1.481464  | -0.478035 |
| C O | 0.217946  | 0.686299  | -0.930813 |
| C O | 1.500455  | 1.305413  | -0.364623 |
| O O | 1.532354  | 2.458629  | 0.025276  |
| C O | 1.203239  | -1.451336 | 0.152461  |
| C O | 2.770023  | 0.452425  | -0.345062 |
| C O | 2.528496  | -1.057198 | -0.511165 |
| C O | -2.264898 | 0.912074  | -1.243680 |
| C O | -2.466042 | -0.582041 | -0.863582 |
| H O | -1.246220 | 2.029408  | 1.721201  |
| H O | -1.549597 | -0.438700 | 2.323770  |
| H O | -1.475692 | -2.057541 | 0.419434  |
| H O | -0.058192 | -1.379020 | -1.563992 |
| H O | -0.896597 | 2.542633  | -0.689693 |
| H O | 0.323906  | 0.796219  | -2.023019 |
| H O | 1.091489  | -2.542633 | 0.183745  |
| H O | 1.199697  | -1.101128 | 1.194867  |
| H O | 3.261378  | 0.667848  | 0.611437  |

|     |           |           |           |
|-----|-----------|-----------|-----------|
| H O | 3.443672  | 0.843885  | -1.119828 |
| H O | 2.493295  | -1.327767 | -1.575651 |
| H O | 3.367610  | -1.615734 | -0.080190 |
| H O | -2.105820 | 1.024274  | -2.323770 |
| H O | -3.153084 | 1.500950  | -0.992067 |
| H O | -2.432795 | -1.222281 | -1.754231 |
| H O | -3.443672 | -0.737461 | -0.395579 |

#### P-58+CH

B3LYP/6-31G(d) Geometry

|     |           |           |           |
|-----|-----------|-----------|-----------|
| C O | -1.235965 | -0.920226 | -1.609894 |
| C O | -1.417265 | 0.405848  | -1.621068 |
| C O | -1.378421 | 1.044170  | -0.249749 |
| C O | -0.005467 | 0.725557  | 0.417179  |
| C O | -1.042382 | -1.509840 | -0.229237 |
| C O | 0.222127  | -0.836287 | 0.402958  |
| C O | 1.465733  | -1.264933 | -0.401789 |
| O O | 1.481364  | -2.298043 | -1.046392 |
| C O | 1.144551  | 1.530741  | -0.211195 |
| C O | 2.729610  | -0.404880 | -0.315111 |
| C O | 2.507428  | 1.005541  | 0.250481  |
| C O | 0.492561  | -1.366489 | 1.835450  |
| C O | -2.307491 | -1.149730 | 0.597450  |
| C O | -2.492406 | 0.392415  | 0.614790  |
| H O | -1.228694 | -1.545762 | -2.497766 |
| H O | -1.583681 | 0.990510  | -2.522323 |
| H O | -1.517006 | 2.130516  | -0.294804 |
| H O | -0.074969 | 1.037937  | 1.469285  |
| H O | -0.891374 | -2.590408 | -0.268012 |
| H O | 1.024692  | 2.590408  | 0.048124  |
| H O | 1.089132  | 1.465524  | -1.307354 |
| H O | 3.123956  | -0.355094 | -1.337350 |
| H O | 3.475407  | -0.967197 | 0.262750  |
| H O | 2.542728  | 0.994826  | 1.348393  |
| H O | 3.316997  | 1.668851  | -0.076205 |
| H O | -0.307277 | -1.071879 | 2.522323  |
| H O | 1.429272  | -0.967026 | 2.241988  |
| H O | 0.564196  | -2.460139 | 1.837404  |

#### P-59+CH

B3LYP/6-31G(d) Geometry

|     |           |           |           |
|-----|-----------|-----------|-----------|
| C O | -1.309204 | 1.770069  | 0.735770  |
| C O | -1.449202 | 0.591173  | 1.353107  |
| C O | -1.403055 | -0.604689 | 0.424866  |
| C O | -0.018637 | -0.622748 | -0.325585 |
| C O | -1.119085 | 1.664994  | -0.760966 |
| C O | 0.132550  | 0.785675  | -1.028277 |
| C O | 1.428072  | 1.510494  | -0.658432 |
| O O | 1.459411  | 2.703041  | -0.414412 |
| C O | 1.117496  | -0.831447 | 0.704887  |
| C O | 2.690983  | 0.659720  | -0.667182 |
| C O | 2.530043  | -0.672863 | 0.120021  |
| C O | 0.025027  | -1.762038 | -1.362730 |
| C O | -2.351131 | 0.926621  | -1.353333 |
| C O | -2.564500 | -0.410306 | -0.591670 |
| H O | -1.320752 | 2.731940  | 1.239723  |
| H O | -1.600357 | 0.478480  | 2.423807  |
| H O | -1.526370 | -1.549771 | 0.967017  |
| H O | -0.982224 | 2.643644  | -1.225775 |
| H O | 0.207406  | 0.616485  | -2.115411 |
| H O | 1.017138  | -1.825468 | 1.161241  |
| H O | 0.990318  | -0.101071 | 1.513893  |
| H O | 3.508180  | 1.275148  | -0.281925 |

|     |           |           |           |
|-----|-----------|-----------|-----------|
| H O | 2.921865  | 0.447053  | -1.721047 |
| H O | 2.772811  | -1.524041 | -0.525288 |
| H O | 3.255904  | -0.700824 | 0.940169  |
| H O | -0.711785 | -1.626224 | -2.160219 |
| H O | -0.169819 | -2.731940 | -0.887249 |
| H O | 1.007134  | -1.823897 | -1.844834 |
| H O | -2.186786 | 0.746880  | -2.423807 |
| H O | -3.235524 | 1.567195  | -1.272771 |
| H O | -2.626797 | -1.256833 | -1.283004 |
| H O | -3.508180 | -0.393133 | -0.036904 |

#### P-60+CH

B3LYP/6-31G(d) Geometry

|     |           |           |           |
|-----|-----------|-----------|-----------|
| C O | 1.128909  | -1.887335 | 0.496638  |
| C O | 1.311941  | -0.858957 | 1.333249  |
| C O | 1.345603  | 0.493337  | 0.658152  |
| C O | -0.032377 | 0.704931  | -0.085900 |
| C O | 0.970417  | -1.487916 | -0.953265 |
| C O | -0.251866 | -0.532316 | -1.052335 |
| C O | -1.569742 | -1.291864 | -0.830648 |
| O O | -1.625894 | -2.494212 | -1.008367 |
| C O | -1.202757 | 0.868324  | 0.918947  |
| C O | -2.821980 | -0.510461 | -0.441415 |
| C O | -2.555796 | 0.864206  | 0.200330  |
| C O | 0.038338  | 1.944119  | -0.882522 |
| N O | 0.079461  | 2.927372  | -1.500738 |
| C O | 2.237268  | -0.702287 | -1.386276 |
| C O | 2.488680  | 0.466304  | -0.393969 |
| H O | 1.087965  | -2.927372 | 0.806279  |
| H O | 1.447065  | -0.959805 | 2.406696  |
| H O | 1.491706  | 1.312723  | 1.368913  |
| H O | 0.796420  | -2.349289 | -1.599595 |
| H O | -0.317165 | -0.157340 | -2.084774 |
| H O | -1.062882 | 1.795032  | 1.486706  |
| H O | -1.154128 | 0.036305  | 1.632724  |
| H O | -3.384148 | -1.165556 | 0.233558  |
| H O | -3.439312 | -0.414643 | -1.345321 |
| H O | -2.563804 | 1.657198  | -0.557046 |
| H O | -3.359142 | 1.104816  | 0.905074  |
| H O | 2.101069  | -0.324087 | -2.406696 |
| H O | 3.093103  | -1.384160 | -1.410784 |

#### P-61+CH

B3LYP/6-31G(d) Geometry

|      |           |           |           |
|------|-----------|-----------|-----------|
| C O  | 1.329861  | -0.073849 | 1.315239  |
| C O  | 1.566154  | 1.065677  | 0.654242  |
| C O  | 1.454910  | 0.941178  | -0.849872 |
| C O  | 0.027433  | 0.434406  | -1.214367 |
| C O  | 0.998825  | -1.257595 | 0.425965  |
| C O  | -0.270125 | -0.837386 | -0.349741 |
| C O  | 2.474288  | -0.137864 | -1.310467 |
| C O  | -1.488262 | -0.705284 | 0.595533  |
| O O  | -1.456347 | -1.171126 | 1.716309  |
| C O  | -1.056706 | 1.515853  | -1.071425 |
| C O  | -2.724058 | 0.017033  | 0.068993  |
| C O  | -2.460451 | 0.904423  | -1.159294 |
| Cl O | -0.832959 | -2.232628 | -1.466166 |
| C O  | 2.180543  | -1.464656 | -0.558590 |
| H O  | 1.353225  | -0.178193 | 2.395327  |
| H O  | 1.833350  | 2.002528  | 1.135913  |
| H O  | 1.642607  | 1.891424  | -1.361502 |
| H O  | 0.042936  | 0.121384  | -2.264011 |
| H O  | 0.790515  | -2.158280 | 1.004207  |



|     |           |           |           |
|-----|-----------|-----------|-----------|
| H O | 3.491475  | 0.212239  | -1.107094 |
| H O | 2.393124  | -0.277170 | -2.395327 |
| H O | -0.909129 | 2.269577  | -1.854614 |
| H O | -0.943508 | 2.034271  | -0.108303 |
| H O | -3.099344 | 0.610306  | 0.911199  |
| H O | -3.491475 | -0.740090 | -0.135284 |
| H O | -2.543901 | 0.315536  | -2.080911 |
| H O | -3.224168 | 1.688329  | -1.216640 |
| H O | 1.938340  | -2.269577 | -1.258793 |
| H O | 3.052960  | -1.790711 | 0.016214  |

#### P-62+CH

B3LYP/6-31G(d) Geometry

|     |           |           |           |
|-----|-----------|-----------|-----------|
| C O | -1.081713 | -1.956964 | -0.850134 |
| C O | -1.307302 | -0.957981 | -1.710576 |
| C O | -1.381280 | 0.406646  | -1.065189 |
| C O | -0.006051 | 0.681240  | -0.332808 |
| C O | -0.941191 | -1.516104 | 0.589778  |
| C O | 0.272958  | -0.529953 | 0.679719  |
| C O | 1.562797  | -1.305634 | 0.320841  |
| O O | 1.617312  | -2.514091 | 0.451800  |
| C O | 1.136571  | 0.855789  | -1.372248 |
| C O | 2.804918  | -0.526611 | -0.109849 |
| C O | 2.511096  | 0.862904  | -0.699355 |
| C O | -0.116918 | 1.966921  | 0.380816  |
| C O | 0.513446  | -0.069993 | 2.140982  |
| N O | -0.196911 | 3.002293  | 0.902565  |
| C O | -2.257767 | -0.791041 | 0.979100  |
| C O | -2.521456 | 0.373825  | -0.012454 |
| H O | -1.001907 | -3.002293 | -1.132420 |
| H O | -1.443524 | -1.088255 | -2.780696 |
| H O | -1.550802 | 1.205564  | -1.793987 |
| H O | -0.748320 | -2.361227 | 1.252582  |
| H O | 0.966314  | 1.779440  | -1.936465 |
| H O | 1.077154  | 0.023257  | -2.084654 |
| H O | 3.318370  | -1.166482 | -0.836067 |
| H O | 3.474363  | -0.464401 | 0.758718  |
| H O | 2.532510  | 1.636366  | 0.078191  |
| H O | 3.288768  | 1.133013  | -1.422099 |
| H O | -0.323194 | 0.517770  | 2.525955  |
| H O | 1.409232  | 0.553574  | 2.230761  |
| H O | 0.645149  | -0.949192 | 2.780696  |
| H O | -2.207380 | -0.426130 | 2.010047  |
| H O | -3.073933 | -1.519849 | 0.948447  |
| H O | -2.576384 | 1.335620  | 0.508339  |
| H O | -3.474363 | 0.239002  | -0.533490 |

#### P-63+CH

B3LYP/6-31G(d) Geometry

|     |           |           |           |
|-----|-----------|-----------|-----------|
| C O | -1.123444 | -1.769102 | -1.128418 |
| C O | -1.303740 | -0.586019 | -1.726058 |
| C O | -1.388449 | 0.580936  | -0.766651 |
| C O | -0.053355 | 0.684359  | 0.066821  |
| C O | -0.999675 | -1.685381 | 0.377394  |
| C O | 0.231836  | -0.763721 | 0.692546  |
| C O | -2.589944 | 0.279512  | 0.170617  |
| C O | 1.488062  | -1.458207 | 0.109340  |
| O O | 1.527540  | -2.667976 | -0.027529 |
| C O | 1.087202  | 1.124459  | -0.888746 |
| C O | 2.732534  | -0.628100 | -0.206566 |
| C O | 2.481299  | 0.881295  | -0.302609 |
| C O | -0.209652 | 1.792894  | 1.132059  |
| C O | 0.531561  | -0.754194 | 2.216158  |

|     |           |           |           |
|-----|-----------|-----------|-----------|
| C O | -2.307318 | -1.048158 | 0.921527  |
| H O | -1.050440 | -2.717851 | -1.651487 |
| H O | -1.414595 | -0.455022 | -2.799689 |
| H O | -1.544045 | 1.530884  | -1.291957 |
| H O | -0.829032 | -2.667258 | 0.822761  |
| H O | -3.494468 | 0.195757  | -0.440664 |
| H O | -2.763763 | 1.104088  | 0.869261  |
| H O | 0.950267  | 2.185332  | -1.135959 |
| H O | 1.008726  | 0.570061  | -1.833772 |
| H O | 3.115900  | -1.021544 | -1.155786 |
| H O | 3.494468  | -0.874625 | 0.545089  |
| H O | 2.568067  | 1.353636  | 0.683981  |
| H O | 3.250337  | 1.348323  | -0.929204 |
| H O | -0.936507 | 1.550129  | 1.910088  |
| H O | -0.545740 | 2.717851  | 0.647579  |
| H O | 0.737252  | 2.015194  | 1.634206  |
| H O | -0.298626 | -0.349069 | 2.799689  |
| H O | 1.420945  | -0.161108 | 2.456728  |
| H O | 0.711781  | -1.779666 | 2.556425  |
| H O | -2.229611 | -0.881328 | 2.001961  |
| H O | -3.129016 | -1.758188 | 0.780085  |

#### P-64+CH

B3LYP/6-31G(d) Geometry

|     |           |           |           |
|-----|-----------|-----------|-----------|
| C O | 1.408934  | -1.519441 | 0.007134  |
| C O | 0.089233  | -1.083962 | -0.651906 |
| O O | 1.829232  | -0.571670 | 1.005091  |
| C O | 2.612635  | -1.479196 | -0.950561 |
| C O | 2.349443  | 0.476507  | 0.220536  |
| C O | 0.060271  | 0.442971  | -1.008476 |
| O O | 3.073450  | -0.124702 | -0.853134 |
| C O | -1.177185 | -1.411931 | 0.201141  |
| C O | 1.186015  | 1.272969  | -0.375957 |
| C O | -1.331301 | -0.408567 | 1.322116  |
| C O | -2.403059 | -1.246479 | -0.741808 |
| C O | -1.320932 | 1.040598  | -0.584062 |
| O O | 1.169394  | 2.487074  | -0.356151 |
| C O | -1.439696 | 0.860835  | 0.913049  |
| C O | -2.437532 | 0.213196  | -1.275239 |
| H O | 1.298871  | -2.487074 | 0.505011  |
| H O | 0.001357  | -1.666430 | -1.579607 |
| H O | 2.352766  | -1.702852 | -1.990365 |
| H O | 3.408542  | -2.159145 | -0.623201 |
| H O | 3.006042  | 1.110058  | 0.821362  |
| H O | 0.175840  | 0.567147  | -2.094463 |
| H O | -1.118819 | -2.441726 | 0.571377  |
| H O | -1.369329 | -0.719509 | 2.362396  |
| H O | -3.316768 | -1.480650 | -0.186477 |
| H O | -2.335203 | -1.965915 | -1.567515 |
| H O | -1.359198 | 2.090202  | -0.881957 |
| H O | -1.566957 | 1.709150  | 1.579411  |
| H O | -2.291078 | 0.238074  | -2.362396 |
| H O | -3.408542 | 0.677993  | -1.076331 |

#### P-65+CH

B3LYP/6-31G(d) Geometry

|     |           |           |           |
|-----|-----------|-----------|-----------|
| C O | -1.414397 | -1.422920 | -0.025632 |
| C O | -0.096915 | -0.811361 | 0.482844  |
| O O | -1.816500 | -0.826997 | -1.273085 |
| C O | -2.635664 | -1.093368 | 0.848398  |
| C O | -2.323539 | 0.415809  | -0.852102 |
| C O | -0.060730 | 0.763763  | 0.414684  |
| O O | -3.074397 | 0.175252  | 0.341283  |



|     |           |           |           |
|-----|-----------|-----------|-----------|
| C O | 1.153647  | -1.380242 | -0.260896 |
| C O | -1.156529 | 1.346056  | -0.503517 |
| C O | 1.288338  | -0.737091 | -1.623264 |
| C O | 2.402309  | -0.974853 | 0.571283  |
| C O | 1.326453  | 1.186311  | -0.199915 |
| O O | -1.128396 | 2.493321  | -0.902362 |
| C O | 1.403287  | 0.595067  | -1.589945 |
| C O | 2.482702  | 0.575079  | 0.636559  |
| C O | -0.286831 | 1.407903  | 1.803042  |
| H O | -1.301289 | -2.496471 | -0.201537 |
| H O | -0.003269 | -1.115407 | 1.535549  |
| H O | -2.401539 | -1.001316 | 1.913462  |
| H O | -3.433974 | -1.833641 | 0.716100  |
| H O | -2.960879 | 0.848388  | -1.626725 |
| H O | 1.078407  | -2.471871 | -0.323888 |
| H O | 1.304856  | -1.329767 | -2.533510 |
| H O | 3.299244  | -1.394382 | 0.104564  |
| H O | 2.331806  | -1.408687 | 1.576915  |
| H O | 1.382498  | 2.277046  | -0.214192 |
| H O | 1.518285  | 1.222163  | -2.469286 |
| H O | 2.436190  | 0.928501  | 1.672134  |
| H O | 3.433974  | 0.932968  | 0.229732  |
| H O | 0.443767  | 1.045468  | 2.533510  |
| H O | -1.288229 | 1.182740  | 2.183616  |
| H O | -0.196506 | 2.496471  | 1.729859  |

#### P-66+CH

B3LYP/6-31G(d) Geometry

|     |           |           |           |
|-----|-----------|-----------|-----------|
| C O | 1.360834  | -0.957197 | 0.244559  |
| C O | 0.064621  | -0.700853 | -0.583873 |
| O O | 1.729360  | 0.212536  | 1.000931  |
| C O | 2.668149  | -1.163946 | -0.539966 |
| C O | 2.322977  | 1.027823  | 0.020483  |
| C O | 0.049638  | 0.739066  | -1.222849 |
| O O | 3.107471  | 0.172383  | -0.814762 |
| C O | -1.177714 | -0.777889 | 0.390472  |
| C O | 1.232739  | 1.646203  | -0.858462 |
| C O | -1.192884 | 0.424262  | 1.313218  |
| C O | -2.501988 | -0.685154 | -0.423818 |
| C O | -1.272478 | 1.486150  | -0.825730 |
| O O | 1.307664  | 2.793930  | -1.249074 |
| C O | -1.289949 | 1.599253  | 0.682252  |
| C O | -0.050288 | -1.785875 | -1.675497 |
| C O | -2.476901 | 0.614555  | -1.270602 |
| H O | 1.188182  | -1.763876 | 0.963149  |
| H O | 2.575160  | -1.707721 | -1.480417 |
| H O | 3.405725  | -1.672639 | 0.093928  |
| H O | 2.946926  | 1.791940  | 0.490071  |
| H O | 0.070127  | 0.651272  | -2.317794 |
| H O | -1.141911 | -1.722265 | 0.946231  |
| H O | -1.162613 | 0.311703  | 2.393219  |
| H O | -3.332410 | -0.663980 | 0.288767  |
| H O | -2.654566 | -1.569897 | -1.049451 |
| H O | -1.279839 | 2.459300  | -1.321152 |
| H O | -1.338118 | 2.561901  | 1.183243  |
| H O | -0.044531 | -2.793930 | -1.240085 |
| H O | 0.772773  | -1.725058 | -2.393219 |
| H O | -0.971708 | -1.681002 | -2.252026 |
| H O | -2.386966 | 0.388437  | -2.340809 |
| H O | -3.405725 | 1.180373  | -1.144492 |

#### P-67+CH

B3LYP/6-31G(d) Geometry

|     |           |           |           |
|-----|-----------|-----------|-----------|
| C O | -1.383104 | 0.863354  | 0.517065  |
| C O | -0.050656 | 0.697398  | -0.286533 |
| O O | -1.824712 | -0.409786 | 0.991821  |
| C O | -2.595736 | 1.305461  | -0.322995 |
| C O | -2.419382 | -0.974299 | -0.157920 |
| C O | -0.099738 | -0.531388 | -1.282562 |
| O O | -3.135757 | 0.067642  | -0.808699 |
| C O | 1.184035  | 0.476212  | 0.682117  |
| C O | -1.318911 | -1.453078 | -1.108019 |
| C O | 1.139995  | -0.926603 | 1.244403  |
| C O | 2.488306  | 0.582109  | -0.158877 |
| C O | 1.200811  | -1.385464 | -1.101778 |
| O O | -1.406538 | -2.504349 | -1.706766 |
| C O | 1.199289  | -1.893345 | 0.322236  |
| C O | 0.159566  | 1.951454  | -1.028718 |
| N O | 0.301195  | 2.955106  | -1.597167 |
| C O | 2.430286  | -0.461410 | -1.307221 |
| H O | -1.212952 | 1.505866  | 1.384125  |
| H O | -2.346279 | 1.953796  | -1.165867 |
| H O | -3.340571 | 1.802706  | 0.308842  |
| H O | -3.088924 | -1.789149 | 0.125404  |
| H O | -0.140008 | -0.163846 | -2.315209 |
| H O | 1.164160  | 1.243123  | 1.462667  |
| H O | 1.098324  | -1.101200 | 2.315209  |
| H O | 3.334894  | 0.385593  | 0.505492  |
| H O | 2.612721  | 1.596143  | -0.550649 |
| H O | 1.180424  | -2.193955 | -1.834768 |
| H O | 1.204244  | -2.955106 | 0.550170  |
| H O | 2.353736  | 0.035925  | -2.281458 |
| H O | 3.340571  | -1.068507 | -1.329307 |

#### P-68+CH

B3LYP/6-31G(d) Geometry

|      |           |           |           |
|------|-----------|-----------|-----------|
| C O  | 1.407320  | -1.188867 | -1.064806 |
| C O  | 0.085455  | -0.409136 | -1.158166 |
| O O  | 1.793972  | -1.375341 | 0.308759  |
| C O  | 2.624381  | -0.421666 | -1.617231 |
| C O  | 2.334316  | -0.113559 | 0.633306  |
| C O  | 0.068964  | 0.861222  | -0.243162 |
| O O  | 3.112424  | 0.301593  | -0.477441 |
| C O  | -1.170990 | -1.265051 | -0.807543 |
| C O  | 1.177253  | 0.871836  | 0.845867  |
| C O  | -1.313486 | -1.399498 | 0.693261  |
| C O  | -2.409949 | -0.475592 | -1.318560 |
| C O  | -1.319981 | 0.984783  | 0.445055  |
| O O  | 1.116610  | 1.593445  | 1.815532  |
| C O  | -1.422749 | -0.233940 | 1.340443  |
| C O  | -2.444872 | 0.912079  | -0.620259 |
| Cl O | 0.411076  | 2.371209  | -1.264006 |
| H O  | 1.297843  | -2.181442 | -1.510215 |
| H O  | -0.024249 | -0.086900 | -2.199811 |
| H O  | 2.370252  | 0.281260  | -2.415293 |
| H O  | 3.405651  | -1.107009 | -1.965224 |
| H O  | 2.950959  | -0.184191 | 1.532041  |
| H O  | -1.102076 | -2.237016 | -1.307850 |
| H O  | -1.352202 | -2.371209 | 1.176751  |
| H O  | -3.316288 | -1.048987 | -1.099727 |
| H O  | -2.353955 | -0.364325 | -2.408264 |
| H O  | -1.350741 | 1.918067  | 1.008751  |
| H O  | -1.537694 | -0.134262 | 2.415293  |
| H O  | -2.316050 | 1.722384  | -1.344425 |

H O -3.405651 1.076436 -0.122985

### P-69+CH

B3LYP/6-31G(d) Geometry

C O 1.389577 0.852881 -1.076825  
C O 0.052520 0.672318 -0.282066  
O O 1.835093 -0.406029 -1.582375  
C O 2.598508 1.273240 -0.223876  
C O 2.405729 -1.001733 -0.438332  
C O 0.103651 -0.541497 0.759232  
O O 3.117122 0.021604 0.251729  
C O -1.153401 0.412448 -1.278800  
C O 1.288464 -1.501035 0.480487  
C O -1.086019 -1.003845 -1.803018  
C O -2.483694 0.533975 -0.484162  
C O -1.207319 -1.394503 0.552356  
O O 1.352055 -2.592551 1.007455  
C O -1.162662 -1.944144 -0.855712  
C O -0.188376 1.964123 0.382761  
C O 0.266304 -0.095261 2.229989  
N O -0.347652 3.012099 0.859011  
C O -2.464001 -0.493418 0.678818  
H O 1.220796 1.516714 -1.927890  
H O 2.348970 1.915641 0.623335  
H O 3.355023 1.768006 -0.843579  
H O 3.075778 -1.813422 -0.729289  
H O -1.113048 1.158145 -2.079009  
H O -1.016121 -1.206198 -2.867390  
H O -3.310004 0.332720 -1.172356  
H O -2.615822 1.554264 -0.111165  
H O -1.212267 -2.187479 1.302702  
H O -1.155676 -3.012099 -1.051890  
H O -0.552168 0.552665 2.553434  
H O 1.204276 0.448048 2.381245  
H O 0.287257 -0.983826 2.867390  
H O -2.472325 0.015058 1.648461  
H O -3.355023 -1.128515 0.652869

### P-70+CH

B3LYP/6-31G(d) Geometry

C O -1.382260 -1.079157 -0.544704  
C O -0.054642 -0.739240 0.190487  
O O -1.746165 -0.037162 -1.466895  
C O -2.662530 -1.128294 0.313872  
C O -2.295143 0.931124 -0.610730  
C O -0.064016 0.741121 0.786757  
O O -3.115699 0.232034 0.328277  
C O 1.125864 -0.803771 -0.863452  
C O -1.190551 1.624887 0.190914  
C O 1.100366 0.398027 -1.784203  
C O 2.493596 -0.716075 -0.124895  
C O 1.281062 1.451050 0.351322  
O O -1.235256 2.822414 0.393904  
C O 1.241996 1.570348 -1.156821  
C O 0.168021 -1.842734 1.249764  
C O 2.503313 0.574903 0.733941  
C O -0.256971 0.815401 2.318633  
H O -1.251130 -1.994747 -1.129210  
H O -2.520225 -1.469219 1.340897  
H O -3.420610 -1.758247 -0.167572  
H O -2.888887 1.650624 -1.178575  
H O 1.055281 -1.746642 -1.418478  
H O 1.018849 0.285066 -2.861319

H O 3.284389 -0.683961 -0.880815  
H O 2.682971 -1.605308 0.483960  
H O 1.325307 2.426987 0.839550  
H O 1.277199 2.534559 -1.655299  
H O 0.233093 -2.822414 0.758748  
H O -0.644133 -1.893434 1.978508  
H O 1.089416 -1.703065 1.816122  
H O 2.480787 0.338443 1.804280  
H O 3.420610 1.148596 0.565172  
H O 0.546450 0.310539 2.861319  
H O -1.208395 0.370407 2.628524  
H O -0.270988 1.866009 2.622604

### TS-1+BU

B3LYP/6-31G(d) Geometry

C O -0.283925 -1.433381 1.604729  
C O -0.268171 1.449547 1.558008  
C O 0.869739 0.716032 1.800581  
C O 0.867482 -0.692017 1.846027  
H O -0.219874 -2.518795 1.583799  
H O -1.243068 -1.057151 1.947107  
H O -0.209380 2.518795 1.377944  
H O -1.254017 1.068370 1.795466  
H O 1.831739 1.222758 1.767274  
H O 1.828726 -1.202260 1.840130  
C O -0.812733 -0.979355 -0.382479  
C O -0.880507 0.399252 -0.611356  
C O 0.144962 1.073902 -1.335971  
N O 0.979185 1.613082 -1.947107  
H O -1.749675 -1.521378 -0.293746  
H O -0.004874 -1.538112 -0.841767  
H O -1.831739 0.917366 -0.543744

### TS-2+BU

B3LYP/6-31G(d) Geometry

C O -2.122930 0.614583 0.137538  
C O -0.309749 -1.565665 0.719136  
C O -1.171887 -1.592271 -0.351367  
C O -2.081042 -0.550333 -0.622960  
H O -2.801824 1.410211 -0.160682  
H O -1.950146 0.565353 1.208171  
H O 0.489653 -2.293967 0.813059  
H O -0.527087 -0.994771 1.613342  
H O -1.029206 -2.354199 -1.115484  
H O -2.590727 -0.560434 -1.584754  
C O -0.244232 1.483153 -0.152933  
C O 0.783533 0.675181 0.337270  
C O 1.714721 -0.014196 -0.557021  
O O 2.801824 -0.464582 -0.231391  
H O -0.538642 2.354199 0.426291  
H O -0.318372 1.618993 -1.228988  
H O 1.095723 0.754051 1.376028  
H O 1.362197 -0.079381 -1.613342

### TS-3+BU

B3LYP/6-31G(d) Geometry

C O 3.099565 -0.346114 0.065591  
C O 0.915445 1.473358 0.809742  
C O 1.718697 1.676732 -0.280594  
C O 2.798328 0.831125 -0.622099  
H O 3.948128 -0.932653 -0.278746  
H O 2.947519 -0.391454 1.139941  
H O -0.002858 2.036999 0.944168

|     |           |           |           |
|-----|-----------|-----------|-----------|
| H O | 1.217435  | 0.850768  | 1.643236  |
| H O | 1.428883  | 2.438966  | -1.000806 |
| H O | 3.274443  | 0.994850  | -1.587195 |
| C O | 1.550711  | -1.579278 | -0.342565 |
| C O | 0.384458  | -1.177490 | 0.323767  |
| C O | -0.687462 | -0.512330 | -0.336668 |
| O O | -1.797627 | -0.304598 | 0.211240  |
| B O | -2.917378 | 0.581673  | -0.487677 |
| H O | 2.082481  | -2.438966 | 0.057738  |
| H O | 1.562062  | -1.526727 | -1.427788 |
| H O | 0.220651  | -1.459362 | 1.361028  |
| H O | -0.554742 | -0.191191 | -1.377980 |
| H O | -2.906335 | 1.614178  | 0.158839  |
| H O | -2.559221 | 0.733712  | -1.643236 |
| H O | -3.948128 | -0.037368 | -0.359155 |

#### TS-4+BU

B3LYP/6-31G(d) Geometry

|     |           |           |           |
|-----|-----------|-----------|-----------|
| C O | -0.994488 | 1.461195  | 0.305802  |
| C O | -1.783925 | 0.376325  | 0.749554  |
| C O | -2.072740 | -0.713192 | -0.063546 |
| C O | -0.471032 | 1.522045  | -0.959650 |
| H O | -0.637075 | 2.164385  | 1.053868  |
| H O | -1.981695 | 0.299864  | 1.816243  |
| H O | -2.643513 | -1.542272 | 0.347175  |
| H O | -2.217279 | -0.561255 | -1.128998 |
| H O | 0.264781  | 2.275664  | -1.223535 |
| H O | -0.910049 | 0.982480  | -1.790305 |
| C O | 0.744347  | -0.674829 | -0.806625 |
| C O | -0.209315 | -1.603390 | -0.416066 |
| N O | 1.631540  | -0.132198 | 0.183378  |
| O O | 1.326396  | -0.274146 | 1.377687  |
| O O | 2.643513  | 0.457515  | -0.214490 |
| H O | 1.092391  | -0.514558 | -1.816243 |
| H O | -0.587494 | -2.275664 | -1.180388 |
| H O | -0.122008 | -2.011536 | 0.583057  |

#### TS-5+BU

B3LYP/6-31G(d) Geometry

|     |           |           |           |
|-----|-----------|-----------|-----------|
| C O | 1.329887  | -1.426094 | 0.326797  |
| C O | 2.083972  | -0.326898 | 0.781535  |
| C O | 2.271666  | 0.804109  | 0.008217  |
| C O | 0.737061  | -1.442068 | -0.918765 |
| H O | 1.034164  | -2.177611 | 1.055512  |
| H O | 2.329535  | -0.282336 | 1.841085  |
| H O | 2.765385  | 1.675283  | 0.431317  |
| H O | 2.345025  | 0.725814  | -1.070933 |
| H O | 0.057697  | -2.242298 | -1.193464 |
| H O | 1.175817  | -0.905346 | -1.751783 |
| C O | 0.183147  | 1.510675  | -0.340355 |
| C O | -0.612625 | 0.465657  | -0.785667 |
| C O | -1.676712 | -0.084210 | 0.110848  |
| F O | -1.255273 | -0.213114 | 1.390085  |
| F O | -2.139182 | -1.292022 | -0.293157 |
| F O | -2.765385 | 0.733256  | 0.144873  |
| H O | 0.545567  | 2.242298  | -1.054577 |
| H O | 0.078258  | 1.864539  | 0.678538  |
| H O | -0.848401 | 0.372737  | -1.841085 |

#### TS-6+BU

B3LYP/6-31G(d) Geometry

|     |          |           |           |
|-----|----------|-----------|-----------|
| C O | 1.296743 | -1.665639 | -0.058844 |
| C O | 2.344440 | -0.785818 | 0.266858  |

|     |           |           |           |
|-----|-----------|-----------|-----------|
| C O | 2.602510  | 0.379475  | -0.450899 |
| C O | 0.448828  | -1.478657 | -1.130678 |
| H O | 1.046149  | -2.438352 | 0.665478  |
| H O | 2.827723  | -0.913658 | 1.233858  |
| H O | 3.402296  | 1.033788  | -0.112100 |
| H O | 2.444325  | 0.400053  | -1.524291 |
| H O | -0.395068 | -2.143290 | -1.286763 |
| H O | 0.746580  | -0.900741 | -1.996265 |
| C O | 0.915922  | 1.597379  | -0.133196 |
| C O | -0.187580 | 1.002785  | -0.746096 |
| B O | -1.265267 | 0.133354  | -0.066299 |
| C O | -2.572071 | -0.276949 | -0.883366 |
| C O | -1.246322 | -0.148515 | 1.501889  |
| H O | 1.408012  | 2.438352  | -0.620486 |
| H O | 0.972633  | 1.621240  | 0.951360  |
| H O | -0.290362 | 1.211322  | -1.815638 |
| H O | -2.477829 | -0.180005 | -1.972606 |
| H O | -3.402296 | 0.379713  | -0.578018 |
| H O | -2.911256 | -1.297658 | -0.659948 |
| H O | -1.920946 | 0.568667  | 1.996265  |
| H O | -0.266902 | -0.042495 | 1.983262  |
| H O | -1.637260 | -1.143577 | 1.752575  |

#### TS-7+BU

B3LYP/6-31G(d) Geometry

|      |           |           |           |
|------|-----------|-----------|-----------|
| C O  | -1.030017 | -0.247163 | -1.576270 |
| C O  | -2.034089 | 0.358591  | -0.793606 |
| C O  | -2.288152 | 0.001892  | 0.528885  |
| C O  | -0.230633 | -1.268589 | -1.124571 |
| H O  | -0.775379 | 0.228334  | -2.520718 |
| H O  | -2.480376 | 1.275429  | -1.173781 |
| H O  | -3.070747 | 0.532868  | 1.065427  |
| H O  | -2.168131 | -1.031667 | 0.838881  |
| H O  | 0.608368  | -1.621553 | -1.715735 |
| H O  | -0.519782 | -1.905016 | -0.297846 |
| C O  | -0.613945 | 0.604153  | 1.576920  |
| C O  | 0.498007  | -0.154442 | 1.196962  |
| B O  | 1.586427  | 0.296872  | 0.246824  |
| Cl O | 3.070747  | -0.679478 | 0.017226  |
| Cl O | 1.550165  | 1.905016  | -0.542287 |
| H O  | -1.102221 | 0.368292  | 2.520718  |
| H O  | -0.638527 | 1.656799  | 1.311963  |
| H O  | 0.620161  | -1.125503 | 1.677368  |

#### TS-8+BU

B3LYP/6-31G(d) Geometry

|      |           |           |           |
|------|-----------|-----------|-----------|
| C O  | -1.256263 | -1.271378 | -0.139629 |
| C O  | -0.246700 | 1.178926  | -1.385291 |
| C O  | -1.399415 | 1.140639  | -0.647251 |
| C O  | -1.922309 | -0.044583 | -0.081874 |
| H O  | -1.731697 | -2.124798 | 0.339294  |
| H O  | -0.693303 | -1.537447 | -1.031294 |
| H O  | 0.203562  | 2.124798  | -1.670414 |
| H O  | 0.178542  | 0.298971  | -1.850253 |
| H O  | -1.867683 | 2.081628  | -0.363503 |
| H O  | -2.759230 | 0.053681  | 0.607222  |
| C O  | 0.393191  | -1.018533 | 0.961273  |
| C O  | 1.366037  | -0.286944 | 0.274360  |
| C O  | 1.775743  | 1.069238  | 0.639969  |
| O O  | 2.759230  | 1.663465  | 0.235451  |
| Cl O | 2.342948  | -1.123802 | -0.921800 |
| H O  | 0.548116  | -2.089216 | 1.060119  |
| H O  | -0.015220 | -0.545200 | 1.850253  |

H O 1.093392 1.514878 1.397516

### TS-9+BU

B3LYP/6-31G(d) Geometry

C O -2.081809 -0.306056 -0.244938  
C O -1.338676 -1.417090 0.205744  
C O -0.280180 -1.306607 1.071918  
C O -1.735752 1.005028 0.083824  
H O -2.791627 -0.465642 -1.054494  
H O -1.517813 -2.376055 -0.277537  
H O 0.368506 -2.152618 1.276277  
H O -0.170547 -0.460322 1.737619  
H O -2.330468 1.812889 -0.337013  
H O -1.350700 1.226014 1.076043  
C O 1.104407 0.604497 -0.118201  
C O 0.087322 1.302535 -0.782268  
C O 1.732370 -0.549175 -0.771913  
O O 2.791627 -1.057491 -0.429973  
C O 1.787571 1.178435 1.096517  
H O -0.156018 1.001212 -1.797951  
H O 0.019631 2.376055 -0.616067  
H O 1.183144 -0.922848 -1.665283  
H O 2.366872 0.408046 1.611468  
H O 2.489090 1.974199 0.810868  
H O 1.069118 1.621899 1.797951

### TS-10+BU

B3LYP/6-31G(d) Geometry

C O -1.436985 -1.782215 -0.679609  
C O -0.234236 -2.290890 -0.158194  
C O 0.400069 -1.710641 0.919935  
C O -2.031610 -0.632707 -0.170066  
H O -1.774849 -2.161468 -1.642506  
H O 0.303435 -3.035715 -0.741855  
H O 1.407046 -2.004147 1.200077  
H O -0.154284 -1.172452 1.679277  
H O -2.919417 -0.241915 -0.661397  
H O -1.999083 -0.436026 0.897049  
C O 0.599754 0.588265 0.140271  
C O -0.622221 0.934417 -0.456759  
C O 1.756024 0.174527 -0.656971  
O O 2.919417 0.224295 -0.290418  
C O -1.442190 2.070712 0.128683  
H O 0.828109 0.951971 1.140671  
H O -0.654303 0.862703 -1.542924  
H O 1.495919 -0.187899 -1.679277  
H O -0.991409 3.035715 -0.136488  
H O -2.471702 2.076391 -0.243020  
H O -1.474969 2.016593 1.222830

### TS-11+BU

B3LYP/6-31G(d) Geometry

C O -0.281622 1.743448 -0.649436  
C O -1.460444 1.389417 0.025581  
C O -1.465926 0.447727 1.047056  
C O 0.943951 1.181795 -0.328906  
H O -0.372688 2.310310 -1.574128  
H O -2.411271 1.702430 -0.400812  
H O -2.406909 0.098332 1.461862  
H O -0.612793 0.352268 1.710177  
H O 1.812703 1.369039 -0.953806  
H O 1.177663 0.900245 0.691106  
C O -0.656654 -1.381798 0.069465

C O 0.515840 -1.040612 -0.633539  
C O -1.900458 -1.645895 -0.684442  
O O -2.829029 -2.310310 -0.269962  
C O 1.789466 -1.472250 -0.147430  
N O 2.829029 -1.803784 0.260020  
H O -0.568396 -1.905315 1.017394  
H O 0.453349 -0.909710 -1.710177  
H O -1.931097 -1.178554 -1.695300

### TS-12+BU

B3LYP/6-31G(d) Geometry

C O 3.002408 0.724833 -0.145463  
C O 0.933247 -0.969605 -1.438279  
C O 1.937515 -1.464570 -0.656188  
C O 2.956161 -0.667544 -0.072187  
H O 3.847277 1.223886 0.323190  
H O 2.628168 1.235426 -1.029534  
H O 0.095559 -1.592251 -1.738684  
H O 0.966360 0.024038 -1.869831  
H O 1.898028 -2.512252 -0.364859  
H O 3.630235 -1.161115 0.625861  
C O 1.471484 1.342896 1.010838  
C O 0.269779 1.268520 0.298645  
C O -0.686003 0.228190 0.488956  
O O -1.798008 0.179009 -0.083919  
B O -2.723335 -1.114437 0.047772  
Cl O -0.082245 2.512252 -0.880907  
H O 1.913915 2.325012 1.148452  
H O 1.566488 0.685348 1.869831  
H O -0.432723 -0.546555 1.222292  
H O -2.559212 -1.681906 -1.018387  
H O -2.288305 -1.743359 0.996980  
H O -3.847277 -0.697106 0.188989

### TS-13+BU

B3LYP/6-31G(d) Geometry

C O -3.044104 0.200561 0.065442  
C O -0.881211 -1.421804 1.247819  
C O -1.789590 -1.916781 0.352109  
C O -2.858559 -1.160892 -0.184085  
H O -3.901711 0.684811 -0.395682  
H O -2.791053 0.606691 1.041461  
H O 0.013888 -1.979272 1.507405  
H O -1.069874 -0.526368 1.827940  
H O -1.607939 -2.900734 -0.075659  
H O -3.434714 -1.614172 -0.988681  
C O -1.504100 1.112181 -0.865609  
C O -0.329253 1.005209 -0.102038  
C O 0.668826 0.056710 -0.484703  
O O 1.799736 -0.000153 0.064130  
B O 2.809278 -1.186240 -0.252044  
C O -0.059560 1.936684 1.051685  
H O -2.018079 2.071312 -0.855979  
H O -1.538008 0.609932 -1.827940  
H O 0.465362 -0.621410 -1.321552  
H O 2.700560 -1.917698 0.718217  
H O 2.417751 -1.703308 -1.284267  
H O 3.901711 -0.674426 -0.329815  
H O -0.975294 2.147920 1.618619  
H O 0.324140 2.900734 0.692314  
H O 0.691659 1.520756 1.727068

### TS-14+BU

**B3LYP/6-31G(d) Geometry**

C O 2.922417 0.745582 -0.049226  
C O 0.343971 1.778324 0.853750  
C O 1.001513 2.283789 -0.239783  
C O 2.265989 1.821967 -0.655907  
H O 3.897380 0.470617 -0.443870  
H O 2.842086 0.615195 1.026345  
H O -0.699287 2.015024 1.040543  
H O 0.862515 1.254816 1.647755  
H O 0.461744 2.956450 -0.902981  
H O 2.637479 2.173351 -1.616829  
C O 1.841090 -0.900422 -0.465800  
C O 0.607440 -0.834950 0.218473  
C O -0.614259 -0.465520 -0.406201  
O O -1.733859 -0.618035 0.144973  
B O -3.056525 -0.014900 -0.496342  
C O 2.836213 -1.969977 -0.035524  
H O 1.780550 -0.763535 -1.544389  
H O 0.537338 -1.219173 1.234587  
H O -0.592094 -0.057872 -1.425043  
H O -3.289497 0.960575 0.197289  
H O -2.777241 0.275188 -1.647755  
H O -3.897380 -0.876724 -0.386644  
H O 2.464832 -2.956450 -0.337619  
H O 2.962356 -1.984359 1.052503  
H O 3.818541 -1.829932 -0.495381

**TS-15+BU**

**B3LYP/6-31G(d) Geometry**

C O 2.708490 0.815821 -0.310825  
C O 0.165885 1.164467 1.011706  
C O 0.522298 1.904369 -0.099216  
C O 1.766409 1.757529 -0.731818  
H O 3.624187 0.695251 -0.883471  
H O 2.826013 0.607565 0.747876  
H O -0.856793 1.167040 1.376507  
H O 0.907983 0.775543 1.699021  
H O -0.245781 2.487302 -0.602735  
H O 1.906014 2.236125 -1.699021  
C O 1.754510 -1.031354 -0.606421  
C O 0.563358 -1.119919 0.154908  
C O -0.721752 -0.974762 -0.462482  
O O -1.779891 -1.315164 0.104240  
B O -3.218682 -1.023724 -0.538022  
C O 2.870204 -1.848451 -0.207360  
N O 3.784531 -2.487302 0.121780  
H O 1.649275 -0.931244 -1.683787  
H O 0.587704 -1.568628 1.143215  
H O -0.782742 -0.550618 -1.473748  
H O -3.703305 -0.220251 0.232473  
H O -2.995775 -0.574769 -1.647452  
H O -3.784531 -2.090639 -0.524568

**TS-16+BU**

**B3LYP/6-31G(d) Geometry**

C O 1.368151 -1.525116 -0.810772  
C O 0.513842 -0.078862 1.601899  
C O 1.543291 0.338850 0.809239  
C O 1.994734 -0.373827 -0.330414  
H O 1.815941 -2.024093 -1.667394  
H O 0.912446 -2.210100 -0.100174  
H O 0.108768 0.568245 2.373750  
H O 0.123042 -1.088658 1.578456

H O 1.964407 1.327022 0.980587  
H O 2.735867 0.111433 -0.962671  
C O -0.355943 -0.936642 -1.583837  
C O -1.236455 -0.357442 -0.640864  
C O -1.432491 1.054826 -0.604917  
C O -2.080561 -1.189810 0.150549  
N O -1.588916 2.210100 -0.627530  
N O -2.735867 -1.910146 0.792463  
H O -0.603052 -1.941781 -1.915773  
H O 0.001198 -0.283968 -2.373750

**TS-17+BU**

**B3LYP/6-31G(d) Geometry**

C O -0.279164 -1.432240 1.534938  
C O -0.279101 1.432246 1.534850  
C O 0.877663 0.702117 1.758372  
C O 0.877632 -0.702149 1.758408  
H O -0.225473 -2.509914 1.410185  
H O -1.242304 -1.057134 1.863816  
H O -0.225359 2.509914 1.410058  
H O -1.242255 1.057205 1.863764  
H O 1.835354 1.214949 1.711754  
H O 1.835300 -1.215026 1.711816  
C O -0.875419 -0.705903 -0.522899  
C O -0.875359 0.705904 -0.522911  
C O 0.092843 -1.454971 -1.265602  
C O 0.092963 1.454868 -1.265646  
N O 0.864365 2.088781 -1.863816  
N O 0.864192 -2.088966 -1.863754  
H O -1.835354 -1.199266 -0.406346  
H O -1.835261 1.199345 -0.406400

**TS-18+BU**

**B3LYP/6-31G(d) Geometry**

C O 0.490947 -1.441953 1.459726  
C O 0.307024 1.424140 1.489640  
C O 1.504635 0.760271 1.723817  
C O 1.596431 -0.640819 1.683344  
H O 0.609539 -2.508491 1.290071  
H O -0.492643 -1.145879 1.804478  
H O 0.300158 2.508491 1.419384  
H O -0.638553 0.982485 1.786356  
H O 2.427813 1.334552 1.710473  
H O 2.588136 -1.085367 1.672875  
C O -0.248249 -0.633233 -0.590766  
C O -0.151780 0.775037 -0.569093  
C O -1.537560 -1.242374 -0.513227  
C O 0.942652 1.399941 -1.252430  
N O 1.834794 1.903636 -1.804478  
N O -2.588136 -1.737321 -0.421459  
H O 0.522093 -1.207768 -1.091110  
H O -1.071197 1.352399 -0.547522

**TS-19+BU**

**B3LYP/6-31G(d) Geometry**

C O -1.373321 -1.099622 1.194967  
C O 0.297927 1.219088 1.401798  
C O 0.573288 0.062221 2.100842  
C O -0.247046 -1.075726 2.009068  
H O -1.932444 -2.026647 1.091764  
H O -1.981948 -0.205831 1.097987  
H O 1.023457 2.026647 1.365452  
H O -0.717000 1.495093 1.140308



|     |           |           |           |
|-----|-----------|-----------|-----------|
| H O | 1.551336  | -0.046537 | 2.563885  |
| H O | 0.136604  | -2.014316 | 2.404340  |
| C O | -0.690716 | -0.757045 | -0.806512 |
| C O | 0.255279  | 0.282725  | -0.813980 |
| C O | -2.032264 | -0.533571 | -1.475728 |
| C O | 1.650603  | -0.008385 | -0.855781 |
| N O | 2.787717  | -0.262543 | -0.900767 |
| H O | -0.292302 | -1.764432 | -0.885372 |
| H O | -0.032492 | 1.262631  | -1.184942 |
| H O | -1.936116 | -0.642196 | -2.563885 |
| H O | -2.412864 | 0.475982  | -1.280264 |
| H O | -2.787717 | -1.250886 | -1.139562 |

#### TS-20+BU

##### B3LYP/6-31G(d) Geometry

|     |           |           |           |
|-----|-----------|-----------|-----------|
| C O | -1.765720 | -1.145205 | 1.164202  |
| C O | 0.150365  | 0.990367  | 1.453838  |
| C O | 0.275504  | -0.197807 | 2.129541  |
| C O | -0.673215 | -1.235124 | 2.024437  |
| H O | -2.437008 | -1.997333 | 1.082779  |
| H O | -2.263679 | -0.188201 | 1.033592  |
| H O | 0.969126  | 1.703154  | 1.428729  |
| H O | -0.811785 | 1.366563  | 1.129861  |
| H O | 1.219175  | -0.419454 | 2.623713  |
| H O | -0.414000 | -2.207375 | 2.438789  |
| C O | -0.960539 | -1.060047 | -0.727654 |
| C O | -0.123978 | 0.050843  | -0.925636 |
| C O | 1.287791  | -0.160331 | -1.001236 |
| C O | -0.661197 | 1.336786  | -1.526482 |
| N O | 2.437008  | -0.332209 | -1.107615 |
| H O | -1.947833 | -1.017903 | -1.182692 |
| H O | -0.511077 | -2.046915 | -0.727374 |
| H O | -1.694235 | 1.508610  | -1.203202 |
| H O | -0.664728 | 1.283550  | -2.623713 |
| H O | -0.063222 | 2.207375  | -1.242904 |

#### TS-21+BU

##### B3LYP/6-31G(d) Geometry

|     |           |           |           |
|-----|-----------|-----------|-----------|
| C O | 0.928119  | -2.077187 | -0.660050 |
| C O | 1.973271  | -1.394140 | -0.011508 |
| C O | 1.745557  | -0.532685 | 1.042444  |
| C O | -0.400132 | -1.909915 | -0.297521 |
| H O | 1.153682  | -2.576650 | -1.600479 |
| H O | 2.956643  | -1.400560 | -0.477543 |
| H O | 2.540656  | 0.099485  | 1.425660  |
| H O | 0.896380  | -0.665094 | 1.702408  |
| H O | -1.180330 | -2.373375 | -0.892423 |
| H O | -0.669080 | -1.740731 | 0.739363  |
| C O | 0.221649  | 1.000151  | 0.053556  |
| C O | -0.748687 | 0.243162  | -0.606885 |
| C O | 1.315498  | 1.641992  | -0.691866 |
| O O | 1.979227  | 2.576650  | -0.282444 |
| C O | -2.155680 | 0.293004  | -0.079434 |
| F O | -2.193012 | 0.106176  | 1.263513  |
| F O | -2.735546 | 1.490310  | -0.325550 |
| F O | -2.956643 | -0.641981 | -0.640362 |
| H O | 0.000357  | 1.426388  | 1.027924  |
| H O | -0.702413 | 0.169273  | -1.689627 |
| H O | 1.496580  | 1.208671  | -1.702408 |

#### TS-22+BU

##### B3LYP/6-31G(d) Geometry

|     |           |          |           |
|-----|-----------|----------|-----------|
| C O | -0.216020 | 2.213176 | -0.304548 |
|-----|-----------|----------|-----------|

|     |           |           |           |
|-----|-----------|-----------|-----------|
| C O | -1.497726 | 1.924392  | 0.186593  |
| C O | -2.274528 | 0.878891  | -0.313722 |
| C O | 0.374720  | 1.507740  | -1.337090 |
| H O | 0.401846  | 2.903530  | 0.266367  |
| H O | -1.799053 | 2.391553  | 1.122460  |
| H O | -3.242136 | 0.693101  | 0.146036  |
| H O | -2.246370 | 0.648491  | -1.374251 |
| H O | 1.401432  | 1.712399  | -1.623587 |
| H O | -0.219553 | 1.008149  | -2.091820 |
| C O | -1.290954 | -0.915532 | 0.144815  |
| C O | -0.068818 | -0.888285 | -0.544987 |
| B O | 1.303914  | -0.434564 | -0.017339 |
| C O | 2.610938  | -0.738815 | -0.882853 |
| C O | 1.506036  | 0.057657  | 1.485847  |
| C O | -2.378799 | -1.891453 | -0.277742 |
| H O | -1.248457 | -0.734381 | 1.217340  |
| H O | -0.117813 | -1.290787 | -1.563446 |
| H O | 2.416564  | -0.946967 | -1.943013 |
| H O | 3.110436  | -1.630413 | -0.471776 |
| H O | 3.356771  | 0.065785  | -0.825487 |
| H O | 1.844633  | -0.797982 | 2.091820  |
| H O | 0.605303  | 0.450218  | 1.972424  |
| H O | 2.294468  | 0.816411  | 1.577683  |
| H O | -2.125766 | -2.903530 | 0.063469  |
| H O | -2.477602 | -1.930546 | -1.368889 |
| H O | -3.356771 | -1.640854 | 0.146507  |

#### TS-23+BU

##### B3LYP/6-31G(d) Geometry

|      |           |           |           |
|------|-----------|-----------|-----------|
| C O  | 0.377032  | -2.238979 | -0.243192 |
| C O  | 1.552554  | -1.773794 | 0.371711  |
| C O  | 2.177015  | -0.580318 | 0.005038  |
| C O  | -0.242381 | -1.570215 | -1.274909 |
| H O  | -0.151631 | -3.062267 | 0.231469  |
| H O  | 1.860814  | -2.255312 | 1.297552  |
| H O  | 3.078062  | -0.293783 | 0.541371  |
| H O  | 2.179360  | -0.281964 | -1.039338 |
| H O  | -1.215688 | -1.884808 | -1.637627 |
| H O  | 0.295073  | -0.886204 | -1.919370 |
| C O  | 0.926605  | 0.968255  | 0.525336  |
| C O  | -0.269868 | 0.836994  | -0.205626 |
| B O  | -1.554556 | 0.218056  | 0.290274  |
| Cl O | -3.078062 | 0.382290  | -0.642769 |
| Cl O | -1.687887 | -0.519803 | 1.919370  |
| C O  | 1.855343  | 2.132633  | 0.212874  |
| H O  | 0.866189  | 0.715097  | 1.581766  |
| H O  | -0.293491 | 1.323034  | -1.182824 |
| H O  | 1.420694  | 3.062267  | 0.600606  |
| H O  | 1.991708  | 2.259500  | -0.867151 |
| H O  | 2.841210  | 2.015279  | 0.673311  |

#### TS-24+BU

##### B3LYP/6-31G(d) Geometry

|     |           |          |           |
|-----|-----------|----------|-----------|
| C O | 0.719683  | 1.804888 | -0.838214 |
| C O | 1.658506  | 1.387558 | 0.131158  |
| C O | 1.314921  | 0.569982 | 1.190956  |
| C O | -0.616081 | 1.475288 | -0.762805 |
| H O | 1.104051  | 2.237979 | -1.758734 |
| H O | 2.712390  | 1.543613 | -0.086022 |
| H O | 2.088313  | 0.167767 | 1.839293  |
| H O | 0.313373  | 0.569433 | 1.608865  |
| H O | -1.286375 | 1.690578 | -1.589771 |
| H O | -1.097173 | 1.301047 | 0.193465  |



|   |   |           |           |           |
|---|---|-----------|-----------|-----------|
| C | O | 0.593134  | -1.235718 | 0.058903  |
| C | O | -0.459591 | -0.866646 | -0.762814 |
| N | O | 1.855546  | -1.552803 | -0.588377 |
| N | O | -1.798671 | -1.032863 | -0.236639 |
| O | O | 2.652839  | -2.237979 | 0.051841  |
| O | O | 2.053706  | -1.094280 | -1.717494 |
| O | O | -1.941113 | -1.024441 | 0.993869  |
| O | O | -2.712390 | -1.139112 | -1.053535 |
| H | O | 0.446580  | -1.749566 | 0.997136  |
| H | O | -0.401218 | -0.882605 | -1.839293 |

#### TS-25+BU

##### B3LYP/6-31G(d) Geometry

|   |   |           |           |           |
|---|---|-----------|-----------|-----------|
| C | O | 0.655227  | 1.791487  | 0.884246  |
| C | O | -0.749579 | 1.768953  | 0.924099  |
| C | O | -1.511735 | 1.567186  | -0.207694 |
| C | O | 1.357276  | 1.585944  | -0.303621 |
| H | O | 1.197438  | 1.748383  | 1.825735  |
| H | O | -1.233018 | 1.715016  | 1.896748  |
| H | O | -2.582457 | 1.402065  | -0.134457 |
| H | O | -1.153756 | 1.842580  | -1.192011 |
| H | O | 2.442080  | 1.542235  | -0.283626 |
| H | O | 0.945038  | 1.960973  | -1.235309 |
| C | O | -0.509135 | -0.554143 | -0.922805 |
| C | O | 0.890226  | -0.372432 | -0.859801 |
| C | O | -1.349255 | -1.214497 | 0.066401  |
| C | O | 1.912700  | -1.043440 | 0.042714  |
| O | O | 3.049492  | -1.173060 | -0.363752 |
| O | O | 1.564583  | -1.415212 | 1.275145  |
| O | O | -1.059212 | -1.493762 | 1.232228  |
| O | O | -2.576793 | -1.519482 | -0.417320 |
| H | O | -0.974737 | -0.450607 | -1.896748 |
| H | O | 1.349751  | -0.235703 | -1.834779 |
| H | O | 0.579651  | -1.372600 | 1.403692  |
| H | O | -3.049492 | -1.960973 | 0.312464  |

#### TS-26+BU

##### B3LYP/6-31G(d) Geometry

|   |   |           |           |           |
|---|---|-----------|-----------|-----------|
| C | O | 0.219589  | -1.377808 | 1.675023  |
| C | O | 0.527135  | 1.505914  | 1.549246  |
| C | O | 1.577242  | 0.669637  | 1.834300  |
| C | O | 1.429545  | -0.726780 | 1.950596  |
| H | O | 0.188308  | -2.459697 | 1.779878  |
| H | O | -0.716094 | -0.886764 | 1.931182  |
| H | O | 0.700011  | 2.545889  | 1.289668  |
| H | O | -0.504319 | 1.232099  | 1.731594  |
| H | O | 2.586962  | 1.073081  | 1.819151  |
| H | O | 2.331061  | -1.328693 | 2.034788  |
| C | O | -0.061736 | -1.152885 | -0.296214 |
| C | O | -0.212709 | 0.219414  | -0.670335 |
| C | O | 1.030397  | -1.908190 | -0.861544 |
| C | O | 0.787173  | 0.916347  | -1.412862 |
| C | O | -1.514703 | 0.795604  | -0.581560 |
| N | O | 1.597803  | 1.476000  | -2.034788 |
| N | O | 1.902897  | -2.545889 | -1.287906 |
| N | O | -2.586962 | 1.236529  | -0.460495 |
| H | O | -0.992595 | -1.715836 | -0.262572 |

#### TS-27+BU

##### B3LYP/6-31G(d) Geometry

|   |   |           |           |          |
|---|---|-----------|-----------|----------|
| C | O | -1.738036 | -0.542128 | 1.088962 |
| C | O | 0.360726  | 1.390727  | 1.394619 |
| C | O | 0.371858  | 0.196544  | 2.076617 |

|   |   |           |           |           |
|---|---|-----------|-----------|-----------|
| C | O | -0.678296 | -0.735799 | 1.974830  |
| H | O | -2.495573 | -1.318757 | 1.006485  |
| H | O | -2.129008 | 0.460303  | 0.936416  |
| H | O | 1.248479  | 2.014823  | 1.355321  |
| H | O | -0.565622 | 1.874487  | 1.112473  |
| H | O | 1.290637  | -0.117713 | 2.568002  |
| H | O | -0.531626 | -1.722585 | 2.408746  |
| C | O | -0.870118 | -0.576589 | -0.790679 |
| C | O | -0.057147 | 0.566936  | -0.955933 |
| C | O | -0.272954 | -1.965201 | -0.887705 |
| C | O | 1.351963  | 0.404411  | -1.134048 |
| C | O | -0.657743 | 1.861695  | -1.473975 |
| N | O | 2.495573  | 0.277380  | -1.329573 |
| H | O | -1.864408 | -0.476333 | -1.225987 |
| H | O | 0.619726  | -2.058360 | -0.262477 |
| H | O | 0.031042  | -2.178383 | -1.920529 |
| H | O | -0.991839 | -2.731419 | -0.581130 |
| H | O | -1.662117 | 2.012219  | -1.060301 |
| H | O | -0.754298 | 1.840870  | -2.568002 |
| H | O | -0.047152 | 2.731419  | -1.215049 |

#### TS-28+BU

##### B3LYP/6-31G(d) Geometry

|   |   |           |           |           |
|---|---|-----------|-----------|-----------|
| C | O | -1.459000 | -1.206144 | 1.176196  |
| C | O | 0.323751  | 1.021335  | 1.437214  |
| C | O | 0.533592  | -0.155211 | 2.120076  |
| C | O | -0.348549 | -1.245563 | 2.016199  |
| H | O | -2.075713 | -2.097364 | 1.085310  |
| H | O | -2.017567 | -0.279659 | 1.076106  |
| H | O | 1.093916  | 1.786421  | 1.405006  |
| H | O | -0.670103 | 1.346961  | 1.156047  |
| H | O | 1.498473  | -0.319426 | 2.594650  |
| H | O | -0.025820 | -2.205084 | 2.415393  |
| C | O | -0.741415 | -0.987436 | -0.779118 |
| C | O | 0.151265  | 0.108344  | -0.870364 |
| C | O | -2.073840 | -0.944171 | -1.505827 |
| C | O | 1.549691  | -0.193113 | -0.879051 |
| C | O | -0.254018 | 1.427768  | -1.504673 |
| N | O | 2.687681  | -0.447642 | -0.918816 |
| H | O | -0.267265 | -1.964484 | -0.780384 |
| H | O | -1.915729 | -0.946143 | -2.592716 |
| H | O | -2.654814 | -0.047991 | -1.264503 |
| H | O | -2.687681 | -1.815796 | -1.260051 |
| H | O | -1.217506 | 1.779760  | -1.121071 |
| H | O | -0.355810 | 1.326822  | -2.594650 |
| H | O | 0.489836  | 2.205084  | -1.312770 |

#### TS-29+BU

##### B3LYP/6-31G(d) Geometry

|   |   |           |           |           |
|---|---|-----------|-----------|-----------|
| C | O | -1.408079 | -0.536439 | 1.080209  |
| C | O | 0.399304  | 1.672976  | 0.997664  |
| C | O | 0.645297  | 0.559908  | 1.794243  |
| C | O | -0.241941 | -0.528104 | 1.824407  |
| H | O | -2.010016 | -1.437981 | 1.010871  |
| H | O | -1.942998 | 0.380858  | 0.866845  |
| H | O | 1.156876  | 2.446920  | 0.909491  |
| H | O | -0.617446 | 2.016304  | 0.836723  |
| H | O | 1.636569  | 0.431456  | 2.222343  |
| H | O | 0.097620  | -1.454223 | 2.283772  |
| C | O | -0.531305 | -0.287294 | -1.082088 |
| C | O | 0.347332  | 0.828491  | -1.017779 |
| C | O | -1.834339 | -0.026869 | -1.622502 |
| C | O | 0.015830  | -1.693925 | -1.264131 |

|     |           |           |           |
|-----|-----------|-----------|-----------|
| C O | 1.756464  | 0.618435  | -1.183958 |
| N O | 2.900111  | 0.449470  | -1.320320 |
| N O | -2.900111 | 0.179274  | -2.045996 |
| H O | -0.011480 | 1.773346  | -1.415294 |
| H O | 0.843836  | -1.872124 | -0.572900 |
| H O | 0.399764  | -1.824836 | -2.283772 |
| H O | -0.756610 | -2.446920 | -1.092114 |

#### TS-30+BU

B3LYP/6-31G(d) Geometry

|     |           |           |           |
|-----|-----------|-----------|-----------|
| C O | -1.804682 | -0.548487 | 1.299985  |
| C O | 0.145926  | 1.535901  | 1.343805  |
| C O | 0.299038  | 0.385484  | 2.097165  |
| C O | -0.665610 | -0.633802 | 2.091874  |
| H O | -2.471003 | -1.403349 | 1.222868  |
| H O | -2.279205 | 0.411383  | 1.121961  |
| H O | 0.967465  | 2.240413  | 1.252511  |
| H O | -0.838036 | 1.948626  | 1.152883  |
| H O | 1.271622  | 0.169566  | 2.533116  |
| H O | -0.401894 | -1.595502 | 2.524823  |
| C O | -0.951837 | -0.419134 | -0.718626 |
| C O | -0.087974 | 0.701853  | -0.815858 |
| C O | -0.448391 | -1.757980 | -0.819234 |
| C O | 1.323487  | 0.489866  | -0.974893 |
| C O | -0.632393 | 1.979836  | -1.438359 |
| N O | 2.471003  | 0.366882  | -1.129822 |
| N O | -0.068598 | -2.855024 | -0.898111 |
| H O | -1.950464 | -0.291824 | -1.128990 |
| H O | -1.671161 | 2.143895  | -1.131690 |
| H O | -0.612929 | 1.910133  | -2.533116 |
| H O | -0.044173 | 2.855024  | -1.150740 |

#### TS-31+BU

B3LYP/6-31G(d) Geometry

|     |           |           |           |
|-----|-----------|-----------|-----------|
| C O | -1.349997 | 1.855428  | 0.365881  |
| C O | -0.023069 | 2.283826  | 0.193620  |
| C O | 0.770120  | 1.800341  | -0.827966 |
| C O | -1.907895 | 0.864835  | -0.436760 |
| H O | -1.862060 | 2.134424  | 1.284853  |
| H O | 0.442067  | 2.858570  | 0.992387  |
| H O | 1.836082  | 2.004131  | -0.852688 |
| H O | 0.341740  | 1.484596  | -1.771594 |
| H O | -2.914302 | 0.518602  | -0.213786 |
| H O | -1.649203 | 0.812078  | -1.489107 |
| C O | 0.586374  | -0.581689 | -0.505791 |
| C O | -0.722440 | -0.887820 | -0.066780 |
| C O | 1.766004  | -0.476412 | 0.356307  |
| O O | 2.914302  | -0.639682 | -0.031854 |
| C O | -0.990235 | -1.091633 | 1.418747  |
| C O | -1.524080 | -1.820067 | -0.969308 |
| H O | 0.833874  | -0.800743 | -1.543690 |
| H O | 1.564749  | -0.246814 | 1.424530  |
| H O | -0.593618 | -0.276773 | 2.029461  |
| H O | -2.065580 | -1.164898 | 1.613113  |
| H O | -0.528693 | -2.025854 | 1.767180  |
| H O | -1.203880 | -2.858570 | -0.807705 |
| H O | -2.597887 | -1.776058 | -0.758098 |
| H O | -1.370629 | -1.592205 | -2.029461 |

#### TS-32+BU

B3LYP/6-31G(d) Geometry

|     |           |          |           |
|-----|-----------|----------|-----------|
| C O | -0.226525 | 1.673519 | 0.181340  |
| C O | 1.030186  | 1.350774 | -0.363585 |

|     |           |           |           |
|-----|-----------|-----------|-----------|
| C O | 1.165551  | 0.486652  | -1.460712 |
| C O | -1.406567 | 1.229497  | -0.366050 |
| H O | -0.251111 | 2.154690  | 1.156292  |
| H O | 1.918315  | 1.609728  | 0.208817  |
| H O | 2.165619  | 0.259653  | -1.821176 |
| H O | 0.417343  | 0.530531  | -2.248244 |
| H O | -2.344813 | 1.343519  | 0.168257  |
| H O | -1.491927 | 0.931627  | -1.403319 |
| C O | 0.555519  | -1.318854 | -0.867548 |
| C O | -0.763428 | -1.307589 | -0.319796 |
| C O | 1.719006  | -1.686393 | 0.005635  |
| O O | 2.743326  | -2.154690 | -0.440462 |
| C O | -1.865980 | -1.626813 | -1.169455 |
| C O | -0.981007 | -1.355432 | 1.093576  |
| N O | -2.743326 | -1.862922 | -1.899439 |
| N O | -1.129875 | -1.407003 | 2.248244  |
| H O | 0.635379  | -1.742974 | -1.866294 |
| H O | 1.590302  | -1.488342 | 1.088226  |

#### TS-33+BU

B3LYP/6-31G(d) Geometry

|     |           |           |           |
|-----|-----------|-----------|-----------|
| C O | 0.365185  | -1.425344 | 1.480653  |
| C O | 0.365045  | 1.425314  | 1.480893  |
| C O | 1.532706  | 0.699358  | 1.703963  |
| C O | 1.532771  | -0.699321 | 1.703855  |
| H O | 0.413337  | -2.501310 | 1.341572  |
| H O | -0.594313 | -1.054657 | 1.823958  |
| H O | 0.413091  | 2.501310  | 1.342007  |
| H O | -0.594405 | 1.054467  | 1.824158  |
| H O | 2.487641  | 1.217302  | 1.665835  |
| H O | 2.487756  | -1.217167 | 1.665658  |
| C O | -0.209852 | -0.724530 | -0.575075 |
| C O | -0.209958 | 0.724838  | -0.574921 |
| C O | -1.476247 | -1.408435 | -0.559510 |
| C O | 0.845862  | -1.409102 | -1.275420 |
| C O | 0.845641  | 1.409720  | -1.275143 |
| N O | -2.487447 | -1.980227 | -0.508832 |
| C O | -1.476465 | 1.408537  | -0.559222 |
| N O | 1.699920  | -1.975650 | -1.824158 |
| N O | 1.699602  | 1.976514  | -1.823777 |
| N O | -2.487756 | 1.980157  | -0.508429 |

#### TS-34+BU

B3LYP/6-31G(d) Geometry

|     |           |           |           |
|-----|-----------|-----------|-----------|
| C O | 0.693898  | -1.141724 | 1.539763  |
| C O | 0.537562  | 1.733527  | 1.571928  |
| C O | 1.746105  | 1.075061  | 1.553131  |
| C O | 1.833714  | -0.326602 | 1.580196  |
| H O | 0.842152  | -2.218363 | 1.544604  |
| H O | -0.200929 | -0.821479 | 2.066886  |
| H O | 0.479786  | 2.795630  | 1.353884  |
| H O | -0.356712 | 1.295040  | 1.996280  |
| H O | 2.648444  | 1.640489  | 1.333508  |
| H O | 2.803996  | -0.782391 | 1.399113  |
| C O | -0.172268 | -0.862936 | -0.275493 |
| C O | -0.448090 | 0.538104  | -0.480960 |
| C O | 0.864270  | -1.427249 | -1.117799 |
| C O | 0.361774  | 1.333089  | -1.349871 |
| C O | -1.746453 | 1.043165  | -0.167108 |
| N O | 1.016912  | 1.976203  | -2.066886 |
| N O | 1.681270  | -1.937404 | -1.767960 |
| N O | -2.803996 | 1.436790  | 0.125254  |
| C O | -1.372628 | -1.801241 | -0.101726 |

H O -1.901964 -1.898766 -1.055457  
H O -2.074293 -1.403405 0.635367  
H O -1.048473 -2.795630 0.212756

#### TS-35+BU

B3LYP/6-31G(d) Geometry

C O -0.996408 2.051671 -0.694044  
C O 0.389474 2.014543 -0.896677  
C O 1.009437 0.924023 -1.526275  
C O -1.823034 1.037690 -1.138150  
H O -1.398628 2.794012 -0.009127  
H O 1.007574 2.743435 -0.377245  
H O 2.091889 0.929590 -1.624557  
H O 0.500480 0.454045 -2.363174  
H O -2.858156 0.984118 -0.814539  
H O -1.576951 0.430310 -2.000482  
C O 0.691802 -0.760551 -0.407600  
C O -0.683175 -0.812273 0.022406  
C O 1.710892 -0.379647 0.634800  
O O 2.858156 -0.768670 0.606496  
C O -1.564750 -1.782218 -0.553820  
C O -1.065332 -0.315514 1.313169  
C O 1.165424 -1.820557 -1.387783  
N O -2.273786 -2.560225 -1.053085  
N O -1.359288 0.094241 2.363174  
H O 1.349077 0.303375 1.427570  
H O 2.171131 -1.588565 -1.743085  
H O 1.210449 -2.794012 -0.887070  
H O 0.488352 -1.916744 -2.240538

#### TS-36+BU

B3LYP/6-31G(d) Geometry

C O -1.995769 1.417063 -0.058326  
C O -0.889396 2.282814 -0.021701  
C O 0.257914 2.041698 -0.745058  
C O -1.948743 0.193841 -0.734774  
H O -2.805688 1.592121 0.646897  
H O -0.881905 3.076150 0.724098  
H O 1.158335 2.624681 -0.578563  
H O 0.239350 1.468740 -1.662684  
H O -2.828790 -0.443673 -0.685061  
H O -1.431617 0.132536 -1.689214  
C O 0.738006 -0.406713 -0.153758  
C O -0.528692 -0.946260 0.220279  
C O 1.626337 0.256372 0.811967  
O O 2.828790 0.427285 0.639760  
C O 1.398398 -0.826841 -1.444723  
C O -0.969534 -0.861348 1.679116  
C O -0.914974 -2.280170 -0.423530  
H O 1.156333 0.577168 1.761538  
H O 2.296807 -0.228999 -1.611376  
H O 1.709402 -1.880187 -1.410430  
H O 0.729938 -0.724529 -2.310045  
H O -0.907654 0.152828 2.079067  
H O -2.007181 -1.196684 1.782116  
H O -0.347748 -1.510263 2.310045  
H O -0.252367 -3.076150 -0.056913  
H O -1.940023 -2.561577 -0.161621  
H O -0.835894 -2.264683 -1.513563

#### TS-37+BU

B3LYP/6-31G(d) Geometry

C O -2.805920 0.976936 -0.878999

C O -0.096927 1.110110 -1.750439  
C O -0.655241 2.114305 -0.959503  
C O -1.987887 2.063101 -0.549782  
H O -3.794780 0.898756 -0.436133  
H O -2.711129 0.488006 -1.843333  
H O 0.971301 1.103609 -1.947289  
H O -0.700402 0.603451 -2.494948  
H O 0.003556 2.848671 -0.501668  
H O -2.323701 2.756817 0.216375  
C O -1.749357 -0.687274 0.035682  
C O -0.468331 -0.837313 -0.617858  
C O 0.738267 -0.507197 0.123938  
O O 1.850766 -0.930504 -0.235498  
C O -2.767662 -1.660794 -0.279753  
C O -0.336257 -1.824892 -1.755049  
C O -1.788477 -0.222882 1.403970  
N O -3.595715 -2.427092 -0.561084  
N O -1.817307 0.177409 2.494948  
H O 0.675876 0.137958 1.007398  
H O -1.179673 -1.760012 -2.448947  
H O -0.316278 -2.848671 -1.362362  
H O 0.596018 -1.662350 -2.298677  
B O 3.227520 -0.451680 0.460230  
H O 3.764428 0.168585 -0.433456  
H O 2.887015 0.225057 1.409098  
H O 3.794780 -1.480668 0.733690

#### TS-38+BU

B3LYP/6-31G(d) Geometry

C O -1.451671 -0.672662 1.276819  
C O 0.549552 1.345933 1.293474  
C O 0.676887 0.198241 2.064311  
C O -0.318395 -0.790071 2.068813  
H O -2.147421 -1.502708 1.192047  
H O -1.890270 0.298163 1.076779  
H O 1.386493 2.033237 1.208623  
H O -0.425131 1.794220 1.136205  
H O 1.643355 -0.035587 2.504989  
H O -0.091584 -1.750266 2.527118  
C O -0.525641 -0.564835 -0.788929  
C O 0.322004 0.588211 -0.816883  
C O -1.817594 -0.427755 -1.402724  
C O 0.086352 -1.956287 -0.864868  
C O 1.730370 0.344647 -0.981649  
C O -0.170908 1.892364 -1.433241  
N O 2.870852 0.168398 -1.139376  
N O -2.870852 -0.334389 -1.891909  
H O 0.893703 -2.055615 -0.134494  
H O 0.514749 -2.133425 -1.858995  
H O -0.662288 -2.728157 -0.670914  
H O -1.190119 2.117410 -1.106134  
H O -0.186229 1.816648 -2.527118  
H O 0.478675 2.728157 -1.161254

#### TS-39+BU

B3LYP/6-31G(d) Geometry

C O -1.516567 -0.648336 1.334675  
C O 0.310605 1.529530 1.336245  
C O 0.541687 0.394675 2.100354  
C O -0.359353 -0.679328 2.099550  
H O -2.129385 -1.541028 1.248022  
H O -2.045278 0.284421 1.171835  
H O 1.083241 2.288282 1.250878

|     |           |           |           |
|-----|-----------|-----------|-----------|
| H O | -0.699734 | 1.888209  | 1.172977  |
| H O | 1.531520  | 0.238468  | 2.522032  |
| H O | -0.033778 | -1.627315 | 2.520626  |
| C O | -0.739031 | -0.377720 | -0.767269 |
| C O | 0.181041  | 0.718697  | -0.766360 |
| C O | -2.101644 | -0.220749 | -1.433948 |
| C O | -0.201241 | -1.710204 | -0.854412 |
| C O | 1.586722  | 0.420395  | -0.852550 |
| C O | -0.209433 | 2.033947  | -1.432303 |
| N O | 2.732342  | 0.233291  | -0.941639 |
| N O | 0.181909  | -2.805876 | -0.944369 |
| H O | -1.989146 | -0.129237 | -2.522032 |
| H O | -2.628529 | 0.669185  | -1.078290 |
| H O | -2.732342 | -1.090709 | -1.236524 |
| H O | -1.177598 | 2.398123  | -1.077180 |
| H O | -0.279096 | 1.908156  | -2.520548 |
| H O | 0.537716  | 2.805876  | -1.233609 |

#### TS-40+BU

B3LYP/6-31G(d) Geometry

|     |           |           |           |
|-----|-----------|-----------|-----------|
| C O | -1.507917 | -0.571848 | 1.176528  |
| C O | 0.548014  | 1.389183  | 1.438309  |
| C O | 0.608351  | 0.192343  | 2.118205  |
| C O | -0.423582 | -0.757993 | 2.032931  |
| H O | -2.252807 | -1.361052 | 1.105768  |
| H O | -1.919419 | 0.425343  | 1.047224  |
| H O | 1.418534  | 2.035551  | 1.377494  |
| H O | -0.400241 | 1.858312  | 1.208270  |
| H O | 1.548432  | -0.104817 | 2.578505  |
| H O | -0.250084 | -1.745698 | 2.454841  |
| C O | -0.716278 | -0.548244 | -0.768639 |
| C O | 0.142285  | 0.586822  | -0.869631 |
| C O | -2.057860 | -0.472171 | -1.491331 |
| C O | -0.068347 | -1.923591 | -0.838892 |
| C O | 1.548203  | 0.369511  | -1.024113 |
| C O | -0.359624 | 1.919803  | -1.399773 |
| N O | 2.690203  | 0.203547  | -1.199156 |
| H O | -1.897586 | -0.496492 | -2.578505 |
| H O | -2.617925 | 0.439144  | -1.264542 |
| H O | -2.690203 | -1.328166 | -1.236272 |
| H O | 0.810284  | -1.991142 | -0.192820 |
| H O | 0.263552  | -2.135053 | -1.864454 |
| H O | -0.775731 | -2.707041 | -0.547516 |
| H O | -1.284665 | 2.231563  | -0.901678 |
| H O | -0.575045 | 1.864836  | -2.476230 |
| H O | 0.383994  | 2.707041  | -1.251226 |

#### TS-41+BU

B3LYP/6-31G(d) Geometry

|     |           |           |           |
|-----|-----------|-----------|-----------|
| C O | 2.080181  | -0.227701 | -0.924864 |
| C O | 1.506222  | 1.055749  | -0.778830 |
| C O | 0.956652  | 1.493354  | 0.401067  |
| C O | 2.035327  | -1.181461 | 0.082681  |
| H O | 2.358888  | -0.544634 | -1.927977 |
| H O | 1.342394  | 1.643377  | -1.680076 |
| H O | 0.381837  | 2.413437  | 0.441548  |
| H O | 1.279643  | 1.098400  | 1.356674  |
| H O | 2.430414  | -2.174529 | -0.118014 |
| H O | 2.101009  | -0.881484 | 1.123675  |
| C O | -0.656962 | -0.343487 | 0.905450  |
| C O | -0.051446 | -1.486557 | 0.351121  |
| C O | -1.501019 | -0.135795 | -0.291794 |

|     |           |           |           |
|-----|-----------|-----------|-----------|
| C O | -0.803776 | -1.344592 | -0.981884 |
| O O | -2.430414 | 0.578210  | -0.594435 |
| H O | -0.748739 | 0.010515  | 1.927977  |
| H O | 0.189580  | -2.413437 | 0.860406  |
| H O | -0.182399 | -1.093336 | -1.850947 |
| H O | -1.490592 | -2.156366 | -1.246877 |

#### TS-42+BU

B3LYP/6-31G(d) Geometry

|     |           |           |           |
|-----|-----------|-----------|-----------|
| C O | -1.980742 | -0.735389 | -0.131704 |
| C O | -1.386440 | -0.732423 | 1.152157  |
| C O | -0.478036 | 0.212530  | 1.551420  |
| C O | -1.597533 | 0.153269  | -1.133254 |
| H O | -2.582618 | -1.598963 | -0.407396 |
| H O | -1.542820 | -1.605405 | 1.783276  |
| H O | 0.078702  | 0.097173  | 2.476286  |
| H O | -0.436979 | 1.192409  | 1.094410  |
| H O | -2.063014 | 0.053225  | -2.111287 |
| H O | -1.340637 | 1.178538  | -0.880336 |
| C O | 1.223888  | 0.205859  | -0.453319 |
| C O | 0.384860  | -0.302808 | -1.471264 |
| C O | 1.660602  | -1.152226 | -0.061722 |
| C O | 0.709491  | -1.765165 | -1.126232 |
| O O | 2.515470  | -1.607489 | 0.668945  |
| C O | 1.819933  | 1.553115  | -0.198458 |
| H O | 0.293043  | 0.100285  | -2.476286 |
| H O | -0.129834 | -2.354004 | -0.733936 |
| H O | 1.228806  | -2.343334 | -1.898823 |
| H O | 1.070427  | 2.354004  | -0.240674 |
| H O | 2.582618  | 1.791525  | -0.952939 |
| H O | 2.305987  | 1.584813  | 0.781727  |

#### TS-43+BU

B3LYP/6-31G(d) Geometry

|     |           |           |           |
|-----|-----------|-----------|-----------|
| C O | -2.051902 | -0.734806 | -0.837308 |
| C O | -1.546601 | -1.922570 | -0.269164 |
| C O | -1.007884 | -1.954583 | 0.997911  |
| C O | -1.955515 | 0.490021  | -0.192945 |
| H O | -2.317505 | -0.749838 | -1.892739 |
| H O | -1.402345 | -2.781339 | -0.921597 |
| H O | -0.470942 | -2.829661 | 1.351442  |
| H O | -1.345949 | -1.271637 | 1.768392  |
| H O | -2.293707 | 1.383393  | -0.711538 |
| H O | -2.034669 | 0.547548  | 0.887706  |
| C O | 0.673195  | -0.241447 | 0.890781  |
| C O | 0.188869  | 0.789605  | 0.048829  |
| C O | 1.469643  | -0.844531 | -0.197653 |
| C O | 0.890811  | 0.196089  | -1.192181 |
| O O | 2.317505  | -1.705160 | -0.286443 |
| C O | 0.096134  | 2.260085  | 0.377080  |
| H O | 0.790299  | -0.283920 | 1.970679  |
| H O | 0.229820  | -0.204532 | -1.970679 |
| H O | 1.659431  | 0.826048  | -1.657396 |
| H O | 1.107795  | 2.679267  | 0.468720  |
| H O | -0.416756 | 2.431897  | 1.329844  |
| H O | -0.423578 | 2.829661  | -0.399516 |

#### TS-44+BU

B3LYP/6-31G(d) Geometry

|     |           |          |           |
|-----|-----------|----------|-----------|
| C O | -0.880479 | 1.946437 | -0.794522 |
| C O | -2.010297 | 1.536659 | -0.058891 |
| C O | -1.903128 | 0.971568 | 1.202122  |
| C O | 0.407245  | 1.776847 | -0.323082 |

|     |           |           |           |
|-----|-----------|-----------|-----------|
| H O | -1.024308 | 2.217042  | -1.838724 |
| H O | -2.964854 | 1.477322  | -0.577334 |
| H O | -2.779775 | 0.548762  | 1.684120  |
| H O | -1.111910 | 1.283445  | 1.875934  |
| H O | 1.259093  | 1.980492  | -0.964980 |
| H O | 0.624519  | 1.795624  | 0.738275  |
| C O | -0.622754 | -0.831895 | 0.908187  |
| C O | 0.410271  | -0.533085 | -0.016236 |
| C O | -1.405102 | -1.541343 | -0.149039 |
| C O | -0.345348 | -1.147013 | -1.212172 |
| O O | -2.402955 | -2.217042 | -0.171948 |
| C O | 1.812644  | -0.522835 | 0.207832  |
| N O | 2.964854  | -0.519878 | 0.385445  |
| H O | -0.566066 | -1.005862 | 1.978353  |
| H O | -0.678115 | -0.437154 | -1.978353 |
| H O | 0.132513  | -2.009617 | -1.689024 |

#### TS-45+BU

B3LYP/6-31G(d) Geometry

|      |           |           |           |
|------|-----------|-----------|-----------|
| C O  | 1.811015  | -0.371329 | -0.284754 |
| C O  | 1.363039  | -0.017366 | 1.013800  |
| C O  | 0.230777  | -0.528341 | 1.582625  |
| C O  | 1.077698  | -1.188074 | -1.143903 |
| H O  | 2.651323  | 0.185749  | -0.694330 |
| H O  | 1.876696  | 0.800559  | 1.515828  |
| H O  | -0.165031 | -0.118568 | 2.506816  |
| H O  | -0.231593 | -1.442690 | 1.235385  |
| H O  | 1.494266  | -1.385722 | -2.129063 |
| H O  | 0.505439  | -2.020600 | -0.742401 |
| C O  | -1.540617 | -0.206743 | -0.495130 |
| C O  | -0.601156 | -0.129081 | -1.539782 |
| C O  | -1.523720 | 1.238032  | -0.203905 |
| C O  | -0.439480 | 1.385219  | -1.315950 |
| O O  | -2.154911 | 2.013166  | 0.473302  |
| Cl O | -2.651323 | -1.480595 | -0.082092 |
| H O  | -0.698265 | -0.611993 | -2.506816 |
| H O  | 0.551221  | 1.703801  | -0.970344 |
| H O  | -0.769787 | 2.020600  | -2.144198 |

#### TS-46+BU

B3LYP/6-31G(d) Geometry

|     |           |           |           |
|-----|-----------|-----------|-----------|
| C O | -2.085623 | 1.467214  | 0.060197  |
| C O | -0.910614 | 2.103194  | -0.384163 |
| C O | 0.339823  | 1.763407  | 0.112799  |
| C O | -2.070949 | 0.522898  | 1.069738  |
| H O | -2.988925 | 1.584861  | -0.534822 |
| H O | -0.967551 | 2.711130  | -1.284746 |
| H O | 1.232493  | 2.186293  | -0.338776 |
| H O | 0.464439  | 1.463942  | 1.147947  |
| H O | -2.960111 | -0.060736 | 1.288616  |
| H O | -1.346978 | 0.586994  | 1.873416  |
| C O | 0.419324  | -0.398922 | -0.390753 |
| C O | -0.538450 | -1.110772 | 0.393209  |
| C O | 1.833047  | -0.451239 | -0.223793 |
| C O | -0.352357 | -0.625385 | -1.706695 |
| C O | -1.315329 | -1.464558 | -0.830110 |
| C O | -0.391185 | -1.837559 | 1.694920  |
| O O | -2.240542 | -2.204565 | -1.066888 |
| N O | 2.988925  | -0.502218 | -0.082960 |
| H O | 0.166303  | -1.215386 | -2.469432 |
| H O | -0.776258 | 0.278542  | -2.160604 |

|     |           |           |          |
|-----|-----------|-----------|----------|
| H O | -1.360072 | -2.195676 | 2.055055 |
| H O | 0.062357  | -1.208961 | 2.469432 |
| H O | 0.260896  | -2.711130 | 1.565563 |

#### TS-47+BU

B3LYP/6-31G(d) Geometry

|     |           |           |           |
|-----|-----------|-----------|-----------|
| C O | -2.059938 | -0.376825 | -0.476448 |
| C O | -1.597581 | -1.670395 | -0.152471 |
| C O | -0.700430 | -1.897835 | 0.861795  |
| C O | -1.543423 | 0.765367  | 0.130225  |
| H O | -2.659938 | -0.262299 | -1.377082 |
| H O | -1.828210 | -2.481784 | -0.840318 |
| H O | -0.225671 | -2.867005 | 0.980702  |
| H O | -0.622561 | -1.228242 | 1.708553  |
| H O | -1.910739 | 1.731814  | -0.205916 |
| H O | -1.280411 | 0.746288  | 1.184441  |
| C O | 1.160000  | -0.228361 | 0.342280  |
| C O | 0.483592  | 0.787166  | -0.392360 |
| C O | 1.484599  | -0.982189 | -0.883931 |
| C O | 0.682056  | 0.039341  | -1.728251 |
| O O | 2.211441  | -1.916031 | -1.156928 |
| C O | 1.799214  | -0.221685 | 1.694720  |
| C O | 0.694522  | 2.275550  | -0.213164 |
| H O | -0.233996 | -0.339814 | -2.199330 |
| H O | 1.289879  | 0.555986  | -2.481339 |
| H O | 1.109946  | 0.112444  | 2.481339  |
| H O | 2.659938  | 0.462303  | 1.716519  |
| H O | 2.165045  | -1.219169 | 1.957187  |
| H O | 1.732119  | 2.532631  | -0.467998 |
| H O | 0.522964  | 2.590616  | 0.822372  |
| H O | 0.041096  | 2.867005  | -0.861919 |

#### TS-48+BU

B3LYP/6-31G(d) Geometry

|     |           |           |           |
|-----|-----------|-----------|-----------|
| C O | 2.045460  | -0.042688 | -0.829004 |
| C O | 1.423292  | 1.218804  | -0.897397 |
| C O | 0.860219  | 1.819462  | 0.207065  |
| C O | 2.073574  | -0.785745 | 0.348965  |
| H O | 2.300394  | -0.536496 | -1.764854 |
| H O | 1.212652  | 1.632548  | -1.881949 |
| H O | 0.231490  | 2.698670  | 0.105122  |
| H O | 1.241221  | 1.631970  | 1.203432  |
| H O | 2.503272  | -1.784927 | 0.327143  |
| H O | 2.197045  | -0.277099 | 1.300315  |
| C O | -0.618956 | 0.061082  | 1.003675  |
| C O | 0.052401  | -1.155237 | 0.815408  |
| C O | -1.623102 | 0.271135  | -0.057784 |
| O O | -2.503272 | 1.115050  | -0.091677 |
| C O | -1.383215 | -0.820817 | -1.112848 |
| C O | -0.549388 | -1.892794 | -0.386322 |
| H O | -0.686055 | 0.593050  | 1.945765  |
| H O | 0.385813  | -1.737785 | 1.670320  |
| H O | -0.822585 | -0.376512 | -1.945765 |
| H O | -2.333392 | -1.183055 | -1.514915 |
| H O | 0.205182  | -2.358747 | -1.027346 |
| H O | -1.198139 | -2.698670 | -0.017427 |

#### TS-49+BU

B3LYP/6-31G(d) Geometry

|     |           |           |           |
|-----|-----------|-----------|-----------|
| C O | -2.096093 | -0.149783 | -0.351037 |
| C O | -1.388416 | -0.911711 | -1.301927 |
| C O | -0.462730 | -1.862676 | -0.945737 |
| C O | -1.826747 | -0.243327 | 1.018598  |



|     |           |           |           |
|-----|-----------|-----------|-----------|
| H O | -2.691606 | 0.687375  | -0.709447 |
| H O | -1.461674 | -0.617393 | -2.347633 |
| H O | 0.193328  | -2.311775 | -1.684955 |
| H O | -0.510816 | -2.369540 | 0.008355  |
| H O | -2.383510 | 0.408225  | 1.689461  |
| H O | -1.612784 | -1.217833 | 1.451518  |
| C O | 0.984588  | -0.562736 | 0.752365  |
| C O | 0.081008  | 0.385119  | 1.271035  |
| C O | 1.716099  | 0.007085  | -0.396859 |
| O O | 2.691606  | -0.479258 | -0.951170 |
| C O | 1.494393  | -1.776330 | 1.472843  |
| C O | 1.084875  | 1.368858  | -0.717623 |
| C O | 0.257933  | 1.719244  | 0.534973  |
| H O | -0.081015 | 0.417838  | 2.347633  |
| H O | 2.068261  | -2.409079 | 0.789509  |
| H O | 0.686222  | -2.370944 | 1.918031  |
| H O | 2.165417  | -1.488444 | 2.294210  |
| H O | 0.450545  | 1.268013  | -1.606642 |
| H O | 1.862929  | 2.099940  | -0.955731 |
| H O | -0.694699 | 2.202612  | 0.296517  |
| H O | 0.815809  | 2.409079  | 1.181569  |

#### TS-50+BU

B3LYP/6-31G(d) Geometry

|     |           |           |           |
|-----|-----------|-----------|-----------|
| C O | -1.400583 | 1.539908  | 0.915751  |
| C O | -0.359987 | 2.256445  | 0.299066  |
| C O | 0.034450  | 1.986260  | -0.996721 |
| C O | -2.057630 | 0.502344  | 0.261055  |
| H O | -1.535492 | 1.654044  | 1.989884  |
| H O | 0.279924  | 2.877029  | 0.923445  |
| H O | 0.951664  | 2.407220  | -1.397413 |
| H O | -0.679375 | 1.641499  | -1.735643 |
| H O | -2.801286 | -0.074469 | 0.805846  |
| H O | -2.257370 | 0.585044  | -0.802414 |
| C O | 0.467581  | -0.329166 | -0.907811 |
| C O | -0.566961 | -0.983334 | -0.208088 |
| C O | 1.676235  | -0.206821 | -0.068873 |
| O O | 2.801286  | 0.099863  | -0.426817 |
| C O | -1.510242 | -1.934375 | -0.920323 |
| C O | 1.257932  | -0.585113 | 1.358975  |
| C O | -0.035533 | -1.396801 | 1.175383  |
| H O | 0.549384  | -0.319087 | -1.989884 |
| H O | -0.989468 | -2.877029 | -1.137594 |
| H O | -1.859463 | -1.525743 | -1.874692 |
| H O | -2.388374 | -2.181350 | -0.313727 |
| H O | 1.067325  | 0.342138  | 1.915385  |
| H O | 2.061877  | -1.118641 | 1.873376  |
| H O | -0.763061 | -1.246851 | 1.979159  |
| H O | 0.191415  | -2.472763 | 1.150106  |

#### TS-51+BU

B3LYP/6-31G(d) Geometry

|     |           |           |           |
|-----|-----------|-----------|-----------|
| C O | 0.200516  | 2.012753  | 0.714095  |
| C O | 1.321295  | 1.962924  | -0.131320 |
| C O | 1.253410  | 1.377647  | -1.390958 |
| C O | -1.026693 | 1.498127  | 0.329792  |
| H O | 0.356044  | 2.280333  | 1.757662  |
| H O | 2.299119  | 2.179841  | 0.293724  |
| H O | 2.161716  | 1.224113  | -1.966571 |
| H O | 0.349373  | 1.476007  | -1.983219 |
| H O | -1.841313 | 1.426535  | 1.044982  |
| H O | -1.339072 | 1.523143  | -0.707216 |
| C O | 0.613294  | -0.666890 | -1.017270 |

|     |           |           |           |
|-----|-----------|-----------|-----------|
| C O | -0.480412 | -0.712752 | -0.123220 |
| C O | 1.835384  | -1.159763 | -0.318301 |
| O O | 2.892270  | -1.459587 | -0.836604 |
| C O | -1.806151 | -0.978799 | -0.586255 |
| C O | 1.503992  | -1.230591 | 1.176814  |
| C O | -0.033054 | -1.252965 | 1.248620  |
| N O | -2.892270 | -1.189770 | -0.952055 |
| H O | 0.503383  | -0.830360 | -2.083581 |
| H O | 1.913520  | -0.332439 | 1.657005  |
| H O | 1.986927  | -2.096614 | 1.636699  |
| H O | -0.436103 | -0.675237 | 2.083581  |
| H O | -0.401986 | -2.280333 | 1.359326  |

#### TS-52+BU

B3LYP/6-31G(d) Geometry

|      |           |           |           |
|------|-----------|-----------|-----------|
| C O  | 1.806599  | -0.991239 | -0.006413 |
| C O  | 1.199279  | -0.886133 | 1.262455  |
| C O  | -0.007493 | -1.467802 | 1.557697  |
| C O  | 1.172481  | -1.610953 | -1.091832 |
| H O  | 2.687919  | -0.382459 | -0.198098 |
| H O  | 1.637627  | -0.193190 | 1.978855  |
| H O  | -0.536612 | -1.229170 | 2.475316  |
| H O  | -0.389283 | -2.314332 | 1.004103  |
| H O  | 1.710363  | -1.627047 | -2.038010 |
| H O  | 0.592031  | -2.514656 | -0.918258 |
| C O  | -1.434118 | -0.716963 | -0.551306 |
| C O  | -0.430069 | -0.524921 | -1.516579 |
| C O  | -1.755145 | 0.506448  | 0.202931  |
| O O  | -2.687919 | 0.696442  | 0.961766  |
| Cl O | -2.512098 | -2.088593 | -0.575970 |
| C O  | -0.704901 | 1.541801  | -0.231100 |
| C O  | -0.077718 | 0.969633  | -1.521160 |
| H O  | -0.536003 | -1.027374 | -2.475316 |
| H O  | 0.037462  | 1.655612  | 0.566856  |
| H O  | -1.184407 | 2.514656  | -0.371737 |
| H O  | 0.999979  | 1.146956  | -1.584630 |
| H O  | -0.535892 | 1.431168  | -2.404459 |

#### TS-53+BU

B3LYP/6-31G(d) Geometry

|     |           |           |           |
|-----|-----------|-----------|-----------|
| C O | 0.188534  | 2.169179  | 0.104499  |
| C O | 1.421004  | 1.867283  | -0.493275 |
| C O | 1.533420  | 0.881902  | -1.462435 |
| C O | -0.967629 | 1.466090  | -0.224609 |
| H O | 0.184559  | 2.805653  | 0.987037  |
| H O | 2.326461  | 2.270696  | -0.044105 |
| H O | 2.511582  | 0.550860  | -1.798389 |
| H O | 0.725191  | 0.712710  | -2.163577 |
| H O | -1.881122 | 1.641820  | 0.337074  |
| H O | -1.135320 | 1.137371  | -1.244880 |
| C O | 0.632855  | -1.013400 | -0.525290 |
| C O | -0.454915 | -0.599330 | 0.293918  |
| C O | 1.828867  | -1.221524 | 0.340798  |
| O O | 2.856672  | -1.783345 | 0.008634  |
| C O | 0.487078  | -1.801752 | -1.800026 |
| C O | -1.779141 | -1.066607 | -0.000031 |
| C O | 1.515338  | -0.657004 | 1.728544  |
| C O | -0.018350 | -0.539173 | 1.773337  |
| N O | -2.856672 | -1.442228 | -0.233314 |
| H O | 1.460563  | -1.919188 | -2.283078 |
| H O | 0.101696  | -2.805653 | -1.580827 |
| H O | -0.213125 | -1.336515 | -2.501784 |
| H O | 2.001749  | 0.320522  | 1.830566  |



|     |           |           |          |
|-----|-----------|-----------|----------|
| H O | 1.930841  | -1.308773 | 2.501784 |
| H O | -0.456809 | -1.392244 | 2.304755 |
| H O | -0.366629 | 0.367158  | 2.274765 |

#### TS-54+BU

B3LYP/6-31G(d) Geometry

|     |           |           |           |
|-----|-----------|-----------|-----------|
| C O | 1.912794  | -1.325259 | 0.267886  |
| C O | 0.917855  | -2.226435 | -0.151663 |
| C O | 0.047153  | -1.924528 | -1.174719 |
| C O | 2.018194  | -0.044441 | -0.284522 |
| H O | 2.452721  | -1.547172 | 1.186293  |
| H O | 0.718718  | -3.098683 | 0.468623  |
| H O | -0.827901 | -2.538352 | -1.364772 |
| H O | 0.331214  | -1.253703 | -1.974089 |
| H O | 2.785318  | 0.615626  | 0.114503  |
| H O | 1.860681  | 0.080397  | -1.352997 |
| C O | -0.787806 | 0.353993  | -0.505252 |
| C O | 0.299169  | 0.991019  | 0.150139  |
| C O | -1.664024 | -0.311395 | 0.480156  |
| O O | -2.785318 | -0.754437 | 0.274586  |
| C O | -1.315413 | 0.717424  | -1.863255 |
| C O | -0.949367 | -0.269690 | 1.835329  |
| C O | 0.106452  | 0.836268  | 1.670507  |
| C O | 0.783613  | 2.348820  | -0.337372 |
| H O | -2.120145 | 0.032275  | -2.144533 |
| H O | -0.542114 | 0.698595  | -2.641711 |
| H O | -1.733698 | 1.734509  | -1.860514 |
| H O | -0.483226 | -1.245181 | 2.020417  |
| H O | -1.666000 | -0.090133 | 2.641711  |
| H O | 1.042817  | 0.626145  | 2.197358  |
| H O | -0.276348 | 1.787069  | 2.067995  |
| H O | -0.004982 | 3.098683  | -0.186093 |
| H O | 1.033127  | 2.345513  | -1.403231 |
| H O | 1.665892  | 2.685369  | 0.217172  |

#### TS-55+BU

B3LYP/6-31G(d) Geometry

|     |           |           |           |
|-----|-----------|-----------|-----------|
| C O | 1.490614  | 0.702429  | -0.952430 |
| C O | 1.489507  | -0.703830 | -0.951798 |
| C O | 1.371848  | -1.439634 | 0.216080  |
| C O | 1.374540  | 1.439513  | 0.214700  |
| H O | 1.358794  | 1.211701  | -1.904402 |
| H O | 1.356914  | -1.213764 | -1.903305 |
| H O | 1.223391  | -2.514425 | 0.169598  |
| H O | 1.782907  | -1.069368 | 1.149061  |
| H O | 1.227265  | 2.514425  | 0.167376  |
| H O | 1.784650  | 1.069311  | 1.148122  |
| C O | -0.601931 | -0.696040 | 1.041759  |
| C O | -0.601541 | 0.697372  | 1.042077  |
| C O | -1.427669 | 1.142529  | -0.105845 |
| C O | -1.428793 | -1.139992 | -0.106304 |
| O O | -1.781272 | 0.001485  | -0.834209 |
| O O | -1.782547 | 2.240543  | -0.437497 |
| O O | -1.784650 | -2.237627 | -0.438169 |
| H O | -0.482783 | -1.338467 | 1.904132  |
| H O | -0.480999 | 1.339586  | 1.904402  |

#### TS-56+BU

B3LYP/6-31G(d) Geometry

|     |          |           |           |
|-----|----------|-----------|-----------|
| C O | 1.283734 | 1.257979  | -0.891199 |
| C O | 1.925787 | 0.005577  | -0.931552 |
| C O | 2.027740 | -0.805308 | 0.192133  |
| C O | 0.777512 | 1.784028  | 0.278125  |

|     |           |           |           |
|-----|-----------|-----------|-----------|
| H O | 1.001957  | 1.717785  | -1.836043 |
| H O | 2.135528  | -0.425876 | -1.908376 |
| H O | 2.455306  | -1.800621 | 0.091078  |
| H O | 2.167881  | -0.362333 | 1.172985  |
| H O | 0.133514  | 2.657765  | 0.260587  |
| H O | 1.228710  | 1.554236  | 1.236462  |
| C O | -0.022407 | -1.183824 | 0.733811  |
| C O | -0.672464 | 0.028051  | 0.957379  |
| C O | -1.652568 | 0.257056  | -0.124881 |
| O O | -2.455306 | 1.145195  | -0.278579 |
| C O | -0.674635 | -1.797802 | -0.494148 |
| O O | -1.516624 | -0.771445 | -1.035624 |
| H O | 0.313588  | -1.826651 | 1.540328  |
| H O | -0.780053 | 0.531223  | 1.908376  |
| H O | -1.300265 | -2.657765 | -0.216975 |
| H O | 0.020264  | -2.111253 | -1.276654 |

#### TS-57+BU

B3LYP/6-31G(d) Geometry

|     |           |           |           |
|-----|-----------|-----------|-----------|
| C O | 1.607397  | -1.105531 | 1.081851  |
| C O | 2.282384  | 0.066071  | 0.694084  |
| C O | 2.298588  | 0.497436  | -0.632825 |
| C O | 0.990068  | -1.932122 | 0.168729  |
| H O | 1.402120  | -1.250468 | 2.141297  |
| H O | 2.588573  | 0.761675  | 1.473168  |
| H O | 2.783353  | 1.442922  | -0.866861 |
| H O | 2.378069  | -0.238593 | -1.427429 |
| H O | 0.315897  | -2.720554 | 0.487948  |
| H O | 1.359849  | -2.022681 | -0.844724 |
| C O | 0.307782  | 0.868150  | -1.151118 |
| C O | -0.400842 | -0.345900 | -1.078412 |
| C O | -1.569328 | -0.545492 | -0.202929 |
| O O | -2.298859 | -1.526027 | -0.307912 |
| C O | -0.143218 | 2.038067  | -0.286133 |
| C O | -1.918105 | 0.577336  | 0.776382  |
| C O | -0.779330 | 1.572607  | 1.029653  |
| H O | 0.664486  | 1.149529  | -2.141297 |
| H O | -0.353517 | -1.042458 | -1.911051 |
| H O | -0.882012 | 2.618893  | -0.861105 |
| H O | 0.691538  | 2.720554  | -0.088207 |
| H O | -2.279610 | 0.121087  | 1.704478  |
| H O | -2.783353 | 1.098174  | 0.339036  |
| H O | -1.153139 | 2.437058  | 1.591970  |
| H O | -0.010170 | 1.103607  | 1.653227  |

#### TS-58+BU

B3LYP/6-31G(d) Geometry

|     |           |           |           |
|-----|-----------|-----------|-----------|
| C O | -1.420424 | -0.875314 | -1.457270 |
| C O | -2.172607 | -0.279732 | -0.427259 |
| C O | -1.953477 | -0.588660 | 0.922227  |
| C O | -0.489807 | -1.859475 | -1.223222 |
| H O | -1.459094 | -0.417333 | -2.444703 |
| H O | -2.765439 | 0.599774  | -0.670620 |
| H O | -2.554906 | -0.061976 | 1.661094  |
| H O | -1.763094 | -1.624516 | 1.194907  |
| H O | 0.201875  | -2.174539 | -1.998420 |
| H O | -0.562108 | -2.517699 | -0.368879 |
| C O | -0.093574 | -0.004616 | 1.401264  |
| C O | 0.838140  | -0.880017 | 0.793385  |
| C O | 1.839620  | -0.394802 | -0.178024 |
| O O | 2.765439  | -1.106291 | -0.563834 |
| C O | -0.003981 | 1.492627  | 1.130549  |
| C O | 1.798936  | 1.077735  | -0.593001 |

|     |           |           |           |
|-----|-----------|-----------|-----------|
| C O | 0.485436  | 1.804022  | -0.287927 |
| C O | 1.120841  | -2.219740 | 1.429337  |
| H O | -0.310252 | -0.243051 | 2.444703  |
| H O | 0.699258  | 1.924217  | 1.860091  |
| H O | -0.970947 | 1.975294  | 1.317117  |
| H O | 2.062472  | 1.136829  | -1.654759 |
| H O | 2.629257  | 1.556715  | -0.052328 |
| H O | 0.616509  | 2.886527  | -0.409415 |
| H O | -0.281286 | 1.500340  | -1.006841 |
| H O | 0.203732  | -2.699664 | 1.795327  |
| H O | 1.785748  | -2.101783 | 2.296675  |
| H O | 1.626082  | -2.886527 | 0.727653  |

#### TS-59+BU

##### B3LYP/6-31G(d) Geometry

|     |           |           |           |
|-----|-----------|-----------|-----------|
| C O | -0.728374 | 2.083748  | 0.484583  |
| C O | -1.684274 | 1.133484  | 0.878350  |
| C O | -2.130393 | 0.144254  | 0.004569  |
| C O | -0.229281 | 2.113630  | -0.803539 |
| H O | -0.220060 | 2.655952  | 1.258807  |
| H O | -1.899978 | 1.032169  | 1.940512  |
| H O | -2.811139 | -0.616279 | 0.380054  |
| H O | -2.283645 | 0.390400  | -1.041073 |
| H O | 0.640918  | 2.711994  | -1.054480 |
| H O | -0.852328 | 1.834184  | -1.644664 |
| C O | -0.416179 | -1.018524 | -0.591936 |
| C O | 0.514563  | -0.101717 | -1.135862 |
| C O | 1.851629  | 0.139890  | -0.557925 |
| O O | 2.727838  | 0.727710  | -1.182743 |
| C O | -0.028892 | -1.734644 | 0.701636  |
| C O | 2.153535  | -0.463523 | 0.814139  |
| C O | 0.909958  | -0.910828 | 1.589421  |
| C O | -1.179050 | -1.891095 | -1.581066 |
| H O | 0.474826  | 0.100564  | -2.204016 |
| H O | 0.474288  | -2.675841 | 0.422428  |
| H O | -0.925559 | -2.030415 | 1.259102  |
| H O | 2.756546  | 0.256051  | 1.378932  |
| H O | 2.811139  | -1.325414 | 0.624736  |
| H O | 1.204207  | -1.498745 | 2.467448  |
| H O | 0.373557  | -0.033917 | 1.966283  |
| H O | -1.487795 | -1.326761 | -2.467448 |
| H O | -2.071271 | -2.344346 | -1.134754 |
| H O | -0.534488 | -2.711994 | -1.924425 |

#### TS-60+BU

##### B3LYP/6-31G(d) Geometry

|     |           |           |           |
|-----|-----------|-----------|-----------|
| C O | 0.214453  | 2.175264  | -0.156044 |
| C O | -0.868776 | 1.843340  | 0.670453  |
| C O | -1.906330 | 1.040299  | 0.220905  |
| C O | 0.292549  | 1.706304  | -1.464527 |
| H O | 1.102149  | 2.607373  | 0.301841  |
| H O | -0.786774 | 2.050306  | 1.735971  |
| H O | -2.664102 | 0.684528  | 0.913537  |
| H O | -2.228750 | 1.081141  | -0.812281 |
| H O | 1.199825  | 1.849390  | -2.043437 |
| H O | -0.613091 | 1.628105  | -2.057341 |
| C O | -0.793355 | -0.890662 | -0.432828 |
| C O | 0.238403  | -0.452093 | -1.306601 |
| C O | 1.678387  | -0.678979 | -0.978015 |
| O O | 2.546332  | -0.509892 | -1.820108 |
| C O | -0.435630 | -1.516145 | 0.919128  |
| C O | 2.020962  | -1.205243 | 0.411831  |
| C O | 0.908934  | -1.006395 | 1.447447  |

|     |           |           |           |
|-----|-----------|-----------|-----------|
| C O | -1.989040 | -1.397082 | -1.046428 |
| N O | -2.967366 | -1.804469 | -1.530925 |
| H O | 0.045813  | -0.497805 | -2.374593 |
| H O | -0.382266 | -2.607373 | 0.783539  |
| H O | -1.233121 | -1.338715 | 1.646869  |
| H O | 2.967366  | -0.751441 | 0.724408  |
| H O | 2.225969  | -2.279083 | 0.283946  |
| H O | 1.161661  | -1.533528 | 2.374593  |
| H O | 0.823178  | 0.054659  | 1.703952  |

#### TS-61+BU

##### B3LYP/6-31G(d) Geometry

|      |           |           |           |
|------|-----------|-----------|-----------|
| C O  | 1.185641  | -1.215138 | 1.379788  |
| C O  | 1.829755  | -1.388189 | 0.138146  |
| C O  | 1.157589  | -1.857223 | -1.003682 |
| C O  | -0.121117 | -1.570075 | 1.600772  |
| H O  | 1.706877  | -0.638083 | 2.142402  |
| H O  | 2.814841  | -0.942830 | 0.012786  |
| H O  | 1.751712  | -1.957672 | -1.910790 |
| H O  | 0.434806  | -2.662661 | -0.885359 |
| H O  | -0.638777 | -1.263908 | 2.504932  |
| H O  | -0.630562 | -2.309074 | 0.999120  |
| C O  | -0.177826 | -0.540940 | -1.529636 |
| C O  | -1.278929 | -0.607177 | -0.645539 |
| C O  | -1.767158 | 0.498114  | 0.193917  |
| O O  | -2.814841 | 0.455390  | 0.824370  |
| C O  | 0.493650  | 0.819991  | -1.704361 |
| C O  | -0.954909 | 1.797946  | 0.130459  |
| C O  | 0.466345  | 1.667162  | -0.427472 |
| Cl O | -2.387061 | -1.963605 | -0.864639 |
| H O  | -0.340012 | -1.066620 | -2.470344 |
| H O  | -0.042783 | 1.350924  | -2.504932 |
| H O  | 1.523447  | 0.688640  | -2.056821 |
| H O  | -0.959835 | 2.239814  | 1.132371  |
| H O  | -1.547737 | 2.475619  | -0.501549 |
| H O  | 0.876720  | 2.662661  | -0.636710 |
| H O  | 1.119810  | 1.213540  | 0.323712  |

#### TS-62+BU

##### B3LYP/6-31G(d) Geometry

|     |           |           |           |
|-----|-----------|-----------|-----------|
| C O | 0.525452  | 2.003766  | -1.301243 |
| C O | -0.686845 | 2.150124  | -0.616293 |
| C O | -1.687764 | 1.181045  | -0.704641 |
| C O | 0.757866  | 0.915764  | -2.129728 |
| H O | 1.361548  | 2.640220  | -1.016889 |
| H O | -0.755641 | 2.907958  | 0.161497  |
| H O | -2.573711 | 1.271290  | -0.081530 |
| H O | -1.871374 | 0.682840  | -1.651083 |
| H O | 1.751334  | 0.720417  | -2.521516 |
| H O | -0.051934 | 0.496837  | -2.713450 |
| C O | -0.765967 | -0.631164 | 0.035838  |
| C O | 0.289097  | -0.974606 | -0.871986 |
| C O | 1.699639  | -1.047560 | -0.378969 |
| O O | 2.578162  | -1.559303 | -1.060989 |
| C O | -0.442330 | -0.311361 | 1.503977  |
| C O | 2.020257  | -0.573816 | 1.036133  |
| C O | 0.947606  | 0.303994  | 1.683521  |
| C O | -0.012313 | -1.874779 | -2.053918 |
| C O | -1.997316 | -1.372468 | -0.107430 |
| N O | -2.999502 | -1.959119 | -0.191199 |
| H O | -0.495910 | -1.252944 | 2.070409  |
| H O | -1.214594 | 0.341499  | 1.923385  |
| H O | 2.999502  | -0.083729 | 1.013315  |

|     |           |           |           |
|-----|-----------|-----------|-----------|
| H O | 2.158793  | -1.492725 | 1.625467  |
| H O | 1.155681  | 0.423620  | 2.753374  |
| H O | 0.968159  | 1.306770  | 1.248725  |
| H O | -0.928073 | -1.576530 | -2.574881 |
| H O | -0.160078 | -2.907958 | -1.714511 |
| H O | 0.824943  | -1.876628 | -2.753374 |

#### TS-63+BU

B3LYP/6-31G(d) Geometry

|     |           |           |           |
|-----|-----------|-----------|-----------|
| C O | 0.798087  | -2.230981 | -0.819494 |
| C O | 1.860337  | -1.462783 | -0.315185 |
| C O | 2.052439  | -0.129435 | -0.705930 |
| C O | -0.057203 | -1.754268 | -1.787966 |
| H O | 0.539460  | -3.152107 | -0.299010 |
| H O | 2.393596  | -1.834375 | 0.557609  |
| H O | 2.885500  | 0.405096  | -0.253872 |
| H O | 1.908545  | 0.124959  | -1.753867 |
| H O | -0.980029 | -2.273556 | -2.027504 |
| H O | 0.266748  | -1.025055 | -2.517062 |
| C O | 0.476243  | 0.991933  | -0.119225 |
| C O | -0.636633 | 0.590694  | -0.922269 |
| C O | -1.848631 | -0.023494 | -0.332985 |
| O O | -2.885500 | -0.159281 | -0.981125 |
| C O | 0.368895  | 0.788977  | 1.396514  |
| C O | -1.856563 | -0.366580 | 1.156804  |
| C O | -0.476472 | -0.415882 | 1.813345  |
| C O | 1.112691  | 2.346943  | -0.449969 |
| C O | -0.829525 | 1.185073  | -2.297529 |
| H O | -0.081670 | 1.702852  | 1.817326  |
| H O | 1.373341  | 0.723153  | 1.833166  |
| H O | -2.407570 | -1.304998 | 1.282494  |
| H O | -2.474772 | 0.409224  | 1.633191  |
| H O | -0.577685 | -0.436910 | 2.905720  |
| H O | 0.037488  | -1.338321 | 1.531269  |
| H O | 0.394141  | 3.152107  | -0.246411 |
| H O | 1.418011  | 2.435027  | -1.495616 |
| H O | 1.993009  | 2.527571  | 0.176028  |
| H O | 0.083442  | 1.144830  | -2.905720 |
| H O | -1.115338 | 2.244771  | -2.231397 |
| H O | -1.634377 | 0.663796  | -2.818372 |

#### TS-64+BU

B3LYP/6-31G(d) Geometry

|     |           |           |           |
|-----|-----------|-----------|-----------|
| C O | -0.608564 | -1.429594 | -0.084920 |
| C O | 0.273409  | -0.823021 | 0.997616  |
| O O | -0.537215 | -0.614813 | -1.263338 |
| C O | -2.114158 | -1.311451 | 0.253616  |
| C O | -1.308246 | 0.508255  | -0.887513 |
| C O | 0.268667  | 0.580811  | 1.074133  |
| O O | -2.468741 | -0.013253 | -0.232648 |
| C O | -0.542554 | 1.369474  | 0.134253  |
| O O | -0.709065 | 2.579751  | 0.190947  |
| H O | -0.311332 | -2.444500 | -0.355978 |
| H O | 0.320374  | -1.382518 | 1.931143  |
| H O | -2.324454 | -1.380266 | 1.326059  |
| H O | -2.697840 | -2.071147 | -0.280924 |
| H O | -1.602004 | 1.077857  | -1.771224 |
| H O | 0.571959  | 1.089799  | 1.984020  |
| C O | 2.197588  | -1.499449 | 0.504577  |
| C O | 2.452151  | -0.955704 | -0.751402 |
| C O | 2.516498  | 0.436047  | -0.959985 |
| C O | 2.408310  | 1.339587  | 0.069450  |
| H O | 2.106247  | -2.579751 | 0.599454  |

|     |          |           |           |
|-----|----------|-----------|-----------|
| H O | 2.602351 | -1.017844 | 1.389740  |
| H O | 2.361665 | -1.595374 | -1.626209 |
| H O | 2.450321 | 0.797611  | -1.984020 |
| H O | 2.272585 | 2.399085  | -0.122903 |
| H O | 2.697840 | 1.082256  | 1.080929  |

#### TS-65+BU

B3LYP/6-31G(d) Geometry

|     |           |           |           |
|-----|-----------|-----------|-----------|
| C O | -0.617303 | -1.620367 | 0.314581  |
| C O | 0.309206  | -0.697498 | 1.094962  |
| O O | -0.555816 | -1.287100 | -1.077888 |
| C O | -2.109574 | -1.338591 | 0.610687  |
| C O | -1.279554 | -0.076034 | -1.114009 |
| C O | 0.318950  | 0.660892  | 0.704126  |
| O O | -2.444408 | -0.294505 | -0.308828 |
| C O | -0.482175 | 1.068383  | -0.462784 |
| O O | -0.648993 | 2.227346  | -0.826258 |
| C O | 0.776967  | 1.741999  | 1.649026  |
| H O | -0.350623 | -2.673953 | 0.423163  |
| H O | 0.333259  | -0.886924 | 2.169998  |
| H O | -2.292906 | -1.007952 | 1.638678  |
| H O | -2.726683 | -2.220381 | 0.398273  |
| H O | -1.574232 | 0.158932  | -2.138232 |
| H O | 1.687644  | 1.455777  | 2.190844  |
| H O | 0.006355  | 1.949419  | 2.404897  |
| H O | 0.957721  | 2.673953  | 1.108398  |
| C O | 2.147157  | -1.508041 | 0.879166  |
| C O | 2.372516  | -1.616764 | -0.496396 |
| C O | 2.462920  | -0.484975 | -1.331903 |
| C O | 2.437777  | 0.797451  | -0.849243 |
| H O | 2.065705  | -2.428742 | 1.454625  |
| H O | 2.625720  | -0.702994 | 1.432252  |
| H O | 2.238963  | -2.585950 | -0.971170 |
| H O | 2.376093  | -0.643101 | -2.404897 |
| H O | 2.331749  | 1.647601  | -1.515826 |
| H O | 2.726683  | 1.031392  | 0.166574  |

#### TS-66+BU

B3LYP/6-31G(d) Geometry

|     |           |           |           |
|-----|-----------|-----------|-----------|
| C O | -0.634595 | -0.849658 | -0.666615 |
| C O | 0.271951  | -0.688036 | 0.556400  |
| O O | -0.541851 | 0.316416  | -1.495252 |
| C O | -2.142822 | -0.818545 | -0.314109 |
| C O | -1.288434 | 1.260444  | -0.757071 |
| C O | 0.311753  | 0.623193  | 1.084310  |
| O O | -2.464372 | 0.575730  | -0.317012 |
| C O | -0.506530 | 1.696123  | 0.494265  |
| O O | -0.656631 | 2.809575  | 0.976783  |
| C O | 0.297869  | -1.860316 | 1.526473  |
| H O | -0.365282 | -1.719122 | -1.270377 |
| H O | -2.379651 | -1.251697 | 0.662516  |
| H O | -2.731351 | -1.329356 | -1.086290 |
| H O | -1.562453 | 2.105781  | -1.391046 |
| H O | 0.592139  | 0.776420  | 2.123400  |
| H O | 0.520492  | -2.809575 | 1.026124  |
| H O | -0.670398 | -1.972760 | 2.031022  |
| H O | 1.048585  | -1.705530 | 2.308399  |
| C O | 2.185253  | -1.083239 | -0.333458 |
| C O | 2.408902  | -0.058163 | -1.247467 |
| C O | 2.481577  | 1.285239  | -0.841678 |
| C O | 2.382315  | 1.647773  | 0.484808  |
| H O | 2.074187  | -2.100215 | -0.703545 |
| H O | 2.630269  | -1.024579 | 0.654796  |

|     |          |           |           |
|-----|----------|-----------|-----------|
| H O | 2.288973 | -0.263537 | -2.308399 |
| H O | 2.389772 | 2.055294  | -1.604779 |
| H O | 2.241914 | 2.684591  | 0.773892  |
| H O | 2.731351 | 0.990081  | 1.272128  |

#### TS-67+BU

B3LYP/6-31G(d) Geometry

|     |           |           |           |
|-----|-----------|-----------|-----------|
| C O | 0.682788  | 0.732138  | -0.792565 |
| C O | -0.241257 | 0.627712  | 0.427289  |
| O O | 0.894478  | -0.580641 | -1.320623 |
| C O | 2.123782  | 1.121929  | -0.398104 |
| C O | 1.772819  | -1.147473 | -0.368209 |
| C O | -0.099173 | -0.531406 | 1.231831  |
| O O | 2.713922  | -0.131304 | -0.028770 |
| C O | 0.988154  | -1.498674 | 0.905033  |
| O O | 1.287149  | -2.447147 | 1.607190  |
| C O | -0.618816 | 1.862038  | 1.046109  |
| N O | -0.926654 | 2.879064  | 1.524992  |
| H O | 0.267354  | 1.362321  | -1.579196 |
| H O | 2.174738  | 1.819128  | 0.442965  |
| H O | 2.662109  | 1.541196  | -1.256553 |
| H O | 2.281936  | -2.014706 | -0.793286 |
| H O | -0.343965 | -0.469128 | 2.287732  |
| C O | -2.293198 | 0.428912  | -0.648183 |
| C O | -2.167186 | -0.828765 | -1.211570 |
| C O | -1.928293 | -1.968542 | -0.426870 |
| C O | -1.798184 | -1.887710 | 0.953117  |
| H O | -2.349080 | 1.311339  | -1.279980 |
| H O | -2.713922 | 0.558941  | 0.341789  |
| H O | -2.036972 | -0.913765 | -2.287732 |
| H O | -1.611527 | -2.879064 | -0.930718 |
| H O | -1.470585 | -2.751937 | 1.522960  |
| H O | -2.387989 | -1.169430 | 1.513045  |

#### TS-68+BU

B3LYP/6-31G(d) Geometry

|      |           |           |           |
|------|-----------|-----------|-----------|
| C O  | 0.737825  | -0.775513 | -0.797849 |
| C O  | -0.409365 | 0.143994  | -1.211389 |
| O O  | 0.752604  | -0.907577 | 0.626271  |
| C O  | 2.121103  | -0.127160 | -1.047557 |
| C O  | 1.269409  | 0.343657  | 1.026614  |
| C O  | -0.567863 | 1.277212  | -0.386093 |
| O O  | 2.373725  | 0.601476  | 0.159282  |
| C O  | 0.239869  | 1.479649  | 0.819660  |
| O O  | 0.248931  | 2.472469  | 1.529664  |
| Cl O | -1.472919 | 2.647146  | -1.012523 |
| H O  | 0.641360  | -1.772530 | -1.232778 |
| H O  | -0.476645 | 0.327122  | -2.283784 |
| H O  | 2.133532  | 0.550728  | -1.907315 |
| H O  | 2.896967  | -0.891291 | -1.175666 |
| H O  | 1.609865  | 0.299860  | 2.062248  |
| C O  | -2.045591 | -0.946184 | -1.215405 |
| C O  | -2.108861 | -1.608507 | 0.018370  |
| C O  | -2.299654 | -0.931737 | 1.243582  |
| C O  | -2.535080 | 0.412443  | 1.328201  |
| H O  | -1.912226 | -1.564206 | -2.102128 |
| H O  | -2.699561 | -0.093865 | -1.389390 |
| H O  | -1.788992 | -2.647146 | 0.064668  |
| H O  | -2.100529 | -1.488085 | 2.157138  |
| H O  | -2.508929 | 0.927353  | 2.283784  |
| H O  | -2.896967 | 0.994503  | 0.491753  |

#### TS-69+BU

B3LYP/6-31G(d) Geometry

|     |           |           |           |
|-----|-----------|-----------|-----------|
| C O | 0.681687  | 0.720818  | -1.209374 |
| C O | -0.294870 | 0.632540  | -0.024570 |
| O O | 0.919393  | -0.594971 | -1.712094 |
| C O | 2.104922  | 1.129556  | -0.770737 |
| C O | 1.763733  | -1.138381 | -0.718854 |
| C O | -0.146967 | -0.491395 | 0.849438  |
| O O | 2.703063  | -0.115879 | -0.387925 |
| C O | 0.960683  | -1.446495 | 0.553371  |
| O O | 1.293835  | -2.350824 | 1.302159  |
| C O | -0.623651 | 1.904572  | 0.560760  |
| C O | -0.560343 | -0.395169 | 2.302069  |
| N O | -0.880004 | 2.951345  | 1.002526  |
| H O | 0.287833  | 1.337172  | -2.018400 |
| H O | 2.120305  | 1.827885  | 0.071102  |
| H O | 2.663362  | 1.558104  | -1.611328 |
| H O | 2.281605  | -2.019358 | -1.102162 |
| H O | -1.549468 | 0.059259  | 2.418705  |
| H O | 0.150489  | 0.230409  | 2.856987  |
| H O | -0.556764 | -1.384833 | 2.762865  |
| C O | -2.210757 | 0.459209  | -1.051857 |
| C O | -2.070634 | -0.718169 | -1.782520 |
| C O | -1.824262 | -1.942598 | -1.147564 |
| C O | -1.752622 | -2.039316 | 0.232032  |
| H O | -2.296908 | 1.408919  | -1.573871 |
| H O | -2.703063 | 0.446779  | -0.084809 |
| H O | -1.916924 | -0.656144 | -2.856987 |
| H O | -1.472907 | -2.773329 | -1.755405 |
| H O | -1.401411 | -2.951345 | 0.704653  |
| H O | -2.371151 | -1.407255 | 0.857601  |

#### TS-70+BU

B3LYP/6-31G(d) Geometry

|     |           |           |           |
|-----|-----------|-----------|-----------|
| C O | -0.650504 | -1.101136 | -0.860140 |
| C O | 0.300039  | -0.754868 | 0.292526  |
| O O | -0.547256 | -0.119935 | -1.896609 |
| C O | -2.146432 | -0.953572 | -0.486364 |
| C O | -1.235808 | 0.971293  | -1.326439 |
| C O | 0.366413  | 0.635997  | 0.610769  |
| O O | -2.428674 | 0.423282  | -0.754936 |
| C O | -0.422327 | 1.596559  | -0.181715 |
| O O | -0.563292 | 2.783067  | 0.096664  |
| C O | 0.240424  | -1.750231 | 1.452409  |
| C O | 0.836798  | 1.109417  | 1.963144  |
| H O | -0.420221 | -2.078228 | -1.292249 |
| H O | -2.367395 | -1.182292 | 0.560566  |
| H O | -2.770602 | -1.584561 | -1.131111 |
| H O | -1.493445 | 1.701558  | -2.095373 |
| H O | 0.204300  | -2.783067 | 1.087743  |
| H O | -0.652469 | -1.582289 | 2.067012  |
| H O | 1.106472  | -1.661295 | 2.113719  |
| H O | 1.793240  | 0.659212  | 2.258224  |
| H O | 0.110552  | 0.849900  | 2.747186  |
| H O | 0.938588  | 2.196684  | 1.959033  |
| C O | 2.096843  | -1.326178 | -0.427990 |
| C O | 2.311274  | -0.693951 | -1.659805 |
| C O | 2.427941  | 0.703065  | -1.761193 |
| C O | 2.433087  | 1.521401  | -0.657610 |
| H O | 2.007888  | -2.411139 | -0.430861 |
| H O | 2.624100  | -0.950572 | 0.446293  |
| H O | 2.146660  | -1.258358 | -2.574428 |
| H O | 2.320989  | 1.150751  | -2.747186 |

H O 2.327993 2.597448 -0.755180  
H O 2.770602 1.171681 0.308473

#### P-1+BU

B3LYP/6-31G(d) Geometry

C O -1.470781 1.227799 -0.101928  
C O -2.165122 0.090702 0.000199  
C O -1.527117 -1.274628 0.061025  
C O -0.043446 -1.243389 -0.334317  
C O 0.664544 -0.042317 0.335357  
C O 0.036040 1.291056 -0.136024  
C O 2.110796 -0.061592 0.084465  
N O 3.252526 -0.076397 -0.127344  
H O -1.996978 2.179038 -0.161109  
H O -3.252526 0.129229 0.042614  
H O -2.066017 -1.966397 -0.600158  
H O -1.640511 -1.690639 1.074445  
H O 0.451366 -2.179038 -0.053920  
H O 0.051977 -1.141287 -1.422320  
H O 0.522339 -0.123231 1.422320  
H O 0.385524 1.523477 -1.152478  
H O 0.396400 2.110500 0.498493

#### P-2+BU

B3LYP/6-31G(d) Geometry

C O -1.131056 1.310538 -0.089357  
C O -1.981075 0.278950 -0.070974  
C O -1.536635 -1.162862 -0.024111  
C O -0.047868 -1.315096 -0.369087  
C O 0.795014 -0.250627 0.370753  
C O 0.369307 1.166702 -0.031217  
C O 2.270768 -0.508315 0.153368  
O O 3.053959 0.273625 -0.339944  
H O -1.521350 2.325941 -0.144595  
H O -3.053959 0.464949 -0.093867  
H O -2.139339 -1.762013 -0.720276  
H O -1.737150 -1.582065 0.974784  
H O 0.091735 -1.183469 -1.450274  
H O 0.300696 -2.325941 -0.121473  
H O 0.617969 -0.396265 1.450274  
H O 0.819052 1.421134 -1.001516  
H O 0.789542 1.894393 0.675444  
H O 2.613205 -1.518576 0.479939

#### P-3+BU

B3LYP/6-31G(d) Geometry

C O -2.574525 -1.162425 0.097472  
C O -0.670764 1.171487 0.005028  
C O -2.168234 1.312556 0.124085  
C O -3.015550 0.279480 0.150276  
C O -1.070152 -1.317957 0.363447  
C O -0.272666 -0.246023 -0.428659  
C O 1.187786 -0.528531 -0.320858  
O O 1.993439 0.268575 0.164206  
H O -3.134760 -1.751640 0.835566  
H O -2.831255 -1.595625 -0.881901  
H O -0.185844 1.416591 0.960241  
H O -0.279116 1.902440 -0.713891  
H O -2.554903 2.328131 0.186563  
H O -4.086392 0.464385 0.215726  
H O -0.736571 -2.328131 0.096903  
H O -0.866804 -1.181516 1.432869  
H O -0.523267 -0.391897 -1.493435

H O 1.567064 -1.498780 -0.675684  
B O 3.582942 -0.039671 0.304426  
H O 3.770304 0.057215 1.493435  
H O 3.722788 -1.155612 -0.152659  
H O 4.086392 0.848579 -0.340246

#### P-4+BU

B3LYP/6-31G(d) Geometry

C O 1.320971 1.204639 -0.079475  
C O 1.996617 0.051912 -0.091134  
C O 1.333687 -1.301150 -0.024831  
C O -0.145774 -1.205982 0.381244  
C O -0.819066 -0.056383 -0.378180  
C O -0.185373 1.292655 -0.022796  
N O -2.297716 -0.039972 -0.045157  
O O -3.083419 -0.316562 -0.947051  
O O -2.612773 0.229247 1.112436  
H O 1.859195 2.149728 -0.117482  
H O 3.083419 0.067146 -0.152163  
H O 1.863493 -1.942160 0.692021  
H O 1.429412 -1.807492 -0.997706  
H O -0.663149 -2.149728 0.175478  
H O -0.233197 -1.006597 1.454753  
H O -0.790198 -0.233710 -1.454753  
H O -0.518881 1.588973 0.980400  
H O -0.545645 2.066713 -0.712852

#### P-5+BU

B3LYP/6-31G(d) Geometry

C O 1.248901 1.219648 0.057469  
C O 1.935815 0.079432 -0.059080  
C O 1.284902 -1.280049 -0.113264  
C O -0.186639 -1.234050 0.323476  
C O -0.904889 -0.036684 -0.322463  
C O -0.257045 1.290904 0.113020  
C O -2.391217 -0.048219 -0.022291  
F O -3.022861 1.008096 -0.586417  
F O -2.643558 0.002671 1.308070  
F O -2.987707 -1.167139 -0.496451  
H O 1.781520 2.167804 0.111725  
H O 3.022861 0.111244 -0.117050  
H O 1.836285 -1.982537 0.526051  
H O 1.364789 -1.688019 -1.133314  
H O -0.244770 -1.131087 1.414084  
H O -0.694270 -2.167804 0.059985  
H O -0.825532 -0.125672 -1.414084  
H O -0.583468 1.543579 1.132894  
H O -0.618124 2.106289 -0.525801

#### P-6+BU

B3LYP/6-31G(d) Geometry

C O -1.739445 -1.230422 0.418880  
C O -2.508673 -0.253680 -0.070376  
C O -1.956502 1.032632 -0.631943  
C O -0.480745 1.236866 -0.253899  
C O 0.344384 -0.047403 -0.464938  
C O -0.230069 -1.184926 0.433470  
B O 1.904807 0.034196 -0.184947  
C O 2.868558 -1.036588 -0.833473  
C O 2.502901 1.159956 0.751001  
H O -2.203543 -2.124223 0.836097  
H O -3.591882 -0.372165 -0.067830  
H O -2.560044 1.880290 -0.277395



H O -2.068327 1.033101 -1.728377  
H O -0.061669 2.067294 -0.836966  
H O -0.420957 1.538935 0.801194  
H O 0.190683 -0.381633 -1.505123  
H O 0.111773 -1.067298 1.476262  
H O 0.167899 -2.155391 0.106781  
H O 2.371437 -1.873745 -1.336985  
H O 3.591882 -1.437278 -0.110128  
H O 3.480691 -0.519347 -1.591479  
H O 1.997249 1.163043 1.728377  
H O 2.300972 2.155391 0.327497  
H O 3.581207 1.082184 0.929523

#### P-7+BU

##### B3LYP/6-31G(d) Geometry

C O -1.466901 -0.888172 0.917896  
C O -2.221496 -0.146382 0.102516  
C O -1.655401 0.872437 -0.854346  
C O -0.187136 1.202330 -0.546274  
C O 0.625275 -0.084237 -0.284453  
C O 0.041281 -0.828829 0.956451  
B O 2.166258 0.114732 -0.074805  
Cl O 3.304005 -1.179871 -0.482777  
Cl O 2.838557 1.588232 0.637094  
H O -1.939911 -1.589200 1.604722  
H O -3.304005 -0.266273 0.117481  
H O -2.257683 1.790617 -0.816101  
H O -1.752060 0.502031 -1.887389  
H O 0.249436 1.774763 -1.373329  
H O -0.136074 1.846583 0.340275  
H O 0.489460 -0.758854 -1.142641  
H O 0.363173 -0.335357 1.887389  
H O 0.450314 -1.846583 1.002951

#### P-8+BU

##### B3LYP/6-31G(d) Geometry

C O -1.079973 -1.144907 -0.722515  
C O -1.761812 -0.254281 0.004017  
C O -1.122969 0.690433 0.987480  
C O 0.355484 0.351256 1.273602  
C O 1.072810 -0.083072 -0.001740  
C O 0.420203 -1.315874 -0.635167  
Cl O 2.841493 -0.490702 0.378545  
C O 1.220073 1.051644 -1.021555  
O O 0.917079 2.201457 -0.808646  
H O -1.603125 -1.798699 -1.417691  
H O -2.841493 -0.181357 -0.117358  
H O -1.681819 0.676815 1.932840  
H O -1.197294 1.716968 0.606315  
H O 0.418305 -0.472828 1.992591  
H O 0.864033 1.214903 1.709719  
H O 0.674448 -2.201457 -0.037574  
H O 0.848221 -1.493137 -1.630780  
H O 1.655633 0.733791 -1.992591

#### P-9+BU

##### B3LYP/6-31G(d) Geometry

C O 1.171309 0.976758 0.827438  
C O 1.878161 0.414007 -0.156255  
C O 1.312802 -0.629580 -1.085570  
C O 0.012544 -1.240352 -0.540696  
C O -0.955696 -0.171070 0.017466  
C O -0.271998 0.653833 1.123770

C O -2.239685 -0.849146 0.546536  
C O -1.402802 0.727214 -1.134410  
O O -1.438333 1.936588 -1.123535  
H O 1.639951 1.723879 1.466403  
H O 2.910945 0.717704 -0.320693  
H O 2.051193 -1.425317 -1.253620  
H O 1.137757 -0.182646 -2.077792  
H O 0.249181 -1.936588 0.274519  
H O -0.488051 -1.829738 -1.321072  
H O -0.338099 0.108445 2.077792  
H O -0.831962 1.586303 1.266175  
H O -1.982187 -1.602601 1.299770  
H O -2.790019 -1.354467 -0.256848  
H O -2.910945 -0.117018 1.009556  
H O -1.750580 0.161022 -2.032501

#### P-10+BU

##### B3LYP/6-31G(d) Geometry

C O 1.570461 -1.413879 -0.208210  
C O 1.950318 -0.134221 -0.201377  
C O 0.984424 1.017839 -0.114815  
C O -0.486718 0.625212 -0.363831  
C O -0.801160 -0.698819 0.358720  
C O 0.130681 -1.848221 -0.118855  
C O -2.222027 -1.198511 0.188558  
O O -3.010110 -0.820884 -0.651535  
C O -1.419028 1.772066 0.051025  
H O 2.315405 -2.204243 -0.288945  
H O 3.010110 0.111722 -0.255998  
H O 1.273552 1.798128 -0.833087  
H O 1.074551 1.492986 0.876245  
H O -0.617481 0.447034 -1.440076  
H O -0.630497 -0.569941 1.440076  
H O -0.207111 -2.210214 -1.102721  
H O 0.038604 -2.707133 0.560272  
H O -2.501796 -2.022476 0.887018  
H O -1.113406 2.707133 -0.433587  
H O -1.378570 1.936756 1.136274  
H O -2.454588 1.567662 -0.228972

#### P-11+BU

##### B3LYP/6-31G(d) Geometry

C O 1.938674 -0.389650 -0.117546  
C O 1.806348 0.936822 -0.183150  
C O 0.480144 1.649331 -0.160308  
C O -0.709720 0.687888 -0.406635  
C O -0.539460 -0.621016 0.399404  
C O 0.774452 -1.339564 -0.002950  
C O -1.686574 -1.593505 0.192118  
O O -2.491972 -1.516965 -0.707877  
C O -1.968918 1.370521 -0.077731  
N O -2.929616 1.953264 0.213857  
H O 2.929616 -0.838334 -0.156922  
H O 2.692628 1.564587 -0.254596  
H O 0.461305 2.440467 -0.920099  
H O 0.346098 2.161810 0.803063  
H O -0.747613 0.423074 -1.470441  
H O -0.483719 -0.380050 1.470441  
H O 0.631015 -1.864220 -0.960280  
H O 0.998823 -2.121831 0.734153  
H O -1.714976 -2.440467 0.913845



### P-12+BU

#### B3LYP/6-31G(d) Geometry

|      |           |           |           |
|------|-----------|-----------|-----------|
| C 0  | 1.815516  | -0.795933 | 1.163820  |
| C 0  | 1.664542  | 1.205129  | -1.078874 |
| C 0  | 2.520062  | -0.041650 | -1.125123 |
| C 0  | 2.583169  | -0.926189 | -0.124999 |
| C 0  | 1.122507  | 0.575502  | 1.316189  |
| C 0  | 0.563615  | 1.058304  | -0.021610 |
| C 0  | -0.573856 | 0.216334  | -0.547918 |
| O 0  | -1.107792 | -0.657080 | 0.132517  |
| Cl 0 | -0.280867 | 2.692723  | 0.190738  |
| H 0  | 1.072436  | -1.601568 | 1.227929  |
| H 0  | 2.491684  | -0.946940 | 2.015598  |
| H 0  | 2.269042  | 2.088331  | -0.833898 |
| H 0  | 1.218045  | 1.407968  | -2.060433 |
| H 0  | 3.103429  | -0.195869 | -2.030198 |
| H 0  | 3.212689  | -1.807600 | -0.232408 |
| H 0  | 0.324126  | 0.521296  | 2.060433  |
| H 0  | 1.844194  | 1.325344  | 1.656864  |
| H 0  | -0.944485 | 0.412314  | -1.562963 |
| B 0  | -2.349682 | -1.575693 | -0.391935 |
| H 0  | -1.899892 | -2.692723 | -0.299406 |
| H 0  | -3.212689 | -1.331922 | 0.415472  |
| H 0  | -2.561605 | -1.189349 | -1.520977 |

### P-13+BU

#### B3LYP/6-31G(d) Geometry

|     |           |           |           |
|-----|-----------|-----------|-----------|
| C 0 | 1.810599  | -1.527104 | 1.048780  |
| C 0 | 2.112675  | 0.631690  | -1.024016 |
| C 0 | 2.689526  | -0.755745 | -1.173919 |
| C 0 | 2.544662  | -1.714942 | -0.253548 |
| C 0 | 1.446489  | -0.056288 | 1.317344  |
| C 0 | 0.993031  | 0.684947  | 0.042656  |
| C 0 | -0.252044 | 0.076776  | -0.542607 |
| O 0 | -1.028152 | -0.622800 | 0.110980  |
| C 0 | 0.622041  | 2.158618  | 0.355920  |
| H 0 | 0.905232  | -2.149463 | 1.049521  |
| H 0 | 2.426470  | -1.905714 | 1.875793  |
| H 0 | 2.899669  | 1.347811  | -0.743999 |
| H 0 | 1.726307  | 0.987400  | -1.990022 |
| H 0 | 3.249477  | -0.958723 | -2.084926 |
| H 0 | 2.970770  | -2.699781 | -0.438498 |
| H 0 | 0.668136  | 0.005759  | 2.084926  |
| H 0 | 2.324314  | 0.475991  | 1.704908  |
| H 0 | -0.515745 | 0.305904  | -1.586767 |
| H 0 | 0.307287  | 2.699781  | -0.543999 |
| H 0 | 1.500157  | 2.669378  | 0.765890  |
| H 0 | -0.185529 | 2.215310  | 1.093005  |
| B 0 | -2.416609 | -1.222839 | -0.485728 |
| H 0 | -2.272330 | -2.415054 | -0.357132 |
| H 0 | -3.249477 | -0.752460 | 0.251874  |
| H 0 | -2.457936 | -0.826293 | -1.632148 |

### P-14+BU

#### B3LYP/6-31G(d) Geometry

|     |           |           |           |
|-----|-----------|-----------|-----------|
| C 0 | 2.546711  | -1.729748 | 0.121245  |
| C 0 | 0.688413  | 0.640475  | -0.270893 |
| C 0 | 2.184862  | 0.670970  | -0.495990 |
| C 0 | 3.012022  | -0.359845 | -0.301162 |
| C 0 | 1.033124  | -1.895839 | -0.064376 |
| C 0 | 0.280928  | -0.644947 | 0.476514  |
| C 0 | -1.181224 | -0.943520 | 0.442909  |
| O 0 | -1.972442 | -0.372324 | -0.310924 |

|     |           |           |           |
|-----|-----------|-----------|-----------|
| C 0 | 0.225781  | 1.905388  | 0.477318  |
| H 0 | 3.068630  | -2.499684 | -0.462324 |
| H 0 | 2.823261  | -1.915384 | 1.170893  |
| H 0 | 0.184735  | 0.636214  | -1.248861 |
| H 0 | 2.590770  | 1.627899  | -0.822344 |
| H 0 | 4.081180  | -0.227149 | -0.458134 |
| H 0 | 0.682416  | -2.805391 | 0.438196  |
| H 0 | 0.800570  | -2.005666 | -1.130744 |
| H 0 | 0.549292  | -0.550993 | 1.542103  |
| H 0 | -1.571710 | -1.740757 | 1.093513  |
| H 0 | 0.518316  | 2.805391  | -0.074650 |
| H 0 | 0.683357  | 1.962089  | 1.472569  |
| H 0 | -0.862354 | 1.925964  | 0.591366  |
| B 0 | -3.556351 | -0.729665 | -0.385984 |
| H 0 | -4.081180 | 0.318871  | -0.096504 |
| H 0 | -3.705925 | -1.044418 | -1.542103 |
| H 0 | -3.709221 | -1.625378 | 0.418907  |

### P-15+BU

#### B3LYP/6-31G(d) Geometry

|     |           |           |           |
|-----|-----------|-----------|-----------|
| C 0 | -1.079469 | -0.522839 | 1.432469  |
| C 0 | -1.179289 | 0.473457  | -1.419122 |
| C 0 | -1.369713 | 1.359713  | -0.213316 |
| C 0 | -1.316333 | 0.913955  | 1.045667  |
| C 0 | -1.144122 | -1.493150 | 0.222229  |
| C 0 | -0.495853 | -0.857464 | -1.037317 |
| C 0 | 0.982913  | -0.669209 | -0.869548 |
| O 0 | 1.627223  | -1.221988 | 0.022089  |
| C 0 | -2.529827 | -1.871438 | -0.089221 |
| N 0 | -3.622708 | -2.164675 | -0.348741 |
| H 0 | -1.815396 | -0.835623 | 2.182695  |
| H 0 | -0.097510 | -0.626526 | 1.911320  |
| H 0 | -2.145863 | 0.255803  | -1.892907 |
| H 0 | -0.582387 | 0.989694  | -2.182695 |
| H 0 | -1.571519 | 2.411230  | -0.405213 |
| H 0 | -1.449253 | 1.614499  | 1.867571  |
| H 0 | -0.602724 | -2.411230 | 0.476332  |
| H 0 | -0.593905 | -1.551761 | -1.888447 |
| H 0 | 1.521331  | -0.038208 | -1.591840 |
| B 0 | 3.245973  | -1.071582 | 0.192739  |
| H 0 | 3.348102  | -0.609613 | 1.303102  |
| H 0 | 3.622708  | -2.214292 | 0.102244  |
| H 0 | 3.577402  | -0.337342 | -0.713219 |

### P-16+BU

#### B3LYP/6-31G(d) Geometry

|     |           |           |           |
|-----|-----------|-----------|-----------|
| C 0 | -1.459446 | -1.019162 | -1.138181 |
| C 0 | -2.139520 | -0.575485 | -0.077853 |
| C 0 | -1.490319 | -0.173083 | 1.220930  |
| C 0 | -0.032421 | -0.639918 | 1.313511  |
| C 0 | 0.732341  | -0.373017 | -0.022045 |
| C 0 | 0.041105  | -1.160114 | -1.180785 |
| C 0 | 0.724814  | 1.075967  | -0.318585 |
| N 0 | 0.695136  | 2.214631  | -0.538917 |
| C 0 | 2.134228  | -0.815791 | 0.109913  |
| N 0 | 3.221794  | -1.203641 | 0.224019  |
| H 0 | -1.988998 | -1.299450 | -2.046222 |
| H 0 | -3.221794 | -0.479870 | -0.138478 |
| H 0 | -2.049183 | -0.595182 | 2.066199  |
| H 0 | -1.548632 | 0.918492  | 1.340176  |
| H 0 | 0.011177  | -1.720326 | 1.490166  |
| H 0 | 0.488424  | -0.147890 | 2.139921  |
| H 0 | 0.336644  | -2.214631 | -1.094409 |

H O 0.437429 -0.808379 -2.139921

**P-17+BU**

B3LYP/6-31G(d) Geometry

C O 1.496453 -1.299855 -0.956896  
C O 2.172247 -0.549751 -0.082164  
C O 1.518882 0.374212 0.914767  
C O 0.023856 0.622747 0.596285  
C O -0.650324 -0.735159 0.226606  
C O -0.008093 -1.343008 -1.040085  
C O -2.106679 -0.611191 0.097808  
N O -3.259694 -0.521735 -0.000672  
C O -0.129747 1.603173 -0.489471  
N O -0.237128 2.376810 -1.347981  
H O 2.038893 -1.923279 -1.664562  
H O 3.259694 -0.582578 -0.071229  
H O 2.046484 1.334830 0.944200  
H O 1.593924 -0.042814 1.929678  
H O -0.473268 1.036799 1.481120  
H O -0.454704 -1.409937 1.070559  
H O -0.358918 -0.802151 -1.929678  
H O -0.355321 -2.376810 -1.154882

**P-18+BU**

B3LYP/6-31G(d) Geometry

C O -1.860107 -0.667059 0.024112  
C O -1.860103 0.667067 -0.024119  
C O -0.608682 1.504995 -0.041441  
C O 0.642453 0.689124 0.365260  
C O 0.642450 -0.689128 -0.365262  
C O -0.608690 -1.504992 0.041440  
C O 1.861917 -1.460062 -0.093958  
N O 2.804289 -2.096967 0.136923  
C O 1.861922 1.460054 0.093956  
N O 2.804282 2.096977 -0.136931  
H O -2.804289 -1.207140 0.053619  
H O -2.804283 1.207153 -0.053630  
H O -0.710823 2.355715 0.643210  
H O -0.454596 1.941838 -1.038412  
H O 0.604342 0.493645 1.444825  
H O 0.604340 -0.493650 -1.444825  
H O -0.454608 -1.941833 1.038412  
H O -0.710833 -2.355715 -0.643209

**P-19+BU**

B3LYP/6-31G(d) Geometry

C O 1.642537 -1.593459 -0.073207  
C O 2.142636 -0.358236 0.013001  
C O 1.289541 0.883388 0.054721  
C O -0.178212 0.636271 -0.342301  
C O -0.671570 -0.669933 0.340708  
C O 0.166268 -1.891164 -0.111630  
C O -2.098212 -0.917621 0.092793  
N O -3.221455 -1.123412 -0.119169  
C O -1.055206 1.848488 -0.012351  
H O 2.313501 -2.449622 -0.117531  
H O 3.221455 -0.216882 0.057785  
H O 1.328730 1.325856 1.063713  
H O 1.713262 1.647311 -0.611881  
H O -0.214059 0.461686 -1.426903  
H O -0.547863 -0.548454 1.426903  
H O -0.136938 -2.188136 -1.126192  
H O -0.065943 -2.749561 0.531292

H O -0.660940 2.749561 -0.495999

H O -1.078316 2.034689 1.069125

H O -2.085778 1.705816 -0.352033

**P-20+BU**

B3LYP/6-31G(d) Geometry

C O 1.260503 -0.574481 -1.163497  
C O 1.862023 0.240398 -0.292553  
C O 1.188513 0.773612 0.946037  
C O -0.101696 0.009903 1.272089  
C O -0.981258 -0.231093 0.016869  
C O -0.165372 -1.046894 -1.023522  
C O -1.348086 1.075129 -0.569381  
N O -1.652258 2.103123 -1.016076  
C O -2.280314 -0.974886 0.392497  
H O 1.804948 -0.931367 -2.036077  
H O 2.888015 0.556401 -0.474009  
H O 0.970844 1.843787 0.813429  
H O 1.874660 0.713454 1.801504  
H O 0.146565 -0.978118 1.681430  
H O -0.681748 0.540181 2.036077  
H O -0.673387 -1.012270 -1.995906  
H O -0.183334 -2.103123 -0.713748  
H O -2.883158 -0.386102 1.091216  
H O -2.031823 -1.929444 0.869578  
H O -2.888015 -1.180001 -0.494986

**P-21+BU**

B3LYP/6-31G(d) Geometry

C O -1.960486 -0.874702 -0.131737  
C O -1.127707 -1.918280 -0.126738  
C O 0.371466 -1.782444 -0.076557  
C O 0.835794 -0.345440 -0.387179  
C O -0.033393 0.683826 0.393995  
C O -1.501745 0.555816 -0.044753  
C O 0.457329 2.122046 0.237737  
O O -0.053972 2.931480 -0.504339  
C O 2.324159 -0.200373 -0.112513  
F O 3.034377 -1.199809 -0.678366  
F O 2.596552 -0.214994 1.215295  
F O 2.818277 0.960520 -0.606294  
H O -3.034377 -1.042018 -0.195103  
H O -1.522841 -2.931480 -0.169654  
H O 0.833723 -2.469392 -0.795270  
H O 0.748708 -2.086374 0.911567  
H O 0.708954 -0.153626 -1.459917  
H O 0.059654 0.431750 1.459917  
H O -1.635750 1.069316 -1.006274  
H O -2.133187 1.107081 0.664460  
H O 1.323996 2.404007 0.869448

**P-22+BU**

B3LYP/6-31G(d) Geometry

C O -1.927905 -1.886281 -0.029976  
C O -2.678177 -0.793758 -0.192077  
C O -2.101382 0.592466 -0.324441  
C O -0.620333 0.672316 0.091553  
C O 0.175802 -0.516776 -0.501884  
C O -0.419800 -1.861773 0.011525  
B O 1.731886 -0.538356 -0.176279  
C O -0.020541 2.027232 -0.306662  
C O 2.756711 -0.852629 -1.337388

|     |           |           |           |
|-----|-----------|-----------|-----------|
| C O | 2.280447  | -0.307040 | 1.289123  |
| H O | -2.405919 | -2.859408 | 0.081725  |
| H O | -3.763120 | -0.886372 | -0.231921 |
| H O | -2.691869 | 1.298131  | 0.278429  |
| H O | -2.211848 | 0.938353  | -1.366032 |
| H O | -0.581977 | 0.590044  | 1.188124  |
| H O | 0.019786  | -0.499834 | -1.593133 |
| H O | -0.086895 | -2.060711 | 1.043584  |
| H O | -0.025907 | -2.696405 | -0.586238 |
| H O | -0.617406 | 2.859408  | 0.086966  |
| H O | 0.014980  | 2.133941  | -1.398957 |
| H O | 1.001310  | 2.146930  | 0.074197  |
| H O | 2.863211  | 0.066802  | -1.938105 |
| H O | 2.383968  | -1.610948 | -2.039406 |
| H O | 3.763120  | -1.137723 | -1.009198 |
| H O | 2.749875  | -1.238795 | 1.642249  |
| H O | 1.543590  | -0.000532 | 2.039406  |
| H O | 3.095298  | 0.431595  | 1.285508  |

#### P-23+BU

B3LYP/6-31G(d) Geometry

|      |           |           |           |
|------|-----------|-----------|-----------|
| C O  | -1.501955 | -1.886839 | -0.058443 |
| C O  | -2.258363 | -0.797167 | -0.207541 |
| C O  | -1.693975 | 0.597941  | -0.278062 |
| C O  | -0.222726 | 0.688634  | 0.168121  |
| C O  | 0.588685  | -0.488706 | -0.445870 |
| C O  | 0.002599  | -1.850611 | 0.031641  |
| B O  | 2.126482  | -0.438994 | -0.131696 |
| C O  | 0.364883  | 2.060132  | -0.189460 |
| Cl O | 3.340101  | -0.520507 | -1.416244 |
| Cl O | 2.721450  | -0.359635 | 1.536768  |
| H O  | -1.969971 | -2.868512 | 0.003977  |
| H O  | -3.340101 | -0.898143 | -0.285031 |
| H O  | -2.299323 | 1.273979  | 0.342914  |
| H O  | -1.792881 | 0.982828  | -1.306686 |
| H O  | -0.194041 | 0.573331  | 1.260808  |
| H O  | 0.461608  | -0.441835 | -1.536768 |
| H O  | 0.312864  | -2.054301 | 1.067501  |
| H O  | 0.426044  | -2.666625 | -0.570151 |
| H O  | -0.259466 | 2.868512  | 0.209416  |
| H O  | 0.423530  | 2.192580  | -1.277379 |
| H O  | 1.373082  | 2.194628  | 0.220403  |

#### P-24+BU

B3LYP/6-31G(d) Geometry

|     |           |           |           |
|-----|-----------|-----------|-----------|
| C O | -1.692842 | 0.663280  | -0.071607 |
| C O | -1.692742 | -0.664000 | 0.071588  |
| C O | -0.437321 | -1.493781 | 0.155752  |
| C O | 0.796062  | -0.695749 | -0.305698 |
| C O | 0.795951  | 0.695402  | 0.305695  |
| C O | -0.437546 | 1.493251  | -0.155762 |
| N O | 2.027738  | 1.487421  | -0.095195 |
| N O | 2.027956  | -1.487583 | 0.095222  |
| O O | 2.288283  | 2.461758  | 0.598489  |
| O O | 2.634911  | 1.137647  | -1.103484 |
| O O | 2.288786  | -2.461758 | -0.598575 |
| O O | 2.634906  | -1.137859 | 1.103668  |
| H O | -2.634911 | 1.203069  | -0.136484 |
| H O | -2.634730 | -1.203930 | 0.136459  |
| H O | -0.520942 | -2.394414 | -0.462119 |
| H O | -0.281926 | -1.840465 | 1.188052  |

|     |           |           |           |
|-----|-----------|-----------|-----------|
| H O | 0.842031  | -0.644531 | -1.393321 |
| H O | 0.841908  | 0.644179  | 1.393321  |
| H O | -0.282203 | 1.839963  | -1.188061 |
| H O | -0.521304 | 2.393871  | 0.462108  |

#### P-25+BU

B3LYP/6-31G(d) Geometry

|     |           |           |           |
|-----|-----------|-----------|-----------|
| C O | 1.127710  | -1.967833 | 1.094641  |
| C O | 1.994627  | -1.706335 | 0.110869  |
| C O | 1.678091  | -0.810248 | -1.062908 |
| C O | -0.285971 | -1.443792 | 1.129753  |
| C O | 0.456266  | 0.094029  | -0.767860 |
| C O | -0.685642 | -0.804948 | -0.219320 |
| C O | 0.843600  | 1.247170  | 0.147984  |
| C O | -2.095549 | -0.189914 | -0.196091 |
| O O | -2.989121 | -0.636891 | -0.878773 |
| O O | -2.312621 | 0.839100  | 0.642270  |
| O O | 0.228561  | 1.638500  | 1.128738  |
| O O | 1.969087  | 1.866879  | -0.247669 |
| H O | 1.432614  | -2.603566 | 1.924360  |
| H O | 2.989121  | -2.147935 | 0.136046  |
| H O | 2.546188  | -0.194813 | -1.318069 |
| H O | 1.459015  | -1.412970 | -1.955805 |
| H O | -0.399478 | -0.729736 | 1.955805  |
| H O | -0.979620 | -2.266318 | 1.348420  |
| H O | 0.135488  | 0.562037  | -1.709275 |
| H O | -0.781318 | -1.614177 | -0.948950 |
| H O | -1.463315 | 1.134947  | 1.042469  |
| H O | 2.115476  | 2.603566  | 0.376736  |

#### P-26+BU

B3LYP/6-31G(d) Geometry

|     |           |           |           |
|-----|-----------|-----------|-----------|
| C O | 1.865306  | 0.668322  | -0.711914 |
| C O | 1.860886  | -0.650514 | -0.916279 |
| C O | 0.610545  | -1.483277 | -1.022590 |
| C O | -0.650372 | -0.731907 | -0.485012 |
| C O | -0.636591 | 0.736227  | -1.059661 |
| C O | 0.617850  | 1.499316  | -0.576686 |
| C O | -0.625354 | -0.695802 | 0.992005  |
| C O | -1.861155 | -1.448811 | -0.929228 |
| N O | -2.785049 | -2.028898 | -1.323160 |
| N O | -0.576208 | -0.658699 | 2.150128  |
| C O | -1.861353 | 1.475517  | -0.735264 |
| N O | -2.811356 | 2.089806  | -0.478029 |
| H O | 2.811356  | 1.197416  | -0.623268 |
| H O | 2.800650  | -1.189205 | -1.012613 |
| H O | 0.718680  | -2.420105 | -0.465214 |
| H O | 0.415828  | -1.767785 | -2.065427 |
| H O | -0.589927 | 0.625860  | -2.150128 |
| H O | 0.479905  | 1.816902  | 0.465565  |
| H O | 0.704716  | 2.420105  | -1.165651 |

#### P-27+BU

B3LYP/6-31G(d) Geometry

|     |           |           |           |
|-----|-----------|-----------|-----------|
| C O | -1.786852 | -1.109061 | -0.339652 |
| C O | -1.940979 | 0.126838  | 0.140554  |
| C O | -0.812424 | 1.117313  | 0.245465  |
| C O | 0.435240  | 0.709124  | -0.560792 |
| C O | 0.757691  | -0.808270 | -0.355025 |
| C O | -0.464779 | -1.654434 | -0.811261 |
| C O | 1.009498  | -1.060474 | 1.079424  |
| N O | 1.228003  | -1.249734 | 2.204413  |

C O 2.006329 -1.253163 -1.150177  
C O 1.610636 1.643447 -0.248606  
H O -2.641600 -1.780401 -0.401643  
H O -2.920296 0.452497 0.487729  
H O -0.540269 1.255154 1.303682  
H O -1.149386 2.103893 -0.102163  
H O 0.189148 0.801991 -1.628879  
H O -0.335985 -2.688167 -0.465061  
H O -0.446250 -1.704159 -1.910969  
H O 2.920296 -0.789862 -0.770791  
H O 1.887383 -0.977900 -2.204413  
H O 2.130262 -2.339565 -1.090987  
H O 1.955329 1.513159 0.784163  
H O 1.300426 2.688167 -0.365873  
H O 2.461994 1.477928 -0.916086

#### P-28+BU

B3LYP/6-31G(d) Geometry

C O 1.604884 -1.597708 -0.606389  
C O 2.133399 -0.380453 -0.457021  
C O 1.301795 0.870024 -0.351400  
C O -0.171937 0.659555 -0.747495  
C O -0.719123 -0.671995 -0.125702  
C O 0.121930 -1.860413 -0.679346  
C O -2.116454 -0.865090 -0.558706  
N O -3.214831 -1.022972 -0.902161  
C O -1.016395 1.897841 -0.424257  
C O -0.688130 -0.670538 1.421967  
H O 2.256230 -2.466127 -0.690761  
H O 3.214831 -0.264310 -0.401696  
H O 1.363979 1.274297 0.671738  
H O 1.726865 1.653683 -0.994112  
H O -0.200471 0.510314 -1.836008  
H O -0.169556 -2.062210 -1.720111  
H O -0.130178 -2.770503 -0.119574  
H O -0.620270 2.770503 -0.956213  
H O -1.000138 2.133548 0.646132  
H O -2.059612 1.765223 -0.728403  
H O -1.247900 0.172639 1.836008  
H O 0.344591 -0.618149 1.777100  
H O -1.134586 -1.591643 1.809477

#### P-29+BU

B3LYP/6-31G(d) Geometry

C O 0.021507 1.355998 1.114934  
C O 0.372699 1.874944 -0.064181  
C O 0.487762 1.067702 -1.331044  
C O 0.526861 -0.454831 -1.052031  
C O -0.560066 -0.869702 0.004804  
C O -0.309328 -0.098987 1.328062  
C O -0.564357 -2.394540 0.244407  
C O -1.873587 -0.484519 -0.548784  
C O 1.859237 -0.869253 -0.587734  
N O -2.910766 -0.206293 -0.990362  
N O 2.910766 -1.199764 -0.222949  
H O -0.030433 1.997022 1.992440  
H O 0.585608 2.938738 -0.144156  
H O 1.386792 1.355505 -1.888685  
H O -0.364124 1.276770 -1.992440  
H O 0.327310 -0.998020 -1.984070  
H O 0.512821 -0.597136 1.861835  
H O -1.193172 -0.198691 1.970034  
H O 0.411101 -2.714418 0.622859

H O -0.776658 -2.938738 -0.681379  
H O -1.328598 -2.662120 0.980434

#### P-30+BU

B3LYP/6-31G(d) Geometry

C O -1.660901 -1.442492 0.135638  
C O -2.145930 -0.305683 -0.369120  
C O -1.284049 0.841585 -0.829894  
C O 0.191294 0.744963 -0.352290  
C O 0.659125 -0.739167 -0.548701  
C O -0.189754 -1.724827 0.287090  
C O 2.090952 -0.917903 -0.277212  
N O 3.221607 -1.072691 -0.064711  
C O 0.258411 1.090439 1.081975  
N O 0.309964 1.375133 2.206222  
C O 1.078495 1.728081 -1.144581  
H O -2.343187 -2.221055 0.470328  
H O -3.221607 -0.170396 -0.461607  
H O -1.704540 1.793389 -0.482400  
H O -1.283282 0.898853 -1.928900  
H O 0.500633 -0.962392 -1.612686  
H O 0.105208 -1.661932 1.343460  
H O 0.038813 -2.748667 -0.032789  
H O 0.695819 2.748667 -1.047200  
H O 1.072954 1.456911 -2.206222  
H O 2.110997 1.710131 -0.786131

#### P-31+BU

B3LYP/6-31G(d) Geometry

C O -1.167301 -1.901954 -0.185560  
C O -1.950318 -0.826200 -0.304142  
C O -1.416378 0.570863 -0.496719  
C O 0.084052 0.729604 -0.146283  
C O 0.844592 -0.492078 -0.779053  
C O 0.334483 -1.839625 -0.244046  
C O 2.348954 -0.370207 -0.627519  
O O 3.033119 -1.075457 0.084307  
C O 0.265688 0.752921 1.385178  
C O 0.585347 2.062796 -0.734969  
H O -1.614869 -2.883676 -0.036378  
H O -3.033119 -0.938419 -0.267984  
H O -1.995801 1.277111 0.115689  
H O -1.584833 0.885206 -1.539640  
H O 0.647068 -0.437608 -1.862396  
H O 0.770449 -2.032630 0.745358  
H O 0.718600 -2.647223 -0.881883  
H O 2.824825 0.434144 -1.230874  
H O -0.194827 -0.117279 1.862396  
H O -0.205426 1.649666 1.805317  
H O 1.325180 0.770470 1.664997  
H O -0.067929 2.883676 -0.415095  
H O 0.582519 2.045751 -1.832126  
H O 1.599937 2.308009 -0.402048

#### P-32+BU

B3LYP/6-31G(d) Geometry

C O 1.882616 0.485659 -0.698971  
C O 1.853275 -0.839561 -0.856617  
C O 0.583789 -1.640740 -0.977620  
C O -0.664831 -0.843122 -0.476463  
C O -0.617973 0.613635 -1.067665  
C O 0.654244 1.351339 -0.632910  
C O -1.880815 1.415830 -0.759232

|   |   |           |           |           |
|---|---|-----------|-----------|-----------|
| O | 0 | -1.859408 | 2.573682  | -0.412710 |
| C | 0 | -0.668006 | -0.784565 | 1.001277  |
| C | 0 | -1.884663 | -1.547623 | -0.922695 |
| N | 0 | -2.821760 | -2.106868 | -1.317481 |
| N | 0 | -0.658751 | -0.724601 | 2.159781  |
| H | 0 | 2.840339  | 0.991591  | -0.595958 |
| H | 0 | 2.780556  | -1.406349 | -0.899415 |
| H | 0 | 0.654075  | -2.573682 | -0.407257 |
| H | 0 | 0.398949  | -1.931041 | -2.020881 |
| H | 0 | -0.609099 | 0.470825  | -2.159781 |
| H | 0 | 0.521442  | 1.749166  | 0.382302  |
| H | 0 | 0.774534  | 2.234597  | -1.270985 |
| H | 0 | -2.840339 | 0.876189  | -0.901255 |

#### P-33+BU

##### B3LYP/6-31G(d) Geometry

|   |   |           |           |           |
|---|---|-----------|-----------|-----------|
| C | 0 | 1.858285  | 0.318582  | 0.586126  |
| C | 0 | 1.858284  | -0.318583 | -0.586130 |
| C | 0 | 0.612633  | -0.722733 | -1.327718 |
| C | 0 | -0.654153 | -0.682633 | -0.415823 |
| C | 0 | -0.654152 | 0.682635  | 0.415823  |
| C | 0 | 0.612637  | 0.722734  | 1.327716  |
| C | 0 | -0.627845 | 1.812507  | -0.534831 |
| C | 0 | -0.627846 | -1.812505 | 0.534831  |
| C | 0 | -1.867879 | -0.788630 | -1.246588 |
| N | 0 | -2.800383 | -0.869947 | -1.931042 |
| N | 0 | -0.581104 | -2.701244 | 1.278292  |
| N | 0 | -0.581113 | 2.701244  | -1.278297 |
| C | 0 | -1.867875 | 0.788634  | 1.246591  |
| N | 0 | -2.800375 | 0.869942  | 1.931051  |
| H | 0 | 2.800383  | 0.569164  | 1.067103  |
| H | 0 | 2.800380  | -0.569169 | -1.067108 |
| H | 0 | 0.707330  | -1.738001 | -1.727557 |
| H | 0 | 0.436617  | -0.063284 | -2.187012 |
| H | 0 | 0.436622  | 0.063287  | 2.187012  |
| H | 0 | 0.707336  | 1.738003  | 1.727553  |

#### P-34+BU

##### B3LYP/6-31G(d) Geometry

|   |   |           |           |           |
|---|---|-----------|-----------|-----------|
| C | 0 | 1.488537  | -1.037928 | -1.493301 |
| C | 0 | 2.064486  | -0.813403 | -0.310641 |
| C | 0 | 1.357783  | -0.187760 | 0.862283  |
| C | 0 | 0.017069  | 0.500116  | 0.487587  |
| C | 0 | -0.777862 | -0.456023 | -0.508072 |
| C | 0 | 0.055748  | -0.699381 | -1.805912 |
| C | 0 | -1.025917 | -1.744034 | 0.174097  |
| C | 0 | 0.301870  | 1.756355  | -0.232023 |
| C | 0 | -0.806466 | 0.823333  | 1.751627  |
| N | 0 | 0.534358  | 2.755075  | -0.775727 |
| N | 0 | -1.207436 | -2.755075 | 0.713183  |
| C | 0 | -2.084382 | 0.131327  | -0.865282 |
| N | 0 | -3.102335 | 0.600881  | -1.163369 |
| H | 0 | 2.061245  | -1.485932 | -2.301763 |
| H | 0 | 3.102335  | -1.098088 | -0.153805 |
| H | 0 | 2.002368  | 0.560620  | 1.338823  |
| H | 0 | 1.153973  | -0.946933 | 1.630242  |
| H | 0 | -0.006674 | 0.205844  | -2.423434 |
| H | 0 | -0.420102 | -1.502469 | -2.379131 |
| H | 0 | -0.218410 | 1.455358  | 2.423434  |
| H | 0 | -1.060066 | -0.101717 | 2.278495  |
| H | 0 | -1.729560 | 1.352774  | 1.501166  |

#### P-35+BU

##### B3LYP/6-31G(d) Geometry

|   |   |           |           |           |
|---|---|-----------|-----------|-----------|
| C | 0 | -1.629270 | 1.501921  | -0.138493 |
| C | 0 | -0.920562 | 1.604260  | -1.264233 |
| C | 0 | 0.234260  | 0.700576  | -1.604296 |
| C | 0 | 0.772939  | -0.049436 | -0.342860 |
| C | 0 | -0.434064 | -0.664825 | 0.481698  |
| C | 0 | -1.375515 | 0.468355  | 0.926176  |
| C | 0 | 0.072161  | -1.474722 | 1.695571  |
| C | 0 | 1.512287  | 0.896939  | 0.518857  |
| C | 0 | 1.720249  | -1.099953 | -0.772990 |
| C | 0 | -1.177667 | -1.666307 | -0.417455 |
| N | 0 | 2.443013  | -1.931602 | -1.137497 |
| N | 0 | 2.077537  | 1.642899  | 1.204530  |
| O | 0 | -2.381118 | -1.755704 | -0.479298 |
| H | 0 | -2.443013 | 2.199308  | 0.048146  |
| H | 0 | -1.163144 | 2.368661  | -1.998626 |
| H | 0 | 1.056884  | 1.266869  | -2.054824 |
| H | 0 | -0.059769 | -0.052584 | -2.349203 |
| H | 0 | -0.970417 | 0.952327  | 1.825597  |
| H | 0 | -2.325397 | 0.008450  | 1.221019  |
| H | 0 | 0.682101  | -0.842424 | 2.349203  |
| H | 0 | 0.676985  | -2.335079 | 1.389786  |
| H | 0 | -0.781420 | -1.843280 | 2.273272  |
| H | 0 | -0.524842 | -2.368661 | -0.979181 |

#### P-36+BU

##### B3LYP/6-31G(d) Geometry

|   |   |           |           |           |
|---|---|-----------|-----------|-----------|
| C | 0 | 1.656470  | -1.208848 | -0.639396 |
| C | 0 | 2.013354  | -0.019200 | -0.148124 |
| C | 0 | 1.023113  | 1.003200  | 0.342236  |
| C | 0 | -0.438934 | 0.744261  | -0.112585 |
| C | 0 | -0.754471 | -0.784092 | 0.084891  |
| C | 0 | 0.221938  | -1.649062 | -0.771143 |
| C | 0 | -2.157736 | -1.207727 | -0.340433 |
| O | 0 | -3.069557 | -0.508923 | -0.725052 |
| C | 0 | -0.567362 | 1.147756  | -1.600808 |
| C | 0 | -1.372227 | 1.653327  | 0.713800  |
| C | 0 | -0.625115 | -1.240037 | 1.563277  |
| H | 0 | 2.417102  | -1.908128 | -0.983942 |
| H | 0 | 3.069557  | 0.238160  | -0.077018 |
| H | 0 | 1.323104  | 2.002799  | -0.003611 |
| H | 0 | 1.072571  | 1.056060  | 1.441320  |
| H | 0 | -0.071988 | -1.620738 | -1.831621 |
| H | 0 | 0.127038  | -2.702572 | -0.472414 |
| H | 0 | -2.307135 | -2.312462 | -0.262046 |
| H | 0 | 0.161861  | 0.630101  | -2.231969 |
| H | 0 | -0.379212 | 2.223197  | -1.704720 |
| H | 0 | -1.570844 | 0.945782  | -1.981911 |
| H | 0 | -1.093406 | 2.702572  | 0.556327  |
| H | 0 | -1.294458 | 1.459342  | 1.789169  |
| H | 0 | -2.414773 | 1.530472  | 0.413061  |
| H | 0 | -1.264403 | -0.657192 | 2.231969  |
| H | 0 | 0.409820  | -1.152521 | 1.904568  |
| H | 0 | -0.914044 | -2.293453 | 1.664599  |

#### P-37+BU

##### B3LYP/6-31G(d) Geometry

|   |   |           |           |           |
|---|---|-----------|-----------|-----------|
| C | 0 | -1.399089 | -0.282695 | -1.851208 |
| C | 0 | -0.416543 | -1.134951 | 0.864211  |
| C | 0 | -0.528027 | -2.062037 | -0.317407 |
| C | 0 | -0.960626 | -1.684813 | -1.521924 |
| C | 0 | -1.684335 | 0.556227  | -0.562700 |
| C | 0 | -0.507160 | 0.356230  | 0.486670  |



|   |   |           |           |           |
|---|---|-----------|-----------|-----------|
| C | O | 0.773041  | 0.851952  | -0.148331 |
| O | O | 1.833036  | 0.238773  | -0.042467 |
| C | O | -2.950735 | 0.110406  | 0.054340  |
| C | O | -1.832485 | 1.979713  | -0.929475 |
| C | O | -0.718829 | 1.237760  | 1.743933  |
| N | O | -3.937553 | -0.249483 | 0.546605  |
| N | O | -1.908826 | 3.096399  | -1.235613 |
| H | O | -0.632635 | 0.242171  | -2.439903 |
| H | O | -2.302197 | -0.289137 | -2.471270 |
| H | O | 0.537682  | -1.299288 | 1.376390  |
| H | O | -1.201576 | -1.365533 | 1.597167  |
| H | O | -0.237806 | -3.096399 | -0.149687 |
| H | O | -1.006805 | -2.402590 | -2.337117 |
| H | O | 0.773569  | 1.821140  | -0.668575 |
| H | O | 0.074754  | 1.042181  | 2.471270  |
| H | O | -1.680177 | 0.992491  | 2.206481  |
| H | O | -0.714612 | 2.305872  | 1.504717  |
| B | O | 3.255129  | 0.782552  | -0.637790 |
| H | O | 3.575402  | -0.107916 | -1.386246 |
| H | O | 2.978486  | 1.839270  | -1.162198 |
| H | O | 3.937553  | 0.854110  | 0.354854  |

### P-38+BU

B3LYP/6-31G(d) Geometry

|   |   |           |           |           |
|---|---|-----------|-----------|-----------|
| C | O | 0.206484  | 1.878918  | -0.634412 |
| C | O | -0.206288 | 1.878939  | 0.634392  |
| C | O | -0.466754 | 0.624528  | 1.423194  |
| C | O | -0.576759 | -0.653334 | 0.544906  |
| C | O | 0.576764  | -0.653383 | -0.544901 |
| C | O | 0.466850  | 0.624479  | -1.423205 |
| C | O | 0.543780  | -1.907171 | -1.448147 |
| C | O | -0.543870 | -1.907117 | 1.448163  |
| C | O | 1.868014  | -0.632424 | 0.171284  |
| C | O | -1.868009 | -0.632295 | -0.171279 |
| N | O | 2.888277  | -0.638401 | 0.725756  |
| N | O | -2.888277 | -0.638241 | -0.725742 |
| H | O | 0.364507  | 2.821833  | -1.153757 |
| H | O | -0.364237 | 2.821871  | 1.153728  |
| H | O | -1.390661 | 0.726934  | 2.006022  |
| H | O | 0.337685  | 0.465678  | 2.155657  |
| H | O | -0.337605 | 0.465684  | -2.155661 |
| H | O | 1.390760  | 0.726810  | -2.006040 |
| H | O | -0.438432 | -1.997146 | -1.922539 |
| H | O | 0.750645  | -2.821871 | -0.887252 |
| H | O | 1.300096  | -1.817392 | -2.234081 |
| H | O | -1.300195 | -1.817283 | 2.234081  |
| H | O | 0.438328  | -1.997151 | 1.922573  |
| H | O | -0.750782 | -2.821809 | 0.887273  |

### P-39+BU

B3LYP/6-31G(d) Geometry

|   |   |           |           |           |
|---|---|-----------|-----------|-----------|
| C | O | 1.606734  | -1.002078 | -1.112984 |
| C | O | 2.145231  | -0.204841 | -0.187186 |
| C | O | 1.332134  | 0.681595  | 0.718063  |
| C | O | -0.142564 | 0.850252  | 0.257901  |
| C | O | -0.716298 | -0.563471 | -0.176318 |
| C | O | 0.125252  | -1.111368 | -1.365534 |
| C | O | -2.116378 | -0.412665 | -0.615731 |
| N | O | -3.225289 | -0.320655 | -0.947360 |
| C | O | -0.698755 | -1.577975 | 0.994383  |
| C | O | -0.158181 | 1.742097  | -0.921713 |
| N | O | -0.163922 | 2.462665  | -1.831908 |
| C | O | -0.978764 | 1.527623  | 1.366503  |

|   |   |           |           |           |
|---|---|-----------|-----------|-----------|
| H | O | 2.251869  | -1.605376 | -1.748497 |
| H | O | 3.225289  | -0.174017 | -0.058608 |
| H | O | 1.790449  | 1.676349  | 0.783018  |
| H | O | 1.335017  | 0.287433  | 1.744732  |
| H | O | -0.135691 | -0.569938 | -2.284489 |
| H | O | -0.155783 | -2.157235 | -1.540396 |
| H | O | -1.264177 | -1.217842 | 1.857184  |
| H | O | 0.327748  | -1.792367 | 1.301205  |
| H | O | -1.156328 | -2.515986 | 0.666488  |
| H | O | -0.566773 | 2.515986  | 1.591813  |
| H | O | -0.952916 | 0.933624  | 2.284489  |
| H | O | -2.019829 | 1.653577  | 1.056719  |

### P-40+BU

B3LYP/6-31G(d) Geometry

|   |   |           |           |           |
|---|---|-----------|-----------|-----------|
| C | O | 1.603267  | -1.557227 | -0.530117 |
| C | O | 2.137043  | -0.415102 | -0.089202 |
| C | O | 1.315736  | 0.775530  | 0.330336  |
| C | O | -0.158575 | 0.723776  | -0.142447 |
| C | O | -0.715036 | -0.735729 | 0.128476  |
| C | O | 0.120623  | -1.780854 | -0.671493 |
| C | O | -2.115564 | -0.822567 | -0.329442 |
| N | O | -3.219129 | -0.901098 | -0.683725 |
| C | O | -0.975837 | 1.789800  | 0.610817  |
| C | O | -0.695889 | -1.119190 | 1.631093  |
| C | O | -0.221334 | 1.046453  | -1.651704 |
| H | O | 2.250049  | -2.383129 | -0.821896 |
| H | O | 3.219129  | -0.322271 | -0.007626 |
| H | O | 1.358619  | 0.880659  | 1.425567  |
| H | O | 1.772150  | 1.695370  | -0.062001 |
| H | O | -0.161919 | -1.758014 | -1.732799 |
| H | O | -0.144899 | -2.786424 | -0.320465 |
| H | O | -0.576324 | 2.786424  | 0.389376  |
| H | O | -0.934948 | 1.656921  | 1.696766  |
| H | O | -2.027561 | 1.777454  | 0.304048  |
| H | O | -1.281137 | -0.424724 | 2.238131  |
| H | O | 0.331440  | -1.138888 | 2.004337  |
| H | O | -1.122365 | -2.118348 | 1.764860  |
| H | O | 0.446711  | 0.408861  | -2.238131 |
| H | O | 0.086438  | 2.085021  | -1.818509 |
| H | O | -1.238721 | 0.934399  | -2.041546 |

### P-41+BU

B3LYP/6-31G(d) Geometry

|   |   |           |           |           |
|---|---|-----------|-----------|-----------|
| C | O | -1.292349 | -1.167619 | -0.689336 |
| C | O | -1.805290 | 0.044446  | -0.924915 |
| C | O | -1.486630 | 1.236294  | -0.052154 |
| C | O | -0.044946 | 1.216028  | 0.482437  |
| C | O | 0.548514  | -0.214479 | 0.756996  |
| C | O | -0.345123 | -1.430652 | 0.456736  |
| C | O | 1.610719  | 0.078614  | -0.318717 |
| C | O | 1.072712  | 1.488870  | -0.577642 |
| O | O | 2.502256  | -0.580486 | -0.790900 |
| H | O | -1.569353 | -2.009776 | -1.320511 |
| H | O | -2.502256 | 0.188528  | -1.748406 |
| H | O | -2.185097 | 1.254276  | 0.799322  |
| H | O | -1.662373 | 2.171974  | -0.598286 |
| H | O | 0.038455  | 1.878654  | 1.348904  |
| H | O | 1.007684  | -0.316585 | 1.748406  |
| H | O | -0.918948 | -1.697613 | 1.357361  |
| H | O | 0.299126  | -2.291267 | 0.239035  |
| H | O | 1.777952  | 2.291267  | -0.332229 |
| H | O | 0.723726  | 1.637693  | -1.606774 |



**P-42+BU**

B3LYP/6-31G(d) Geometry

|     |           |           |           |
|-----|-----------|-----------|-----------|
| C O | -1.059431 | -1.158246 | -1.140259 |
| C O | -1.759582 | -0.131840 | -0.648000 |
| C O | -1.326761 | 0.596972  | 0.602132  |
| C O | 0.201529  | 0.693598  | 0.719678  |
| C O | 1.021293  | -0.561009 | 0.221664  |
| C O | 0.195081  | -1.667830 | -0.473201 |
| C O | 1.710404  | 0.376717  | -0.793529 |
| C O | 0.905718  | 1.596891  | -0.344607 |
| C O | 2.005152  | -1.155580 | 1.234012  |
| O O | 2.571419  | 0.191522  | -1.617250 |
| H O | -1.404682 | -1.679611 | -2.030971 |
| H O | -2.678187 | 0.187253  | -1.136646 |
| H O | -1.727124 | 0.074948  | 1.485702  |
| H O | -1.761067 | 1.604664  | 0.631518  |
| H O | 0.478579  | 0.976225  | 1.740783  |
| H O | -0.077045 | -2.428280 | 0.276594  |
| H O | 0.841805  | -2.177726 | -1.198142 |
| H O | 1.507436  | 2.428280  | 0.039658  |
| H O | 0.246995  | 1.981669  | -1.132853 |
| H O | 1.467750  | -1.684049 | 2.030971  |
| H O | 2.623057  | -0.379457 | 1.700673  |
| H O | 2.678187  | -1.867343 | 0.742563  |

**P-43+BU**

B3LYP/6-31G(d) Geometry

|     |           |           |           |
|-----|-----------|-----------|-----------|
| C O | -1.305718 | -1.899485 | -0.039562 |
| C O | -1.776214 | -0.885622 | -0.772487 |
| C O | -1.425399 | 0.552232  | -0.469828 |
| C O | 0.017734  | 0.745112  | 0.041561  |
| C O | 0.566439  | -0.477156 | 0.878967  |
| C O | -0.368604 | -1.674553 | 1.121962  |
| C O | 0.175259  | 2.096323  | 0.739723  |
| C O | 1.607852  | -0.705783 | -0.227706 |
| C O | 1.110132  | 0.478302  | -1.056085 |
| O O | 2.465936  | -1.538242 | -0.384738 |
| H O | -1.606329 | -2.921673 | -0.260570 |
| H O | -2.465936 | -1.079460 | -1.591789 |
| H O | -2.124507 | 0.934910  | 0.291491  |
| H O | -1.581260 | 1.182721  | -1.355055 |
| H O | 1.043363  | -0.171892 | 1.819890  |
| H O | -0.949331 | -1.509782 | 2.042558  |
| H O | 0.246747  | -2.564185 | 1.303671  |
| H O | -0.475838 | 2.165090  | 1.620065  |
| H O | -0.086985 | 2.921673  | 0.065534  |
| H O | 1.207552  | 2.256121  | 1.074626  |
| H O | 1.847952  | 1.278196  | -1.192320 |
| H O | 0.731736  | 0.184336  | -2.042558 |

**P-44+BU**

B3LYP/6-31G(d) Geometry

|     |           |           |           |
|-----|-----------|-----------|-----------|
| C O | 2.044668  | -1.276316 | 0.173153  |
| C O | 1.195111  | -1.770412 | -0.732283 |
| C O | -0.290319 | -1.505066 | -0.670140 |
| C O | -0.621004 | -0.070471 | -0.180908 |
| C O | 0.425078  | 0.528964  | 0.853027  |
| C O | 1.578686  | -0.381781 | 1.296197  |
| C O | -2.004372 | 0.002442  | 0.284433  |
| C O | 0.799848  | 1.569234  | -0.216751 |
| C O | -0.255358 | 1.070345  | -1.205259 |
| O O | 1.645103  | 2.423679  | -0.259721 |

|     |           |           |           |
|-----|-----------|-----------|-----------|
| N O | -3.103046 | 0.060996  | 0.658342  |
| H O | 3.103046  | -1.521231 | 0.121783  |
| H O | 1.554800  | -2.423679 | -1.523981 |
| H O | -0.760340 | -2.226474 | 0.013372  |
| H O | -0.761394 | -1.664238 | -1.646787 |
| H O | -0.057660 | 0.998880  | 1.717411  |
| H O | 1.263112  | -0.988021 | 2.158181  |
| H O | 2.396462  | 0.256850  | 1.650149  |
| H O | -1.057779 | 1.787598  | -1.405347 |
| H O | 0.152660  | 0.716495  | -2.158181 |

**P-45+BU**

B3LYP/6-31G(d) Geometry

|      |           |           |           |
|------|-----------|-----------|-----------|
| C O  | 0.952026  | -0.727407 | 1.213521  |
| C O  | 1.698850  | -0.373875 | 0.162997  |
| C O  | 1.130835  | -0.358434 | -1.236871 |
| C O  | -0.330386 | 0.115910  | -1.259297 |
| C O  | -1.202064 | -0.367583 | -0.046642 |
| C O  | -0.488364 | -1.160014 | 1.056315  |
| C O  | -1.464344 | 1.124308  | 0.294590  |
| C O  | -0.571733 | 1.605404  | -0.849315 |
| O O  | -2.110952 | 1.659628  | 1.152911  |
| Cl O | -2.743799 | -1.215233 | -0.523414 |
| H O  | 1.376569  | -0.745850 | 2.214603  |
| H O  | 2.743799  | -0.104229 | 0.299965  |
| H O  | 1.189750  | -1.368996 | -1.669369 |
| H O  | 1.729409  | 0.284807  | -1.893514 |
| H O  | -0.799109 | -0.128423 | -2.214603 |
| H O  | -0.528302 | -2.227749 | 0.798797  |
| H O  | -1.048946 | -1.040453 | 1.989649  |
| H O  | -1.086897 | 2.227749  | -1.588848 |
| H O  | 0.316113  | 2.141793  | -0.495143 |

**P-46+BU**

B3LYP/6-31G(d) Geometry

|     |           |           |           |
|-----|-----------|-----------|-----------|
| C O | -2.113801 | 0.896171  | 0.485332  |
| C O | -1.369764 | 1.768436  | -0.199693 |
| C O | 0.135173  | 1.669612  | -0.223613 |
| C O | 0.629572  | 0.199974  | -0.282779 |
| C O | -0.257460 | -0.848997 | 0.545721  |
| C O | -1.486774 | -0.240978 | 1.252951  |
| C O | 2.058616  | 0.153405  | 0.018883  |
| C O | -0.623259 | -1.493799 | -0.806728 |
| C O | 0.262612  | -0.550427 | -1.617813 |
| O O | -1.353003 | -2.406695 | -1.094442 |
| C O | 0.499396  | -1.806763 | 1.471073  |
| N O | 3.196013  | 0.126886  | 0.255823  |
| H O | -3.196013 | 0.999445  | 0.516571  |
| H O | -1.833711 | 2.594912  | -0.733001 |
| H O | 0.551227  | 2.145423  | 0.676130  |
| H O | 0.554762  | 2.216016  | -1.075978 |
| H O | -1.186496 | 0.103313  | 2.255082  |
| H O | -2.211410 | -1.048681 | 1.410054  |
| H O | 1.100919  | -1.042827 | -2.121018 |
| H O | -0.281422 | 0.058798  | -2.347513 |
| H O | 0.886399  | -1.275276 | 2.347513  |
| H O | 1.346271  | -2.284578 | 0.969040  |
| H O | -0.179959 | -2.594912 | 1.812916  |

**P-47+BU**

B3LYP/6-31G(d) Geometry

|     |           |           |           |
|-----|-----------|-----------|-----------|
| C O | -1.168972 | -1.864989 | 0.050904  |
| C O | -1.832115 | -0.811054 | -0.432498 |

|     |           |           |           |
|-----|-----------|-----------|-----------|
| C O | -1.329033 | 0.593696  | -0.213006 |
| C O | 0.208981  | 0.711308  | -0.272128 |
| C O | 0.989038  | -0.515226 | 0.391713  |
| C O | 0.096371  | -1.696096 | 0.852162  |
| C O | 1.605686  | -0.783036 | -0.994594 |
| C O | 0.807414  | 0.327323  | -1.671384 |
| C O | 2.039780  | -0.215958 | 1.467040  |
| O O | 2.436346  | -1.571745 | -1.374214 |
| C O | 0.639033  | 2.103919  | 0.196069  |
| H O | -1.547453 | -2.874162 | -0.098899 |
| H O | -2.761040 | -0.948049 | -0.982647 |
| H O | -1.676126 | 0.956957  | 0.768334  |
| H O | -1.764261 | 1.279113  | -0.952393 |
| H O | -0.164365 | -1.540078 | 1.911656  |
| H O | 0.701697  | -2.610588 | 0.822231  |
| H O | 1.414745  | 1.094873  | -2.165768 |
| H O | 0.080015  | -0.060861 | -2.394273 |
| H O | 1.566610  | 0.128788  | 2.394273  |
| H O | 2.761040  | 0.543418  | 1.150532  |
| H O | 2.603440  | -1.128375 | 1.691726  |
| H O | 0.391714  | 2.269146  | 1.251562  |
| H O | 0.121643  | 2.874162  | -0.389724 |
| H O | 1.714557  | 2.270363  | 0.073568  |

#### P-48+BU

B3LYP/6-31G(d) Geometry

|     |           |           |           |
|-----|-----------|-----------|-----------|
| C O | -2.067281 | -0.510842 | -0.812725 |
| C O | -2.230189 | 0.698655  | -0.270450 |
| C O | -1.196599 | 1.401707  | 0.568559  |
| C O | 0.127022  | 0.635252  | 0.675189  |
| C O | 0.071848  | -0.901371 | 0.523850  |
| C O | -0.811137 | -1.332047 | -0.666453 |
| C O | 1.559267  | -1.279064 | 0.304074  |
| C O | 1.203775  | 1.052186  | -0.336691 |
| C O | 2.123558  | -0.151053 | -0.584573 |
| O O | 1.309581  | 2.143432  | -0.852732 |
| H O | -2.865519 | -0.938385 | -1.417968 |
| H O | -3.164996 | 1.234780  | -0.429688 |
| H O | -1.612274 | 1.584791  | 1.569960  |
| H O | -0.984421 | 2.394909  | 0.148058  |
| H O | 0.588550  | 0.853755  | 1.653286  |
| H O | -0.324701 | -1.362148 | 1.435392  |
| H O | -1.066222 | -2.394909 | -0.555990 |
| H O | -0.237770 | -1.274292 | -1.606042 |
| H O | 1.673627  | -2.271909 | -0.143907 |
| H O | 2.081986  | -1.296369 | 1.268334  |
| H O | 3.164996  | 0.113306  | -0.372516 |
| H O | 2.077783  | -0.395054 | -1.653286 |

#### P-49+BU

B3LYP/6-31G(d) Geometry

|     |           |           |           |
|-----|-----------|-----------|-----------|
| C O | -1.408927 | -0.995874 | -1.255357 |
| C O | -2.062353 | -0.184262 | -0.420099 |
| C O | -1.391941 | 0.602536  | 0.674982  |
| C O | 0.141218  | 0.604945  | 0.581284  |
| C O | 0.759671  | -0.731259 | 0.093422  |
| C O | 0.083695  | -1.199024 | -1.234313 |
| C O | 2.188818  | -0.309651 | -0.288385 |
| C O | 0.751709  | 1.663639  | -0.368495 |
| C O | 2.209389  | 1.203828  | -0.550355 |
| O O | 3.143861  | -1.051702 | -0.371310 |
| C O | 0.745162  | -1.855660 | 1.130970  |
| H O | -1.960814 | -1.536805 | -2.023250 |

|     |           |           |           |
|-----|-----------|-----------|-----------|
| H O | -3.143861 | -0.085563 | -0.504048 |
| H O | -1.703595 | 0.192233  | 1.647934  |
| H O | -1.762402 | 1.638342  | 0.670493  |
| H O | 0.543654  | 0.802177  | 1.586272  |
| H O | 0.330782  | -2.256520 | -1.392408 |
| H O | 0.519939  | -0.677308 | -2.101173 |
| H O | 0.671460  | 2.675247  | 0.042946  |
| H O | 0.219289  | 1.662076  | -1.327264 |
| H O | 2.873584  | 1.655311  | 0.198965  |
| H O | 2.648036  | 1.424548  | -1.528969 |
| H O | -0.268312 | -2.246646 | 1.273823  |
| H O | 1.115593  | -1.503956 | 2.101173  |
| H O | 1.393254  | -2.675247 | 0.803979  |

#### P-50+BU

B3LYP/6-31G(d) Geometry

|     |           |           |           |
|-----|-----------|-----------|-----------|
| C O | -2.164579 | -0.600056 | 1.155004  |
| C O | -2.149860 | -1.564204 | 0.231231  |
| C O | -1.139647 | -1.650486 | -0.881120 |
| C O | -0.032974 | -0.595161 | -0.775179 |
| C O | -0.403139 | 0.762051  | -0.120801 |
| C O | -1.155115 | 0.518977  | 1.215258  |
| C O | 0.995869  | 1.378170  | 0.163627  |
| C O | 1.213958  | -1.045447 | -0.003689 |
| C O | 1.887925  | 0.197045  | 0.592439  |
| O O | 1.603151  | -2.186967 | 0.113965  |
| C O | -1.247956 | 1.645320  | -1.046719 |
| H O | -2.925187 | -0.615600 | 1.934469  |
| H O | -2.907148 | -2.346584 | 0.259262  |
| H O | -1.658012 | -1.563562 | -1.847159 |
| H O | -0.666970 | -2.642615 | -0.882862 |
| H O | 0.347640  | -0.375672 | -1.787959 |
| H O | -1.648379 | 1.452862  | 1.519390  |
| H O | -0.438186 | 0.301600  | 2.022649  |
| H O | 0.945967  | 2.173234  | 0.916064  |
| H O | 1.386394  | 1.830783  | -0.756948 |
| H O | 2.925187  | 0.269059  | 0.247899  |
| H O | 1.932535  | 0.070611  | 1.681175  |
| H O | -2.240202 | 1.211622  | -1.214626 |
| H O | -0.763124 | 1.771960  | -2.022649 |
| H O | -1.390065 | 2.642615  | -0.611686 |

#### P-51+BU

B3LYP/6-31G(d) Geometry

|     |           |           |           |
|-----|-----------|-----------|-----------|
| C O | 1.000814  | 1.231959  | 1.147732  |
| C O | 0.629883  | 1.907937  | 0.058310  |
| C O | -0.049522 | 1.291087  | -1.133905 |
| C O | -0.417282 | -0.180966 | -0.931770 |
| C O | 0.500166  | -1.011094 | 0.012527  |
| C O | 0.770439  | -0.244781 | 1.339207  |
| C O | -0.353628 | -2.293599 | 0.276960  |
| C O | -1.818146 | -0.440085 | -0.356162 |
| C O | -1.800282 | -1.777807 | 0.393909  |
| O O | -2.774251 | 0.289656  | -0.484049 |
| C O | 1.773537  | -1.338995 | -0.639588 |
| N O | 2.774251  | -1.611544 | -1.162709 |
| H O | 1.484925  | 1.755819  | 1.969549  |
| H O | 0.830326  | 2.976129  | -0.002020 |
| H O | 0.598487  | 1.400175  | -2.014381 |
| H O | -0.972879 | 1.839169  | -1.366099 |
| H O | -0.427680 | -0.688787 | -1.909422 |
| H O | 1.627907  | -0.704002 | 1.845757  |
| H O | -0.084563 | -0.398168 | 2.014381  |

H O -0.006880 -2.826281 1.167235  
H O -0.255364 -2.976129 -0.573655  
H O -2.543493 -2.459241 -0.032837  
H O -2.105649 -1.595256 1.431045

#### P-52+BU

B3LYP/6-31G(d) Geometry

C O 1.418235 -0.741148 1.171939  
C O 2.079280 -0.260540 0.116821  
C O 1.415253 0.149945 -1.170754  
C O -0.110675 0.267725 -1.066703  
C O -0.769290 -0.785494 -0.153543  
C O -0.078821 -0.890115 1.227848  
C O -2.192828 -0.226738 0.075001  
C O -0.657192 1.596153 -0.488137  
C O -2.132350 1.287417 -0.167520  
O O -3.164357 -0.860987 0.404782  
Cl O -0.813992 -2.419523 -0.947781  
H O 1.963035 -1.030809 2.068860  
H O 3.164357 -0.180031 0.155603  
H O 1.670528 -0.583475 -1.949467  
H O 1.830023 1.105988 -1.521138  
H O -0.541577 0.145297 -2.068860  
H O -0.370540 -1.841028 1.685664  
H O -0.490723 -0.114462 1.894387  
H O -0.540412 2.419523 -1.199625  
H O -0.106140 1.870355 0.419094  
H O -2.785796 1.503147 -1.023241  
H O -2.544972 1.832346 0.687432

#### P-53+BU

B3LYP/6-31G(d) Geometry

C O -1.707242 -1.246755 -0.216545  
C O -2.042963 0.043947 -0.248182  
C O -1.056199 1.170353 -0.113455  
C O 0.419363 0.716910 -0.238175  
C O 0.725664 -0.673519 0.424733  
C O -0.293177 -1.743014 -0.088068  
C O 2.065721 -1.060036 -0.231703  
C O 0.912157 0.509265 -1.706608  
C O 2.207494 -0.307635 -1.562674  
O O 2.858909 -1.853114 0.221760  
C O 1.270561 1.760534 0.366749  
C O 0.784428 -0.680369 1.952814  
N O 1.939164 2.595594 0.819880  
H O -2.479688 -2.007739 -0.316036  
H O -3.088008 0.329804 -0.353178  
H O -1.204975 1.667526 0.855420  
H O -1.252701 1.943212 -0.869315  
H O -0.247054 -2.595594 0.600394  
H O 0.022644 -2.153427 -1.060082  
H O 1.058130 1.463567 -2.219731  
H O 0.144831 -0.048270 -2.253506  
H O 3.088008 0.341960 -1.483763  
H O 2.399487 -1.004459 -2.384361  
H O -0.217113 -0.575860 2.384361  
H O 1.413542 0.128424 2.336490  
H O 1.214544 -1.627941 2.291428

#### P-54+BU

B3LYP/6-31G(d) Geometry

C O -1.443741 -1.542718 -0.768698  
C O -2.066299 -0.417074 -0.414632

C O -1.358411 0.778996 0.160176  
C O 0.180232 0.731565 0.065913  
C O 0.770034 -0.708180 0.259154  
C O 0.045621 -1.734120 -0.677701  
C O 2.176413 -0.565060 -0.342851  
C O 0.712036 1.108723 -1.350485  
C O 2.144166 0.542651 -1.407344  
O O 3.148309 -1.223085 -0.039761  
C O 0.796042 -1.249723 1.690442  
C O 0.760387 1.728874 1.090298  
H O -2.017030 -2.374819 -1.175723  
H O -3.148309 -0.344007 -0.516802  
H O -1.657801 0.889417 1.214537  
H O -1.717275 1.695736 -0.332391  
H O 0.280664 -2.743677 -0.318025  
H O 0.462975 -1.697791 -1.696561  
H O 0.678018 2.191670 -1.512358  
H O 0.081911 0.648901 -2.119858  
H O 2.905472 1.287067 -1.146433  
H O 2.430913 0.139473 -2.384696  
H O -0.218669 -1.448605 2.053432  
H O 1.281951 -0.558503 2.384696  
H O 1.363821 -2.185147 1.716887  
H O 0.438176 1.498113 2.110499  
H O 0.414880 2.743677 0.857665  
H O 1.856871 1.745393 1.086422

#### P-55+BU

B3LYP/6-31G(d) Geometry

C O 1.638098 0.668352 -0.921962  
C O 1.637887 -0.668564 -0.921989  
C O 1.061562 -1.430085 0.246887  
C O -0.243271 -0.771037 0.760708  
C O -0.243033 0.771350 0.760721  
C O 1.062010 1.430006 0.246947  
C O -1.414879 1.144729 -0.144041  
C O -1.415253 -1.144039 -0.144033  
O O -2.059054 0.000448 -0.590782  
O O -1.784153 -2.236341 -0.467303  
O O -1.783416 2.237148 -0.467330  
H O 2.059054 1.229364 -1.752639  
H O 2.058662 -1.229675 -1.752690  
H O 1.785695 -1.454697 1.074010  
H O 0.847030 -2.470877 -0.013261  
H O -0.476648 -1.174240 1.752676  
H O -0.476313 1.174606 1.752690  
H O 1.786144 1.454352 1.074075  
H O 0.847810 2.470877 -0.013160

#### P-56+BU

B3LYP/6-31G(d) Geometry

C O -1.249390 -1.486110 -0.898093  
C O -1.933644 -0.337554 -0.892709  
C O -1.711610 0.673074 0.206928  
C O -0.212757 0.798706 0.557515  
C O 0.530131 -0.555058 0.661140  
C O -0.272911 -1.802250 0.207460  
C O 1.781623 -0.378880 -0.204454  
C O 0.569945 1.558237 -0.544693  
O O 1.800165 0.852157 -0.776836  
O O 2.659636 -1.184993 -0.378575  
H O -1.406044 -2.225993 -1.679932  
H O -2.659636 -0.116457 -1.671962

|     |           |           |           |
|-----|-----------|-----------|-----------|
| H O | -2.265972 | 0.374675  | 1.109592  |
| H O | -2.107286 | 1.656843  | -0.075333 |
| H O | -0.112945 | 1.342954  | 1.502372  |
| H O | 0.890774  | -0.733451 | 1.679932  |
| H O | -0.824164 | -2.197597 | 1.073410  |
| H O | 0.436319  | -2.582091 | -0.087861 |
| H O | 0.825523  | 2.582091  | -0.258555 |
| H O | 0.017099  | 1.582888  | -1.489970 |

#### P-57+BU

B3LYP/6-31G(d) Geometry

|     |           |           |           |
|-----|-----------|-----------|-----------|
| C O | -2.032049 | -0.688333 | -0.987885 |
| C O | -2.445619 | 0.352734  | -0.261705 |
| C O | -1.590328 | 1.068952  | 0.750785  |
| C O | -0.111931 | 0.653830  | 0.703023  |
| C O | 0.071704  | -0.865639 | 0.422163  |
| C O | -0.650463 | -1.280689 | -0.875064 |
| C O | 2.394569  | -0.414422 | -0.569590 |
| C O | 0.714621  | 1.477251  | -0.291202 |
| C O | 2.190783  | 1.099854  | -0.355839 |
| O O | 0.246715  | 2.377816  | -0.961935 |
| C O | 1.565404  | -1.244392 | 0.423140  |
| H O | -2.704302 | -1.140299 | -1.715854 |
| H O | -3.458648 | 0.730480  | -0.393718 |
| H O | -1.661078 | 2.150562  | 0.584574  |
| H O | -1.990201 | 0.885473  | 1.759485  |
| H O | 0.346667  | 0.851700  | 1.685531  |
| H O | -0.419003 | -1.400254 | 1.247271  |
| H O | -0.062724 | -0.989402 | -1.759485 |
| H O | -0.708034 | -2.377816 | -0.914737 |
| H O | 2.116814  | -0.671040 | -1.599431 |
| H O | 3.458648  | -0.660751 | -0.470651 |
| H O | 2.646142  | 1.388992  | 0.603857  |
| H O | 2.667837  | 1.693217  | -1.141357 |
| H O | 1.966185  | -1.096302 | 1.436378  |
| H O | 1.676971  | -2.313595 | 0.199243  |

#### P-58+BU

B3LYP/6-31G(d) Geometry

|     |           |           |           |
|-----|-----------|-----------|-----------|
| C O | -2.444914 | 0.306076  | 0.221507  |
| C O | -1.877638 | -0.393238 | 1.207964  |
| C O | -0.428550 | -0.808919 | 1.214536  |
| C O | 0.255506  | -0.680220 | -0.180817 |
| C O | -0.168566 | 0.665496  | -0.860451 |
| C O | -1.701750 | 0.746039  | -1.013089 |
| C O | 1.928095  | 1.849373  | -0.044659 |
| C O | 1.785222  | -0.688004 | 0.026094  |
| C O | 2.414551  | 0.559572  | 0.639874  |
| O O | 2.470451  | -1.646465 | -0.281603 |
| C O | 0.398511  | 1.896485  | -0.128228 |
| C O | -0.142698 | -1.880963 | -1.055194 |
| H O | -3.500914 | 0.565597  | 0.283848  |
| H O | -2.469238 | -0.683166 | 2.075573  |
| H O | 0.102051  | -0.217297 | 1.974522  |
| H O | -0.340834 | -1.851306 | 1.550155  |
| H O | 0.267908  | 0.665484  | -1.870787 |
| H O | -2.029399 | 0.137345  | -1.869204 |
| H O | -1.984437 | 1.777065  | -1.268673 |
| H O | 2.314788  | 2.723735  | 0.492736  |
| H O | 2.346988  | 1.896730  | -1.059601 |
| H O | 2.147715  | 0.595676  | 1.705928  |
| H O | 3.500914  | 0.445308  | 0.582195  |
| H O | -0.034210 | 1.970601  | 0.878819  |

|     |           |           |           |
|-----|-----------|-----------|-----------|
| H O | 0.086550  | 2.803074  | -0.662976 |
| H O | -1.230404 | -1.987104 | -1.100811 |
| H O | 0.280752  | -2.803074 | -0.649323 |
| H O | 0.240520  | -1.769368 | -2.075573 |

#### P-59+BU

B3LYP/6-31G(d) Geometry

|     |           |           |           |
|-----|-----------|-----------|-----------|
| C O | 2.054711  | 0.279280  | 1.212515  |
| C O | 2.366495  | 1.136260  | 0.237303  |
| C O | 1.532431  | 1.330150  | -1.001744 |
| C O | 0.146099  | 0.673426  | -0.902633 |
| C O | 0.184878  | -0.731134 | -0.210469 |
| C O | 0.822132  | -0.589767 | 1.195198  |
| C O | -2.268694 | -0.370259 | 0.555732  |
| C O | -0.878546 | 1.594570  | -0.225940 |
| C O | -2.283345 | 1.019528  | -0.108116 |
| O O | -0.603809 | 2.712703  | 0.167561  |
| C O | -1.250308 | -1.303377 | -0.113849 |
| C O | 1.035471  | -1.700071 | -1.055934 |
| H O | 2.697061  | 0.200203  | 2.088542  |
| H O | 3.269931  | 1.739001  | 0.318103  |
| H O | 1.401444  | 2.402643  | -1.185672 |
| H O | 2.071592  | 0.932244  | -1.873997 |
| H O | -0.246395 | 0.510132  | -1.919939 |
| H O | 0.093860  | -0.179190 | 1.910893  |
| H O | 1.065900  | -1.592344 | 1.575985  |
| H O | -2.039347 | -0.256452 | 1.622374  |
| H O | -3.269931 | -0.815071 | 0.505900  |
| H O | -2.691620 | 0.926019  | -1.126091 |
| H O | -2.908025 | 1.732218  | 0.437952  |
| H O | -1.597772 | -1.533709 | -1.132125 |
| H O | -1.217634 | -2.261797 | 0.422094  |
| H O | 2.087481  | -1.401244 | -1.080533 |
| H O | 0.668309  | -1.749724 | -2.088542 |
| H O | 0.987887  | -2.712703 | -0.636632 |

#### P-60+BU

B3LYP/6-31G(d) Geometry

|     |           |           |           |
|-----|-----------|-----------|-----------|
| C O | 2.053085  | 1.015583  | 1.178290  |
| C O | 2.145135  | 1.785845  | 0.092523  |
| C O | 1.447386  | 1.493537  | -1.209254 |
| C O | 0.387529  | 0.389058  | -1.093625 |
| C O | 0.850203  | -0.790896 | -0.167926 |
| C O | 1.230934  | -0.246126 | 1.236470  |
| C O | -1.611508 | -1.336720 | 0.368994  |
| C O | -0.980108 | 0.913855  | -0.624217 |
| C O | -2.067054 | -0.143854 | -0.493840 |
| O O | -1.188604 | 2.091382  | -0.411087 |
| C O | -0.252644 | -1.885123 | -0.087115 |
| C O | 2.046576  | -1.406423 | -0.774768 |
| N O | 2.967787  | -1.915081 | -1.266291 |
| H O | 2.579785  | 1.293090  | 2.089098  |
| H O | 2.763235  | 2.681199  | 0.121021  |
| H O | 0.960868  | 2.404470  | -1.575485 |
| H O | 2.191642  | 1.208897  | -1.966104 |
| H O | 0.205233  | -0.043376 | -2.089098 |
| H O | 0.311747  | -0.058997 | 1.809261  |
| H O | 1.770086  | -1.028724 | 1.785377  |
| H O | -1.566489 | -1.028191 | 1.420202  |
| H O | -2.359173 | -2.136547 | 0.318729  |
| H O | -2.299786 | -0.503652 | -1.507593 |
| H O | -2.967787 | 0.330152  | -0.094192 |

H O -0.358273 -2.340909 -1.080051  
H O 0.082637 -2.681199 0.588095

#### P-61+BU

B3LYP/6-31G(d) Geometry

C O 2.459007 -0.453544 0.090021  
C O 1.941003 0.127728 1.173895  
C O 0.559662 0.725892 1.222351  
C O -0.091643 0.894179 -0.172252  
C O 0.212813 -0.316282 -1.099642  
C O 1.730602 -0.555536 -1.223833  
C O -2.051734 -1.346855 -0.563735  
C O -1.618211 1.101511 -0.004951  
C O -2.409609 -0.157808 0.344620  
O O -2.155992 2.179623 -0.120791  
C O -0.537781 -1.575302 -0.616815  
Cl O 0.614275 2.397374 -0.948122  
H O 3.470213 -0.855232 0.127509  
H O 2.519586 0.182436 2.094354  
H O -0.083630 0.090448 1.849278  
H O 0.576056 1.704486 1.715503  
H O -0.178060 -0.064716 -2.094354  
H O 2.161859 0.166957 -1.930054  
H O 1.897803 -1.545834 -1.669336  
H O -2.566566 -2.248147 -0.210593  
H O -2.424793 -1.150392 -1.578114  
H O -2.195447 -0.423224 1.389802  
H O -3.470213 0.102616 0.287926  
H O -0.162853 -1.886633 0.367366  
H O -0.310688 -2.397374 -1.306815

#### P-62+BU

B3LYP/6-31G(d) Geometry

C O 2.405996 0.143951 -0.365645  
C O 2.001155 -1.107155 -0.592107  
C O 0.589163 -1.580749 -0.373068  
C O -0.277130 -0.614350 0.493602  
C O -0.005956 0.877696 0.038260  
C O 1.505475 1.225273 0.165652  
C O -2.001821 0.819305 -1.570648  
C O -1.761986 -0.977186 0.242253  
C O -2.361918 -0.604011 -1.111874  
O O -2.410926 -1.585229 1.070407  
C O -0.505455 1.111240 -1.416151  
C O -0.749872 1.805627 0.914768  
C O 0.064127 -0.822971 1.977856  
N O -1.330630 2.558064 1.582648  
H O 3.443347 0.420811 -0.544814  
H O 2.706189 -1.843476 -0.974601  
H O 0.125305 -1.764603 -1.352385  
H O 0.596951 -2.558064 0.127074  
H O 1.753179 1.428872 1.216346  
H O 1.689747 2.168401 -0.365135  
H O -2.303152 0.959788 -2.615099  
H O -2.572736 1.545659 -0.979888  
H O -1.989772 -1.329541 -1.850132  
H O -3.443347 -0.750244 -1.041863  
H O 0.087752 0.480138 -2.087822  
H O -0.298445 2.150721 -1.695995  
H O 1.139199 -0.714420 2.149098  
H O -0.237875 -1.825995 2.287325

H O -0.468618 -0.111364 2.615099

#### P-63+BU

B3LYP/6-31G(d) Geometry

C O 2.428134 0.164533 -0.772015  
C O 1.875666 -0.741609 -1.581108  
C O 0.425984 -1.141795 -1.512658  
C O -0.278050 -0.727441 -0.180272  
C O 0.128094 0.751206 0.213076  
C O 1.669898 0.862596 0.324504  
C O -1.894594 1.684522 -1.093595  
C O -1.802993 -0.775505 -0.414373  
C O -2.394988 0.254620 -1.373849  
O O -2.512542 -1.600941 0.131919  
C O -0.375235 1.734230 -0.878237  
C O 0.098806 -1.752506 0.904111  
C O -0.479450 1.155596 1.574418  
H O 3.484388 0.409624 -0.875718  
H O 2.476687 -1.217639 -2.354918  
H O -0.091160 -0.722172 -2.386411  
H O 0.335203 -2.230624 -1.624781  
H O 2.002009 0.464583 1.295739  
H O 1.944513 1.927512 0.345173  
H O -2.177727 2.343604 -1.923227  
H O -2.407339 2.075256 -0.206408  
H O -2.116026 -0.032800 -2.397447  
H O -3.484388 0.180832 -1.307675  
H O 0.141883 1.529569 -1.823716  
H O -0.085195 2.753022 -0.588673  
H O 1.180636 -1.769472 1.067265  
H O -0.215924 -2.753022 0.594968  
H O -0.399880 -1.546982 1.853877  
H O -0.041741 0.583097 2.397447  
H O -1.563647 1.005948 1.615550  
H O -0.283106 2.216709 1.772562

#### P-64+BU

B3LYP/6-31G(d) Geometry

C O -1.535288 -1.209140 -0.204729  
C O -0.091441 -0.897110 0.232154  
O O -1.841844 -0.456817 -1.397463  
C O -2.617714 -0.682147 0.752857  
C O -2.064339 0.838463 -0.877390  
C O 0.053853 0.627304 0.538554  
O O -2.834824 0.667722 0.308358  
C O 0.896833 -1.377103 -0.850312  
C O -0.694537 1.445837 -0.519123  
C O 1.501277 1.091978 0.771228  
C O 2.270724 -0.776664 -0.719216  
O O -0.293728 2.473786 -1.022682  
C O 2.533197 0.318396 -0.003461  
H O -1.655955 -2.267640 -0.450763  
H O 0.118234 -1.445947 1.161118  
H O -2.305073 -0.679427 1.802809  
H O -3.552325 -1.246226 0.657677  
H O -2.603844 1.449891 -1.603769  
H O -0.516234 0.824359 1.457982  
H O 0.488659 -1.143257 -1.843689  
H O 0.962899 -2.473786 -0.807815  
H O 1.739242 1.034891 1.843689  
H O 1.563807 2.154730 0.505157  
H O 3.073641 -1.269666 -1.265073  
H O 3.552325 0.699780 0.040945



### P-65+BU

B3LYP/6-31G(d) Geometry

|   |   |           |           |           |
|---|---|-----------|-----------|-----------|
| C | O | -1.010536 | -1.267939 | -0.238878 |
| C | O | 0.265794  | -0.768673 | 0.468929  |
| O | O | -1.036195 | -0.819163 | -1.606028 |
| C | O | -2.326395 | -0.671340 | 0.284097  |
| C | O | -1.439914 | 0.521782  | -1.460596 |
| C | O | 0.503965  | 0.780968  | 0.276619  |
| O | O | -2.464941 | 0.543674  | -0.465259 |
| C | O | 1.495063  | -1.632928 | 0.037910  |
| C | O | -0.251635 | 1.342651  | -0.953034 |
| C | O | 2.011558  | 1.097519  | 0.064146  |
| C | O | 2.302754  | -1.037857 | -1.086790 |
| O | O | 0.045027  | 2.398175  | -1.475206 |
| C | O | 2.582209  | 0.266885  | -1.055851 |
| C | O | -0.003578 | 1.578255  | 1.504446  |
| H | O | -1.034269 | -2.360837 | -0.256227 |
| H | O | 0.112576  | -0.950570 | 1.541539  |
| H | O | -2.313125 | -0.447107 | 1.355091  |
| H | O | -3.175342 | -1.329825 | 0.064748  |
| H | O | -1.817419 | 0.910720  | -2.408815 |
| H | O | 1.161228  | -2.646631 | -0.210913 |
| H | O | 2.149460  | -1.743640 | 0.915753  |
| H | O | 2.541979  | 0.894824  | 1.007661  |
| H | O | 2.112995  | 2.165779  | -0.140497 |
| H | O | 2.664073  | -1.685690 | -1.881707 |
| H | O | 3.175342  | 0.746796  | -1.830068 |
| H | O | 0.522925  | 1.251293  | 2.408815  |
| H | O | -1.078398 | 1.452629  | 1.662991  |
| H | O | 0.188323  | 2.646631  | 1.361398  |

### P-66+BU

B3LYP/6-31G(d) Geometry

|   |   |           |           |           |
|---|---|-----------|-----------|-----------|
| C | O | 1.477178  | -0.965526 | 0.477605  |
| C | O | 0.025114  | -0.738438 | -0.016981 |
| O | O | 1.851926  | 0.087555  | 1.389886  |
| C | O | 2.574623  | -0.806662 | -0.590913 |
| C | O | 2.126475  | 1.156358  | 0.508257  |
| C | O | -0.043712 | 0.643464  | -0.756492 |
| O | O | 2.864162  | 0.601576  | -0.575265 |
| C | O | -0.904473 | -0.728715 | 1.225424  |
| C | O | 0.780921  | 1.697645  | -0.006479 |
| C | O | -1.470569 | 1.116311  | -1.081883 |
| C | O | -2.241347 | -0.078917 | 0.981368  |
| O | O | 0.446549  | 2.851589  | 0.161701  |
| C | O | -2.488955 | 0.745462  | -0.038595 |
| C | O | -0.402514 | -1.873160 | -0.965907 |
| H | O | 1.551551  | -1.908422 | 1.027177  |
| H | O | 2.265690  | -1.102996 | -1.597614 |
| H | O | 3.478585  | -1.362636 | -0.317323 |
| H | O | 2.707308  | 1.928103  | 1.017679  |
| H | O | 0.498145  | 0.524971  | -1.706823 |
| H | O | -0.400373 | -0.216840 | 2.055636  |
| H | O | -1.052279 | -1.765025 | 1.562847  |
| H | O | -1.783010 | 0.711221  | -2.055636 |
| H | O | -1.447753 | 2.206305  | -1.202019 |
| H | O | -3.025865 | -0.292417 | 1.705791  |
| H | O | -3.478585 | 1.186450  | -0.148165 |
| H | O | -0.269673 | -2.851589 | -0.487471 |
| H | O | 0.172275  | -1.872749 | -1.898897 |
| H | O | -1.461011 | -1.775276 | -1.225513 |

### P-67+BU

B3LYP/6-31G(d) Geometry

|   |   |           |           |           |
|---|---|-----------|-----------|-----------|
| C | O | -1.408737 | 1.018240  | 0.655472  |
| C | O | 0.032105  | 0.672547  | 0.157012  |
| O | O | -1.944606 | -0.130902 | 1.322671  |
| C | O | -2.438209 | 1.222924  | -0.466982 |
| C | O | -2.319833 | -0.961780 | 0.236796  |
| C | O | -0.037106 | -0.535186 | -0.850310 |
| O | O | -2.908262 | -0.110600 | -0.734975 |
| C | O | 0.919641  | 0.335499  | 1.388473  |
| C | O | -1.032876 | -1.584685 | -0.331852 |
| C | O | 1.336050  | -1.112235 | -1.225744 |
| C | O | 2.167006  | -0.430896 | 1.041660  |
| O | O | -0.859784 | -2.781962 | -0.387479 |
| C | O | 2.345771  | -1.075672 | -0.111979 |
| C | O | 0.580958  | 1.844300  | -0.544842 |
| N | O | 0.976566  | 2.781962  | -1.104832 |
| H | O | -1.375582 | 1.839468  | 1.374650  |
| H | O | -2.016209 | 1.659699  | -1.377004 |
| H | O | -3.277604 | 1.838659  | -0.127380 |
| H | O | -3.028158 | -1.721439 | 0.572844  |
| H | O | -0.512627 | -0.160592 | -1.766824 |
| H | O | 0.308457  | -0.241410 | 2.094075  |
| H | O | 1.178547  | 1.270381  | 1.901896  |
| H | O | 1.735938  | -0.570200 | -2.094075 |
| H | O | 1.184937  | -2.147790 | -1.553272 |
| H | O | 2.943386  | -0.454889 | 1.803562  |
| H | O | 3.277604  | -1.609001 | -0.289889 |

### P-68+BU

B3LYP/6-31G(d) Geometry

|    |   |           |           |           |
|----|---|-----------|-----------|-----------|
| C  | O | 1.380758  | -1.150460 | -0.770163 |
| C  | O | 0.024178  | -0.467545 | -1.068933 |
| O  | O | 1.460208  | -1.370710 | 0.655810  |
| C  | O | 2.668208  | -0.346077 | -1.002847 |
| C  | O | 1.846209  | -0.090100 | 1.118143  |
| C  | O | -0.134290 | 0.871799  | -0.289924 |
| O  | O | 2.843663  | 0.373259  | 0.230509  |
| C  | O | -1.076233 | -1.517399 | -0.712720 |
| C  | O | 0.586652  | 0.800123  | 1.084135  |
| C  | O | -1.574927 | 1.383637  | -0.168107 |
| C  | O | -2.358664 | -0.983750 | -0.145571 |
| Cl | O | 0.775466  | 2.230580  | -1.196280 |
| O  | O | 0.172124  | 1.360793  | 2.072876  |
| C  | O | -2.574779 | 0.301149  | 0.129738  |
| H  | O | 1.411217  | -2.130810 | -1.252996 |
| H  | O | -0.045527 | -0.232292 | -2.136831 |
| H  | O | 2.612195  | 0.357715  | -1.834479 |
| H  | O | 3.521922  | -1.018906 | -1.142670 |
| H  | O | 2.234492  | -0.157097 | 2.136831  |
| H  | O | -1.286626 | -2.103547 | -1.618951 |
| H  | O | -0.662812 | -2.230580 | 0.011480  |
| H  | O | -1.850831 | 1.884432  | -1.104531 |
| H  | O | -1.588718 | 2.150221  | 0.612718  |
| H  | O | -3.127375 | -1.723653 | 0.071682  |
| H  | O | -3.521922 | 0.618169  | 0.561091  |

### P-69+BU

B3LYP/6-31G(d) Geometry

|   |   |           |           |           |
|---|---|-----------|-----------|-----------|
| C | O | 1.366225  | 1.037452  | -1.062512 |
| C | O | -0.046716 | 0.700793  | -0.466314 |
| O | O | 1.812572  | -0.100896 | -1.811695 |
| C | O | 2.523367  | 1.203025  | -0.072880 |



|     |           |           |           |
|-----|-----------|-----------|-----------|
| C O | 2.260879  | -0.964215 | -0.783980 |
| C O | -0.007983 | -0.591820 | 0.468090  |
| O O | 2.977271  | -0.147672 | 0.132448  |
| C O | -0.971536 | 0.521407  | -1.719223 |
| C O | 1.009042  | -1.591603 | -0.133347 |
| C O | -1.403283 | -1.242627 | 0.658429  |
| C O | -2.228703 | -0.260658 | -1.488018 |
| O O | 0.877193  | -2.795575 | -0.082593 |
| C O | -2.404527 | -1.064595 | -0.442284 |
| C O | -0.520778 | 1.860955  | 0.302687  |
| C O | 0.514793  | -0.313143 | 1.913935  |
| N O | -0.867378 | 2.795575  | 0.899449  |
| H O | 1.273315  | 1.878095  | -1.753581 |
| H O | 2.233116  | 1.654432  | 0.878588  |
| H O | 3.334612  | 1.788087  | -0.518684 |
| H O | 2.909447  | -1.738404 | -1.198569 |
| H O | -0.378317 | 0.028320  | -2.498696 |
| H O | -1.211072 | 1.520070  | -2.106538 |
| H O | -1.845332 | -0.857187 | 1.588165  |
| H O | -1.229637 | -2.311434 | 0.834240  |
| H O | -3.000780 | -0.170670 | -2.249417 |
| H O | -3.334612 | -1.620027 | -0.335388 |
| H O | -0.081265 | 0.474008  | 2.385098  |
| H O | 1.568905  | -0.043700 | 1.956790  |
| H O | 0.390127  | -1.230381 | 2.498696  |

#### P-70+BU

B3LYP/6-31G(d) Geometry

|     |           |           |           |
|-----|-----------|-----------|-----------|
| C O | -1.454656 | -1.110125 | -0.783192 |
| C O | -0.035495 | -0.755470 | -0.248235 |
| O O | -1.778706 | -0.249017 | -1.896586 |
| C O | -2.660249 | -0.827863 | 0.123244  |
| C O | -2.134975 | 0.943104  | -1.234210 |
| C O | 0.047935  | 0.770633  | 0.198476  |
| O O | -2.959198 | 0.554783  | -0.138204 |
| C O | 0.907703  | -1.035594 | -1.461469 |
| C O | -0.832185 | 1.617182  | -0.752582 |
| C O | 1.501715  | 1.326338  | 0.242517  |
| C O | 2.269845  | -0.412824 | -1.377437 |
| O O | -0.565073 | 2.749358  | -1.100155 |
| C O | 2.521911  | 0.660399  | -0.631105 |
| C O | 0.347941  | -1.707621 | 0.899112  |
| C O | -0.531489 | 1.069345  | 1.619259  |
| H O | -1.452733 | -2.136475 | -1.161634 |
| H O | -2.467501 | -0.970351 | 1.189249  |
| H O | -3.520200 | -1.440884 | -0.169556 |
| H O | -2.683769 | 1.603419  | -1.909093 |
| H O | 0.420134  | -0.691332 | -2.382181 |
| H O | 1.001888  | -2.125540 | -1.569338 |
| H O | 1.865258  | 1.288928  | 1.279817  |
| H O | 1.441688  | 2.393793  | -0.005534 |
| H O | 3.053847  | -0.849445 | -1.993982 |
| H O | 3.520200  | 1.096029  | -0.618915 |
| H O | 0.307858  | -2.749358 | 0.558433  |
| H O | -0.313188 | -1.618293 | 1.766132  |
| H O | 1.371754  | -1.512891 | 1.235091  |
| H O | 0.013608  | 0.506274  | 2.382181  |
| H O | -1.597725 | 0.870073  | 1.715987  |
| H O | -0.383014 | 2.134480  | 1.829223  |

#### TS-1+DMB

B3LYP/6-31G(d) Geometry

|     |          |           |          |
|-----|----------|-----------|----------|
| C O | 0.520539 | -1.771156 | 0.210749 |
|-----|----------|-----------|----------|

|     |           |           |           |
|-----|-----------|-----------|-----------|
| C O | -0.501378 | 0.487789  | 1.540241  |
| C O | 0.449878  | 0.645702  | 0.557466  |
| C O | 0.990750  | -0.495322 | -0.107420 |
| C O | 0.748789  | 2.033695  | 0.030471  |
| C O | 1.856780  | -0.306370 | -1.330930 |
| H O | 0.932655  | -2.621708 | -0.328543 |
| H O | 0.246074  | -2.004602 | 1.234083  |
| H O | -1.005546 | 1.354704  | 1.957862  |
| H O | -0.609162 | -0.427324 | 2.106883  |
| H O | 0.306884  | 2.800661  | 0.671842  |
| H O | 0.343176  | 2.174642  | -0.979413 |
| H O | 1.828228  | 2.220664  | -0.020678 |
| H O | 1.352481  | 0.285234  | -2.106883 |
| H O | 2.140881  | -1.267433 | -1.768993 |
| H O | 2.781522  | 0.230876  | -1.082986 |
| C O | -1.464818 | -1.813241 | -0.380783 |
| C O | -2.201403 | -0.750534 | 0.158989  |
| C O | -2.516700 | 0.392096  | -0.628248 |
| N O | -2.768594 | 1.317290  | -1.294000 |
| H O | -1.632279 | -2.800661 | 0.040751  |
| H O | -1.269120 | -1.808614 | -1.448101 |
| H O | -2.781522 | -0.884807 | 1.065946  |

#### TS-2+DMB

B3LYP/6-31G(d) Geometry

|     |           |           |           |
|-----|-----------|-----------|-----------|
| C O | 0.971486  | -1.628792 | 0.500959  |
| C O | -0.356947 | 0.733414  | 1.290008  |
| C O | 0.723160  | 0.804713  | 0.440445  |
| C O | 1.422431  | -0.381315 | 0.062104  |
| C O | 1.047312  | 2.117900  | -0.242917 |
| C O | 2.466349  | -0.315837 | -1.028623 |
| H O | 1.515608  | -2.512716 | 0.174398  |
| H O | 0.539719  | -1.732741 | 1.490706  |
| H O | -0.978868 | 1.604983  | 1.470562  |
| H O | -0.503308 | -0.088712 | 1.976907  |
| H O | 0.382543  | 2.914005  | 0.102723  |
| H O | 0.952855  | 2.052413  | -1.334197 |
| H O | 2.077827  | 2.431264  | -0.032284 |
| H O | 2.053668  | 0.056933  | -1.976907 |
| H O | 2.906084  | -1.299041 | -1.218168 |
| H O | 3.281836  | 0.366703  | -0.757634 |
| C O | -0.870300 | -1.892028 | -0.394596 |
| C O | -1.810744 | -0.965316 | 0.064255  |
| C O | -2.282846 | 0.133911  | -0.771128 |
| O O | -3.281836 | 0.806819  | -0.563713 |
| H O | -0.935430 | -2.914005 | -0.030102 |
| H O | -0.544927 | -1.814905 | -1.429863 |
| H O | -2.400300 | -1.173703 | 0.954035  |
| H O | -1.656022 | 0.312201  | -1.678164 |

#### TS-3+DMB

B3LYP/6-31G(d) Geometry

|     |           |           |           |
|-----|-----------|-----------|-----------|
| C O | 2.419630  | -1.282563 | 0.454882  |
| C O | 0.591571  | 0.732828  | 1.347400  |
| C O | 1.588564  | 1.044713  | 0.462453  |
| C O | 2.539836  | 0.052316  | 0.046041  |
| C O | 1.602183  | 2.412001  | -0.190682 |
| C O | 3.532891  | 0.393702  | -1.036892 |
| H O | 3.200673  | -1.970890 | 0.139570  |
| H O | 2.018132  | -1.514645 | 1.435355  |
| H O | -0.209869 | 1.435793  | 1.554750  |
| H O | 0.604253  | -0.158352 | 1.960429  |
| H O | 0.780775  | 3.029425  | 0.179952  |

|     |           |           |           |
|-----|-----------|-----------|-----------|
| H O | 1.504563  | 2.349214  | -1.281208 |
| H O | 2.541128  | 2.940483  | 0.016648  |
| H O | 3.038424  | 0.724922  | -1.960429 |
| H O | 4.171073  | -0.459874 | -1.279818 |
| H O | 4.183250  | 1.220876  | -0.724721 |
| C O | 0.830339  | -1.997211 | -0.542878 |
| C O | -0.372390 | -1.559543 | 0.032204  |
| C O | -1.144863 | -0.499438 | -0.508466 |
| O O | -2.279079 | -0.185583 | -0.063412 |
| B O | -3.041797 | 1.106621  | -0.574167 |
| H O | 1.120689  | -3.029425 | -0.362002 |
| H O | 1.070734  | -1.651636 | -1.545407 |
| H O | -0.781888 | -2.072255 | 0.899373  |
| H O | -0.758606 | 0.056560  | -1.372956 |
| H O | -2.947938 | 1.886711  | 0.358268  |
| H O | -2.450893 | 1.483457  | -1.573421 |
| H O | -4.183250 | 0.758112  | -0.772903 |

#### TS-4+DMB

B3LYP/6-31G(d) Geometry

|     |           |           |           |
|-----|-----------|-----------|-----------|
| C O | -0.733747 | -0.780115 | 0.523206  |
| C O | -1.333536 | 0.365112  | -0.101682 |
| C O | -1.008309 | 1.653729  | 0.330519  |
| C O | 0.136854  | -0.622441 | 1.568200  |
| C O | -0.915694 | -2.149006 | -0.097112 |
| C O | -2.130785 | 0.187763  | -1.369531 |
| H O | -1.502944 | 2.493488  | -0.152788 |
| H O | -0.790298 | 1.828322  | 1.378837  |
| H O | 0.695069  | -1.470694 | 1.953781  |
| H O | 0.194091  | 0.281009  | 2.160602  |
| H O | -0.488719 | -2.179581 | -1.105833 |
| H O | -1.976287 | -2.417418 | -0.174983 |
| H O | -0.420432 | -2.917995 | 0.501647  |
| H O | -2.991723 | -0.473000 | -1.205180 |
| H O | -1.523477 | -0.268141 | -2.160602 |
| H O | -2.510828 | 1.144708  | -1.737726 |
| C O | 1.772930  | 0.946236  | 0.210661  |
| C O | 0.925081  | 1.958058  | -0.225990 |
| N O | 2.054758  | -0.147030 | -0.656633 |
| O O | 1.335551  | -0.291824 | -1.665536 |
| O O | 2.991723  | -0.901594 | -0.362359 |
| H O | 2.415749  | 0.984515  | 1.077290  |
| H O | 1.018472  | 2.917995  | 0.274737  |
| H O | 0.724791  | 2.000501  | -1.290199 |

#### TS-5+DMB

B3LYP/6-31G(d) Geometry

|     |           |           |           |
|-----|-----------|-----------|-----------|
| C O | -1.056431 | -0.786886 | 0.515265  |
| C O | -1.717194 | 0.294899  | -0.136703 |
| C O | -1.512439 | 1.595900  | 0.300657  |
| C O | -0.201285 | -0.531898 | 1.571339  |
| C O | -1.091729 | -2.171544 | -0.096074 |
| C O | -2.409573 | 0.056161  | -1.460272 |
| H O | -1.963081 | 2.418756  | -0.249597 |
| H O | -1.337089 | 1.808940  | 1.348324  |
| H O | 0.384569  | -1.338888 | 2.000817  |
| H O | -0.337699 | 0.323783  | 2.219962  |
| H O | -0.684957 | -2.177957 | -1.114277 |
| H O | -2.118114 | -2.555291 | -0.154382 |
| H O | -0.507000 | -2.877631 | 0.499858  |
| H O | -3.207983 | -0.690490 | -1.366351 |
| H O | -1.711753 | -0.321535 | -2.219962 |
| H O | -2.860144 | 0.976089  | -1.843974 |

|     |          |           |           |
|-----|----------|-----------|-----------|
| C O | 0.646414 | 1.928800  | -0.003741 |
| C O | 1.369069 | 0.882660  | 0.553114  |
| C O | 2.029571 | -0.111608 | -0.345000 |
| F O | 1.261555 | -0.412984 | -1.423885 |
| F O | 2.333593 | -1.277978 | 0.273879  |
| F O | 3.207983 | 0.359837  | -0.837864 |
| H O | 0.603087 | 2.877631  | 0.520836  |
| H O | 0.541147 | 1.989568  | -1.080778 |
| H O | 1.870734 | 1.006537  | 1.507343  |

#### TS-6+DMB

B3LYP/6-31G(d) Geometry

|     |           |           |           |
|-----|-----------|-----------|-----------|
| C O | 1.208517  | -0.931729 | -0.880000 |
| C O | 2.068297  | 0.107538  | -0.423892 |
| C O | 1.810560  | 1.440530  | -0.756174 |
| C O | 0.111086  | -0.650977 | -1.672539 |
| C O | 1.404099  | -2.342503 | -0.363710 |
| C O | 3.122771  | -0.199628 | 0.616839  |
| H O | 2.495441  | 2.199572  | -0.384195 |
| H O | 1.375807  | 1.687998  | -1.718058 |
| H O | -0.567950 | -1.446734 | -1.963843 |
| H O | 0.051520  | 0.242031  | -2.278784 |
| H O | 1.337714  | -2.396429 | 0.729750  |
| H O | 2.391523  | -2.731738 | -0.643284 |
| H O | 0.652494  | -3.020334 | -0.777711 |
| H O | 3.847408  | -0.935783 | 0.245140  |
| H O | 2.692252  | -0.623629 | 1.534503  |
| H O | 3.680271  | 0.699969  | 0.893196  |
| C O | 0.060743  | 1.965746  | 0.245603  |
| C O | -1.007487 | 1.285363  | -0.343087 |
| B O | -1.652367 | -0.027469 | 0.135826  |
| C O | -2.976638 | -0.559046 | -0.578569 |
| C O | -1.207720 | -0.738142 | 1.491637  |
| H O | 0.209638  | 3.020334  | 0.016088  |
| H O | 0.380390  | 1.687623  | 1.246663  |
| H O | -1.416924 | 1.760700  | -1.240393 |
| H O | -3.162563 | -0.126205 | -1.570090 |
| H O | -3.847408 | -0.303988 | 0.046338  |
| H O | -2.998619 | -1.653205 | -0.675954 |
| H O | -1.931691 | -0.473614 | 2.278784  |
| H O | -0.217930 | -0.453492 | 1.869042  |
| H O | -1.238209 | -1.833530 | 1.420862  |

#### TS-7+DMB

B3LYP/6-31G(d) Geometry

|     |           |           |           |
|-----|-----------|-----------|-----------|
| C O | 0.938022  | -0.911541 | -0.655332 |
| C O | 1.802400  | 0.015789  | 0.007406  |
| C O | 1.643700  | 1.394238  | -0.163648 |
| C O | -0.063780 | -0.469244 | -1.486358 |
| C O | 1.023453  | -2.384992 | -0.316003 |
| C O | 2.743351  | -0.485059 | 1.077469  |
| H O | 2.352026  | 2.048759  | 0.339417  |
| H O | 1.296309  | 1.785923  | -1.113513 |
| H O | -0.778957 | -1.168340 | -1.909028 |
| H O | -0.070151 | 0.518974  | -1.924126 |
| H O | 0.830720  | -2.568868 | 0.747451  |
| H O | 2.019112  | -2.786864 | -0.541746 |
| H O | 0.294060  | -2.961583 | -0.890903 |
| H O | 3.462414  | -1.205690 | 0.666875  |
| H O | 2.207123  | -1.002907 | 1.883351  |
| H O | 3.313123  | 0.335556  | 1.521920  |
| C O | -0.085253 | 1.900868  | 0.810603  |
| C O | -1.196859 | 1.386974  | 0.132492  |

|      |           |           |           |
|------|-----------|-----------|-----------|
| B O  | -1.950980 | 0.132689  | 0.499397  |
| Cl O | -3.462414 | -0.323683 | -0.349359 |
| Cl O | -1.502180 | -0.865728 | 1.924126  |
| H O  | 0.136260  | 2.961583  | 0.705668  |
| H O  | 0.159404  | 1.493475  | 1.787583  |
| H O  | -1.569883 | 1.968418  | -0.711154 |

#### TS-8+DMB

B3LYP/6-31G(d) Geometry

|      |           |           |           |
|------|-----------|-----------|-----------|
| C O  | -0.222686 | -1.723654 | -0.403409 |
| C O  | 0.304296  | 0.920544  | -1.327708 |
| C O  | -0.880499 | 0.631050  | -0.704229 |
| C O  | -1.177525 | -0.705386 | -0.277154 |
| C O  | -1.825575 | 1.758036  | -0.337182 |
| C O  | -2.418272 | -0.962427 | 0.543207  |
| H O  | -0.520152 | -2.720975 | -0.085178 |
| H O  | 0.451003  | -1.736016 | -1.255736 |
| H O  | 0.584504  | 1.948944  | -1.535592 |
| H O  | 0.940716  | 0.168815  | -1.772422 |
| H O  | -1.434936 | 2.720975  | -0.676410 |
| H O  | -1.991362 | 1.824765  | 0.745236  |
| H O  | -2.810278 | 1.617512  | -0.800562 |
| H O  | -2.425147 | -0.382750 | 1.477499  |
| H O  | -2.513087 | -2.020152 | 0.803154  |
| H O  | -3.323042 | -0.670203 | -0.004947 |
| C O  | 1.221211  | -1.283533 | 0.893015  |
| C O  | 2.081263  | -0.297250 | 0.399671  |
| C O  | 2.138043  | 1.067639  | 0.911028  |
| O O  | 2.988303  | 1.905941  | 0.663614  |
| Cl O | 3.323042  | -0.778099 | -0.747847 |
| H O  | 1.592000  | -2.304539 | 0.912862  |
| H O  | 0.643468  | -1.008304 | 1.772422  |
| H O  | 1.309285  | 1.272940  | 1.626324  |

#### TS-9+DMB

B3LYP/6-31G(d) Geometry

|     |           |           |           |
|-----|-----------|-----------|-----------|
| C O | 1.534393  | -0.672831 | 0.111602  |
| C O | 1.075337  | 0.619848  | 0.513897  |
| C O | -0.097396 | 0.759720  | 1.214521  |
| C O | 0.745018  | -1.804835 | 0.348539  |
| C O | 2.724728  | -0.786777 | -0.811595 |
| C O | 1.800935  | 1.856569  | 0.022721  |
| H O | -0.514361 | 1.743767  | 1.406674  |
| H O | -0.548561 | -0.050761 | 1.769242  |
| H O | 1.139106  | -2.766202 | 0.024468  |
| H O | 0.157670  | -1.875212 | 1.259445  |
| H O | 3.620878  | -0.337488 | -0.364780 |
| H O | 2.561726  | -0.265003 | -1.765839 |
| H O | 2.954810  | -1.831828 | -1.037421 |
| H O | 1.856376  | 1.897380  | -1.072400 |
| H O | 2.833546  | 1.884069  | 0.393389  |
| H O | 1.301369  | 2.766202  | 0.366503  |
| C O | -1.781305 | -0.644505 | -0.316581 |
| C O | -0.887535 | -1.600221 | -0.821732 |
| C O | -1.914764 | 0.646891  | -0.991029 |
| O O | -2.817637 | 1.453130  | -0.803416 |
| C O | -2.802162 | -0.999961 | 0.733109  |
| H O | -0.398854 | -1.383358 | -1.769242 |
| H O | -1.154435 | -2.648970 | -0.703049 |
| H O | -1.128384 | 0.844379  | -1.755761 |
| H O | -3.245079 | -0.094545 | 1.155667  |
| H O | -3.620878 | -1.593338 | 0.303038  |
| H O | -2.365682 | -1.600630 | 1.542275  |

#### TS-10+DMB

B3LYP/6-31G(d) Geometry

|     |           |           |           |
|-----|-----------|-----------|-----------|
| C O | 1.344055  | -0.621432 | 0.023697  |
| C O | 1.327982  | 0.725723  | 0.484640  |
| C O | 0.323955  | 1.152309  | 1.329468  |
| C O | 0.314479  | -1.492764 | 0.385601  |
| C O | 2.306805  | -1.025821 | -1.069460 |
| C O | 2.279927  | 1.741310  | -0.113940 |
| H O | 0.213085  | 2.206155  | 1.567187  |
| H O | -0.205310 | 0.475409  | 1.986726  |
| H O | 0.340940  | -2.505401 | -0.011063 |
| H O | -0.128580 | -1.430659 | 1.373957  |
| H O | 3.348007  | -0.869633 | -0.760074 |
| H O | 2.164697  | -0.436783 | -1.986726 |
| H O | 2.192903  | -2.082200 | -1.328618 |
| H O | 2.198257  | 1.794863  | -1.207004 |
| H O | 3.323564  | 1.488400  | 0.113456  |
| H O | 2.087912  | 2.741363  | 0.283981  |
| C O | -1.686349 | 0.560979  | 0.023616  |
| C O | -1.454328 | -0.739826 | -0.453057 |
| C O | -1.452328 | 1.740635  | -0.803074 |
| O O | -1.928333 | 2.849858  | -0.611320 |
| C O | -2.395967 | -1.858062 | -0.039088 |
| H O | -2.340675 | 0.710679  | 0.880779  |
| H O | -1.101260 | -0.806232 | -1.482000 |
| H O | -0.793757 | 1.552175  | -1.685194 |
| H O | -3.348007 | -1.767625 | -0.577568 |
| H O | -1.987472 | -2.849858 | -0.257687 |
| H O | -2.622523 | -1.811549 | 1.032245  |

#### TS-11+DMB

B3LYP/6-31G(d) Geometry

|     |           |           |           |
|-----|-----------|-----------|-----------|
| C O | 1.089559  | -1.501797 | -0.018825 |
| C O | 1.562854  | -0.281406 | 0.534135  |
| C O | 0.714392  | 0.491359  | 1.322459  |
| C O | -0.211265 | -1.918328 | 0.240084  |
| C O | 1.904786  | -2.217172 | -1.073933 |
| C O | 2.890587  | 0.289163  | 0.085979  |
| H O | 1.035054  | 1.474349  | 1.655757  |
| H O | -0.043829 | 0.031009  | 1.944693  |
| H O | -0.605563 | -2.796457 | -0.264560 |
| H O | -0.696753 | -1.695239 | 1.181609  |
| H O | 2.880523  | -2.523770 | -0.677006 |
| H O | 2.108304  | -1.579345 | -1.944693 |
| H O | 1.393444  | -3.116717 | -1.426746 |
| H O | 2.951502  | 0.400034  | -1.004322 |
| H O | 3.717751  | -0.369368 | 0.380661  |
| H O | 3.071713  | 1.269794  | 0.533509  |
| C O | -1.009165 | 0.977463  | -0.020771 |
| C O | -1.452339 | -0.228297 | -0.601835 |
| C O | -0.236926 | 1.933673  | -0.834240 |
| O O | -0.110706 | 3.116717  | -0.583438 |
| C O | -2.707091 | -0.790381 | -0.208497 |
| N O | -3.717751 | -1.262219 | 0.127494  |
| H O | -1.581021 | 1.413974  | 0.793239  |
| H O | -1.152725 | -0.447391 | -1.623480 |
| H O | 0.244000  | 1.484083  | -1.734338 |

#### TS-12+DMB

B3LYP/6-31G(d) Geometry

|     |           |           |           |
|-----|-----------|-----------|-----------|
| C O | -1.152121 | -1.981231 | -0.327964 |
| C O | -0.129340 | 0.463197  | -1.464773 |

|      |           |           |           |
|------|-----------|-----------|-----------|
| C O  | -1.303609 | 0.455836  | -0.767660 |
| C O  | -1.844162 | -0.770662 | -0.231835 |
| C O  | -1.990133 | 1.769444  | -0.453047 |
| C O  | -3.078694 | -0.707366 | 0.631879  |
| H O  | -1.653457 | -2.871212 | 0.045164  |
| H O  | -0.494112 | -2.176772 | -1.169115 |
| H O  | 0.337052  | 1.398293  | -1.761284 |
| H O  | 0.351263  | -0.435861 | -1.827887 |
| H O  | -1.439691 | 2.607919  | -0.885623 |
| H O  | -2.069425 | 1.945096  | 0.626661  |
| H O  | -3.010072 | 1.791338  | -0.856538 |
| H O  | -2.937409 | -0.051279 | 1.501623  |
| H O  | -3.367152 | -1.697273 | 0.994207  |
| H O  | -3.926524 | -0.292819 | 0.071832  |
| C O  | 0.380771  | -1.819493 | 0.994050  |
| C O  | 1.450014  | -1.130789 | 0.414126  |
| C O  | 1.705816  | 0.246509  | 0.658315  |
| O O  | 2.676859  | 0.885330  | 0.189746  |
| B O  | 2.769993  | 2.465481  | 0.373838  |
| Cl O | 2.501314  | -1.990378 | -0.692441 |
| H O  | 0.469387  | -2.896845 | -1.094305 |
| H O  | -0.116300 | -1.331908 | 1.827887  |
| H O  | 1.019121  | 0.759737  | 1.342375  |
| H O  | 2.433075  | 2.896845  | -0.715419 |
| H O  | 1.983788  | 2.748822  | 1.262663  |
| H O  | 3.926524  | 2.697342  | 0.632903  |

#### TS-13+DMB

B3LYP/6-31G(d) Geometry

|     |           |           |           |
|-----|-----------|-----------|-----------|
| C O | 1.787430  | -1.618347 | 0.262032  |
| C O | 0.313316  | 0.580024  | 1.371044  |
| C O | 1.424528  | 0.803317  | 0.604070  |
| C O | 2.198444  | -0.291517 | 0.085454  |
| C O | 1.761366  | 2.219723  | 0.184254  |
| C O | 3.332933  | -0.003112 | -0.866314 |
| H O | 2.446115  | -2.396006 | -0.118219 |
| H O | 1.261639  | -1.910051 | 1.165761  |
| H O | -0.345601 | 1.397502  | 1.648691  |
| H O | 0.095470  | -0.375637 | 1.829357  |
| H O | 1.046207  | 2.930368  | 0.604711  |
| H O | 1.747541  | 2.340766  | -0.905702 |
| H O | 2.763848  | 2.506754  | 0.525622  |
| H O | 2.994494  | 0.547524  | -1.754964 |
| H O | 3.818324  | -0.923254 | -1.201928 |
| H O | 4.096296  | 0.624962  | -0.389681 |
| C O | 0.176075  | -1.848316 | -0.930719 |
| C O | -0.978198 | -1.334372 | -0.315066 |
| C O | -1.450148 | -0.043919 | -0.692112 |
| O O | -2.532361 | 0.444111  | -0.269077 |
| B O | -2.915502 | 1.956976  | -0.554728 |
| C O | -1.757698 | -2.144182 | 0.689576  |
| H O | 0.289428  | -2.930368 | -0.952152 |
| H O | 0.540322  | -1.357858 | -1.829357 |
| H O | -0.872397 | 0.541355  | -1.417288 |
| H O | -2.668900 | 2.522658  | 0.498354  |
| H O | -2.198551 | 2.327609  | -1.470140 |
| H O | -4.096296 | 1.955635  | -0.816074 |
| H O | -1.092402 | -2.738486 | 1.328940  |
| H O | -2.432349 | -2.849430 | 0.186189  |
| H O | -2.374834 | -1.499050 | 1.319404  |

#### TS-14+DMB

B3LYP/6-31G(d) Geometry

|     |           |           |           |
|-----|-----------|-----------|-----------|
| C O | -2.677821 | 0.393583  | 0.465505  |
| C O | -0.387234 | -1.050929 | 1.356208  |
| C O | -1.251749 | -1.620383 | 0.455371  |
| C O | -2.430055 | -0.922414 | 0.040119  |
| C O | -0.870801 | -2.923262 | -0.217470 |
| C O | -3.277480 | -1.501588 | -1.065315 |
| H O | -3.622028 | 0.834110  | 0.154132  |
| H O | -2.380920 | 0.697269  | 1.463998  |
| H O | 0.583403  | -1.496467 | 1.553492  |
| H O | -0.663534 | -0.224662 | 1.997496  |
| H O | 0.098488  | -3.278424 | 0.139893  |
| H O | -0.804289 | -2.821021 | -1.307205 |
| H O | -1.613989 | -3.704345 | -0.013197 |
| H O | -2.707437 | -1.621830 | -1.997496 |
| H O | -4.145627 | -0.872501 | -1.278170 |
| H O | -3.642093 | -2.501502 | -0.799151 |
| C O | -1.370327 | 1.582118  | -0.464122 |
| C O | -0.083573 | 1.381599  | 0.085586  |
| C O | 0.894260  | 0.546059  | -0.504598 |
| O O | 2.086869  | 0.487775  | -0.100723 |
| B O | 3.069085  | -0.636331 | -0.630187 |
| C O | -2.034699 | 2.933489  | -0.235876 |
| H O | -1.507442 | 1.194007  | -1.473215 |
| H O | 0.223741  | 1.956849  | 0.957233  |
| H O | 0.619204  | -0.062397 | -1.376287 |
| H O | 3.068765  | -1.466179 | 0.266539  |
| H O | 2.582210  | -1.064905 | -1.664737 |
| H O | 4.145627  | -0.103699 | -0.769444 |
| H O | -1.500964 | 3.704345  | -0.804349 |
| H O | -2.002027 | 3.221082  | 0.820680  |
| H O | -3.078423 | 2.941658  | -0.562983 |

#### TS-15+DMB

B3LYP/6-31G(d) Geometry

|     |           |           |           |
|-----|-----------|-----------|-----------|
| C O | 2.378179  | 0.101016  | 0.264591  |
| C O | -0.177008 | -0.018541 | 1.449575  |
| C O | 0.104359  | 0.976504  | 0.534185  |
| C O | 1.403053  | 1.063564  | -0.043950 |
| C O | -1.018444 | 1.850926  | 0.017397  |
| C O | 1.652579  | 2.028421  | -1.176798 |
| H O | 3.350989  | 0.190060  | -0.212616 |
| H O | 2.432564  | -0.314340 | 1.264963  |
| H O | -1.196911 | -0.192310 | 1.779575  |
| H O | 0.590848  | -0.505153 | 2.036449  |
| H O | -1.970063 | 1.585407  | 0.483389  |
| H O | -1.144873 | 1.764082  | -1.068315 |
| H O | -0.819313 | 2.908179  | 0.232842  |
| H O | 0.997033  | 1.831138  | -2.036449 |
| H O | 2.688498  | 1.983276  | -1.521840 |
| H O | 1.445729  | 3.059229  | -0.863913 |
| C O | 1.681640  | -1.668788 | -0.524140 |
| C O | 0.478847  | -2.076601 | 0.106989  |
| C O | -0.788794 | -1.870591 | -0.511118 |
| O O | -1.846726 | -2.388130 | -0.087705 |
| B O | -3.270617 | -1.991055 | -0.691018 |
| C O | 2.865683  | -2.450557 | -0.270253 |
| N O | 3.832340  | -3.059229 | -0.052827 |
| H O | 1.604940  | -1.329750 | -1.555168 |
| H O | 0.515260  | -2.733111 | 0.970764  |
| H O | -0.846801 | -1.232647 | -1.403710 |
| H O | -3.783149 | -1.351514 | 0.208046  |

H O -3.036429 -1.328035 -1.686845  
H O -3.832340 -3.039186 -0.901722

#### TS-16+DMB

B3LYP/6-31G(d) Geometry

C O 0.538174 -1.685307 0.104205  
C O 0.099844 0.730024 1.577049  
C O 1.214638 0.588315 0.803518  
C O 1.471998 -0.641904 0.096533  
C O 2.114263 1.783210 0.565422  
C O 2.645289 -0.715997 -0.845074  
H O 0.829664 -2.616606 -0.377188  
H O -0.086838 -1.835008 0.978997  
H O -0.149416 1.692434 2.013994  
H O -0.538935 -0.092501 1.869055  
H O 1.832401 2.616606 1.213465  
H O 2.041735 2.132106 -0.472040  
H O 3.166265 1.545585 0.761713  
H O 2.603439 0.071588 -1.609442  
H O 2.694018 -1.683648 -1.351225  
H O 3.590480 -0.570670 -0.305776  
C O -0.949812 -1.130169 -1.076198  
C O -1.613909 0.043379 -0.649823  
C O -1.270925 1.299946 -1.227191  
C O -2.706951 -0.032156 0.259134  
N O -0.953492 2.296295 -1.745075  
N O -3.590480 -0.136775 1.013886  
H O -1.493657 -2.062436 -0.946210  
H O -0.406869 -1.062972 -2.013994

#### TS-17+DMB

B3LYP/6-31G(d) Geometry

C O 0.114806 -1.396137 1.045402  
C O 0.114806 1.396136 1.045403  
C O 0.818168 0.711054 0.060907  
C O 0.818170 -0.711054 0.060908  
C O 1.340712 1.465112 -1.140300  
C O 1.340719 -1.465112 -1.140297  
H O 0.031065 -2.478043 0.986767  
H O 0.002996 -0.990512 2.043848  
H O 0.031062 2.478041 0.986766  
H O 0.002998 0.990511 2.043849  
H O 1.286583 2.545223 -0.984079  
H O 0.763474 1.230314 -2.043849  
H O 2.385824 1.205428 -1.348110  
H O 0.763455 -1.230349 -2.043839  
H O 1.286632 -2.545223 -0.984058  
H O 2.385817 -1.205395 -1.348132  
C O -1.997060 -0.706639 0.682149  
C O -1.997062 0.706633 0.682150  
C O -2.218395 -1.451961 -0.519509  
C O -2.218396 1.451955 -0.519507  
N O -2.385824 2.077275 -1.487442  
N O -2.385823 -2.077279 -1.487444  
H O -2.324294 -1.202861 1.590574  
H O -2.324296 1.202852 1.590575

#### TS-18+DMB

B3LYP/6-31G(d) Geometry

C O -0.256313 -1.798720 -0.139285  
C O 0.664552 0.327576 1.433126  
C O 1.553384 -0.356874 0.606676  
C O 1.074910 -1.416097 -0.213644

C O 2.939229 0.203426 0.384760  
C O 1.952014 -1.965961 -1.317181  
H O -0.649547 -2.529848 -0.840739  
H O -0.819991 -1.718387 0.781282  
H O 1.020131 1.190529 1.990585  
H O -0.189029 -0.170702 1.877461  
H O 3.191785 0.948211 1.143605  
H O 3.021017 0.690373 -0.596180  
H O 3.698381 -0.586651 0.420699  
H O 2.311709 -1.177871 -1.990585  
H O 1.415963 -2.707509 -1.915844  
H O 2.841832 -2.457241 -0.903505  
C O -1.368075 0.143549 -0.718463  
C O -0.743973 1.202215 -0.022133  
C O -2.658659 -0.299129 -0.298884  
C O 0.172667 2.043149 -0.732671  
N O 0.932014 2.707509 -1.314154  
N O -3.698381 -0.679641 0.064348  
H O -1.125843 -0.018220 -1.762170  
H O -1.291254 1.687208 0.780403

#### TS-19+DMB

B3LYP/6-31G(d) Geometry

C O -0.186363 -1.803934 0.031640  
C O 0.714077 0.366733 1.552405  
C O 1.556531 -0.204441 0.619094  
C O 1.108229 -1.314732 -0.151063  
C O 2.843796 0.502011 0.249227  
C O 1.924930 -1.784037 -1.332947  
H O -0.519142 -2.628296 -0.595901  
H O -0.624318 -1.816585 1.024310  
H O 0.997916 1.290944 2.048541  
H O -0.075811 -0.191456 2.037740  
H O 3.077140 1.293540 0.966282  
H O 2.774678 0.965605 -0.743030  
H O 3.692032 -0.192912 0.229404  
H O 2.119463 -0.974138 -2.048541  
H O 1.421550 -2.594943 -1.867374  
H O 2.906000 -2.158525 -1.012503  
C O -1.536352 -0.277711 -0.508379  
C O -1.126372 0.939580 0.066548  
C O -2.831171 -0.906781 -0.031522  
C O -0.369910 1.877661 -0.691083  
N O 0.252499 2.628296 -1.332458  
H O -1.329438 -0.395577 -1.568788  
H O -1.659142 1.337160 0.925577  
H O -3.692032 -0.401040 -0.487608  
H O -2.938856 -0.819040 1.056302  
H O -2.896232 -1.967975 -0.292582

#### TS-20+DMB

B3LYP/6-31G(d) Geometry

C O 0.818696 -1.786565 0.093338  
C O 0.084201 0.575125 1.436570  
C O 1.217435 0.557403 0.659424  
C O 1.622515 -0.645613 0.004412  
C O 1.912416 1.861469 0.327482  
C O 2.745374 -0.606584 -1.004993  
H O 1.146236 -2.682702 -0.430440  
H O 0.291668 -2.004015 1.017163  
H O -0.297588 1.514163 1.827104  
H O -0.337858 -0.317419 1.877872  
H O 1.513009 2.682702 0.928161



|     |           |           |           |
|-----|-----------|-----------|-----------|
| H O | 1.779801  | 2.129593  | -0.728262 |
| H O | 2.991286  | 1.801544  | 0.515891  |
| H O | 2.547948  | 0.107215  | -1.816924 |
| H O | 2.911717  | -1.590101 | -1.453842 |
| H O | 3.688179  | -0.291076 | -0.539404 |
| C O | -0.909752 | -1.344011 | -0.895154 |
| C O | -1.609871 | -0.265982 | -0.326025 |
| C O | -1.549846 | 1.002002  | -0.979035 |
| C O | -2.738665 | -0.493033 | 0.661611  |
| N O | -1.518029 | 2.028897  | -1.534103 |
| H O | -1.324030 | -2.336831 | -0.730671 |
| H O | -0.470494 | -1.206686 | -1.877872 |
| H O | -2.530831 | -1.370927 | 1.284276  |
| H O | -3.688179 | -0.678342 | 0.140556  |
| H O | -2.889541 | 0.365977  | 1.321670  |

### TS-21+DMB

B3LYP/6-31G(d) Geometry

|     |           |           |           |
|-----|-----------|-----------|-----------|
| C O | 0.936718  | -1.534635 | -0.007619 |
| C O | 1.622593  | -0.414525 | 0.544623  |
| C O | 0.952727  | 0.461795  | 1.376574  |
| C O | -0.411864 | -1.734524 | 0.275563  |
| C O | 1.597389  | -2.353038 | -1.093479 |
| C O | 3.013786  | -0.064887 | 0.058876  |
| H O | 1.424262  | 1.387392  | 1.693592  |
| H O | 0.097725  | 0.155234  | 1.964538  |
| H O | -0.931890 | -2.555416 | -0.208260 |
| H O | -0.821017 | -1.465729 | 1.242371  |
| H O | 2.526602  | -2.812143 | -0.733097 |
| H O | 1.870932  | -1.741481 | -1.964538 |
| H O | 0.942348  | -3.157405 | -1.439013 |
| H O | 3.051536  | 0.073037  | -1.029095 |
| H O | 3.727324  | -0.862595 | 0.301253  |
| H O | 3.373889  | 0.855686  | 0.525369  |
| C O | -0.853903 | 1.183416  | -0.031979 |
| C O | -1.418684 | 0.008815  | -0.538657 |
| C O | 0.054611  | 1.995791  | -0.847163 |
| O O | 0.347855  | 3.157405  | -0.624521 |
| C O | -2.816068 | -0.335634 | -0.103908 |
| F O | -2.954980 | -0.255570 | 1.243313  |
| F O | -3.727324 | 0.507276  | -0.642859 |
| F O | -3.186005 | -1.583881 | -0.474342 |
| H O | -1.316656 | 1.688031  | 0.811113  |
| H O | -1.224003 | -0.251749 | -1.575703 |
| H O | 0.469849  | 1.463099  | -1.735263 |

### TS-22+DMB

B3LYP/6-31G(d) Geometry

|     |           |           |           |
|-----|-----------|-----------|-----------|
| C O | 1.203574  | -1.352724 | -0.869212 |
| C O | 1.910895  | -0.199813 | -0.437415 |
| C O | 1.467427  | 1.078610  | -0.797387 |
| C O | 0.070822  | -1.231012 | -1.658863 |
| C O | 1.585444  | -2.714990 | -0.328692 |
| C O | 3.001607  | -0.335631 | 0.602459  |
| H O | 2.048138  | 1.928145  | -0.445003 |
| H O | 1.021656  | 1.242053  | -1.772645 |
| H O | -0.497153 | -2.115166 | -1.932382 |
| H O | -0.089338 | -0.374630 | -2.299028 |
| H O | 1.543116  | -2.753106 | 0.766593  |
| H O | 2.610475  | -2.980301 | -0.618237 |
| H O | 0.921243  | -3.492398 | -0.716351 |
| H O | 3.825639  | -0.962453 | 0.236926  |
| H O | 2.640815  | -0.805337 | 1.527876  |

|     |           |           |           |
|-----|-----------|-----------|-----------|
| H O | 3.422693  | 0.639402  | 0.864361  |
| C O | -0.341616 | 1.450193  | 0.161655  |
| C O | -1.274038 | 0.559906  | -0.395177 |
| B O | -1.693466 | -0.821313 | 0.130380  |
| C O | -2.935110 | -1.570725 | -0.539099 |
| C O | -1.134581 | -1.402080 | 1.507473  |
| C O | -0.458163 | 2.941210  | -0.118775 |
| H O | 0.014500  | 1.216756  | 1.164172  |
| H O | -1.770780 | 0.935446  | -1.297692 |
| H O | -3.196613 | -1.206847 | -1.541135 |
| H O | -3.825639 | -1.425688 | 0.092884  |
| H O | -2.794246 | -2.658700 | -0.599595 |
| H O | -1.871308 | -1.191145 | 2.299028  |
| H O | -0.183791 | -0.971161 | 1.843934  |
| H O | -1.022977 | -2.494305 | 1.492332  |
| H O | -1.288538 | 3.367780  | 0.458524  |
| H O | -0.665755 | 3.132372  | -1.178233 |
| H O | 0.447056  | 3.492398  | 0.157375  |

### TS-23+DMB

B3LYP/6-31G(d) Geometry

|      |           |           |           |
|------|-----------|-----------|-----------|
| C O  | 0.844707  | -1.604660 | -0.592591 |
| C O  | 1.822419  | -0.740305 | -0.018592 |
| C O  | 1.822940  | 0.631237  | -0.304904 |
| C O  | -0.114163 | -1.104099 | -1.446627 |
| C O  | 0.757176  | -3.047053 | -0.140782 |
| C O  | 2.720790  | -1.261162 | 1.078511  |
| H O  | 2.620601  | 1.226576  | 0.132941  |
| H O  | 1.529393  | 0.972980  | -1.291918 |
| H O  | -0.922279 | -1.737809 | -1.799006 |
| H O  | 0.010312  | -0.175558 | -1.985523 |
| H O  | 0.602132  | -3.129375 | 0.941000  |
| H O  | 1.680451  | -3.590425 | -0.379340 |
| H O  | -0.069331 | -3.563152 | -0.636393 |
| H O  | 3.336106  | -2.097541 | 0.722428  |
| H O  | 2.145416  | -1.638339 | 1.933966  |
| H O  | 3.397056  | -0.482719 | 1.442344  |
| C O  | 0.202770  | 1.493475  | 0.590693  |
| C O  | -0.959646 | 0.989792  | -0.025531 |
| B O  | -1.819859 | -0.141703 | 0.470134  |
| Cl O | -3.397056 | -0.517450 | -0.301234 |
| Cl O | -1.443537 | -1.034609 | -1.985523 |
| C O  | 0.564484  | 2.957588  | 0.384150  |
| H O  | 0.404999  | 1.124147  | 1.594577  |
| H O  | -1.303849 | 1.526106  | -0.912201 |
| H O  | -0.127696 | 3.590425  | 0.953229  |
| H O  | 0.481654  | 3.246892  | -0.669823 |
| H O  | 1.578016  | 3.189566  | 0.726060  |

### TS-24+DMB

B3LYP/6-31G(d) Geometry

|     |           |           |           |
|-----|-----------|-----------|-----------|
| C O | -0.838693 | -1.579813 | -0.169778 |
| C O | -1.416379 | -0.541433 | 0.629284  |
| C O | -0.607501 | 0.238605  | 1.440842  |
| C O | 0.512991  | -1.851546 | -0.081126 |
| C O | -1.665399 | -2.234733 | -1.252537 |
| C O | -2.855395 | -0.138523 | 0.407450  |
| H O | -1.036098 | 1.090248  | 1.962771  |
| H O | 0.325122  | -0.126326 | 1.855357  |
| H O | 0.970377  | -2.563587 | -0.762525 |
| H O | 1.079418  | -1.653126 | 0.820506  |
| H O | -2.053945 | -1.495835 | -1.962771 |
| H O | -2.529915 | -2.758204 | -0.825511 |



|     |           |           |           |
|-----|-----------|-----------|-----------|
| H O | -1.075924 | -2.967600 | -1.809653 |
| H O | -3.529885 | -0.994012 | 0.532645  |
| H O | -3.005832 | 0.247924  | -0.608524 |
| H O | -3.162342 | 0.637961  | 1.112516  |
| C O | 0.732684  | 1.195227  | -0.093321 |
| C O | 1.432663  | 0.192934  | -0.748110 |
| N O | -0.317112 | 1.863279  | -0.837338 |
| N O | 2.743975  | -0.136436 | -0.238033 |
| O O | -0.679216 | 2.967600  | -0.431972 |
| O O | -0.802960 | 1.270161  | -1.808921 |
| O O | 2.981830  | 0.115438  | 0.952330  |
| O O | 3.529885  | -0.680396 | -1.014200 |
| H O | 1.175659  | 1.807821  | 0.677295  |
| H O | 1.290209  | -0.043664 | -1.790200 |

#### TS-25+DMB

B3LYP/6-31G(d) Geometry

|     |           |           |           |
|-----|-----------|-----------|-----------|
| C O | -0.379274 | 1.089386  | 0.096622  |
| C O | 1.041147  | 0.985269  | 0.052598  |
| C O | 1.707416  | 0.235132  | 0.999486  |
| C O | -1.095090 | 0.386726  | 1.076853  |
| C O | -1.124410 | 1.746296  | -1.039903 |
| C O | 1.797230  | 1.518189  | -1.145616 |
| H O | 2.771753  | 0.042755  | 0.899249  |
| H O | 1.295987  | 0.033488  | 1.978954  |
| H O | -2.179057 | 0.460592  | 1.080480  |
| H O | -0.666143 | 0.264965  | 2.065854  |
| H O | -0.944802 | 1.235157  | -1.993898 |
| H O | -0.804306 | 2.788213  | -1.167642 |
| H O | -2.202229 | 1.742932  | -0.861395 |
| H O | 1.605924  | 2.587536  | -1.294713 |
| H O | 1.500632  | 1.000859  | -2.065854 |
| H O | 2.875621  | 1.388175  | -1.019753 |
| C O | 0.518418  | -1.951842 | 0.654590  |
| C O | -0.852859 | -1.602710 | 0.661028  |
| C O | 1.375540  | -2.128328 | -0.499651 |
| C O | -1.870439 | -1.688479 | -0.466432 |
| O O | -3.044009 | -1.825175 | -0.186379 |
| O O | -1.467096 | -1.552389 | -1.731511 |
| O O | 1.135121  | -1.817500 | -1.673917 |
| O O | 2.562555  | -2.705724 | -0.190857 |
| H O | 0.934793  | -2.336144 | 1.579203  |
| H O | -1.359679 | -1.893685 | 1.577308  |
| H O | -0.473060 | -1.571823 | -1.802329 |
| H O | 3.044009  | -2.788213 | -1.034490 |

#### TS-26+DMB

B3LYP/6-31G(d) Geometry

|     |           |           |           |
|-----|-----------|-----------|-----------|
| C O | 0.591912  | 0.441501  | -1.880830 |
| C O | -0.144481 | -2.009253 | -0.661633 |
| C O | 1.072348  | -1.445660 | -0.375587 |
| C O | 1.488927  | -0.246804 | -1.041195 |
| C O | 1.906377  | -1.996661 | 0.760787  |
| C O | 2.774139  | 0.422976  | -0.637953 |
| H O | 0.968634  | 1.325871  | -2.390322 |
| H O | -0.124035 | -0.119166 | -2.474143 |
| H O | -0.524917 | -2.831166 | -0.062419 |
| H O | -0.711857 | -1.787824 | -1.555276 |
| H O | 1.431473  | -2.875185 | 1.203715  |
| H O | 2.043494  | -1.253726 | 1.555040  |
| H O | 2.904055  | -2.293050 | 0.414819  |
| H O | 2.702801  | 0.829151  | 0.381357  |
| H O | 3.022142  | 1.251718  | -1.304761 |

|     |           |           |           |
|-----|-----------|-----------|-----------|
| H O | 3.609198  | -0.286982 | -0.640336 |
| C O | -0.801810 | 1.220219  | -0.698735 |
| C O | -1.587758 | 0.219570  | -0.043340 |
| C O | -0.040278 | 2.137718  | 0.115385  |
| C O | -1.422729 | -0.080321 | 1.339654  |
| C O | -2.714792 | -0.310154 | -0.733270 |
| N O | -1.279343 | -0.307386 | 2.474143  |
| N O | 0.605829  | 2.875185  | 0.739423  |
| N O | -3.609198 | -0.737588 | -1.347850 |
| H O | -1.303745 | 1.713710  | -1.529216 |

#### TS-27+DMB

B3LYP/6-31G(d) Geometry

|     |           |           |           |
|-----|-----------|-----------|-----------|
| C O | -0.734320 | -1.570313 | -0.975738 |
| C O | -0.073855 | 1.145350  | -1.198093 |
| C O | -1.192809 | 0.775431  | -0.486288 |
| C O | -1.571100 | -0.597568 | -0.415573 |
| C O | -1.904964 | 1.799115  | 0.373720  |
| C O | -2.717889 | -1.016682 | 0.474037  |
| H O | -1.038059 | -2.612198 | -0.889200 |
| H O | -0.207724 | -1.358973 | -1.901427 |
| H O | 0.297514  | 2.164775  | -1.143465 |
| H O | 0.312450  | 0.555055  | -2.017520 |
| H O | -1.477899 | 2.795276  | 0.231951  |
| H O | -1.836831 | 1.558097  | 1.441859  |
| H O | -2.972333 | 1.854553  | 0.124596  |
| H O | -2.577067 | -0.700097 | 1.516382  |
| H O | -2.850016 | -2.102299 | 0.467584  |
| H O | -3.661515 | -0.565765 | 0.138869  |
| C O | 1.007947  | -1.539235 | 0.113388  |
| C O | 1.690910  | -0.323363 | -0.121050 |
| C O | 0.567120  | -1.918169 | 1.512892  |
| C O | 1.822581  | 0.620378  | 0.942047  |
| C O | 2.686598  | -0.212018 | -1.261207 |
| N O | 1.961405  | 1.376192  | 1.821443  |
| H O | 1.387633  | -2.373905 | -0.476570 |
| H O | 0.036743  | -1.096208 | 2.002567  |
| H O | 1.439274  | -2.154148 | 2.136169  |
| H O | -0.087317 | -2.795276 | 1.502975  |
| H O | 2.332380  | -0.770631 | -2.136169 |
| H O | 3.661515  | -0.633137 | -0.979139 |
| H O | 2.852461  | 0.825969  | -1.563772 |

#### TS-28+DMB

B3LYP/6-31G(d) Geometry

|     |           |           |           |
|-----|-----------|-----------|-----------|
| C O | 0.195612  | 1.527697  | -0.202003 |
| C O | 0.401484  | -1.022529 | -1.340229 |
| C O | 1.437491  | -0.539464 | -0.570462 |
| C O | 1.351942  | 0.765519  | -0.006143 |
| C O | 2.543659  | -1.477879 | -0.136557 |
| C O | 2.370332  | 1.207440  | 1.018690  |
| H O | 0.153432  | 2.512856  | 0.258415  |
| H O | -0.324097 | 1.481304  | -1.154019 |
| H O | 0.397649  | -2.060722 | -1.660783 |
| H O | -0.282035 | -0.373600 | -1.871074 |
| H O | 2.505388  | -2.415784 | -0.696948 |
| H O | 2.460051  | -1.726652 | 0.928970  |
| H O | 3.533822  | -1.033420 | -0.294590 |
| H O | 2.424749  | 0.516556  | 1.871074  |
| H O | 2.138376  | 2.204021  | 1.405488  |
| H O | 3.378913  | 1.246784  | 0.586597  |
| C O | -1.370613 | 0.569040  | 0.745366  |
| C O | -1.466216 | -0.779497 | 0.319245  |

|     |           |           |           |
|-----|-----------|-----------|-----------|
| C O | -2.490540 | 1.542407  | 0.421010  |
| C O | -0.864573 | -1.765465 | 1.159035  |
| C O | -2.551671 | -1.257730 | -0.628046 |
| N O | -0.379596 | -2.557688 | 1.866885  |
| H O | -0.944183 | 0.704523  | 1.735743  |
| H O | -3.414316 | 1.251844  | 0.938972  |
| H O | -2.716779 | 1.577973  | -0.650037 |
| H O | -2.237451 | 2.557688  | 0.741135  |
| H O | -2.641383 | -0.602412 | -1.501228 |
| H O | -3.533822 | -1.272959 | -0.133723 |
| H O | -2.346895 | -2.269565 | -0.987278 |

#### TS-29+DMB

B3LYP/6-31G(d) Geometry

|     |           |           |           |
|-----|-----------|-----------|-----------|
| C O | 0.290105  | -1.878179 | -0.326949 |
| C O | -0.750365 | 0.320190  | -1.689702 |
| C O | -1.559032 | -0.375109 | -0.789967 |
| C O | -1.017650 | -1.484273 | -0.084983 |
| C O | -2.890134 | 0.210862  | -0.379019 |
| C O | -1.784702 | -2.090573 | 1.070168  |
| H O | 0.743637  | -2.653679 | 0.284710  |
| H O | 0.753689  | -1.748804 | -1.295686 |
| H O | -1.141219 | 1.217312  | -2.163504 |
| H O | 0.005485  | -0.194322 | -2.272136 |
| H O | -3.207170 | 0.997389  | -1.068340 |
| H O | -2.844529 | 0.652863  | 0.625432  |
| H O | -3.673110 | -0.556427 | -0.359219 |
| H O | -2.089516 | -1.337885 | 1.807977  |
| H O | -1.189144 | -2.849708 | 1.584343  |
| H O | -2.704431 | -2.575238 | 0.717923  |
| C O | 1.486763  | 0.046879  | 0.264996  |
| C O | 0.850187  | 1.102627  | -0.444956 |
| C O | 2.698564  | -0.453139 | -0.315125 |
| C O | 1.358418  | -0.068375 | 1.775307  |
| C O | 0.089257  | 2.073108  | 0.286729  |
| N O | -0.541280 | 2.849708  | 0.883089  |
| N O | 3.673110  | -0.880154 | -0.790916 |
| H O | 1.355506  | 1.498266  | -1.320971 |
| H O | 0.316602  | 0.057509  | 2.081357  |
| H O | 1.946508  | 0.713944  | 2.272136  |
| H O | 1.714541  | -1.037783 | 2.131597  |

#### TS-30+DMB

B3LYP/6-31G(d) Geometry

|     |           |           |           |
|-----|-----------|-----------|-----------|
| C O | 0.967913  | 0.913460  | -1.475909 |
| C O | -0.122501 | -1.547731 | -0.757743 |
| C O | 1.074436  | -1.142023 | -0.185639 |
| C O | 1.645061  | 0.103176  | -0.565080 |
| C O | 1.626009  | -1.891676 | 1.006044  |
| C O | 2.808294  | 0.671555  | 0.213818  |
| H O | 1.359256  | 1.904341  | -1.692652 |
| H O | 0.382087  | 0.482720  | -2.280149 |
| H O | -0.617858 | -2.440980 | -0.387174 |
| H O | -0.391967 | -1.266797 | -1.768209 |
| H O | 1.071517  | -2.816459 | 1.183150  |
| H O | 1.571543  | -1.289345 | 1.921535  |
| H O | 2.680308  | -2.154509 | 0.854974  |
| H O | 2.529205  | 0.881690  | 1.254717  |
| H O | 3.162369  | 1.606451  | -0.227636 |
| H O | 3.650203  | -0.030720 | 0.239558  |
| C O | -0.905193 | 1.354454  | -0.439929 |
| C O | -1.594009 | 0.143610  | -0.166824 |
| C O | -0.363563 | 2.156067  | 0.617726  |

|     |           |           |           |
|-----|-----------|-----------|-----------|
| C O | -1.698932 | -0.310593 | 1.190319  |
| C O | -2.731482 | -0.266109 | -1.090767 |
| N O | -1.813209 | -0.706222 | 2.280149  |
| N O | 0.097233  | 2.816459  | 1.458530  |
| H O | -1.260027 | 1.929126  | -1.291924 |
| H O | -2.482578 | -0.032814 | -2.131866 |
| H O | -3.650203 | 0.277454  | -0.836704 |
| H O | -2.947345 | -1.335441 | -1.019739 |

#### TS-31+DMB

B3LYP/6-31G(d) Geometry

|     |           |           |           |
|-----|-----------|-----------|-----------|
| C O | -1.365109 | -0.589931 | -0.323825 |
| C O | -1.350619 | 0.817341  | -0.524603 |
| C O | -0.369321 | 1.383988  | -1.317313 |
| C O | -0.345200 | -1.374901 | -0.868602 |
| C O | -2.326953 | -1.196729 | 0.672800  |
| C O | -2.273670 | 1.710604  | 0.278977  |
| H O | -0.252493 | 2.462597  | -1.365545 |
| H O | 0.093571  | 0.839262  | -2.129257 |
| H O | -0.362335 | -2.444055 | -0.667656 |
| H O | 0.072430  | -1.126615 | -1.837772 |
| H O | -3.368145 | -1.023546 | 0.370329  |
| H O | -2.220489 | -0.763883 | 1.676919  |
| H O | -2.183049 | -2.277581 | 0.756745  |
| H O | -2.163230 | 1.564365  | 1.361140  |
| H O | -3.325658 | 1.507369  | 0.039999  |
| H O | -2.084969 | 2.765803  | 0.063343  |
| C O | 1.675538  | 0.583219  | -0.305183 |
| C O | 1.471105  | -0.768560 | 0.061334  |
| C O | 1.615612  | 1.729258  | 0.599250  |
| O O | 2.161790  | 2.804276  | 0.387728  |
| C O | 1.177347  | -1.121521 | 1.513747  |
| C O | 2.370787  | -1.783444 | -0.637303 |
| H O | 2.250531  | 0.780147  | -1.208840 |
| H O | 1.037978  | 1.575212  | 1.536674  |
| H O | 0.388262  | -0.502156 | 1.947275  |
| H O | 0.870552  | -2.168896 | 1.605775  |
| H O | 2.077845  | -0.988257 | 2.129257  |
| H O | 3.368145  | -1.776503 | -0.176595 |
| H O | 1.982025  | -2.804276 | -0.554614 |
| H O | 2.499907  | -1.548870 | -1.699329 |

#### TS-32+DMB

B3LYP/6-31G(d) Geometry

|     |           |           |           |
|-----|-----------|-----------|-----------|
| C O | -1.155348 | -1.421975 | -0.592950 |
| C O | -1.494591 | -0.071977 | -0.918014 |
| C O | -0.579772 | 0.732975  | -1.627729 |
| C O | 0.020450  | -1.967845 | -1.047736 |
| C O | -1.999742 | -2.190890 | 0.401115  |
| C O | -2.718833 | 0.562027  | -0.309549 |
| H O | -0.890752 | 1.744042  | -1.880197 |
| H O | 0.030164  | 0.270350  | -2.398257 |
| H O | 0.353715  | -2.936182 | -0.686034 |
| H O | 0.580768  | -1.569329 | -1.882108 |
| H O | -3.054965 | -2.203657 | 0.105442  |
| H O | -1.942190 | -1.743407 | 1.401282  |
| H O | -1.661419 | -3.226498 | 0.483151  |
| H O | -2.747117 | 0.443075  | 0.781033  |
| H O | -3.630598 | 0.085339  | -0.694745 |
| H O | -2.775686 | 1.628371  | -0.540629 |
| C O | 0.960034  | 1.108916  | -0.466452 |
| C O | 1.593298  | -0.075468 | 0.026644  |
| C O | 0.327445  | 2.060867  | 0.506226  |

|   |   |          |           |           |
|---|---|----------|-----------|-----------|
| O | 0 | 0.123948 | 3.226498  | 0.242074  |
| C | 0 | 2.723391 | -0.603772 | -0.661470 |
| C | 0 | 1.298073 | -0.580107 | 1.328887  |
| N | 0 | 3.630598 | -1.018703 | -1.265590 |
| N | 0 | 1.024255 | -0.957630 | 2.398257  |
| H | 0 | 1.513597 | 1.630789  | -1.244712 |
| H | 0 | 0.042484 | 1.630143  | 1.486575  |

#### TS-33+DMB

B3LYP/6-31G(d) Geometry

|   |   |           |           |           |
|---|---|-----------|-----------|-----------|
| C | 0 | 0.094975  | 1.388902  | -1.392788 |
| C | 0 | 0.095038  | -1.388989 | -1.392786 |
| C | 0 | 1.259580  | -0.708710 | -1.026305 |
| C | 0 | 1.259555  | 0.708670  | -1.026319 |
| C | 0 | 2.402325  | -1.469306 | -0.399389 |
| C | 0 | 2.402270  | 1.469319  | -0.399412 |
| H | 0 | 0.051378  | 2.469069  | -1.284916 |
| H | 0 | -0.584915 | 0.988418  | -2.134890 |
| H | 0 | 0.051461  | -2.469153 | -1.284874 |
| H | 0 | -0.584875 | -0.988535 | -2.134882 |
| H | 0 | 2.269194  | -2.547944 | -0.506915 |
| H | 0 | 2.487433  | -1.247281 | 0.672283  |
| H | 0 | 3.357310  | -1.195913 | -0.863243 |
| H | 0 | 2.487204  | 1.247506  | 0.672320  |
| H | 0 | 2.269223  | 2.547944  | -0.507170 |
| H | 0 | 3.357299  | 1.195764  | -0.863072 |
| C | 0 | -1.361623 | 0.725446  | 0.169417  |
| C | 0 | -1.361649 | -0.725482 | 0.169432  |
| C | 0 | -2.481522 | 1.412118  | -0.416624 |
| C | 0 | -0.728430 | 1.407990  | 1.267097  |
| C | 0 | -0.728478 | -1.408041 | 1.267110  |
| N | 0 | -3.357310 | 1.987236  | -0.921260 |
| C | 0 | -2.481529 | -1.412134 | -0.416656 |
| N | 0 | -0.190634 | 1.965156  | 2.134868  |
| N | 0 | -0.190709 | -1.965222 | 2.134890  |
| N | 0 | -3.357309 | -1.987234 | -0.921331 |

#### TS-34+DMB

B3LYP/6-31G(d) Geometry

|   |   |           |           |           |
|---|---|-----------|-----------|-----------|
| C | 0 | 0.226232  | 1.043353  | -1.647182 |
| C | 0 | 0.224360  | -1.738217 | -1.204525 |
| C | 0 | 1.323553  | -0.999000 | -0.837280 |
| C | 0 | 1.363067  | 0.401578  | -1.112208 |
| C | 0 | 2.398246  | -1.629802 | 0.021190  |
| C | 0 | 2.499662  | 1.235915  | -0.587526 |
| H | 0 | 0.326405  | 2.101910  | -1.874990 |
| H | 0 | -0.390184 | 0.512533  | -2.366611 |
| H | 0 | 0.109941  | -2.762666 | -0.862550 |
| H | 0 | -0.477817 | -1.424956 | -1.964828 |
| H | 0 | 2.219083  | -2.699947 | 0.148353  |
| H | 0 | 2.428609  | -1.175396 | 1.018552  |
| H | 0 | 3.390958  | -1.506235 | -0.427741 |
| H | 0 | 2.471324  | 1.292080  | 0.509970  |
| H | 0 | 2.458181  | 2.258348  | -0.969471 |
| H | 0 | 3.468949  | 0.802546  | -0.859811 |
| C | 0 | -1.201810 | 1.067543  | -0.261054 |
| C | 0 | -1.516237 | -0.277350 | 0.163668  |
| C | 0 | -0.551751 | 1.895026  | 0.738764  |
| C | 0 | -0.986138 | -0.812348 | 1.374079  |
| C | 0 | -2.596167 | -0.973083 | -0.450808 |
| N | 0 | -0.541247 | -1.232676 | 2.366611  |
| N | 0 | -0.020628 | 2.597463  | 1.497453  |
| N | 0 | -3.468949 | -1.527589 | -0.990938 |

|   |   |           |          |           |
|---|---|-----------|----------|-----------|
| C | 0 | -2.289981 | 1.824220 | -1.034678 |
| H | 0 | -3.124168 | 2.055372 | -0.364377 |
| H | 0 | -2.674486 | 1.213267 | -1.854864 |
| H | 0 | -1.903086 | 2.762666 | -1.438176 |

#### TS-35+DMB

B3LYP/6-31G(d) Geometry

|   |   |           |           |           |
|---|---|-----------|-----------|-----------|
| C | 0 | -1.468841 | -0.825211 | -0.842509 |
| C | 0 | -1.269920 | 0.576198  | -0.964749 |
| C | 0 | -0.052205 | 1.062728  | -1.488753 |
| C | 0 | -0.487107 | -1.693299 | -1.280347 |
| C | 0 | -2.640421 | -1.360839 | -0.048377 |
| C | 0 | -2.253248 | 1.536435  | -0.343217 |
| H | 0 | 0.056499  | 2.140719  | -1.582855 |
| H | 0 | 0.407182  | 0.520278  | -2.309416 |
| H | 0 | -0.546207 | -2.752368 | -1.046347 |
| H | 0 | 0.231269  | -1.434402 | -2.046217 |
| H | 0 | -3.589044 | -0.947313 | -0.409441 |
| H | 0 | -2.548963 | -1.104327 | 1.014471  |
| H | 0 | -2.699577 | -2.449464 | -0.121776 |
| H | 0 | -2.450983 | 1.301698  | 0.710075  |
| H | 0 | -3.221620 | 1.483912  | -0.859064 |
| H | 0 | -1.899417 | 2.568727  | -0.404550 |
| C | 0 | 1.482661  | 0.603387  | -0.284288 |
| C | 0 | 1.390323  | -0.777896 | 0.128113  |
| C | 0 | 1.145974  | 1.634676  | 0.761155  |
| O | 0 | 1.615775  | 2.752368  | 0.764679  |
| C | 0 | 2.310902  | -1.740439 | -0.387189 |
| C | 0 | 0.704820  | -1.136051 | 1.332247  |
| C | 0 | 2.656513  | 0.987713  | -1.171977 |
| N | 0 | 3.056875  | -2.514544 | -0.838163 |
| N | 0 | 0.124300  | -1.396771 | 2.309416  |
| H | 0 | 0.416623  | 1.314031  | 1.529971  |
| H | 0 | 2.547719  | 2.016155  | -1.521284 |
| H | 0 | 3.589044  | 0.930563  | -0.600123 |
| H | 0 | 2.751283  | 0.317742  | -2.030565 |

#### TS-36+DMB

B3LYP/6-31G(d) Geometry

|   |   |           |           |           |
|---|---|-----------|-----------|-----------|
| C | 0 | 1.515004  | 0.287333  | -0.667196 |
| C | 0 | 1.336187  | -1.124184 | -0.688296 |
| C | 0 | 0.214143  | -1.669385 | -1.276374 |
| C | 0 | 0.485866  | 1.124556  | -1.128649 |
| C | 0 | 2.692534  | 0.884563  | 0.067993  |
| C | 0 | 2.290971  | -2.020932 | 0.074764  |
| H | 0 | -0.004257 | -2.728407 | -1.176384 |
| H | 0 | -0.335260 | -1.158483 | -2.053949 |
| H | 0 | 0.668768  | 2.196629  | -1.086529 |
| H | 0 | -0.089875 | 0.834090  | -2.002963 |
| H | 0 | 3.641002  | 0.567727  | -0.386175 |
| H | 0 | 2.735663  | 0.573684  | 1.120834  |
| H | 0 | 2.664226  | 1.977532  | 0.042731  |
| H | 0 | 2.372261  | -1.742823 | 1.133149  |
| H | 0 | 3.304212  | -1.965607 | -0.343845 |
| H | 0 | 1.970764  | -3.065297 | 0.026566  |
| C | 0 | -1.718410 | -0.345033 | -0.205963 |
| C | 0 | -1.117080 | 0.908610  | 0.118091  |
| C | 0 | -1.692962 | -1.492220 | 0.706646  |
| O | 0 | -2.440597 | -2.462902 | 0.624873  |
| C | 0 | -2.708647 | -0.448277 | -1.340317 |
| C | 0 | -0.492077 | 1.096826  | 1.497852  |
| C | 0 | -1.872761 | 2.159777  | -0.338180 |
| H | 0 | -0.961476 | -1.433833 | 1.536245  |

|     |           |           |           |
|-----|-----------|-----------|-----------|
| H O | -2.966495 | -1.496023 | -1.508292 |
| H O | -3.641002 | 0.086294  | -1.110978 |
| H O | -2.322400 | -0.017275 | -2.274286 |
| H O | 0.212042  | 0.303410  | 1.757213  |
| H O | 0.046841  | 2.049201  | 1.544862  |
| H O | -1.268438 | 1.118319  | 2.274286  |
| H O | -2.817853 | 2.247245  | 0.214920  |
| H O | -1.290925 | 3.065297  | -0.137549 |
| H O | -2.117158 | 2.143784  | -1.403570 |

#### TS-37+DMB

B3LYP/6-31G(d) Geometry

|     |           |           |           |
|-----|-----------|-----------|-----------|
| C O | -2.709866 | -0.173228 | -1.036329 |
| C O | -0.118478 | 0.548184  | -1.735580 |
| C O | -0.923372 | 1.472700  | -1.063856 |
| C O | -2.253609 | 1.124387  | -0.740104 |
| C O | -0.308475 | 2.743702  | -0.523424 |
| C O | -3.087064 | 2.021755  | 0.141654  |
| H O | -3.698268 | -0.468212 | -0.693659 |
| H O | -2.397779 | -0.678818 | -1.943831 |
| H O | 0.934312  | 0.765786  | -1.892321 |
| H O | -0.544838 | -0.149486 | -2.445640 |
| H O | 0.767055  | 2.776573  | -0.713521 |
| H O | -0.466680 | 2.850650  | 0.555782  |
| H O | -0.760909 | 3.622907  | -1.000119 |
| H O | -2.688959 | 2.055686  | 1.164662  |
| H O | -4.120953 | 1.673241  | 0.200316  |
| H O | -3.094888 | 3.049209  | -0.239053 |
| C O | -1.430796 | -1.449713 | 0.104968  |
| C O | -0.095401 | -1.368356 | -0.447608 |
| C O | 0.939108  | -0.689038 | 0.301344  |
| O O | 2.146768  | -0.835676 | 0.028371  |
| C O | -2.173189 | -2.661931 | -0.152952 |
| C O | 0.333720  | -2.379306 | -1.484994 |
| C O | -1.679716 | -0.884798 | 1.412732  |
| N O | -2.782518 | -3.622907 | -0.391950 |
| N O | -1.885779 | -0.392217 | 2.445640  |
| H O | 0.664423  | -0.013801 | 1.119331  |
| H O | -0.442414 | -2.542845 | -2.239382 |
| H O | 0.532970  | -3.348090 | -1.010935 |
| H O | 1.253783  | -2.055463 | -1.974765 |
| B O | 3.291543  | 0.073606  | 0.704041  |
| H O | 3.671814  | 0.751341  | -0.229673 |
| H O | 2.729198  | 0.704317  | 1.577825  |
| H O | 4.120953  | -0.713524 | 1.088656  |

#### TS-38+DMB

B3LYP/6-31G(d) Geometry

|     |           |           |           |
|-----|-----------|-----------|-----------|
| C O | 0.074159  | -1.645075 | -0.892460 |
| C O | -0.450912 | 0.963882  | -1.687396 |
| C O | -1.433046 | 0.251360  | -1.003868 |
| C O | -1.166694 | -1.084996 | -0.606117 |
| C O | -2.656889 | 0.971490  | -0.484476 |
| C O | -2.125963 | -1.806142 | 0.314527  |
| H O | 0.324281  | -2.627181 | -0.499648 |
| H O | 0.619490  | -1.379093 | -1.789132 |
| H O | -0.618540 | 2.014712  | -1.908420 |
| H O | 0.221997  | 0.464985  | -2.374209 |
| H O | -2.723857 | 1.982713  | -0.893136 |
| H O | -2.647359 | 1.057417  | 0.609960  |
| H O | -3.575553 | 0.436963  | -0.756449 |
| H O | -2.320217 | -1.244060 | 1.237107  |
| H O | -1.743830 | -2.792094 | 0.592557  |

|     |           |           |           |
|-----|-----------|-----------|-----------|
| H O | -3.098649 | -1.953338 | -0.172236 |
| C O | 1.496460  | -0.271295 | 0.228149  |
| C O | 1.297635  | 1.043537  | -0.303611 |
| C O | 2.650432  | -0.986576 | -0.239523 |
| C O | 1.074853  | -0.592962 | 1.655246  |
| C O | 0.691984  | 2.003423  | 0.580409  |
| C O | 2.293559  | 1.633056  | -1.296472 |
| N O | 0.207888  | 2.792094  | 1.288336  |
| N O | 3.575553  | -1.588483 | -0.613526 |
| H O | 0.056843  | -0.242292 | 1.842367  |
| H O | 1.733766  | -0.090031 | 2.374209  |
| H O | 1.117676  | -1.667778 | 1.847188  |
| H O | 2.558057  | 0.898855  | -2.062664 |
| H O | 3.219681  | 1.923081  | -0.785818 |
| H O | 1.885463  | 2.520629  | -1.786676 |

#### TS-39+DMB

B3LYP/6-31G(d) Geometry

|     |           |           |           |
|-----|-----------|-----------|-----------|
| C O | 0.351254  | 1.387200  | -1.255455 |
| C O | 0.351257  | -1.387205 | -1.255454 |
| C O | 1.430649  | -0.709533 | -0.695689 |
| C O | 1.430648  | 0.709531  | -0.695689 |
| C O | 2.438886  | -1.467770 | 0.136537  |
| C O | 2.438882  | 1.467770  | 0.136537  |
| H O | 0.301210  | 2.469090  | -1.164976 |
| H O | -0.183897 | 0.984926  | -2.107391 |
| H O | 0.301214  | -2.469095 | -1.164974 |
| H O | -0.183896 | -0.984932 | -2.107388 |
| H O | 2.329904  | -2.547138 | 0.004588  |
| H O | 2.319259  | -1.250387 | 1.205706  |
| H O | 3.465468  | -1.195612 | -0.137203 |
| H O | 2.319249  | 1.250394  | 1.205707  |
| H O | 2.329904  | 2.547138  | 0.004582  |
| H O | 3.465465  | 1.195607  | -0.137196 |
| C O | -1.408924 | 0.716312  | -0.031943 |
| C O | -1.408925 | -0.716314 | -0.031942 |
| C O | -2.476882 | 1.473616  | -0.813174 |
| C O | -0.969306 | 1.389758  | 1.160883  |
| C O | -0.969308 | -1.389759 | 1.160884  |
| C O | -2.476883 | -1.473619 | -0.813173 |
| N O | -0.625816 | -1.975282 | 2.107391  |
| N O | -0.625814 | 1.975282  | 2.107387  |
| H O | -3.465468 | 1.333306  | -0.357067 |
| H O | -2.538132 | 1.131367  | -1.850326 |
| H O | -2.263593 | 2.545222  | -0.822037 |
| H O | -2.538130 | -1.131371 | -1.850327 |
| H O | -3.465468 | -1.333308 | -0.357068 |
| H O | -2.263594 | -2.545225 | -0.822035 |

#### TS-40+DMB

B3LYP/6-31G(d) Geometry

|     |           |           |           |
|-----|-----------|-----------|-----------|
| C O | -0.228696 | -1.359008 | -0.951420 |
| C O | -0.485450 | 1.358614  | -1.523382 |
| C O | -1.478032 | 0.726152  | -0.803203 |
| C O | -1.379382 | -0.670234 | -0.549721 |
| C O | -2.543867 | 1.549614  | -0.111247 |
| C O | -2.381356 | -1.342848 | 0.359560  |
| H O | -0.172182 | -2.422232 | -0.726486 |
| H O | 0.253953  | -1.097150 | -1.887668 |
| H O | -0.475596 | 2.442102  | -1.604040 |
| H O | 0.115960  | 0.836739  | -2.255099 |
| H O | -2.478325 | 2.600974  | -0.402940 |
| H O | -2.450498 | 1.503606  | 0.981118  |

|     |           |           |           |
|-----|-----------|-----------|-----------|
| H O | -3.550394 | 1.193554  | -0.364846 |
| H O | -2.443933 | -0.859630 | 1.343726  |
| H O | -2.132086 | -2.396084 | 0.516634  |
| H O | -3.391378 | -1.302003 | -0.069916 |
| C O | 1.382361  | -0.607222 | 0.138110  |
| C O | 1.519463  | 0.775324  | -0.192687 |
| C O | 2.439530  | -1.557773 | -0.415661 |
| C O | 0.960053  | -0.952693 | 1.559805  |
| C O | 1.146918  | 1.749433  | 0.784665  |
| C O | 2.514232  | 1.254741  | -1.237027 |
| N O | 0.870980  | 2.547010  | 1.591929  |
| H O | 3.403074  | -1.379093 | 0.082054  |
| H O | 2.600866  | -1.440581 | -1.490981 |
| H O | 2.165413  | -2.600974 | -0.229295 |
| H O | 0.119600  | -0.342203 | 1.898525  |
| H O | 1.791395  | -0.771923 | 2.255099  |
| H O | 0.680070  | -2.007976 | 1.643892  |
| H O | 2.412070  | 0.704239  | -2.179202 |
| H O | 3.550394  | 1.119496  | -0.895590 |
| H O | 2.373475  | 2.316826  | -1.454037 |

#### TS-41+DMB

B3LYP/6-31G(d) Geometry

|     |           |           |           |
|-----|-----------|-----------|-----------|
| C O | 1.116491  | -0.671519 | -0.056209 |
| C O | 0.723980  | 0.654881  | 0.313346  |
| C O | -0.152561 | 0.856095  | 1.353040  |
| C O | 0.523052  | -1.774427 | 0.556717  |
| C O | 2.019964  | -0.881115 | -1.251291 |
| C O | 1.143009  | 1.830976  | -0.546427 |
| H O | -0.552035 | 1.845648  | 1.554709  |
| H O | -0.282885 | 0.131885  | 2.145840  |
| H O | 0.820958  | -2.766137 | 0.222371  |
| H O | 0.240089  | -1.738769 | 1.602982  |
| H O | 3.032491  | -0.510510 | -1.039403 |
| H O | 1.676213  | -0.347553 | -2.145840 |
| H O | 2.104856  | -1.942349 | -1.501461 |
| H O | 0.803575  | 1.729960  | -1.584544 |
| H O | 2.235474  | 1.931285  | -0.575473 |
| H O | 0.734599  | 2.766137  | -0.154383 |
| C O | -2.129546 | -0.560094 | 0.688270  |
| C O | -1.514763 | -1.654178 | 0.047873  |
| C O | -2.412422 | 0.114331  | -0.592385 |
| C O | -1.696466 | -1.043916 | -1.351764 |
| O O | -3.032491 | 1.090119  | -0.955378 |
| H O | -2.542805 | -0.430803 | 1.683835  |
| H O | -1.616787 | -2.703653 | 0.304416  |
| H O | -0.774748 | -0.771718 | -1.878876 |
| H O | -2.356507 | -1.587496 | -2.037717 |

#### TS-42+DMB

B3LYP/6-31G(d) Geometry

|     |           |           |           |
|-----|-----------|-----------|-----------|
| C O | -1.551040 | -0.688318 | -0.483984 |
| C O | -1.197095 | 0.604462  | -0.994223 |
| C O | -0.100671 | 0.758068  | -1.803230 |
| C O | -0.705954 | -1.783052 | -0.695017 |
| C O | -2.730281 | -0.830367 | 0.451240  |
| C O | -1.957112 | 1.830291  | -0.526440 |
| H O | 0.244272  | 1.748117  | -2.086446 |
| H O | 0.334190  | -0.063695 | -2.353355 |
| H O | -1.017083 | -2.739003 | -0.277966 |
| H O | -0.171779 | -1.887826 | -1.634822 |

|     |           |           |           |
|-----|-----------|-----------|-----------|
| H O | -3.673366 | -0.658731 | -0.086710 |
| H O | -2.710666 | -0.109619 | 1.277692  |
| H O | -2.776323 | -1.835441 | 0.879956  |
| H O | -1.927009 | 1.949350  | 0.563484  |
| H O | -3.015278 | 1.773008  | -0.811918 |
| H O | -1.542420 | 2.739003  | -0.970723 |
| C O | 1.846149  | -0.468165 | -0.434062 |
| C O | 1.022923  | -1.356922 | 0.297632  |
| C O | 1.750435  | 0.571333  | 0.606000  |
| C O | 0.810315  | -0.346880 | 1.438206  |
| O O | 2.288554  | 1.639182  | 0.819744  |
| C O | 2.789019  | -0.650011 | -1.578695 |
| H O | 1.207851  | -2.419429 | 0.435543  |
| H O | -0.217283 | 0.012311  | 1.570399  |
| H O | 1.221814  | -0.626318 | 2.414924  |
| H O | 2.329273  | -1.193806 | -2.414924 |
| H O | 3.673366  | -1.227806 | -1.274696 |
| H O | 3.139299  | 0.318930  | -1.948549 |

#### TS-43+DMB

B3LYP/6-31G(d) Geometry

|     |           |           |           |
|-----|-----------|-----------|-----------|
| C O | 1.294099  | -0.989344 | -0.087293 |
| C O | 1.563239  | 0.300080  | 0.462496  |
| C O | 0.786388  | 0.780006  | 1.496517  |
| C O | 0.187530  | -1.713853 | 0.351627  |
| C O | 2.080112  | -1.474566 | -1.285942 |
| C O | 2.557263  | 1.221163  | -0.215333 |
| H O | 0.890840  | 1.808676  | 1.829503  |
| H O | 0.293868  | 0.116427  | 2.195308  |
| H O | -0.016146 | -2.673295 | -0.118372 |
| H O | -0.129264 | -1.661910 | 1.387151  |
| H O | 3.123146  | -1.678950 | -1.007552 |
| H O | 2.115057  | -0.738906 | -2.098842 |
| H O | 1.660443  | -2.401971 | -1.686284 |
| H O | 2.274672  | 1.444560  | -1.251798 |
| H O | 3.558470  | 0.772886  | -0.245287 |
| H O | 2.635183  | 2.172569  | 0.317386  |
| C O | -1.451678 | 0.687826  | 0.610264  |
| C O | -1.545513 | -0.518673 | -0.128338 |
| C O | -1.226678 | 1.493547  | -0.602932 |
| C O | -1.255056 | 0.200230  | -1.464189 |
| O O | -1.154089 | 2.673295  | -0.873323 |
| C O | -2.561357 | -1.618833 | 0.062447  |
| H O | -1.835792 | 0.960750  | 1.589487  |
| H O | -0.321768 | -0.070882 | -1.969917 |
| H O | -2.073984 | 0.194331  | -2.195308 |
| H O | -3.558470 | -1.251764 | -0.217891 |
| H O | -2.614594 | -1.944175 | 1.107514  |
| H O | -2.350000 | -2.495609 | -0.557831 |

#### TS-44+DMB

B3LYP/6-31G(d) Geometry

|     |           |           |           |
|-----|-----------|-----------|-----------|
| C O | 1.041028  | -1.458606 | -0.101198 |
| C O | 1.620789  | -0.343799 | 0.573673  |
| C O | 0.906543  | 0.304726  | 1.575859  |
| C O | -0.239441 | -1.875616 | 0.223667  |
| C O | 1.743750  | -2.064127 | -1.298490 |
| C O | 2.899796  | 0.274300  | 0.053286  |
| H O | 1.315316  | 1.207851  | 2.020842  |
| H O | 0.223435  | -0.243482 | 2.214739  |
| H O | -0.721859 | -2.652881 | -0.362425 |
| H O | -0.647255 | -1.747591 | 1.217702  |
| H O | 2.666010  | -2.573488 | -0.989479 |



|     |           |           |           |
|-----|-----------|-----------|-----------|
| H O | 2.035951  | -1.312669 | -2.041898 |
| H O | 1.109526  | -2.804437 | -1.793557 |
| H O | 2.786903  | 0.657110  | -0.969239 |
| H O | 3.712468  | -0.462217 | 0.030345  |
| H O | 3.220546  | 1.107639  | 0.683299  |
| C O | -0.923083 | 1.071036  | 0.617486  |
| C O | -1.488714 | 0.060420  | -0.202685 |
| C O | -0.367565 | 1.770916  | -0.579440 |
| C O | -0.924845 | 0.656284  | -1.507222 |
| O O | 0.221775  | 2.804437  | -0.777864 |
| C O | -2.709571 | -0.640597 | -0.027159 |
| N O | -3.712468 | -1.219617 | 0.111160  |
| H O | -1.274466 | 1.474094  | 1.562177  |
| H O | -0.189326 | 0.048396  | -2.044748 |
| H O | -1.672619 | 1.032887  | -2.214739 |

#### TS-45+DMB

B3LYP/6-31G(d) Geometry

|      |           |           |           |
|------|-----------|-----------|-----------|
| C O  | -1.220900 | -0.642638 | -0.449316 |
| C O  | -0.973513 | 0.514556  | -1.270106 |
| C O  | 0.174077  | 0.618621  | -2.005066 |
| C O  | -0.240842 | -1.629071 | -0.292093 |
| C O  | -2.475646 | -0.708195 | 0.388905  |
| C O  | -1.943503 | 1.679199  | -1.228074 |
| H O  | 0.416906  | 1.540321  | -2.525627 |
| H O  | 0.816044  | -0.222566 | -2.222300 |
| H O  | -0.502517 | -2.488894 | 0.321360  |
| H O  | 0.413609  | -1.885193 | -1.120075 |
| H O  | -3.361103 | -0.815448 | -0.253460 |
| H O  | -2.637548 | 0.196206  | 0.987707  |
| H O  | -2.456148 | -1.565815 | 1.066865  |
| H O  | -2.056084 | 2.090442  | -0.217470 |
| H O  | -2.943462 | 1.375553  | -1.562438 |
| H O  | -1.606691 | 2.488894  | -1.880425 |
| C O  | 2.126912  | -0.036917 | -0.101870 |
| C O  | 1.262420  | -0.771496 | 0.731825  |
| C O  | 1.853858  | 1.258345  | 0.531864  |
| C O  | 0.850514  | 0.514915  | 1.470798  |
| O O  | 2.287519  | 2.385737  | 0.482129  |
| Cl O | 3.361103  | -0.583353 | -1.199895 |
| H O  | 1.506901  | -1.713112 | 1.213576  |
| H O  | -0.200456 | 0.803412  | 1.359235  |
| H O  | 1.140273  | 0.565118  | 2.525627  |

#### TS-46+DMB

B3LYP/6-31G(d) Geometry

|     |           |           |           |
|-----|-----------|-----------|-----------|
| C O | 1.382427  | -0.371080 | -0.794912 |
| C O | 1.142695  | 0.995473  | -0.469444 |
| C O | -0.060498 | 1.591707  | -0.840042 |
| C O | 0.454191  | -1.070488 | -1.549645 |
| C O | 2.544374  | -1.110582 | -0.165715 |
| C O | 2.095107  | 1.737521  | 0.443140  |
| H O | -0.274001 | 2.604065  | -0.507716 |
| H O | -0.563947 | 1.318688  | -1.760051 |
| H O | 0.573903  | -2.139767 | -1.699064 |
| H O | -0.157675 | -0.569615 | -2.288792 |
| H O | 2.505196  | -1.095424 | 0.930586  |
| H O | 3.500606  | -0.657190 | -0.456033 |
| H O | 2.562154  | -2.156348 | -0.482736 |
| H O | 3.056925  | 1.905817  | -0.059782 |
| H O | 2.318788  | 1.187244  | 1.365097  |
| H O | 1.694315  | 2.716125  | 0.720826  |
| C O | -1.567794 | 0.336402  | 0.186592  |

|     |           |           |           |
|-----|-----------|-----------|-----------|
| C O | -1.590919 | -0.955697 | -0.421398 |
| C O | -2.584161 | 1.328366  | 0.079213  |
| C O | -0.947591 | -0.190825 | 1.496471  |
| C O | -1.055811 | -1.581607 | 0.818131  |
| C O | -2.466415 | -1.519429 | -1.498304 |
| O O | -0.880731 | -2.716125 | 1.198143  |
| N O | -3.419551 | 2.136383  | -0.010744 |
| H O | -1.575451 | -0.099800 | 2.389331  |
| H O | 0.062336  | 0.169643  | 1.719961  |
| H O | -2.131100 | -2.518968 | -1.790556 |
| H O | -2.486335 | -0.881549 | -2.389331 |
| H O | -3.500606 | -1.605064 | -1.140081 |

#### TS-47+DMB

B3LYP/6-31G(d) Geometry

|     |           |           |           |
|-----|-----------|-----------|-----------|
| C O | -1.544517 | 0.530147  | 0.416543  |
| C O | -1.501427 | -0.874161 | 0.680906  |
| C O | -0.490702 | -1.398244 | 1.451486  |
| C O | -0.486444 | 1.349183  | 0.825356  |
| C O | -2.624525 | 1.098016  | -0.476701 |
| C O | -2.471845 | -1.806066 | -0.017303 |
| H O | -0.364741 | -2.473242 | 1.541612  |
| H O | 0.047927  | -0.803106 | 2.174903  |
| H O | -0.559098 | 2.408768  | 0.590160  |
| H O | 0.015916  | 1.159825  | 1.769240  |
| H O | -3.603917 | 1.045520  | 0.019424  |
| H O | -2.728179 | 0.553581  | -1.423268 |
| H O | -2.432270 | 2.149002  | -0.710646 |
| H O | -2.411675 | -1.729307 | -1.109900 |
| H O | -3.508720 | -1.579271 | 0.262254  |
| H O | -2.275968 | -2.847156 | 0.252766  |
| C O | 1.663953  | -0.496065 | 0.355584  |
| C O | 1.194985  | 0.723192  | -0.214839 |
| C O | 1.358305  | -1.260375 | -0.863056 |
| C O | 0.766297  | 0.015122  | -1.518335 |
| O O | 1.600672  | -2.379618 | -1.271245 |
| C O | 2.590115  | -0.777671 | 1.495111  |
| C O | 1.941296  | 2.040429  | -0.177592 |
| H O | -0.310632 | 0.001116  | -1.722881 |
| H O | 1.300010  | 0.323896  | -2.426042 |
| H O | 2.270109  | -0.290306 | 2.426042  |
| H O | 3.603917  | -0.409959 | 1.279502  |
| H O | 2.661872  | -1.854411 | 1.678110  |
| H O | 2.896939  | 1.937419  | -0.710327 |
| H O | 2.169154  | 2.351401  | 0.848326  |
| H O | 1.381211  | 2.847156  | -0.660819 |

#### TS-48+DMB

B3LYP/6-31G(d) Geometry

|     |           |           |           |
|-----|-----------|-----------|-----------|
| C O | 1.283574  | -0.618233 | 0.187041  |
| C O | 0.858239  | 0.737126  | 0.301506  |
| C O | -0.029301 | 1.099875  | 1.293571  |
| C O | 0.743422  | -1.589352 | 1.036789  |
| C O | 2.136256  | -1.043090 | -0.988437 |
| C O | 1.232614  | 1.741740  | -0.769414 |
| H O | -0.477376 | 2.089238  | 1.298906  |
| H O | -0.093403 | 0.559946  | 2.228398  |
| H O | 1.064964  | -2.620564 | 0.901471  |
| H O | 0.528152  | -1.341054 | 2.070782  |
| H O | 3.115408  | -0.546234 | -0.960635 |
| H O | 1.686593  | -0.784708 | -1.956021 |
| H O | 2.316043  | -2.121926 | -0.978044 |
| H O | 0.937134  | 1.417045  | -1.775255 |



|     |           |           |           |
|-----|-----------|-----------|-----------|
| H O | 2.318550  | 1.900897  | -0.796785 |
| H O | 0.761702  | 2.709990  | -0.579858 |
| C O | -1.896295 | -0.458757 | 0.954939  |
| C O | -1.298304 | -1.689805 | 0.643508  |
| C O | -2.398735 | 0.203749  | -0.259158 |
| O O | -3.115408 | 1.189692  | -0.331439 |
| C O | -1.886191 | -0.617590 | -1.456231 |
| C O | -1.469000 | -1.972596 | -0.853808 |
| H O | -2.258460 | -0.172936 | 1.935687  |
| H O | -1.370963 | -2.525178 | 1.335522  |
| H O | -1.032657 | -0.089699 | -1.900417 |
| H O | -2.657545 | -0.688204 | -2.228398 |
| H O | -0.573185 | -2.396239 | -1.318192 |
| H O | -2.272475 | -2.709990 | -0.983834 |

#### TS-49+DMB

B3LYP/6-31G(d) Geometry

|     |           |           |           |
|-----|-----------|-----------|-----------|
| C O | -1.488023 | -0.681450 | -0.594531 |
| C O | -1.071611 | 0.679054  | -0.698143 |
| C O | 0.045942  | 1.007714  | -1.430578 |
| C O | -0.696176 | -1.699219 | -1.152899 |
| C O | -2.653341 | -1.045182 | 0.297495  |
| C O | -1.769336 | 1.746688  | 0.121142  |
| H O | 0.456242  | 2.012714  | -1.395628 |
| H O | 0.409918  | 0.385911  | -2.234830 |
| H O | -1.057179 | -2.720472 | -1.040366 |
| H O | -0.213094 | -1.532880 | -2.112319 |
| H O | -3.587197 | -0.607293 | -0.081588 |
| H O | -2.536165 | -0.675921 | 1.324906  |
| H O | -2.795223 | -2.128738 | 0.343242  |
| H O | -1.767714 | 1.521149  | 1.195258  |
| H O | -2.820841 | 1.847862  | -0.177196 |
| H O | -1.291667 | 2.720472  | -0.016754 |
| C O | 1.856322  | -0.643178 | -0.553959 |
| C O | 1.059412  | -1.744933 | -0.181124 |
| C O | 2.056425  | 0.256607  | 0.593568  |
| O O | 2.825270  | 1.207251  | 0.653590  |
| C O | 2.728326  | -0.561019 | -1.771372 |
| C O | 1.184727  | -0.262796 | 1.747915  |
| C O | 0.799573  | -1.695576 | 1.329707  |
| H O | 1.277259  | -2.718214 | -0.619610 |
| H O | 3.123368  | 0.452952  | -1.884302 |
| H O | 2.196118  | -0.841113 | -2.690342 |
| H O | 3.587197  | -1.241584 | -1.685469 |
| H O | 0.307154  | 0.386113  | 1.854754  |
| H O | 1.737953  | -0.210774 | 2.690342  |
| H O | -0.227718 | -1.961871 | 1.596453  |
| H O | 1.454963  | -2.424539 | 1.824072  |

#### TS-50+DMB

B3LYP/6-31G(d) Geometry

|     |           |           |           |
|-----|-----------|-----------|-----------|
| C O | -1.329031 | -0.971415 | -0.110945 |
| C O | -1.525156 | 0.320640  | -0.671654 |
| C O | -0.689711 | 0.756188  | -1.685789 |
| C O | -0.266173 | -1.761003 | -0.557587 |
| C O | -2.126749 | -1.399798 | 1.101988  |
| C O | -2.494580 | 1.292984  | -0.031742 |
| H O | -0.719965 | 1.790991  | -2.014944 |
| H O | -0.248412 | 0.063775  | -2.390932 |
| H O | -0.111745 | -2.726945 | -0.081164 |
| H O | 0.009509  | -1.748638 | -1.606237 |
| H O | -3.192339 | -1.495025 | 0.852966  |
| H O | -2.066027 | -0.681270 | 1.929257  |

|     |           |           |           |
|-----|-----------|-----------|-----------|
| H O | -1.790072 | -2.371613 | 1.474600  |
| H O | -2.290802 | 1.453540  | 1.034924  |
| H O | -3.526286 | 0.924115  | -0.102721 |
| H O | -2.456681 | 2.267036  | -0.526693 |
| C O | 1.480089  | 0.522423  | -0.767460 |
| C O | 1.566269  | -0.740809 | -0.145164 |
| C O | 1.327378  | 1.596431  | 0.228164  |
| O O | 1.427652  | 2.800063  | 0.050765  |
| C O | 2.479597  | -1.820449 | -0.695509 |
| C O | 1.052903  | 0.911327  | 1.576935  |
| C O | 1.542595  | -0.533491 | 1.379116  |
| H O | 1.881517  | 0.740800  | -1.751599 |
| H O | 3.526286  | -1.568368 | -0.476561 |
| H O | 2.386770  | -1.919157 | -1.782524 |
| H O | 2.280585  | -2.800063 | -0.246988 |
| H O | -0.026546 | 0.949277  | 1.770335  |
| H O | 1.547158  | 1.449112  | 2.390932  |
| H O | 0.937252  | -1.277893 | 1.905833  |
| H O | 2.569946  | -0.638504 | 1.757495  |

#### TS-51+DMB

B3LYP/6-31G(d) Geometry

|     |           |           |           |
|-----|-----------|-----------|-----------|
| C O | -1.034712 | -1.617777 | -0.014280 |
| C O | -1.559422 | -0.522276 | -0.752609 |
| C O | -0.765372 | 0.091144  | -1.722936 |
| C O | 0.250975  | -2.070621 | -0.277681 |
| C O | -1.792338 | -2.159964 | 1.179905  |
| C O | -2.864018 | 0.121526  | -0.339537 |
| H O | -1.124957 | 0.993907  | -2.209615 |
| H O | -0.085255 | -0.500818 | -2.325030 |
| H O | 0.697033  | -2.833502 | 0.355117  |
| H O | 0.678024  | -2.012895 | -1.269992 |
| H O | -2.742253 | -2.611264 | 0.865284  |
| H O | -2.044251 | -1.381806 | 1.911353  |
| H O | -1.216199 | -2.934220 | 1.693988  |
| H O | -2.868304 | 0.430517  | 0.714103  |
| H O | -3.700363 | -0.579322 | -0.461379 |
| H O | -3.078913 | 1.004645  | -0.946371 |
| C O | 0.987818  | 0.823535  | -0.705276 |
| C O | 1.568271  | -0.184231 | 0.099005  |
| C O | 0.353590  | 1.845041  | 0.175131  |
| O O | -0.065627 | 2.934220  | -0.163884 |
| C O | 2.744475  | -0.881073 | -0.312395 |
| C O | 0.333413  | 1.274600  | 1.599995  |
| C O | 1.352986  | 0.121838  | 1.592291  |
| N O | 3.700363  | -1.461835 | -0.640923 |
| H O | 1.412965  | 1.130756  | -1.654304 |
| H O | -0.682466 | 0.920044  | 1.814188  |
| H O | 0.557509  | 2.061762  | 2.325030  |
| H O | 1.024130  | -0.751079 | 2.161456  |
| H O | 2.306581  | 0.446330  | 2.027255  |

#### TS-52+DMB

B3LYP/6-31G(d) Geometry

|     |           |           |           |
|-----|-----------|-----------|-----------|
| C O | -1.154768 | -0.618088 | -0.563683 |
| C O | -0.839378 | 0.470476  | -1.435872 |
| C O | 0.348541  | 0.487694  | -2.123346 |
| C O | -0.205187 | -1.628474 | -0.318056 |
| C O | -2.425908 | -0.580796 | 0.251259  |
| C O | -1.758939 | 1.674193  | -1.498837 |
| H O | 0.660854  | 1.373320  | -2.669258 |
| H O | 0.931213  | -0.401201 | -2.312469 |
| H O | -0.524758 | -2.439790 | 0.334486  |

|      |           |           |           |
|------|-----------|-----------|-----------|
| H O  | 0.419370  | -1.978803 | -1.136290 |
| H O  | -3.307649 | -0.644545 | -0.401776 |
| H O  | -2.537368 | 0.348243  | 0.825296  |
| H O  | -2.474503 | -1.419917 | 0.950709  |
| H O  | -1.914926 | 2.134974  | -0.515051 |
| H O  | -2.750631 | 1.394404  | -1.876473 |
| H O  | -1.355235 | 2.439790  | -2.166669 |
| C O  | 2.141731  | -0.122236 | -0.201093 |
| C O  | 1.309232  | -0.858653 | 0.662880  |
| C O  | 2.192581  | 1.309175  | 0.111645  |
| O O  | 2.934901  | 2.158457  | -0.350522 |
| Cl O | 3.307649  | -0.880061 | -1.254609 |
| C O  | 1.150319  | 1.521010  | 1.224021  |
| C O  | 0.829781  | 0.107072  | 1.756350  |
| H O  | 1.641080  | -1.846747 | 0.974860  |
| H O  | 0.267836  | 2.012239  | 0.799264  |
| H O  | 1.557801  | 2.191402  | 1.986293  |
| H O  | -0.226168 | -0.027590 | 2.007532  |
| H O  | 1.404337  | -0.092411 | 2.669258  |

#### TS-53+DMB

B3LYP/6-31G(d) Geometry

|     |           |           |           |
|-----|-----------|-----------|-----------|
| C O | -1.194435 | -1.224438 | -0.641250 |
| C O | -1.386799 | 0.107399  | -1.091247 |
| C O | -0.382704 | 0.728657  | -1.826511 |
| C O | 0.011681  | -1.872738 | -0.917754 |
| C O | -2.189234 | -1.860289 | 0.305929  |
| C O | -2.578822 | 0.911601  | -0.619181 |
| H O | -0.460976 | 1.786431  | -2.061654 |
| H O | 0.235213  | 0.157971  | -2.507440 |
| H O | 0.188877  | -2.859157 | -0.496170 |
| H O | 0.527920  | -1.705267 | -1.856032 |
| H O | -3.170432 | -1.967687 | -0.174647 |
| H O | -2.351512 | -1.264633 | 1.213438  |
| H O | -1.862388 | -2.858009 | 0.611538  |
| H O | -2.694454 | 0.900876  | 0.472166  |
| H O | -3.510193 | 0.504799  | -1.034871 |
| H O | -2.502344 | 1.954122  | -0.939100 |
| C O | 1.542536  | 0.633854  | -0.593317 |
| C O | 1.549528  | -0.639980 | 0.041845  |
| C O | 1.058267  | 1.650526  | 0.380069  |
| O O | 1.118596  | 2.859157  | 0.239895  |
| C O | 2.484138  | 1.042914  | -1.695129 |
| C O | 2.588004  | -1.581193 | -0.261276 |
| C O | 0.519356  | 0.913892  | 1.610978  |
| C O | 1.102553  | -0.506579 | 1.512069  |
| N O | 3.426534  | -2.352603 | -0.504105 |
| H O | 2.209067  | 2.028851  | -2.078823 |
| H O | 3.510193  | 1.109903  | -1.311318 |
| H O | 2.498024  | 0.323784  | -2.521047 |
| H O | -0.576165 | 0.913511  | 1.573448  |
| H O | 0.808935  | 1.446443  | 2.521047  |
| H O | 1.983130  | -0.606048 | 2.158117  |
| H O | 0.398039  | -1.287362 | 1.809148  |

#### TS-54+DMB

B3LYP/6-31G(d) Geometry

|     |          |           |           |
|-----|----------|-----------|-----------|
| C O | 1.519827 | 0.453929  | -0.625696 |
| C O | 1.451557 | -0.930908 | -0.944959 |
| C O | 0.398425 | -1.407567 | -1.697613 |
| C O | 0.472312 | 1.306354  | -1.013584 |
| C O | 2.599944 | 0.964502  | 0.301528  |
| C O | 2.433148 | -1.905516 | -0.325939 |

|     |           |           |           |
|-----|-----------|-----------|-----------|
| H O | 0.241242  | -2.475867 | -1.814912 |
| H O | -0.126344 | -0.782192 | -2.404678 |
| H O | 0.569866  | 2.357217  | -0.747183 |
| H O | 0.011120  | 1.163904  | -1.987145 |
| H O | 3.593311  | 0.846485  | -0.153110 |
| H O | 2.633190  | 0.424906  | 1.257029  |
| H O | 2.464809  | 2.027665  | 0.520068  |
| H O | 2.450626  | -1.850378 | 0.770098  |
| H O | 3.456543  | -1.701090 | -0.666751 |
| H O | 2.191787  | -2.934925 | -0.604366 |
| C O | -1.657981 | -0.489059 | -0.541195 |
| C O | -1.250189 | 0.784279  | -0.059003 |
| C O | -1.482865 | -1.518016 | 0.497464  |
| O O | -1.919320 | -2.661555 | 0.477461  |
| C O | -2.588612 | -0.724347 | -1.694815 |
| C O | -0.720867 | -0.873000 | 1.663226  |
| C O | -0.884601 | 0.638318  | 1.429661  |
| C O | -2.049738 | 2.023497  | -0.436540 |
| H O | -2.685832 | -1.798231 | -1.878367 |
| H O | -2.257600 | -0.233689 | -2.619671 |
| H O | -3.593311 | -0.333684 | -1.476159 |
| H O | 0.330318  | -1.181288 | 1.617543  |
| H O | -1.119651 | -1.223257 | 2.619671  |
| H O | -0.003658 | 1.223886  | 1.711207  |
| H O | -1.723163 | 1.021506  | 2.028341  |
| H O | -3.064002 | 1.951768  | -0.020685 |
| H O | -2.146870 | 2.143212  | -1.520462 |
| H O | -1.594275 | 2.934925  | -0.034485 |

#### TS-55+DMB

B3LYP/6-31G(d) Geometry

|     |           |           |           |
|-----|-----------|-----------|-----------|
| C O | -0.784635 | -0.711809 | 0.048326  |
| C O | -0.784773 | 0.711845  | 0.048350  |
| C O | -0.134048 | 1.401290  | 1.065373  |
| C O | -0.133781 | -1.401162 | 1.065329  |
| C O | -1.266161 | -1.465375 | -1.171941 |
| C O | -1.266440 | 1.465362  | -1.171892 |
| H O | -0.034409 | 2.481197  | 1.000642  |
| H O | -0.072581 | 0.998646  | 2.069347  |
| H O | -0.033924 | -2.481046 | 1.000557  |
| H O | -0.072398 | -0.998544 | 2.069319  |
| H O | -0.698029 | -1.191596 | -2.069347 |
| H O | -2.320501 | -1.243630 | -1.379222 |
| H O | -1.171071 | -2.544905 | -1.032446 |
| H O | -2.320728 | 1.243401  | -1.379200 |
| H O | -0.698236 | 1.191747  | -2.069304 |
| H O | -1.171574 | 2.544905  | -1.032350 |
| C O | 1.998786  | 0.698002  | 0.878334  |
| C O | 1.998929  | -0.697437 | 0.878342  |
| C O | 2.175632  | -1.142485 | -0.521514 |
| C O | 2.175386  | 1.143065  | -0.521533 |
| O O | 2.134342  | 0.000279  | -1.332037 |
| O O | 2.320728  | -2.239797 | -0.988939 |
| O O | 2.320235  | 2.240401  | -0.988977 |
| H O | 2.300097  | 1.341006  | 1.694533  |
| H O | 2.300359  | -1.340369 | 1.694553  |

#### TS-56+DMB

B3LYP/6-31G(d) Geometry

|     |           |           |           |
|-----|-----------|-----------|-----------|
| C O | 0.685806  | 0.680295  | 0.208936  |
| C O | 1.178059  | -0.639185 | -0.009024 |
| C O | 0.724633  | -1.688227 | 0.792004  |
| C O | -0.165849 | 0.930019  | 1.266063  |

|     |           |           |           |
|-----|-----------|-----------|-----------|
| C O | 0.900971  | 1.747800  | -0.843276 |
| C O | 1.984455  | -0.942074 | -1.252811 |
| H O | 1.074734  | -2.695673 | 0.573508  |
| H O | 0.508219  | -1.524419 | 1.842012  |
| H O | -0.661911 | 1.891995  | 1.354749  |
| H O | -0.141012 | 0.337027  | 2.171604  |
| H O | 0.455966  | 1.461883  | -1.804751 |
| H O | 1.969333  | 1.925219  | -1.019552 |
| H O | 0.450547  | 2.695673  | -0.538207 |
| H O | 2.934717  | -0.391900 | -1.247135 |
| H O | 1.460919  | -0.648299 | -2.171604 |
| H O | 2.223618  | -2.007363 | -1.322112 |
| C O | -1.367418 | -1.799048 | 0.432449  |
| C O | -1.955646 | -0.582146 | 0.779620  |
| C O | -2.360008 | 0.127590  | -0.446208 |
| O O | -2.934717 | 1.178967  | -0.597349 |
| C O | -1.524098 | -1.927891 | -1.073914 |
| O O | -1.937280 | -0.631446 | -1.526123 |
| H O | -1.448511 | -2.685532 | 1.053011  |
| H O | -2.390170 | -0.324579 | 1.735389  |
| H O | -2.308202 | -2.656273 | -1.325333 |
| H O | -0.614250 | -2.201533 | -1.613131 |

#### TS-57+DMB

B3LYP/6-31G(d) Geometry

|     |           |           |           |
|-----|-----------|-----------|-----------|
| C O | -1.006159 | 1.116073  | -0.125363 |
| C O | -1.533100 | -0.187473 | -0.349044 |
| C O | -1.042894 | -0.959683 | -1.409866 |
| C O | -0.083238 | 1.647313  | -1.003840 |
| C O | -1.304967 | 1.840863  | 1.171512  |
| C O | -2.447163 | -0.820583 | 0.676662  |
| H O | -1.444453 | -1.963903 | -1.535192 |
| H O | -0.797959 | -0.480089 | -2.351890 |
| H O | 0.446880  | 2.564564  | -0.765363 |
| H O | -0.065759 | 1.368034  | -2.048106 |
| H O | -1.015116 | 1.258890  | 2.056611  |
| H O | -2.378468 | 2.047646  | 1.269662  |
| H O | -0.779388 | 2.798672  | 1.214568  |
| H O | -3.386253 | -0.257251 | 0.761245  |
| H O | -2.010253 | -0.844833 | 1.683617  |
| H O | -2.704578 | -1.846420 | 0.397899  |
| C O | 0.979079  | -1.317756 | -1.066250 |
| C O | 1.654685  | -0.084554 | -1.148034 |
| C O | 2.461955  | 0.470931  | -0.051920 |
| O O | 3.197605  | 1.441020  | -0.209056 |
| C O | 1.071136  | -2.122691 | 0.223294  |
| C O | 2.446038  | -0.279024 | 1.281940  |
| C O | 1.253300  | -1.226407 | 1.454643  |
| H O | 0.981677  | -1.921833 | -1.972914 |
| H O | 1.901228  | 0.324879  | -2.123816 |
| H O | 1.937140  | -2.798672 | 0.140177  |
| H O | 0.193108  | -2.768026 | 0.343071  |
| H O | 2.507364  | 0.457734  | 2.090288  |
| H O | 3.386253  | -0.850086 | 1.319704  |
| H O | 1.386788  | -1.843240 | 2.351890  |
| H O | 0.341837  | -0.640000 | 1.612264  |

#### TS-58+DMB

B3LYP/6-31G(d) Geometry

|     |           |           |           |
|-----|-----------|-----------|-----------|
| C O | -0.974538 | -1.321310 | -0.178616 |
| C O | -1.417760 | -0.234721 | 0.630974  |
| C O | -0.646856 | 0.177142  | 1.734380  |
| C O | 0.152655  | -2.032227 | 0.165986  |

|     |           |           |           |
|-----|-----------|-----------|-----------|
| C O | -1.656362 | -1.599931 | -1.503432 |
| C O | -2.592606 | 0.606716  | 0.187874  |
| H O | -1.041862 | 1.006267  | 2.320129  |
| H O | -0.179427 | -0.581064 | 2.357798  |
| H O | 0.582024  | -2.758193 | -0.518328 |
| H O | 0.512242  | -2.088871 | 1.181947  |
| H O | -1.654193 | -0.727981 | -2.170772 |
| H O | -2.707477 | -1.878040 | -1.353704 |
| H O | -1.168705 | -2.425302 | -2.029383 |
| H O | -3.514218 | 0.009051  | 0.161316  |
| H O | -2.466204 | 1.020795  | -0.821494 |
| H O | -2.762815 | 1.440951  | 0.874312  |
| C O | 1.102106  | 0.901509  | 1.116640  |
| C O | 1.937974  | -0.175156 | 0.729325  |
| C O | 2.448600  | -0.311511 | -0.645191 |
| O O | 3.302573  | -1.146298 | -0.944363 |
| C O | 0.821056  | 2.020141  | 0.120643  |
| C O | 2.005437  | 0.714822  | -1.690999 |
| C O | 0.751883  | 1.514373  | -1.324262 |
| C O | 2.641097  | -0.986864 | 1.788880  |
| H O | 1.292463  | 1.266963  | 2.128206  |
| H O | 1.634135  | 2.758193  | 0.204600  |
| H O | -0.100228 | 2.551809  | 0.387492  |
| H O | 1.893643  | 0.194376  | -2.648506 |
| H O | 2.860782  | 1.395585  | -1.818250 |
| H O | 0.628400  | 2.360226  | -2.012195 |
| H O | -0.133548 | 0.883399  | -1.445469 |
| H O | 1.988601  | -1.191386 | 2.648506  |
| H O | 3.514218  | -0.443613 | 2.177879  |
| H O | 3.007028  | -1.929905 | 1.377381  |

#### TS-59+DMB

B3LYP/6-31G(d) Geometry

|     |           |           |           |
|-----|-----------|-----------|-----------|
| C O | 1.059988  | -1.020244 | -0.972008 |
| C O | 1.292181  | 0.299693  | -0.500945 |
| C O | 0.517115  | 1.351965  | -0.998682 |
| C O | 0.123364  | -1.231268 | -1.970284 |
| C O | 1.662234  | -2.205422 | -0.246117 |
| C O | 2.217931  | 0.537673  | 0.672378  |
| H O | 0.679753  | 2.346153  | -0.586927 |
| H O | 0.237823  | 1.361488  | -2.046016 |
| H O | -0.189844 | -2.237813 | -2.231210 |
| H O | -0.055814 | -0.487998 | -2.736273 |
| H O | 1.391509  | -2.229580 | 0.818269  |
| H O | 2.758786  | -2.179651 | -0.289922 |
| H O | 1.336181  | -3.147736 | -0.694811 |
| H O | 3.256916  | 0.311443  | 0.396394  |
| H O | 1.984662  | -0.092258 | 1.540053  |
| H O | 2.185809  | 1.582084  | 0.996058  |
| C O | -1.554294 | 0.986551  | -0.550482 |
| C O | -1.864106 | -0.252246 | -1.161790 |
| C O | -2.302637 | -1.445312 | -0.415982 |
| O O | -2.794721 | -2.418225 | -0.978953 |
| C O | -1.609609 | 1.053171  | 0.974967  |
| C O | -2.225872 | -1.394211 | 1.110488  |
| C O | -1.311611 | -0.290033 | 1.649720  |
| C O | -2.068433 | 2.242726  | -1.242793 |
| H O | -2.217692 | -0.245409 | -2.190450 |
| H O | -2.626113 | 1.375502  | 1.257973  |
| H O | -0.935957 | 1.832843  | 1.350369  |
| H O | -1.935927 | -2.386556 | 1.472994  |
| H O | -3.256916 | -1.233192 | 1.460415  |
| H O | -1.429912 | -0.196794 | 2.736273  |

|     |           |           |           |
|-----|-----------|-----------|-----------|
| H O | -0.266483 | -0.561452 | 1.472371  |
| H O | -1.956555 | 2.182402  | -2.330664 |
| H O | -1.557529 | 3.147736  | -0.895280 |
| H O | -3.139062 | 2.371566  | -1.031440 |

### TS-60+DMB

B3LYP/6-31G(d) Geometry

|     |           |           |           |
|-----|-----------|-----------|-----------|
| C O | -1.408980 | -0.188968 | -1.169615 |
| C O | -1.141105 | -1.373328 | -0.435078 |
| C O | 0.031907  | -2.077671 | -0.678771 |
| C O | -0.491071 | 0.236574  | -2.133822 |
| C O | -2.536029 | 0.727561  | -0.750964 |
| C O | -2.023714 | -1.765395 | 0.731730  |
| H O | 0.300580  | -2.917733 | -0.043200 |
| H O | 0.474154  | -2.110853 | -1.665220 |
| H O | -0.637740 | 1.193556  | -2.626255 |
| H O | 0.027233  | -0.497992 | -2.740228 |
| H O | -2.431253 | 1.073698  | 0.287063  |
| H O | -3.503317 | 0.212437  | -0.809713 |
| H O | -2.589185 | 1.610138  | -1.393602 |
| H O | -3.025702 | -2.044530 | 0.380412  |
| H O | -2.162646 | -0.953052 | 1.455758  |
| H O | -1.611702 | -2.626868 | 1.264504  |
| C O | 1.722606  | -0.500872 | -0.296244 |
| C O | 1.373464  | 0.586457  | -1.144121 |
| C O | 1.093326  | 1.943173  | -0.584378 |
| O O | 1.000207  | 2.917733  | -1.314713 |
| C O | 1.681901  | -0.333744 | 1.224447  |
| C O | 1.006012  | 2.082641  | 0.931691  |
| C O | 0.706256  | 0.766004  | 1.655494  |
| C O | 2.708649  | -1.419919 | -0.786107 |
| N O | 3.503317  | -2.179079 | -1.174792 |
| H O | 1.855642  | 0.636391  | -2.116210 |
| H O | 2.694583  | -0.067358 | 1.565034  |
| H O | 1.438461  | -1.283722 | 1.710033  |
| H O | 0.274047  | 2.863831  | 1.162047  |
| H O | 1.982692  | 2.472025  | 1.257820  |
| H O | 0.770717  | 0.909661  | 2.740228  |
| H O | -0.320617 | 0.451802  | 1.442390  |

### TS-61+DMB

B3LYP/6-31G(d) Geometry

|     |           |           |           |
|-----|-----------|-----------|-----------|
| C O | 0.847885  | -1.002208 | 0.913576  |
| C O | 1.169993  | -1.265034 | -0.454132 |
| C O | 0.217036  | -1.858840 | -1.309702 |
| C O | -0.357427 | -1.402233 | 1.435100  |
| C O | 1.785588  | -0.160847 | 1.757258  |
| C O | 2.456009  | -0.727843 | -1.034647 |
| H O | 0.558018  | -2.070076 | -2.322671 |
| H O | -0.411353 | -2.654754 | -0.915638 |
| H O | -0.667821 | -1.079747 | 2.424942  |
| H O | -0.962443 | -2.177923 | 0.992039  |
| H O | 1.969657  | 0.829459  | 1.320727  |
| H O | 2.764401  | -0.645628 | 1.862111  |
| H O | 1.380582  | -0.013829 | 2.762024  |
| H O | 3.326128  | -1.168457 | -0.528890 |
| H O | 2.552828  | 0.360068  | -0.917310 |
| H O | 2.540793  | -0.961073 | -2.099489 |
| C O | -1.267406 | -0.653620 | -1.627634 |
| C O | -2.135351 | -0.664946 | -0.510451 |
| C O | -2.469279 | 0.490536  | 0.327623  |
| O O | -3.326128 | 0.472065  | 1.202808  |
| C O | -0.738797 | 0.707421  | -2.074865 |

|      |           |           |           |
|------|-----------|-----------|-----------|
| C O  | -1.774924 | 1.807812  | -0.043321 |
| C O  | -0.515084 | 1.671189  | -0.904621 |
| Cl O | -3.168006 | -2.085191 | -0.328276 |
| H O  | -1.611742 | -1.272648 | -2.456026 |
| H O  | -1.481153 | 1.140129  | -2.762024 |
| H O  | 0.182208  | 0.582495  | -2.656152 |
| H O  | -1.575311 | 2.349472  | 0.887190  |
| H O  | -2.534484 | 2.395577  | -0.579806 |
| H O  | -0.214981 | 2.654754  | -1.286747 |
| H O  | 0.313849  | 1.311393  | -0.287711 |

### TS-62+DMB

B3LYP/6-31G(d) Geometry

|     |           |           |           |
|-----|-----------|-----------|-----------|
| C O | 1.460735  | -0.285219 | -1.398823 |
| C O | 1.434350  | 1.035725  | -0.887902 |
| C O | 0.289365  | 1.818806  | -1.081830 |
| C O | 0.370596  | -0.752995 | -2.126587 |
| C O | 2.561936  | -1.241345 | -0.994495 |
| C O | 2.533324  | 1.524576  | 0.029887  |
| H O | 0.243926  | 2.802431  | -0.620280 |
| H O | -0.259068 | 1.758523  | -2.015148 |
| H O | 0.312919  | -1.800953 | -2.406319 |
| H O | -0.180679 | -0.084340 | -2.773519 |
| H O | 2.658972  | -1.339274 | 0.095091  |
| H O | 3.535315  | -0.893761 | -1.364075 |
| H O | 2.388869  | -2.238666 | -1.407554 |
| H O | 3.492153  | 1.566990  | -0.503348 |
| H O | 2.688851  | 0.868939  | 0.896376  |
| H O | 2.320240  | 2.530426  | 0.402027  |
| C O | -1.351595 | 0.764847  | -0.131309 |
| C O | -1.543930 | -0.444671 | -0.876629 |
| C O | -1.392289 | -1.768889 | -0.202782 |
| O O | -1.758333 | -2.802431 | -0.748963 |
| C O | -0.959307 | 0.698332  | 1.351737  |
| C O | -0.869128 | -1.816570 | 1.230267  |
| C O | -0.144633 | -0.551406 | 1.691644  |
| C O | -2.495929 | -0.444484 | -2.056622 |
| C O | -2.269710 | 1.843456  | -0.409511 |
| N O | -2.998735 | 2.730104  | -0.605584 |
| H O | -1.886431 | 0.692712  | 1.944199  |
| H O | -0.419907 | 1.606915  | 1.638293  |
| H O | -0.248131 | -2.712824 | 1.333183  |
| H O | -1.754801 | -1.990325 | 1.860021  |
| H O | 0.029713  | -0.589636 | 2.773519  |
| H O | 0.839455  | -0.492949 | 1.220157  |
| H O | -2.350033 | 0.428466  | -2.701595 |
| H O | -3.535315 | -0.411793 | -1.705679 |
| H O | -2.375309 | -1.357637 | -2.641364 |

### TS-63+DMB

B3LYP/6-31G(d) Geometry

|     |           |           |           |
|-----|-----------|-----------|-----------|
| C O | 1.251305  | -1.043863 | -1.215602 |
| C O | 1.470027  | 0.313713  | -0.853578 |
| C O | 0.500540  | 1.283248  | -1.175196 |
| C O | 0.140631  | -1.387134 | -1.958911 |
| C O | 2.138122  | -2.133230 | -0.646561 |
| C O | 2.623559  | 0.678726  | 0.052854  |
| H O | 0.725594  | 2.307758  | -0.883773 |
| H O | 0.014771  | 1.227728  | -2.146157 |
| H O | -0.129988 | -2.429122 | -2.103059 |
| H O | -0.326266 | -0.693339 | -2.640893 |
| H O | 2.160012  | -2.129851 | 0.451241  |
| H O | 3.176055  | -2.009390 | -0.981305 |

|     |           |           |           |
|-----|-----------|-----------|-----------|
| H O | 1.802425  | -3.121783 | -0.971642 |
| H O | 3.585223  | 0.450436  | -0.426692 |
| H O | 2.613910  | 0.124112  | 1.000970  |
| H O | 2.620273  | 1.746593  | 0.289569  |
| C O | -1.234671 | 0.947823  | -0.200064 |
| C O | -1.825098 | -0.205362 | -0.806186 |
| C O | -2.058272 | -1.457332 | -0.057763 |
| O O | -2.745928 | -2.371257 | -0.513822 |
| C O | -0.871364 | 0.860092  | 1.285686  |
| C O | -1.547889 | -1.563685 | 1.379606  |
| C O | -0.475645 | -0.540911 | 1.755882  |
| C O | -1.871508 | 2.302072  | -0.532372 |
| C O | -2.635802 | -0.060273 | -2.072237 |
| H O | -1.754125 | 1.188024  | 1.858807  |
| H O | -0.080045 | 1.583790  | 1.517415  |
| H O | -1.212862 | -2.593783 | 1.542714  |
| H O | -2.433774 | -1.431558 | 2.019153  |
| H O | -0.318845 | -0.537028 | 2.841957  |
| H O | 0.479041  | -0.824278 | 1.306315  |
| H O | -2.895376 | 2.337359  | -0.136664 |
| H O | -1.927797 | 2.497236  | -1.606304 |
| H O | -1.312117 | 3.121783  | -0.068710 |
| H O | -2.114874 | 0.524663  | -2.841957 |
| H O | -3.585223 | 0.458525  | -1.876014 |
| H O | -2.879091 | -1.046484 | -2.471226 |

#### TS-64+DMB

B3LYP/6-31G(d) Geometry

|     |           |           |           |
|-----|-----------|-----------|-----------|
| C O | -1.214666 | -1.438097 | -0.031398 |
| C O | -0.755984 | -0.713107 | 1.225285  |
| O O | -0.894085 | -0.638561 | -1.181425 |
| C O | -2.756898 | -1.496110 | -0.146877 |
| C O | -1.862590 | 0.390195  | -1.097140 |
| C O | -0.944035 | 0.681166  | 1.226320  |
| O O | -3.096376 | -0.262271 | -0.786762 |
| C O | -1.526092 | 1.351163  | 0.059362  |
| O O | -1.832417 | 2.535042  | -0.000202 |
| H O | -0.742394 | -2.414486 | -0.155198 |
| H O | -0.924851 | -1.250101 | 2.158063  |
| H O | -3.260135 | -1.567117 | 0.823035  |
| H O | -3.073300 | -2.332367 | -0.782650 |
| H O | -1.945932 | 0.909084  | -2.053948 |
| H O | -0.956554 | 1.241946  | 2.155925  |
| C O | 1.279456  | -1.139689 | 1.344154  |
| C O | 1.844149  | -0.660455 | 0.158929  |
| C O | 1.818485  | 0.739286  | -0.121715 |
| C O | 2.240153  | -1.633605 | -0.926468 |
| C O | 1.337595  | 1.624167  | 0.815011  |
| C O | 2.114373  | 1.223161  | -1.524821 |
| H O | 1.295144  | -2.214110 | 1.520774  |
| H O | 1.353568  | -0.556518 | 2.255858  |
| H O | 1.578903  | -1.557962 | -1.798689 |
| H O | 2.211532  | -2.665742 | -0.564567 |
| H O | 3.260135  | -1.436352 | -1.280444 |
| H O | 1.167462  | 2.665742  | 0.559831  |
| H O | 1.343833  | 1.404011  | 1.874125  |
| H O | 1.437853  | 0.763718  | -2.255858 |
| H O | 3.137930  | 0.969599  | -1.828581 |
| H O | 2.007028  | 2.308903  | -1.597046 |

#### TS-65+DMB

B3LYP/6-31G(d) Geometry

|     |           |           |          |
|-----|-----------|-----------|----------|
| C O | -1.210433 | -1.560786 | 0.545663 |
|-----|-----------|-----------|----------|

|     |           |           |           |
|-----|-----------|-----------|-----------|
| C O | -1.034536 | -0.282551 | 1.352918  |
| O O | -0.837105 | -1.314005 | -0.818138 |
| C O | -2.698670 | -1.947021 | 0.368261  |
| C O | -1.932958 | -0.547931 | -1.277775 |
| C O | -1.458590 | 0.914350  | 0.729239  |
| O O | -3.100809 | -1.222854 | -0.798599 |
| C O | -1.923594 | 0.863520  | -0.662035 |
| O O | -2.409780 | 1.807483  | -1.277913 |
| C O | -1.789480 | 2.142345  | 1.537092  |
| H O | -0.599131 | -2.383625 | 0.921860  |
| H O | -1.279287 | -0.385774 | 2.412091  |
| H O | -3.322596 | -1.663502 | 1.222623  |
| H O | -2.808068 | -3.022374 | 0.180852  |
| H O | -1.943175 | -0.519492 | -2.368723 |
| H O | -1.053837 | 2.322507  | 2.332003  |
| H O | -2.768214 | 2.036844  | 2.026474  |
| H O | -1.843454 | 3.022374  | 0.891782  |
| C O | 0.932015  | -0.193856 | 1.768545  |
| C O | 1.631994  | -0.323293 | 0.558917  |
| C O | 1.526800  | 0.695383  | -0.437956 |
| C O | 2.285020  | -1.639123 | 0.211564  |
| C O | 0.840838  | 1.854351  | -0.176732 |
| C O | 2.014096  | 0.413329  | -1.843017 |
| H O | 1.053721  | -0.992049 | 2.499837  |
| H O | 0.842301  | 0.784644  | 2.232609  |
| H O | 1.763924  | -2.145202 | -0.611587 |
| H O | 2.303593  | -2.315387 | 1.071562  |
| H O | 3.322596  | -1.490942 | -0.114680 |
| H O | 0.629764  | 2.566548  | -0.968876 |
| H O | 0.663826  | 2.211595  | 0.827172  |
| H O | 1.507251  | -0.459471 | -2.271913 |
| H O | 3.090916  | 0.202970  | -1.858579 |
| H O | 1.834572  | 1.268930  | -2.499837 |

#### TS-66+DMB

B3LYP/6-31G(d) Geometry

|     |           |           |           |
|-----|-----------|-----------|-----------|
| C O | -1.300164 | -0.732522 | -0.881387 |
| C O | -0.909858 | -0.742957 | 0.597775  |
| O O | -0.718006 | 0.410807  | -1.526638 |
| C O | -2.804516 | -0.443927 | -1.113685 |
| C O | -1.535642 | 1.461847  | -1.050532 |
| C O | -0.871098 | 0.538649  | 1.196450  |
| O O | -2.879068 | 0.984630  | -1.144425 |
| C O | -1.227638 | 1.740190  | 0.431703  |
| O O | -1.369579 | 2.861006  | 0.902816  |
| C O | -1.445866 | -1.907956 | 1.418044  |
| H O | -0.960933 | -1.628820 | -1.405209 |
| H O | -3.454459 | -0.832938 | -0.324093 |
| H O | -3.133460 | -0.844756 | -2.080440 |
| H O | -1.411445 | 2.349892  | -1.673192 |
| H O | -0.960411 | 0.633233  | 2.275692  |
| H O | -1.215184 | -2.878125 | 0.963134  |
| H O | -2.536403 | -1.844769 | 1.525851  |
| H O | -1.024843 | -1.899938 | 2.428816  |
| C O | 1.097509  | -1.444596 | 0.479558  |
| C O | 1.823164  | -0.520620 | -0.276594 |
| C O | 1.953302  | 0.816439  | 0.192426  |
| C O | 2.243739  | -0.867136 | -1.685790 |
| C O | 1.436262  | 1.162567  | 1.424719  |
| C O | 2.429981  | 1.899456  | -0.750375 |
| H O | 0.984747  | -2.452356 | 0.083585  |
| H O | 1.144751  | -1.413650 | 1.562339  |
| H O | 1.684040  | -0.285998 | -2.428816 |



|     |          |           |           |
|-----|----------|-----------|-----------|
| H O | 2.087769 | -1.929408 | -1.896580 |
| H O | 3.308372 | -0.652089 | -1.843134 |
| H O | 1.378909 | 2.203647  | 1.728041  |
| H O | 1.356656 | 0.444719  | 2.231039  |
| H O | 1.798086 | 1.958929  | -1.645603 |
| H O | 3.454459 | 1.707795  | -1.093910 |
| H O | 2.421086 | 2.878125  | -0.262897 |

#### TS-67+DMB

B3LYP/6-31G(d) Geometry

|     |           |           |           |
|-----|-----------|-----------|-----------|
| C O | 1.440576  | 0.278418  | -1.085190 |
| C O | 1.130675  | 0.702988  | 0.353511  |
| O O | 0.668330  | -0.888831 | -1.396810 |
| C O | 2.872645  | -0.278835 | -1.233654 |
| C O | 1.343904  | -1.895671 | -0.666144 |
| C O | 0.850834  | -0.338379 | 1.276522  |
| O O | 2.737397  | -1.647920 | -0.829519 |
| C O | 1.004536  | -1.749954 | 0.825526  |
| O O | 0.928273  | -2.714793 | 1.565041  |
| C O | 1.766918  | 1.897120  | 0.814496  |
| N O | 2.282074  | 2.882578  | 1.165185  |
| H O | 1.204892  | 1.056180  | -1.811913 |
| H O | 3.605444  | 0.225406  | -0.597753 |
| H O | 3.201613  | -0.237211 | -2.279018 |
| H O | 1.082868  | -2.882578 | -1.053707 |
| H O | 1.070006  | -0.176967 | 2.327592  |
| C O | -0.912099 | 1.797355  | 0.037541  |
| C O | -1.731919 | 0.752770  | -0.362252 |
| C O | -1.910191 | -0.365896 | 0.497486  |
| C O | -2.240536 | 0.698750  | -1.785403 |
| C O | -1.268980 | -0.390225 | 1.734514  |
| C O | -2.562845 | -1.622187 | -0.028989 |
| H O | -0.684200 | 2.603682  | -0.655223 |
| H O | -0.790575 | 2.061190  | 1.079645  |
| H O | -1.779293 | -0.122682 | -2.346534 |
| H O | -2.032386 | 1.632708  | -2.315200 |
| H O | -3.325621 | 0.540173  | -1.810161 |
| H O | -1.319880 | -1.286172 | 2.346534  |
| H O | -1.123220 | 0.526888  | 2.294061  |
| H O | -2.050374 | -1.996851 | -0.924546 |
| H O | -3.605444 | -1.435604 | -0.316477 |
| H O | -2.560603 | -2.415673 | 0.722630  |

#### TS-68+DMB

B3LYP/6-31G(d) Geometry

|      |           |           |           |
|------|-----------|-----------|-----------|
| C O  | -1.174812 | 1.076683  | -0.915814 |
| C O  | -1.336127 | -0.386715 | -1.316242 |
| O O  | -0.718804 | 1.147625  | 0.440397  |
| C O  | -2.535074 | 1.809011  | -0.808928 |
| C O  | -1.895896 | 0.819017  | 1.153747  |
| C O  | -1.952638 | -1.187406 | -0.331621 |
| O O  | -2.934960 | 1.585163  | 0.547714  |
| C O  | -2.261544 | -0.677971 | 1.001590  |
| O O  | -2.866061 | -1.263050 | 1.887983  |
| Cl O | -2.653629 | -2.724593 | -0.818174 |
| H O  | -0.454541 | 1.599327  | -1.547975 |
| H O  | -1.682711 | -0.538403 | -2.338391 |
| H O  | -3.290612 | 1.415648  | -1.496965 |
| H O  | -2.418791 | 2.886700  | -0.973859 |
| H O  | -1.792177 | 1.096389  | 2.203748  |
| C O  | 0.466452  | -1.057251 | -1.733503 |
| C O  | 1.332119  | -0.695861 | -0.686087 |
| C O  | 1.199677  | -1.295696 | 0.610305  |

|     |           |           |           |
|-----|-----------|-----------|-----------|
| C O | 2.256369  | 0.482972  | -0.861553 |
| C O | 0.303887  | -2.307071 | 0.821129  |
| C O | 1.942887  | -0.693697 | 1.783678  |
| H O | 0.662220  | -0.601412 | -2.703368 |
| H O | 0.134268  | -2.088708 | -1.818864 |
| H O | 1.980676  | 1.314130  | -0.199625 |
| H O | 2.250582  | 0.847504  | -1.892825 |
| H O | 3.290612  | 0.212512  | -0.611073 |
| H O | 0.099910  | -2.668382 | 1.824852  |
| H O | -0.134455 | -2.886700 | 0.022163  |
| H O | 1.653938  | 0.352284  | 1.941988  |
| H O | 3.028019  | -0.710512 | 1.623922  |
| H O | 1.734546  | -1.246882 | 2.703368  |

#### TS-69+DMB

B3LYP/6-31G(d) Geometry

|     |           |           |           |
|-----|-----------|-----------|-----------|
| C O | 1.316727  | 0.302980  | -1.472135 |
| C O | 1.302804  | 0.717496  | 0.007040  |
| O O | 0.495559  | -0.857089 | -1.636675 |
| C O | 2.688970  | -0.247124 | -1.919093 |
| C O | 1.305938  | -1.868968 | -1.071883 |
| C O | 1.294040  | -0.339473 | 0.972114  |
| O O | 2.629340  | -1.630400 | -1.546757 |
| C O | 1.331900  | -1.736195 | 0.458216  |
| O O | 1.473937  | -2.720225 | 1.167597  |
| C O | 2.082237  | 1.891160  | 0.291709  |
| C O | 1.882874  | -0.127385 | 2.350100  |
| N O | 2.709513  | 2.853416  | 0.485984  |
| H O | 0.938948  | 1.092603  | -2.122562 |
| H O | 3.535583  | 0.238442  | -1.425332 |
| H O | 2.805559  | -0.168898 | -3.006523 |
| H O | 0.960048  | -2.853416 | -1.392201 |
| H O | 1.547640  | 0.813119  | 2.799463  |
| H O | 2.978171  | -0.085777 | 2.293150  |
| H O | 1.618596  | -0.958759 | 3.006523  |
| C O | -0.602929 | 1.772522  | 0.157732  |
| C O | -1.555002 | 0.823565  | -0.222299 |
| C O | -1.682220 | -0.370238 | 0.533799  |
| C O | -2.255797 | 0.956100  | -1.554512 |
| C O | -0.896230 | -0.546399 | 1.664732  |
| C O | -2.478530 | -1.530312 | -0.017454 |
| H O | -0.452193 | 2.648853  | -0.468773 |
| H O | -0.381570 | 1.949194  | 1.203998  |
| H O | -1.938492 | 0.175940  | -2.257537 |
| H O | -2.058126 | 1.929859  | -2.011735 |
| H O | -3.342588 | 0.860627  | -1.438345 |
| H O | -0.885530 | -1.504805 | 2.175450  |
| H O | -0.611785 | 0.297188  | 2.279774  |
| H O | -2.109904 | -1.835974 | -1.004675 |
| H O | -3.535583 | -1.262214 | -0.139677 |
| H O | -2.430937 | -2.395550 | 0.649160  |

#### TS-70+DMB

B3LYP/6-31G(d) Geometry

|     |           |           |           |
|-----|-----------|-----------|-----------|
| C O | -1.210740 | -1.322178 | -0.888873 |
| C O | -1.138807 | -0.759716 | 0.535100  |
| O O | -0.582377 | -0.418157 | -1.806191 |
| C O | -2.647520 | -1.352354 | -1.467172 |
| C O | -1.549731 | 0.607540  | -1.900301 |
| C O | -1.376770 | 0.646312  | 0.628410  |
| O O | -2.803956 | -0.060194 | -2.061766 |
| C O | -1.613398 | 1.422029  | -0.597709 |
| O O | -1.968979 | 2.597092  | -0.629294 |



|     |           |           |           |
|-----|-----------|-----------|-----------|
| C O | -1.787552 | -1.665924 | 1.581815  |
| C O | -1.811898 | 1.285274  | 1.922796  |
| H O | -0.708770 | -2.289609 | -0.965658 |
| H O | -3.422853 | -1.513941 | -0.712114 |
| H O | -2.738583 | -2.120569 | -2.244918 |
| H O | -1.351241 | 1.237459  | -2.769032 |
| H O | -1.522047 | -2.716646 | 1.418047  |
| H O | -2.881485 | -1.589266 | 1.545142  |
| H O | -1.480986 | -1.400255 | 2.597247  |
| H O | -1.170662 | 1.005956  | 2.769032  |
| H O | -2.835229 | 0.984114  | 2.190581  |
| H O | -1.808250 | 2.372231  | 1.816496  |
| C O | 0.780660  | -1.108071 | 1.054621  |
| C O | 1.642702  | -0.592344 | 0.070617  |
| C O | 1.695423  | 0.813453  | -0.150653 |
| C O | 2.310872  | -1.529577 | -0.905605 |
| C O | 0.992140  | 1.664615  | 0.669867  |
| C O | 2.354175  | 1.350530  | -1.402886 |
| H O | 0.791384  | -2.187732 | 1.197858  |
| H O | 0.669703  | -0.568472 | 1.991522  |
| H O | 1.894004  | -1.424074 | -1.915490 |
| H O | 2.198609  | -2.573334 | -0.597195 |
| H O | 3.385855  | -1.321017 | -0.981914 |
| H O | 0.888101  | 2.716646  | 0.421504  |
| H O | 0.728473  | 1.400700  | 1.683584  |
| H O | 1.901726  | 0.924938  | -2.306923 |
| H O | 3.422853  | 1.102583  | -1.429564 |
| H O | 2.266091  | 2.439188  | -1.457242 |

#### P-1+DMB

B3LYP/6-31G(d) Geometry

|     |           |           |           |
|-----|-----------|-----------|-----------|
| C O | 1.146466  | 0.670393  | 0.039098  |
| C O | 1.634505  | -0.583438 | -0.014674 |
| C O | 0.727528  | -1.801843 | -0.022771 |
| C O | -0.725527 | -1.514155 | 0.364201  |
| C O | -1.207837 | -0.245155 | -0.364707 |
| C O | -0.344852 | 0.959077  | 0.063922  |
| C O | -2.633419 | 0.014117  | -0.127612 |
| N O | -3.758763 | 0.219454  | 0.072941  |
| C O | 1.980228  | 1.928630  | 0.091343  |
| C O | 3.100109  | -0.940233 | -0.084735 |
| H O | 1.139134  | -2.558960 | 0.659685  |
| H O | 0.762008  | -2.267174 | -1.021267 |
| H O | -1.366587 | -2.367554 | 0.118923  |
| H O | -0.806639 | -1.349631 | 1.445836  |
| H O | -1.080783 | -0.398392 | -1.445836 |
| H O | -0.644430 | 1.279929  | 1.073006  |
| H O | -0.562317 | 1.812901  | -0.591654 |
| H O | 1.835484  | 2.532788  | -0.815449 |
| H O | 3.049684  | 1.742516  | 0.202838  |
| H O | 1.665993  | 2.558960  | 0.934956  |
| H O | 3.417434  | -1.470148 | 0.824550  |
| H O | 3.758763  | -0.080276 | -0.217777 |
| H O | 3.283361  | -1.628430 | -0.921718 |

#### P-2+DMB

B3LYP/6-31G(d) Geometry

|     |           |           |           |
|-----|-----------|-----------|-----------|
| C O | -0.826524 | 0.645359  | -0.032769 |
| C O | -1.425178 | -0.561337 | -0.033226 |
| C O | -0.625524 | -1.853741 | -0.023774 |
| C O | 0.851604  | -1.675974 | -0.383498 |
| C O | 1.434338  | -0.474642 | 0.385552  |
| C O | 0.683554  | 0.803520  | 0.013465  |

|     |           |           |           |
|-----|-----------|-----------|-----------|
| C O | 2.927673  | -0.375074 | 0.159745  |
| O O | 3.504410  | 0.576241  | -0.320638 |
| C O | -1.548933 | 1.970945  | -0.083921 |
| C O | -2.917881 | -0.790981 | -0.031582 |
| H O | -1.087844 | -2.566372 | -0.722136 |
| H O | -0.712528 | -2.325343 | 0.968968  |
| H O | 0.951940  | -1.487585 | -1.460808 |
| H O | 1.411543  | -2.594366 | -0.164479 |
| H O | 1.304019  | -0.686400 | 1.460808  |
| H O | 1.051012  | 1.167215  | -0.957532 |
| H O | 0.941979  | 1.600816  | 0.724218  |
| H O | 3.498079  | -1.283839 | 0.465862  |
| H O | -1.397960 | 2.535692  | 0.847164  |
| H O | -2.623909 | 1.882890  | -0.251634 |
| H O | -1.138709 | 2.594366  | -0.890521 |
| H O | -3.242335 | -1.275275 | -0.963795 |
| H O | -3.504410 | 0.121024  | 0.092687  |
| H O | -3.196477 | -1.474877 | 0.782746  |

#### P-3+DMB

B3LYP/6-31G(d) Geometry

|     |           |           |           |
|-----|-----------|-----------|-----------|
| C O | -1.774239 | -1.793216 | 0.069447  |
| C O | -0.263194 | 0.755385  | -0.056941 |
| C O | -1.779595 | 0.714945  | 0.034907  |
| C O | -2.468141 | -0.441742 | 0.076312  |
| C O | -0.274267 | -1.732228 | 0.368683  |
| C O | 0.362887  | -0.583855 | -0.450045 |
| C O | 1.847554  | -0.627938 | -0.317708 |
| O O | 2.510228  | 0.296601  | 0.157954  |
| C O | -2.393281 | 2.093826  | 0.083063  |
| C O | -3.973168 | -0.555372 | 0.124514  |
| H O | -2.259094 | -2.449439 | 0.805920  |
| H O | -1.939162 | -2.281238 | -0.904895 |
| H O | 0.158859  | 1.088237  | 0.902384  |
| H O | 0.035803  | 1.526020  | -0.780434 |
| H O | 0.201250  | -2.694043 | 0.141007  |
| H O | -0.110905 | -1.533313 | 1.435263  |
| H O | 0.155023  | -0.799997 | -1.512154 |
| H O | 2.380866  | -1.533492 | -0.644663 |
| H O | -2.223348 | 2.632059  | -0.860139 |
| H O | -1.916295 | 2.694043  | 0.870124  |
| H O | -3.466806 | 2.090598  | 0.278296  |
| H O | -4.302545 | -0.990964 | 1.078494  |
| H O | -4.328415 | -1.234578 | -0.663116 |
| H O | -4.491894 | 0.395820  | -0.005532 |
| B O | 4.125579  | 0.246800  | 0.322948  |
| H O | 4.278646  | 0.391449  | 1.512154  |
| H O | 4.447861  | -0.839846 | -0.112072 |
| H O | 4.491894  | 1.193015  | -0.331863 |

#### P-4+DMB

B3LYP/6-31G(d) Geometry

|     |           |           |           |
|-----|-----------|-----------|-----------|
| C O | 0.986616  | 0.644490  | -0.023365 |
| C O | 1.484840  | -0.606362 | -0.039979 |
| C O | 0.585046  | -1.829383 | -0.007987 |
| C O | -0.867819 | -1.536394 | 0.382229  |
| C O | -1.342737 | -0.299622 | -0.378409 |
| C O | -0.508351 | 0.919815  | 0.009333  |
| N O | -2.805795 | -0.044437 | -0.072880 |
| O O | -3.603926 | -0.150243 | -0.999903 |
| O O | -3.100661 | 0.235382  | 1.087592  |
| C O | 1.807672  | 1.911486  | -0.022856 |
| C O | 2.952238  | -0.955066 | -0.106229 |

|     |           |           |           |
|-----|-----------|-----------|-----------|
| H O | 1.001031  | -2.564441 | 0.695115  |
| H O | 0.616447  | -2.323267 | -0.992288 |
| H O | -1.507674 | -2.397359 | 0.157654  |
| H O | -0.946275 | -1.335042 | 1.456088  |
| H O | -1.322457 | -0.471368 | -1.456088 |
| H O | -0.810392 | 1.246854  | 1.013558  |
| H O | -0.739670 | 1.754139  | -0.667239 |
| H O | 1.643391  | 2.485045  | -0.945993 |
| H O | 2.880355  | 1.738339  | 0.077455  |
| H O | 1.499572  | 2.564441  | 0.805492  |
| H O | 3.276720  | -1.456580 | 0.816437  |
| H O | 3.603926  | -0.094367 | -0.265715 |
| H O | 3.137387  | -1.664994 | -0.924374 |

#### P-5+DMB

B3LYP/6-31G(d) Geometry

|     |           |           |           |
|-----|-----------|-----------|-----------|
| C O | 0.977566  | 0.674912  | 0.013170  |
| C O | 1.489192  | -0.568659 | -0.055157 |
| C O | 0.601953  | -1.801195 | -0.068006 |
| C O | -0.846659 | -1.537738 | 0.352008  |
| C O | -1.367576 | -0.279039 | -0.350955 |
| C O | -0.518520 | 0.935396  | 0.048509  |
| C O | -2.838504 | -0.039917 | -0.070266 |
| F O | -3.291176 | 1.076525  | -0.688553 |
| F O | -3.088237 | 0.110817  | 1.253024  |
| F O | -3.602928 | -1.070368 | -0.502538 |
| C O | 1.788615  | 1.947573  | 0.070008  |
| C O | 2.960518  | -0.898003 | -0.138295 |
| H O | 1.038806  | -2.563977 | 0.592179  |
| H O | 0.623160  | -2.247702 | -1.075600 |
| H O | -0.900957 | -1.385394 | 1.437151  |
| H O | -1.477394 | -2.401212 | 0.114988  |
| H O | -1.296187 | -0.424631 | -1.437151 |
| H O | -0.807499 | 1.264541  | 1.058413  |
| H O | -0.753711 | 1.779797  | -0.612615 |
| H O | 1.623803  | 2.557771  | -0.829423 |
| H O | 2.862661  | 1.781529  | 0.169750  |
| H O | 1.469927  | 2.563977  | 0.922345  |
| H O | 3.293770  | -1.432708 | 0.762580  |
| H O | 3.602928  | -0.024818 | -0.265580 |
| H O | 3.150894  | -1.573186 | -0.984401 |

#### P-6+DMB

B3LYP/6-31G(d) Geometry

|     |           |           |           |
|-----|-----------|-----------|-----------|
| C O | 1.475118  | 0.621398  | -0.018655 |
| C O | 2.060184  | -0.559365 | -0.293385 |
| C O | 1.245605  | -1.817128 | -0.540434 |
| C O | -0.219158 | -1.708109 | -0.106159 |
| C O | -0.837522 | -0.390359 | -0.596357 |
| C O | -0.036855 | 0.787108  | 0.023150  |
| B O | -2.375045 | -0.139786 | -0.290560 |
| C O | -3.176008 | 0.918754  | -1.147529 |
| C O | -3.108784 | -0.928232 | 0.867402  |
| C O | 2.209099  | 1.906354  | 0.286662  |
| C O | 3.549833  | -0.785193 | -0.399322 |
| H O | 1.728974  | -2.660330 | -0.024314 |
| H O | 1.297764  | -2.070347 | -1.612604 |
| H O | -0.781237 | -2.573087 | -0.482308 |
| H O | -0.277457 | -1.754210 | 0.990639  |
| H O | -0.681943 | -0.325163 | -1.687046 |
| H O | -0.336891 | 0.942589  | 1.074594  |
| H O | -0.300367 | 1.724100  | -0.488530 |
| H O | -2.566883 | 1.540560  | -1.813762 |

|     |           |           |           |
|-----|-----------|-----------|-----------|
| H O | -3.800578 | 1.573193  | -0.524363 |
| H O | -3.887917 | 0.364785  | -1.782601 |
| H O | -2.554180 | -0.843756 | 1.813762  |
| H O | -3.116550 | -2.005786 | 0.642305  |
| H O | -4.143097 | -0.616693 | 1.051206  |
| H O | 2.021904  | 2.660330  | -0.491584 |
| H O | 3.290118  | 1.786740  | 0.382001  |
| H O | 1.842050  | 2.339815  | 1.227977  |
| H O | 3.900131  | -1.465664 | 0.390143  |
| H O | 4.143097  | 0.129340  | -0.339828 |
| H O | 3.792435  | -1.273209 | -1.354092 |

#### P-7+DMB

B3LYP/6-31G(d) Geometry

|      |           |           |           |
|------|-----------|-----------|-----------|
| C O  | 1.076809  | 0.545137  | 0.277853  |
| C O  | 1.676806  | -0.533430 | -0.259003 |
| C O  | 0.880880  | -1.719499 | -0.774272 |
| C O  | -0.583378 | -1.736679 | -0.327444 |
| C O  | -1.210597 | -0.343788 | -0.515238 |
| C O  | -0.436111 | 0.672767  | 0.369662  |
| B O  | -2.741379 | -0.232344 | -0.197248 |
| Cl O | -3.745142 | 0.981098  | -1.008312 |
| Cl O | -3.526574 | -1.247746 | 1.021082  |
| C O  | 1.792582  | 1.741710  | 0.859365  |
| C O  | 3.168537  | -0.702591 | -0.423377 |
| H O  | 1.374730  | -2.646989 | -0.449338 |
| H O  | 0.935920  | -1.736198 | -1.875242 |
| H O  | -1.137116 | -2.498641 | -0.889225 |
| H O  | -0.645478 | -2.020937 | 0.730444  |
| H O  | -1.061731 | -0.033170 | -1.559998 |
| H O  | -0.737338 | 0.562940  | 1.424432  |
| H O  | -0.722842 | 1.696011  | 0.089726  |
| H O  | 1.589402  | 2.646989  | 0.269615  |
| H O  | 2.875294  | 1.618288  | 0.921173  |
| H O  | 1.426808  | 1.947487  | 1.875242  |
| H O  | 3.541305  | -1.522967 | 0.206433  |
| H O  | 3.745142  | 0.192492  | -0.182694 |
| H O  | 3.406307  | -0.978944 | -1.460241 |

#### P-8+DMB

B3LYP/6-31G(d) Geometry

|      |           |           |           |
|------|-----------|-----------|-----------|
| C O  | -0.791957 | 0.537214  | 0.044358  |
| C O  | -1.210829 | -0.702163 | -0.275546 |
| C O  | -0.257236 | -1.782307 | -0.750469 |
| C O  | 1.161936  | -1.297407 | -1.095036 |
| C O  | 1.618027  | -0.257120 | -0.084537 |
| C O  | 0.672691  | 0.941375  | -0.060005 |
| Cl O | 3.319261  | 0.348065  | -0.515509 |
| C O  | 1.832161  | -0.828896 | 1.320534  |
| O O  | 1.773422  | -2.003964 | 1.595416  |
| C O  | -1.675516 | 1.671918  | 0.503872  |
| C O  | -2.640263 | -1.180300 | -0.187125 |
| H O  | -0.685960 | -2.273601 | -1.635441 |
| H O  | -0.195188 | -2.561359 | 0.020738  |
| H O  | 1.176096  | -0.835296 | -2.088214 |
| H O  | 1.856653  | -2.141446 | -1.108360 |
| H O  | 0.835870  | 1.540299  | -0.966670 |
| H O  | 0.937066  | 1.599685  | 0.779508  |
| H O  | 2.069785  | -0.061873 | 2.088214  |
| H O  | -1.431322 | 1.967858  | 1.533929  |
| H O  | -2.740894 | 1.438760  | 0.467159  |
| H O  | -1.510736 | 2.561359  | -0.120377 |
| H O  | -3.032489 | -1.417909 | -1.186006 |

H O -3.319261 -0.462948 0.276970  
H O -2.692858 -2.110734 0.394432

### P-9+DMB

B3LYP/6-31G(d) Geometry

C O -1.026309 0.687481 -0.259738  
C O -1.444455 -0.560296 0.022053  
C O -0.487467 -1.737814 0.036432  
C O 0.851197 -1.467418 -0.656471  
C O 1.434603 -0.099273 -0.250160  
C O 0.424537 1.008963 -0.576242  
C O 2.780123 0.145142 -0.969416  
C O 1.754760 -0.128463 1.242368  
O O 1.443266 0.713259 2.054282  
C O -1.911563 1.910278 -0.301048  
C O -2.859449 -0.944714 0.382738  
H O -0.972361 -2.604872 -0.434885  
H O -0.314912 -2.043623 1.082069  
H O 0.713665 -1.466610 -1.745858  
H O 1.565859 -2.271037 -0.430760  
H O 0.507316 1.264998 -1.644509  
H O 0.710550 1.916326 -0.028372  
H O 2.644909 0.067336 -2.054282  
H O 3.535746 -0.593131 -0.673229  
H O 3.173499 1.142923 -0.744245  
H O 2.360360 -1.014440 1.552861  
H O -1.647716 2.604872 0.508615  
H O -2.976843 1.687233 -0.217699  
H O -1.761864 2.459163 -1.241509  
H O -3.285293 -1.623653 -0.370119  
H O -3.535746 -0.094404 0.486452  
H O -2.873790 -1.493446 1.335164

### P-10+DMB

B3LYP/6-31G(d) Geometry

C O 1.130792 -0.963437 -0.132785  
C O 1.309964 0.369688 -0.132215  
C O 0.140387 1.334368 -0.084515  
C O -1.244143 0.732851 -0.376824  
C O -1.369907 -0.602919 0.369668  
C O -0.253897 -1.581269 -0.072619  
C O -2.686695 -1.328612 0.179622  
O O -3.502165 -1.099454 -0.687720  
C O -2.350020 1.736247 -0.021818  
C O 2.229528 -1.995904 -0.218243  
C O 2.650917 1.063624 -0.163401  
H O 0.327123 2.155144 -0.793090  
H O 0.122450 1.817687 0.907479  
H O -1.309318 0.513731 -1.451574  
H O -1.249370 -0.428583 1.451574  
H O -0.505901 -1.993408 -1.063295  
H O -0.232936 -2.447109 0.605509  
H O -2.850655 -2.171374 0.892416  
H O -2.175064 2.694193 -0.526160  
H O -2.368792 1.932938 1.058672  
H O -3.333434 1.368756 -0.322938  
H O 2.269847 -2.604420 0.696589  
H O 3.220931 -1.568852 -0.379496  
H O 2.033665 -2.694193 -1.044222  
H O 2.774714 1.631659 -1.096357  
H O 3.502165 0.386725 -0.068830  
H O 2.718749 1.795894 0.653343

### P-11+DMB

B3LYP/6-31G(d) Geometry

C O 1.293282 -0.597947 -0.079921  
C O 1.242787 0.745379 -0.126936  
C O -0.069028 1.507071 -0.117031  
C O -1.314475 0.639996 -0.404376  
C O -1.237405 -0.672930 0.397156  
C O 0.037411 -1.447439 -0.004259  
C O -2.432303 -1.580929 0.170152  
O O -3.216729 -1.459972 -0.743665  
C O -2.531111 1.406108 -0.098908  
N O -3.457293 2.050847 0.173401  
C O 2.554414 -1.427115 -0.122173  
C O 2.443645 1.659617 -0.177019  
H O -0.025728 2.317987 -0.856094  
H O -0.192403 2.007430 0.854938  
H O -1.347323 0.382986 -1.470346  
H O -1.181377 -0.441121 1.470346  
H O -0.125472 -1.936003 -0.978278  
H O 0.198149 -2.266988 0.710159  
H O -2.521154 -2.424514 0.891065  
H O 2.693875 -1.975889 0.819897  
H O 3.457293 -0.842723 -0.305963  
H O 2.485863 -2.185291 -0.914659  
H O 2.483206 2.200711 -1.132716  
H O 3.395179 1.141946 -0.045341  
H O 2.372342 2.424514 0.608399

### P-12+DMB

B3LYP/6-31G(d) Geometry

C O -0.516004 0.011667 1.542503  
C O 0.058193 -2.051888 -0.503668  
C O -1.273077 -1.312938 -0.453602  
C O -1.527805 -0.374158 0.479033  
C O 0.730908 -0.888081 1.619066  
C O 1.168611 -1.292188 0.218883  
C O 1.675534 -0.147896 -0.624216  
O O 1.907813 0.962102 -0.149105  
Cl O 2.680228 -2.363807 0.293277  
C O -2.233073 -1.777162 -1.521889  
C O -2.811684 0.412960 0.581382  
H O -0.208720 1.052967 1.376443  
H O -1.010226 0.007016 2.523939  
H O -0.034826 -3.048141 -0.050036  
H O 0.348611 -2.227732 -1.548104  
H O 1.541590 -0.375304 2.143054  
H O 0.506212 -1.807110 2.170455  
H O 1.862366 -0.327552 -1.691431  
H O -2.335751 -2.870981 -1.492714  
H O -1.857067 -1.527741 -2.523939  
H O -3.232723 -1.351514 -1.424661  
H O -2.594645 1.489337 0.598950  
H O -3.331614 0.185661 1.522413  
H O -3.507795 0.230581 -0.238571  
B O 2.469996 2.215994 -1.025970  
H O 1.608835 3.048141 -0.867584  
H O 3.507795 2.480362 -0.469877  
H O 2.573968 1.781043 -2.152716

### P-13+DMB

B3LYP/6-31G(d) Geometry

C O 0.825886 -0.733997 1.498809  
C O 0.724869 1.560331 -0.370101

|     |           |           |           |
|-----|-----------|-----------|-----------|
| C O | 1.853859  | 0.542802  | -0.404597 |
| C O | 1.889851  | -0.506502 | 0.440589  |
| C O | -0.161349 | 0.425762  | 1.682536  |
| C O | -0.550243 | 1.061875  | 0.338236  |
| C O | -1.248907 | 0.082465  | -0.564311 |
| O O | -1.834608 | -0.917520 | -0.143957 |
| C O | -1.552965 | 2.229711  | 0.532606  |
| C O | 2.901186  | 0.863664  | -1.444140 |
| C O | 2.957210  | -1.574492 | 0.445425  |
| H O | 0.277485  | -1.655191 | 1.255971  |
| H O | 1.320492  | -0.939818 | 2.458808  |
| H O | 1.064214  | 2.482101  | 0.127046  |
| H O | 0.479491  | 1.864986  | -1.399054 |
| H O | -1.053499 | 0.079675  | 2.214949  |
| H O | 0.293954  | 1.214290  | 2.295221  |
| H O | -1.290051 | 0.290338  | -1.644792 |
| H O | -1.825831 | 2.697225  | -0.420620 |
| H O | -1.091469 | 2.996576  | 1.164183  |
| H O | -2.469356 | 1.884728  | 1.022525  |
| H O | 3.250135  | 1.899344  | -1.325493 |
| H O | 2.484237  | 0.793145  | -2.458808 |
| H O | 3.778561  | 0.216584  | -1.398017 |
| H O | 2.494687  | -2.569817 | 0.403036  |
| H O | 3.535752  | -1.541872 | 1.379392  |
| H O | 3.659707  | -1.502838 | -0.386578 |
| B O | -2.662279 | -1.940504 | -1.096971 |
| H O | -2.107358 | -2.996576 | -0.907433 |
| H O | -3.778561 | -1.890205 | -0.638036 |
| H O | -2.543526 | -1.486711 | -2.216637 |

#### P-14+DMB

B3LYP/6-31G(d) Geometry

|     |           |           |           |
|-----|-----------|-----------|-----------|
| C O | 1.792258  | -1.893849 | 0.146987  |
| C O | 0.276790  | 0.680332  | -0.045774 |
| C O | 1.787306  | 0.579744  | -0.266841 |
| C O | 2.476349  | -0.570696 | -0.136676 |
| C O | 0.302655  | -1.878726 | -0.189899 |
| C O | -0.347598 | -0.632972 | 0.461586  |
| C O | -1.824722 | -0.729376 | 0.265295  |
| O O | -2.470248 | 0.043144  | -0.446857 |
| C O | -0.085670 | 1.830851  | 0.919938  |
| C O | 2.433199  | 1.890409  | -0.667744 |
| C O | 3.976345  | -0.696332 | -0.268480 |
| H O | 2.284934  | -2.683341 | -0.437573 |
| H O | 1.936656  | -2.178084 | 1.201814  |
| H O | -0.187595 | 0.916355  | -1.014992 |
| H O | -0.182823 | -2.799786 | 0.155501  |
| H O | 0.164433  | -1.824762 | -1.276832 |
| H O | -0.181950 | -0.727755 | 1.547983  |
| H O | -2.364483 | -1.558300 | 0.747989  |
| H O | 0.244936  | 2.799786  | 0.537067  |
| H O | 0.382135  | 1.678260  | 1.900529  |
| H O | -1.169565 | 1.891638  | 1.059907  |
| H O | 2.594914  | 2.555139  | 0.191133  |
| H O | 1.785539  | 2.434832  | -1.366969 |
| H O | 3.395913  | 1.749884  | -1.162513 |
| H O | 4.249040  | -1.254112 | -1.175996 |
| H O | 4.380453  | -1.269385 | 0.577538  |
| H O | 4.499064  | 0.261302  | -0.290781 |
| B O | -4.069206 | -0.097114 | -0.701455 |
| H O | -4.499064 | 0.956241  | -0.296119 |
| H O | -4.140402 | -0.221552 | -1.900529 |
| H O | -4.399758 | -1.072998 | -0.059426 |

#### P-15+DMB

B3LYP/6-31G(d) Geometry

|     |           |           |           |
|-----|-----------|-----------|-----------|
| C O | 1.272025  | -0.047194 | 1.378635  |
| C O | 1.524302  | -0.286388 | -1.576405 |
| C O | 2.246128  | -1.223409 | -0.623399 |
| C O | 2.119238  | -1.117418 | 0.713844  |
| C O | 0.763705  | 1.067093  | 0.433571  |
| C O | 0.346257  | 0.460133  | -0.926927 |
| C O | -0.853213 | -0.431028 | -0.800448 |
| O O | -1.587081 | -0.424983 | 0.188448  |
| C O | 1.786033  | 2.099977  | 0.212913  |
| N O | 2.593748  | 2.912855  | 0.026734  |
| C O | 3.122251  | -2.222758 | -1.339158 |
| C O | 2.781136  | -2.027346 | 1.720642  |
| H O | 1.845586  | 0.413147  | 2.193093  |
| H O | 0.401301  | -0.514387 | 1.856927  |
| H O | 2.228790  | 0.451770  | -1.984196 |
| H O | 1.161258  | -0.854481 | -2.444700 |
| H O | -0.101989 | 1.555371  | 0.895202  |
| H O | 0.026729  | 1.263427  | -1.612019 |
| H O | -1.109372 | -1.094928 | -1.639186 |
| H O | 3.794575  | -1.703763 | -2.036309 |
| H O | 2.518581  | -2.912855 | -1.945142 |
| H O | 3.743065  | -2.819346 | -0.669699 |
| H O | 2.041052  | -2.393675 | 2.444700  |
| H O | 3.539364  | -1.481284 | 2.298878  |
| H O | 3.262273  | -2.898802 | 1.274462  |
| B O | -2.921683 | -1.355685 | 0.329072  |
| H O | -2.680214 | -2.008593 | 1.315436  |
| H O | -3.794575 | -0.537717 | 0.487057  |
| H O | -2.968634 | -1.977243 | -0.710962 |

#### P-16+DMB

B3LYP/6-31G(d) Geometry

|     |           |           |           |
|-----|-----------|-----------|-----------|
| C O | -1.140647 | 0.523534  | -0.161290 |
| C O | -1.591440 | -0.719242 | -0.413543 |
| C O | -0.660032 | -1.849876 | -0.809850 |
| C O | 0.744797  | -1.404011 | -1.217393 |
| C O | 1.287043  | -0.340893 | -0.219077 |
| C O | 0.331636  | 0.887285  | -0.240613 |
| C O | 1.351351  | -0.914658 | 1.142793  |
| N O | 1.381117  | -1.378074 | 2.206038  |
| C O | 2.645992  | 0.079225  | -0.614160 |
| N O | 3.697965  | 0.421347  | -0.964472 |
| C O | -1.998469 | 1.707251  | 0.217102  |
| C O | -3.033097 | -1.154046 | -0.311130 |
| H O | -1.104048 | -2.406648 | -1.646463 |
| H O | -0.597077 | -2.569685 | 0.019780  |
| H O | 0.730687  | -0.931713 | -2.206038 |
| H O | 1.429657  | -2.255665 | -1.267343 |
| H O | 0.535928  | 1.451037  | -1.161831 |
| H O | 0.596131  | 1.556615  | 0.586879  |
| H O | -1.795809 | 2.022187  | 1.250200  |
| H O | -3.068524 | 1.514197  | 0.129000  |
| H O | -1.765597 | 2.569685  | -0.422717 |
| H O | -3.419566 | -1.457072 | -1.294301 |
| H O | -3.697965 | -0.387290 | 0.089260  |
| H O | -3.116123 | -2.035131 | 0.339732  |

#### P-17+DMB

B3LYP/6-31G(d) Geometry

|     |          |          |          |
|-----|----------|----------|----------|
| C O | 1.173740 | 0.611368 | 0.258043 |
|-----|----------|----------|----------|

|     |           |           |           |
|-----|-----------|-----------|-----------|
| C O | 1.566178  | -0.551054 | -0.296410 |
| C O | 0.578410  | -1.546332 | -0.880368 |
| C O | -0.890585 | -1.299562 | -0.477236 |
| C O | -1.186430 | 0.218041  | -0.632263 |
| C O | -0.284129 | 1.032420  | 0.313529  |
| C O | -2.606950 | 0.535373  | -0.444634 |
| N O | -3.729633 | 0.794065  | -0.303406 |
| C O | -1.151639 | -1.759528 | 0.895513  |
| N O | -1.343100 | -2.128656 | 1.979153  |
| C O | 2.092095  | 1.621848  | 0.901886  |
| C O | 2.996864  | -1.017362 | -0.418549 |
| H O | 0.864537  | -2.562805 | -0.581920 |
| H O | 0.639859  | -1.532320 | -1.979153 |
| H O | -1.551972 | -1.867613 | -1.141875 |
| H O | -0.930726 | 0.474053  | -1.669103 |
| H O | -0.659409 | 0.943767  | 1.342761  |
| H O | -0.370160 | 2.095463  | 0.054298  |
| H O | 2.099859  | 2.562805  | 0.334089  |
| H O | 3.123069  | 1.278250  | 0.997827  |
| H O | 1.732645  | 1.870385  | 1.909658  |
| H O | 3.173951  | -1.900881 | 0.210388  |
| H O | 3.729633  | -0.257370 | -0.143704 |
| H O | 3.211618  | -1.323415 | -1.451893 |

#### P-18+DMB

B3LYP/6-31G(d) Geometry

|     |           |           |           |
|-----|-----------|-----------|-----------|
| C O | -1.265000 | 0.672457  | -0.018416 |
| C O | -1.265000 | -0.672457 | 0.018416  |
| C O | 0.018756  | -1.481003 | 0.028130  |
| C O | 1.273166  | -0.679144 | -0.376749 |
| C O | 1.273166  | 0.679144  | 0.376750  |
| C O | 0.018756  | 1.481002  | -0.028130 |
| C O | 2.486438  | 1.465166  | 0.119899  |
| N O | 3.424092  | 2.113346  | -0.098798 |
| C O | 2.486438  | -1.465166 | -0.119899 |
| N O | 3.424093  | -2.113345 | 0.098798  |
| C O | -2.497351 | 1.543425  | -0.068202 |
| C O | -2.497351 | -1.543425 | 0.068202  |
| H O | -0.081840 | -2.335951 | -0.652921 |
| H O | 0.175475  | -1.918723 | 1.025101  |
| H O | 1.235229  | -0.466086 | -1.453048 |
| H O | 1.235229  | 0.466086  | 1.453048  |
| H O | 0.175474  | 1.918723  | -1.025101 |
| H O | -0.081840 | 2.335951  | 0.652922  |
| H O | -2.592226 | 2.139430  | 0.850159  |
| H O | -3.424092 | 0.983608  | -0.202199 |
| H O | -2.422944 | 2.261261  | -0.896554 |
| H O | -2.592225 | -2.139430 | -0.850160 |
| H O | -3.424093 | -0.983608 | 0.202199  |
| H O | -2.422944 | -2.261261 | 0.896553  |

#### P-19+DMB

B3LYP/6-31G(d) Geometry

|     |           |           |           |
|-----|-----------|-----------|-----------|
| C O | 1.234059  | -1.008946 | -0.047898 |
| C O | 1.464630  | 0.315474  | 0.013799  |
| C O | 0.332880  | 1.327133  | 0.031317  |
| C O | -1.048600 | 0.785461  | -0.363031 |
| C O | -1.255253 | -0.567580 | 0.360209  |
| C O | -0.172343 | -1.577498 | -0.073980 |
| C O | -2.594066 | -1.127003 | 0.128919  |
| N O | -3.646734 | -1.576068 | -0.069347 |
| C O | -2.155134 | 1.803243  | -0.068931 |
| C O | 2.296922  | -2.079649 | -0.113358 |

|     |           |           |           |
|-----|-----------|-----------|-----------|
| C O | 2.830696  | 0.955133  | 0.083479  |
| H O | 0.272088  | 1.780946  | 1.035105  |
| H O | 0.588471  | 2.159609  | -0.640617 |
| H O | -1.043211 | 0.574613  | -1.441878 |
| H O | -1.160348 | -0.391639 | 1.441878  |
| H O | -0.405841 | -1.945216 | -1.084550 |
| H O | -0.222171 | -2.461156 | 0.576411  |
| H O | -1.954137 | 2.748966  | -0.585142 |
| H O | -2.217849 | 2.017784  | 1.005641  |
| H O | -3.133706 | 1.439448  | -0.397823 |
| H O | 2.274422  | -2.711494 | 0.785863  |
| H O | 3.309164  | -1.686382 | -0.221445 |
| H O | 2.110822  | -2.748966 | -0.964868 |
| H O | 3.032031  | 1.547079  | -0.820600 |
| H O | 3.646734  | 0.240417  | 0.203942  |
| H O | 2.879213  | 1.656773  | 0.927923  |

#### P-20+DMB

B3LYP/6-31G(d) Geometry

|     |           |           |           |
|-----|-----------|-----------|-----------|
| C O | 1.078370  | 0.575653  | -0.127042 |
| C O | 1.435078  | -0.720212 | -0.199898 |
| C O | 0.434389  | -1.808843 | -0.541894 |
| C O | -0.879804 | -1.290331 | -1.128905 |
| C O | -1.420639 | -0.078359 | -0.335335 |
| C O | -0.348271 | 1.037408  | -0.370241 |
| C O | -1.661096 | -0.483559 | 1.065646  |
| N O | -1.869527 | -0.807081 | 2.161569  |
| C O | -2.753230 | 0.426112  | -0.928370 |
| C O | 2.011327  | 1.721343  | 0.185202  |
| C O | 2.821331  | -1.255353 | 0.066360  |
| H O | 0.229754  | -2.401572 | 0.362701  |
| H O | 0.893950  | -2.510793 | -1.252157 |
| H O | -0.722524 | -0.952148 | -2.161569 |
| H O | -1.629958 | -2.089072 | -1.160027 |
| H O | -0.609776 | 1.812996  | 0.362601  |
| H O | -0.410784 | 1.530095  | -1.353430 |
| H O | -3.524934 | -0.348544 | -0.876198 |
| H O | -2.607422 | 0.698547  | -1.979510 |
| H O | -3.116331 | 1.307805  | -0.390168 |
| H O | 3.062935  | 1.432554  | 0.225662  |
| H O | 1.752203  | 2.184337  | 1.147846  |
| H O | 1.915901  | 2.510793  | -0.573787 |
| H O | 3.524934  | -0.503354 | 0.427618  |
| H O | 3.246469  | -1.706669 | -0.841432 |
| H O | 2.779462  | -2.055354 | 0.818464  |

#### P-21+DMB

B3LYP/6-31G(d) Geometry

|     |           |           |           |
|-----|-----------|-----------|-----------|
| C O | -1.485592 | 0.254412  | -0.089489 |
| C O | -1.164890 | -1.052162 | -0.090258 |
| C O | 0.276404  | -1.523009 | -0.063894 |
| C O | 1.304805  | -0.430138 | -0.393876 |
| C O | 0.963232  | 0.858513  | 0.399368  |
| C O | -0.430439 | 1.340037  | -0.020538 |
| C O | 2.001410  | 1.964724  | 0.220866  |
| O O | 1.868228  | 2.899599  | -0.537959 |
| C O | 2.716130  | -0.936523 | -0.142013 |
| F O | 2.933026  | -2.125624 | -0.744555 |
| F O | 2.965183  | -1.103766 | 1.179699  |
| F O | 3.653009  | -0.079042 | -0.615810 |
| C O | -2.889923 | 0.804492  | -0.160244 |
| C O | -2.150871 | -2.195489 | -0.109027 |
| H O | 0.398747  | -2.348915 | -0.776108 |



|     |           |           |           |
|-----|-----------|-----------|-----------|
| H O | 0.506803  | -1.951666 | 0.923791  |
| H O | 1.257271  | -0.196088 | -1.464812 |
| H O | 0.964801  | 0.588206  | 1.464812  |
| H O | -0.350409 | 1.855545  | -0.987685 |
| H O | -0.760549 | 2.115872  | 0.684377  |
| H O | 2.910073  | 1.874147  | 0.850361  |
| H O | -3.148430 | 1.336799  | 0.766023  |
| H O | -3.653009 | 0.043783  | -0.333817 |
| H O | -2.967350 | 1.541986  | -0.970979 |
| H O | -2.069917 | -2.769935 | -1.042664 |
| H O | -3.189727 | -1.879997 | 0.000873  |
| H O | -1.932427 | -2.899599 | 0.706078  |

### P-22+DMB

B3LYP/6-31G(d) Geometry

|     |           |           |           |
|-----|-----------|-----------|-----------|
| C O | -1.550012 | -1.206129 | -0.049591 |
| C O | -2.025186 | 0.047092  | -0.163255 |
| C O | -1.100013 | 1.247741  | -0.231651 |
| C O | 0.354981  | 0.978501  | 0.179702  |
| C O | 0.848131  | -0.329143 | -0.475797 |
| C O | -0.058812 | -1.499067 | -0.009413 |
| B O | 2.350278  | -0.748092 | -0.168239 |
| C O | 1.245078  | 2.180295  | -0.163114 |
| C O | 3.255509  | -1.283373 | -1.348096 |
| C O | 2.949061  | -0.701299 | 1.295199  |
| C O | -2.396330 | -2.452205 | 0.063767  |
| C O | -3.487022 | 0.417453  | -0.248360 |
| H O | -1.513897 | 2.051613  | 0.396989  |
| H O | -1.118109 | 1.653009  | -1.258213 |
| H O | 0.374822  | 0.838726  | 1.271055  |
| H O | 0.701507  | -0.225862 | -1.563979 |
| H O | 0.207400  | -1.800527 | 1.018056  |
| H O | 0.137745  | -2.388651 | -0.626997 |
| H O | 0.856996  | 3.105208  | 0.281428  |
| H O | 1.295953  | 2.332072  | -1.249493 |
| H O | 2.269668  | 2.042944  | 0.204025  |
| H O | 3.589538  | -0.407805 | -1.930536 |
| H O | 2.698103  | -1.905986 | -2.061091 |
| H O | 4.157893  | -1.822529 | -1.036833 |
| H O | 3.159970  | -1.731971 | 1.621794  |
| H O | 2.322511  | -0.231753 | 2.061091  |
| H O | 3.928933  | -0.201896 | 1.298340  |
| H O | -2.252066 | -3.105208 | -0.809085 |
| H O | -3.465572 | -2.252721 | 0.158242  |
| H O | -2.092978 | -3.041310 | 0.941058  |
| H O | -3.793803 | 1.007278  | 0.627451  |
| H O | -4.157893 | -0.440567 | -0.324728 |
| H O | -3.666604 | 1.055372  | -1.125457 |

### P-23+DMB

B3LYP/6-31G(d) Geometry

|      |           |           |           |
|------|-----------|-----------|-----------|
| C O  | -1.180399 | -1.258618 | -0.024994 |
| C O  | -1.725998 | -0.035420 | -0.147056 |
| C O  | -0.872588 | 1.217914  | -0.197545 |
| C O  | 0.592324  | 1.042989  | 0.227216  |
| C O  | 1.156914  | -0.244422 | -0.425572 |
| C O  | 0.322691  | -1.465021 | 0.046643  |
| B O  | 2.678108  | -0.508022 | -0.141751 |
| C O  | 1.408377  | 2.295032  | -0.120434 |
| Cl O | 3.820690  | -0.844049 | -1.450637 |
| Cl O | 3.314887  | -0.544521 | 1.512933  |
| C O  | -1.951387 | -2.553873 | 0.070990  |
| C O  | -3.204776 | 0.248652  | -0.260939 |

|     |           |           |           |
|-----|-----------|-----------|-----------|
| H O | -1.336350 | 1.989790  | 0.435400  |
| H O | -0.906702 | 1.631350  | -1.220102 |
| H O | 0.620502  | 0.902028  | 1.316991  |
| H O | 1.023182  | -0.151310 | -1.512933 |
| H O | 0.596587  | -1.729314 | 1.079906  |
| H O | 0.586085  | -2.345141 | -0.557986 |
| H O | 0.953128  | 3.192795  | 0.314466  |
| H O | 1.458994  | 2.442138  | -1.206953 |
| H O | 2.435275  | 2.232703  | 0.259080  |
| H O | -1.755458 | -3.192795 | -0.801958 |
| H O | -3.031539 | -2.417924 | 0.150308  |
| H O | -1.626441 | -3.126867 | 0.950873  |
| H O | -3.564230 | 0.811519  | 0.612302  |
| H O | -3.820690 | -0.647422 | -0.357292 |
| H O | -3.403528 | 0.881300  | -1.137485 |

### P-24+DMB

B3LYP/6-31G(d) Geometry

|     |           |           |           |
|-----|-----------|-----------|-----------|
| C O | -1.100689 | 0.670107  | -0.060125 |
| C O | -1.100685 | -0.670134 | 0.060131  |
| C O | 0.186860  | -1.471966 | 0.128443  |
| C O | 1.422895  | -0.683589 | -0.324837 |
| C O | 1.422891  | 0.683573  | 0.324837  |
| C O | 0.186852  | 1.471946  | -0.128441 |
| N O | 2.649863  | 1.494579  | -0.051529 |
| N O | 2.649870  | -1.494590 | 0.051533  |
| O O | 2.906666  | 2.448567  | 0.671622  |
| O O | 3.259080  | 1.178575  | -1.069904 |
| O O | 2.906692  | -2.448567 | -0.671623 |
| O O | 3.259047  | -1.178616 | 1.069941  |
| C O | -2.330266 | 1.539731  | -0.157932 |
| C O | -2.330257 | -1.539764 | 0.157940  |
| H O | 0.104789  | -2.371371 | -0.493005 |
| H O | 0.345415  | -1.827626 | 1.157892  |
| H O | 1.465891  | -0.604577 | -1.410914 |
| H O | 1.465888  | 0.604562  | 1.410914  |
| H O | 0.345403  | 1.827605  | -1.157890 |
| H O | 0.104780  | 2.371352  | 0.493006  |
| H O | -2.413833 | 2.196208  | 0.719124  |
| H O | -3.259080 | 0.974102  | -0.243946 |
| H O | -2.262395 | 2.199158  | -1.033868 |
| H O | -2.413832 | -2.196228 | -0.719126 |
| H O | -3.259073 | -0.974142 | 0.243972  |
| H O | -2.262373 | -2.199205 | 1.033864  |

### P-25+DMB

B3LYP/6-31G(d) Geometry

|     |           |           |           |
|-----|-----------|-----------|-----------|
| C O | 0.930004  | -1.265212 | 0.401169  |
| C O | 1.449667  | -0.363147 | -0.454550 |
| C O | 0.569592  | 0.524799  | -1.320025 |
| C O | -0.566210 | -1.498595 | 0.525007  |
| C O | -0.879335 | 0.633736  | -0.802244 |
| C O | -1.393810 | -0.808535 | -0.575790 |
| C O | -0.953773 | 1.535633  | 0.421757  |
| C O | -2.909816 | -0.992769 | -0.388680 |
| O O | -3.567691 | -1.631567 | -1.178599 |
| O O | -3.474610 | -0.454084 | 0.706416  |
| O O | -1.568511 | 1.317357  | 1.455254  |
| O O | -0.277011 | 2.686327  | 0.258973  |
| C O | 1.735793  | -2.150030 | 1.322298  |
| C O | 2.923561  | -0.126169 | -0.680745 |
| H O | 1.013603  | 1.523486  | -1.390229 |
| H O | 0.541463  | 0.136355  | -2.348797 |



|     |           |           |           |
|-----|-----------|-----------|-----------|
| H O | -0.901360 | -1.180633 | 1.521536  |
| H O | -0.762447 | -2.579060 | 0.482021  |
| H O | -1.487338 | 1.132031  | -1.570971 |
| H O | -1.197535 | -1.329939 | -1.517112 |
| H O | -2.820505 | 0.104981  | 1.184759  |
| H O | -0.412909 | 3.205548  | 1.075027  |
| H O | 2.798379  | -1.902817 | 1.351865  |
| H O | 1.642638  | -3.205548 | 1.030672  |
| H O | 1.350981  | -2.078427 | 2.348797  |
| H O | 3.567691  | -0.842629 | -0.168318 |
| H O | 3.213317  | 0.883115  | -0.355774 |
| H O | 3.156604  | -0.183444 | -1.753314 |

#### P-26+DMB

B3LYP/6-31G(d) Geometry

|     |           |           |           |
|-----|-----------|-----------|-----------|
| C O | 1.270685  | 0.661614  | -0.602910 |
| C O | 1.249859  | -0.677719 | -0.726131 |
| C O | -0.041787 | -1.461744 | -0.862291 |
| C O | -1.317522 | -0.675553 | -0.438467 |
| C O | -1.241955 | 0.740556  | -1.110762 |
| C O | 0.003638  | 1.494354  | -0.605931 |
| C O | -1.368578 | -0.542586 | 1.032518  |
| C O | -2.512141 | -1.410775 | -0.896988 |
| N O | -3.421046 | -2.008208 | -1.299921 |
| N O | -1.378536 | -0.433993 | 2.187183  |
| C O | -2.459644 | 1.532852  | -0.904586 |
| N O | -3.403477 | 2.187882  | -0.742509 |
| C O | 2.512663  | 1.499402  | -0.421402 |
| C O | 2.464637  | -1.573694 | -0.756069 |
| H O | 0.010599  | -2.377010 | -0.261075 |
| H O | -0.183000 | -1.791818 | -1.900984 |
| H O | -1.142589 | 0.553726  | -2.187183 |
| H O | -0.189820 | 1.882966  | 0.403373  |
| H O | 0.143858  | 2.377010  | -1.242668 |
| H O | 2.663684  | 2.165650  | -1.281928 |
| H O | 3.421046  | 0.910736  | -0.287832 |
| H O | 2.406720  | 2.146929  | 0.459312  |
| H O | 2.508179  | -2.201141 | 0.144748  |
| H O | 3.405335  | -1.026717 | -0.830473 |
| H O | 2.413709  | -2.259748 | -1.612504 |

#### P-27+DMB

B3LYP/6-31G(d) Geometry

|     |           |           |           |
|-----|-----------|-----------|-----------|
| C O | -1.287820 | -0.872120 | -0.515523 |
| C O | -1.337865 | 0.452611  | -0.287669 |
| C O | -0.091732 | 1.314896  | -0.328001 |
| C O | 1.141510  | 0.664245  | -0.971975 |
| C O | 1.306086  | -0.796171 | -0.453490 |
| C O | 0.019255  | -1.583441 | -0.807794 |
| C O | 1.476446  | -0.779776 | 1.014790  |
| N O | 1.631738  | -0.763373 | 2.165916  |
| C O | 2.530023  | -1.508522 | -1.072908 |
| C O | 2.384123  | 1.542986  | -0.782135 |
| C O | -2.474819 | -1.805307 | -0.523017 |
| C O | -2.586583 | 1.229739  | 0.051800  |
| H O | 0.156811  | 1.632534  | 0.697423  |
| H O | -0.317582 | 2.244686  | -0.870561 |
| H O | 0.948716  | 0.561727  | -2.050140 |
| H O | 0.034893  | -2.546702 | -0.279596 |
| H O | 0.069447  | -1.836611 | -1.878789 |
| H O | 3.471516  | -1.058654 | -0.747908 |
| H O | 2.474731  | -1.449415 | -2.165916 |
| H O | 2.544563  | -2.565289 | -0.786628 |

|     |           |           |           |
|-----|-----------|-----------|-----------|
| H O | 2.675304  | 1.592720  | 0.273808  |
| H O | 2.177032  | 2.565289  | -1.118524 |
| H O | 3.241578  | 1.176339  | -1.355252 |
| H O | -3.435516 | -1.293336 | -0.444873 |
| H O | -2.409695 | -2.526607 | 0.303836  |
| H O | -2.491549 | -2.397049 | -1.449338 |
| H O | -3.471516 | 0.605640  | 0.187526  |
| H O | -2.811761 | 1.969134  | -0.729858 |
| H O | -2.437854 | 1.797518  | 0.980721  |

#### P-28+DMB

B3LYP/6-31G(d) Geometry

|     |           |           |           |
|-----|-----------|-----------|-----------|
| C O | 1.208055  | -1.011910 | -0.469321 |
| C O | 1.459593  | 0.307629  | -0.388550 |
| C O | 0.341523  | 1.331681  | -0.394055 |
| C O | -1.040690 | 0.802791  | -0.804742 |
| C O | -1.308501 | -0.566243 | -0.102478 |
| C O | -0.206295 | -1.557379 | -0.562131 |
| C O | -2.611934 | -1.094362 | -0.549873 |
| N O | -3.635460 | -1.513845 | -0.904969 |
| C O | -2.132159 | 1.856023  | -0.580537 |
| C O | -1.334869 | -0.462753 | 1.441555  |
| C O | 2.254694  | -2.099908 | -0.509556 |
| C O | 2.832415  | 0.925789  | -0.271736 |
| H O | 0.279914  | 1.804909  | 0.599722  |
| H O | 0.612572  | 2.151102  | -1.076291 |
| H O | -1.006015 | 0.581879  | -1.880840 |
| H O | -0.407524 | -1.867912 | -1.598151 |
| H O | -0.282802 | -2.475343 | 0.036750  |
| H O | -1.912272 | 2.755458  | -1.167017 |
| H O | -2.195462 | 2.159580  | 0.470828  |
| H O | -3.115746 | 1.487007  | -0.888825 |
| H O | -2.084766 | 0.255180  | 1.784996  |
| H O | -0.354495 | -0.155475 | 1.815512  |
| H O | -1.576587 | -1.435662 | 1.880840  |
| H O | 2.187761  | -2.742353 | 0.379808  |
| H O | 3.276801  | -1.722800 | -0.574437 |
| H O | 2.089705  | -2.755458 | -1.376026 |
| H O | 3.063743  | 1.533831  | -1.157726 |
| H O | 3.635460  | 0.197004  | -0.147983 |
| H O | 2.871056  | 1.608617  | 0.588548  |

#### P-29+DMB

B3LYP/6-31G(d) Geometry

|     |           |           |           |
|-----|-----------|-----------|-----------|
| C O | -1.123021 | -0.497031 | 0.507721  |
| C O | -1.403201 | -0.038188 | -0.725955 |
| C O | -0.315114 | 0.361605  | -1.704819 |
| C O | 1.075447  | 0.555698  | -1.064819 |
| C O | 1.395320  | -0.620105 | -0.082021 |
| C O | 0.300936  | -0.656448 | 1.010009  |
| C O | 2.800676  | -0.482689 | 0.541444  |
| C O | 1.357382  | -1.872125 | -0.864143 |
| C O | 1.157118  | 1.841860  | -0.356281 |
| N O | 1.353771  | -2.859016 | -1.475944 |
| N O | 1.224185  | 2.859016  | 0.199631  |
| C O | -2.148133 | -0.884264 | 1.545800  |
| C O | -2.788447 | 0.117838  | -1.304564 |
| H O | -0.603392 | 1.288186  | -2.217259 |
| H O | -0.226406 | -0.401363 | -2.491013 |
| H O | 1.837664  | 0.574211  | -1.853899 |
| H O | 0.524598  | 0.138311  | 1.737062  |
| H O | 0.390102  | -1.600381 | 1.563524  |
| H O | 2.870369  | 0.455882  | 1.099414  |

|     |           |           |           |
|-----|-----------|-----------|-----------|
| H O | 3.576466  | -0.489175 | -0.230935 |
| H O | 2.996072  | -1.311801 | 1.228308  |
| H O | -2.092025 | -1.959225 | 1.767121  |
| H O | -3.174227 | -0.654772 | 1.254757  |
| H O | -1.949092 | -0.360474 | 2.491013  |
| H O | -3.017192 | 1.176950  | -1.487996 |
| H O | -3.576466 | -0.290868 | -0.670510 |
| H O | -2.852753 | -0.388330 | -2.277594 |

### P-30+DMB

B3LYP/6-31G(d) Geometry

|     |           |           |           |
|-----|-----------|-----------|-----------|
| C O | 1.240337  | 0.923692  | -0.283320 |
| C O | 1.416796  | -0.378175 | -0.574102 |
| C O | 0.251973  | -1.307756 | -0.863409 |
| C O | -1.144857 | -0.782177 | -0.450931 |
| C O | -1.224247 | 0.704238  | -0.923104 |
| C O | -0.136192 | 1.559011  | -0.244807 |
| C O | -2.555979 | 1.292266  | -0.729520 |
| N O | -3.604789 | 1.767502  | -0.581985 |
| C O | -1.271807 | -0.841105 | 1.019447  |
| N O | -1.372421 | -0.905024 | 2.174245  |
| C O | -2.257537 | -1.645281 | -1.081932 |
| C O | 2.340513  | 1.898364  | 0.059903  |
| C O | 2.751462  | -1.078609 | -0.658806 |
| H O | 0.422797  | -2.270416 | -0.363708 |
| H O | 0.220271  | -1.537795 | -1.939858 |
| H O | -1.033471 | 0.684664  | -2.004831 |
| H O | -0.426055 | 1.757591  | 0.796523  |
| H O | -0.103546 | 2.539333  | -0.737639 |
| H O | -2.138654 | -2.693333 | -0.790464 |
| H O | -2.199353 | -1.581890 | -2.174245 |
| H O | -3.248558 | -1.308596 | -0.766186 |
| H O | 2.409676  | 2.693333  | -0.695781 |
| H O | 3.323995  | 1.434917  | 0.150940  |
| H O | 2.121090  | 2.395726  | 1.014505  |
| H O | 2.856497  | -1.815639 | 0.149526  |
| H O | 3.604789  | -0.400807 | -0.607234 |
| H O | 2.831203  | -1.637573 | -1.601557 |

### P-31+DMB

B3LYP/6-31G(d) Geometry

|     |           |           |           |
|-----|-----------|-----------|-----------|
| C O | 1.097064  | 1.082037  | -0.234874 |
| C O | 1.361955  | -0.235390 | -0.310786 |
| C O | 0.257165  | -1.265845 | -0.464852 |
| C O | -1.169248 | -0.792773 | -0.110819 |
| C O | -1.358377 | 0.602415  | -0.795814 |
| C O | -0.318138 | 1.616638  | -0.310040 |
| C O | -2.770477 | 1.134859  | -0.642957 |
| O O | -3.083028 | 2.092343  | 0.033613  |
| C O | -1.327535 | -0.683613 | 1.419559  |
| C O | -2.178654 | -1.825563 | -0.649128 |
| C O | 2.129878  | 2.169892  | -0.058392 |
| C O | 2.741486  | -0.849508 | -0.281352 |
| H O | 0.496235  | -2.141442 | 0.158236  |
| H O | 0.267118  | -1.643050 | -1.501248 |
| H O | -1.220772 | 0.427664  | -1.875757 |
| H O | -0.623393 | 2.013141  | 0.668094  |
| H O | -0.337759 | 2.490281  | -0.977382 |
| H O | -3.550523 | 0.580206  | -1.210294 |
| H O | -0.545328 | -0.062418 | 1.865753  |
| H O | -1.260868 | -1.678643 | 1.875757  |
| H O | -2.297756 | -0.254765 | 1.695258  |
| H O | -1.919221 | -2.828686 | -0.289508 |

|     |           |           |           |
|-----|-----------|-----------|-----------|
| H O | -2.177979 | -1.856635 | -1.745999 |
| H O | -3.201590 | -1.616834 | -0.316542 |
| H O | 2.158036  | 2.828686  | -0.938016 |
| H O | 3.141188  | 1.795796  | 0.111486  |
| H O | 1.866001  | 2.809492  | 0.795356  |
| H O | 2.876320  | -1.469807 | 0.616247  |
| H O | 3.550523  | -0.117146 | -0.305702 |
| H O | 2.878850  | -1.520065 | -1.141579 |

### P-32+DMB

B3LYP/6-31G(d) Geometry

|     |           |           |           |
|-----|-----------|-----------|-----------|
| C O | 1.284742  | 0.545777  | -0.598595 |
| C O | 1.300577  | -0.795042 | -0.708166 |
| C O | 0.029709  | -1.608329 | -0.864564 |
| C O | -1.265783 | -0.851108 | -0.445469 |
| C O | -1.233311 | 0.572029  | -1.098594 |
| C O | -0.001120 | 1.347223  | -0.631947 |
| C O | -2.526642 | 1.355598  | -0.885142 |
| O O | -2.550852 | 2.529620  | -0.597903 |
| C O | -1.333869 | -0.732712 | 1.027307  |
| C O | -2.438630 | -1.620267 | -0.910821 |
| N O | -3.336803 | -2.230870 | -1.319811 |
| N O | -1.375491 | -0.627851 | 2.181913  |
| C O | 2.505376  | 1.411852  | -0.404746 |
| C O | 2.535511  | -1.663908 | -0.705033 |
| H O | 0.097443  | -2.529620 | -0.273572 |
| H O | -0.096970 | -1.928041 | -1.908594 |
| H O | -1.171423 | 0.382539  | -2.181913 |
| H O | -0.196984 | 1.775324  | 0.361074  |
| H O | 0.122866  | 2.215803  | -1.290488 |
| H O | -3.465185 | 0.783013  | -1.040331 |
| H O | 2.651860  | 2.076315  | -1.267508 |
| H O | 3.426464  | 0.846863  | -0.254961 |
| H O | 2.370775  | 2.063200  | 0.469186  |
| H O | 2.571134  | -2.289409 | 0.197720  |
| H O | 3.465185  | -1.095683 | -0.756365 |
| H O | 2.522947  | -2.352505 | -1.561183 |

### P-33+DMB

B3LYP/6-31G(d) Geometry

|     |           |           |           |
|-----|-----------|-----------|-----------|
| C O | -1.265072 | 0.604370  | -0.294889 |
| C O | -1.265072 | -0.604370 | 0.294889  |
| C O | 0.013020  | -1.338389 | 0.650275  |
| C O | 1.283309  | -0.793008 | -0.063687 |
| C O | 1.283309  | 0.793008  | 0.063687  |
| C O | 0.013020  | 1.338389  | -0.650275 |
| C O | 1.257433  | 1.157097  | 1.494937  |
| C O | 1.257433  | -1.157097 | -1.494937 |
| C O | 2.490953  | -1.374930 | 0.551457  |
| N O | 3.418460  | -1.848460 | 1.061618  |
| N O | 1.210243  | -1.450620 | -2.615864 |
| N O | 1.210243  | 1.450621  | 2.615864  |
| C O | 2.490953  | 1.374930  | -0.551457 |
| N O | 3.418459  | 1.848460  | -1.061618 |
| C O | -2.495613 | 1.378513  | -0.700074 |
| C O | -2.495613 | -1.378513 | 0.700074  |
| H O | -0.079483 | -2.400490 | 0.395541  |
| H O | 0.190161  | -1.297591 | 1.732904  |
| H O | 0.190161  | 1.297591  | -1.732904 |
| H O | -0.079483 | 2.400490  | -0.395540 |
| H O | -2.597363 | 2.290668  | -0.096554 |
| H O | -3.418460 | 0.805642  | -0.603792 |
| H O | -2.415399 | 1.700858  | -1.746769 |

|     |           |           |          |
|-----|-----------|-----------|----------|
| H O | -2.597361 | -2.290669 | 0.096556 |
| H O | -3.418460 | -0.805642 | 0.603790 |
| H O | -2.415400 | -1.700856 | 1.746769 |

#### P-34+DMB

B3LYP/6-31G(d) Geometry

|     |           |           |           |
|-----|-----------|-----------|-----------|
| C O | 1.240042  | -0.629286 | -0.508846 |
| C O | 1.440766  | 0.256769  | 0.483133  |
| C O | 0.294277  | 0.922733  | 1.219605  |
| C O | -1.093147 | 0.812298  | 0.543538  |
| C O | -1.271273 | -0.685917 | 0.056195  |
| C O | -0.148198 | -1.037030 | -0.961939 |
| C O | -1.183817 | -1.582515 | 1.228748  |
| C O | -1.125681 | 1.683148  | -0.647433 |
| C O | -2.215832 | 1.246214  | 1.508758  |
| N O | -1.150789 | 2.392503  | -1.565806 |
| N O | -1.103529 | -2.282277 | 2.150586  |
| C O | -2.591822 | -0.885915 | -0.573481 |
| N O | -3.621124 | -1.039051 | -1.086094 |
| C O | 2.323973  | -1.310871 | -1.307923 |
| C O | 2.789966  | 0.687013  | 1.004662  |
| H O | 0.516960  | 1.989053  | 1.353849  |
| H O | 0.213930  | 0.504964  | 2.233429  |
| H O | -0.397147 | -0.552564 | -1.915319 |
| H O | -0.180625 | -2.116807 | -1.149049 |
| H O | -2.037380 | 2.270879  | 1.847534  |
| H O | -2.230768 | 0.588859  | 2.383580  |
| H O | -3.194200 | 1.210101  | 1.022003  |
| H O | 2.329486  | -2.392503 | -1.115071 |
| H O | 3.323054  | -0.926412 | -1.099174 |
| H O | 2.140556  | -1.185044 | -2.383580 |
| H O | 2.968501  | 1.749702  | 0.790067  |
| H O | 3.621124  | 0.115882  | 0.589108  |
| H O | 2.828045  | 0.577451  | 2.097002  |

#### P-35+DMB

B3LYP/6-31G(d) Geometry

|     |           |           |           |
|-----|-----------|-----------|-----------|
| C O | 1.452197  | 0.198564  | 0.475101  |
| C O | 1.235010  | -0.743042 | -0.460182 |
| C O | -0.161343 | -1.102026 | -0.928440 |
| C O | -1.287611 | -0.645593 | 0.045441  |
| C O | -1.047639 | 0.862786  | 0.445587  |
| C O | 0.322566  | 0.974467  | 1.125283  |
| C O | -2.171522 | 1.391360  | 1.364083  |
| C O | -1.266900 | -1.483906 | 1.262831  |
| C O | -2.601870 | -0.832399 | -0.606342 |
| C O | -1.099101 | 1.721363  | -0.827985 |
| N O | -3.620229 | -0.966500 | -1.146668 |
| N O | -1.239759 | -2.132490 | 2.224505  |
| O O | -0.312975 | 2.603585  | -1.082004 |
| C O | 2.808080  | 0.595236  | 1.004891  |
| C O | 2.300854  | -1.537199 | -1.175872 |
| H O | -0.244529 | -2.185978 | -1.071971 |
| H O | -0.364643 | -0.655081 | -1.912945 |
| H O | 0.231498  | 0.666399  | 2.176688  |
| H O | 0.590310  | 2.037724  | 1.140925  |
| H O | -2.250842 | 0.772886  | 2.264201  |
| H O | -3.144721 | 1.390039  | 0.861326  |
| H O | -1.945822 | 2.417440  | 1.671308  |
| H O | -1.963851 | 1.518792  | -1.496010 |
| H O | 3.044733  | 1.629380  | 0.720000  |
| H O | 3.620229  | -0.044708 | 0.656841  |
| H O | 2.809920  | 0.564454  | 2.102811  |

|     |          |           |           |
|-----|----------|-----------|-----------|
| H O | 2.233043 | -2.603585 | -0.919444 |
| H O | 3.314180 | -1.201700 | -0.951445 |
| H O | 2.165624 | -1.468128 | -2.264201 |

#### P-36+DMB

B3LYP/6-31G(d) Geometry

|     |           |           |           |
|-----|-----------|-----------|-----------|
| C O | 1.222919  | -0.935453 | -0.290725 |
| C O | 1.376267  | 0.376307  | -0.030317 |
| C O | 0.186973  | 1.288726  | 0.199610  |
| C O | -1.188706 | 0.749928  | -0.259933 |
| C O | -1.303605 | -0.733041 | 0.232886  |
| C O | -0.150298 | -1.573617 | -0.382167 |
| C O | -2.594508 | -1.444096 | -0.164643 |
| O O | -3.567533 | -0.978073 | -0.716013 |
| C O | -1.261169 | 0.833385  | -1.803077 |
| C O | -2.290558 | 1.660650  | 0.321097  |
| C O | -1.229920 | -0.869961 | 1.777416  |
| C O | 2.343501  | -1.913817 | -0.553447 |
| C O | 2.703827  | 1.086631  | 0.089975  |
| H O | 0.369974  | 2.244346  | -0.314779 |
| H O | 0.147689  | 1.551199  | 1.269112  |
| H O | -0.366554 | -1.797997 | -1.438534 |
| H O | -0.121196 | -2.554505 | 0.115357  |
| H O | -2.588173 | -2.525139 | 0.119062  |
| H O | -0.424738 | 0.314805  | -2.282112 |
| H O | -1.210938 | 1.884188  | -2.112689 |
| H O | -2.197627 | 0.417424  | -2.181448 |
| H O | -2.135180 | 2.689853  | -0.025420 |
| H O | -2.274513 | 1.685357  | 1.416243  |
| H O | -3.282441 | 1.338853  | -0.003769 |
| H O | -1.991197 | -0.268948 | 2.282112  |
| H O | -0.245574 | -0.569950 | 2.147145  |
| H O | -1.383361 | -1.915055 | 2.073780  |
| H O | 2.377238  | -2.689853 | 0.224455  |
| H O | 3.329832  | -1.449068 | -0.603854 |
| H O | 2.178421  | -2.438834 | -1.504971 |
| H O | 2.819950  | 1.832455  | -0.709036 |
| H O | 3.567533  | 0.420045  | 0.052936  |
| H O | 2.755273  | 1.641163  | 1.037458  |

#### P-37+DMB

B3LYP/6-31G(d) Geometry

|     |           |           |           |
|-----|-----------|-----------|-----------|
| C O | 0.169498  | -1.731780 | 1.216192  |
| C O | -0.345375 | -0.712243 | -1.517767 |
| C O | -1.462734 | -1.177293 | -0.602179 |
| C O | -1.230052 | -1.636745 | 0.640291  |
| C O | 1.299852  | -1.667915 | 0.146473  |
| C O | 1.010359  | -0.464909 | -0.839664 |
| C O | 1.011464  | 0.814184  | -0.033266 |
| O O | 0.162551  | 1.688121  | -0.197867 |
| C O | 1.336120  | -2.926788 | -0.626637 |
| C O | 2.606111  | -1.509065 | 0.818985  |
| C O | 2.140484  | -0.300711 | -1.887648 |
| N O | 1.356082  | -3.911202 | -1.240026 |
| N O | 3.616991  | -1.346677 | 1.365229  |
| C O | -2.821848 | -1.074151 | -1.248672 |
| C O | -2.283368 | -2.085050 | 1.624080  |
| H O | 0.343115  | -0.923067 | 1.942182  |
| H O | 0.282450  | -2.663991 | 1.782154  |
| H O | -0.650239 | 0.219413  | -2.008481 |
| H O | -0.206005 | -1.444541 | -2.325225 |
| H O | 1.827998  | 0.999234  | 0.680214  |
| H O | 1.886751  | 0.504121  | -2.583970 |

|     |           |           |           |
|-----|-----------|-----------|-----------|
| H O | 2.250152  | -1.229072 | -2.457173 |
| H O | 3.103175  | -0.066629 | -1.422057 |
| H O | -2.806401 | -1.543963 | -2.241233 |
| H O | -3.096252 | -0.021802 | -1.402478 |
| H O | -3.616991 | -1.549297 | -0.672751 |
| H O | -2.156375 | -1.566167 | 2.583970  |
| H O | -2.191326 | -3.159768 | 1.833182  |
| H O | -3.301407 | -1.894106 | 1.282926  |
| B O | 0.173595  | 3.118889  | 0.589751  |
| H O | -0.898899 | 3.115069  | 1.142983  |
| H O | 1.141505  | 3.057923  | 1.316163  |
| H O | 0.250490  | 3.911202  | -0.317360 |

### P-38+DMB

#### B3LYP/6-31G(d) Geometry

|     |           |           |           |
|-----|-----------|-----------|-----------|
| C O | 1.286598  | -0.368510 | -0.562477 |
| C O | 1.286598  | 0.368507  | 0.562478  |
| C O | 0.001058  | 0.813712  | 1.230294  |
| C O | -1.278911 | 0.700377  | 0.365020  |
| C O | -1.278912 | -0.700379 | -0.365020 |
| C O | 0.001058  | -0.813714 | -1.230294 |
| C O | -2.528678 | -0.920156 | -1.247728 |
| C O | -2.528678 | 0.920155  | 1.247728  |
| C O | -1.255396 | -1.752091 | 0.671378  |
| C O | -1.255395 | 1.752090  | -0.671379 |
| N O | -1.259640 | -2.588934 | 1.476612  |
| N O | -1.259638 | 2.588934  | -1.476612 |
| C O | 2.517856  | -0.824544 | -1.306789 |
| C O | 2.517856  | 0.824541  | 1.306789  |
| H O | 0.102592  | 1.856540  | 1.558878  |
| H O | -0.159933 | 0.227586  | 2.146957  |
| H O | -0.159932 | -0.227589 | -2.146957 |
| H O | 0.102591  | -1.856543 | -1.558877 |
| H O | -2.621243 | -0.102803 | -1.969690 |
| H O | -3.444399 | -0.971854 | -0.653498 |
| H O | -2.433105 | -1.860007 | -1.800076 |
| H O | -2.433105 | 1.860007  | 1.800076  |
| H O | -2.621243 | 0.102802  | 1.969690  |
| H O | -3.444399 | 0.971854  | 0.653497  |
| H O | 2.611997  | -1.918976 | -1.272720 |
| H O | 3.444399  | -0.395640 | -0.922183 |
| H O | 2.444040  | -0.550749 | -2.368287 |
| H O | 2.611999  | 1.918974  | 1.272717  |
| H O | 3.444399  | 0.395635  | 0.922185  |
| H O | 2.444039  | 0.550750  | 2.368287  |

### P-39+DMB

#### B3LYP/6-31G(d) Geometry

|     |           |           |           |
|-----|-----------|-----------|-----------|
| C O | -1.232238 | -0.876819 | 0.280525  |
| C O | -1.440992 | 0.356763  | -0.214942 |
| C O | -0.294972 | 1.261874  | -0.622262 |
| C O | 1.106704  | 0.831686  | -0.123596 |
| C O | 1.261988  | -0.724015 | -0.352368 |
| C O | 0.161561  | -1.448992 | 0.465390  |
| C O | 2.584566  | -1.168392 | 0.127274  |
| N O | 3.628220  | -1.535551 | 0.479744  |
| C O | 1.152523  | -1.106896 | -1.849091 |
| C O | 1.185597  | 1.106208  | 1.327797  |
| N O | 1.245382  | 1.353187  | 2.460614  |
| C O | 2.209281  | 1.664191  | -0.815053 |
| C O | -2.313190 | -1.821204 | 0.748100  |
| C O | -2.792688 | 0.992293  | -0.436581 |
| H O | -0.489241 | 2.279311  | -0.257672 |

|     |           |           |           |
|-----|-----------|-----------|-----------|
| H O | -0.260547 | 1.350034  | -1.718474 |
| H O | 0.423431  | -1.428323 | 1.531959  |
| H O | 0.162710  | -2.509315 | 0.180546  |
| H O | 1.899976  | -0.595583 | -2.460614 |
| H O | 0.155426  | -0.874874 | -2.230614 |
| H O | 1.314627  | -2.183318 | -1.958322 |
| H O | 2.075369  | 2.725461  | -0.584730 |
| H O | 2.157214  | 1.545392  | -1.900951 |
| H O | 3.203818  | 1.363017  | -0.474354 |
| H O | -2.340446 | -2.725461 | 0.124167  |
| H O | -3.310996 | -1.379941 | 0.744745  |
| H O | -2.104763 | -2.157264 | 1.772946  |
| H O | -2.935046 | 1.848504  | 0.237328  |
| H O | -3.628220 | 0.306612  | -0.287532 |
| H O | -2.868030 | 1.386374  | -1.459641 |

### P-40+DMB

#### B3LYP/6-31G(d) Geometry

|     |           |           |           |
|-----|-----------|-----------|-----------|
| C O | 1.222648  | -0.984976 | -0.227601 |
| C O | 1.434935  | 0.322938  | 0.009462  |
| C O | 0.288474  | 1.298611  | 0.198441  |
| C O | -1.100297 | 0.814608  | -0.270256 |
| C O | -1.292023 | -0.661110 | 0.257237  |
| C O | -0.175386 | -1.564523 | -0.333889 |
| C O | -2.596316 | -1.185832 | -0.193800 |
| N O | -3.622610 | -1.606076 | -0.540236 |
| C O | -2.186904 | 1.760860  | 0.273658  |
| C O | -1.265365 | -0.764616 | 1.804440  |
| C O | -1.160739 | 0.849534  | -1.813584 |
| C O | 2.299906  | -2.021651 | -0.444164 |
| C O | 2.792408  | 0.971502  | 0.142803  |
| H O | 0.244654  | 1.592136  | 1.259264  |
| H O | 0.523369  | 2.229545  | -0.338828 |
| H O | -0.396153 | -1.791455 | -1.386176 |
| H O | -0.205781 | -2.534998 | 0.180092  |
| H O | -2.032971 | 2.770447  | -0.124566 |
| H O | -2.166330 | 1.835998  | 1.365547  |
| H O | -3.187958 | 1.433046  | -0.027856 |
| H O | -2.041074 | -0.152458 | 2.270358  |
| H O | -0.290042 | -0.455642 | 2.189602  |
| H O | -1.434046 | -1.802571 | 2.108444  |
| H O | -0.326050 | 0.309892  | -2.270358 |
| H O | -1.107813 | 1.888367  | -2.158728 |
| H O | -2.096642 | 0.421338  | -2.188166 |
| H O | 2.289266  | -2.770447 | 0.360348  |
| H O | 3.306756  | -1.604125 | -0.499059 |
| H O | 2.119482  | -2.571098 | -1.378620 |
| H O | 2.960355  | 1.694467  | -0.667868 |
| H O | 3.622610  | 0.263044  | 0.135643  |
| H O | 2.853135  | 1.541210  | 1.080641  |

### P-41+DMB

#### B3LYP/6-31G(d) Geometry

|     |           |           |           |
|-----|-----------|-----------|-----------|
| C O | 0.861200  | 0.739362  | 0.004109  |
| C O | 1.111743  | -0.556003 | -0.268413 |
| C O | 0.236671  | -1.638215 | 0.350016  |
| C O | -1.256556 | -1.288498 | 0.379952  |
| C O | -1.536826 | 0.223306  | 0.679133  |
| C O | -0.303576 | 1.104153  | 0.913103  |
| C O | -2.149909 | 0.335847  | -0.729433 |
| C O | -1.954146 | -1.157941 | -1.013931 |
| O O | -2.577709 | 1.263591  | -1.368917 |
| C O | 1.661338  | 1.918199  | -0.489523 |

|     |           |           |           |
|-----|-----------|-----------|-----------|
| C O | 2.248652  | -1.072393 | -1.114837 |
| H O | 0.575303  | -1.830839 | 1.380821  |
| H O | 0.376662  | -2.585043 | -0.188204 |
| H O | -1.786346 | -1.969667 | 1.052584  |
| H O | -2.288203 | 0.394223  | 1.460618  |
| H O | 0.005523  | 1.026467  | 1.967489  |
| H O | -0.590236 | 2.151377  | 0.755753  |
| H O | -2.894887 | -1.711040 | -1.119512 |
| H O | -1.330780 | -1.366282 | -1.891687 |
| H O | 1.029286  | 2.585043  | -1.092179 |
| H O | 2.527094  | 1.640388  | -1.093911 |
| H O | 2.025392  | 2.518135  | 0.356725  |
| H O | 2.879716  | -1.760922 | -0.534682 |
| H O | 2.894887  | -0.286214 | -1.510055 |
| H O | 1.866451  | -1.651360 | -1.967489 |

#### P-42+DMB

B3LYP/6-31G(d) Geometry

|     |           |           |           |
|-----|-----------|-----------|-----------|
| C O | -1.043247 | 0.715071  | 0.068867  |
| C O | -1.474110 | -0.558982 | 0.134922  |
| C O | -0.587172 | -1.672581 | -0.403095 |
| C O | 0.896147  | -1.483563 | -0.069007 |
| C O | 1.411832  | -0.004444 | -0.210871 |
| C O | 0.311023  | 1.015934  | -0.555498 |
| C O | 1.735149  | -0.039126 | 1.298947  |
| C O | 1.256735  | -1.485462 | 1.452292  |
| C O | 2.656681  | 0.191631  | -1.080825 |
| O O | 2.194450  | 0.780400  | 2.055147  |
| C O | -1.807968 | 1.933363  | 0.521563  |
| C O | -2.809675 | -1.011833 | 0.669064  |
| H O | -0.702210 | -1.736100 | -1.497404 |
| H O | -0.925994 | -2.642018 | -0.013897 |
| H O | 1.502861  | -2.193907 | -0.640586 |
| H O | 0.207091  | 1.061464  | -1.652326 |
| H O | 0.656345  | 2.009949  | -0.243445 |
| H O | 2.041161  | -2.187189 | 1.758547  |
| H O | 0.410401  | -1.591695 | 2.141402  |
| H O | 2.412510  | 0.053690  | -2.141402 |
| H O | 3.447087  | -0.522613 | -0.821537 |
| H O | 3.062879  | 1.201177  | -0.950481 |
| H O | -2.801928 | 1.708507  | 0.914031  |
| H O | -1.931627 | 2.642018  | -0.309718 |
| H O | -1.250591 | 2.468279  | 1.303044  |
| H O | -3.447087 | -0.193158 | 1.009100  |
| H O | -2.677867 | -1.705243 | 1.511769  |
| H O | -3.364502 | -1.566935 | -0.100970 |

#### P-43+DMB

B3LYP/6-31G(d) Geometry

|     |           |           |           |
|-----|-----------|-----------|-----------|
| C O | 1.407210  | 0.431665  | 0.298897  |
| C O | 1.219196  | -0.776934 | -0.264642 |
| C O | -0.070016 | -1.538839 | 0.008512  |
| C O | -1.342492 | -0.672924 | 0.007683  |
| C O | -1.094468 | 0.747406  | 0.636675  |
| C O | 0.314176  | 1.022826  | 1.176827  |
| C O | -2.528791 | -1.431568 | 0.602149  |
| C O | -1.374523 | 1.358812  | -0.745429 |
| C O | -1.652005 | -0.005375 | -1.380419 |
| O O | -1.343767 | 2.488779  | -1.165765 |
| C O | 2.642638  | 1.286318  | 0.172949  |
| C O | 2.216674  | -1.511435 | -1.125252 |
| H O | 0.010582  | -2.039396 | 0.987676  |
| H O | -0.189448 | -2.347518 | -0.725474 |

|     |           |           |           |
|-----|-----------|-----------|-----------|
| H O | -1.853700 | 1.040606  | 1.374070  |
| H O | 0.398274  | 0.623624  | 2.200125  |
| H O | 0.445424  | 2.108802  | 1.261769  |
| H O | -2.334272 | -1.717144 | 1.643488  |
| H O | -2.734284 | -2.349908 | 0.037376  |
| H O | -3.440858 | -0.822140 | 0.588170  |
| H O | -2.680975 | -0.129728 | -1.739399 |
| H O | -0.967379 | -0.252953 | -2.200125 |
| H O | 2.397913  | 2.248525  | -0.297791 |
| H O | 3.440858  | 0.821542  | -0.409292 |
| H O | 3.050113  | 1.522504  | 1.166280  |
| H O | 2.461059  | -2.488779 | -0.684916 |
| H O | 3.154234  | -0.970784 | -1.270053 |
| H O | 1.794138  | -1.719535 | -2.118479 |

#### P-44+DMB

B3LYP/6-31G(d) Geometry

|     |           |           |           |
|-----|-----------|-----------|-----------|
| C O | -1.562001 | 0.122540  | -0.462758 |
| C O | -1.143321 | -0.944071 | 0.244742  |
| C O | 0.305245  | -1.397242 | 0.132284  |
| C O | 1.321300  | -0.229902 | 0.138639  |
| C O | 0.793591  | 1.042356  | -0.637800 |
| C O | -0.563538 | 0.878799  | -1.327040 |
| C O | 2.636757  | -0.691208 | -0.298553 |
| C O | 0.749365  | 1.779162  | 0.712584  |
| C O | 1.365152  | 0.602663  | 1.474940  |
| O O | 0.335352  | 2.859905  | 1.040741  |
| N O | 3.682301  | -1.057622 | -0.649356 |
| C O | -2.968383 | 0.661887  | -0.505019 |
| C O | -2.004258 | -1.815344 | 1.124419  |
| H O | 0.441607  | -1.968546 | -0.797472 |
| H O | 0.556046  | -2.085250 | 0.948223  |
| H O | 1.537466  | 1.474720  | -1.316721 |
| H O | -0.425257 | 0.368291  | -2.292367 |
| H O | -0.947136 | 1.879299  | -1.559807 |
| H O | 2.373043  | 0.803670  | 1.852796  |
| H O | 0.750321  | 0.211730  | 2.292367  |
| H O | -2.994061 | 1.692483  | -0.125291 |
| H O | -3.682301 | 0.072689  | 0.073608  |
| H O | -3.332357 | 0.702808  | -1.541121 |
| H O | -1.972346 | -2.859905 | 0.784024  |
| H O | -3.051209 | -1.507944 | 1.150486  |
| H O | -1.630038 | -1.816243 | 2.157764  |

#### P-45+DMB

B3LYP/6-31G(d) Geometry

|      |           |           |           |
|------|-----------|-----------|-----------|
| C O  | -0.744134 | 0.674575  | -0.346611 |
| C O  | -1.230032 | -0.577419 | -0.447809 |
| C O  | -0.322178 | -1.683898 | -0.967153 |
| C O  | 1.102780  | -1.602281 | -0.407995 |
| C O  | 1.656061  | -0.141853 | -0.341246 |
| C O  | 0.689318  | 0.954976  | -0.783671 |
| C O  | 1.797508  | -0.314307 | 1.195250  |
| C O  | 1.241122  | -1.739104 | 1.143421  |
| O O  | 2.173786  | 0.421049  | 2.066839  |
| C O  | -1.502170 | 1.889571  | 0.123458  |
| C O  | -2.639177 | -1.005164 | -0.125149 |
| Cl O | 3.281070  | 0.088025  | -1.136581 |
| H O  | -0.278260 | -1.641515 | -2.066839 |
| H O  | -0.746056 | -2.666249 | -0.722831 |
| H O  | 1.771043  | -2.275305 | -0.948862 |
| H O  | 0.739443  | 1.040936  | -1.878908 |
| H O  | 1.040143  | 1.909560  | -0.376436 |



|     |           |           |           |
|-----|-----------|-----------|-----------|
| H O | 1.947987  | -2.501689 | 1.488265  |
| H O | 0.302359  | -1.853459 | 1.696762  |
| H O | -2.539940 | 1.680174  | 0.390143  |
| H O | -1.507664 | 2.666249  | -0.654083 |
| H O | -1.011677 | 2.332869  | 1.000874  |
| H O | -3.111697 | -1.463177 | -1.005636 |
| H O | -3.281070 | -0.186419 | 0.205585  |
| H O | -2.643725 | -1.773686 | 0.660505  |

#### P-46+DMB

B3LYP/6-31G(d) Geometry

|     |           |           |           |
|-----|-----------|-----------|-----------|
| C O | 1.434100  | -0.402079 | -0.570630 |
| C O | 1.254917  | 0.846545  | -0.101442 |
| C O | -0.116715 | 1.488295  | -0.230686 |
| C O | -1.276023 | 0.528022  | 0.130870  |
| C O | -1.064853 | -0.953773 | -0.424883 |
| C O | 0.253772  | -1.125488 | -1.199355 |
| C O | -2.554606 | 1.140671  | -0.221155 |
| C O | -0.945927 | -1.409620 | 1.043948  |
| C O | -1.236216 | -0.017494 | 1.606355  |
| O O | -0.699047 | -2.476488 | 1.544180  |
| C O | -2.244836 | -1.595085 | -1.159835 |
| N O | -3.567143 | 1.637242  | -0.501999 |
| C O | 2.725138  | -1.178689 | -0.559626 |
| C O | 2.313023  | 1.725754  | 0.515325  |
| H O | -0.268895 | 1.844044  | -1.260392 |
| H O | -0.186973 | 2.376416  | 0.408509  |
| H O | 0.101369  | -0.778800 | -2.234028 |
| H O | 0.462345  | -2.200242 | -1.262997 |
| H O | -2.186033 | 0.050677  | 2.146949  |
| H O | -0.440458 | 0.396840  | 2.234028  |
| H O | -2.383878 | -1.137465 | -2.145690 |
| H O | -3.183206 | -1.486982 | -0.606883 |
| H O | -2.052874 | -2.664691 | -1.296087 |
| H O | 2.609888  | -2.102650 | 0.023433  |
| H O | 3.567143  | -0.621906 | -0.143736 |
| H O | 2.998966  | -1.485820 | -1.578641 |
| H O | 2.411161  | 2.664691  | -0.047445 |
| H O | 3.298818  | 1.258313  | 0.552742  |
| H O | 2.037530  | 2.008805  | 1.540971  |

#### P-47+DMB

B3LYP/6-31G(d) Geometry

|     |           |           |           |
|-----|-----------|-----------|-----------|
| C O | 1.282684  | -0.850744 | -0.398518 |
| C O | 1.396910  | 0.444421  | -0.051622 |
| C O | 0.221023  | 1.373273  | -0.302944 |
| C O | -1.155127 | 0.777766  | 0.055220  |
| C O | -1.288285 | -0.746897 | -0.380474 |
| C O | -0.014499 | -1.326443 | -1.029838 |
| C O | -1.379234 | -1.100565 | 1.116747  |
| C O | -1.273322 | 0.357177  | 1.562402  |
| C O | -2.530477 | -1.170133 | -1.171966 |
| O O | -1.493391 | -2.150505 | 1.700612  |
| C O | 2.345896  | -1.909323 | -0.253459 |
| C O | 2.619788  | 1.097799  | 0.540944  |
| C O | -2.267469 | 1.721915  | -0.405681 |
| H O | 0.208484  | 1.667992  | -1.365633 |
| H O | 0.354816  | 2.307150  | 0.260098  |
| H O | -0.022865 | -1.070197 | -2.102388 |
| H O | -0.077679 | -2.420706 | -0.978479 |
| H O | -2.166770 | 0.725759  | 2.081533  |
| H O | -0.399386 | 0.561793  | 2.191690  |
| H O | -2.504175 | -0.767346 | -2.191690 |

|     |           |           |           |
|-----|-----------|-----------|-----------|
| H O | -3.461021 | -0.838058 | -0.700900 |
| H O | -2.569527 | -2.263070 | -1.238759 |
| H O | 3.286876  | -1.532578 | 0.153097  |
| H O | 2.565463  | -2.372828 | -1.225759 |
| H O | 1.994531  | -2.717557 | 0.402785  |
| H O | 3.461021  | 0.413877  | 0.671535  |
| H O | 2.391364  | 1.537637  | 1.522182  |
| H O | 2.961355  | 1.927135  | -0.094950 |
| H O | -2.270110 | 1.839429  | -1.496162 |
| H O | -2.124173 | 2.717557  | 0.032893  |
| H O | -3.260838 | 1.373027  | -0.104179 |

#### P-48+DMB

B3LYP/6-31G(d) Geometry

|     |           |           |           |
|-----|-----------|-----------|-----------|
| C O | 1.505300  | 0.609809  | -0.280022 |
| C O | 1.619976  | -0.681395 | 0.081210  |
| C O | 0.458387  | -1.485421 | 0.634116  |
| C O | -0.889173 | -0.765998 | 0.671997  |
| C O | -0.844410 | 0.767116  | 0.791382  |
| C O | 0.189702  | 1.361870  | -0.179068 |
| C O | -2.290399 | 1.189995  | 0.424181  |
| C O | -1.796885 | -1.000005 | -0.543370 |
| C O | -2.705399 | 0.226764  | -0.708173 |
| O O | -1.797077 | -1.982488 | -1.252752 |
| C O | 2.615406  | 1.451855  | -0.863664 |
| C O | 2.888552  | -1.496894 | -0.006760 |
| H O | 0.726830  | -1.826655 | 1.645212  |
| H O | 0.338067  | -2.402832 | 0.039225  |
| H O | -1.479275 | -1.155607 | 1.519251  |
| H O | -0.587827 | 1.070886  | 1.812577  |
| H O | 0.389600  | 2.402832  | 0.113579  |
| H O | -0.242349 | 1.435955  | -1.191225 |
| H O | -2.353985 | 2.243561  | 0.131794  |
| H O | -2.945507 | 1.054685  | 1.293556  |
| H O | -3.758675 | -0.072579 | -0.681492 |
| H O | -2.528854 | 0.646908  | -1.706008 |
| H O | 3.535392  | 0.898996  | -1.061446 |
| H O | 2.863564  | 2.288026  | -0.194169 |
| H O | 2.292751  | 1.903673  | -1.812577 |
| H O | 3.758675  | -0.927873 | -0.338256 |
| H O | 2.756840  | -2.342250 | -0.696643 |
| H O | 3.132427  | -1.933658 | 0.972076  |

#### P-49+DMB

B3LYP/6-31G(d) Geometry

|     |           |           |           |
|-----|-----------|-----------|-----------|
| C O | -1.078206 | -0.761246 | -0.624826 |
| C O | -1.507120 | 0.422304  | -0.149638 |
| C O | -0.553213 | 1.459331  | 0.413229  |
| C O | 0.935978  | 1.200680  | 0.168126  |
| C O | 1.327753  | -0.291777 | 0.247142  |
| C O | 0.393521  | -1.129870 | -0.671124 |
| C O | 2.708809  | -0.308637 | -0.428640 |
| C O | 1.487611  | 1.660528  | -1.203527 |
| C O | 2.839745  | 0.934321  | -1.322306 |
| O O | 3.556636  | -1.162659 | -0.281520 |
| C O | 1.365516  | -0.869992 | 1.662812  |
| C O | -1.962425 | -1.841062 | -1.203664 |
| C O | -2.951984 | 0.856807  | -0.077977 |
| H O | -0.736654 | 1.539052  | 1.496703  |
| H O | -0.821340 | 2.448719  | 0.011078  |
| H O | 1.506833  | 1.736352  | 0.941763  |
| H O | 0.518371  | -2.188604 | -0.406429 |
| H O | 0.724707  | -1.069435 | -1.720865 |



|     |           |           |           |
|-----|-----------|-----------|-----------|
| H O | 1.582056  | 2.750010  | -1.259989 |
| H O | 0.806697  | 1.354119  | -2.006777 |
| H O | 3.662300  | 1.540103  | -0.918690 |
| H O | 3.129943  | 0.654361  | -2.340286 |
| H O | 0.353837  | -0.984016 | 2.067651  |
| H O | 1.933504  | -0.221330 | 2.340286  |
| H O | 1.851917  | -1.850820 | 1.654802  |
| H O | -3.010082 | -1.550577 | -1.300549 |
| H O | -1.921215 | -2.750010 | -0.586979 |
| H O | -1.607100 | -2.131557 | -2.202484 |
| H O | -3.662300 | 0.082798  | -0.373408 |
| H O | -3.126737 | 1.734429  | -0.716561 |
| H O | -3.207497 | 1.166044  | 0.945355  |

#### **P-50+DMB**

B3LYP/6-31G(d) Geometry

|     |           |           |           |
|-----|-----------|-----------|-----------|
| C O | -1.418495 | -0.282445 | -0.553303 |
| C O | -1.585060 | 0.804730  | 0.222030  |
| C O | -0.444169 | 1.431456  | 1.000282  |
| C O | 0.935222  | 0.824178  | 0.750558  |
| C O | 0.970268  | -0.677851 | 0.391557  |
| C O | -0.064033 | -0.950017 | -0.725252 |
| C O | 2.412209  | -0.852258 | -0.164261 |
| C O | 1.748100  | 1.486559  | -0.368392 |
| C O | 2.712485  | 0.441930  | -0.946215 |
| O O | 1.648838  | 2.637427  | -0.734755 |
| C O | 0.700630  | -1.581462 | 1.599917  |
| C O | -2.501994 | -0.938821 | -1.376047 |
| C O | -2.892273 | 1.532858  | 0.428567  |
| H O | -0.686394 | 1.379701  | 2.072473  |
| H O | -0.390626 | 2.504157  | 0.763392  |
| H O | 1.557131  | 0.968409  | 1.651500  |
| H O | -0.206994 | -2.037303 | -0.811755 |
| H O | 0.344620  | -0.644610 | -1.702122 |
| H O | 2.507799  | -1.755636 | -0.777165 |
| H O | 3.111808  | -0.956989 | 0.675039  |
| H O | 3.746998  | 0.790548  | -0.854652 |
| H O | 2.512548  | 0.349028  | -2.020507 |
| H O | -0.326197 | -1.461993 | 1.963621  |
| H O | 1.383218  | -1.350442 | 2.427134  |
| H O | 0.839774  | -2.637427 | 1.335910  |
| H O | -3.455522 | -0.408175 | -1.357793 |
| H O | -2.683045 | -1.967409 | -1.032519 |
| H O | -2.189068 | -1.016702 | -2.427134 |
| H O | -3.746998 | 1.052513  | -0.050781 |
| H O | -2.826650 | 2.561033  | 0.046016  |
| H O | -3.118875 | 1.617260  | 1.500822  |

#### **P-51+DMB**

B3LYP/6-31G(d) Geometry

|     |           |           |           |
|-----|-----------|-----------|-----------|
| C O | -1.404960 | 0.100953  | 0.501226  |
| C O | -1.577988 | -0.686748 | -0.575201 |
| C O | -0.439750 | -1.071945 | -1.500029 |
| C O | 0.951381  | -0.616293 | -1.068168 |
| C O | 1.011068  | 0.693615  | -0.242907 |
| C O | -0.044505 | 0.649855  | 0.890704  |
| C O | 2.459967  | 0.672135  | 0.343716  |
| C O | 1.739646  | -1.603359 | -0.194407 |
| C O | 2.720813  | -0.809412 | 0.677593  |
| O O | 1.609920  | -2.806051 | -0.202255 |
| C O | 0.790339  | 1.872689  | -1.088787 |
| N O | 0.630707  | 2.806051  | -1.761688 |
| C O | -2.488112 | 0.506812  | 1.471861  |

|     |           |           |           |
|-----|-----------|-----------|-----------|
| C O | -2.897337 | -1.273416 | -1.016455 |
| H O | -0.660682 | -0.680224 | -2.503037 |
| H O | -0.412844 | -2.165820 | -1.606795 |
| H O | 1.581813  | -0.481788 | -1.961900 |
| H O | -0.158697 | 1.661666  | 1.300814  |
| H O | 0.358261  | 0.048099  | 1.719974  |
| H O | 2.550100  | 1.335949  | 1.208502  |
| H O | 3.163520  | 1.026301  | -0.416925 |
| H O | 3.748116  | -1.128393 | 0.472588  |
| H O | 2.524482  | -1.052435 | 1.728342  |
| H O | -3.445255 | 0.014307  | 1.294164  |
| H O | -2.656168 | 1.592362  | 1.434523  |
| H O | -2.185710 | 0.275081  | 2.503037  |
| H O | -3.748116 | -0.946711 | -0.416793 |
| H O | -2.862299 | -2.371172 | -0.982455 |
| H O | -3.105036 | -1.002014 | -2.060657 |

#### **P-52+DMB**

B3LYP/6-31G(d) Geometry

|      |           |           |           |
|------|-----------|-----------|-----------|
| C O  | -1.040909 | -0.863817 | -0.433799 |
| C O  | -1.472517 | 0.025085  | 0.478530  |
| C O  | -0.517802 | 0.787830  | 1.376967  |
| C O  | 0.957303  | 0.737307  | 0.978897  |
| C O  | 1.396486  | -0.625481 | 0.422567  |
| C O  | 0.433418  | -1.132110 | -0.669106 |
| C O  | 2.757282  | -0.327378 | -0.248040 |
| C O  | 1.408828  | 1.713723  | -0.135000 |
| C O  | 2.784255  | 1.173003  | -0.571043 |
| O O  | 3.626432  | -1.127941 | -0.490434 |
| C O  | -1.921668 | -1.672165 | -1.356556 |
| C O  | -2.921434 | 0.339511  | 0.763956  |
| Cl O | 1.559801  | -1.867896 | 1.739731  |
| H O  | -0.625130 | 0.396991  | 2.400037  |
| H O  | -0.837369 | 1.839231  | 1.436076  |
| H O  | 1.567832  | 0.947977  | 1.866755  |
| H O  | 0.612611  | -2.204334 | -0.808107 |
| H O  | 0.717854  | -0.675371 | -1.632202 |
| H O  | 1.453762  | 2.744127  | 0.231050  |
| H O  | 0.695963  | 1.695118  | -0.967600 |
| H O  | 3.596850  | 1.614529  | 0.021119  |
| H O  | 3.036745  | 1.338201  | -1.623178 |
| H O  | -1.596861 | -1.554066 | -2.400037 |
| H O  | -2.976575 | -1.397222 | -1.308996 |
| H O  | -1.842139 | -2.744127 | -1.127835 |
| H O  | -3.138912 | 0.195867  | 1.831543  |
| H O  | -3.626432 | -0.273910 | 0.200571  |
| H O  | -3.141481 | 1.393665  | 0.543486  |

#### **P-53+DMB**

B3LYP/6-31G(d) Geometry

|     |           |           |           |
|-----|-----------|-----------|-----------|
| C O | -1.320375 | -0.756566 | -0.070273 |
| C O | -1.446235 | 0.581425  | -0.102361 |
| C O | -0.250015 | 1.508284  | -0.032948 |
| C O | 1.127335  | 0.842287  | -0.231283 |
| C O | 1.238168  | -0.565851 | 0.440157  |
| C O | 0.031724  | -1.439898 | -0.013750 |
| C O | 2.459386  | -1.178823 | -0.272713 |
| C O | 1.506773  | 0.546262  | -1.718137 |
| C O | 2.654911  | -0.473227 | -1.623172 |
| O O | 3.133107  | -2.087935 | 0.155711  |
| C O | 2.159310  | 1.748103  | 0.311887  |
| C O | 1.369770  | -0.570455 | 1.963422  |
| N O | 2.972243  | 2.472899  | 0.716290  |

|     |           |           |           |
|-----|-----------|-----------|-----------|
| C O | -2.463888 | -1.741365 | -0.133312 |
| C O | -2.753334 | 1.335255  | -0.169519 |
| H O | -0.263528 | 2.023451  | 0.938547  |
| H O | -0.361042 | 2.307800  | -0.779781 |
| H O | -0.017656 | -2.299276 | 0.667411  |
| H O | 0.225207  | -1.886456 | -1.002494 |
| H O | 1.783694  | 1.459978  | -2.250880 |
| H O | 0.632703  | 0.120860  | -2.221649 |
| H O | 3.633696  | 0.021651  | -1.599254 |
| H O | 2.686395  | -1.200393 | -2.440362 |
| H O | 0.422096  | -0.297033 | 2.440362  |
| H O | 2.142720  | 0.125054  | 2.304195  |
| H O | 1.651958  | -1.573832 | 2.296826  |
| H O | -3.435253 | -1.277062 | -0.310887 |
| H O | -2.531706 | -2.317719 | 0.799792  |
| H O | -2.295705 | -2.472899 | -0.935948 |
| H O | -3.633696 | 0.694122  | -0.104475 |
| H O | -2.823899 | 1.909775  | -1.103814 |
| H O | -2.816199 | 2.066847  | 0.647868  |

#### P-54+DMB

B3LYP/6-31G(d) Geometry

|     |           |           |           |
|-----|-----------|-----------|-----------|
| C O | -1.170153 | -1.062126 | -0.189746 |
| C O | -1.470547 | 0.241204  | -0.054577 |
| C O | -0.402583 | 1.289756  | 0.180045  |
| C O | 1.058934  | 0.860400  | -0.025170 |
| C O | 1.324153  | -0.603155 | 0.449467  |
| C O | 0.260025  | -1.563585 | -0.167423 |
| C O | 2.629965  | -0.954722 | -0.280170 |
| C O | 1.473217  | 0.797113  | -1.527332 |
| C O | 2.715228  | -0.114474 | -1.564161 |
| O O | 3.452655  | -1.765947 | 0.086856  |
| C O | 1.418414  | -0.829107 | 1.960170  |
| C O | -2.170412 | -2.169845 | -0.424064 |
| C O | -2.865614 | 0.819769  | -0.075339 |
| C O | 1.973200  | 1.875743  | 0.691865  |
| H O | -0.525658 | 1.672144  | 1.206547  |
| H O | -0.607538 | 2.159478  | -0.464726 |
| H O | 0.308234  | -2.511461 | 0.385107  |
| H O | 0.534240  | -1.836924 | -1.199482 |
| H O | 1.670305  | 1.797663  | -1.927419 |
| H O | 0.658990  | 0.368526  | -2.121791 |
| H O | 3.655500  | 0.448880  | -1.538446 |
| H O | 2.771432  | -0.766082 | -2.442912 |
| H O | 0.446714  | -0.674450 | 2.442912  |
| H O | 2.147616  | -0.164137 | 2.431628  |
| H O | 1.743633  | -1.855616 | 2.156740  |
| H O | -3.192696 | -1.817053 | -0.571821 |
| H O | -2.176287 | -2.873898 | 0.419940  |
| H O | -1.892512 | -2.756400 | -1.311240 |
| H O | -3.655500 | 0.068400  | -0.126837 |
| H O | -2.992707 | 1.499464  | -0.929960 |
| H O | -3.042599 | 1.423478  | 0.825926  |
| H O | 1.745628  | 1.946105  | 1.760161  |
| H O | 1.832878  | 2.873898  | 0.259218  |
| H O | 3.036037  | 1.622307  | 0.596870  |

#### P-55+DMB

B3LYP/6-31G(d) Geometry

|     |           |           |           |
|-----|-----------|-----------|-----------|
| C O | 0.992831  | 0.673465  | -0.237189 |
| C O | 0.992619  | -0.673754 | -0.237262 |
| C O | 0.053911  | -1.389566 | 0.721070  |
| C O | -1.360844 | -0.768801 | 0.717350  |

|     |           |           |           |
|-----|-----------|-----------|-----------|
| C O | -1.360585 | 0.769264  | 0.717322  |
| C O | 0.054397  | 1.389480  | 0.721266  |
| C O | -2.103412 | 1.145251  | -0.561076 |
| C O | -2.103968 | -1.144563 | -0.560966 |
| O O | -2.532667 | 0.000419  | -1.218001 |
| O O | -2.319459 | -2.236689 | -1.002970 |
| O O | -2.318371 | 2.237446  | -1.003172 |
| C O | 1.855644  | 1.568039  | -1.088396 |
| C O | 1.855092  | -1.568515 | -1.088615 |
| H O | 0.447012  | -1.344376 | 1.747480  |
| H O | -0.033025 | -2.450642 | 0.466095  |
| H O | -1.938653 | -1.180263 | 1.552904  |
| H O | -1.938401 | 1.180924  | 1.552777  |
| H O | 0.447393  | 1.343897  | 1.747696  |
| H O | -0.032057 | 2.450642  | 0.466495  |
| H O | 2.532356  | 1.020611  | -1.747696 |
| H O | 2.466742  | 2.228949  | -0.457716 |
| H O | 1.232980  | 2.223440  | -1.712410 |
| H O | 2.465235  | -2.230395 | -0.458040 |
| H O | 2.532667  | -1.021246 | -1.747156 |
| H O | 1.232192  | -2.222956 | -1.713414 |

#### P-56+DMB

B3LYP/6-31G(d) Geometry

|     |           |           |           |
|-----|-----------|-----------|-----------|
| C O | 0.643406  | 0.736444  | -0.057413 |
| C O | 0.964287  | -0.553048 | -0.277695 |
| C O | 0.205573  | -1.613331 | 0.504700  |
| C O | -1.321310 | -1.377014 | 0.512681  |
| C O | -1.682374 | 0.110285  | 0.714525  |
| C O | -0.464488 | 1.028389  | 0.940449  |
| C O | -2.410569 | 0.522406  | -0.566240 |
| C O | -1.990841 | -1.738774 | -0.841580 |
| O O | -2.603526 | -0.551540 | -1.372838 |
| O O | -2.781804 | 1.629114  | -0.866290 |
| C O | 1.274810  | 1.941677  | -0.703257 |
| C O | 2.042161  | -1.056773 | -1.202640 |
| H O | 0.558849  | -1.628572 | 1.547411  |
| H O | 0.415970  | -2.613644 | 0.105014  |
| H O | -1.763956 | -1.988931 | 1.305059  |
| H O | -2.393509 | 0.244210  | 1.538553  |
| H O | -0.100044 | 0.890581  | 1.969619  |
| H O | -0.799751 | 2.067396  | 0.858863  |
| H O | -2.774180 | -2.495619 | -0.734646 |
| H O | -1.265795 | -2.091823 | -1.582129 |
| H O | 2.075191  | 1.692948  | -1.403601 |
| H O | 1.694288  | 2.613644  | 0.058681  |
| H O | 0.516608  | 2.521770  | -1.246396 |
| H O | 2.781804  | -1.652137 | -0.648532 |
| H O | 2.580025  | -0.257441 | -1.716765 |
| H O | 1.622258  | -1.722954 | -1.969619 |

#### P-57+DMB

B3LYP/6-31G(d) Geometry

|     |           |           |           |
|-----|-----------|-----------|-----------|
| C O | 1.560438  | 0.637066  | -0.269596 |
| C O | 1.820230  | -0.586542 | 0.225288  |
| C O | 0.763523  | -1.425017 | 0.920908  |
| C O | -0.673455 | -0.910226 | 0.799918  |
| C O | -0.735629 | 0.634817  | 0.893570  |
| C O | 0.182833  | 1.265843  | -0.164014 |
| C O | -2.915135 | 0.645474  | -0.460269 |
| C O | -1.391695 | -1.392728 | -0.464363 |
| C O | -2.823283 | -0.887345 | -0.611185 |

|     |           |           |           |
|-----|-----------|-----------|-----------|
| O 0 | -0.878867 | -2.135569 | -1.280175 |
| C 0 | -2.190276 | 1.136187  | 0.803260  |
| C 0 | 2.550088  | 1.508700  | -1.005337 |
| C 0 | 3.160052  | -1.280273 | 0.163847  |
| H 0 | 0.807131  | -2.445625 | 0.519876  |
| H 0 | 1.028056  | -1.508351 | 1.986744  |
| H 0 | -1.268690 | -1.311722 | 1.636407  |
| H 0 | -0.336968 | 0.911020  | 1.879682  |
| H 0 | -0.291314 | 1.229793  | -1.158019 |
| H 0 | 0.292078  | 2.337805  | 0.059329  |
| H 0 | -2.482645 | 1.118884  | -1.350332 |
| H 0 | -3.968270 | 0.950320  | -0.433805 |
| H 0 | -3.422230 | -1.360728 | 0.181980  |
| H 0 | -3.216981 | -1.229331 | -1.572910 |
| H 0 | -2.738387 | 0.785182  | 1.689719  |
| H 0 | -2.209335 | 2.233383  | 0.841394  |
| H 0 | 3.516797  | 1.032064  | -1.177284 |
| H 0 | 2.729658  | 2.445625  | -0.458383 |
| H 0 | 2.147607  | 1.797976  | -1.986744 |
| H 0 | 3.968270  | -0.649352 | -0.210552 |
| H 0 | 3.103808  | -2.171753 | -0.476330 |
| H 0 | 3.453179  | -1.634580 | 1.162308  |

#### P-58+DMB

B3LYP/6-31G(d) Geometry

|     |           |           |           |
|-----|-----------|-----------|-----------|
| C 0 | 1.839953  | 0.166478  | 0.177884  |
| C 0 | 1.438985  | -0.841391 | -0.618796 |
| C 0 | -0.014534 | -1.272229 | -0.707966 |
| C 0 | -0.931743 | -0.760016 | 0.436871  |
| C 0 | -0.621103 | 0.745724  | 0.703522  |
| C 0 | 0.864619  | 0.927310  | 1.056391  |
| C 0 | -2.548375 | 1.508101  | -0.766931 |
| C 0 | -2.400973 | -0.916213 | -0.010670 |
| C 0 | -2.915828 | 0.046295  | -1.077661 |
| O 0 | -3.128453 | -1.772428 | 0.459270  |
| C 0 | -1.053441 | 1.653797  | -0.462964 |
| C 0 | -0.698332 | -1.604136 | 1.701020  |
| C 0 | 3.266372  | 0.638616  | 0.331430  |
| C 0 | 2.339448  | -1.644258 | -1.528138 |
| H 0 | -0.400668 | -0.962282 | -1.690554 |
| H 0 | -0.062624 | -2.370684 | -0.720804 |
| H 0 | -1.211905 | 1.051419  | 1.580634  |
| H 0 | 1.037879  | 0.638096  | 2.104303  |
| H 0 | 1.110499  | 1.999095  | 1.015986  |
| H 0 | -2.839609 | 2.151153  | -1.606346 |
| H 0 | -3.128822 | 1.847711  | 0.102357  |
| H 0 | -2.473691 | -0.237315 | -2.043544 |
| H 0 | -3.996628 | -0.100237 | -1.161600 |
| H 0 | -0.461382 | 1.426084  | -1.359773 |
| H 0 | -0.828628 | 2.696416  | -0.203299 |
| H 0 | 0.363964  | -1.637803 | 1.959330  |
| H 0 | -1.050998 | -2.626482 | 1.543973  |
| H 0 | -1.252153 | -1.196974 | 2.554387  |
| H 0 | 3.376722  | 1.671533  | -0.028392 |
| H 0 | 3.996628  | 0.021897  | -0.195582 |
| H 0 | 3.550954  | 0.651553  | 1.393033  |
| H 0 | 2.375407  | -2.696416 | -1.212027 |
| H 0 | 3.365026  | -1.273311 | -1.571731 |
| H 0 | 1.945612  | -1.645042 | -2.554387 |

#### P-59+DMB

B3LYP/6-31G(d) Geometry

|     |           |           |           |
|-----|-----------|-----------|-----------|
| C 0 | -1.540620 | -0.301620 | -0.581053 |
|-----|-----------|-----------|-----------|

|     |           |           |           |
|-----|-----------|-----------|-----------|
| C 0 | -1.817782 | 0.675909  | 0.300531  |
| C 0 | -0.773443 | 1.219058  | 1.256746  |
| C 0 | 0.668428  | 0.795232  | 0.958708  |
| C 0 | 0.765976  | -0.702073 | 0.531592  |
| C 0 | -0.156068 | -0.918023 | -0.688601 |
| C 0 | 2.901590  | -0.131365 | -0.830715 |
| C 0 | 1.339767  | 1.708210  | -0.075934 |
| C 0 | 2.779099  | 1.347138  | -0.415558 |
| O 0 | 0.777742  | 2.663729  | -0.578184 |
| C 0 | 2.234211  | -1.059798 | 0.193632  |
| C 0 | 0.302603  | -1.608562 | 1.689183  |
| C 0 | -2.514537 | -0.870847 | -1.585330 |
| C 0 | -3.160684 | 1.346814  | 0.462320  |
| H 0 | -0.823349 | 2.314779  | 1.241741  |
| H 0 | -1.040687 | 0.920736  | 2.281907  |
| H 0 | 1.272484  | 0.908737  | 1.874243  |
| H 0 | 0.319133  | -0.527775 | -1.602030 |
| H 0 | -0.258041 | -2.000068 | -0.863022 |
| H 0 | 2.448454  | -0.265613 | -1.820684 |
| H 0 | 3.959499  | -0.398494 | -0.941632 |
| H 0 | 3.388517  | 1.517365  | 0.485143  |
| H 0 | 3.136316  | 2.026674  | -1.194695 |
| H 0 | 2.816207  | -1.032652 | 1.127062  |
| H 0 | 2.277337  | -2.097585 | -0.163954 |
| H 0 | -0.758428 | -1.467605 | 1.914902  |
| H 0 | 0.877466  | -1.409788 | 2.602327  |
| H 0 | 0.448914  | -2.663729 | 1.426992  |
| H 0 | -3.486785 | -0.374798 | -1.587723 |
| H 0 | -2.683924 | -1.941868 | -1.403075 |
| H 0 | -2.104086 | -0.793003 | -2.602327 |
| H 0 | -3.959499 | 0.885110  | -0.121028 |
| H 0 | -3.099079 | 2.404712  | 0.171401  |
| H 0 | -3.471329 | 1.333307  | 1.516682  |

#### P-60+DMB

B3LYP/6-31G(d) Geometry

|     |           |           |           |
|-----|-----------|-----------|-----------|
| C 0 | -1.550237 | -0.049765 | 0.510617  |
| C 0 | -1.822733 | -0.682179 | -0.644428 |
| C 0 | -0.787183 | -0.856422 | -1.738929 |
| C 0 | 0.653862  | -0.543386 | -1.332019 |
| C 0 | 0.735193  | 0.727647  | -0.426992 |
| C 0 | -0.178811 | 0.528955  | 0.807143  |
| C 0 | 2.899252  | -0.173734 | 0.647842  |
| C 0 | 1.359651  | -1.722721 | -0.642793 |
| C 0 | 2.792864  | -1.451051 | -0.207951 |
| O 0 | 0.825071  | -2.802833 | -0.488877 |
| C 0 | 2.208198  | 1.022381  | -0.021872 |
| C 0 | 0.243325  | 1.883570  | -1.201824 |
| N 0 | -0.112767 | 2.802833  | -1.815994 |
| C 0 | -2.516981 | 0.141849  | 1.654276  |
| C 0 | -3.160807 | -1.274258 | -1.013326 |
| H 0 | -0.825075 | -1.891609 | -2.098463 |
| H 0 | -1.066443 | -0.223773 | -2.593915 |
| H 0 | 1.248578  | -0.337047 | -2.235107 |
| H 0 | 0.334622  | -0.125320 | 1.526826  |
| H 0 | -0.290663 | 1.494627  | 1.318787  |
| H 0 | 2.464829  | -0.362416 | 1.636542  |
| H 0 | 3.954073  | 0.069150  | 0.820303  |
| H 0 | 3.396130  | -1.322361 | -1.119465 |
| H 0 | 3.170394  | -2.331013 | 0.320158  |
| H 0 | 2.762819  | 1.303166  | -0.926613 |
| H 0 | 2.230471  | 1.894552  | 0.642035  |
| H 0 | -3.465274 | -0.379979 | 1.517119  |

|     |           |           |           |
|-----|-----------|-----------|-----------|
| H O | -2.737908 | 1.207993  | 1.805333  |
| H O | -2.076081 | -0.220425 | 2.593915  |
| H O | -3.954073 | -1.051635 | -0.297887 |
| H O | -3.085476 | -2.366416 | -1.106950 |
| H O | -3.485278 | -0.898829 | -1.993692 |

#### **P-61+DMB**

B3LYP/6-31G(d) Geometry

|      |           |           |           |
|------|-----------|-----------|-----------|
| C O  | -1.831430 | -0.126459 | -0.636599 |
| C O  | -1.428008 | -0.750279 | 0.484289  |
| C O  | 0.027444  | -1.096452 | 0.736942  |
| C O  | 0.961924  | -0.993035 | -0.485269 |
| C O  | 0.623517  | 0.256419  | -1.336031 |
| C O  | -0.859303 | 0.248684  | -1.738379 |
| C O  | 2.517875  | 1.561723  | -0.249275 |
| C O  | 2.435942  | -0.975096 | -0.007950 |
| C O  | 2.905576  | 0.343164  | 0.605792  |
| O O  | 3.169615  | -1.934361 | -0.090012 |
| C O  | 1.025576  | 1.549313  | -0.595042 |
| Cl O | 0.712163  | -2.483944 | -1.524568 |
| C O  | -3.262234 | 0.224530  | -0.966577 |
| C O  | -2.322800 | -1.169735 | 1.626097  |
| H O  | 0.406432  | -0.439160 | 1.534780  |
| H O  | 0.105296  | -2.113088 | 1.141415  |
| H O  | 1.228823  | 0.204419  | -2.250806 |
| H O  | -1.005696 | -0.440757 | -2.581436 |
| H O  | -1.120255 | 1.244567  | -2.125210 |
| H O  | 2.785703  | 2.483944  | 0.279811  |
| H O  | 3.104884  | 1.551399  | -1.177782 |
| H O  | 2.453239  | 0.441796  | 1.603126  |
| H O  | 3.986960  | 0.263734  | 0.748501  |
| H O  | 0.420694  | 1.668777  | 0.313498  |
| H O  | 0.785617  | 2.403792  | -1.239889 |
| H O  | -3.388307 | 1.313356  | -1.048916 |
| H O  | -3.986960 | -0.142021 | -0.237591 |
| H O  | -3.538151 | -0.193145 | -1.944827 |
| H O  | -2.349502 | -2.264650 | 1.717051  |
| H O  | -3.350917 | -0.817338 | 1.528030  |
| H O  | -1.934083 | -0.789228 | 2.581436  |

#### **P-62+DMB**

B3LYP/6-31G(d) Geometry

|     |           |           |           |
|-----|-----------|-----------|-----------|
| C O | -1.668030 | 0.492386  | -0.155397 |
| C O | -1.486585 | -0.837930 | -0.082038 |
| C O | -0.113009 | -1.470997 | -0.197376 |
| C O | 1.007848  | -0.569255 | -0.786984 |
| C O | 0.895321  | 0.858994  | -0.130388 |
| C O | -0.515546 | 1.448344  | -0.389301 |
| C O | 2.603471  | 0.239340  | 1.678562  |
| C O | 2.366190  | -1.215495 | -0.418109 |
| C O | 2.808462  | -1.145811 | 1.041608  |
| O O | 3.032942  | -1.801668 | -1.248122 |
| C O | 1.206153  | 0.801878  | 1.392793  |
| C O | 1.880233  | 1.773302  | -0.745124 |
| C O | 0.863049  | -0.509403 | -2.316473 |
| N O | 2.651114  | 2.510992  | -1.204603 |
| C O | -2.999325 | 1.199819  | -0.065047 |
| C O | -2.578347 | -1.855767 | 0.148750  |
| H O | 0.167920  | -1.856030 | 0.793421  |
| H O | -0.182558 | -2.363610 | -0.834314 |
| H O | -0.570882 | 1.829755  | -1.418525 |
| H O | -0.639092 | 2.332641  | 0.250979  |
| H O | 2.767409  | 0.178675  | 2.760654  |

|     |           |           |           |
|-----|-----------|-----------|-----------|
| H O | 3.356763  | 0.933174  | 1.286331  |
| H O | 2.227210  | -1.893522 | 1.600766  |
| H O | 3.854252  | -1.462907 | 1.082056  |
| H O | 0.433396  | 0.194980  | 1.878544  |
| H O | 1.119066  | 1.813356  | 1.806072  |
| H O | -0.148288 | -0.204443 | -2.600824 |
| H O | 1.062139  | -1.495696 | -2.741362 |
| H O | 1.580093  | 0.187056  | -2.760654 |
| H O | -3.039235 | 1.846071  | 0.822986  |
| H O | -3.854252 | 0.522873  | -0.025092 |
| H O | -3.141053 | 1.858875  | -0.932820 |
| H O | -2.691452 | -2.509974 | -0.726899 |
| H O | -3.552522 | -1.413855 | 0.364126  |
| H O | -2.319288 | -2.510992 | 0.992085  |

#### **P-63+DMB**

B3LYP/6-31G(d) Geometry

|     |           |           |           |
|-----|-----------|-----------|-----------|
| C O | 1.750605  | 0.298628  | 0.068155  |
| C O | 1.439937  | -0.960002 | -0.289169 |
| C O | 0.012853  | -1.474149 | -0.258017 |
| C O | -0.996082 | -0.631317 | 0.575927  |
| C O | -0.774217 | 0.900142  | 0.271696  |
| C O | 0.696458  | 1.267934  | 0.563900  |
| C O | -2.519306 | 0.810811  | -1.627676 |
| C O | -2.424762 | -1.025205 | 0.144505  |
| C O | -2.856235 | -0.649607 | -1.271122 |
| O O | -3.183336 | -1.615936 | 0.892289  |
| C O | -1.087806 | 1.187805  | -1.221880 |
| C O | -0.807558 | -0.975878 | 2.064251  |
| C O | 3.142012  | 0.886164  | 0.067092  |
| C O | 2.421628  | -1.993177 | -0.790021 |
| C O | -1.678750 | 1.788190  | 1.154749  |
| H O | -0.324695 | -1.582994 | -1.298461 |
| H O | 0.011365  | -2.497521 | 0.143832  |
| H O | 0.834635  | 1.401464  | 1.648512  |
| H O | 0.895959  | 2.261599  | 0.133556  |
| H O | -2.659837 | 0.969444  | -2.703780 |
| H O | -3.233038 | 1.475465  | -1.126235 |
| H O | -2.343462 | -1.321649 | -1.973431 |
| H O | -3.927104 | -0.856297 | -1.356096 |
| H O | -0.368496 | 0.656316  | -1.856967 |
| H O | -0.927417 | 2.257540  | -1.410439 |
| H O | 0.212819  | -0.753938 | 2.391115  |
| H O | -0.993451 | -2.041477 | 2.223695  |
| H O | -1.509218 | -0.435398 | 2.703780  |
| H O | 3.216916  | 1.708767  | -0.658336 |
| H O | 3.927104  | 0.164108  | -0.165082 |
| H O | 3.374124  | 1.321114  | 1.049470  |
| H O | 2.493390  | -2.835908 | -0.087902 |
| H O | 3.428863  | -1.602926 | -0.946986 |
| H O | 2.079691  | -2.416880 | -1.744891 |
| H O | -1.383977 | 1.743244  | 2.207185  |
| H O | -2.734492 | 1.500913  | 1.100844  |
| H O | -1.602911 | 2.835908  | 0.838307  |

#### **P-64+DMB**

B3LYP/6-31G(d) Geometry

|     |           |           |           |
|-----|-----------|-----------|-----------|
| C O | -2.060409 | -1.188109 | 0.120107  |
| C O | -0.664131 | -0.692260 | 0.541635  |
| O O | -2.337442 | -0.740044 | -1.224098 |
| C O | -3.222743 | -0.531119 | 0.884193  |
| C O | -2.652667 | 0.622531  | -1.018696 |
| C O | -0.613833 | 0.861038  | 0.502541  |

|     |           |           |           |
|-----|-----------|-----------|-----------|
| O O | -3.479181 | 0.672009  | 0.140151  |
| C O | 0.408602  | -1.312597 | -0.367632 |
| C O | -1.335557 | 1.374843  | -0.747505 |
| C O | 0.796638  | 1.429695  | 0.692461  |
| C O | 1.769864  | -0.647077 | -0.328114 |
| O O | -0.952380 | 2.281784  | -1.455834 |
| C O | 1.941762  | 0.598289  | 0.148604  |
| C O | 2.858868  | -1.513888 | -0.914121 |
| C O | 3.262492  | 1.327669  | 0.217256  |
| H O | -2.111090 | -2.280263 | 0.112617  |
| H O | -0.478664 | -1.011960 | 1.576960  |
| H O | -2.973602 | -0.277735 | 1.920476  |
| H O | -4.121040 | -1.158690 | 0.873428  |
| H O | -3.180051 | 1.023492  | -1.886919 |
| H O | -1.241246 | 1.231955  | 1.326289  |
| H O | 0.043420  | -1.312677 | -1.404948 |
| H O | 0.521542  | -2.374186 | -0.100283 |
| H O | 0.974202  | 1.603633  | 1.764971  |
| H O | 0.826236  | 2.422623  | 0.224429  |
| H O | 2.575253  | -1.853022 | -1.920476 |
| H O | 3.002062  | -2.422623 | -0.311929 |
| H O | 3.824706  | -1.013032 | -0.998066 |
| H O | 3.440751  | 1.700945  | 1.235690  |
| H O | 3.252305  | 2.210501  | -0.437138 |
| H O | 4.121040  | 0.714420  | -0.061878 |

#### P-65+DMB

B3LYP/6-31G(d) Geometry

|     |           |           |           |
|-----|-----------|-----------|-----------|
| C O | -1.476464 | -1.537727 | 0.065920  |
| C O | -0.526035 | -0.771528 | 1.006629  |
| O O | -1.132804 | -1.284515 | -1.309917 |
| C O | -2.938615 | -1.065713 | 0.086960  |
| C O | -1.684285 | -0.004474 | -1.511759 |
| C O | -0.394175 | 0.753766  | 0.637938  |
| O O | -2.959363 | 0.005102  | -0.867643 |
| C O | 0.864557  | -1.471940 | 1.067717  |
| C O | -0.787262 | 1.034436  | -0.831899 |
| C O | 1.076325  | 1.218226  | 0.808415  |
| C O | 1.878267  | -0.958123 | 0.061848  |
| O O | -0.441683 | 2.039267  | -1.421753 |
| C O | 2.015363  | 0.376103  | -0.034365 |
| C O | 2.651786  | -1.999446 | -0.701524 |
| C O | 2.970849  | 1.124314  | -0.924864 |
| C O | -1.313499 | 1.631558  | 1.522547  |
| H O | -1.389116 | -2.615436 | 0.228091  |
| H O | -0.965006 | -0.838904 | 2.011872  |
| H O | -3.267336 | -0.698071 | 1.063712  |
| H O | -3.617961 | -1.859374 | -0.246220 |
| H O | -1.792337 | 0.199360  | -2.579357 |
| H O | 0.729626  | -2.554986 | 0.958455  |
| H O | 1.268403  | -1.326597 | 2.081193  |
| H O | 1.336682  | 1.156961  | 1.876779  |
| H O | 1.140662  | 2.271563  | 0.522845  |
| H O | 1.969433  | -2.612005 | -1.307094 |
| H O | 3.169427  | -2.687191 | -0.017627 |
| H O | 3.401172  | -1.572830 | -1.372050 |
| H O | 2.416007  | 1.770709  | -1.617814 |
| H O | 3.617846  | 0.469093  | -1.513017 |
| H O | 3.617961  | 1.785458  | -0.331041 |
| H O | -1.050603 | 1.504688  | 2.579357  |
| H O | -2.370982 | 1.382229  | 1.395522  |
| H O | -1.187739 | 2.687191  | 1.260789  |

#### P-66+DMB

B3LYP/6-31G(d) Geometry

|     |           |           |           |
|-----|-----------|-----------|-----------|
| C O | -2.050293 | -1.038433 | -0.227895 |
| C O | -0.647264 | -0.745322 | 0.365568  |
| O O | -2.273491 | -0.211606 | -1.389242 |
| C O | -3.239256 | -0.604724 | 0.649823  |
| C O | -2.574096 | 1.039165  | -0.805378 |
| C O | -0.577312 | 0.760384  | 0.775810  |
| O O | -3.446495 | 0.770962  | 0.286691  |
| C O | 0.406112  | -1.026412 | -0.730675 |
| C O | -1.256811 | 1.638740  | -0.281713 |
| C O | 0.836246  | 1.229690  | 1.136425  |
| C O | 1.774853  | -0.409222 | -0.510524 |
| O O | -0.835965 | 2.706993  | -0.673908 |
| C O | 1.966612  | 0.622988  | 0.329851  |
| C O | 2.844279  | -1.046129 | -1.365972 |
| C O | 3.291649  | 1.298600  | 0.591464  |
| C O | -0.382012 | -1.650520 | 1.582323  |
| H O | -2.119580 | -2.079497 | -0.556228 |
| H O | -3.048464 | -0.671336 | 1.724879  |
| H O | -4.141167 | -1.179693 | 0.410855  |
| H O | -3.056896 | 1.691700  | -1.535911 |
| H O | -1.215411 | 0.888077  | 1.663433  |
| H O | 0.019897  | -0.684119 | -1.700292 |
| H O | 0.519697  | -2.116707 | -0.832150 |
| H O | 1.024601  | 1.037227  | 2.203692  |
| H O | 0.867023  | 2.321214  | 1.024088  |
| H O | 2.535978  | -1.050601 | -2.421004 |
| H O | 2.994921  | -2.098301 | -1.084710 |
| H O | 3.811350  | -0.543505 | -1.310050 |
| H O | 3.493939  | 1.340176  | 1.671080  |
| H O | 3.270230  | 2.339994  | 0.241319  |
| H O | 4.141167  | 0.803816  | 0.117404  |
| H O | -0.514020 | -2.706993 | 1.317078  |
| H O | -1.051048 | -1.426891 | 2.421004  |
| H O | 0.646739  | -1.526720 | 1.933953  |

#### P-67+DMB

B3LYP/6-31G(d) Geometry

|     |           |           |           |
|-----|-----------|-----------|-----------|
| C O | -2.065297 | 0.869025  | 0.439339  |
| C O | -0.649271 | 0.746556  | -0.212701 |
| O O | -2.281500 | -0.275052 | 1.274525  |
| C O | -3.229491 | 0.739454  | -0.556133 |
| C O | -2.592392 | -1.284317 | 0.328126  |
| C O | -0.582109 | -0.555069 | -1.082209 |
| O O | -3.444122 | -0.681486 | -0.634343 |
| C O | 0.421942  | 0.707209  | 0.905994  |
| C O | -1.271606 | -1.708389 | -0.338724 |
| C O | 0.831743  | -0.876536 | -1.570699 |
| C O | 1.780922  | 0.171691  | 0.500800  |
| O O | -0.855480 | -2.844946 | -0.294209 |
| C O | 1.962853  | -0.554677 | -0.615236 |
| C O | 2.853820  | 0.516923  | 1.505575  |
| C O | 3.284290  | -1.118414 | -1.078374 |
| C O | -0.428015 | 1.916082  | -1.078987 |
| N O | -0.292017 | 2.844946  | -1.763162 |
| H O | -2.121919 | 1.759948  | 1.068384  |
| H O | -3.003254 | 1.137348  | -1.549856 |
| H O | -4.135840 | 1.219761  | -0.172844 |
| H O | -3.089695 | -2.121341 | 0.821977  |
| H O | -1.221925 | -0.395792 | -1.961004 |
| H O | 0.021622  | 0.099044  | 1.727670  |
| H O | 0.536372  | 1.721261  | 1.313023  |



|     |          |           |           |
|-----|----------|-----------|-----------|
| H O | 1.013238 | -0.347552 | -2.517672 |
| H O | 0.862918 | -1.946251 | -1.813454 |
| H O | 2.538540 | 0.226739  | 2.517672  |
| H O | 3.027714 | 1.601897  | 1.533267  |
| H O | 3.810104 | 0.029898  | 1.309237  |
| H O | 3.481608 | -0.820917 | -2.117496 |
| H O | 3.260126 | -2.216872 | -1.068899 |
| H O | 4.135840 | -0.795804 | -0.477432 |

#### P-68+DMB

B3LYP/6-31G(d) Geometry

|      |           |           |           |
|------|-----------|-----------|-----------|
| C O  | 1.477735  | -1.536958 | -0.543459 |
| C O  | 0.621223  | -0.482254 | -1.268217 |
| O O  | 1.026704  | -1.671008 | 0.818560  |
| C O  | 2.957663  | -1.162687 | -0.339115 |
| C O  | 1.644733  | -0.560573 | 1.434353  |
| C O  | 0.565408  | 0.864166  | -0.482332 |
| O O  | 2.966349  | -0.491874 | 0.930677  |
| C O  | -0.817348 | -1.022442 | -1.533878 |
| C O  | 0.868073  | 0.701148  | 1.035886  |
| C O  | -0.784838 | 1.569275  | -0.648419 |
| C O  | -1.858856 | -0.621750 | -0.503090 |
| Cl O | 1.895363  | 1.999032  | -1.113692 |
| O O  | 0.493064  | 1.507626  | 1.857588  |
| C O  | -1.875201 | 0.661638  | -0.100473 |
| C O  | -2.806544 | -1.707141 | -0.068933 |
| C O  | -2.825867 | 1.291605  | 0.880959  |
| H O  | 1.360753  | -2.511920 | -1.023516 |
| H O  | 1.088553  | -0.285130 | -2.238968 |
| H O  | 3.349972  | -0.496194 | -1.111170 |
| H O  | 3.586720  | -2.057247 | -0.269178 |
| H O  | 1.651805  | -0.682501 | 2.519593  |
| H O  | -1.140589 | -0.656255 | -2.519593 |
| H O  | -0.775312 | -2.113913 | -1.624435 |
| H O  | -0.935435 | 1.798629  | -1.712279 |
| H O  | -0.753759 | 2.516053  | -0.105778 |
| H O  | -2.253323 | -2.516053 | 0.427731  |
| H O  | -3.311443 | -2.156381 | -0.935717 |
| H O  | -3.578098 | -1.356214 | 0.619586  |
| H O  | -3.343909 | 2.146112  | 0.423633  |
| H O  | -2.271213 | 1.684604  | 1.742953  |
| H O  | -3.586720 | 0.600401  | 1.250635  |

#### P-69+DMB

B3LYP/6-31G(d) Geometry

|     |           |           |           |
|-----|-----------|-----------|-----------|
| C O | 1.998449  | 1.141014  | -0.800555 |
| C O | 0.666033  | 0.865884  | -0.015897 |
| O O | 2.122662  | 0.145602  | -1.826028 |
| C O | 3.312005  | 0.934031  | -0.039327 |
| C O | 2.577453  | -0.972574 | -1.087561 |
| C O | 0.638547  | -0.585226 | 0.626013  |
| O O | 3.559913  | -0.476576 | -0.188175 |
| C O | -0.468005 | 1.060271  | -1.070278 |
| C O | 1.357096  | -1.555330 | -0.341359 |
| C O | -0.800389 | -1.051543 | 0.948697  |
| C O | -1.816766 | 0.453542  | -0.769440 |
| O O | 1.028417  | -2.711130 | -0.502022 |
| C O | -1.957977 | -0.531580 | 0.129265  |
| C O | -2.916694 | 1.032841  | -1.625527 |
| C O | -3.258425 | -1.216652 | 0.473949  |
| C O | 0.519925  | 1.887516  | 1.032038  |
| C O | 1.424467  | -0.707842 | 1.969872  |
| N O | 0.432442  | 2.711130  | 1.846791  |

|     |           |           |           |
|-----|-----------|-----------|-----------|
| H O | 1.935859  | 2.116826  | -1.287026 |
| H O | 3.259893  | 1.198989  | 1.019320  |
| H O | 4.127149  | 1.491524  | -0.512525 |
| H O | 3.011052  | -1.716255 | -1.759092 |
| H O | -0.103728 | 0.650529  | -2.020650 |
| H O | -0.582656 | 2.140050  | -1.237632 |
| H O | -1.010167 | -0.811235 | 2.001514  |
| H O | -0.789376 | -2.148076 | 0.898714  |
| H O | -2.639212 | 0.992682  | -2.688350 |
| H O | -3.078180 | 2.093357  | -1.386223 |
| H O | -3.871617 | 0.516459  | -1.516819 |
| H O | -3.442559 | -1.167603 | 1.556154  |
| H O | -3.213577 | -2.283473 | 0.214875  |
| H O | -4.127149 | -0.786530 | -0.027048 |
| H O | 1.060958  | 0.032909  | 2.688350  |
| H O | 2.502696  | -0.605008 | 1.858165  |
| H O | 1.233691  | -1.704014 | 2.382243  |

#### P-70+DMB

B3LYP/6-31G(d) Geometry

|     |           |           |           |
|-----|-----------|-----------|-----------|
| C O | -1.995273 | -1.374472 | -0.369152 |
| C O | -0.666838 | -0.825975 | 0.232115  |
| O O | -2.157472 | -0.876210 | -1.715328 |
| C O | -3.316353 | -0.892373 | 0.246178  |
| C O | -2.597704 | 0.440793  | -1.474876 |
| C O | -0.645369 | 0.758162  | 0.236130  |
| O O | -3.571610 | 0.347077  | -0.438454 |
| C O | 0.438596  | -1.373300 | -0.716695 |
| C O | -1.372889 | 1.269434  | -1.030146 |
| C O | 0.791809  | 1.334668  | 0.326188  |
| C O | 1.803496  | -0.729586 | -0.647649 |
| O O | -1.049799 | 2.263959  | -1.647025 |
| C O | 1.954944  | 0.524478  | -0.196456 |
| C O | 2.902503  | -1.604616 | -1.200231 |
| C O | 3.261783  | 1.277961  | -0.126435 |
| C O | -0.446876 | -1.409987 | 1.639554  |
| C O | -1.418858 | 1.428046  | 1.417705  |
| H O | -1.941590 | -2.465008 | -0.435382 |
| H O | -3.276053 | -0.717844 | 1.324126  |
| H O | -4.128325 | -1.595105 | 0.027394  |
| H O | -3.042078 | 0.863827  | -2.378391 |
| H O | 0.083957  | -1.307590 | -1.753483 |
| H O | 0.541781  | -2.450541 | -0.516764 |
| H O | 1.005607  | 1.571666  | 1.379639  |
| H O | 0.774304  | 2.306217  | -0.185660 |
| H O | 2.647706  | -1.945763 | -2.213738 |
| H O | 3.022196  | -2.511898 | -0.591000 |
| H O | 3.873474  | -1.109171 | -1.255713 |
| H O | 3.441889  | 1.646136  | 0.893603  |
| H O | 3.231537  | 2.165872  | -0.773320 |
| H O | 4.128325  | 0.682030  | -0.418729 |
| H O | -0.415171 | -2.505383 | 1.594520  |
| H O | -1.234971 | -1.131858 | 2.345959  |
| H O | 0.509354  | -1.072320 | 2.052673  |
| H O | -1.008036 | 1.104300  | 2.378391  |
| H O | -2.492643 | 1.246590  | 1.403845  |
| H O | -1.274952 | 2.511898  | 1.347525  |
